# Supplementary material for: Metagenomic analysis reveals unexplored diversity of archaeal virome in the human gut
Source: Nat Commun. 2022 Dec 29;13:7978. doi: 10.1038/s41467-022-35735-y (PMC9800368; doi:10.1038/s41467-022-35735-y)
Supplement: Supplementary file 6 — Data 3 [file 41467_2022_35735_MOESM6_ESM.xlsx]

## Sheet: a. 1162 genomes in UHGG
Genome	Original name	Study set	Genome type	Length (bp)	Number of contigs	N50	GC content %	Completeness %	Contamination%	Cmseq	% 5S rRNA	% 16S rRNA	% 23S rRNA	tRNA	Genome accession	Species representative	MGnify accession	Genome Taxonomy Database lineage	Sample accession	Study accession	Country	Continent
GUT_GENOME001950	AsnicarF_2017__MV_FEM2_t1Q14__bin.31	CIBIO	MAG	1688884	198	11182	31.48	97.73	0	0.06	0	0	0	20	NA	GUT_GENOME132205	MGYG-HGUT-02163	d__Archaea;p__Methanobacteriota;c__Methanobacteria;o__Methanobacteriales;f__Methanobacteriaceae;g__Methanobrevibacter_A;s__Methanobrevibacter_A smithii	SRS1634658	SRP082656	Italy	Europe
GUT_GENOME001966	AsnicarF_2017__MV_FEM3_t1Q14__bin.6	CIBIO	MAG	1673573	189	11383	31.33	96.63	0.8	0.04	0	0	0	19	NA	GUT_GENOME132205	MGYG-HGUT-02163	d__Archaea;p__Methanobacteriota;c__Methanobacteria;o__Methanobacteriales;f__Methanobacteriaceae;g__Methanobrevibacter_A;s__Methanobrevibacter_A smithii	SRS1634636	SRP082656	Italy	Europe
GUT_GENOME002944	BackhedF_2015__SID18_M__bin.51	CIBIO	MAG	1175436	364	3508	32.47	74.91	4.84	0.02	0	0	0	10	NA	GUT_GENOME132205	MGYG-HGUT-02163	d__Archaea;p__Methanobacteriota;c__Methanobacteria;o__Methanobacteriales;f__Methanobacteriaceae;g__Methanobrevibacter_A;s__Methanobrevibacter_A smithii	ERS473088	ERP005989	Sweden	Europe
GUT_GENOME003140	BackhedF_2015__SID224_M__bin.32	CIBIO	MAG	1626508	113	20047	31.49	98	0	0.01	0	99.8	99.5	20	NA	GUT_GENOME132205	MGYG-HGUT-02163	d__Archaea;p__Methanobacteriota;c__Methanobacteria;o__Methanobacteriales;f__Methanobacteriaceae;g__Methanobrevibacter_A;s__Methanobrevibacter_A smithii	ERS473106	ERP005989	Sweden	Europe
GUT_GENOME004154	BackhedF_2015__SID335_M__bin.3	CIBIO	MAG	1190717	367	3517	32.38	72.89	0	0.02	0	0	0	10	NA	GUT_GENOME132205	MGYG-HGUT-02163	d__Archaea;p__Methanobacteriota;c__Methanobacteria;o__Methanobacteriales;f__Methanobacteriaceae;g__Methanobrevibacter_A;s__Methanobrevibacter_A smithii	ERS473186	ERP005989	Sweden	Europe
GUT_GENOME004675	BackhedF_2015__SID385_M__bin.37	CIBIO	MAG	996442	293	3643	56.44	68.35	0.81	0.02	87.39	0	97.73	16	NA	GUT_GENOME143252	MGYG-HGUT-02456	d__Archaea;p__Thermoplasmatota;c__Thermoplasmata;o__Methanomassiliicoccales;f__Methanomethylophilaceae;g__Methanomethylophilus;s__Methanomethylophilus alvus	ERS473224	ERP005989	Sweden	Europe
GUT_GENOME004870	BackhedF_2015__SID39_M__bin.36	CIBIO	MAG	1431654	144	13735	31.88	91.2	0	0.01	0	99.8	99.5	19	NA	GUT_GENOME132205	MGYG-HGUT-02163	d__Archaea;p__Methanobacteriota;c__Methanobacteria;o__Methanobacteriales;f__Methanobacteriaceae;g__Methanobrevibacter_A;s__Methanobrevibacter_A smithii	ERS473238	ERP005989	Sweden	Europe
GUT_GENOME005651	BackhedF_2015__SID544_M__bin.44	CIBIO	MAG	2067058	285	9878	30.57	95.33	0.8	0.04	0	0	0	20	NA	GUT_GENOME143185	MGYG-HGUT-02446	d__Archaea;p__Methanobacteriota;c__Methanobacteria;o__Methanobacteriales;f__Methanobacteriaceae;g__Methanobrevibacter_A;s__Methanobrevibacter_A smithii_A	ERS473294	ERP005989	Sweden	Europe
GUT_GENOME005889	BackhedF_2015__SID566_M__bin.1	CIBIO	MAG	1656755	271	7456	31.86	88.93	0	0.02	0	0	0	17	NA	GUT_GENOME132205	MGYG-HGUT-02163	d__Archaea;p__Methanobacteriota;c__Methanobacteria;o__Methanobacteriales;f__Methanobacteriaceae;g__Methanobrevibacter_A;s__Methanobrevibacter_A smithii	ERS473314	ERP005989	Sweden	Europe
GUT_GENOME006755	BackhedF_2015__SID624_M__bin.40	CIBIO	MAG	1504488	227	8579	31.84	94.93	0.8	0.02	0	0	0	20	NA	GUT_GENOME132205	MGYG-HGUT-02163	d__Archaea;p__Methanobacteriota;c__Methanobacteria;o__Methanobacteriales;f__Methanobacteriaceae;g__Methanobrevibacter_A;s__Methanobrevibacter_A smithii	ERS473378	ERP005989	Sweden	Europe
GUT_GENOME007534	Bengtsson-PalmeJ_2015__TRAVELRES11__bin.60	CIBIO	MAG	1730101	16	179632	41.36	97.98	0.81	0	92.44	99.86	99.03	19	NA	GUT_GENOME132202	MGYG-HGUT-02160	d__Archaea;p__Thermoplasmatota;c__Thermoplasmata;o__Methanomassiliicoccales;f__Methanomassiliicoccaceae;g__Methanomassiliicoccus_A;s__Methanomassiliicoccus_A intestinalis	ERS554202	ERP007090	Sweden	Europe
GUT_GENOME008460	Bengtsson-PalmeJ_2015__TRAVELRES27__bin.188	CIBIO	MAG	924319	314	3153	32.12	59.98	1.6	0.06	0	0	0	8	NA	GUT_GENOME132205	MGYG-HGUT-02163	d__Archaea;p__Methanobacteriota;c__Methanobacteria;o__Methanobacteriales;f__Methanobacteriaceae;g__Methanobrevibacter_A;s__Methanobrevibacter_A smithii	ERS554218	ERP007090	Sweden	Europe
GUT_GENOME010455	Bengtsson-PalmeJ_2015__TRAVELRES62__bin.104	CIBIO	MAG	1308259	4	709222	31.4	76.8	0	0.01	0	0	0	18	NA	GUT_GENOME132205	MGYG-HGUT-02163	d__Archaea;p__Methanobacteriota;c__Methanobacteria;o__Methanobacteriales;f__Methanobacteriaceae;g__Methanobrevibacter_A;s__Methanobrevibacter_A smithii	ERS554253	ERP007090	Sweden	Europe
GUT_GENOME011061	Bengtsson-PalmeJ_2015__TRAVELRES9__bin.78	CIBIO	MAG	1734278	66	42292	31.17	98.4	0	0.01	0	0	0	20	NA	GUT_GENOME132205	MGYG-HGUT-02163	d__Archaea;p__Methanobacteriota;c__Methanobacteria;o__Methanobacteriales;f__Methanobacteriaceae;g__Methanobrevibacter_A;s__Methanobrevibacter_A smithii	ERS554200	ERP007090	Sweden	Europe
GUT_GENOME011127	BritoIL_2016__M1.15.ST__bin.35	CIBIO	MAG	1744052	23	164533	31.09	100	0.13	0.01	0	0	0	20	NA	GUT_GENOME132205	MGYG-HGUT-02163	d__Archaea;p__Methanobacteriota;c__Methanobacteria;o__Methanobacteriales;f__Methanobacteriaceae;g__Methanobrevibacter_A;s__Methanobrevibacter_A smithii	SRS476076	SRP029441	Fiji	Oceania
GUT_GENOME011175	BritoIL_2016__M1.16.ST__bin.13	CIBIO	MAG	1710723	22	191059	31.26	100	0	0.02	0	0	0	20	NA	GUT_GENOME132205	MGYG-HGUT-02163	d__Archaea;p__Methanobacteriota;c__Methanobacteria;o__Methanobacteriales;f__Methanobacteriaceae;g__Methanobrevibacter_A;s__Methanobrevibacter_A smithii	SRS476144	SRP029441	Fiji	Oceania
GUT_GENOME011215	BritoIL_2016__M1.16.ST__bin.89	CIBIO	MAG	1667667	194	11728	58.73	88.67	0.81	0.01	0	0	0	20	NA	GUT_GENOME268463	MGYG-HGUT-04339	d__Archaea;p__Thermoplasmatota;c__Thermoplasmata;o__Methanomassiliicoccales;f__Methanomethylophilaceae;g__UBA71;s__	SRS476144	SRP029441	Fiji	Oceania
GUT_GENOME011239	BritoIL_2016__M1.1.ST__bin.30	CIBIO	MAG	1717289	54	53265	31.22	100	0	0	0	0	0	20	NA	GUT_GENOME132205	MGYG-HGUT-02163	d__Archaea;p__Methanobacteriota;c__Methanobacteria;o__Methanobacteriales;f__Methanobacteriaceae;g__Methanobrevibacter_A;s__Methanobrevibacter_A smithii	SRS475566	SRP029441	Fiji	Oceania
GUT_GENOME011450	BritoIL_2016__M1.27.ST__bin.21	CIBIO	MAG	1413564	344	4618	59.22	89.92	2.55	0.43	86.55	0	0	17	NA	GUT_GENOME268463	MGYG-HGUT-04339	d__Archaea;p__Thermoplasmatota;c__Thermoplasmata;o__Methanomassiliicoccales;f__Methanomethylophilaceae;g__UBA71;s__	SRS476430	SRP029441	Fiji	Oceania
GUT_GENOME011713	BritoIL_2016__M1.44.ST__bin.63	CIBIO	MAG	1385480	220	8430	47.64	89.52	1.88	0.01	85.71	11.58	10.1	20	NA	GUT_GENOME020782	MGYG-HGUT-00654	d__Archaea;p__Thermoplasmatota;c__Thermoplasmata;o__Methanomassiliicoccales;f__Methanomethylophilaceae;g__;s__	SRS476187	SRP029441	Fiji	Oceania
GUT_GENOME011714	BritoIL_2016__M1.44.ST__bin.66	CIBIO	MAG	1724941	37	78801	31.15	100	0	0.03	0	0	0	20	NA	GUT_GENOME132205	MGYG-HGUT-02163	d__Archaea;p__Methanobacteriota;c__Methanobacteria;o__Methanobacteriales;f__Methanobacteriaceae;g__Methanobrevibacter_A;s__Methanobrevibacter_A smithii	SRS476187	SRP029441	Fiji	Oceania
GUT_GENOME011731	BritoIL_2016__M1.44.ST__bin.97	CIBIO	MAG	1618128	213	10374	58.73	92.47	2.48	0.05	86.55	0	0	19	NA	GUT_GENOME268463	MGYG-HGUT-04339	d__Archaea;p__Thermoplasmatota;c__Thermoplasmata;o__Methanomassiliicoccales;f__Methanomethylophilaceae;g__UBA71;s__	SRS476187	SRP029441	Fiji	Oceania
GUT_GENOME011754	BritoIL_2016__M1.48.ST__bin.34	CIBIO	MAG	1344820	217	7894	31.89	86.56	1.6	0.04	0	0	0	16	NA	GUT_GENOME132205	MGYG-HGUT-02163	d__Archaea;p__Methanobacteriota;c__Methanobacteria;o__Methanobacteriales;f__Methanobacteriaceae;g__Methanobrevibacter_A;s__Methanobrevibacter_A smithii	SRS476070	SRP029441	Fiji	Oceania
GUT_GENOME011962	BritoIL_2016__M1.61.ST__bin.20	CIBIO	MAG	1185566	244	6505	32.17	87.7	3.2	0.03	0	0	0	13	NA	GUT_GENOME132205	MGYG-HGUT-02163	d__Archaea;p__Methanobacteriota;c__Methanobacteria;o__Methanobacteriales;f__Methanobacteriaceae;g__Methanobrevibacter_A;s__Methanobrevibacter_A smithii	SRS476120	SRP029441	Fiji	Oceania
GUT_GENOME012531	BritoIL_2016__M2.44.ST__bin.96	CIBIO	MAG	1738858	68	52050	31.09	100	0.8	0.01	0	0	0	20	NA	GUT_GENOME132205	MGYG-HGUT-02163	d__Archaea;p__Methanobacteriota;c__Methanobacteria;o__Methanobacteriales;f__Methanobacteriaceae;g__Methanobrevibacter_A;s__Methanobrevibacter_A smithii	SRS476058	SRP029441	Fiji	Oceania
GUT_GENOME012603	BritoIL_2016__M2.46.ST__bin.92	CIBIO	MAG	1728223	18	235765	31.23	100	0	0.01	0	0	0	20	NA	GUT_GENOME132205	MGYG-HGUT-02163	d__Archaea;p__Methanobacteriota;c__Methanobacteria;o__Methanobacteriales;f__Methanobacteriaceae;g__Methanobrevibacter_A;s__Methanobrevibacter_A smithii	SRS476302	SRP029441	Fiji	Oceania
GUT_GENOME012629	BritoIL_2016__M2.49.ST__bin.103	CIBIO	MAG	1706339	234	9756	58.7	92.34	0.81	0.02	86.55	0	0	19	NA	GUT_GENOME268463	MGYG-HGUT-04339	d__Archaea;p__Thermoplasmatota;c__Thermoplasmata;o__Methanomassiliicoccales;f__Methanomethylophilaceae;g__UBA71;s__	SRS476155	SRP029441	Fiji	Oceania
GUT_GENOME012788	BritoIL_2016__M2.57.ST__bin.65	CIBIO	MAG	1587601	74	37605	31.48	100	0	0.01	0	0	0	20	NA	GUT_GENOME132205	MGYG-HGUT-02163	d__Archaea;p__Methanobacteriota;c__Methanobacteria;o__Methanobacteriales;f__Methanobacteriaceae;g__Methanobrevibacter_A;s__Methanobrevibacter_A smithii	SRS475929	SRP029441	Fiji	Oceania
GUT_GENOME013044	BritoIL_2016__W1.1.ST__bin.57	CIBIO	MAG	1171496	256	5564	59.73	89.11	0	0.6	86.55	0	0	16	NA	GUT_GENOME268463	MGYG-HGUT-04339	d__Archaea;p__Thermoplasmatota;c__Thermoplasmata;o__Methanomassiliicoccales;f__Methanomethylophilaceae;g__UBA71;s__	SRS476035	SRP029441	Fiji	Oceania
GUT_GENOME013047	BritoIL_2016__W1.1.ST__bin.60	CIBIO	MAG	1628368	48	60464	31.4	99.2	1.6	0.06	0	0	0	20	NA	GUT_GENOME132205	MGYG-HGUT-02163	d__Archaea;p__Methanobacteriota;c__Methanobacteria;o__Methanobacteriales;f__Methanobacteriaceae;g__Methanobrevibacter_A;s__Methanobrevibacter_A smithii	SRS476035	SRP029441	Fiji	Oceania
GUT_GENOME013200	BritoIL_2016__W1.27.ST__bin.6	CIBIO	MAG	1319824	355	4306	59.29	89.92	2.48	0.45	86.55	99.8	0	16	NA	GUT_GENOME268463	MGYG-HGUT-04339	d__Archaea;p__Thermoplasmatota;c__Thermoplasmata;o__Methanomassiliicoccales;f__Methanomethylophilaceae;g__UBA71;s__	SRS475981	SRP029441	Fiji	Oceania
GUT_GENOME013316	BritoIL_2016__W1.33.ST__bin.66	CIBIO	MAG	1689218	246	8527	58.69	94.76	0.81	0.06	0	99.8	0	19	NA	GUT_GENOME268463	MGYG-HGUT-04339	d__Archaea;p__Thermoplasmatota;c__Thermoplasmata;o__Methanomassiliicoccales;f__Methanomethylophilaceae;g__UBA71;s__	SRS476192	SRP029441	Fiji	Oceania
GUT_GENOME013709	BritoIL_2016__W1.5.ST__bin.1	CIBIO	MAG	1358670	291	5570	56.3	87.52	1.88	0.23	87.39	0	0	19	NA	GUT_GENOME234397	MGYG-HGUT-03455	d__Archaea;p__Thermoplasmatota;c__Thermoplasmata;o__Methanomassiliicoccales;f__Methanomethylophilaceae;g__UBA71;s__	SRS475979	SRP029441	Fiji	Oceania
GUT_GENOME013945	BritoIL_2016__W2.19.ST__bin.1	CIBIO	MAG	1689766	258	8119	58.53	93.89	1.61	0.02	0	0	0	20	NA	GUT_GENOME268463	MGYG-HGUT-04339	d__Archaea;p__Thermoplasmatota;c__Thermoplasmata;o__Methanomassiliicoccales;f__Methanomethylophilaceae;g__UBA71;s__	SRS476094	SRP029441	Fiji	Oceania
GUT_GENOME014139	BritoIL_2016__W2.35.ST__bin.32	CIBIO	MAG	1520245	229	8643	31.63	93.83	2.4	0.02	0	99.8	0	20	NA	GUT_GENOME132205	MGYG-HGUT-02163	d__Archaea;p__Methanobacteriota;c__Methanobacteria;o__Methanobacteriales;f__Methanobacteriaceae;g__Methanobrevibacter_A;s__Methanobrevibacter_A smithii	SRS475534	SRP029441	Fiji	Oceania
GUT_GENOME014159	BritoIL_2016__W2.35.ST__bin.68	CIBIO	MAG	1570987	223	9693	58.92	92.74	1.61	0.41	86.55	0	0	19	NA	GUT_GENOME268463	MGYG-HGUT-04339	d__Archaea;p__Thermoplasmatota;c__Thermoplasmata;o__Methanomassiliicoccales;f__Methanomethylophilaceae;g__UBA71;s__	SRS475534	SRP029441	Fiji	Oceania
GUT_GENOME014213	BritoIL_2016__W2.39.ST__bin.42	CIBIO	MAG	1716487	184	13845	58.53	96.37	1.61	0.16	86.55	0	0	19	NA	GUT_GENOME268463	MGYG-HGUT-04339	d__Archaea;p__Thermoplasmatota;c__Thermoplasmata;o__Methanomassiliicoccales;f__Methanomethylophilaceae;g__UBA71;s__	SRS476014	SRP029441	Fiji	Oceania
GUT_GENOME014311	BritoIL_2016__W2.43.ST__bin.33	CIBIO	MAG	1691878	132	17954	31.67	99.2	0	0.05	0	0	10.7	19	NA	GUT_GENOME014311	MGYG-HGUT-00522	d__Archaea;p__Methanobacteriota;c__Methanobacteria;o__Methanobacteriales;f__Methanobacteriaceae;g__Methanobrevibacter_A;s__	SRS475589	SRP029441	Fiji	Oceania
GUT_GENOME014636	BritoIL_2016__W2.61.ST__bin.39	CIBIO	MAG	1561352	219	10628	59.03	92.34	1.61	0.46	86.55	0	0	18	NA	GUT_GENOME268463	MGYG-HGUT-04339	d__Archaea;p__Thermoplasmatota;c__Thermoplasmata;o__Methanomassiliicoccales;f__Methanomethylophilaceae;g__UBA71;s__	SRS475987	SRP029441	Fiji	Oceania
GUT_GENOME014857	BritoIL_2016__W2.7.ST__bin.42	CIBIO	MAG	1779097	238	9968	58.37	94.76	1.61	0.28	0	0	0	20	NA	GUT_GENOME268463	MGYG-HGUT-04339	d__Archaea;p__Thermoplasmatota;c__Thermoplasmata;o__Methanomassiliicoccales;f__Methanomethylophilaceae;g__UBA71;s__	SRS475537	SRP029441	Fiji	Oceania
GUT_GENOME014892	BritoIL_2016__W2.8.ST__bin.37	CIBIO	MAG	1039902	21	93737	31.16	52.8	0	0.01	0	0	0	12	NA	GUT_GENOME132205	MGYG-HGUT-02163	d__Archaea;p__Methanobacteriota;c__Methanobacteria;o__Methanobacteriales;f__Methanobacteriaceae;g__Methanobrevibacter_A;s__Methanobrevibacter_A smithii	SRS476185	SRP029441	Fiji	Oceania
GUT_GENOME014948	BritoIL_2016__W2.9.ST__bin.80	CIBIO	MAG	1260185	277	5432	32.09	83.91	2.52	0.03	0	62.97	0	14	NA	GUT_GENOME132205	MGYG-HGUT-02163	d__Archaea;p__Methanobacteriota;c__Methanobacteria;o__Methanobacteriales;f__Methanobacteriaceae;g__Methanobrevibacter_A;s__Methanobrevibacter_A smithii	SRS476104	SRP029441	Fiji	Oceania
GUT_GENOME015150	BritoIL_2016__W3.22.ST__bin.129	CIBIO	MAG	1751142	130	25873	58.69	95.56	0.81	0.27	0	99.8	0	19	NA	GUT_GENOME268463	MGYG-HGUT-04339	d__Archaea;p__Thermoplasmatota;c__Thermoplasmata;o__Methanomassiliicoccales;f__Methanomethylophilaceae;g__UBA71;s__	SRS476098	SRP029441	Fiji	Oceania
GUT_GENOME015165	BritoIL_2016__W3.22.ST__bin.34	CIBIO	MAG	1687393	98	29229	31.52	99.66	1.33	0.07	0	0	0	19	NA	GUT_GENOME132205	MGYG-HGUT-02163	d__Archaea;p__Methanobacteriota;c__Methanobacteria;o__Methanobacteriales;f__Methanobacteriaceae;g__Methanobrevibacter_A;s__Methanobrevibacter_A smithii	SRS476098	SRP029441	Fiji	Oceania
GUT_GENOME015317	BritoIL_2016__WL.14.ST__bin.21	CIBIO	MAG	1979329	393	6103	31.27	96.8	4.5	0.06	0	0	0	19	NA	GUT_GENOME132205	MGYG-HGUT-02163	d__Archaea;p__Methanobacteriota;c__Methanobacteria;o__Methanobacteriales;f__Methanobacteriaceae;g__Methanobrevibacter_A;s__Methanobrevibacter_A smithii	SRS475931	SRP029441	Fiji	Oceania
GUT_GENOME017321	ChengpingW_2017__AS78raw__bin.14	CIBIO	MAG	1778978	161	16240	59.91	97.13	0	0	87.39	0	97.99	20	NA	GUT_GENOME251929	MGYG-HGUT-03962	d__Archaea;p__Thermoplasmatota;c__Thermoplasmata;o__Methanomassiliicoccales;f__Methanomethylophilaceae;g__UBA71;s__	SRS1997006	SRP100575	China	Asia
GUT_GENOME017714	CM_madagascar__A07_01_1FE__bin.60	CIBIO	MAG	1462007	194	9879	31.78	93.6	0	0.01	0	0	0	19	NA	GUT_GENOME132205	MGYG-HGUT-02163	d__Archaea;p__Methanobacteriota;c__Methanobacteria;o__Methanobacteriales;f__Methanobacteriaceae;g__Methanobrevibacter_A;s__Methanobrevibacter_A smithii	SRS3638671	SRP156699	Madagascar	Africa
GUT_GENOME017725	CM_madagascar__A08_01_1FE__bin.21	CIBIO	MAG	1320883	388	3822	58.86	77.85	1.61	0.14	0	0	0	18	NA	GUT_GENOME268463	MGYG-HGUT-04339	d__Archaea;p__Thermoplasmatota;c__Thermoplasmata;o__Methanomassiliicoccales;f__Methanomethylophilaceae;g__UBA71;s__	SRS3638603	SRP156699	Madagascar	Africa
GUT_GENOME017914	CM_madagascar__A23_01_1FE__bin.15	CIBIO	MAG	1076113	374	3101	33.06	62.96	0.8	0.05	0	0	0	5	NA	GUT_GENOME132205	MGYG-HGUT-02163	d__Archaea;p__Methanobacteriota;c__Methanobacteria;o__Methanobacteriales;f__Methanobacteriaceae;g__Methanobrevibacter_A;s__Methanobrevibacter_A smithii	SRS3638632	SRP156699	Madagascar	Africa
GUT_GENOME017996	CM_madagascar__A28_02_1FE__bin.81	CIBIO	MAG	1718518	150	15614	31.4	96.13	0.8	0.01	0	0	11.54	19	NA	GUT_GENOME132205	MGYG-HGUT-02163	d__Archaea;p__Methanobacteriota;c__Methanobacteria;o__Methanobacteriales;f__Methanobacteriaceae;g__Methanobrevibacter_A;s__Methanobrevibacter_A smithii	SRS3638653	SRP156699	Madagascar	Africa
GUT_GENOME018095	CM_madagascar__A39_01_1FE__bin.26	CIBIO	MAG	1579449	441	3989	31.83	79.99	0	0.03	0	0	0	10	NA	GUT_GENOME132205	MGYG-HGUT-02163	d__Archaea;p__Methanobacteriota;c__Methanobacteria;o__Methanobacteriales;f__Methanobacteriaceae;g__Methanobrevibacter_A;s__Methanobrevibacter_A smithii	SRS3638604	SRP156699	Madagascar	Africa
GUT_GENOME018227	CM_madagascar__A47_02_1FE__bin.31	CIBIO	MAG	1646539	415	4453	32.21	80.71	1.6	0.01	0	0	0	12	NA	GUT_GENOME132205	MGYG-HGUT-02163	d__Archaea;p__Methanobacteriota;c__Methanobacteria;o__Methanobacteriales;f__Methanobacteriaceae;g__Methanobrevibacter_A;s__Methanobrevibacter_A smithii	SRS3638605	SRP156699	Madagascar	Africa
GUT_GENOME018402	CM_madagascar__A62_01_1FE__bin.22	CIBIO	MAG	897991	326	2831	33.41	57.7	0.8	0.08	0	0	0	5	NA	GUT_GENOME132205	MGYG-HGUT-02163	d__Archaea;p__Methanobacteriota;c__Methanobacteria;o__Methanobacteriales;f__Methanobacteriaceae;g__Methanobrevibacter_A;s__Methanobrevibacter_A smithii	SRS3638606	SRP156699	Madagascar	Africa
GUT_GENOME018608	CM_madagascar__A79_02_1FE__bin.42	CIBIO	MAG	1968690	181	18274	31.25	98.53	0.8	0.02	0	0	0	20	NA	GUT_GENOME132205	MGYG-HGUT-02163	d__Archaea;p__Methanobacteriota;c__Methanobacteria;o__Methanobacteriales;f__Methanobacteriaceae;g__Methanobrevibacter_A;s__Methanobrevibacter_A smithii	SRS3638608	SRP156699	Madagascar	Africa
GUT_GENOME018643	CM_madagascar__A81_01_1FE__bin.7	CIBIO	MAG	935568	324	3014	33.05	68.4	0.53	0.01	0	0	0	4	NA	GUT_GENOME132205	MGYG-HGUT-02163	d__Archaea;p__Methanobacteriota;c__Methanobacteria;o__Methanobacteriales;f__Methanobacteriaceae;g__Methanobrevibacter_A;s__Methanobrevibacter_A smithii	SRS3638616	SRP156699	Madagascar	Africa
GUT_GENOME018729	CM_madagascar__A88_02_1FE__bin.24	CIBIO	MAG	1725435	205	13256	31.61	97.6	0	0.01	0	99.8	99.5	20	NA	GUT_GENOME132205	MGYG-HGUT-02163	d__Archaea;p__Methanobacteriota;c__Methanobacteria;o__Methanobacteriales;f__Methanobacteriaceae;g__Methanobrevibacter_A;s__Methanobrevibacter_A smithii	SRS3638588	SRP156699	Madagascar	Africa
GUT_GENOME019172	CM_madagascar__V30_01_1FE__bin.1	CIBIO	MAG	1459610	335	5044	32.2	81.73	0.8	0.09	0	0	0	19	NA	GUT_GENOME132205	MGYG-HGUT-02163	d__Archaea;p__Methanobacteriota;c__Methanobacteria;o__Methanobacteriales;f__Methanobacteriaceae;g__Methanobrevibacter_A;s__Methanobrevibacter_A smithii	SRS3638613	SRP156699	Madagascar	Africa
GUT_GENOME019331	CM_madagascar__V53_02_1FE__bin.32	CIBIO	MAG	1409099	418	3802	32.66	74.16	0.36	0.04	0	0	0	8	NA	GUT_GENOME132205	MGYG-HGUT-02163	d__Archaea;p__Methanobacteriota;c__Methanobacteria;o__Methanobacteriales;f__Methanobacteriaceae;g__Methanobrevibacter_A;s__Methanobrevibacter_A smithii	SRS3638592	SRP156699	Madagascar	Africa
GUT_GENOME020562	CosteaPI_2017__halbarad-11-392-0__bin.53	CIBIO	MAG	2026739	214	16279	30.1	99.2	2.56	0.04	0	99.8	99.5	20	NA	GUT_GENOME143185	MGYG-HGUT-02446	d__Archaea;p__Methanobacteriota;c__Methanobacteria;o__Methanobacteriales;f__Methanobacteriaceae;g__Methanobrevibacter_A;s__Methanobrevibacter_A smithii_A	ERS1444683	ERP019502	Germany	Europe
GUT_GENOME020632	CosteaPI_2017__mickey1-11-0-0__bin.19	CIBIO	MAG	1592794	48	46427	44.66	95.16	2.42	0.01	93.28	99.86	99.06	18	NA	GUT_GENOME112422	MGYG-HGUT-01856	d__Archaea;p__Thermoplasmatota;c__Thermoplasmata;o__Methanomassiliicoccales;f__Methanomassiliicoccaceae;g__Methanomassiliicoccus_A;s__	ERS1444687	ERP019502	Germany	Europe
GUT_GENOME020682	CosteaPI_2017__mickey1-11-30-0__bin.49	CIBIO	MAG	1298049	226	7165	44.84	88.31	2.82	0	93.28	0	0	18	NA	GUT_GENOME112422	MGYG-HGUT-01856	d__Archaea;p__Thermoplasmatota;c__Thermoplasmata;o__Methanomassiliicoccales;f__Methanomassiliicoccaceae;g__Methanomassiliicoccus_A;s__	ERS1444688	ERP019502	Germany	Europe
GUT_GENOME020722	CosteaPI_2017__mickey2-11-0-0__bin.28	CIBIO	MAG	1783803	16	168281	30.99	100	0	0	0	0	0	20	NA	GUT_GENOME132205	MGYG-HGUT-02163	d__Archaea;p__Methanobacteriota;c__Methanobacteria;o__Methanobacteriales;f__Methanobacteriaceae;g__Methanobrevibacter_A;s__Methanobrevibacter_A smithii	ERS1444690	ERP019502	Germany	Europe
GUT_GENOME020734	CosteaPI_2017__mickey2-11-0-0__bin.42	CIBIO	MAG	1312594	55	42607	47.95	88.71	0.81	0	85.71	49.56	19.73	19	NA	GUT_GENOME020782	MGYG-HGUT-00654	d__Archaea;p__Thermoplasmatota;c__Thermoplasmata;o__Methanomassiliicoccales;f__Methanomethylophilaceae;g__;s__	ERS1444690	ERP019502	Germany	Europe
GUT_GENOME020748	CosteaPI_2017__mickey2-11-0-0__bin.63	CIBIO	MAG	1549114	93	26464	56.27	94.35	0	0.01	87.39	24.1	99.13	20	NA	GUT_GENOME143252	MGYG-HGUT-02456	d__Archaea;p__Thermoplasmatota;c__Thermoplasmata;o__Methanomassiliicoccales;f__Methanomethylophilaceae;g__Methanomethylophilus;s__Methanomethylophilus alvus	ERS1444690	ERP019502	Germany	Europe
GUT_GENOME020752	CosteaPI_2017__mickey2-11-30-0__bin.12	CIBIO	MAG	1569467	377	4762	31.87	85	0.27	0.01	0	0	0	19	NA	GUT_GENOME132205	MGYG-HGUT-02163	d__Archaea;p__Methanobacteriota;c__Methanobacteria;o__Methanobacteriales;f__Methanobacteriaceae;g__Methanobrevibacter_A;s__Methanobrevibacter_A smithii	ERS1444691	ERP019502	Germany	Europe
GUT_GENOME020782	CosteaPI_2017__mickey2-11-30-0__bin.66	CIBIO	MAG	1448574	77	28351	47.63	97.18	0.81	0	85.71	0	59.4	20	NA	GUT_GENOME020782	MGYG-HGUT-00654	d__Archaea;p__Thermoplasmatota;c__Thermoplasmata;o__Methanomassiliicoccales;f__Methanomethylophilaceae;g__;s__	ERS1444691	ERP019502	Germany	Europe
GUT_GENOME020784	CosteaPI_2017__mickey2-11-30-0__bin.69	CIBIO	MAG	1550582	62	38998	56.24	98.39	0	0.01	87.39	25.39	69.7	20	NA	GUT_GENOME143252	MGYG-HGUT-02456	d__Archaea;p__Thermoplasmatota;c__Thermoplasmata;o__Methanomassiliicoccales;f__Methanomethylophilaceae;g__Methanomethylophilus;s__Methanomethylophilus alvus	ERS1444691	ERP019502	Germany	Europe
GUT_GENOME020796	CosteaPI_2017__mickey2-11-7-0__bin.2	CIBIO	MAG	1123875	283	4816	47.59	73.43	2.82	0.02	85.71	49.76	0	17	NA	GUT_GENOME020782	MGYG-HGUT-00654	d__Archaea;p__Thermoplasmatota;c__Thermoplasmata;o__Methanomassiliicoccales;f__Methanomethylophilaceae;g__;s__	ERS1444692	ERP019502	Germany	Europe
GUT_GENOME020819	CosteaPI_2017__mickey2-11-7-0__bin.59	CIBIO	MAG	1817949	21	168915	30.97	100	0	0.01	0	0	0	20	NA	GUT_GENOME132205	MGYG-HGUT-02163	d__Archaea;p__Methanobacteriota;c__Methanobacteria;o__Methanobacteriales;f__Methanobacteriaceae;g__Methanobrevibacter_A;s__Methanobrevibacter_A smithii	ERS1444692	ERP019502	Germany	Europe
GUT_GENOME020824	CosteaPI_2017__mickey2-11-7-0__bin.9	CIBIO	MAG	856097	274	3275	56.41	58.21	0	0.04	87.39	0	18.7	18	NA	GUT_GENOME143252	MGYG-HGUT-02456	d__Archaea;p__Thermoplasmatota;c__Thermoplasmata;o__Methanomassiliicoccales;f__Methanomethylophilaceae;g__Methanomethylophilus;s__Methanomethylophilus alvus	ERS1444692	ERP019502	Germany	Europe
GUT_GENOME021825	CosteaPI_2017__SID713A004-11-0-0__bin.77	CIBIO	MAG	1591016	53	57901	31.56	98.4	0.8	0.01	0	99.8	99.5	20	NA	GUT_GENOME132205	MGYG-HGUT-02163	d__Archaea;p__Methanobacteriota;c__Methanobacteria;o__Methanobacteriales;f__Methanobacteriaceae;g__Methanobrevibacter_A;s__Methanobrevibacter_A smithii	ERS1444461	ERP019502	Kazakhstan	Asia
GUT_GENOME021873	CosteaPI_2017__SID713A004-11-90-0__bin.80	CIBIO	MAG	1718996	82	36231	31.32	98.4	0	0.01	0	99.8	99.5	20	NA	GUT_GENOME132205	MGYG-HGUT-02163	d__Archaea;p__Methanobacteriota;c__Methanobacteria;o__Methanobacteriales;f__Methanobacteriaceae;g__Methanobrevibacter_A;s__Methanobrevibacter_A smithii	ERS1444462	ERP019502	Kazakhstan	Asia
GUT_GENOME021902	CosteaPI_2017__SID713A005-11-0-0__bin.6	CIBIO	MAG	1667485	207	10963	31.52	94.8	0	0.01	0	99.8	99.5	20	NA	GUT_GENOME132205	MGYG-HGUT-02163	d__Archaea;p__Methanobacteriota;c__Methanobacteria;o__Methanobacteriales;f__Methanobacteriaceae;g__Methanobrevibacter_A;s__Methanobrevibacter_A smithii	ERS1444463	ERP019502	Kazakhstan	Asia
GUT_GENOME021924	CosteaPI_2017__SID713A005-11-90-0__bin.48	CIBIO	MAG	1203733	309	4482	32.38	78.71	0	0.03	0	0	0	7	NA	GUT_GENOME132205	MGYG-HGUT-02163	d__Archaea;p__Methanobacteriota;c__Methanobacteria;o__Methanobacteriales;f__Methanobacteriaceae;g__Methanobrevibacter_A;s__Methanobrevibacter_A smithii	ERS1444464	ERP019502	Kazakhstan	Asia
GUT_GENOME022016	CosteaPI_2017__SID713A009-11-90-0__bin.68	CIBIO	MAG	1104904	94	17369	32.11	84.4	0.8	0.01	0	99.8	99.5	18	NA	GUT_GENOME132205	MGYG-HGUT-02163	d__Archaea;p__Methanobacteriota;c__Methanobacteria;o__Methanobacteriales;f__Methanobacteriaceae;g__Methanobrevibacter_A;s__Methanobrevibacter_A smithii	ERS1444466	ERP019502	Kazakhstan	Asia
GUT_GENOME022135	CosteaPI_2017__SID713A013-11-0-0__bin.18	CIBIO	MAG	1576421	187	11929	31.74	95.94	0	0.01	0	0	0	16	NA	GUT_GENOME132205	MGYG-HGUT-02163	d__Archaea;p__Methanobacteriota;c__Methanobacteria;o__Methanobacteriales;f__Methanobacteriaceae;g__Methanobrevibacter_A;s__Methanobrevibacter_A smithii	ERS1444471	ERP019502	Kazakhstan	Asia
GUT_GENOME022256	CosteaPI_2017__SID713A014-11-90-0__bin.58	CIBIO	MAG	1482228	182	11564	31.81	96.4	0.8	0.01	0	0	0	20	NA	GUT_GENOME132205	MGYG-HGUT-02163	d__Archaea;p__Methanobacteriota;c__Methanobacteria;o__Methanobacteriales;f__Methanobacteriaceae;g__Methanobrevibacter_A;s__Methanobrevibacter_A smithii	ERS1444474	ERP019502	Kazakhstan	Asia
GUT_GENOME022400	CosteaPI_2017__SID713A023-11-90-0__bin.62	CIBIO	MAG	1577679	171	12801	58.94	93.41	2.42	0.01	86.55	0	0	19	NA	GUT_GENOME268463	MGYG-HGUT-04339	d__Archaea;p__Thermoplasmatota;c__Thermoplasmata;o__Methanomassiliicoccales;f__Methanomethylophilaceae;g__UBA71;s__	ERS1444480	ERP019502	Kazakhstan	Asia
GUT_GENOME023085	CosteaPI_2017__SID713A051-11-0-0__bin.102	CIBIO	MAG	1767803	19	176287	31.06	100	0	0.01	0	0	0	20	NA	GUT_GENOME132205	MGYG-HGUT-02163	d__Archaea;p__Methanobacteriota;c__Methanobacteria;o__Methanobacteriales;f__Methanobacteriaceae;g__Methanobrevibacter_A;s__Methanobrevibacter_A smithii	ERS1444505	ERP019502	Kazakhstan	Asia
GUT_GENOME023262	CosteaPI_2017__SID713A052-11-90-0__bin.91	CIBIO	MAG	957734	347	2864	32.67	66.4	0.04	0.09	0	0	0	3	NA	GUT_GENOME132205	MGYG-HGUT-02163	d__Archaea;p__Methanobacteriota;c__Methanobacteria;o__Methanobacteriales;f__Methanobacteriaceae;g__Methanobrevibacter_A;s__Methanobrevibacter_A smithii	ERS1444508	ERP019502	Kazakhstan	Asia
GUT_GENOME023479	CosteaPI_2017__SID713A056-11-90-0__bin.53	CIBIO	MAG	1714645	33	91987	31.14	99.2	0	0.01	0	99.8	99.5	20	NA	GUT_GENOME132205	MGYG-HGUT-02163	d__Archaea;p__Methanobacteriota;c__Methanobacteria;o__Methanobacteriales;f__Methanobacteriaceae;g__Methanobrevibacter_A;s__Methanobrevibacter_A smithii	ERS1444514	ERP019502	Kazakhstan	Asia
GUT_GENOME024240	CosteaPI_2017__SID713A084-11-90-0__bin.39	CIBIO	MAG	2835501	870	3666	32.35	87.87	2.08	0.09	0	0	0	20	NA	GUT_GENOME132205	MGYG-HGUT-02163	d__Archaea;p__Methanobacteriota;c__Methanobacteria;o__Methanobacteriales;f__Methanobacteriaceae;g__Methanobrevibacter_A;s__Methanobrevibacter_A smithii	ERS1444540	ERP019502	Kazakhstan	Asia
GUT_GENOME024578	CosteaPI_2017__SID713B003-11-90-0__bin.86	CIBIO	MAG	1507381	392	4277	31.91	87.27	0	0.01	0	0	0	17	NA	GUT_GENOME132205	MGYG-HGUT-02163	d__Archaea;p__Methanobacteriota;c__Methanobacteria;o__Methanobacteriales;f__Methanobacteriaceae;g__Methanobrevibacter_A;s__Methanobrevibacter_A smithii	ERS1444550	ERP019502	Kazakhstan	Asia
GUT_GENOME024961	CosteaPI_2017__SID713B016-11-90-0__bin.33	CIBIO	MAG	1306877	384	3892	31.72	70.49	3.78	0.1	0	0	0	14	NA	GUT_GENOME132205	MGYG-HGUT-02163	d__Archaea;p__Methanobacteriota;c__Methanobacteria;o__Methanobacteriales;f__Methanobacteriaceae;g__Methanobrevibacter_A;s__Methanobrevibacter_A smithii	ERS1444564	ERP019502	Kazakhstan	Asia
GUT_GENOME025584	CosteaPI_2017__SID713B040-11-90-0__bin.119	CIBIO	MAG	1140292	240	5612	32.31	75.47	0.8	0.01	0	0	0	14	NA	GUT_GENOME132205	MGYG-HGUT-02163	d__Archaea;p__Methanobacteriota;c__Methanobacteria;o__Methanobacteriales;f__Methanobacteriaceae;g__Methanobrevibacter_A;s__Methanobrevibacter_A smithii	ERS1444584	ERP019502	Kazakhstan	Asia
GUT_GENOME025919	CosteaPI_2017__SID713B046-11-90-0__bin.5	CIBIO	MAG	1493276	382	4561	58.5	79.27	2.02	0.07	0	0	0	20	NA	GUT_GENOME268463	MGYG-HGUT-04339	d__Archaea;p__Thermoplasmatota;c__Thermoplasmata;o__Methanomassiliicoccales;f__Methanomethylophilaceae;g__UBA71;s__	ERS1444594	ERP019502	Kazakhstan	Asia
GUT_GENOME025992	CosteaPI_2017__SID713B051-11-0-0__bin.40	CIBIO	MAG	1793006	59	43886	31.07	100	0	0.01	0	32.9	0	20	NA	GUT_GENOME132205	MGYG-HGUT-02163	d__Archaea;p__Methanobacteriota;c__Methanobacteria;o__Methanobacteriales;f__Methanobacteriaceae;g__Methanobrevibacter_A;s__Methanobrevibacter_A smithii	ERS1444597	ERP019502	Kazakhstan	Asia
GUT_GENOME026035	CosteaPI_2017__SID713B051-11-90-0__bin.39	CIBIO	MAG	1198813	346	3945	32.44	78.84	0.8	0.02	0	0	0	7	NA	GUT_GENOME132205	MGYG-HGUT-02163	d__Archaea;p__Methanobacteriota;c__Methanobacteria;o__Methanobacteriales;f__Methanobacteriaceae;g__Methanobrevibacter_A;s__Methanobrevibacter_A smithii	ERS1444598	ERP019502	Kazakhstan	Asia
GUT_GENOME026236	CosteaPI_2017__SID713B055-11-0-0__bin.97	CIBIO	MAG	1464256	347	5052	31.89	85.51	0.27	0.08	0	0	0	14	NA	GUT_GENOME132205	MGYG-HGUT-02163	d__Archaea;p__Methanobacteriota;c__Methanobacteria;o__Methanobacteriales;f__Methanobacteriaceae;g__Methanobrevibacter_A;s__Methanobrevibacter_A smithii	ERS1444603	ERP019502	Kazakhstan	Asia
GUT_GENOME026699	CosteaPI_2017__SID713B069-11-90-0__bin.14	CIBIO	MAG	1410941	330	5051	58.74	79.37	1.61	0.04	0	0	0	20	NA	GUT_GENOME268463	MGYG-HGUT-04339	d__Archaea;p__Thermoplasmatota;c__Thermoplasmata;o__Methanomassiliicoccales;f__Methanomethylophilaceae;g__UBA71;s__	ERS1444622	ERP019502	Kazakhstan	Asia
GUT_GENOME026824	CosteaPI_2017__SID713B072-11-90-0__bin.64	CIBIO	MAG	1324288	357	4369	32.24	81.51	0	0.01	0	0	0	12	NA	GUT_GENOME132205	MGYG-HGUT-02163	d__Archaea;p__Methanobacteriota;c__Methanobacteria;o__Methanobacteriales;f__Methanobacteriaceae;g__Methanobrevibacter_A;s__Methanobrevibacter_A smithii	ERS1444624	ERP019502	Kazakhstan	Asia
GUT_GENOME028362	ERR011120_bin.18	EBI	MAG	951400	244	4146	56.22	69.15	2.02	0	87.39	9.48	11.2	16	NA	GUT_GENOME143252	MGYG-HGUT-02456	d__Archaea;p__Thermoplasmatota;c__Thermoplasmata;o__Methanomassiliicoccales;f__Methanomethylophilaceae;g__Methanomethylophilus;s__Methanomethylophilus alvus	ERS006494	ERP000108	Denmark	Europe
GUT_GENOME028394	ERR011122_bin.4	EBI	MAG	968536	212	5261	55.85	65.36	0.81	0	0	99.8	99.13	19	NA	GUT_GENOME143252	MGYG-HGUT-02456	d__Archaea;p__Thermoplasmatota;c__Thermoplasmata;o__Methanomassiliicoccales;f__Methanomethylophilaceae;g__Methanomethylophilus;s__Methanomethylophilus alvus	ERS006494	ERP000108	Denmark	Europe
GUT_GENOME028414	ERR011123_bin.5	EBI	MAG	965769	215	4919	55.67	72.99	0	0	87.39	0	99.13	17	NA	GUT_GENOME143252	MGYG-HGUT-02456	d__Archaea;p__Thermoplasmatota;c__Thermoplasmata;o__Methanomassiliicoccales;f__Methanomethylophilaceae;g__Methanomethylophilus;s__Methanomethylophilus alvus	ERS006494	ERP000108	Denmark	Europe
GUT_GENOME029030	ERR011326_bin.10	EBI	MAG	1466596	142	13763	31.8	84.34	1.6	0	0	0	0	15	NA	GUT_GENOME132205	MGYG-HGUT-02163	d__Archaea;p__Methanobacteriota;c__Methanobacteria;o__Methanobacteriales;f__Methanobacteriaceae;g__Methanobrevibacter_A;s__Methanobrevibacter_A smithii	ERS006524	ERP000108	Spain	Europe
GUT_GENOME029117	ERR1018185_bin.2	EBI	MAG	1630928	70	35535	31.92	97.6	0.8	0.05	0	99.8	99.5	16	NA	GUT_GENOME014311	MGYG-HGUT-00522	d__Archaea;p__Methanobacteriota;c__Methanobacteria;o__Methanobacteriales;f__Methanobacteriaceae;g__Methanobrevibacter_A;s__	ERS848618	ERP012177	China	Asia
GUT_GENOME029172	ERR1018187_bin.40	EBI	MAG	1740390	40	68433	31.15	100	0	0.01	0	0	0	20	NA	GUT_GENOME132205	MGYG-HGUT-02163	d__Archaea;p__Methanobacteriota;c__Methanobacteria;o__Methanobacteriales;f__Methanobacteriaceae;g__Methanobrevibacter_A;s__Methanobrevibacter_A smithii	ERS848620	ERP012177	China	Asia
GUT_GENOME029369	ERR1018196_bin.63	EBI	MAG	1708656	43	55425	31.18	100	0	0.01	0	0	0	20	NA	GUT_GENOME132205	MGYG-HGUT-02163	d__Archaea;p__Methanobacteriota;c__Methanobacteria;o__Methanobacteriales;f__Methanobacteriaceae;g__Methanobrevibacter_A;s__Methanobrevibacter_A smithii	ERS848629	ERP012177	China	Asia
GUT_GENOME029865	ERR1018222_bin.27	EBI	MAG	1711967	59	42007	31.35	98.4	0.4	0.01	0	0	0	20	NA	GUT_GENOME132205	MGYG-HGUT-02163	d__Archaea;p__Methanobacteriota;c__Methanobacteria;o__Methanobacteriales;f__Methanobacteriaceae;g__Methanobrevibacter_A;s__Methanobrevibacter_A smithii	ERS848655	ERP012177	China	Asia
GUT_GENOME030002	ERR1018228_bin.38	EBI	MAG	1685075	101	25692	31.32	96.4	0	0.01	0	0	0	20	NA	GUT_GENOME132205	MGYG-HGUT-02163	d__Archaea;p__Methanobacteriota;c__Methanobacteria;o__Methanobacteriales;f__Methanobacteriaceae;g__Methanobrevibacter_A;s__Methanobrevibacter_A smithii	ERS848661	ERP012177	China	Asia
GUT_GENOME030764	ERR1018268_bin.59	EBI	MAG	1794901	14	320966	29.78	100	0	0	0	0	0	20	NA	GUT_GENOME263468	MGYG-HGUT-04283	d__Archaea;p__Methanobacteriota;c__Methanobacteria;o__Methanobacteriales;f__Methanobacteriaceae;g__Methanobrevibacter_A;s__Methanobrevibacter_A woesei	ERS848701	ERP012177	China	Asia
GUT_GENOME030862	ERR1018272_bin.9	EBI	MAG	1667056	57	54712	31.38	98.4	0	0.03	0	99.8	99.5	20	NA	GUT_GENOME132205	MGYG-HGUT-02163	d__Archaea;p__Methanobacteriota;c__Methanobacteria;o__Methanobacteriales;f__Methanobacteriaceae;g__Methanobrevibacter_A;s__Methanobrevibacter_A smithii	ERS848705	ERP012177	China	Asia
GUT_GENOME031107	ERR1018285_bin.46	EBI	MAG	1681929	40	61895	31.2	96.8	0	0.01	0	0	0	20	NA	GUT_GENOME132205	MGYG-HGUT-02163	d__Archaea;p__Methanobacteriota;c__Methanobacteria;o__Methanobacteriales;f__Methanobacteriaceae;g__Methanobrevibacter_A;s__Methanobrevibacter_A smithii	ERS848718	ERP012177	China	Asia
GUT_GENOME031211	ERR1018291_bin.34	EBI	MAG	1871204	55	50994	31.25	100	0.4	0.01	0	52.47	0	20	NA	GUT_GENOME132205	MGYG-HGUT-02163	d__Archaea;p__Methanobacteriota;c__Methanobacteria;o__Methanobacteriales;f__Methanobacteriaceae;g__Methanobrevibacter_A;s__Methanobrevibacter_A smithii	ERS848724	ERP012177	China	Asia
GUT_GENOME031327	ERR1018298_bin.5	EBI	MAG	1489913	205	9746	32.23	90.74	0	0.04	0	99.8	99.5	11	NA	GUT_GENOME014311	MGYG-HGUT-00522	d__Archaea;p__Methanobacteriota;c__Methanobacteria;o__Methanobacteriales;f__Methanobacteriaceae;g__Methanobrevibacter_A;s__	ERS848731	ERP012177	China	Asia
GUT_GENOME031842	ERR1190545_bin.21	EBI	MAG	1748028	21	198193	31.12	100	0	0.01	0	0	0	20	NA	GUT_GENOME132205	MGYG-HGUT-02163	d__Archaea;p__Methanobacteriota;c__Methanobacteria;o__Methanobacteriales;f__Methanobacteriaceae;g__Methanobrevibacter_A;s__Methanobrevibacter_A smithii	ERS1015620	ERP013562	China	Asia
GUT_GENOME033967	ERR1190661_bin.6	EBI	MAG	1666320	123	20598	31.41	92.8	0	0.1	0	99.8	99.5	20	NA	GUT_GENOME132205	MGYG-HGUT-02163	d__Archaea;p__Methanobacteriota;c__Methanobacteria;o__Methanobacteriales;f__Methanobacteriaceae;g__Methanobrevibacter_A;s__Methanobrevibacter_A smithii	ERS1015736	ERP013562	China	Asia
GUT_GENOME037337	ERR1190927_bin.71	EBI	MAG	1829084	20	194291	31.11	100	0	0	0	0	0	20	NA	GUT_GENOME132205	MGYG-HGUT-02163	d__Archaea;p__Methanobacteriota;c__Methanobacteria;o__Methanobacteriales;f__Methanobacteriaceae;g__Methanobrevibacter_A;s__Methanobrevibacter_A smithii	ERS1016002	ERP013563	China	Asia
GUT_GENOME039517	ERR1293646_bin.13	EBI	MAG	1776937	25	154633	31.11	100	0	0.02	0	0	0	20	NA	GUT_GENOME132205	MGYG-HGUT-02163	d__Archaea;p__Methanobacteriota;c__Methanobacteria;o__Methanobacteriales;f__Methanobacteriaceae;g__Methanobrevibacter_A;s__Methanobrevibacter_A smithii	ERS1066671	ERP013933	United States	North America
GUT_GENOME039530	ERR1293647_bin.7	EBI	MAG	1793759	28	156145	31.1	100	0	0.01	0	0	0	20	NA	GUT_GENOME132205	MGYG-HGUT-02163	d__Archaea;p__Methanobacteriota;c__Methanobacteria;o__Methanobacteriales;f__Methanobacteriaceae;g__Methanobrevibacter_A;s__Methanobrevibacter_A smithii	ERS1066671	ERP013933	United States	North America
GUT_GENOME039533	ERR1293648_bin.10	EBI	MAG	1766870	35	68520	31.12	100	0	0	0	0	0	20	NA	GUT_GENOME132205	MGYG-HGUT-02163	d__Archaea;p__Methanobacteriota;c__Methanobacteria;o__Methanobacteriales;f__Methanobacteriaceae;g__Methanobrevibacter_A;s__Methanobrevibacter_A smithii	ERS1066671	ERP013933	United States	North America
GUT_GENOME039548	ERR1293649_bin.3	EBI	MAG	1750372	33	67799	31.14	100	0	0.01	0	0	0	20	NA	GUT_GENOME132205	MGYG-HGUT-02163	d__Archaea;p__Methanobacteriota;c__Methanobacteria;o__Methanobacteriales;f__Methanobacteriaceae;g__Methanobrevibacter_A;s__Methanobrevibacter_A smithii	ERS1066671	ERP013933	United States	North America
GUT_GENOME040374	ERR1293750_bin.22	EBI	MAG	1783456	133	18484	31.25	97.73	0	0.08	0	0	0	20	NA	GUT_GENOME132205	MGYG-HGUT-02163	d__Archaea;p__Methanobacteriota;c__Methanobacteria;o__Methanobacteriales;f__Methanobacteriaceae;g__Methanobrevibacter_A;s__Methanobrevibacter_A smithii	ERS1066697	ERP013933	United States	North America
GUT_GENOME040387	ERR1293751_bin.11	EBI	MAG	1897310	174	15769	31.44	97.6	1.07	0.15	0	99.8	99.5	16	NA	GUT_GENOME132205	MGYG-HGUT-02163	d__Archaea;p__Methanobacteriota;c__Methanobacteria;o__Methanobacteriales;f__Methanobacteriaceae;g__Methanobrevibacter_A;s__Methanobrevibacter_A smithii	ERS1066697	ERP013933	United States	North America
GUT_GENOME040406	ERR1293752_bin.18	EBI	MAG	1786732	153	15581	31.19	96.8	0	0.16	0	0	0	20	NA	GUT_GENOME132205	MGYG-HGUT-02163	d__Archaea;p__Methanobacteriota;c__Methanobacteria;o__Methanobacteriales;f__Methanobacteriaceae;g__Methanobrevibacter_A;s__Methanobrevibacter_A smithii	ERS1066697	ERP013933	United States	North America
GUT_GENOME040421	ERR1293753_bin.21	EBI	MAG	1847309	138	19354	31.27	97.2	0	0.09	0	99.8	99.5	20	NA	GUT_GENOME132205	MGYG-HGUT-02163	d__Archaea;p__Methanobacteriota;c__Methanobacteria;o__Methanobacteriales;f__Methanobacteriaceae;g__Methanobrevibacter_A;s__Methanobrevibacter_A smithii	ERS1066697	ERP013933	United States	North America
GUT_GENOME040899	ERR1293807_bin.2	EBI	MAG	768717	207	3895	32.56	61.05	0	0	0	0	0	6	NA	GUT_GENOME132205	MGYG-HGUT-02163	d__Archaea;p__Methanobacteriota;c__Methanobacteria;o__Methanobacteriales;f__Methanobacteriaceae;g__Methanobrevibacter_A;s__Methanobrevibacter_A smithii	ERS1066711	ERP013933	United States	North America
GUT_GENOME040931	ERR1293809_bin.9	EBI	MAG	1095966	289	3962	32.2	65.62	0	0.36	0	0	0	11	NA	GUT_GENOME132205	MGYG-HGUT-02163	d__Archaea;p__Methanobacteriota;c__Methanobacteria;o__Methanobacteriales;f__Methanobacteriaceae;g__Methanobrevibacter_A;s__Methanobrevibacter_A smithii	ERS1066711	ERP013933	United States	North America
GUT_GENOME041778	ERR1293914_bin.23	EBI	MAG	1820770	134	19451	30.65	100	0	0.11	0	99.8	99.5	20	NA	GUT_GENOME143185	MGYG-HGUT-02446	d__Archaea;p__Methanobacteriota;c__Methanobacteria;o__Methanobacteriales;f__Methanobacteriaceae;g__Methanobrevibacter_A;s__Methanobrevibacter_A smithii_A	ERS1066738	ERP013933	United States	North America
GUT_GENOME041786	ERR1293915_bin.19	EBI	MAG	1791470	139	16898	30.72	97.2	0.4	0.1	0	99.8	99.5	19	NA	GUT_GENOME143185	MGYG-HGUT-02446	d__Archaea;p__Methanobacteriota;c__Methanobacteria;o__Methanobacteriales;f__Methanobacteriaceae;g__Methanobrevibacter_A;s__Methanobrevibacter_A smithii_A	ERS1066738	ERP013933	United States	North America
GUT_GENOME041800	ERR1293916_bin.2	EBI	MAG	1830885	157	16615	30.8	100	0	0.12	0	99.8	99.5	20	NA	GUT_GENOME143185	MGYG-HGUT-02446	d__Archaea;p__Methanobacteriota;c__Methanobacteria;o__Methanobacteriales;f__Methanobacteriaceae;g__Methanobrevibacter_A;s__Methanobrevibacter_A smithii_A	ERS1066738	ERP013933	United States	North America
GUT_GENOME041810	ERR1293917_bin.7	EBI	MAG	1794816	144	19664	30.65	98.8	0	0.09	0	99.8	99.5	20	NA	GUT_GENOME143185	MGYG-HGUT-02446	d__Archaea;p__Methanobacteriota;c__Methanobacteria;o__Methanobacteriales;f__Methanobacteriaceae;g__Methanobrevibacter_A;s__Methanobrevibacter_A smithii_A	ERS1066738	ERP013933	United States	North America
GUT_GENOME043902	ERR1305891_bin.17	EBI	MAG	1664818	277	7715	30.77	88	0	0.67	0	0	10.7	19	NA	GUT_GENOME143185	MGYG-HGUT-02446	d__Archaea;p__Methanobacteriota;c__Methanobacteria;o__Methanobacteriales;f__Methanobacteriaceae;g__Methanobrevibacter_A;s__Methanobrevibacter_A smithii_A	ERS1076030	ERP014480	Denmark	Europe
GUT_GENOME044029	ERR1305895_bin.17	EBI	MAG	748141	204	3989	57.03	55.36	0.81	1.64	0	0	0	15	NA	GUT_GENOME143252	MGYG-HGUT-02456	d__Archaea;p__Thermoplasmatota;c__Thermoplasmata;o__Methanomassiliicoccales;f__Methanomethylophilaceae;g__Methanomethylophilus;s__Methanomethylophilus alvus	ERS1076046	ERP014480	Denmark	Europe
GUT_GENOME044077	ERR1305896_bin.24	EBI	MAG	1404127	38	66650	56.46	82.26	0	0.04	87.39	99.8	99.13	20	NA	GUT_GENOME143252	MGYG-HGUT-02456	d__Archaea;p__Thermoplasmatota;c__Thermoplasmata;o__Methanomassiliicoccales;f__Methanomethylophilaceae;g__Methanomethylophilus;s__Methanomethylophilus alvus	ERS1076038	ERP014480	Denmark	Europe
GUT_GENOME044172	ERR1305899_bin.45	EBI	MAG	1363431	19	134706	42.46	70.56	0.81	0.01	92.44	99.86	99.03	17	NA	GUT_GENOME044241	MGYG-HGUT-00897	d__Archaea;p__Thermoplasmatota;c__Thermoplasmata;o__Methanomassiliicoccales;f__Methanomassiliicoccaceae;g__Methanomassiliicoccus_A;s__	ERS1076050	ERP014480	Denmark	Europe
GUT_GENOME044226	ERR1305900_bin.87	EBI	MAG	1695482	92	25739	42.82	97.72	0	0.15	92.44	99.86	99.03	20	NA	GUT_GENOME044241	MGYG-HGUT-00897	d__Archaea;p__Thermoplasmatota;c__Thermoplasmata;o__Methanomassiliicoccales;f__Methanomassiliicoccaceae;g__Methanomassiliicoccus_A;s__	ERS1076059	ERP014480	Denmark	Europe
GUT_GENOME044241	ERR1305901_bin.111	EBI	MAG	1739504	27	117927	42.72	97.98	0	0.01	92.44	99.86	99.03	20	NA	GUT_GENOME044241	MGYG-HGUT-00897	d__Archaea;p__Thermoplasmatota;c__Thermoplasmata;o__Methanomassiliicoccales;f__Methanomassiliicoccaceae;g__Methanomassiliicoccus_A;s__	ERS1076051	ERP014480	Denmark	Europe
GUT_GENOME046615	ERR1620331_bin.51	EBI	MAG	1736672	35	86626	31.24	99.2	0	0.01	0	0	0	20	NA	GUT_GENOME132205	MGYG-HGUT-02163	d__Archaea;p__Methanobacteriota;c__Methanobacteria;o__Methanobacteriales;f__Methanobacteriaceae;g__Methanobrevibacter_A;s__Methanobrevibacter_A smithii	ERS1343393	ERP017091	China	Asia
GUT_GENOME047646	ERR1912967_bin.8	EBI	MAG	1290459	299	4853	32.14	76.13	0	0.03	0	0	0	13	NA	GUT_GENOME132205	MGYG-HGUT-02163	d__Archaea;p__Methanobacteriota;c__Methanobacteria;o__Methanobacteriales;f__Methanobacteriaceae;g__Methanobrevibacter_A;s__Methanobrevibacter_A smithii	ERS1647289	ERP019674	Germany	Europe
GUT_GENOME047661	ERR1912968_bin.4	EBI	MAG	1392727	313	4892	32.05	82.58	0.19	0.05	0	0	0	5	NA	GUT_GENOME132205	MGYG-HGUT-02163	d__Archaea;p__Methanobacteriota;c__Methanobacteria;o__Methanobacteriales;f__Methanobacteriaceae;g__Methanobrevibacter_A;s__Methanobrevibacter_A smithii	ERS1647289	ERP019674	Germany	Europe
GUT_GENOME047676	ERR1912969_bin.35	EBI	MAG	1407566	305	5209	32.03	81.67	0	0.02	0	0	0	7	NA	GUT_GENOME132205	MGYG-HGUT-02163	d__Archaea;p__Methanobacteriota;c__Methanobacteria;o__Methanobacteriales;f__Methanobacteriaceae;g__Methanobrevibacter_A;s__Methanobrevibacter_A smithii	ERS1647289	ERP019674	Germany	Europe
GUT_GENOME047694	ERR1912970_bin.5	EBI	MAG	1333746	303	4917	32	83.11	0	0.05	0	0	0	10	NA	GUT_GENOME132205	MGYG-HGUT-02163	d__Archaea;p__Methanobacteriota;c__Methanobacteria;o__Methanobacteriales;f__Methanobacteriaceae;g__Methanobrevibacter_A;s__Methanobrevibacter_A smithii	ERS1647289	ERP019674	Germany	Europe
GUT_GENOME047914	ERR1912989_bin.42	EBI	MAG	1528533	280	6533	32.01	85.05	0.8	0.09	0	0	0	14	NA	GUT_GENOME132205	MGYG-HGUT-02163	d__Archaea;p__Methanobacteriota;c__Methanobacteria;o__Methanobacteriales;f__Methanobacteriaceae;g__Methanobrevibacter_A;s__Methanobrevibacter_A smithii	ERS1647330	ERP019674	Germany	Europe
GUT_GENOME048279	ERR1913025_bin.9	EBI	MAG	2040352	390	6294	31.9	88	0	0.51	0	15.91	0	20	NA	GUT_GENOME132205	MGYG-HGUT-02163	d__Archaea;p__Methanobacteriota;c__Methanobacteria;o__Methanobacteriales;f__Methanobacteriaceae;g__Methanobrevibacter_A;s__Methanobrevibacter_A smithii	ERS1647312	ERP019674	Germany	Europe
GUT_GENOME048293	ERR1913026_bin.30	EBI	MAG	2563883	477	6439	33.15	85.2	1.28	0.61	0	99.8	99.5	20	NA	GUT_GENOME132205	MGYG-HGUT-02163	d__Archaea;p__Methanobacteriota;c__Methanobacteria;o__Methanobacteriales;f__Methanobacteriaceae;g__Methanobrevibacter_A;s__Methanobrevibacter_A smithii	ERS1647312	ERP019674	Germany	Europe
GUT_GENOME048310	ERR1913027_bin.29	EBI	MAG	1604606	292	6476	31.95	83.14	0.04	0.32	0	0	0	16	NA	GUT_GENOME132205	MGYG-HGUT-02163	d__Archaea;p__Methanobacteriota;c__Methanobacteria;o__Methanobacteriales;f__Methanobacteriaceae;g__Methanobrevibacter_A;s__Methanobrevibacter_A smithii	ERS1647312	ERP019674	Germany	Europe
GUT_GENOME048336	ERR1913028_bin.8	EBI	MAG	1644934	306	6281	31.82	83.94	2	0.63	93.28	22.41	99.5	16	NA	GUT_GENOME132205	MGYG-HGUT-02163	d__Archaea;p__Methanobacteriota;c__Methanobacteria;o__Methanobacteriales;f__Methanobacteriaceae;g__Methanobrevibacter_A;s__Methanobrevibacter_A smithii	ERS1647312	ERP019674	Germany	Europe
GUT_GENOME048380	ERR1913030_bin.7	EBI	MAG	1495689	275	6638	32.33	89.81	0	0.11	0	0	0	17	NA	GUT_GENOME132205	MGYG-HGUT-02163	d__Archaea;p__Methanobacteriota;c__Methanobacteria;o__Methanobacteriales;f__Methanobacteriaceae;g__Methanobrevibacter_A;s__Methanobrevibacter_A smithii	ERS1647321	ERP019674	Germany	Europe
GUT_GENOME048397	ERR1913031_bin.40	EBI	MAG	1514654	345	4872	32.59	81.01	0.98	0.14	0	0	0	15	NA	GUT_GENOME132205	MGYG-HGUT-02163	d__Archaea;p__Methanobacteriota;c__Methanobacteria;o__Methanobacteriales;f__Methanobacteriaceae;g__Methanobrevibacter_A;s__Methanobrevibacter_A smithii	ERS1647321	ERP019674	Germany	Europe
GUT_GENOME048682	ERR1913064_bin.21	EBI	MAG	1544826	278	6743	32.2	85.94	0.8	0.15	0	99.8	99.5	14	NA	GUT_GENOME132205	MGYG-HGUT-02163	d__Archaea;p__Methanobacteriota;c__Methanobacteria;o__Methanobacteriales;f__Methanobacteriaceae;g__Methanobrevibacter_A;s__Methanobrevibacter_A smithii	ERS1647295	ERP019674	Germany	Europe
GUT_GENOME048694	ERR1913065_bin.21	EBI	MAG	1544826	278	6743	32.2	85.94	0.8	0.15	0	99.8	99.5	14	NA	GUT_GENOME132205	MGYG-HGUT-02163	d__Archaea;p__Methanobacteriota;c__Methanobacteria;o__Methanobacteriales;f__Methanobacteriaceae;g__Methanobrevibacter_A;s__Methanobrevibacter_A smithii	ERS1647295	ERP019674	Germany	Europe
GUT_GENOME048709	ERR1913066_bin.29	EBI	MAG	1709602	292	7095	32.45	89.84	0	0.13	0	99.8	99.5	15	NA	GUT_GENOME132205	MGYG-HGUT-02163	d__Archaea;p__Methanobacteriota;c__Methanobacteria;o__Methanobacteriales;f__Methanobacteriaceae;g__Methanobrevibacter_A;s__Methanobrevibacter_A smithii	ERS1647295	ERP019674	Germany	Europe
GUT_GENOME048719	ERR1913067_bin.1	EBI	MAG	1695598	303	6631	32.27	89.73	0	0.14	0	0	0	16	NA	GUT_GENOME132205	MGYG-HGUT-02163	d__Archaea;p__Methanobacteriota;c__Methanobacteria;o__Methanobacteriales;f__Methanobacteriaceae;g__Methanobrevibacter_A;s__Methanobrevibacter_A smithii	ERS1647295	ERP019674	Germany	Europe
GUT_GENOME048728	ERR1913068_bin.13	EBI	MAG	1560378	267	7522	32.15	90.8	0.13	0.13	0	99.8	99.5	19	NA	GUT_GENOME132205	MGYG-HGUT-02163	d__Archaea;p__Methanobacteriota;c__Methanobacteria;o__Methanobacteriales;f__Methanobacteriaceae;g__Methanobrevibacter_A;s__Methanobrevibacter_A smithii	ERS1647295	ERP019674	Germany	Europe
GUT_GENOME050330	ERR209091_bin.1	EBI	MAG	666178	178	3889	55.32	55.25	0	NA	87.39	0	99.13	14	NA	GUT_GENOME143252	MGYG-HGUT-02456	d__Archaea;p__Thermoplasmatota;c__Thermoplasmata;o__Methanomassiliicoccales;f__Methanomethylophilaceae;g__Methanomethylophilus;s__Methanomethylophilus alvus	ERS199011	ERP002061	Denmark	Europe
GUT_GENOME051178	ERR209427_bin.28	EBI	MAG	1205781	101	19031	31.96	81.33	0.8	0.17	0	10.22	99.5	12	NA	GUT_GENOME132205	MGYG-HGUT-02163	d__Archaea;p__Methanobacteriota;c__Methanobacteria;o__Methanobacteriales;f__Methanobacteriaceae;g__Methanobrevibacter_A;s__Methanobrevibacter_A smithii	ERS199126	ERP002061	Denmark	Europe
GUT_GENOME052130	ERR209630_bin.4	EBI	MAG	1121313	293	3929	31.52	63.47	0.8	0.13	0	0	0	6	NA	GUT_GENOME132205	MGYG-HGUT-02163	d__Archaea;p__Methanobacteriota;c__Methanobacteria;o__Methanobacteriales;f__Methanobacteriaceae;g__Methanobrevibacter_A;s__Methanobrevibacter_A smithii	ERS199242	ERP002061	Spain	Europe
GUT_GENOME052133	ERR209631_bin.5	EBI	MAG	835249	255	3363	32.35	54.95	0	1.53	0	0	0	9	NA	GUT_GENOME132205	MGYG-HGUT-02163	d__Archaea;p__Methanobacteriota;c__Methanobacteria;o__Methanobacteriales;f__Methanobacteriaceae;g__Methanobrevibacter_A;s__Methanobrevibacter_A smithii	ERS199242	ERP002061	Spain	Europe
GUT_GENOME052135	ERR209633_bin.2	EBI	MAG	1321811	277	5426	31.34	80.74	0.84	0.55	0	24.85	0	8	NA	GUT_GENOME132205	MGYG-HGUT-02163	d__Archaea;p__Methanobacteriota;c__Methanobacteria;o__Methanobacteriales;f__Methanobacteriaceae;g__Methanobrevibacter_A;s__Methanobrevibacter_A smithii	ERS199243	ERP002061	Spain	Europe
GUT_GENOME052138	ERR209634_bin.4	EBI	MAG	1328479	271	5724	31.45	86.58	1.73	0.64	0	22.61	20.47	10	NA	GUT_GENOME132205	MGYG-HGUT-02163	d__Archaea;p__Methanobacteriota;c__Methanobacteria;o__Methanobacteriales;f__Methanobacteriaceae;g__Methanobrevibacter_A;s__Methanobrevibacter_A smithii	ERS199243	ERP002061	Spain	Europe
GUT_GENOME052752	ERR209753_bin.1	EBI	MAG	1229218	284	4675	32.33	74.16	1.89	0	0	0	0	9	NA	GUT_GENOME132205	MGYG-HGUT-02163	d__Archaea;p__Methanobacteriota;c__Methanobacteria;o__Methanobacteriales;f__Methanobacteriaceae;g__Methanobrevibacter_A;s__Methanobrevibacter_A smithii	ERS199315	ERP002061	Spain	Europe
GUT_GENOME052919	ERR209778_bin.9	EBI	MAG	845236	8	222705	31.35	54.4	0	0.01	0	0	0	15	NA	GUT_GENOME132205	MGYG-HGUT-02163	d__Archaea;p__Methanobacteriota;c__Methanobacteria;o__Methanobacteriales;f__Methanobacteriaceae;g__Methanobrevibacter_A;s__Methanobrevibacter_A smithii	ERS199329	ERP002061	Spain	Europe
GUT_GENOME052922	ERR209779_bin.5	EBI	MAG	1101542	10	219132	31.29	60	0	0.02	0	0	0	18	NA	GUT_GENOME132205	MGYG-HGUT-02163	d__Archaea;p__Methanobacteriota;c__Methanobacteria;o__Methanobacteriales;f__Methanobacteriaceae;g__Methanobrevibacter_A;s__Methanobrevibacter_A smithii	ERS199329	ERP002061	Spain	Europe
GUT_GENOME052932	ERR209782_bin.8	EBI	MAG	1727466	62	44241	31.19	99.73	0	0.04	0	99.8	74.35	20	NA	GUT_GENOME132205	MGYG-HGUT-02163	d__Archaea;p__Methanobacteriota;c__Methanobacteria;o__Methanobacteriales;f__Methanobacteriaceae;g__Methanobrevibacter_A;s__Methanobrevibacter_A smithii	ERS199331	ERP002061	Spain	Europe
GUT_GENOME053189	ERR209831_bin.3	EBI	MAG	1645244	214	11033	31.1	90.27	1.6	0.22	0	49.63	33.48	17	NA	GUT_GENOME132205	MGYG-HGUT-02163	d__Archaea;p__Methanobacteriota;c__Methanobacteria;o__Methanobacteriales;f__Methanobacteriaceae;g__Methanobrevibacter_A;s__Methanobrevibacter_A smithii	ERS199358	ERP002061	Spain	Europe
GUT_GENOME053306	ERR209869_bin.26	EBI	MAG	1927905	141	26174	30.86	99.2	1.04	0.07	0	99.8	99.5	20	NA	GUT_GENOME132205	MGYG-HGUT-02163	d__Archaea;p__Methanobacteriota;c__Methanobacteria;o__Methanobacteriales;f__Methanobacteriaceae;g__Methanobrevibacter_A;s__Methanobrevibacter_A smithii	ERS199381	ERP002061	Spain	Europe
GUT_GENOME053669	ERR321095_bin.24	EBI	MAG	971546	247	4179	56.09	69.15	2.02	0	87.39	9.48	11.2	17	NA	GUT_GENOME143252	MGYG-HGUT-02456	d__Archaea;p__Thermoplasmatota;c__Thermoplasmata;o__Methanomassiliicoccales;f__Methanomethylophilaceae;g__Methanomethylophilus;s__Methanomethylophilus alvus	ERS328727	ERP003612	Denmark	Europe
GUT_GENOME053694	ERR321097_bin.1	EBI	MAG	985454	214	5262	55.72	65.36	0.81	0	0	99.8	99.13	19	NA	GUT_GENOME143252	MGYG-HGUT-02456	d__Archaea;p__Thermoplasmatota;c__Thermoplasmata;o__Methanomassiliicoccales;f__Methanomethylophilaceae;g__Methanomethylophilus;s__Methanomethylophilus alvus	ERS328727	ERP003612	Denmark	Europe
GUT_GENOME053708	ERR321098_bin.17	EBI	MAG	963538	214	4919	55.67	72.99	0	0	87.39	0	99.13	17	NA	GUT_GENOME143252	MGYG-HGUT-02456	d__Archaea;p__Thermoplasmatota;c__Thermoplasmata;o__Methanomassiliicoccales;f__Methanomethylophilaceae;g__Methanomethylophilus;s__Methanomethylophilus alvus	ERS328727	ERP003612	Denmark	Europe
GUT_GENOME055436	ERR414243_bin.45	EBI	MAG	1589642	76	35677	31.49	98.13	0.86	0.03	0	99.8	99.5	20	NA	GUT_GENOME132205	MGYG-HGUT-02163	d__Archaea;p__Methanobacteriota;c__Methanobacteria;o__Methanobacteriales;f__Methanobacteriaceae;g__Methanobrevibacter_A;s__Methanobrevibacter_A smithii	ERS396304	ERP004605	Denmark	Europe
GUT_GENOME055714	ERR414257_bin.33	EBI	MAG	1874470	282	8231	31.02	90.53	0.8	0.51	0	99.8	99.5	16	NA	GUT_GENOME143185	MGYG-HGUT-02446	d__Archaea;p__Methanobacteriota;c__Methanobacteria;o__Methanobacteriales;f__Methanobacteriaceae;g__Methanobrevibacter_A;s__Methanobrevibacter_A smithii_A	ERS396316	ERP004605	Denmark	Europe
GUT_GENOME055830	ERR414266_bin.29	EBI	MAG	1691150	119	27081	41.48	95.56	1.13	0.07	92.44	99.86	99.03	19	NA	GUT_GENOME132202	MGYG-HGUT-02160	d__Archaea;p__Thermoplasmatota;c__Thermoplasmata;o__Methanomassiliicoccales;f__Methanomassiliicoccaceae;g__Methanomassiliicoccus_A;s__Methanomassiliicoccus_A intestinalis	ERS396323	ERP004605	Denmark	Europe
GUT_GENOME056822	ERR414339_bin.2	EBI	MAG	1327296	195	8957	31.92	86.09	0.8	0.2	0	0	0	15	NA	GUT_GENOME132205	MGYG-HGUT-02163	d__Archaea;p__Methanobacteriota;c__Methanobacteria;o__Methanobacteriales;f__Methanobacteriaceae;g__Methanobrevibacter_A;s__Methanobrevibacter_A smithii	ERS396390	ERP004605	Denmark	Europe
GUT_GENOME057011	ERR414347_bin.4	EBI	MAG	1810615	50	73705	41.47	97.98	0	0.02	92.44	99.86	99.03	20	NA	GUT_GENOME132202	MGYG-HGUT-02160	d__Archaea;p__Thermoplasmatota;c__Thermoplasmata;o__Methanomassiliicoccales;f__Methanomassiliicoccaceae;g__Methanomassiliicoccus_A;s__Methanomassiliicoccus_A intestinalis	ERS396398	ERP004605	Denmark	Europe
GUT_GENOME057256	ERR414360_bin.18	EBI	MAG	1179613	299	4233	32.1	72.46	0.8	0.17	0	0	0	8	NA	GUT_GENOME132205	MGYG-HGUT-02163	d__Archaea;p__Methanobacteriota;c__Methanobacteria;o__Methanobacteriales;f__Methanobacteriaceae;g__Methanobrevibacter_A;s__Methanobrevibacter_A smithii	ERS396410	ERP004605	Spain	Europe
GUT_GENOME057306	ERR414361_bin.53	EBI	MAG	1190310	253	5447	32.34	72.8	1.13	0.2	0	0	0	15	NA	GUT_GENOME132205	MGYG-HGUT-02163	d__Archaea;p__Methanobacteriota;c__Methanobacteria;o__Methanobacteriales;f__Methanobacteriaceae;g__Methanobrevibacter_A;s__Methanobrevibacter_A smithii	ERS396411	ERP004605	Spain	Europe
GUT_GENOME057805	ERR505083_bin.62	EBI	MAG	1732052	19	156186	31.04	100	0	0.01	0	0	0	20	NA	GUT_GENOME132205	MGYG-HGUT-02163	d__Archaea;p__Methanobacteriota;c__Methanobacteria;o__Methanobacteriales;f__Methanobacteriaceae;g__Methanobrevibacter_A;s__Methanobrevibacter_A smithii	ERS433542	ERP005558	Australia	Oceania
GUT_GENOME057829	ERR505084_bin.37	EBI	MAG	1701272	14	202129	31.13	100	0	0.01	0	0	0	20	NA	GUT_GENOME132205	MGYG-HGUT-02163	d__Archaea;p__Methanobacteriota;c__Methanobacteria;o__Methanobacteriales;f__Methanobacteriaceae;g__Methanobrevibacter_A;s__Methanobrevibacter_A smithii	ERS433543	ERP005558	Australia	Oceania
GUT_GENOME057858	ERR505085_bin.15	EBI	MAG	1485559	9	222632	31.06	88	0	0	0	0	0	20	NA	GUT_GENOME132205	MGYG-HGUT-02163	d__Archaea;p__Methanobacteriota;c__Methanobacteria;o__Methanobacteriales;f__Methanobacteriaceae;g__Methanobrevibacter_A;s__Methanobrevibacter_A smithii	ERS433544	ERP005558	Australia	Oceania
GUT_GENOME057915	ERR505086_bin.44	EBI	MAG	1703619	11	222064	31.06	100	0	0.01	0	0	0	20	NA	GUT_GENOME132205	MGYG-HGUT-02163	d__Archaea;p__Methanobacteriota;c__Methanobacteria;o__Methanobacteriales;f__Methanobacteriaceae;g__Methanobrevibacter_A;s__Methanobrevibacter_A smithii	ERS433545	ERP005558	Australia	Oceania
GUT_GENOME057995	ERR505089_bin.52	EBI	MAG	1776657	26	121290	31.05	100	0	0	0	0	99.5	20	NA	GUT_GENOME132205	MGYG-HGUT-02163	d__Archaea;p__Methanobacteriota;c__Methanobacteria;o__Methanobacteriales;f__Methanobacteriaceae;g__Methanobrevibacter_A;s__Methanobrevibacter_A smithii	ERS433548	ERP005558	Australia	Oceania
GUT_GENOME058005	ERR505090_bin.17	EBI	MAG	1794927	16	224565	30.95	100	0	0.01	0	0	0	20	NA	GUT_GENOME132205	MGYG-HGUT-02163	d__Archaea;p__Methanobacteriota;c__Methanobacteria;o__Methanobacteriales;f__Methanobacteriaceae;g__Methanobrevibacter_A;s__Methanobrevibacter_A smithii	ERS433549	ERP005558	Australia	Oceania
GUT_GENOME058117	ERR505097_bin.23	EBI	MAG	1660324	146	18961	31.18	98.4	0.58	0.04	0	0	0	14	NA	GUT_GENOME132205	MGYG-HGUT-02163	d__Archaea;p__Methanobacteriota;c__Methanobacteria;o__Methanobacteriales;f__Methanobacteriaceae;g__Methanobrevibacter_A;s__Methanobrevibacter_A smithii	ERS433556	ERP005558	Australia	Oceania
GUT_GENOME058140	ERR505098_bin.48	EBI	MAG	1664556	14	175360	31.24	97.6	0	0.01	0	71.16	6.69	18	NA	GUT_GENOME132205	MGYG-HGUT-02163	d__Archaea;p__Methanobacteriota;c__Methanobacteria;o__Methanobacteriales;f__Methanobacteriaceae;g__Methanobrevibacter_A;s__Methanobrevibacter_A smithii	ERS433557	ERP005558	Australia	Oceania
GUT_GENOME058172	ERR505101_bin.13	EBI	MAG	1633281	95	22312	31.27	98.93	0.48	0.11	0	49.36	0	19	NA	GUT_GENOME132205	MGYG-HGUT-02163	d__Archaea;p__Methanobacteriota;c__Methanobacteria;o__Methanobacteriales;f__Methanobacteriaceae;g__Methanobrevibacter_A;s__Methanobrevibacter_A smithii	ERS433560	ERP005558	Australia	Oceania
GUT_GENOME059256	ERR525771_bin.12	EBI	MAG	1470637	100	21905	31.8	93.73	0	0.02	0	99.8	99.5	20	NA	GUT_GENOME132205	MGYG-HGUT-02163	d__Archaea;p__Methanobacteriota;c__Methanobacteria;o__Methanobacteriales;f__Methanobacteriaceae;g__Methanobrevibacter_A;s__Methanobrevibacter_A smithii	ERS473106	ERP005989	Denmark	Europe
GUT_GENOME060185	ERR525851_bin.48	EBI	MAG	963066	261	3934	32.58	63.23	0	0.82	0	0	0	9	NA	GUT_GENOME132205	MGYG-HGUT-02163	d__Archaea;p__Methanobacteriota;c__Methanobacteria;o__Methanobacteriales;f__Methanobacteriaceae;g__Methanobrevibacter_A;s__Methanobrevibacter_A smithii	ERS473186	ERP005989	Denmark	Europe
GUT_GENOME060633	ERR525889_bin.10	EBI	MAG	869169	221	4146	56.58	65.9	0	0.1	87.39	0	0	17	NA	GUT_GENOME143252	MGYG-HGUT-02456	d__Archaea;p__Thermoplasmatota;c__Thermoplasmata;o__Methanomassiliicoccales;f__Methanomethylophilaceae;g__Methanomethylophilus;s__Methanomethylophilus alvus	ERS473224	ERP005989	Denmark	Europe
GUT_GENOME060823	ERR525903_bin.46	EBI	MAG	1673295	200	11341	31.64	94.93	0.8	0.06	0	0	0	20	NA	GUT_GENOME132205	MGYG-HGUT-02163	d__Archaea;p__Methanobacteriota;c__Methanobacteria;o__Methanobacteriales;f__Methanobacteriaceae;g__Methanobrevibacter_A;s__Methanobrevibacter_A smithii	ERS473238	ERP005989	Denmark	Europe
GUT_GENOME061502	ERR525959_bin.9	EBI	MAG	1966526	263	9555	30.95	92.8	0	0.05	0	57.48	0	19	NA	GUT_GENOME143185	MGYG-HGUT-02446	d__Archaea;p__Methanobacteriota;c__Methanobacteria;o__Methanobacteriales;f__Methanobacteriaceae;g__Methanobrevibacter_A;s__Methanobrevibacter_A smithii_A	ERS473294	ERP005989	Denmark	Europe
GUT_GENOME061699	ERR525979_bin.17	EBI	MAG	1626212	260	7252	32.23	82.53	2	0.09	0	0	0	17	NA	GUT_GENOME132205	MGYG-HGUT-02163	d__Archaea;p__Methanobacteriota;c__Methanobacteria;o__Methanobacteriales;f__Methanobacteriaceae;g__Methanobrevibacter_A;s__Methanobrevibacter_A smithii	ERS473314	ERP005989	Denmark	Europe
GUT_GENOME062449	ERR526043_bin.24	EBI	MAG	1354336	196	8445	31.98	92.53	0	0.09	0	0	0	20	NA	GUT_GENOME132205	MGYG-HGUT-02163	d__Archaea;p__Methanobacteriota;c__Methanobacteria;o__Methanobacteriales;f__Methanobacteriaceae;g__Methanobrevibacter_A;s__Methanobrevibacter_A smithii	ERS473378	ERP005989	Denmark	Europe
GUT_GENOME064289	ERR688506_bin.33	EBI	MAG	1619626	129	19925	30.63	95.2	0	0.18	0	0	0	19	NA	GUT_GENOME143185	MGYG-HGUT-02446	d__Archaea;p__Methanobacteriota;c__Methanobacteria;o__Methanobacteriales;f__Methanobacteriaceae;g__Methanobrevibacter_A;s__Methanobrevibacter_A smithii_A	ERS608499	ERP008729	Austria	Europe
GUT_GENOME064456	ERR688514_bin.2	EBI	MAG	1317961	290	5001	31.89	72.3	0	0.69	0	0	0	13	NA	GUT_GENOME132205	MGYG-HGUT-02163	d__Archaea;p__Methanobacteriota;c__Methanobacteria;o__Methanobacteriales;f__Methanobacteriaceae;g__Methanobrevibacter_A;s__Methanobrevibacter_A smithii	ERS608481	ERP008729	Austria	Europe
GUT_GENOME064523	ERR688517_bin.7	EBI	MAG	1701494	36	72523	31.2	99.2	0	0	0	0	0	20	NA	GUT_GENOME132205	MGYG-HGUT-02163	d__Archaea;p__Methanobacteriota;c__Methanobacteria;o__Methanobacteriales;f__Methanobacteriaceae;g__Methanobrevibacter_A;s__Methanobrevibacter_A smithii	ERS608589	ERP008729	Austria	Europe
GUT_GENOME064657	ERR688524_bin.25	EBI	MAG	1813236	264	9368	30.75	93.2	0	0.28	0	99.8	99.5	19	NA	GUT_GENOME143185	MGYG-HGUT-02446	d__Archaea;p__Methanobacteriota;c__Methanobacteria;o__Methanobacteriales;f__Methanobacteriaceae;g__Methanobrevibacter_A;s__Methanobrevibacter_A smithii_A	ERS608558	ERP008729	Austria	Europe
GUT_GENOME064731	ERR688530_bin.1	EBI	MAG	990630	242	4146	32.01	61.39	0	0.42	0	0	0	16	NA	GUT_GENOME132205	MGYG-HGUT-02163	d__Archaea;p__Methanobacteriota;c__Methanobacteria;o__Methanobacteriales;f__Methanobacteriaceae;g__Methanobrevibacter_A;s__Methanobrevibacter_A smithii	ERS608524	ERP008729	Austria	Europe
GUT_GENOME064905	ERR688540_bin.55	EBI	MAG	1603222	260	7013	31.21	87.2	3.2	0.03	0	0	0	19	NA	GUT_GENOME143185	MGYG-HGUT-02446	d__Archaea;p__Methanobacteriota;c__Methanobacteria;o__Methanobacteriales;f__Methanobacteriaceae;g__Methanobrevibacter_A;s__Methanobrevibacter_A smithii_A	ERS608564	ERP008729	Austria	Europe
GUT_GENOME065556	ERR688644_bin.7	EBI	MAG	1618177	261	8012	30.84	96.4	0.96	1.08	0	99.8	99.5	17	NA	GUT_GENOME143185	MGYG-HGUT-02446	d__Archaea;p__Methanobacteriota;c__Methanobacteria;o__Methanobacteriales;f__Methanobacteriaceae;g__Methanobrevibacter_A;s__Methanobrevibacter_A smithii_A	ERS608596	ERP008729	Austria	Europe
GUT_GENOME065782	ERR911958_bin.33	EBI	MAG	1794568	28	110864	30.42	97.6	0	0.04	0	0	0	20	NA	GUT_GENOME143185	MGYG-HGUT-02446	d__Archaea;p__Methanobacteriota;c__Methanobacteria;o__Methanobacteriales;f__Methanobacteriaceae;g__Methanobrevibacter_A;s__Methanobrevibacter_A smithii_A	ERS746715	ERP010700	United Kingdom	Europe
GUT_GENOME066253	ERS235502_56	HGM	MAG	1575941	34	75453	31.33	97.6	0	0.01	0	98.31	0	20	NA	GUT_GENOME132205	MGYG-HGUT-02163	d__Archaea;p__Methanobacteriota;c__Methanobacteria;o__Methanobacteriales;f__Methanobacteriaceae;g__Methanobrevibacter_A;s__Methanobrevibacter_A smithii	ERS235502	ERP002469	Sweden	Europe
GUT_GENOME066320	ERS235507_16	HGM	MAG	1930854	54	88035	30.29	100	0	0.01	0	0	0	20	NA	GUT_GENOME143185	MGYG-HGUT-02446	d__Archaea;p__Methanobacteriota;c__Methanobacteria;o__Methanobacteriales;f__Methanobacteriaceae;g__Methanobrevibacter_A;s__Methanobrevibacter_A smithii_A	ERS235507	ERP002469	Sweden	Europe
GUT_GENOME066393	ERS235511_30	HGM	MAG	1966155	69	43504	30.82	96.8	0	0.04	0	0	0	20	NA	GUT_GENOME143185	MGYG-HGUT-02446	d__Archaea;p__Methanobacteriota;c__Methanobacteria;o__Methanobacteriales;f__Methanobacteriaceae;g__Methanobrevibacter_A;s__Methanobrevibacter_A smithii_A	ERS235511	ERP002469	Sweden	Europe
GUT_GENOME066420	ERS235516_36	HGM	MAG	1030676	465	2448	31.66	61.68	0.8	NA	0	0	0	9	NA	GUT_GENOME132205	MGYG-HGUT-02163	d__Archaea;p__Methanobacteriota;c__Methanobacteria;o__Methanobacteriales;f__Methanobacteriaceae;g__Methanobrevibacter_A;s__Methanobrevibacter_A smithii	ERS235516	ERP002469	Sweden	Europe
GUT_GENOME066427	ERS235517_16	HGM	MAG	1704562	18	125647	31.19	100	0	0.02	0	0	0	20	NA	GUT_GENOME132205	MGYG-HGUT-02163	d__Archaea;p__Methanobacteriota;c__Methanobacteria;o__Methanobacteriales;f__Methanobacteriaceae;g__Methanobrevibacter_A;s__Methanobrevibacter_A smithii	ERS235517	ERP002469	Sweden	Europe
GUT_GENOME066503	ERS235522_26	HGM	MAG	1731379	67	39648	30.99	99.2	0	0.09	0	0	0	20	NA	GUT_GENOME132205	MGYG-HGUT-02163	d__Archaea;p__Methanobacteriota;c__Methanobacteria;o__Methanobacteriales;f__Methanobacteriaceae;g__Methanobrevibacter_A;s__Methanobrevibacter_A smithii	ERS235522	ERP002469	Sweden	Europe
GUT_GENOME066582	ERS235526_6	HGM	MAG	1159970	536	2407	31.8	72.14	0.8	NA	0	0	0	11	NA	GUT_GENOME132205	MGYG-HGUT-02163	d__Archaea;p__Methanobacteriota;c__Methanobacteria;o__Methanobacteriales;f__Methanobacteriaceae;g__Methanobrevibacter_A;s__Methanobrevibacter_A smithii	ERS235526	ERP002469	Sweden	Europe
GUT_GENOME066684	ERS235530_48	HGM	MAG	1711169	37	85010	31.23	100	0	0.01	0	0	14.78	20	NA	GUT_GENOME132205	MGYG-HGUT-02163	d__Archaea;p__Methanobacteriota;c__Methanobacteria;o__Methanobacteriales;f__Methanobacteriaceae;g__Methanobrevibacter_A;s__Methanobrevibacter_A smithii	ERS235530	ERP002469	Sweden	Europe
GUT_GENOME066844	ERS235537_105	HGM	MAG	2132614	91	57118	31.31	100	0.8	0.01	0	0	0	20	NA	GUT_GENOME132205	MGYG-HGUT-02163	d__Archaea;p__Methanobacteriota;c__Methanobacteria;o__Methanobacteriales;f__Methanobacteriaceae;g__Methanobrevibacter_A;s__Methanobrevibacter_A smithii	ERS235537	ERP002469	Sweden	Europe
GUT_GENOME066883	ERS235538_14	HGM	MAG	1369096	444	3718	31.55	83.52	0	0.57	0	0	0	15	NA	GUT_GENOME132205	MGYG-HGUT-02163	d__Archaea;p__Methanobacteriota;c__Methanobacteria;o__Methanobacteriales;f__Methanobacteriaceae;g__Methanobrevibacter_A;s__Methanobrevibacter_A smithii	ERS235538	ERP002469	Sweden	Europe
GUT_GENOME067098	ERS235547_16	HGM	MAG	1222956	214	7135	28.23	87.73	0.4	0.81	0	0	0	10	NA	GUT_GENOME132206	MGYG-HGUT-02164	d__Archaea;p__Methanobacteriota;c__Methanobacteria;o__Methanobacteriales;f__Methanobacteriaceae;g__Methanosphaera;s__Methanosphaera stadtmanae	ERS235547	ERP002469	Sweden	Europe
GUT_GENOME067103	ERS235547_37	HGM	MAG	1841999	60	63561	31.11	100	0	0.01	0	99.46	65.25	20	NA	GUT_GENOME132205	MGYG-HGUT-02163	d__Archaea;p__Methanobacteriota;c__Methanobacteria;o__Methanobacteriales;f__Methanobacteriaceae;g__Methanobrevibacter_A;s__Methanobrevibacter_A smithii	ERS235547	ERP002469	Sweden	Europe
GUT_GENOME067146	ERS235548_6	HGM	MAG	1813147	52	61407	30.97	100	0	0.01	0	0	0	20	NA	GUT_GENOME132205	MGYG-HGUT-02163	d__Archaea;p__Methanobacteriota;c__Methanobacteria;o__Methanobacteriales;f__Methanobacteriaceae;g__Methanobrevibacter_A;s__Methanobrevibacter_A smithii	ERS235548	ERP002469	Sweden	Europe
GUT_GENOME067209	ERS235550_72	HGM	MAG	1612255	37	64997	31.37	95.2	0	0.02	0	99.8	99.5	20	NA	GUT_GENOME132205	MGYG-HGUT-02163	d__Archaea;p__Methanobacteriota;c__Methanobacteria;o__Methanobacteriales;f__Methanobacteriaceae;g__Methanobrevibacter_A;s__Methanobrevibacter_A smithii	ERS235550	ERP002469	Sweden	Europe
GUT_GENOME067252	ERS235553_13	HGM	MAG	1827584	44	68970	30.44	100	0	0.02	0	0	0	20	NA	GUT_GENOME143185	MGYG-HGUT-02446	d__Archaea;p__Methanobacteriota;c__Methanobacteria;o__Methanobacteriales;f__Methanobacteriaceae;g__Methanobrevibacter_A;s__Methanobrevibacter_A smithii_A	ERS235553	ERP002469	Sweden	Europe
GUT_GENOME067310	ERS235554_80	HGM	MAG	963640	450	2311	31.01	63.6	0	0.41	0	0	0	11	NA	GUT_GENOME143185	MGYG-HGUT-02446	d__Archaea;p__Methanobacteriota;c__Methanobacteria;o__Methanobacteriales;f__Methanobacteriaceae;g__Methanobrevibacter_A;s__Methanobrevibacter_A smithii_A	ERS235554	ERP002469	Sweden	Europe
GUT_GENOME067374	ERS235557_27	HGM	MAG	1738963	234	9934	31.77	95.6	1.6	0.2	0	0	0	19	NA	GUT_GENOME132205	MGYG-HGUT-02163	d__Archaea;p__Methanobacteriota;c__Methanobacteria;o__Methanobacteriales;f__Methanobacteriaceae;g__Methanobrevibacter_A;s__Methanobrevibacter_A smithii	ERS235557	ERP002469	Sweden	Europe
GUT_GENOME067400	ERS235558_36	HGM	MAG	1744581	100	31603	31.13	98.4	0	0.04	0	0	0	20	NA	GUT_GENOME132205	MGYG-HGUT-02163	d__Archaea;p__Methanobacteriota;c__Methanobacteria;o__Methanobacteriales;f__Methanobacteriaceae;g__Methanobrevibacter_A;s__Methanobrevibacter_A smithii	ERS235558	ERP002469	Sweden	Europe
GUT_GENOME067420	ERS235559_19	HGM	MAG	1863422	34	191766	31.05	100	0	0.01	0	0	0	20	NA	GUT_GENOME132205	MGYG-HGUT-02163	d__Archaea;p__Methanobacteriota;c__Methanobacteria;o__Methanobacteriales;f__Methanobacteriaceae;g__Methanobrevibacter_A;s__Methanobrevibacter_A smithii	ERS235559	ERP002469	Sweden	Europe
GUT_GENOME067512	ERS235563_21	HGM	MAG	1631316	330	6653	31.25	95.2	0.47	1.11	0	0	24.08	19	NA	GUT_GENOME132205	MGYG-HGUT-02163	d__Archaea;p__Methanobacteriota;c__Methanobacteria;o__Methanobacteriales;f__Methanobacteriaceae;g__Methanobrevibacter_A;s__Methanobrevibacter_A smithii	ERS235563	ERP002469	Sweden	Europe
GUT_GENOME067559	ERS235564_69	HGM	MAG	1683361	205	11697	30.83	98.23	0.8	0.58	0	62.22	0	20	NA	GUT_GENOME143185	MGYG-HGUT-02446	d__Archaea;p__Methanobacteriota;c__Methanobacteria;o__Methanobacteriales;f__Methanobacteriaceae;g__Methanobrevibacter_A;s__Methanobrevibacter_A smithii_A	ERS235564	ERP002469	Sweden	Europe
GUT_GENOME067622	ERS235567_45	HGM	MAG	899736	494	1903	32.43	59.85	1.6	0.31	0	0	0	10	NA	GUT_GENOME132205	MGYG-HGUT-02163	d__Archaea;p__Methanobacteriota;c__Methanobacteria;o__Methanobacteriales;f__Methanobacteriaceae;g__Methanobrevibacter_A;s__Methanobrevibacter_A smithii	ERS235567	ERP002469	Sweden	Europe
GUT_GENOME067633	ERS235568_11	HGM	MAG	1628815	130	23964	31.23	97.33	0	0.31	0	0	0	20	NA	GUT_GENOME132205	MGYG-HGUT-02163	d__Archaea;p__Methanobacteriota;c__Methanobacteria;o__Methanobacteriales;f__Methanobacteriaceae;g__Methanobrevibacter_A;s__Methanobrevibacter_A smithii	ERS235568	ERP002469	Sweden	Europe
GUT_GENOME067742	ERS235573_67	HGM	MAG	1743999	50	57765	30.87	97.35	0	0.03	0	0	0	20	NA	GUT_GENOME132205	MGYG-HGUT-02163	d__Archaea;p__Methanobacteriota;c__Methanobacteria;o__Methanobacteriales;f__Methanobacteriaceae;g__Methanobrevibacter_A;s__Methanobrevibacter_A smithii	ERS235573	ERP002469	Sweden	Europe
GUT_GENOME067747	ERS235574_12	HGM	MAG	1063569	508	2305	32.04	75.45	0.8	NA	0	0	0	15	NA	GUT_GENOME132205	MGYG-HGUT-02163	d__Archaea;p__Methanobacteriota;c__Methanobacteria;o__Methanobacteriales;f__Methanobacteriaceae;g__Methanobrevibacter_A;s__Methanobrevibacter_A smithii	ERS235574	ERP002469	Sweden	Europe
GUT_GENOME067877	ERS235585_33	HGM	MAG	1803297	105	28309	31.09	96	0	0.03	0	0	0	20	NA	GUT_GENOME132205	MGYG-HGUT-02163	d__Archaea;p__Methanobacteriota;c__Methanobacteria;o__Methanobacteriales;f__Methanobacteriaceae;g__Methanobrevibacter_A;s__Methanobrevibacter_A smithii	ERS235585	ERP002469	Sweden	Europe
GUT_GENOME067904	ERS235588_24	HGM	MAG	1515958	268	8612	31.43	90.4	0.4	0.38	0	0	0	14	NA	GUT_GENOME132205	MGYG-HGUT-02163	d__Archaea;p__Methanobacteriota;c__Methanobacteria;o__Methanobacteriales;f__Methanobacteriaceae;g__Methanobrevibacter_A;s__Methanobrevibacter_A smithii	ERS235588	ERP002469	Sweden	Europe
GUT_GENOME067936	ERS235589_36	HGM	MAG	1286518	451	3404	31.5	85.2	1.87	0	0	0	0	13	NA	GUT_GENOME132205	MGYG-HGUT-02163	d__Archaea;p__Methanobacteriota;c__Methanobacteria;o__Methanobacteriales;f__Methanobacteriaceae;g__Methanobrevibacter_A;s__Methanobrevibacter_A smithii	ERS235589	ERP002469	Sweden	Europe
GUT_GENOME067949	ERS235590_33	HGM	MAG	1574683	27	74116	31.33	98.4	0	0	0	0	0	19	NA	GUT_GENOME132205	MGYG-HGUT-02163	d__Archaea;p__Methanobacteriota;c__Methanobacteria;o__Methanobacteriales;f__Methanobacteriaceae;g__Methanobrevibacter_A;s__Methanobrevibacter_A smithii	ERS235590	ERP002469	Sweden	Europe
GUT_GENOME067999	ERS235592_63	HGM	MAG	1821048	61	62499	31.2	100	0	0.05	0	0	14.52	20	NA	GUT_GENOME132205	MGYG-HGUT-02163	d__Archaea;p__Methanobacteriota;c__Methanobacteria;o__Methanobacteriales;f__Methanobacteriaceae;g__Methanobrevibacter_A;s__Methanobrevibacter_A smithii	ERS235592	ERP002469	Sweden	Europe
GUT_GENOME068037	ERS235594_43	HGM	MAG	1796533	214	12432	32.14	95.47	2.4	0.36	0	0	0	20	NA	GUT_GENOME132205	MGYG-HGUT-02163	d__Archaea;p__Methanobacteriota;c__Methanobacteria;o__Methanobacteriales;f__Methanobacteriaceae;g__Methanobrevibacter_A;s__Methanobrevibacter_A smithii	ERS235594	ERP002469	Sweden	Europe
GUT_GENOME068055	ERS235596_57	HGM	MAG	1191734	501	2747	31.45	74.27	0.8	0.41	0	24.98	0	14	NA	GUT_GENOME132205	MGYG-HGUT-02163	d__Archaea;p__Methanobacteriota;c__Methanobacteria;o__Methanobacteriales;f__Methanobacteriaceae;g__Methanobrevibacter_A;s__Methanobrevibacter_A smithii	ERS235596	ERP002469	Sweden	Europe
GUT_GENOME068080	ERS235598_4	HGM	MAG	1588131	27	68755	30.7	99.2	0	0.01	0	0	0	20	NA	GUT_GENOME143185	MGYG-HGUT-02446	d__Archaea;p__Methanobacteriota;c__Methanobacteria;o__Methanobacteriales;f__Methanobacteriaceae;g__Methanobrevibacter_A;s__Methanobrevibacter_A smithii_A	ERS235598	ERP002469	Sweden	Europe
GUT_GENOME068103	ERS235600_9	HGM	MAG	1583382	100	24623	31.22	94.8	0	0.06	0	0	14.48	20	NA	GUT_GENOME132205	MGYG-HGUT-02163	d__Archaea;p__Methanobacteriota;c__Methanobacteria;o__Methanobacteriales;f__Methanobacteriaceae;g__Methanobrevibacter_A;s__Methanobrevibacter_A smithii	ERS235600	ERP002469	Sweden	Europe
GUT_GENOME068190	ERS235605_49	HGM	MAG	1638794	19	109012	31.3	100	0	0.01	0	0	0	20	NA	GUT_GENOME132205	MGYG-HGUT-02163	d__Archaea;p__Methanobacteriota;c__Methanobacteria;o__Methanobacteriales;f__Methanobacteriaceae;g__Methanobrevibacter_A;s__Methanobrevibacter_A smithii	ERS235605	ERP002469	Sweden	Europe
GUT_GENOME068201	ERS235606_26	HGM	MAG	1589379	330	6699	31.5	92.37	0.4	0.51	0	0	0	19	NA	GUT_GENOME132205	MGYG-HGUT-02163	d__Archaea;p__Methanobacteriota;c__Methanobacteria;o__Methanobacteriales;f__Methanobacteriaceae;g__Methanobrevibacter_A;s__Methanobrevibacter_A smithii	ERS235606	ERP002469	Sweden	Europe
GUT_GENOME068259	ERS235609_60	HGM	MAG	1610810	403	5150	31.55	87	0.8	0.39	0	0	0	19	NA	GUT_GENOME132205	MGYG-HGUT-02163	d__Archaea;p__Methanobacteriota;c__Methanobacteria;o__Methanobacteriales;f__Methanobacteriaceae;g__Methanobrevibacter_A;s__Methanobrevibacter_A smithii	ERS235609	ERP002469	Sweden	Europe
GUT_GENOME068355	ERS235616_19	HGM	MAG	1856464	130	21289	31.87	96.8	0	0.04	0	0	0	19	NA	GUT_GENOME132205	MGYG-HGUT-02163	d__Archaea;p__Methanobacteriota;c__Methanobacteria;o__Methanobacteriales;f__Methanobacteriaceae;g__Methanobrevibacter_A;s__Methanobrevibacter_A smithii	ERS235616	ERP002469	Sweden	Europe
GUT_GENOME068408	ERS235618_47	HGM	MAG	1776992	72	51698	31.09	99.2	0	0.01	0	0	0	20	NA	GUT_GENOME132205	MGYG-HGUT-02163	d__Archaea;p__Methanobacteriota;c__Methanobacteria;o__Methanobacteriales;f__Methanobacteriaceae;g__Methanobrevibacter_A;s__Methanobrevibacter_A smithii	ERS235618	ERP002469	Sweden	Europe
GUT_GENOME068480	ERS235621_85	HGM	MAG	1535130	35	67142	30.64	96.8	0	0.02	0	0	0	20	NA	GUT_GENOME143185	MGYG-HGUT-02446	d__Archaea;p__Methanobacteriota;c__Methanobacteria;o__Methanobacteriales;f__Methanobacteriaceae;g__Methanobrevibacter_A;s__Methanobrevibacter_A smithii_A	ERS235621	ERP002469	Sweden	Europe
GUT_GENOME068622	ERS235628_40	HGM	MAG	1775840	79	35548	31.39	97.6	0	0.02	0	0	0	20	NA	GUT_GENOME132205	MGYG-HGUT-02163	d__Archaea;p__Methanobacteriota;c__Methanobacteria;o__Methanobacteriales;f__Methanobacteriaceae;g__Methanobrevibacter_A;s__Methanobrevibacter_A smithii	ERS235628	ERP002469	Sweden	Europe
GUT_GENOME068702	ERS235631_49	HGM	MAG	1536659	349	5822	30.87	93.44	1.6	0.95	0	0	0	19	NA	GUT_GENOME143185	MGYG-HGUT-02446	d__Archaea;p__Methanobacteriota;c__Methanobacteria;o__Methanobacteriales;f__Methanobacteriaceae;g__Methanobrevibacter_A;s__Methanobrevibacter_A smithii_A	ERS235631	ERP002469	Sweden	Europe
GUT_GENOME068717	ERS235632_3	HGM	MAG	1360351	535	2920	32.01	78.67	0	0.19	0	0	0	10	NA	GUT_GENOME132205	MGYG-HGUT-02163	d__Archaea;p__Methanobacteriota;c__Methanobacteria;o__Methanobacteriales;f__Methanobacteriaceae;g__Methanobrevibacter_A;s__Methanobrevibacter_A smithii	ERS235632	ERP002469	Sweden	Europe
GUT_GENOME069098	ERS396304_45	HGM	MAG	1528975	104	23392	31.36	91.73	0	0.01	0	0	0	20	NA	GUT_GENOME132205	MGYG-HGUT-02163	d__Archaea;p__Methanobacteriota;c__Methanobacteria;o__Methanobacteriales;f__Methanobacteriaceae;g__Methanobrevibacter_A;s__Methanobrevibacter_A smithii	ERS396304	ERP004605	Denmark	Europe
GUT_GENOME069432	ERS396316_58	HGM	MAG	1744803	231	10404	30.54	97.33	0.96	0.09	0	0	0	20	NA	GUT_GENOME143185	MGYG-HGUT-02446	d__Archaea;p__Methanobacteriota;c__Methanobacteria;o__Methanobacteriales;f__Methanobacteriaceae;g__Methanobrevibacter_A;s__Methanobrevibacter_A smithii_A	ERS396316	ERP004605	Denmark	Europe
GUT_GENOME069631	ERS396323_80	HGM	MAG	1197146	147	10359	41.88	69.68	1.61	0.05	92.44	0	99.03	15	NA	GUT_GENOME132202	MGYG-HGUT-02160	d__Archaea;p__Thermoplasmatota;c__Thermoplasmata;o__Methanomassiliicoccales;f__Methanomassiliicoccaceae;g__Methanomassiliicoccus_A;s__Methanomassiliicoccus_A intestinalis	ERS396323	ERP004605	Denmark	Europe
GUT_GENOME069926	ERS396335_50	HGM	MAG	1673177	147	17696	30.6	96	0	0.04	0	0	0	18	NA	GUT_GENOME143185	MGYG-HGUT-02446	d__Archaea;p__Methanobacteriota;c__Methanobacteria;o__Methanobacteriales;f__Methanobacteriaceae;g__Methanobrevibacter_A;s__Methanobrevibacter_A smithii_A	ERS396335	ERP004605	Denmark	Europe
GUT_GENOME070007	ERS396339_2	HGM	MAG	1050199	502	2279	32.1	67.77	0.98	0.11	0	0	0	9	NA	GUT_GENOME132205	MGYG-HGUT-02163	d__Archaea;p__Methanobacteriota;c__Methanobacteria;o__Methanobacteriales;f__Methanobacteriaceae;g__Methanobrevibacter_A;s__Methanobrevibacter_A smithii	ERS396339	ERP004605	Denmark	Europe
GUT_GENOME070359	ERS396354_34	HGM	MAG	1538611	32	62459	31.36	97.6	0	0	0	0	0	20	NA	GUT_GENOME132205	MGYG-HGUT-02163	d__Archaea;p__Methanobacteriota;c__Methanobacteria;o__Methanobacteriales;f__Methanobacteriaceae;g__Methanobrevibacter_A;s__Methanobrevibacter_A smithii	ERS396354	ERP004605	Denmark	Europe
GUT_GENOME070455	ERS396357_24	HGM	MAG	1500753	672	2512	57.49	74.51	2.42	0.25	86.55	0	0	19	NA	GUT_GENOME268463	MGYG-HGUT-04339	d__Archaea;p__Thermoplasmatota;c__Thermoplasmata;o__Methanomassiliicoccales;f__Methanomethylophilaceae;g__UBA71;s__	ERS396357	ERP004605	Denmark	Europe
GUT_GENOME070697	ERS396366_36	HGM	MAG	881649	457	2072	32.59	61.53	0.8	0.75	0	0	0	5	NA	GUT_GENOME132205	MGYG-HGUT-02163	d__Archaea;p__Methanobacteriota;c__Methanobacteria;o__Methanobacteriales;f__Methanobacteriaceae;g__Methanobrevibacter_A;s__Methanobrevibacter_A smithii	ERS396366	ERP004605	Denmark	Europe
GUT_GENOME071408	ERS396390_75	HGM	MAG	1432829	378	4861	31.45	88.25	2.4	0.11	0	0	33.11	15	NA	GUT_GENOME132205	MGYG-HGUT-02163	d__Archaea;p__Methanobacteriota;c__Methanobacteria;o__Methanobacteriales;f__Methanobacteriaceae;g__Methanobrevibacter_A;s__Methanobrevibacter_A smithii	ERS396390	ERP004605	Denmark	Europe
GUT_GENOME071636	ERS396398_32	HGM	MAG	1517425	61	43974	41.66	87.5	0	0.03	92.44	0	99.03	19	NA	GUT_GENOME132202	MGYG-HGUT-02160	d__Archaea;p__Thermoplasmatota;c__Thermoplasmata;o__Methanomassiliicoccales;f__Methanomassiliicoccaceae;g__Methanomassiliicoccus_A;s__Methanomassiliicoccus_A intestinalis	ERS396398	ERP004605	Denmark	Europe
GUT_GENOME071966	ERS396410_91	HGM	MAG	1183194	508	2607	32.23	70.3	1.6	0.16	0	0	0	13	NA	GUT_GENOME132205	MGYG-HGUT-02163	d__Archaea;p__Methanobacteriota;c__Methanobacteria;o__Methanobacteriales;f__Methanobacteriaceae;g__Methanobrevibacter_A;s__Methanobrevibacter_A smithii	ERS396410	ERP004605	Spain	Europe
GUT_GENOME071982	ERS396411_50	HGM	MAG	1349313	471	3371	32.23	87.55	1.6	0.16	0	0	0	15	NA	GUT_GENOME132205	MGYG-HGUT-02163	d__Archaea;p__Methanobacteriota;c__Methanobacteria;o__Methanobacteriales;f__Methanobacteriaceae;g__Methanobrevibacter_A;s__Methanobrevibacter_A smithii	ERS396411	ERP004605	Spain	Europe
GUT_GENOME072265	ERS396424_67	HGM	MAG	1241642	459	3138	32.2	71.19	0	0.21	0	0	0	8	NA	GUT_GENOME132205	MGYG-HGUT-02163	d__Archaea;p__Methanobacteriota;c__Methanobacteria;o__Methanobacteriales;f__Methanobacteriaceae;g__Methanobrevibacter_A;s__Methanobrevibacter_A smithii	ERS396424	ERP004605	Spain	Europe
GUT_GENOME072310	ERS396427_37	HGM	MAG	1557876	78	35642	31.4	97.6	0.8	0	0	99.8	68.7	20	NA	GUT_GENOME132205	MGYG-HGUT-02163	d__Archaea;p__Methanobacteriota;c__Methanobacteria;o__Methanobacteriales;f__Methanobacteriaceae;g__Methanobrevibacter_A;s__Methanobrevibacter_A smithii	ERS396427	ERP004605	Spain	Europe
GUT_GENOME072352	ERS396429_11	HGM	MAG	1565928	29	111356	31.35	98.4	0	0	0	0	0	20	NA	GUT_GENOME132205	MGYG-HGUT-02163	d__Archaea;p__Methanobacteriota;c__Methanobacteria;o__Methanobacteriales;f__Methanobacteriaceae;g__Methanobrevibacter_A;s__Methanobrevibacter_A smithii	ERS396429	ERP004605	Spain	Europe
GUT_GENOME072661	ERS396440_45	HGM	MAG	1701185	310	6877	31.38	87.33	0	0.04	0	0	0	20	NA	GUT_GENOME132205	MGYG-HGUT-02163	d__Archaea;p__Methanobacteriota;c__Methanobacteria;o__Methanobacteriales;f__Methanobacteriaceae;g__Methanobrevibacter_A;s__Methanobrevibacter_A smithii	ERS396440	ERP004605	Spain	Europe
GUT_GENOME072832	ERS396446_51	HGM	MAG	1831890	215	11822	31.64	96.4	0	0.02	0	99.8	99.5	19	NA	GUT_GENOME132205	MGYG-HGUT-02163	d__Archaea;p__Methanobacteriota;c__Methanobacteria;o__Methanobacteriales;f__Methanobacteriaceae;g__Methanobrevibacter_A;s__Methanobrevibacter_A smithii	ERS396446	ERP004605	Spain	Europe
GUT_GENOME073398	ERS396471_3	HGM	MAG	1751243	174	15956	31.08	97.89	0.04	0	0	0	0	16	NA	GUT_GENOME132205	MGYG-HGUT-02163	d__Archaea;p__Methanobacteriota;c__Methanobacteria;o__Methanobacteriales;f__Methanobacteriaceae;g__Methanobrevibacter_A;s__Methanobrevibacter_A smithii	ERS396471	ERP004605	Spain	Europe
GUT_GENOME073874	ERS396489_28	HGM	MAG	1702249	39	86833	31.16	100	0	0	0	0	0	20	NA	GUT_GENOME132205	MGYG-HGUT-02163	d__Archaea;p__Methanobacteriota;c__Methanobacteria;o__Methanobacteriales;f__Methanobacteriaceae;g__Methanobrevibacter_A;s__Methanobrevibacter_A smithii	ERS396489	ERP004605	Spain	Europe
GUT_GENOME074072	ERS396495_76	HGM	MAG	1775689	38	111600	31	100	0	0	0	0	0	20	NA	GUT_GENOME132205	MGYG-HGUT-02163	d__Archaea;p__Methanobacteriota;c__Methanobacteria;o__Methanobacteriales;f__Methanobacteriaceae;g__Methanobrevibacter_A;s__Methanobrevibacter_A smithii	ERS396495	ERP004605	Spain	Europe
GUT_GENOME074160	ERS396498_11	HGM	MAG	1626986	254	8840	31.51	90.13	0	0	0	0	0	19	NA	GUT_GENOME132205	MGYG-HGUT-02163	d__Archaea;p__Methanobacteriota;c__Methanobacteria;o__Methanobacteriales;f__Methanobacteriaceae;g__Methanobrevibacter_A;s__Methanobrevibacter_A smithii	ERS396498	ERP004605	Spain	Europe
GUT_GENOME074412	ERS396505_42	HGM	MAG	1570185	262	8085	31.55	89.6	0	0.09	0	0	0	19	NA	GUT_GENOME132205	MGYG-HGUT-02163	d__Archaea;p__Methanobacteriota;c__Methanobacteria;o__Methanobacteriales;f__Methanobacteriaceae;g__Methanobrevibacter_A;s__Methanobrevibacter_A smithii	ERS396505	ERP004605	Spain	Europe
GUT_GENOME074458	ERS396506_49	HGM	MAG	1418416	356	5149	31.77	87.6	0.04	0	0	0	0	18	NA	GUT_GENOME132205	MGYG-HGUT-02163	d__Archaea;p__Methanobacteriota;c__Methanobacteria;o__Methanobacteriales;f__Methanobacteriaceae;g__Methanobrevibacter_A;s__Methanobrevibacter_A smithii	ERS396506	ERP004605	Spain	Europe
GUT_GENOME074541	ERS396508_65	HGM	MAG	1622747	23	112472	31.3	98.4	0	0	0	0	0	20	NA	GUT_GENOME132205	MGYG-HGUT-02163	d__Archaea;p__Methanobacteriota;c__Methanobacteria;o__Methanobacteriales;f__Methanobacteriaceae;g__Methanobrevibacter_A;s__Methanobrevibacter_A smithii	ERS396508	ERP004605	Spain	Europe
GUT_GENOME075229	ERS396529_8	HGM	MAG	1800442	43	66968	31.3	98.44	0	0.02	0	0	0	20	NA	GUT_GENOME132205	MGYG-HGUT-02163	d__Archaea;p__Methanobacteriota;c__Methanobacteria;o__Methanobacteriales;f__Methanobacteriaceae;g__Methanobrevibacter_A;s__Methanobrevibacter_A smithii	ERS396529	ERP004605	Spain	Europe
GUT_GENOME076374	ERS473088_2	HGM	MAG	1240454	539	2541	32.4	73.68	0	0.37	0	0	0	12	NA	GUT_GENOME132205	MGYG-HGUT-02163	d__Archaea;p__Methanobacteriota;c__Methanobacteria;o__Methanobacteriales;f__Methanobacteriaceae;g__Methanobrevibacter_A;s__Methanobrevibacter_A smithii	ERS473088	ERP005989	Sweden	Europe
GUT_GENOME076595	ERS473106_6	HGM	MAG	1750518	155	17620	31.52	97.2	0	0.01	0	0	0	20	NA	GUT_GENOME132205	MGYG-HGUT-02163	d__Archaea;p__Methanobacteriota;c__Methanobacteria;o__Methanobacteriales;f__Methanobacteriaceae;g__Methanobrevibacter_A;s__Methanobrevibacter_A smithii	ERS473106	ERP005989	Sweden	Europe
GUT_GENOME077512	ERS473186_35	HGM	MAG	1188671	516	2614	32.69	73.81	0.8	0.24	0	0	0	5	NA	GUT_GENOME132205	MGYG-HGUT-02163	d__Archaea;p__Methanobacteriota;c__Methanobacteria;o__Methanobacteriales;f__Methanobacteriaceae;g__Methanobrevibacter_A;s__Methanobrevibacter_A smithii	ERS473186	ERP005989	Sweden	Europe
GUT_GENOME078028	ERS473224_2	HGM	MAG	1250543	540	2639	55.9	75.43	0.81	0	67.23	38.86	71	16	NA	GUT_GENOME143252	MGYG-HGUT-02456	d__Archaea;p__Thermoplasmatota;c__Thermoplasmata;o__Methanomassiliicoccales;f__Methanomethylophilaceae;g__Methanomethylophilus;s__Methanomethylophilus alvus	ERS473224	ERP005989	Sweden	Europe
GUT_GENOME078850	ERS473283_2	HGM	MAG	1422561	538	3092	31.28	79.47	0.4	0.2	0	0	0	12	NA	GUT_GENOME143185	MGYG-HGUT-02446	d__Archaea;p__Methanobacteriota;c__Methanobacteria;o__Methanobacteriales;f__Methanobacteriaceae;g__Methanobrevibacter_A;s__Methanobrevibacter_A smithii_A	ERS473283	ERP005989	Sweden	Europe
GUT_GENOME078972	ERS473294_3	HGM	MAG	1656543	275	7363	30.77	94.53	0	0.04	0	0	0	18	NA	GUT_GENOME143185	MGYG-HGUT-02446	d__Archaea;p__Methanobacteriota;c__Methanobacteria;o__Methanobacteriales;f__Methanobacteriaceae;g__Methanobrevibacter_A;s__Methanobrevibacter_A smithii_A	ERS473294	ERP005989	Sweden	Europe
GUT_GENOME079980	ERS473378_52	HGM	MAG	1552649	305	6562	32.07	90.53	0	0.02	0	0	0	18	NA	GUT_GENOME132205	MGYG-HGUT-02163	d__Archaea;p__Methanobacteriota;c__Methanobacteria;o__Methanobacteriales;f__Methanobacteriaceae;g__Methanobrevibacter_A;s__Methanobrevibacter_A smithii	ERS473378	ERP005989	Sweden	Europe
GUT_GENOME081982	ERS537232_8	HGM	MAG	1320386	380	4262	32.03	82.31	1.6	0	0	0	0	15	NA	GUT_GENOME132205	MGYG-HGUT-02163	d__Archaea;p__Methanobacteriota;c__Methanobacteria;o__Methanobacteriales;f__Methanobacteriaceae;g__Methanobrevibacter_A;s__Methanobrevibacter_A smithii	ERS537232	ERP006678	China	Asia
GUT_GENOME083134	ERS537275_57	HGM	MAG	1614352	307	7292	31.45	92	1.76	0.07	0	0	0	20	NA	GUT_GENOME132205	MGYG-HGUT-02163	d__Archaea;p__Methanobacteriota;c__Methanobacteria;o__Methanobacteriales;f__Methanobacteriaceae;g__Methanobrevibacter_A;s__Methanobrevibacter_A smithii	ERS537275	ERP006678	China	Asia
GUT_GENOME083880	ERS537301_13	HGM	MAG	1210075	413	3455	32.09	78.57	0	0.2	0	0	0	10	NA	GUT_GENOME132205	MGYG-HGUT-02163	d__Archaea;p__Methanobacteriota;c__Methanobacteria;o__Methanobacteriales;f__Methanobacteriaceae;g__Methanobrevibacter_A;s__Methanobrevibacter_A smithii	ERS537301	ERP006678	China	Asia
GUT_GENOME083975	ERS537304_12	HGM	MAG	1864530	45	115610	31.01	100	0	0.01	0	45.29	0	20	NA	GUT_GENOME132205	MGYG-HGUT-02163	d__Archaea;p__Methanobacteriota;c__Methanobacteria;o__Methanobacteriales;f__Methanobacteriaceae;g__Methanobrevibacter_A;s__Methanobrevibacter_A smithii	ERS537304	ERP006678	China	Asia
GUT_GENOME083979	ERS537304_25	HGM	MAG	1565103	146	15987	58.18	86.42	0.81	0.19	86.55	0	99.13	19	NA	GUT_GENOME268463	MGYG-HGUT-04339	d__Archaea;p__Thermoplasmatota;c__Thermoplasmata;o__Methanomassiliicoccales;f__Methanomethylophilaceae;g__UBA71;s__	ERS537304	ERP006678	China	Asia
GUT_GENOME084154	ERS537310_4	HGM	MAG	1334238	26	73999	31.49	91.2	0.8	0.01	0	0	0	19	NA	GUT_GENOME132205	MGYG-HGUT-02163	d__Archaea;p__Methanobacteriota;c__Methanobacteria;o__Methanobacteriales;f__Methanobacteriaceae;g__Methanobrevibacter_A;s__Methanobrevibacter_A smithii	ERS537310	ERP006678	China	Asia
GUT_GENOME084567	ERS537325_81	HGM	MAG	1738417	34	104768	31.1	99.2	0	0	0	0	0	20	NA	GUT_GENOME132205	MGYG-HGUT-02163	d__Archaea;p__Methanobacteriota;c__Methanobacteria;o__Methanobacteriales;f__Methanobacteriaceae;g__Methanobrevibacter_A;s__Methanobrevibacter_A smithii	ERS537325	ERP006678	China	Asia
GUT_GENOME085231	ERS537348_13	HGM	MAG	1831404	46	120061	31.01	100	0	0.01	0	0	0	20	NA	GUT_GENOME132205	MGYG-HGUT-02163	d__Archaea;p__Methanobacteriota;c__Methanobacteria;o__Methanobacteriales;f__Methanobacteriaceae;g__Methanobrevibacter_A;s__Methanobrevibacter_A smithii	ERS537348	ERP006678	China	Asia
GUT_GENOME085625	ERS537361_21	HGM	MAG	1381697	30	62826	31.56	90.89	0	0	0	0	0	20	NA	GUT_GENOME132205	MGYG-HGUT-02163	d__Archaea;p__Methanobacteriota;c__Methanobacteria;o__Methanobacteriales;f__Methanobacteriaceae;g__Methanobrevibacter_A;s__Methanobrevibacter_A smithii	ERS537361	ERP006678	China	Asia
GUT_GENOME086119	ERS537378_47	HGM	MAG	1391243	94	17419	31.72	92.8	0	0.01	0	0	0	20	NA	GUT_GENOME132205	MGYG-HGUT-02163	d__Archaea;p__Methanobacteriota;c__Methanobacteria;o__Methanobacteriales;f__Methanobacteriaceae;g__Methanobrevibacter_A;s__Methanobrevibacter_A smithii	ERS537378	ERP006678	China	Asia
GUT_GENOME086148	ERS537379_37	HGM	MAG	1487918	378	4730	31.61	87.9	1.6	0.02	0	99.8	99.5	15	NA	GUT_GENOME132205	MGYG-HGUT-02163	d__Archaea;p__Methanobacteriota;c__Methanobacteria;o__Methanobacteriales;f__Methanobacteriaceae;g__Methanobrevibacter_A;s__Methanobrevibacter_A smithii	ERS537379	ERP006678	China	Asia
GUT_GENOME086463	ERS537390_67	HGM	MAG	1521877	277	7424	31.67	96.34	0	0.14	0	0	0	16	NA	GUT_GENOME132205	MGYG-HGUT-02163	d__Archaea;p__Methanobacteriota;c__Methanobacteria;o__Methanobacteriales;f__Methanobacteriaceae;g__Methanobrevibacter_A;s__Methanobrevibacter_A smithii	ERS537390	ERP006678	China	Asia
GUT_GENOME086558	ERS537394_60	HGM	MAG	1428725	397	4533	31.72	89.29	0.8	0.13	0	0	0	16	NA	GUT_GENOME132205	MGYG-HGUT-02163	d__Archaea;p__Methanobacteriota;c__Methanobacteria;o__Methanobacteriales;f__Methanobacteriaceae;g__Methanobrevibacter_A;s__Methanobrevibacter_A smithii	ERS537394	ERP006678	China	Asia
GUT_GENOME086893	ERS537409_80	HGM	MAG	1887494	36	91651	31.31	100	0	0.01	0	0	0	20	NA	GUT_GENOME132205	MGYG-HGUT-02163	d__Archaea;p__Methanobacteriota;c__Methanobacteria;o__Methanobacteriales;f__Methanobacteriaceae;g__Methanobrevibacter_A;s__Methanobrevibacter_A smithii	ERS537409	ERP006678	China	Asia
GUT_GENOME086975	ERS608476_34	HGM	MAG	1747003	74	40243	31.09	99.2	0	NA	0	0	14.35	20	NA	GUT_GENOME132205	MGYG-HGUT-02163	d__Archaea;p__Methanobacteriota;c__Methanobacteria;o__Methanobacteriales;f__Methanobacteriaceae;g__Methanobrevibacter_A;s__Methanobrevibacter_A smithii	ERS608476	ERP008729	Austria	Europe
GUT_GENOME086994	ERS608476_84	HGM	MAG	1130115	345	3929	28.67	74.05	1.6	NA	0	0	0	8	NA	GUT_GENOME132206	MGYG-HGUT-02164	d__Archaea;p__Methanobacteriota;c__Methanobacteria;o__Methanobacteriales;f__Methanobacteriaceae;g__Methanosphaera;s__Methanosphaera stadtmanae	ERS608476	ERP008729	Austria	Europe
GUT_GENOME087102	ERS608481_37	HGM	MAG	1309865	447	3348	32.19	84.15	0.06	NA	0	0	0	16	NA	GUT_GENOME132205	MGYG-HGUT-02163	d__Archaea;p__Methanobacteriota;c__Methanobacteria;o__Methanobacteriales;f__Methanobacteriaceae;g__Methanobrevibacter_A;s__Methanobrevibacter_A smithii	ERS608481	ERP008729	Austria	Europe
GUT_GENOME087174	ERS608483_70	HGM	MAG	1648597	91	29584	31.32	100	0	NA	0	0	0	20	NA	GUT_GENOME132205	MGYG-HGUT-02163	d__Archaea;p__Methanobacteriota;c__Methanobacteria;o__Methanobacteriales;f__Methanobacteriaceae;g__Methanobrevibacter_A;s__Methanobrevibacter_A smithii	ERS608483	ERP008729	Austria	Europe
GUT_GENOME087404	ERS608493_40	HGM	MAG	1715191	34	109697	31.2	100	0	NA	0	0	0	20	NA	GUT_GENOME132205	MGYG-HGUT-02163	d__Archaea;p__Methanobacteriota;c__Methanobacteria;o__Methanobacteriales;f__Methanobacteriaceae;g__Methanobrevibacter_A;s__Methanobrevibacter_A smithii	ERS608493	ERP008729	Austria	Europe
GUT_GENOME087444	ERS608495_101	HGM	MAG	1522854	347	5657	31.57	89	0.06	NA	0	0	0	20	NA	GUT_GENOME132205	MGYG-HGUT-02163	d__Archaea;p__Methanobacteriota;c__Methanobacteria;o__Methanobacteriales;f__Methanobacteriaceae;g__Methanobrevibacter_A;s__Methanobrevibacter_A smithii	ERS608495	ERP008729	Austria	Europe
GUT_GENOME087549	ERS608499_24	HGM	MAG	1610259	213	10805	30.65	95.33	0	NA	0	0	0	17	NA	GUT_GENOME143185	MGYG-HGUT-02446	d__Archaea;p__Methanobacteriota;c__Methanobacteria;o__Methanobacteriales;f__Methanobacteriaceae;g__Methanobrevibacter_A;s__Methanobrevibacter_A smithii_A	ERS608499	ERP008729	Austria	Europe
GUT_GENOME087659	ERS608503_60	HGM	MAG	1856177	70	58365	30.5	98.4	0	NA	0	0	0	20	NA	GUT_GENOME143185	MGYG-HGUT-02446	d__Archaea;p__Methanobacteriota;c__Methanobacteria;o__Methanobacteriales;f__Methanobacteriaceae;g__Methanobrevibacter_A;s__Methanobrevibacter_A smithii_A	ERS608503	ERP008729	Austria	Europe
GUT_GENOME087854	ERS608510_95	HGM	MAG	1682828	76	36925	31.18	99.2	0	NA	0	0	0	20	NA	GUT_GENOME132205	MGYG-HGUT-02163	d__Archaea;p__Methanobacteriota;c__Methanobacteria;o__Methanobacteriales;f__Methanobacteriaceae;g__Methanobrevibacter_A;s__Methanobrevibacter_A smithii	ERS608510	ERP008729	Austria	Europe
GUT_GENOME087972	ERS608517_31	HGM	MAG	1971531	54	61724	30.41	100	0.8	NA	0	0	0	20	NA	GUT_GENOME143185	MGYG-HGUT-02446	d__Archaea;p__Methanobacteriota;c__Methanobacteria;o__Methanobacteriales;f__Methanobacteriaceae;g__Methanobrevibacter_A;s__Methanobrevibacter_A smithii_A	ERS608517	ERP008729	Austria	Europe
GUT_GENOME088140	ERS608524_2	HGM	MAG	1144025	489	2546	32.19	74.82	1.24	NA	0	0	0	9	NA	GUT_GENOME132205	MGYG-HGUT-02163	d__Archaea;p__Methanobacteriota;c__Methanobacteria;o__Methanobacteriales;f__Methanobacteriaceae;g__Methanobrevibacter_A;s__Methanobrevibacter_A smithii	ERS608524	ERP008729	Austria	Europe
GUT_GENOME088211	ERS608526_98	HGM	MAG	1708766	81	32516	30.65	97.6	0	NA	0	0	0	20	NA	GUT_GENOME143185	MGYG-HGUT-02446	d__Archaea;p__Methanobacteriota;c__Methanobacteria;o__Methanobacteriales;f__Methanobacteriaceae;g__Methanobrevibacter_A;s__Methanobrevibacter_A smithii_A	ERS608526	ERP008729	Austria	Europe
GUT_GENOME088370	ERS608534_80	HGM	MAG	1624919	15	173797	31.31	100	0	NA	0	0	0	20	NA	GUT_GENOME132205	MGYG-HGUT-02163	d__Archaea;p__Methanobacteriota;c__Methanobacteria;o__Methanobacteriales;f__Methanobacteriaceae;g__Methanobrevibacter_A;s__Methanobrevibacter_A smithii	ERS608534	ERP008729	Austria	Europe
GUT_GENOME088396	ERS608535_55	HGM	MAG	2006140	67	48800	30.57	99.75	0	NA	0	0	0	20	NA	GUT_GENOME143185	MGYG-HGUT-02446	d__Archaea;p__Methanobacteriota;c__Methanobacteria;o__Methanobacteriales;f__Methanobacteriaceae;g__Methanobrevibacter_A;s__Methanobrevibacter_A smithii_A	ERS608535	ERP008729	Austria	Europe
GUT_GENOME088591	ERS608545_34	HGM	MAG	1855807	104	30024	30.43	98.4	0	NA	0	0	14.35	19	NA	GUT_GENOME143185	MGYG-HGUT-02446	d__Archaea;p__Methanobacteriota;c__Methanobacteria;o__Methanobacteriales;f__Methanobacteriaceae;g__Methanobrevibacter_A;s__Methanobrevibacter_A smithii_A	ERS608545	ERP008729	Austria	Europe
GUT_GENOME088656	ERS608547_16	HGM	MAG	1831133	162	16311	30.34	98.4	0	NA	0	99.8	0	19	NA	GUT_GENOME143185	MGYG-HGUT-02446	d__Archaea;p__Methanobacteriota;c__Methanobacteria;o__Methanobacteriales;f__Methanobacteriaceae;g__Methanobrevibacter_A;s__Methanobrevibacter_A smithii_A	ERS608547	ERP008729	Austria	Europe
GUT_GENOME088738	ERS608549_91	HGM	MAG	1738245	66	52833	31.11	100	0	NA	0	0	0	20	NA	GUT_GENOME132205	MGYG-HGUT-02163	d__Archaea;p__Methanobacteriota;c__Methanobacteria;o__Methanobacteriales;f__Methanobacteriaceae;g__Methanobrevibacter_A;s__Methanobrevibacter_A smithii	ERS608549	ERP008729	Austria	Europe
GUT_GENOME088914	ERS608556_25	HGM	MAG	1140653	486	2581	32.21	76.39	0.8	NA	0	0	0	6	NA	GUT_GENOME132205	MGYG-HGUT-02163	d__Archaea;p__Methanobacteriota;c__Methanobacteria;o__Methanobacteriales;f__Methanobacteriaceae;g__Methanobrevibacter_A;s__Methanobrevibacter_A smithii	ERS608556	ERP008729	Austria	Europe
GUT_GENOME088970	ERS608558_24	HGM	MAG	1665570	352	6005	30.79	94	0	NA	0	0	0	18	NA	GUT_GENOME143185	MGYG-HGUT-02446	d__Archaea;p__Methanobacteriota;c__Methanobacteria;o__Methanobacteriales;f__Methanobacteriaceae;g__Methanobrevibacter_A;s__Methanobrevibacter_A smithii_A	ERS608558	ERP008729	Austria	Europe
GUT_GENOME089099	ERS608564_59	HGM	MAG	1603150	319	6011	31.1	94	0	NA	0	0	99.5	20	NA	GUT_GENOME143185	MGYG-HGUT-02446	d__Archaea;p__Methanobacteriota;c__Methanobacteria;o__Methanobacteriales;f__Methanobacteriaceae;g__Methanobrevibacter_A;s__Methanobrevibacter_A smithii_A	ERS608564	ERP008729	Austria	Europe
GUT_GENOME089164	ERS608567_34	HGM	MAG	1741820	60	46048	31.6	96	0	NA	0	0	0	20	NA	GUT_GENOME132205	MGYG-HGUT-02163	d__Archaea;p__Methanobacteriota;c__Methanobacteria;o__Methanobacteriales;f__Methanobacteriaceae;g__Methanobrevibacter_A;s__Methanobrevibacter_A smithii	ERS608567	ERP008729	Austria	Europe
GUT_GENOME089209	ERS608568_68	HGM	MAG	1911427	134	23486	30.4	99.2	0	NA	0	0	0	20	NA	GUT_GENOME143185	MGYG-HGUT-02446	d__Archaea;p__Methanobacteriota;c__Methanobacteria;o__Methanobacteriales;f__Methanobacteriaceae;g__Methanobrevibacter_A;s__Methanobrevibacter_A smithii_A	ERS608568	ERP008729	Austria	Europe
GUT_GENOME089235	ERS608569_76	HGM	MAG	1700091	146	15956	31.25	99.2	0	NA	0	0	0	20	NA	GUT_GENOME132205	MGYG-HGUT-02163	d__Archaea;p__Methanobacteriota;c__Methanobacteria;o__Methanobacteriales;f__Methanobacteriaceae;g__Methanobrevibacter_A;s__Methanobrevibacter_A smithii	ERS608569	ERP008729	Austria	Europe
GUT_GENOME089303	ERS608572_37	HGM	MAG	1503225	21	111313	30.71	96	0	0.18	0	0	0	19	NA	GUT_GENOME143185	MGYG-HGUT-02446	d__Archaea;p__Methanobacteriota;c__Methanobacteria;o__Methanobacteriales;f__Methanobacteriaceae;g__Methanobrevibacter_A;s__Methanobrevibacter_A smithii_A	ERS608572	ERP008729	Austria	Europe
GUT_GENOME089352	ERS608574_37	HGM	MAG	1786277	41	75546	30.92	100	0	NA	0	0	0	20	NA	GUT_GENOME132205	MGYG-HGUT-02163	d__Archaea;p__Methanobacteriota;c__Methanobacteria;o__Methanobacteriales;f__Methanobacteriaceae;g__Methanobrevibacter_A;s__Methanobrevibacter_A smithii	ERS608574	ERP008729	Austria	Europe
GUT_GENOME089437	ERS608577_22	HGM	MAG	1834692	36	120985	31.01	100	0	0.44	0	0	0	20	NA	GUT_GENOME132205	MGYG-HGUT-02163	d__Archaea;p__Methanobacteriota;c__Methanobacteria;o__Methanobacteriales;f__Methanobacteriaceae;g__Methanobrevibacter_A;s__Methanobrevibacter_A smithii	ERS608577	ERP008729	Austria	Europe
GUT_GENOME089637	ERS608583_45	HGM	MAG	1819534	42	117755	31.01	100	0	NA	0	0	0	20	NA	GUT_GENOME132205	MGYG-HGUT-02163	d__Archaea;p__Methanobacteriota;c__Methanobacteria;o__Methanobacteriales;f__Methanobacteriaceae;g__Methanobrevibacter_A;s__Methanobrevibacter_A smithii	ERS608583	ERP008729	Austria	Europe
GUT_GENOME089701	ERS608585_42	HGM	MAG	1400124	414	4141	31.29	80.76	0.8	NA	0	0	0	19	NA	GUT_GENOME132205	MGYG-HGUT-02163	d__Archaea;p__Methanobacteriota;c__Methanobacteria;o__Methanobacteriales;f__Methanobacteriaceae;g__Methanobrevibacter_A;s__Methanobrevibacter_A smithii	ERS608585	ERP008729	Austria	Europe
GUT_GENOME089786	ERS608589_16	HGM	MAG	1723899	21	223286	31.2	100	0	NA	0	0	0	20	NA	GUT_GENOME132205	MGYG-HGUT-02163	d__Archaea;p__Methanobacteriota;c__Methanobacteria;o__Methanobacteriales;f__Methanobacteriaceae;g__Methanobrevibacter_A;s__Methanobrevibacter_A smithii	ERS608589	ERP008729	Austria	Europe
GUT_GENOME089958	ERS608594_68	HGM	MAG	1625606	18	122931	30.45	94.4	0	NA	0	0	0	20	NA	GUT_GENOME143185	MGYG-HGUT-02446	d__Archaea;p__Methanobacteriota;c__Methanobacteria;o__Methanobacteriales;f__Methanobacteriaceae;g__Methanobrevibacter_A;s__Methanobrevibacter_A smithii_A	ERS608594	ERP008729	Austria	Europe
GUT_GENOME090000	ERS608596_31	HGM	MAG	1638625	416	5019	30.7	92	0.8	NA	0	0	0	18	NA	GUT_GENOME143185	MGYG-HGUT-02446	d__Archaea;p__Methanobacteriota;c__Methanobacteria;o__Methanobacteriales;f__Methanobacteriaceae;g__Methanobrevibacter_A;s__Methanobrevibacter_A smithii_A	ERS608596	ERP008729	Austria	Europe
GUT_GENOME090243	ERS608604_47	HGM	MAG	1676173	27	94178	30.56	99.2	0	NA	0	0	0	20	NA	GUT_GENOME143185	MGYG-HGUT-02446	d__Archaea;p__Methanobacteriota;c__Methanobacteria;o__Methanobacteriales;f__Methanobacteriaceae;g__Methanobrevibacter_A;s__Methanobrevibacter_A smithii_A	ERS608604	ERP008729	Austria	Europe
GUT_GENOME090306	ERS608606_29	HGM	MAG	1836038	84	30863	30.31	100	0	NA	0	0	0	20	NA	GUT_GENOME143185	MGYG-HGUT-02446	d__Archaea;p__Methanobacteriota;c__Methanobacteria;o__Methanobacteriales;f__Methanobacteriaceae;g__Methanobrevibacter_A;s__Methanobrevibacter_A smithii_A	ERS608606	ERP008729	Austria	Europe
GUT_GENOME090367	ERS608607_80	HGM	MAG	1885576	58	59379	30.26	100	0	0	0	0	0	20	NA	GUT_GENOME143185	MGYG-HGUT-02446	d__Archaea;p__Methanobacteriota;c__Methanobacteria;o__Methanobacteriales;f__Methanobacteriaceae;g__Methanobrevibacter_A;s__Methanobrevibacter_A smithii_A	ERS608607	ERP008729	Austria	Europe
GUT_GENOME090436	ERS608610_93	HGM	MAG	1616738	209	10142	31.63	94	0	NA	0	99.8	99.5	19	NA	GUT_GENOME132205	MGYG-HGUT-02163	d__Archaea;p__Methanobacteriota;c__Methanobacteria;o__Methanobacteriales;f__Methanobacteriaceae;g__Methanobrevibacter_A;s__Methanobrevibacter_A smithii	ERS608610	ERP008729	Austria	Europe
GUT_GENOME090576	ERS608615_62	HGM	MAG	1869655	54	65099	30.28	100	0	0	0	0	0	20	NA	GUT_GENOME143185	MGYG-HGUT-02446	d__Archaea;p__Methanobacteriota;c__Methanobacteria;o__Methanobacteriales;f__Methanobacteriaceae;g__Methanobrevibacter_A;s__Methanobrevibacter_A smithii_A	ERS608615	ERP008729	Austria	Europe
GUT_GENOME090618	ERS608618_36	HGM	MAG	1644755	65	44246	31.3	97.6	0	NA	0	0	0	20	NA	GUT_GENOME132205	MGYG-HGUT-02163	d__Archaea;p__Methanobacteriota;c__Methanobacteria;o__Methanobacteriales;f__Methanobacteriaceae;g__Methanobrevibacter_A;s__Methanobrevibacter_A smithii	ERS608618	ERP008729	Austria	Europe
GUT_GENOME090753	ERS631829_41	HGM	MAG	1107375	473	2566	31.44	69.83	0.4	NA	0	0	0	12	NA	GUT_GENOME132205	MGYG-HGUT-02163	d__Archaea;p__Methanobacteriota;c__Methanobacteria;o__Methanobacteriales;f__Methanobacteriaceae;g__Methanobrevibacter_A;s__Methanobrevibacter_A smithii	ERS631829	ERP008729	Austria	Europe
GUT_GENOME090851	ERS631833_67	HGM	MAG	1407245	14	136659	31.37	84	0	NA	0	0	0	20	NA	GUT_GENOME132205	MGYG-HGUT-02163	d__Archaea;p__Methanobacteriota;c__Methanobacteria;o__Methanobacteriales;f__Methanobacteriaceae;g__Methanobrevibacter_A;s__Methanobrevibacter_A smithii	ERS631833	ERP008729	Austria	Europe
GUT_GENOME090886	ERS631834_70	HGM	MAG	1379626	27	74625	30.75	84	0	NA	0	0	0	19	NA	GUT_GENOME143185	MGYG-HGUT-02446	d__Archaea;p__Methanobacteriota;c__Methanobacteria;o__Methanobacteriales;f__Methanobacteriaceae;g__Methanobrevibacter_A;s__Methanobrevibacter_A smithii_A	ERS631834	ERP008729	Austria	Europe
GUT_GENOME090920	FengQ_2015__SID31009__bin.2	CIBIO	MAG	1681508	115	24822	30.72	97.6	0	0.22	0	0	0	20	NA	GUT_GENOME143185	MGYG-HGUT-02446	d__Archaea;p__Methanobacteriota;c__Methanobacteria;o__Methanobacteriales;f__Methanobacteriaceae;g__Methanobrevibacter_A;s__Methanobrevibacter_A smithii_A	ERS608499	ERP008729	Austria	Europe
GUT_GENOME091148	FengQ_2015__SID31160__bin.60	CIBIO	MAG	1989768	501	4841	31.7	89.02	2.4	0.33	0	0	0	18	NA	GUT_GENOME132205	MGYG-HGUT-02163	d__Archaea;p__Methanobacteriota;c__Methanobacteria;o__Methanobacteriales;f__Methanobacteriaceae;g__Methanobrevibacter_A;s__Methanobrevibacter_A smithii	ERS608481	ERP008729	Austria	Europe
GUT_GENOME091220	FengQ_2015__SID31223__bin.1	CIBIO	MAG	1724397	8	1319993	31.17	100	0	0.05	0	0	0	20	NA	GUT_GENOME132205	MGYG-HGUT-02163	d__Archaea;p__Methanobacteriota;c__Methanobacteria;o__Methanobacteriales;f__Methanobacteriaceae;g__Methanobrevibacter_A;s__Methanobrevibacter_A smithii	ERS608589	ERP008729	Austria	Europe
GUT_GENOME091411	FengQ_2015__SID31275__bin.65	CIBIO	MAG	1823402	257	9868	30.81	96.8	0	0.16	0	99.8	99.5	19	NA	GUT_GENOME143185	MGYG-HGUT-02446	d__Archaea;p__Methanobacteriota;c__Methanobacteria;o__Methanobacteriales;f__Methanobacteriaceae;g__Methanobrevibacter_A;s__Methanobrevibacter_A smithii_A	ERS608558	ERP008729	Austria	Europe
GUT_GENOME091441	FengQ_2015__SID31276__bin.5	CIBIO	MAG	1257456	6	258006	30.73	75.2	0	0.1	0	0	0	17	NA	GUT_GENOME143185	MGYG-HGUT-02446	d__Archaea;p__Methanobacteriota;c__Methanobacteria;o__Methanobacteriales;f__Methanobacteriaceae;g__Methanobrevibacter_A;s__Methanobrevibacter_A smithii_A	ERS608594	ERP008729	Austria	Europe
GUT_GENOME091533	FengQ_2015__SID31300__bin.14	CIBIO	MAG	1658492	222	10769	31.43	94.4	1.6	0.17	0	99.8	0	20	NA	GUT_GENOME132205	MGYG-HGUT-02163	d__Archaea;p__Methanobacteriota;c__Methanobacteria;o__Methanobacteriales;f__Methanobacteriaceae;g__Methanobrevibacter_A;s__Methanobrevibacter_A smithii	ERS608495	ERP008729	Austria	Europe
GUT_GENOME091638	FengQ_2015__SID31333__bin.7	CIBIO	MAG	1278961	330	4326	31.81	80.05	0	0.22	0	0	0	18	NA	GUT_GENOME132205	MGYG-HGUT-02163	d__Archaea;p__Methanobacteriota;c__Methanobacteria;o__Methanobacteriales;f__Methanobacteriaceae;g__Methanobrevibacter_A;s__Methanobrevibacter_A smithii	ERS608524	ERP008729	Austria	Europe
GUT_GENOME092034	FengQ_2015__SID31489__bin.40	CIBIO	MAG	1759372	49	59607	30.44	100	0.8	0.11	0	0	0	20	NA	GUT_GENOME143185	MGYG-HGUT-02446	d__Archaea;p__Methanobacteriota;c__Methanobacteria;o__Methanobacteriales;f__Methanobacteriaceae;g__Methanobrevibacter_A;s__Methanobrevibacter_A smithii_A	ERS608606	ERP008729	Austria	Europe
GUT_GENOME092159	FengQ_2015__SID31549__bin.38	CIBIO	MAG	1655628	92	30792	31.34	100	0.8	0.07	0	0	0	20	NA	GUT_GENOME132205	MGYG-HGUT-02163	d__Archaea;p__Methanobacteriota;c__Methanobacteria;o__Methanobacteriales;f__Methanobacteriaceae;g__Methanobrevibacter_A;s__Methanobrevibacter_A smithii	ERS608579	ERP008729	Austria	Europe
GUT_GENOME092191	FengQ_2015__SID31582__bin.20	CIBIO	MAG	1699376	29	98354	31.19	100	0	0.05	0	21.06	0	20	NA	GUT_GENOME132205	MGYG-HGUT-02163	d__Archaea;p__Methanobacteriota;c__Methanobacteria;o__Methanobacteriales;f__Methanobacteriaceae;g__Methanobrevibacter_A;s__Methanobrevibacter_A smithii	ERS608567	ERP008729	Austria	Europe
GUT_GENOME092268	FengQ_2015__SID31685__bin.6	CIBIO	MAG	1881231	27	118807	30.3	100	0	0.12	0	0	0	20	NA	GUT_GENOME143185	MGYG-HGUT-02446	d__Archaea;p__Methanobacteriota;c__Methanobacteria;o__Methanobacteriales;f__Methanobacteriaceae;g__Methanobrevibacter_A;s__Methanobrevibacter_A smithii_A	ERS608607	ERP008729	Austria	Europe
GUT_GENOME092288	FengQ_2015__SID31700__bin.65	CIBIO	MAG	1653804	41	68708	31.32	100	0	0.08	0	21.06	0	20	NA	GUT_GENOME132205	MGYG-HGUT-02163	d__Archaea;p__Methanobacteriota;c__Methanobacteria;o__Methanobacteriales;f__Methanobacteriaceae;g__Methanobrevibacter_A;s__Methanobrevibacter_A smithii	ERS608483	ERP008729	Austria	Europe
GUT_GENOME092376	FengQ_2015__SID31749__bin.62	CIBIO	MAG	1829642	42	75261	30.33	99.2	0	0.1	0	0	0	20	NA	GUT_GENOME143185	MGYG-HGUT-02446	d__Archaea;p__Methanobacteriota;c__Methanobacteria;o__Methanobacteriales;f__Methanobacteriaceae;g__Methanobrevibacter_A;s__Methanobrevibacter_A smithii_A	ERS608503	ERP008729	Austria	Europe
GUT_GENOME092500	FengQ_2015__SID31866__bin.72	CIBIO	MAG	1198072	15	130967	30.7	54.4	0	0.06	0	0	0	13	NA	GUT_GENOME132205	MGYG-HGUT-02163	d__Archaea;p__Methanobacteriota;c__Methanobacteria;o__Methanobacteriales;f__Methanobacteriaceae;g__Methanobrevibacter_A;s__Methanobrevibacter_A smithii	ERS608577	ERP008729	Austria	Europe
GUT_GENOME092523	FengQ_2015__SID31868__bin.50	CIBIO	MAG	1310289	185	9989	31.75	89.04	0.16	0.13	0	0	0	18	NA	GUT_GENOME132205	MGYG-HGUT-02163	d__Archaea;p__Methanobacteriota;c__Methanobacteria;o__Methanobacteriales;f__Methanobacteriaceae;g__Methanobrevibacter_A;s__Methanobrevibacter_A smithii	ERS608585	ERP008729	Austria	Europe
GUT_GENOME092830	FengQ_2015__SID31879__bin.2	CIBIO	MAG	1747999	53	61909	31.25	100	0	0.04	0	0	0	20	NA	GUT_GENOME132205	MGYG-HGUT-02163	d__Archaea;p__Methanobacteriota;c__Methanobacteria;o__Methanobacteriales;f__Methanobacteriaceae;g__Methanobrevibacter_A;s__Methanobrevibacter_A smithii	ERS608618	ERP008729	Austria	Europe
GUT_GENOME092846	FengQ_2015__SID31880__bin.10	CIBIO	MAG	1344339	383	3946	32.03	76.8	0.06	0.29	0	0	0	14	NA	GUT_GENOME132205	MGYG-HGUT-02163	d__Archaea;p__Methanobacteriota;c__Methanobacteria;o__Methanobacteriales;f__Methanobacteriaceae;g__Methanobrevibacter_A;s__Methanobrevibacter_A smithii	ERS608612	ERP008729	Austria	Europe
GUT_GENOME092952	FengQ_2015__SID31884__bin.24	CIBIO	MAG	1967310	23	144674	30.22	100	0	0.11	0	0	0	20	NA	GUT_GENOME143185	MGYG-HGUT-02446	d__Archaea;p__Methanobacteriota;c__Methanobacteria;o__Methanobacteriales;f__Methanobacteriaceae;g__Methanobrevibacter_A;s__Methanobrevibacter_A smithii_A	ERS608604	ERP008729	Austria	Europe
GUT_GENOME093033	FengQ_2015__SID530026__bin.59	CIBIO	MAG	1840848	93	35006	30.46	100	0	0.14	0	99.8	99.5	19	NA	GUT_GENOME143185	MGYG-HGUT-02446	d__Archaea;p__Methanobacteriota;c__Methanobacteria;o__Methanobacteriales;f__Methanobacteriaceae;g__Methanobrevibacter_A;s__Methanobrevibacter_A smithii_A	ERS608547	ERP008729	Austria	Europe
GUT_GENOME093107	FengQ_2015__SID530041__bin.35	CIBIO	MAG	1884570	25	99179	30.29	100	0	0.11	0	0	0	20	NA	GUT_GENOME143185	MGYG-HGUT-02446	d__Archaea;p__Methanobacteriota;c__Methanobacteria;o__Methanobacteriales;f__Methanobacteriaceae;g__Methanobrevibacter_A;s__Methanobrevibacter_A smithii_A	ERS608572	ERP008729	Austria	Europe
GUT_GENOME093215	FengQ_2015__SID530054__bin.35	CIBIO	MAG	1838137	45	63028	31.22	100	0	0.05	0	99.8	99.5	20	NA	GUT_GENOME132205	MGYG-HGUT-02163	d__Archaea;p__Methanobacteriota;c__Methanobacteria;o__Methanobacteriales;f__Methanobacteriaceae;g__Methanobrevibacter_A;s__Methanobrevibacter_A smithii	ERS608549	ERP008729	Austria	Europe
GUT_GENOME093244	FengQ_2015__SID530055__bin.22	CIBIO	MAG	1816052	53	55240	30.55	100	0	0.1	0	0	0	20	NA	GUT_GENOME143185	MGYG-HGUT-02446	d__Archaea;p__Methanobacteriota;c__Methanobacteria;o__Methanobacteriales;f__Methanobacteriaceae;g__Methanobrevibacter_A;s__Methanobrevibacter_A smithii_A	ERS608526	ERP008729	Austria	Europe
GUT_GENOME093513	FengQ_2015__SID530185__bin.22	CIBIO	MAG	1739401	6	1099874	31.18	100	0	0.04	0	0	0	20	NA	GUT_GENOME132205	MGYG-HGUT-02163	d__Archaea;p__Methanobacteriota;c__Methanobacteria;o__Methanobacteriales;f__Methanobacteriaceae;g__Methanobrevibacter_A;s__Methanobrevibacter_A smithii	ERS608534	ERP008729	Austria	Europe
GUT_GENOME093560	FengQ_2015__SID530215__bin.41	CIBIO	MAG	1140131	363	3429	28.83	68.45	0.8	0.81	0	0	0	6	NA	GUT_GENOME132206	MGYG-HGUT-02164	d__Archaea;p__Methanobacteriota;c__Methanobacteria;o__Methanobacteriales;f__Methanobacteriaceae;g__Methanosphaera;s__Methanosphaera stadtmanae	ERS608517	ERP008729	Austria	Europe
GUT_GENOME093561	FengQ_2015__SID530215__bin.48	CIBIO	MAG	1972749	37	100981	30.42	100	0	0.11	0	0	10.7	20	NA	GUT_GENOME143185	MGYG-HGUT-02446	d__Archaea;p__Methanobacteriota;c__Methanobacteria;o__Methanobacteriales;f__Methanobacteriaceae;g__Methanobrevibacter_A;s__Methanobrevibacter_A smithii_A	ERS608517	ERP008729	Austria	Europe
GUT_GENOME093679	FengQ_2015__SID530295__bin.45	CIBIO	MAG	1800275	16	255513	31.07	100	0.8	0.06	0	0	0	20	NA	GUT_GENOME132205	MGYG-HGUT-02163	d__Archaea;p__Methanobacteriota;c__Methanobacteria;o__Methanobacteriales;f__Methanobacteriaceae;g__Methanobrevibacter_A;s__Methanobrevibacter_A smithii	ERS608493	ERP008729	Austria	Europe
GUT_GENOME093728	FengQ_2015__SID530297__bin.46	CIBIO	MAG	881193	363	2423	29.48	59.01	1.6	1.12	0	0	0	5	NA	GUT_GENOME132206	MGYG-HGUT-02164	d__Archaea;p__Methanobacteriota;c__Methanobacteria;o__Methanobacteriales;f__Methanobacteriaceae;g__Methanosphaera;s__Methanosphaera stadtmanae	ERS608545	ERP008729	Austria	Europe
GUT_GENOME093912	FengQ_2015__SID530373__bin.70	CIBIO	MAG	1718078	9	284702	31.06	100	0	0.06	0	0	0	20	NA	GUT_GENOME132205	MGYG-HGUT-02163	d__Archaea;p__Methanobacteriota;c__Methanobacteria;o__Methanobacteriales;f__Methanobacteriaceae;g__Methanobrevibacter_A;s__Methanobrevibacter_A smithii	ERS608583	ERP008729	Austria	Europe
GUT_GENOME094058	FengQ_2015__SID530450__bin.31	CIBIO	MAG	1901911	87	35352	30.35	100	0	0.13	0	0	0	20	NA	GUT_GENOME143185	MGYG-HGUT-02446	d__Archaea;p__Methanobacteriota;c__Methanobacteria;o__Methanobacteriales;f__Methanobacteriaceae;g__Methanobrevibacter_A;s__Methanobrevibacter_A smithii_A	ERS608568	ERP008729	Austria	Europe
GUT_GENOME094117	FengQ_2015__SID530451__bin.89	CIBIO	MAG	811163	9	88035	31.6	55.2	0	0.06	0	0	0	15	NA	GUT_GENOME132205	MGYG-HGUT-02163	d__Archaea;p__Methanobacteriota;c__Methanobacteria;o__Methanobacteriales;f__Methanobacteriaceae;g__Methanobrevibacter_A;s__Methanobrevibacter_A smithii	ERS608510	ERP008729	Austria	Europe
GUT_GENOME094182	FengQ_2015__SID530600__bin.69	CIBIO	MAG	1047689	25	49662	29.94	53.66	0	0.07	0	0	0	9	NA	GUT_GENOME143185	MGYG-HGUT-02446	d__Archaea;p__Methanobacteriota;c__Methanobacteria;o__Methanobacteriales;f__Methanobacteriaceae;g__Methanobrevibacter_A;s__Methanobrevibacter_A smithii_A	ERS608535	ERP008729	Austria	Europe
GUT_GENOME094216	FengQ_2015__SID530623__bin.51	CIBIO	MAG	1674089	92	31499	31.28	99.2	0	0.04	0	0	0	20	NA	GUT_GENOME132205	MGYG-HGUT-02163	d__Archaea;p__Methanobacteriota;c__Methanobacteria;o__Methanobacteriales;f__Methanobacteriaceae;g__Methanobrevibacter_A;s__Methanobrevibacter_A smithii	ERS608569	ERP008729	Austria	Europe
GUT_GENOME094374	FengQ_2015__SID530840__bin.23	CIBIO	MAG	1794739	21	174190	30.92	100	0	0.05	0	0	0	20	NA	GUT_GENOME132205	MGYG-HGUT-02163	d__Archaea;p__Methanobacteriota;c__Methanobacteria;o__Methanobacteriales;f__Methanobacteriaceae;g__Methanobrevibacter_A;s__Methanobrevibacter_A smithii	ERS608574	ERP008729	Austria	Europe
GUT_GENOME094496	FengQ_2015__SID531128__bin.24	CIBIO	MAG	1784061	204	11897	31.48	98	0.8	0.06	0	99.8	99.5	19	NA	GUT_GENOME132205	MGYG-HGUT-02163	d__Archaea;p__Methanobacteriota;c__Methanobacteria;o__Methanobacteriales;f__Methanobacteriaceae;g__Methanobrevibacter_A;s__Methanobrevibacter_A smithii	ERS608610	ERP008729	Austria	Europe
GUT_GENOME094686	FengQ_2015__SID531352__bin.50	CIBIO	MAG	1867104	26	88766	30.29	100	0	0.09	0	0	0	20	NA	GUT_GENOME143185	MGYG-HGUT-02446	d__Archaea;p__Methanobacteriota;c__Methanobacteria;o__Methanobacteriales;f__Methanobacteriaceae;g__Methanobrevibacter_A;s__Methanobrevibacter_A smithii_A	ERS608615	ERP008729	Austria	Europe
GUT_GENOME094720	FengQ_2015__SID531382__bin.19	CIBIO	MAG	1796455	295	8126	30.68	98.4	0.8	0.29	0	99.8	99.5	18	NA	GUT_GENOME143185	MGYG-HGUT-02446	d__Archaea;p__Methanobacteriota;c__Methanobacteria;o__Methanobacteriales;f__Methanobacteriaceae;g__Methanobrevibacter_A;s__Methanobrevibacter_A smithii_A	ERS608596	ERP008729	Austria	Europe
GUT_GENOME094853	FengQ_2015__SID531663__bin.28	CIBIO	MAG	872017	11	204994	30.87	50.4	0	0.15	0	0	0	14	NA	GUT_GENOME143185	MGYG-HGUT-02446	d__Archaea;p__Methanobacteriota;c__Methanobacteria;o__Methanobacteriales;f__Methanobacteriaceae;g__Methanobrevibacter_A;s__Methanobrevibacter_A smithii_A	ERS631834	ERP008729	Austria	Europe
GUT_GENOME095081	FengQ_2015__SID532802__bin.68	CIBIO	MAG	1277665	315	5026	31.54	72.13	0	0.86	0	0	0	14	NA	GUT_GENOME132205	MGYG-HGUT-02163	d__Archaea;p__Methanobacteriota;c__Methanobacteria;o__Methanobacteriales;f__Methanobacteriaceae;g__Methanobrevibacter_A;s__Methanobrevibacter_A smithii	ERS631829	ERP008729	Austria	Europe
GUT_GENOME095171	FengQ_2015__SID532915__bin.68	CIBIO	MAG	1536492	8	304999	31.02	79.2	0	0.05	0	0	0	18	NA	GUT_GENOME132205	MGYG-HGUT-02163	d__Archaea;p__Methanobacteriota;c__Methanobacteria;o__Methanobacteriales;f__Methanobacteriaceae;g__Methanobrevibacter_A;s__Methanobrevibacter_A smithii	ERS631833	ERP008729	Austria	Europe
GUT_GENOME096906	GeversD_2014__SKBSTL024__bin.51	CIBIO	MAG	1810330	173	16631	30.45	100	0.06	0.02	0	0	0	20	NA	GUT_GENOME143185	MGYG-HGUT-02446	d__Archaea;p__Methanobacteriota;c__Methanobacteria;o__Methanobacteriales;f__Methanobacteriaceae;g__Methanobrevibacter_A;s__Methanobrevibacter_A smithii_A	SRS584971	SRP040765	United States	North America
GUT_GENOME099122	HeQ_2017__SZAXPI029560-51__bin.44	CIBIO	MAG	1742125	28	118679	31.21	100	0	0.01	0	0	0	20	NA	GUT_GENOME132205	MGYG-HGUT-02163	d__Archaea;p__Methanobacteriota;c__Methanobacteria;o__Methanobacteriales;f__Methanobacteriaceae;g__Methanobrevibacter_A;s__Methanobrevibacter_A smithii	ERS1343393	ERP017091	China	Asia
GUT_GENOME100276	H_massiliense_CSTE01	NCBI	Isolate	3991456	29	244651	66.34	99.25	0	NA	93.28	99.86	99.4	20	GCF_001368915	GUT_GENOME100276	MGYG-HGUT-01639	d__Archaea;p__Halobacteriota;c__Halobacteria;o__Halobacteriales;f__Haloferacaceae;g__Haloferax;s__Haloferax massiliensis	SAMEA3309464	PRJNA224116	NA	NA
GUT_GENOME100729	HMP_2012__SRS014235__bin.70	CIBIO	MAG	1243437	391	3644	30.84	77.51	0.86	0.15	0	0	10.1	15	NA	GUT_GENOME143185	MGYG-HGUT-02446	d__Archaea;p__Methanobacteriota;c__Methanobacteria;o__Methanobacteriales;f__Methanobacteriaceae;g__Methanobrevibacter_A;s__Methanobrevibacter_A smithii_A	SRS014235	SRP175119	United States	North America
GUT_GENOME100871	HMP_2012__SRS014923__bin.64	CIBIO	MAG	1725973	74	41906	31.1	100	0.8	0.02	0	0	0	20	NA	GUT_GENOME132205	MGYG-HGUT-02163	d__Archaea;p__Methanobacteriota;c__Methanobacteria;o__Methanobacteriales;f__Methanobacteriaceae;g__Methanobrevibacter_A;s__Methanobrevibacter_A smithii	SRS014923	SRP002163	United States	North America
GUT_GENOME100890	HMP_2012__SRS014979__bin.34	CIBIO	MAG	1989641	276	9106	31.15	94.13	4.8	0.07	0	0	0	20	NA	GUT_GENOME132205	MGYG-HGUT-02163	d__Archaea;p__Methanobacteriota;c__Methanobacteria;o__Methanobacteriales;f__Methanobacteriaceae;g__Methanobrevibacter_A;s__Methanobrevibacter_A smithii	SRS014979	SRP175119	United States	North America
GUT_GENOME102627	HMP_2012__SRS048870__bin.16	CIBIO	MAG	1762272	33	128030	41.4	98.79	0.81	0	92.44	99.86	99.03	20	NA	GUT_GENOME132202	MGYG-HGUT-02160	d__Archaea;p__Thermoplasmatota;c__Thermoplasmata;o__Methanomassiliicoccales;f__Methanomassiliicoccaceae;g__Methanomassiliicoccus_A;s__Methanomassiliicoccus_A intestinalis	SRS048870	SRP002163	United States	North America
GUT_GENOME103290	HMP_2012__SRS065504__bin.23	CIBIO	MAG	1529806	280	7413	41.22	84.83	2.42	0.01	92.44	0	24.88	20	NA	GUT_GENOME132202	MGYG-HGUT-02160	d__Archaea;p__Thermoplasmatota;c__Thermoplasmata;o__Methanomassiliicoccales;f__Methanomassiliicoccaceae;g__Methanomassiliicoccus_A;s__Methanomassiliicoccus_A intestinalis	SRS065504	SRP175119	United States	North America
GUT_GENOME103380	IjazUZ_2017__S128_a_WGS__bin.13	CIBIO	MAG	1619708	437	4137	32.06	80.7	1.2	0.1	0	0	0	17	NA	GUT_GENOME132205	MGYG-HGUT-02163	d__Archaea;p__Methanobacteriota;c__Methanobacteria;o__Methanobacteriales;f__Methanobacteriaceae;g__Methanobrevibacter_A;s__Methanobrevibacter_A smithii	ERS1491648	ERP020739	United Kingdom	Europe
GUT_GENOME103396	IjazUZ_2017__S138_a_WGS__bin.13	CIBIO	MAG	1703652	201	14924	31.33	98.13	1.6	0.08	0	97.83	0	20	NA	GUT_GENOME132205	MGYG-HGUT-02163	d__Archaea;p__Methanobacteriota;c__Methanobacteria;o__Methanobacteriales;f__Methanobacteriaceae;g__Methanobrevibacter_A;s__Methanobrevibacter_A smithii	ERS1491674	ERP020739	United Kingdom	Europe
GUT_GENOME103408	IjazUZ_2017__S140_a_WGS__bin.1	CIBIO	MAG	2142137	449	6387	31.23	96.4	2.4	0.06	0	98.71	0	16	NA	GUT_GENOME132205	MGYG-HGUT-02163	d__Archaea;p__Methanobacteriota;c__Methanobacteria;o__Methanobacteriales;f__Methanobacteriaceae;g__Methanobrevibacter_A;s__Methanobrevibacter_A smithii	ERS1491681	ERP020739	United Kingdom	Europe
GUT_GENOME103448	IjazUZ_2017__S154_a_WGS__bin.12	CIBIO	MAG	1660171	237	10275	31.36	96.4	1.6	0.06	0	0	0	20	NA	GUT_GENOME132205	MGYG-HGUT-02163	d__Archaea;p__Methanobacteriota;c__Methanobacteria;o__Methanobacteriales;f__Methanobacteriaceae;g__Methanobrevibacter_A;s__Methanobrevibacter_A smithii	ERS1491728	ERP020739	United Kingdom	Europe
GUT_GENOME103466	IjazUZ_2017__S159_a_WGS__bin.29	CIBIO	MAG	1719870	277	8473	30.6	97.33	0.8	0.1	0	0	0	18	NA	GUT_GENOME143185	MGYG-HGUT-02446	d__Archaea;p__Methanobacteriota;c__Methanobacteria;o__Methanobacteriales;f__Methanobacteriaceae;g__Methanobrevibacter_A;s__Methanobrevibacter_A smithii_A	ERS1491743	ERP020739	United Kingdom	Europe
GUT_GENOME103491	IjazUZ_2017__S166_a_WGS__bin.6	CIBIO	MAG	1369080	405	3781	30.97	84.17	1.53	0.07	0	0	0	15	NA	GUT_GENOME143185	MGYG-HGUT-02446	d__Archaea;p__Methanobacteriota;c__Methanobacteria;o__Methanobacteriales;f__Methanobacteriaceae;g__Methanobrevibacter_A;s__Methanobrevibacter_A smithii_A	ERS1491767	ERP020739	United Kingdom	Europe
GUT_GENOME103553	IjazUZ_2017__S43_a_WGS__bin.8	CIBIO	MAG	1850838	57	53407	30.23	99.73	0	0.09	0	0	0	20	NA	GUT_GENOME143185	MGYG-HGUT-02446	d__Archaea;p__Methanobacteriota;c__Methanobacteria;o__Methanobacteriales;f__Methanobacteriaceae;g__Methanobrevibacter_A;s__Methanobrevibacter_A smithii_A	ERS1491406	ERP020739	United Kingdom	Europe
GUT_GENOME103637	IjazUZ_2017__S67_a_WGS__bin.10	CIBIO	MAG	1803785	168	17401	31.1	99.73	3.72	0.09	0	0	99.5	18	NA	GUT_GENOME132205	MGYG-HGUT-02163	d__Archaea;p__Methanobacteriota;c__Methanobacteria;o__Methanobacteriales;f__Methanobacteriaceae;g__Methanobrevibacter_A;s__Methanobrevibacter_A smithii	ERS1491486	ERP020739	United Kingdom	Europe
GUT_GENOME103665	IjazUZ_2017__S80_a_WGS__bin.1	CIBIO	MAG	1853118	390	6488	30.72	96.53	1.6	0.08	0	99.8	0	18	NA	GUT_GENOME143185	MGYG-HGUT-02446	d__Archaea;p__Methanobacteriota;c__Methanobacteria;o__Methanobacteriales;f__Methanobacteriaceae;g__Methanobrevibacter_A;s__Methanobrevibacter_A smithii_A	ERS1491523	ERP020739	United Kingdom	Europe
GUT_GENOME103718	IMG_2534682115	PATRIC/IMG	Isolate	3424955	41	148571	68.01	99.3	0.38	NA	94.96	99.86	99.5	20	2534682115	GUT_GENOME103718	MGYG-HGUT-01693	d__Archaea;p__Halobacteriota;c__Halobacteria;o__Halobacteriales;f__Haloferacaceae;g__Halorubrum;s__Halorubrum lipolyticum	SAMN02471632	PRJNA174918	Canada	North America
GUT_GENOME103874	IMG_643886215	PATRIC/IMG	Isolate	1707624	21	186742	31.19	100	0	NA	0	0	0	20	643886215	GUT_GENOME132205	MGYG-HGUT-02163	d__Archaea;p__Methanobacteriota;c__Methanobacteria;o__Methanobacteriales;f__Methanobacteriaceae;g__Methanobrevibacter_A;s__Methanobrevibacter_A smithii	SAMN00008834	PRJNA29303	United States	North America
GUT_GENOME103957	KarlssonFH_2013__S126__bin.6	CIBIO	MAG	1732033	95	29025	31.26	98.4	0	0.12	0	0	10.94	19	NA	GUT_GENOME132205	MGYG-HGUT-02163	d__Archaea;p__Methanobacteriota;c__Methanobacteria;o__Methanobacteriales;f__Methanobacteriaceae;g__Methanobrevibacter_A;s__Methanobrevibacter_A smithii	ERS235616	ERP002469	Germany	Europe
GUT_GENOME103988	KarlssonFH_2013__S131__bin.6	CIBIO	MAG	1816245	57	59868	31.04	100	0	0.08	0	0	0	20	NA	GUT_GENOME132205	MGYG-HGUT-02163	d__Archaea;p__Methanobacteriota;c__Methanobacteria;o__Methanobacteriales;f__Methanobacteriaceae;g__Methanobrevibacter_A;s__Methanobrevibacter_A smithii	ERS235618	ERP002469	Sweden	Europe
GUT_GENOME103991	KarlssonFH_2013__S137__bin.1	CIBIO	MAG	1462615	489	3330	32.06	80.45	0	0.2	92.44	0	8.03	12	NA	GUT_GENOME132205	MGYG-HGUT-02163	d__Archaea;p__Methanobacteriota;c__Methanobacteria;o__Methanobacteriales;f__Methanobacteriaceae;g__Methanobrevibacter_A;s__Methanobrevibacter_A smithii	ERS235632	ERP002469	Sweden	Europe
GUT_GENOME104028	KarlssonFH_2013__S144__bin.24	CIBIO	MAG	1848611	48	85235	30.31	100	0	0.11	0	0	0	20	NA	GUT_GENOME143185	MGYG-HGUT-02446	d__Archaea;p__Methanobacteriota;c__Methanobacteria;o__Methanobacteriales;f__Methanobacteriaceae;g__Methanobrevibacter_A;s__Methanobrevibacter_A smithii_A	ERS235621	ERP002469	Sweden	Europe
GUT_GENOME104204	KarlssonFH_2013__S193__bin.6	CIBIO	MAG	1802115	103	34822	31	100	0	0.12	0	0	0	20	NA	GUT_GENOME132205	MGYG-HGUT-02163	d__Archaea;p__Methanobacteriota;c__Methanobacteria;o__Methanobacteriales;f__Methanobacteriaceae;g__Methanobrevibacter_A;s__Methanobrevibacter_A smithii	ERS235628	ERP002469	Sweden	Europe
GUT_GENOME104260	KarlssonFH_2013__S198__bin.20	CIBIO	MAG	1736613	394	5791	30.64	93.44	2.99	0.42	0	0	0	20	NA	GUT_GENOME143185	MGYG-HGUT-02446	d__Archaea;p__Methanobacteriota;c__Methanobacteria;o__Methanobacteriales;f__Methanobacteriaceae;g__Methanobrevibacter_A;s__Methanobrevibacter_A smithii_A	ERS235631	ERP002469	Sweden	Europe
GUT_GENOME104278	KarlssonFH_2013__S200__bin.25	CIBIO	MAG	1731055	41	62052	31.1	96.8	0	0.05	0	21.06	32.94	20	NA	GUT_GENOME132205	MGYG-HGUT-02163	d__Archaea;p__Methanobacteriota;c__Methanobacteria;o__Methanobacteriales;f__Methanobacteriaceae;g__Methanobrevibacter_A;s__Methanobrevibacter_A smithii	ERS235592	ERP002469	Sweden	Europe
GUT_GENOME104324	KarlssonFH_2013__S224__bin.27	CIBIO	MAG	1215545	109	19661	31.67	85.33	1.6	0.15	0	0	0	17	NA	GUT_GENOME132205	MGYG-HGUT-02163	d__Archaea;p__Methanobacteriota;c__Methanobacteria;o__Methanobacteriales;f__Methanobacteriaceae;g__Methanobrevibacter_A;s__Methanobrevibacter_A smithii	ERS235594	ERP002469	Sweden	Europe
GUT_GENOME104378	KarlssonFH_2013__S231__bin.30	CIBIO	MAG	1781440	28	114220	30.49	100	0	0.09	0	0	0	20	NA	GUT_GENOME143185	MGYG-HGUT-02446	d__Archaea;p__Methanobacteriota;c__Methanobacteria;o__Methanobacteriales;f__Methanobacteriaceae;g__Methanobrevibacter_A;s__Methanobrevibacter_A smithii_A	ERS235598	ERP002469	Sweden	Europe
GUT_GENOME104403	KarlssonFH_2013__S239__bin.9	CIBIO	MAG	1571288	76	41709	31.4	96.8	0	0.11	0	59.31	10.7	20	NA	GUT_GENOME132205	MGYG-HGUT-02163	d__Archaea;p__Methanobacteriota;c__Methanobacteria;o__Methanobacteriales;f__Methanobacteriaceae;g__Methanobrevibacter_A;s__Methanobrevibacter_A smithii	ERS235600	ERP002469	Sweden	Europe
GUT_GENOME104481	KarlssonFH_2013__S263__bin.1	CIBIO	MAG	1088288	7	243627	31.02	55.2	0	0.08	0	0	0	13	NA	GUT_GENOME132205	MGYG-HGUT-02163	d__Archaea;p__Methanobacteriota;c__Methanobacteria;o__Methanobacteriales;f__Methanobacteriaceae;g__Methanobrevibacter_A;s__Methanobrevibacter_A smithii	ERS235605	ERP002469	Sweden	Europe
GUT_GENOME104546	KarlssonFH_2013__S278__bin.26	CIBIO	MAG	1372398	267	6085	31.97	75	0.4	0.22	0	0	0	18	NA	GUT_GENOME132205	MGYG-HGUT-02163	d__Archaea;p__Methanobacteriota;c__Methanobacteria;o__Methanobacteriales;f__Methanobacteriaceae;g__Methanobrevibacter_A;s__Methanobrevibacter_A smithii	ERS235609	ERP002469	Norway	Europe
GUT_GENOME104724	KarlssonFH_2013__S330__bin.12	CIBIO	MAG	1126568	106	13894	31.44	83.33	0.16	0.14	0	0	0	18	NA	GUT_GENOME143185	MGYG-HGUT-02446	d__Archaea;p__Methanobacteriota;c__Methanobacteria;o__Methanobacteriales;f__Methanobacteriaceae;g__Methanobrevibacter_A;s__Methanobrevibacter_A smithii_A	ERS235501	ERP002469	Sweden	Europe
GUT_GENOME104744	KarlssonFH_2013__S332__bin.18	CIBIO	MAG	1762079	39	71273	31	100	0	0.08	0	0	0	20	NA	GUT_GENOME132205	MGYG-HGUT-02163	d__Archaea;p__Methanobacteriota;c__Methanobacteria;o__Methanobacteriales;f__Methanobacteriaceae;g__Methanobrevibacter_A;s__Methanobrevibacter_A smithii	ERS235502	ERP002469	Sweden	Europe
GUT_GENOME104819	KarlssonFH_2013__S350__bin.15	CIBIO	MAG	1390208	16	170684	30.82	84	0	0.13	0	0	0	18	NA	GUT_GENOME143185	MGYG-HGUT-02446	d__Archaea;p__Methanobacteriota;c__Methanobacteria;o__Methanobacteriales;f__Methanobacteriaceae;g__Methanobrevibacter_A;s__Methanobrevibacter_A smithii_A	ERS235507	ERP002469	Sweden	Europe
GUT_GENOME104888	KarlssonFH_2013__S365__bin.31	CIBIO	MAG	1866049	43	68491	30.35	100	0	0.13	0	0	0	20	NA	GUT_GENOME143185	MGYG-HGUT-02446	d__Archaea;p__Methanobacteriota;c__Methanobacteria;o__Methanobacteriales;f__Methanobacteriaceae;g__Methanobrevibacter_A;s__Methanobrevibacter_A smithii_A	ERS235511	ERP002469	Sweden	Europe
GUT_GENOME104972	KarlssonFH_2013__S380__bin.27	CIBIO	MAG	1204933	369	3596	32.23	71.67	1.94	0.69	0	99.8	99.5	15	NA	GUT_GENOME132205	MGYG-HGUT-02163	d__Archaea;p__Methanobacteriota;c__Methanobacteria;o__Methanobacteriales;f__Methanobacteriaceae;g__Methanobrevibacter_A;s__Methanobrevibacter_A smithii	ERS235516	ERP002469	Sweden	Europe
GUT_GENOME104988	KarlssonFH_2013__S381__bin.4	CIBIO	MAG	1757410	16	218010	31.17	100	0	0.05	0	0	99.5	20	NA	GUT_GENOME132205	MGYG-HGUT-02163	d__Archaea;p__Methanobacteriota;c__Methanobacteria;o__Methanobacteriales;f__Methanobacteriaceae;g__Methanobrevibacter_A;s__Methanobrevibacter_A smithii	ERS235517	ERP002469	Sweden	Europe
GUT_GENOME105044	KarlssonFH_2013__S397__bin.15	CIBIO	MAG	1748656	55	50168	31.12	100	0	0.1	0	99.8	99.5	20	NA	GUT_GENOME132205	MGYG-HGUT-02163	d__Archaea;p__Methanobacteriota;c__Methanobacteria;o__Methanobacteriales;f__Methanobacteriaceae;g__Methanobrevibacter_A;s__Methanobrevibacter_A smithii	ERS235522	ERP002469	Sweden	Europe
GUT_GENOME105213	KarlssonFH_2013__S436__bin.16	CIBIO	MAG	744991	7	135458	31.65	52	0	0.03	0	0	0	15	NA	GUT_GENOME132205	MGYG-HGUT-02163	d__Archaea;p__Methanobacteriota;c__Methanobacteria;o__Methanobacteriales;f__Methanobacteriaceae;g__Methanobrevibacter_A;s__Methanobrevibacter_A smithii	ERS235530	ERP002469	Sweden	Europe
GUT_GENOME105435	KarlssonFH_2013__S458__bin.9	CIBIO	MAG	1798107	41	70138	30.95	100	0	0.08	0	0	0	20	NA	GUT_GENOME132205	MGYG-HGUT-02163	d__Archaea;p__Methanobacteriota;c__Methanobacteria;o__Methanobacteriales;f__Methanobacteriaceae;g__Methanobrevibacter_A;s__Methanobrevibacter_A smithii	ERS235537	ERP002469	Sweden	Europe
GUT_GENOME105440	KarlssonFH_2013__S462__bin.1	CIBIO	MAG	1300379	357	4214	31.55	72.8	0	0.65	0	0	0	18	NA	GUT_GENOME132205	MGYG-HGUT-02163	d__Archaea;p__Methanobacteriota;c__Methanobacteria;o__Methanobacteriales;f__Methanobacteriaceae;g__Methanobrevibacter_A;s__Methanobrevibacter_A smithii	ERS235538	ERP002469	Sweden	Europe
GUT_GENOME105688	KarlssonFH_2013__S487__bin.14	CIBIO	MAG	947537	106	12142	28.6	62.4	0	0.48	0	0	0	14	NA	GUT_GENOME132206	MGYG-HGUT-02164	d__Archaea;p__Methanobacteriota;c__Methanobacteria;o__Methanobacteriales;f__Methanobacteriaceae;g__Methanosphaera;s__Methanosphaera stadtmanae	ERS235547	ERP002469	Sweden	Europe
GUT_GENOME105707	KarlssonFH_2013__S487__bin.41	CIBIO	MAG	1736163	29	85083	31.18	100	0	0.06	0	0	0	20	NA	GUT_GENOME132205	MGYG-HGUT-02163	d__Archaea;p__Methanobacteriota;c__Methanobacteria;o__Methanobacteriales;f__Methanobacteriaceae;g__Methanobrevibacter_A;s__Methanobrevibacter_A smithii	ERS235547	ERP002469	Sweden	Europe
GUT_GENOME105747	KarlssonFH_2013__S488__bin.58	CIBIO	MAG	1786534	45	76561	31.08	100	0	0.07	0	0	0	20	NA	GUT_GENOME132205	MGYG-HGUT-02163	d__Archaea;p__Methanobacteriota;c__Methanobacteria;o__Methanobacteriales;f__Methanobacteriaceae;g__Methanobrevibacter_A;s__Methanobrevibacter_A smithii	ERS235548	ERP002469	Sweden	Europe
GUT_GENOME105803	KarlssonFH_2013__S497__bin.51	CIBIO	MAG	1782265	40	87431	30.99	100	0	0.07	0	0	0	20	NA	GUT_GENOME132205	MGYG-HGUT-02163	d__Archaea;p__Methanobacteriota;c__Methanobacteria;o__Methanobacteriales;f__Methanobacteriaceae;g__Methanobrevibacter_A;s__Methanobrevibacter_A smithii	ERS235550	ERP002469	Sweden	Europe
GUT_GENOME105868	KarlssonFH_2013__S524__bin.66	CIBIO	MAG	883602	13	70930	31.02	56.8	0	0.1	0	0	0	16	NA	GUT_GENOME143185	MGYG-HGUT-02446	d__Archaea;p__Methanobacteriota;c__Methanobacteria;o__Methanobacteriales;f__Methanobacteriaceae;g__Methanobrevibacter_A;s__Methanobrevibacter_A smithii_A	ERS235553	ERP002469	Sweden	Europe
GUT_GENOME105966	KarlssonFH_2013__S536__bin.61	CIBIO	MAG	1874861	85	54716	31.1	99.2	0	0.11	0	99.8	99.5	20	NA	GUT_GENOME132205	MGYG-HGUT-02163	d__Archaea;p__Methanobacteriota;c__Methanobacteria;o__Methanobacteriales;f__Methanobacteriaceae;g__Methanobrevibacter_A;s__Methanobrevibacter_A smithii	ERS235558	ERP002469	Sweden	Europe
GUT_GENOME105979	KarlssonFH_2013__S53__bin.22	CIBIO	MAG	1682571	190	12776	31.33	95.73	0.8	0.16	0	0	0	20	NA	GUT_GENOME132205	MGYG-HGUT-02163	d__Archaea;p__Methanobacteriota;c__Methanobacteria;o__Methanobacteriales;f__Methanobacteriaceae;g__Methanobrevibacter_A;s__Methanobrevibacter_A smithii	ERS235557	ERP002469	Sweden	Europe
GUT_GENOME106059	KarlssonFH_2013__S54__bin.28	CIBIO	MAG	1361077	8	342175	31.22	84.8	0	0.04	0	0	0	18	NA	GUT_GENOME132205	MGYG-HGUT-02163	d__Archaea;p__Methanobacteriota;c__Methanobacteria;o__Methanobacteriales;f__Methanobacteriaceae;g__Methanobrevibacter_A;s__Methanobrevibacter_A smithii	ERS235559	ERP002469	Sweden	Europe
GUT_GENOME106098	KarlssonFH_2013__S552__bin.17	CIBIO	MAG	1768106	278	9166	31.07	99.2	1.71	0.25	0	0	13.48	20	NA	GUT_GENOME132205	MGYG-HGUT-02163	d__Archaea;p__Methanobacteriota;c__Methanobacteria;o__Methanobacteriales;f__Methanobacteriaceae;g__Methanobrevibacter_A;s__Methanobrevibacter_A smithii	ERS235563	ERP002469	Sweden	Europe
GUT_GENOME106266	KarlssonFH_2013__S58__bin.16	CIBIO	MAG	1720038	102	25025	31.09	100	1.07	0.11	0	99.8	0	20	NA	GUT_GENOME132205	MGYG-HGUT-02163	d__Archaea;p__Methanobacteriota;c__Methanobacteria;o__Methanobacteriales;f__Methanobacteriaceae;g__Methanobrevibacter_A;s__Methanobrevibacter_A smithii	ERS235568	ERP002469	Iceland	Europe
GUT_GENOME106327	KarlssonFH_2013__S59__bin.18	CIBIO	MAG	1874998	59	65578	30.94	92.55	0	0.09	0	0	0	20	NA	GUT_GENOME132205	MGYG-HGUT-02163	d__Archaea;p__Methanobacteriota;c__Methanobacteria;o__Methanobacteriales;f__Methanobacteriaceae;g__Methanobrevibacter_A;s__Methanobrevibacter_A smithii	ERS235573	ERP002469	Sweden	Europe
GUT_GENOME106503	KarlssonFH_2013__S77__bin.39	CIBIO	MAG	1056173	95	19507	31.9	75.2	0	0.28	0	99.8	0	13	NA	GUT_GENOME132205	MGYG-HGUT-02163	d__Archaea;p__Methanobacteriota;c__Methanobacteria;o__Methanobacteriales;f__Methanobacteriaceae;g__Methanobrevibacter_A;s__Methanobrevibacter_A smithii	ERS235588	ERP002469	Sweden	Europe
GUT_GENOME106535	KarlssonFH_2013__S88__bin.21	CIBIO	MAG	1359222	26	106665	31.39	84.8	0	0.06	0	0	0	18	NA	GUT_GENOME132205	MGYG-HGUT-02163	d__Archaea;p__Methanobacteriota;c__Methanobacteria;o__Methanobacteriales;f__Methanobacteriaceae;g__Methanobrevibacter_A;s__Methanobrevibacter_A smithii	ERS235590	ERP002469	Sweden	Europe
GUT_GENOME107745	LeChatelierE_2013__MH0011__bin.22	CIBIO	MAG	1638220	274	7436	31.45	85.47	0.8	0.18	0	0	0	20	NA	GUT_GENOME132205	MGYG-HGUT-02163	d__Archaea;p__Methanobacteriota;c__Methanobacteria;o__Methanobacteriales;f__Methanobacteriaceae;g__Methanobrevibacter_A;s__Methanobrevibacter_A smithii	ERS328726	ERP003612	Denmark	Europe
GUT_GENOME107765	LeChatelierE_2013__MH0012__bin.24	CIBIO	MAG	1531215	29	84578	56.04	98.39	0	0.01	87.39	0	99.13	19	NA	GUT_GENOME143252	MGYG-HGUT-02456	d__Archaea;p__Thermoplasmatota;c__Thermoplasmata;o__Methanomassiliicoccales;f__Methanomethylophilaceae;g__Methanomethylophilus;s__Methanomethylophilus alvus	ERS328727	ERP003612	Denmark	Europe
GUT_GENOME107769	LeChatelierE_2013__MH0012__bin.30	CIBIO	MAG	1288493	385	3579	42.17	77.49	0.25	0.25	92.44	0	0	13	NA	GUT_GENOME132202	MGYG-HGUT-02160	d__Archaea;p__Thermoplasmatota;c__Thermoplasmata;o__Methanomassiliicoccales;f__Methanomassiliicoccaceae;g__Methanomassiliicoccus_A;s__Methanomassiliicoccus_A intestinalis	ERS328727	ERP003612	Denmark	Europe
GUT_GENOME109037	LeChatelierE_2013__MH0104__bin.10	CIBIO	MAG	1864232	171	19911	30.12	98.8	0.17	0.19	0	0	0	15	NA	GUT_GENOME143185	MGYG-HGUT-02446	d__Archaea;p__Methanobacteriota;c__Methanobacteria;o__Methanobacteriales;f__Methanobacteriaceae;g__Methanobrevibacter_A;s__Methanobrevibacter_A smithii_A	ERS328818	ERP003612	Denmark	Europe
GUT_GENOME109096	LeChatelierE_2013__MH0107__bin.35	CIBIO	MAG	1292691	291	5472	31.68	79.4	0	0.2	0	0	7.06	13	NA	GUT_GENOME132205	MGYG-HGUT-02163	d__Archaea;p__Methanobacteriota;c__Methanobacteria;o__Methanobacteriales;f__Methanobacteriaceae;g__Methanobrevibacter_A;s__Methanobrevibacter_A smithii	ERS328821	ERP003612	Denmark	Europe
GUT_GENOME109190	LeChatelierE_2013__MH0115__bin.18	CIBIO	MAG	1656060	157	18462	31.22	94.4	1.6	0.15	0	0	0	18	NA	GUT_GENOME132205	MGYG-HGUT-02163	d__Archaea;p__Methanobacteriota;c__Methanobacteria;o__Methanobacteriales;f__Methanobacteriaceae;g__Methanobrevibacter_A;s__Methanobrevibacter_A smithii	ERS328828	ERP003612	Denmark	Europe
GUT_GENOME109540	LeChatelierE_2013__MH0131__bin.32	CIBIO	MAG	1613904	102	25216	31.46	97.2	0	0.08	0	0	36.25	20	NA	GUT_GENOME132205	MGYG-HGUT-02163	d__Archaea;p__Methanobacteriota;c__Methanobacteria;o__Methanobacteriales;f__Methanobacteriaceae;g__Methanobrevibacter_A;s__Methanobrevibacter_A smithii	ERS328844	ERP003612	Denmark	Europe
GUT_GENOME109569	LeChatelierE_2013__MH0132__bin.40	CIBIO	MAG	1622539	32	100435	31.34	100	0	0.06	0	0	0	20	NA	GUT_GENOME132205	MGYG-HGUT-02163	d__Archaea;p__Methanobacteriota;c__Methanobacteria;o__Methanobacteriales;f__Methanobacteriaceae;g__Methanobrevibacter_A;s__Methanobrevibacter_A smithii	ERS328845	ERP003612	Denmark	Europe
GUT_GENOME110060	LeChatelierE_2013__MH0153__bin.36	CIBIO	MAG	1150116	234	5810	31.91	71.13	1.11	0.27	0	65.34	0	10	NA	GUT_GENOME132205	MGYG-HGUT-02163	d__Archaea;p__Methanobacteriota;c__Methanobacteria;o__Methanobacteriales;f__Methanobacteriaceae;g__Methanobrevibacter_A;s__Methanobrevibacter_A smithii	ERS328866	ERP003612	Denmark	Europe
GUT_GENOME110260	LeChatelierE_2013__MH0163__bin.9	CIBIO	MAG	1089363	391	2913	30.54	59.93	0.8	0.36	0	0	0	9	NA	GUT_GENOME143185	MGYG-HGUT-02446	d__Archaea;p__Methanobacteriota;c__Methanobacteria;o__Methanobacteriales;f__Methanobacteriaceae;g__Methanobrevibacter_A;s__Methanobrevibacter_A smithii_A	ERS328876	ERP003612	Denmark	Europe
GUT_GENOME111483	LeChatelierE_2013__MH0229__bin.55	CIBIO	MAG	1848798	78	41740	31.05	96.8	1.2	0.09	0	0	0	20	NA	GUT_GENOME132205	MGYG-HGUT-02163	d__Archaea;p__Methanobacteriota;c__Methanobacteria;o__Methanobacteriales;f__Methanobacteriaceae;g__Methanobrevibacter_A;s__Methanobrevibacter_A smithii	ERS328920	ERP003612	Denmark	Europe
GUT_GENOME112422	LeChatelierE_2013__MH0318__bin.77	CIBIO	MAG	1620374	33	136111	44.5	95.16	1.61	0.04	93.28	99.86	99.06	18	NA	GUT_GENOME112422	MGYG-HGUT-01856	d__Archaea;p__Thermoplasmatota;c__Thermoplasmata;o__Methanomassiliicoccales;f__Methanomassiliicoccaceae;g__Methanomassiliicoccus_A;s__	ERS328948	ERP003612	Denmark	Europe
GUT_GENOME112596	LeChatelierE_2013__MH0405__bin.23	CIBIO	MAG	1225153	323	4372	59.82	80.44	1.21	0.23	86.55	99.8	0	19	NA	GUT_GENOME247230	MGYG-HGUT-03888	d__Archaea;p__Thermoplasmatota;c__Thermoplasmata;o__Methanomassiliicoccales;f__Methanomethylophilaceae;g__UBA71;s__	ERS328954	ERP003612	Denmark	Europe
GUT_GENOME112773	LeChatelierE_2013__MH0409__bin.22	CIBIO	MAG	1475006	30	97568	56.39	95.7	0	0.03	87.39	99.8	99.13	20	NA	GUT_GENOME143252	MGYG-HGUT-02456	d__Archaea;p__Thermoplasmatota;c__Thermoplasmata;o__Methanomassiliicoccales;f__Methanomethylophilaceae;g__Methanomethylophilus;s__Methanomethylophilus alvus	ERS328958	ERP003612	Denmark	Europe
GUT_GENOME112994	LeChatelierE_2013__MH0415__bin.20	CIBIO	MAG	1271193	278	5563	60.01	80.61	1.61	0.38	86.55	99.8	99.16	17	NA	GUT_GENOME251929	MGYG-HGUT-03962	d__Archaea;p__Thermoplasmatota;c__Thermoplasmata;o__Methanomassiliicoccales;f__Methanomethylophilaceae;g__UBA71;s__	ERS328964	ERP003612	Denmark	Europe
GUT_GENOME113524	LeChatelierE_2013__MH0430__bin.27	CIBIO	MAG	1784079	30	78841	59.76	98.52	0	0.1	86.55	99.8	99.16	20	NA	GUT_GENOME251929	MGYG-HGUT-03962	d__Archaea;p__Thermoplasmatota;c__Thermoplasmata;o__Methanomassiliicoccales;f__Methanomethylophilaceae;g__UBA71;s__	ERS328979	ERP003612	Denmark	Europe
GUT_GENOME114017	LeChatelierE_2013__MH0442__bin.15	CIBIO	MAG	1456507	195	10432	56.54	94.04	0.81	0.23	87.39	0	35.12	19	NA	GUT_GENOME143252	MGYG-HGUT-02456	d__Archaea;p__Thermoplasmatota;c__Thermoplasmata;o__Methanomassiliicoccales;f__Methanomethylophilaceae;g__Methanomethylophilus;s__Methanomethylophilus alvus	ERS328991	ERP003612	Denmark	Europe
GUT_GENOME114325	LeChatelierE_2013__MH0448__bin.82	CIBIO	MAG	1601431	25	75513	56.05	98.39	0	0.02	87.39	99.8	99.13	20	NA	GUT_GENOME143252	MGYG-HGUT-02456	d__Archaea;p__Thermoplasmatota;c__Thermoplasmata;o__Methanomassiliicoccales;f__Methanomethylophilaceae;g__Methanomethylophilus;s__Methanomethylophilus alvus	ERS328997	ERP003612	Denmark	Europe
GUT_GENOME115157	LiJ_2014__MH0262__bin.41	CIBIO	MAG	1704482	90	35286	31.27	100	0	0.02	0	0	0	20	NA	GUT_GENOME132205	MGYG-HGUT-02163	d__Archaea;p__Methanobacteriota;c__Methanobacteria;o__Methanobacteriales;f__Methanobacteriaceae;g__Methanobrevibacter_A;s__Methanobrevibacter_A smithii	ERS396304	ERP004605	Denmark	Europe
GUT_GENOME115540	LiJ_2014__MH0293__bin.42	CIBIO	MAG	1789833	141	19148	30.48	100	0	0.02	0	0	0	20	NA	GUT_GENOME143185	MGYG-HGUT-02446	d__Archaea;p__Methanobacteriota;c__Methanobacteria;o__Methanobacteriales;f__Methanobacteriaceae;g__Methanobrevibacter_A;s__Methanobrevibacter_A smithii_A	ERS396316	ERP004605	Denmark	Europe
GUT_GENOME115742	LiJ_2014__MH0309__bin.27	CIBIO	MAG	1765928	122	30156	41.56	97.18	0.81	0.04	92.44	99.86	99.03	20	NA	GUT_GENOME132202	MGYG-HGUT-02160	d__Archaea;p__Thermoplasmatota;c__Thermoplasmata;o__Methanomassiliicoccales;f__Methanomassiliicoccaceae;g__Methanomassiliicoccus_A;s__Methanomassiliicoccus_A intestinalis	ERS396323	ERP004605	Denmark	Europe
GUT_GENOME115814	LiJ_2014__MH0314__bin.17	CIBIO	MAG	1086156	358	3297	31.97	63.36	2.55	0.16	0	0	32.91	13	NA	GUT_GENOME132205	MGYG-HGUT-02163	d__Archaea;p__Methanobacteriota;c__Methanobacteria;o__Methanobacteriales;f__Methanobacteriaceae;g__Methanobrevibacter_A;s__Methanobrevibacter_A smithii	ERS396326	ERP004605	Denmark	Europe
GUT_GENOME116071	LiJ_2014__MH0329__bin.29	CIBIO	MAG	938233	358	2778	32.64	60.08	0.64	0.5	0	0	0	8	NA	GUT_GENOME132205	MGYG-HGUT-02163	d__Archaea;p__Methanobacteriota;c__Methanobacteria;o__Methanobacteriales;f__Methanobacteriaceae;g__Methanobrevibacter_A;s__Methanobrevibacter_A smithii	ERS396334	ERP004605	Denmark	Europe
GUT_GENOME116140	LiJ_2014__MH0330__bin.8	CIBIO	MAG	1837898	98	28048	30.63	100	0	0.02	0	0	0	20	NA	GUT_GENOME143185	MGYG-HGUT-02446	d__Archaea;p__Methanobacteriota;c__Methanobacteria;o__Methanobacteriales;f__Methanobacteriaceae;g__Methanobrevibacter_A;s__Methanobrevibacter_A smithii_A	ERS396335	ERP004605	Denmark	Europe
GUT_GENOME116646	LiJ_2014__MH0354__bin.28	CIBIO	MAG	1118365	10	168292	31.69	80	0	0	0	99.8	0	17	NA	GUT_GENOME132205	MGYG-HGUT-02163	d__Archaea;p__Methanobacteriota;c__Methanobacteria;o__Methanobacteriales;f__Methanobacteriaceae;g__Methanobrevibacter_A;s__Methanobrevibacter_A smithii	ERS396354	ERP004605	Denmark	Europe
GUT_GENOME116755	LiJ_2014__MH0357__bin.33	CIBIO	MAG	1477775	363	4680	58.18	81.69	1.61	0.14	0	0	0	20	NA	GUT_GENOME268463	MGYG-HGUT-04339	d__Archaea;p__Thermoplasmatota;c__Thermoplasmata;o__Methanomassiliicoccales;f__Methanomethylophilaceae;g__UBA71;s__	ERS396357	ERP004605	Denmark	Europe
GUT_GENOME117039	LiJ_2014__MH0366__bin.50	CIBIO	MAG	2042146	634	3451	32.07	77.87	0.58	0.13	0	0	0	15	NA	GUT_GENOME132205	MGYG-HGUT-02163	d__Archaea;p__Methanobacteriota;c__Methanobacteria;o__Methanobacteriales;f__Methanobacteriaceae;g__Methanobrevibacter_A;s__Methanobrevibacter_A smithii	ERS396366	ERP004605	Denmark	Europe
GUT_GENOME117833	LiJ_2014__MH0391__bin.56	CIBIO	MAG	1740258	221	12993	31.3	98.34	0	0.05	0	99.8	99.5	16	NA	GUT_GENOME132205	MGYG-HGUT-02163	d__Archaea;p__Methanobacteriota;c__Methanobacteria;o__Methanobacteriales;f__Methanobacteriaceae;g__Methanobrevibacter_A;s__Methanobrevibacter_A smithii	ERS396390	ERP004605	Denmark	Europe
GUT_GENOME118101	LiJ_2014__MH0399__bin.34	CIBIO	MAG	1735001	39	88200	41.34	95.56	0.81	0.02	92.44	99.86	99.03	20	NA	GUT_GENOME132202	MGYG-HGUT-02160	d__Archaea;p__Thermoplasmatota;c__Thermoplasmata;o__Methanomassiliicoccales;f__Methanomassiliicoccaceae;g__Methanomassiliicoccus_A;s__Methanomassiliicoccus_A intestinalis	ERS396398	ERP004605	Denmark	Europe
GUT_GENOME118492	LiJ_2014__O2.UC13-1__bin.105	CIBIO	MAG	2528761	830	3353	32.5	85.07	2.4	0.08	0	0	0	14	NA	GUT_GENOME132205	MGYG-HGUT-02163	d__Archaea;p__Methanobacteriota;c__Methanobacteria;o__Methanobacteriales;f__Methanobacteriaceae;g__Methanobrevibacter_A;s__Methanobrevibacter_A smithii	ERS396410	ERP004605	Spain	Europe
GUT_GENOME118556	LiJ_2014__O2.UC14-1__bin.59	CIBIO	MAG	1414703	306	5914	32.06	89.15	0.86	0.03	0	0	99.5	18	NA	GUT_GENOME132205	MGYG-HGUT-02163	d__Archaea;p__Methanobacteriota;c__Methanobacteria;o__Methanobacteriales;f__Methanobacteriaceae;g__Methanobrevibacter_A;s__Methanobrevibacter_A smithii	ERS396411	ERP004605	Spain	Europe
GUT_GENOME118930	LiJ_2014__O2.UC28-0__bin.31	CIBIO	MAG	1271286	31	53509	31.44	82.4	0	0	0	99.8	0	19	NA	GUT_GENOME132205	MGYG-HGUT-02163	d__Archaea;p__Methanobacteriota;c__Methanobacteria;o__Methanobacteriales;f__Methanobacteriaceae;g__Methanobrevibacter_A;s__Methanobrevibacter_A smithii	ERS396427	ERP004605	Spain	Europe
GUT_GENOME118976	LiJ_2014__O2.UC28-2__bin.20	CIBIO	MAG	1770103	20	120767	31.09	100	0	0.01	0	0	0	20	NA	GUT_GENOME132205	MGYG-HGUT-02163	d__Archaea;p__Methanobacteriota;c__Methanobacteria;o__Methanobacteriales;f__Methanobacteriaceae;g__Methanobrevibacter_A;s__Methanobrevibacter_A smithii	ERS396429	ERP004605	Spain	Europe
GUT_GENOME119337	LiJ_2014__O2.UC40-1__bin.9	CIBIO	MAG	1629598	218	9517	31.56	91.33	0.8	0.01	0	99.8	99.5	20	NA	GUT_GENOME132205	MGYG-HGUT-02163	d__Archaea;p__Methanobacteriota;c__Methanobacteria;o__Methanobacteriales;f__Methanobacteriaceae;g__Methanobrevibacter_A;s__Methanobrevibacter_A smithii	ERS396440	ERP004605	Spain	Europe
GUT_GENOME119488	LiJ_2014__O2.UC47-1__bin.26	CIBIO	MAG	1804762	173	16264	31.09	97.2	0	0.01	0	0	0	20	NA	GUT_GENOME132205	MGYG-HGUT-02163	d__Archaea;p__Methanobacteriota;c__Methanobacteria;o__Methanobacteriales;f__Methanobacteriaceae;g__Methanobrevibacter_A;s__Methanobrevibacter_A smithii	ERS396446	ERP004605	Spain	Europe
GUT_GENOME119678	LiJ_2014__O2.UC7-0__bin.48	CIBIO	MAG	1377942	448	3370	32.08	73.54	1.6	0.11	0	0	0	10	NA	GUT_GENOME132205	MGYG-HGUT-02163	d__Archaea;p__Methanobacteriota;c__Methanobacteria;o__Methanobacteriales;f__Methanobacteriaceae;g__Methanobrevibacter_A;s__Methanobrevibacter_A smithii	ERS396452	ERP004605	Spain	Europe
GUT_GENOME120168	LiJ_2014__V1.CD40-0__bin.71	CIBIO	MAG	1761355	88	37267	31.14	99.73	0	0.02	0	99.8	0	20	NA	GUT_GENOME132205	MGYG-HGUT-02163	d__Archaea;p__Methanobacteriota;c__Methanobacteria;o__Methanobacteriales;f__Methanobacteriaceae;g__Methanobrevibacter_A;s__Methanobrevibacter_A smithii	ERS396471	ERP004605	Spain	Europe
GUT_GENOME120709	LiJ_2014__V1.CD6-0-PT__bin.91	CIBIO	MAG	1689785	20	202820	31.17	100	0	0.01	0	0	0	20	NA	GUT_GENOME132205	MGYG-HGUT-02163	d__Archaea;p__Methanobacteriota;c__Methanobacteria;o__Methanobacteriales;f__Methanobacteriaceae;g__Methanobrevibacter_A;s__Methanobrevibacter_A smithii	ERS396489	ERP004605	Spain	Europe
GUT_GENOME120881	LiJ_2014__V1.FI04__bin.33	CIBIO	MAG	1790740	9	523883	30.98	100	0	0.01	0	0	0	20	NA	GUT_GENOME132205	MGYG-HGUT-02163	d__Archaea;p__Methanobacteriota;c__Methanobacteria;o__Methanobacteriales;f__Methanobacteriaceae;g__Methanobrevibacter_A;s__Methanobrevibacter_A smithii	ERS396495	ERP004605	Spain	Europe
GUT_GENOME121029	LiJ_2014__V1.FI07__bin.80	CIBIO	MAG	1807165	191	14907	31.3	99.2	0	0.01	0	99.8	99.5	20	NA	GUT_GENOME132205	MGYG-HGUT-02163	d__Archaea;p__Methanobacteriota;c__Methanobacteria;o__Methanobacteriales;f__Methanobacteriaceae;g__Methanobrevibacter_A;s__Methanobrevibacter_A smithii	ERS396498	ERP004605	Spain	Europe
GUT_GENOME121279	LiJ_2014__V1.FI14__bin.70	CIBIO	MAG	1491603	150	16333	31.78	94.4	0.04	0.04	0	0	0	20	NA	GUT_GENOME132205	MGYG-HGUT-02163	d__Archaea;p__Methanobacteriota;c__Methanobacteria;o__Methanobacteriales;f__Methanobacteriaceae;g__Methanobrevibacter_A;s__Methanobrevibacter_A smithii	ERS396505	ERP004605	Spain	Europe
GUT_GENOME121298	LiJ_2014__V1.FI15__bin.14	CIBIO	MAG	1636629	259	8515	31.55	98	0.8	0.05	0	0	0	17	NA	GUT_GENOME132205	MGYG-HGUT-02163	d__Archaea;p__Methanobacteriota;c__Methanobacteria;o__Methanobacteriales;f__Methanobacteriaceae;g__Methanobrevibacter_A;s__Methanobrevibacter_A smithii	ERS396506	ERP004605	Spain	Europe
GUT_GENOME121386	LiJ_2014__V1.FI17__bin.27	CIBIO	MAG	1785337	14	296298	31.12	100	0	0.01	0	0	0	20	NA	GUT_GENOME132205	MGYG-HGUT-02163	d__Archaea;p__Methanobacteriota;c__Methanobacteria;o__Methanobacteriales;f__Methanobacteriaceae;g__Methanobrevibacter_A;s__Methanobrevibacter_A smithii	ERS396508	ERP004605	Spain	Europe
GUT_GENOME122161	LiJ_2014__V1.UC22-1__bin.83	CIBIO	MAG	1781156	29	110505	31.11	100	0.04	0.01	0	0	0	20	NA	GUT_GENOME132205	MGYG-HGUT-02163	d__Archaea;p__Methanobacteriota;c__Methanobacteria;o__Methanobacteriales;f__Methanobacteriaceae;g__Methanobrevibacter_A;s__Methanobrevibacter_A smithii	ERS396529	ERP004605	Spain	Europe
GUT_GENOME126110	LiSS_2016__FAT_012-22-2-0__bin.9	CIBIO	MAG	1667444	62	48091	31.16	100	0.8	0.01	0	0	0	20	NA	GUT_GENOME132205	MGYG-HGUT-02163	d__Archaea;p__Methanobacteriota;c__Methanobacteria;o__Methanobacteriales;f__Methanobacteriaceae;g__Methanobrevibacter_A;s__Methanobrevibacter_A smithii	ERS1069654	ERP013827	Netherlands	Europe
GUT_GENOME126632	LiSS_2016__FAT_023-22-14-0__bin.15	CIBIO	MAG	766260	284	2719	31.81	65.45	0.8	0.08	0	0	0	17	NA	GUT_GENOME132205	MGYG-HGUT-02163	d__Archaea;p__Methanobacteriota;c__Methanobacteria;o__Methanobacteriales;f__Methanobacteriaceae;g__Methanobrevibacter_A;s__Methanobrevibacter_A smithii	ERS1069678	ERP013827	Netherlands	Europe
GUT_GENOME126676	LiSS_2016__FAT_023-22-2-0__bin.19	CIBIO	MAG	1739456	254	11296	31.06	98.36	0	0.05	0	0	0	20	NA	GUT_GENOME132205	MGYG-HGUT-02163	d__Archaea;p__Methanobacteriota;c__Methanobacteria;o__Methanobacteriales;f__Methanobacteriaceae;g__Methanobrevibacter_A;s__Methanobrevibacter_A smithii	ERS1069679	ERP013827	Netherlands	Europe
GUT_GENOME126972	LiSS_2016__FAT_DON_8-22-0-0__bin.46	CIBIO	MAG	1237908	421	3065	31.13	73.47	1.2	0.05	0	0	0	8	NA	GUT_GENOME132205	MGYG-HGUT-02163	d__Archaea;p__Methanobacteriota;c__Methanobacteria;o__Methanobacteriales;f__Methanobacteriaceae;g__Methanobrevibacter_A;s__Methanobrevibacter_A smithii	ERS1069691	ERP013827	Netherlands	Europe
GUT_GENOME127144	LiuW_2016__SRR3992961__bin.67	CIBIO	MAG	1527886	64	41249	56.36	98.39	0.81	0.03	87.39	99.8	99.13	20	NA	GUT_GENOME143252	MGYG-HGUT-02456	d__Archaea;p__Thermoplasmatota;c__Thermoplasmata;o__Methanomassiliicoccales;f__Methanomethylophilaceae;g__Methanomethylophilus;s__Methanomethylophilus alvus	SRS1596774	SRP080787	Mongolia	Asia
GUT_GENOME129791	LomanNJ_2013__OBK2828__bin.6	CIBIO	MAG	1127670	402	2903	33.01	67.18	0.84	0.07	0	0	0	9	NA	GUT_GENOME132205	MGYG-HGUT-02163	d__Archaea;p__Methanobacteriota;c__Methanobacteria;o__Methanobacteriales;f__Methanobacteriaceae;g__Methanobrevibacter_A;s__Methanobrevibacter_A smithii	ERS234273	ERP001956	Germany	Europe
GUT_GENOME129821	LomanNJ_2013__OBK3132__bin.26	CIBIO	MAG	1576611	156	16922	31.46	96.27	3.17	0.02	0	0	0	19	NA	GUT_GENOME132205	MGYG-HGUT-02163	d__Archaea;p__Methanobacteriota;c__Methanobacteria;o__Methanobacteriales;f__Methanobacteriaceae;g__Methanobrevibacter_A;s__Methanobrevibacter_A smithii	ERS234283	ERP001956	Germany	Europe
GUT_GENOME129983	LoombaR_2017__SID0008_kcu__bin.13	CIBIO	MAG	1766722	20	123273	31.06	100	0	0.01	0	0	0	20	NA	GUT_GENOME132205	MGYG-HGUT-02163	d__Archaea;p__Methanobacteriota;c__Methanobacteria;o__Methanobacteriales;f__Methanobacteriaceae;g__Methanobrevibacter_A;s__Methanobrevibacter_A smithii	SRS1994027	SRP100446	United States	North America
GUT_GENOME130062	LoombaR_2017__SID0012_qdz__bin.7	CIBIO	MAG	1781449	24	165530	31.02	100	0	0.01	0	0	0	20	NA	GUT_GENOME132205	MGYG-HGUT-02163	d__Archaea;p__Methanobacteriota;c__Methanobacteria;o__Methanobacteriales;f__Methanobacteriaceae;g__Methanobrevibacter_A;s__Methanobrevibacter_A smithii	SRS1994025	SRP100446	United States	North America
GUT_GENOME130066	LoombaR_2017__SID0013_eop__bin.14	CIBIO	MAG	1583745	267	7704	31.59	97.2	0.04	0.01	0	0	0	20	NA	GUT_GENOME132205	MGYG-HGUT-02163	d__Archaea;p__Methanobacteriota;c__Methanobacteria;o__Methanobacteriales;f__Methanobacteriaceae;g__Methanobrevibacter_A;s__Methanobrevibacter_A smithii	SRS1994024	SRP100446	United States	North America
GUT_GENOME130239	LoombaR_2017__SID1022_aav__bin.32	CIBIO	MAG	1646872	331	6086	31.64	96.09	0	0.02	0	0	0	15	NA	GUT_GENOME132205	MGYG-HGUT-02163	d__Archaea;p__Methanobacteriota;c__Methanobacteria;o__Methanobacteriales;f__Methanobacteriaceae;g__Methanobrevibacter_A;s__Methanobrevibacter_A smithii	SRS1993590	SRP100446	United States	North America
GUT_GENOME130794	LoombaR_2017__SID5501_aaq__bin.3	CIBIO	MAG	1595501	6	260504	31.37	99.2	0	0.01	0	0	0	20	NA	GUT_GENOME132205	MGYG-HGUT-02163	d__Archaea;p__Methanobacteriota;c__Methanobacteria;o__Methanobacteriales;f__Methanobacteriaceae;g__Methanobrevibacter_A;s__Methanobrevibacter_A smithii	SRS1993547	SRP100446	United States	North America
GUT_GENOME130816	LoombaR_2017__SID5564_meq__bin.22	CIBIO	MAG	1799569	64	46447	31.2	100	0	0.01	0	0	0	20	NA	GUT_GENOME132205	MGYG-HGUT-02163	d__Archaea;p__Methanobacteriota;c__Methanobacteria;o__Methanobacteriales;f__Methanobacteriaceae;g__Methanobrevibacter_A;s__Methanobrevibacter_A smithii	SRS1993545	SRP100446	United States	North America
GUT_GENOME132201	M_alvus_Mx05	NCBI	Isolate	1666764	1	1666764	55.6	98.39	0.81	NA	87.39	99.8	99.13	20	GCF_003711245	GUT_GENOME143252	MGYG-HGUT-02456	d__Archaea;p__Thermoplasmatota;c__Thermoplasmata;o__Methanomassiliicoccales;f__Methanomethylophilaceae;g__Methanomethylophilus;s__Methanomethylophilus alvus	SAMN05892231	PRJNA224116	NA	NA
GUT_GENOME132202	M_intestinalis_Mx1-Issoire	NCBI	Isolate	1931651	1	1931651	41.26	98.79	0.81	NA	92.44	99.86	99.03	20	GCF_000404225	GUT_GENOME132202	MGYG-HGUT-02160	d__Archaea;p__Thermoplasmatota;c__Thermoplasmata;o__Methanomassiliicoccales;f__Methanomassiliicoccaceae;g__Methanomassiliicoccus_A;s__Methanomassiliicoccus_A intestinalis	SAMN03081468	PRJNA224116	NA	Europe
GUT_GENOME132203	M_luminyensis_B10	NCBI	Isolate	2620233	26	167531	60.48	98.39	0	NA	93.28	99.86	99.03	20	GCF_000308215	GUT_GENOME132203	MGYG-HGUT-02161	d__Archaea;p__Thermoplasmatota;c__Thermoplasmata;o__Methanomassiliicoccales;f__Methanomassiliicoccaceae;g__Methanomassiliicoccus;s__Methanomassiliicoccus luminyensis	SAMEA3138426	PRJNA224116	NA	NA
GUT_GENOME132204	M_oralis_JMR01	NCBI	Isolate	2083509	60	88069	27.77	96.8	0	NA	0	99.8	99.4	20	GCF_000529525	GUT_GENOME132204	MGYG-HGUT-02162	d__Archaea;p__Methanobacteriota;c__Methanobacteria;o__Methanobacteriales;f__Methanobacteriaceae;g__Methanobrevibacter_A;s__Methanobrevibacter_A oralis	SAMEA3138857	PRJNA224116	NA	NA
GUT_GENOME132205	M_smithii_2374	NCBI	Isolate	1727775	25	1043555	31.28	100	0	NA	0	99.8	99.5	20	GCF_000151225	GUT_GENOME132205	MGYG-HGUT-02163	d__Archaea;p__Methanobacteriota;c__Methanobacteria;o__Methanobacteriales;f__Methanobacteriaceae;g__Methanobrevibacter_A;s__Methanobrevibacter_A smithii	SAMN00008834	PRJNA224116	NA	North America
GUT_GENOME132206	M_stadtmanae_DSM3091	NCBI	Isolate	1767403	1	1767403	27.63	97.6	0	NA	0	99.8	99.43	20	GCF_000012545	GUT_GENOME132206	MGYG-HGUT-02164	d__Archaea;p__Methanobacteriota;c__Methanobacteria;o__Methanobacteriales;f__Methanobacteriaceae;g__Methanosphaera;s__Methanosphaera stadtmanae	SAMN02604180	PRJNA224116	NA	NA
GUT_GENOME132332	NielsenHB_2014__MH0012__bin.36	CIBIO	MAG	1528077	59	61338	56.27	94.35	0	0.01	87.39	0	99.13	20	NA	GUT_GENOME143252	MGYG-HGUT-02456	d__Archaea;p__Thermoplasmatota;c__Thermoplasmata;o__Methanomassiliicoccales;f__Methanomethylophilaceae;g__Methanomethylophilus;s__Methanomethylophilus alvus	ERS199011	ERP002061	Denmark	Europe
GUT_GENOME133176	NielsenHB_2014__MH0104__bin.27	CIBIO	MAG	1946173	255	11182	30.02	96.53	0.8	0.08	0	0	0	13	NA	GUT_GENOME143185	MGYG-HGUT-02446	d__Archaea;p__Methanobacteriota;c__Methanobacteria;o__Methanobacteriales;f__Methanobacteriaceae;g__Methanobrevibacter_A;s__Methanobrevibacter_A smithii_A	ERS199102	ERP002061	Denmark	Europe
GUT_GENOME133217	NielsenHB_2014__MH0107__bin.12	CIBIO	MAG	1108969	300	4332	31.81	70.27	0	0.1	0	0	0	7	NA	GUT_GENOME132205	MGYG-HGUT-02163	d__Archaea;p__Methanobacteriota;c__Methanobacteria;o__Methanobacteriales;f__Methanobacteriaceae;g__Methanobrevibacter_A;s__Methanobrevibacter_A smithii	ERS199105	ERP002061	Denmark	Europe
GUT_GENOME133303	NielsenHB_2014__MH0115__bin.18	CIBIO	MAG	1559345	214	10850	31.4	94	0.96	0.05	0	0	0	16	NA	GUT_GENOME132205	MGYG-HGUT-02163	d__Archaea;p__Methanobacteriota;c__Methanobacteria;o__Methanobacteriales;f__Methanobacteriaceae;g__Methanobrevibacter_A;s__Methanobrevibacter_A smithii	ERS199111	ERP002061	Denmark	Europe
GUT_GENOME133608	NielsenHB_2014__MH0132__bin.45	CIBIO	MAG	1668765	43	67150	31.37	100	0.04	0.03	0	0	0	20	NA	GUT_GENOME132205	MGYG-HGUT-02163	d__Archaea;p__Methanobacteriota;c__Methanobacteria;o__Methanobacteriales;f__Methanobacteriaceae;g__Methanobrevibacter_A;s__Methanobrevibacter_A smithii	ERS199126	ERP002061	Denmark	Europe
GUT_GENOME134609	NielsenHB_2014__O2_UC12_2__bin.31	CIBIO	MAG	1046354	362	3033	31.34	60.6	0.13	0.24	0	0	0	9	NA	GUT_GENOME132205	MGYG-HGUT-02163	d__Archaea;p__Methanobacteriota;c__Methanobacteria;o__Methanobacteriales;f__Methanobacteriaceae;g__Methanobrevibacter_A;s__Methanobrevibacter_A smithii	ERS199182	ERP002061	Spain	Europe
GUT_GENOME134626	NielsenHB_2014__O2_UC1_2__bin.15	CIBIO	MAG	1721149	33	102693	31.16	100	0	0.02	0	0	0	20	NA	GUT_GENOME132205	MGYG-HGUT-02163	d__Archaea;p__Methanobacteriota;c__Methanobacteria;o__Methanobacteriales;f__Methanobacteriaceae;g__Methanobrevibacter_A;s__Methanobrevibacter_A smithii	ERS199178	ERP002061	Spain	Europe
GUT_GENOME134692	NielsenHB_2014__O2_UC13_2__bin.8	CIBIO	MAG	1299141	114	15645	31.83	87.2	0	0.07	0	99.8	99.5	15	NA	GUT_GENOME132205	MGYG-HGUT-02163	d__Archaea;p__Methanobacteriota;c__Methanobacteria;o__Methanobacteriales;f__Methanobacteriaceae;g__Methanobrevibacter_A;s__Methanobrevibacter_A smithii	ERS199186	ERP002061	Spain	Europe
GUT_GENOME134705	NielsenHB_2014__O2_UC14_2__bin.21	CIBIO	MAG	1831598	36	201459	31.1	100	0.8	0.05	0	99.8	0	20	NA	GUT_GENOME132205	MGYG-HGUT-02163	d__Archaea;p__Methanobacteriota;c__Methanobacteria;o__Methanobacteriales;f__Methanobacteriaceae;g__Methanobrevibacter_A;s__Methanobrevibacter_A smithii	ERS199184	ERP002061	Spain	Europe
GUT_GENOME134962	NielsenHB_2014__O2_UC24_2__bin.11	CIBIO	MAG	1758699	64	44235	31.17	99.2	0	0.04	0	99.8	0	20	NA	GUT_GENOME132205	MGYG-HGUT-02163	d__Archaea;p__Methanobacteriota;c__Methanobacteria;o__Methanobacteriales;f__Methanobacteriaceae;g__Methanobrevibacter_A;s__Methanobrevibacter_A smithii	ERS199206	ERP002061	Spain	Europe
GUT_GENOME135072	NielsenHB_2014__O2_UC29_0__bin.24	CIBIO	MAG	1755401	69	48196	31.2	100	0	0.05	0	99.8	99.5	20	NA	GUT_GENOME132205	MGYG-HGUT-02163	d__Archaea;p__Methanobacteriota;c__Methanobacteria;o__Methanobacteriales;f__Methanobacteriaceae;g__Methanobrevibacter_A;s__Methanobrevibacter_A smithii	ERS199211	ERP002061	Spain	Europe
GUT_GENOME135106	NielsenHB_2014__O2_UC29_2__bin.45	CIBIO	MAG	1435270	11	489455	31.27	93.6	0	0.04	0	0	0	19	NA	GUT_GENOME132205	MGYG-HGUT-02163	d__Archaea;p__Methanobacteriota;c__Methanobacteria;o__Methanobacteriales;f__Methanobacteriaceae;g__Methanobrevibacter_A;s__Methanobrevibacter_A smithii	ERS199212	ERP002061	Spain	Europe
GUT_GENOME135222	NielsenHB_2014__O2_UC31_2__bin.9	CIBIO	MAG	1702194	69	33121	31.13	98.13	0	0.03	0	99.8	99.5	18	NA	GUT_GENOME132205	MGYG-HGUT-02163	d__Archaea;p__Methanobacteriota;c__Methanobacteria;o__Methanobacteriales;f__Methanobacteriaceae;g__Methanobrevibacter_A;s__Methanobrevibacter_A smithii	ERS199218	ERP002061	Spain	Europe
GUT_GENOME135456	NielsenHB_2014__O2_UC40_0__bin.5	CIBIO	MAG	1335178	300	5063	31.72	87.89	1.97	0.1	0	0	0	19	NA	GUT_GENOME132205	MGYG-HGUT-02163	d__Archaea;p__Methanobacteriota;c__Methanobacteria;o__Methanobacteriales;f__Methanobacteriaceae;g__Methanobrevibacter_A;s__Methanobrevibacter_A smithii	ERS199232	ERP002061	Spain	Europe
GUT_GENOME135474	NielsenHB_2014__O2_UC40_2__bin.48	CIBIO	MAG	1601313	80	28535	31.43	99.2	0	0.04	0	99.8	63.11	19	NA	GUT_GENOME132205	MGYG-HGUT-02163	d__Archaea;p__Methanobacteriota;c__Methanobacteria;o__Methanobacteriales;f__Methanobacteriaceae;g__Methanobrevibacter_A;s__Methanobrevibacter_A smithii	ERS199233	ERP002061	Spain	Europe
GUT_GENOME135513	NielsenHB_2014__O2_UC41_2__bin.14	CIBIO	MAG	2002364	136	30098	30.8	100	0.96	0.05	0	99.8	99.5	20	NA	GUT_GENOME132205	MGYG-HGUT-02163	d__Archaea;p__Methanobacteriota;c__Methanobacteria;o__Methanobacteriales;f__Methanobacteriaceae;g__Methanobrevibacter_A;s__Methanobrevibacter_A smithii	ERS199235	ERP002061	Spain	Europe
GUT_GENOME135685	NielsenHB_2014__O2_UC47_0__bin.24	CIBIO	MAG	1809045	24	117394	30.9	100	0	0.03	0	99.8	0	20	NA	GUT_GENOME132205	MGYG-HGUT-02163	d__Archaea;p__Methanobacteriota;c__Methanobacteria;o__Methanobacteriales;f__Methanobacteriaceae;g__Methanobrevibacter_A;s__Methanobrevibacter_A smithii	ERS199242	ERP002061	Spain	Europe
GUT_GENOME135723	NielsenHB_2014__O2_UC47_2__bin.38	CIBIO	MAG	1804683	17	192257	30.92	100	0	0.04	0	0	0	20	NA	GUT_GENOME132205	MGYG-HGUT-02163	d__Archaea;p__Methanobacteriota;c__Methanobacteria;o__Methanobacteriales;f__Methanobacteriaceae;g__Methanobrevibacter_A;s__Methanobrevibacter_A smithii	ERS199243	ERP002061	Spain	Europe
GUT_GENOME135810	NielsenHB_2014__O2_UC49_2__bin.49	CIBIO	MAG	1605047	51	54734	31.23	98.4	0.04	0.04	0	0	0	20	NA	GUT_GENOME132205	MGYG-HGUT-02163	d__Archaea;p__Methanobacteriota;c__Methanobacteria;o__Methanobacteriales;f__Methanobacteriaceae;g__Methanobrevibacter_A;s__Methanobrevibacter_A smithii	ERS199247	ERP002061	Spain	Europe
GUT_GENOME135818	NielsenHB_2014__O2_UC50_0__bin.21	CIBIO	MAG	1690791	34	100887	31.17	100	0	0.04	0	99.8	99.5	20	NA	GUT_GENOME132205	MGYG-HGUT-02163	d__Archaea;p__Methanobacteriota;c__Methanobacteria;o__Methanobacteriales;f__Methanobacteriaceae;g__Methanobrevibacter_A;s__Methanobrevibacter_A smithii	ERS199250	ERP002061	Spain	Europe
GUT_GENOME135886	NielsenHB_2014__O2_UC51_0__bin.22	CIBIO	MAG	1545113	352	5303	31.07	86.86	1.6	0.09	0	0	33.48	18	NA	GUT_GENOME132205	MGYG-HGUT-02163	d__Archaea;p__Methanobacteriota;c__Methanobacteria;o__Methanobacteriales;f__Methanobacteriaceae;g__Methanobrevibacter_A;s__Methanobrevibacter_A smithii	ERS199252	ERP002061	Spain	Europe
GUT_GENOME135943	NielsenHB_2014__O2_UC51_2__bin.77	CIBIO	MAG	1525478	44	54318	31.43	95.73	0.04	0.04	0	99.8	99.5	19	NA	GUT_GENOME132205	MGYG-HGUT-02163	d__Archaea;p__Methanobacteriota;c__Methanobacteria;o__Methanobacteriales;f__Methanobacteriaceae;g__Methanobrevibacter_A;s__Methanobrevibacter_A smithii	ERS199253	ERP002061	Spain	Europe
GUT_GENOME135949	NielsenHB_2014__O2_UC52_0__bin.14	CIBIO	MAG	1710976	13	252010	31.1	100	0	0.03	0	0	0	20	NA	GUT_GENOME132205	MGYG-HGUT-02163	d__Archaea;p__Methanobacteriota;c__Methanobacteria;o__Methanobacteriales;f__Methanobacteriaceae;g__Methanobrevibacter_A;s__Methanobrevibacter_A smithii	ERS199254	ERP002061	Spain	Europe
GUT_GENOME136237	NielsenHB_2014__O2_UC58_0__bin.17	CIBIO	MAG	1351855	284	5916	32.11	87.97	2.52	0.08	0	0	0	18	NA	GUT_GENOME132205	MGYG-HGUT-02163	d__Archaea;p__Methanobacteriota;c__Methanobacteria;o__Methanobacteriales;f__Methanobacteriaceae;g__Methanobrevibacter_A;s__Methanobrevibacter_A smithii	ERS199266	ERP002061	Spain	Europe
GUT_GENOME136673	NielsenHB_2014__V1_CD22_0__bin.34	CIBIO	MAG	1693841	13	221582	31.1	98.4	0	0.04	0	0	0	20	NA	GUT_GENOME132205	MGYG-HGUT-02163	d__Archaea;p__Methanobacteriota;c__Methanobacteria;o__Methanobacteriales;f__Methanobacteriaceae;g__Methanobrevibacter_A;s__Methanobrevibacter_A smithii	ERS199292	ERP002061	Spain	Europe
GUT_GENOME137151	NielsenHB_2014__V1_CD8_0__bin.4	CIBIO	MAG	1660104	155	15818	31.64	96	2.8	0.05	0	14.01	21.4	19	NA	GUT_GENOME132205	MGYG-HGUT-02163	d__Archaea;p__Methanobacteriota;c__Methanobacteria;o__Methanobacteriales;f__Methanobacteriaceae;g__Methanobrevibacter_A;s__Methanobrevibacter_A smithii	ERS199314	ERP002061	Spain	Europe
GUT_GENOME137154	NielsenHB_2014__V1_CD9_0__bin.10	CIBIO	MAG	1734942	242	10107	31.5	98	1.24	0.04	0	0	0	17	NA	GUT_GENOME132205	MGYG-HGUT-02163	d__Archaea;p__Methanobacteriota;c__Methanobacteria;o__Methanobacteriales;f__Methanobacteriaceae;g__Methanobrevibacter_A;s__Methanobrevibacter_A smithii	ERS199315	ERP002061	Spain	Europe
GUT_GENOME137195	NielsenHB_2014__V1_UC10_2__bin.54	CIBIO	MAG	1912208	48	84309	31.11	100	0.04	0.04	0	0	0	20	NA	GUT_GENOME132205	MGYG-HGUT-02163	d__Archaea;p__Methanobacteriota;c__Methanobacteria;o__Methanobacteriales;f__Methanobacteriaceae;g__Methanobrevibacter_A;s__Methanobrevibacter_A smithii	ERS199318	ERP002061	Spain	Europe
GUT_GENOME137448	NielsenHB_2014__V1_UC16_0__bin.2	CIBIO	MAG	1507167	11	375086	31.1	88	0	0.03	0	0	0	20	NA	GUT_GENOME132205	MGYG-HGUT-02163	d__Archaea;p__Methanobacteriota;c__Methanobacteria;o__Methanobacteriales;f__Methanobacteriaceae;g__Methanobrevibacter_A;s__Methanobrevibacter_A smithii	ERS199329	ERP002061	Spain	Europe
GUT_GENOME137479	NielsenHB_2014__V1_UC17_2__bin.6	CIBIO	MAG	1797145	31	94771	31.06	100	0	0.07	0	0	0	20	NA	GUT_GENOME132205	MGYG-HGUT-02163	d__Archaea;p__Methanobacteriota;c__Methanobacteria;o__Methanobacteriales;f__Methanobacteriaceae;g__Methanobrevibacter_A;s__Methanobrevibacter_A smithii	ERS199331	ERP002061	Spain	Europe
GUT_GENOME137665	NielsenHB_2014__V1_UC26_4__bin.11	CIBIO	MAG	1748746	15	438873	31.1	100	0	0.04	0	0	0	20	NA	GUT_GENOME132205	MGYG-HGUT-02163	d__Archaea;p__Methanobacteriota;c__Methanobacteria;o__Methanobacteriales;f__Methanobacteriaceae;g__Methanobrevibacter_A;s__Methanobrevibacter_A smithii	ERS199344	ERP002061	Spain	Europe
GUT_GENOME137770	NielsenHB_2014__V1_UC30_0__bin.26	CIBIO	MAG	1735310	11	315246	31.19	100	0	0.03	0	0	0	20	NA	GUT_GENOME132205	MGYG-HGUT-02163	d__Archaea;p__Methanobacteriota;c__Methanobacteria;o__Methanobacteriales;f__Methanobacteriaceae;g__Methanobrevibacter_A;s__Methanobrevibacter_A smithii	ERS199350	ERP002061	Spain	Europe
GUT_GENOME138033	NielsenHB_2014__V1_UC36_0__bin.61	CIBIO	MAG	1431832	5	433743	31.19	86.4	0	0.04	0	0	0	19	NA	GUT_GENOME132205	MGYG-HGUT-02163	d__Archaea;p__Methanobacteriota;c__Methanobacteria;o__Methanobacteriales;f__Methanobacteriaceae;g__Methanobrevibacter_A;s__Methanobrevibacter_A smithii	ERS199358	ERP002061	Spain	Europe
GUT_GENOME138203	NielsenHB_2014__V1_UC43_0__bin.74	CIBIO	MAG	1800202	25	88800	30.93	100	0	0.04	0	0	0	20	NA	GUT_GENOME132205	MGYG-HGUT-02163	d__Archaea;p__Methanobacteriota;c__Methanobacteria;o__Methanobacteriales;f__Methanobacteriaceae;g__Methanobrevibacter_A;s__Methanobrevibacter_A smithii	ERS199367	ERP002061	Spain	Europe
GUT_GENOME138236	NielsenHB_2014__V1_UC45_0__bin.24	CIBIO	MAG	1545187	57	43442	31.37	92.8	0	0.06	0	99.8	99.5	18	NA	GUT_GENOME132205	MGYG-HGUT-02163	d__Archaea;p__Methanobacteriota;c__Methanobacteria;o__Methanobacteriales;f__Methanobacteriaceae;g__Methanobrevibacter_A;s__Methanobrevibacter_A smithii	ERS199369	ERP002061	Spain	Europe
GUT_GENOME138598	NielsenHB_2014__V1_UC52_1__bin.28	CIBIO	MAG	1818847	14	348688	31.12	100	0	0.05	0	0	0	20	NA	GUT_GENOME132205	MGYG-HGUT-02163	d__Archaea;p__Methanobacteriota;c__Methanobacteria;o__Methanobacteriales;f__Methanobacteriaceae;g__Methanobrevibacter_A;s__Methanobrevibacter_A smithii	ERS199381	ERP002061	Spain	Europe
GUT_GENOME139007	NielsenHB_2014__V1_UC8_0__bin.8	CIBIO	MAG	1744424	79	41950	31.24	96.8	0	0.05	0	99.8	0	20	NA	GUT_GENOME132205	MGYG-HGUT-02163	d__Archaea;p__Methanobacteriota;c__Methanobacteria;o__Methanobacteriales;f__Methanobacteriaceae;g__Methanobrevibacter_A;s__Methanobrevibacter_A smithii	ERS199394	ERP002061	Spain	Europe
GUT_GENOME139173	Obregon-TitoAJ_2015__NO02__bin.50	CIBIO	MAG	941016	6	337751	31.4	59.2	0	0.04	0	0	0	16	NA	GUT_GENOME132205	MGYG-HGUT-02163	d__Archaea;p__Methanobacteriota;c__Methanobacteria;o__Methanobacteriales;f__Methanobacteriaceae;g__Methanobrevibacter_A;s__Methanobrevibacter_A smithii	SRS820585	SRP052307	United States	North America
GUT_GENOME139189	Obregon-TitoAJ_2015__NO03__bin.20	CIBIO	MAG	1628350	347	6001	31.12	88	2.4	0.32	0	0	0	19	NA	GUT_GENOME132205	MGYG-HGUT-02163	d__Archaea;p__Methanobacteriota;c__Methanobacteria;o__Methanobacteriales;f__Methanobacteriaceae;g__Methanobrevibacter_A;s__Methanobrevibacter_A smithii	SRS820586	SRP052307	United States	North America
GUT_GENOME139369	Obregon-TitoAJ_2015__NO13__bin.12	CIBIO	MAG	1511484	70	31118	30.86	96	0	0.1	0	0	0	20	NA	GUT_GENOME143185	MGYG-HGUT-02446	d__Archaea;p__Methanobacteriota;c__Methanobacteria;o__Methanobacteriales;f__Methanobacteriaceae;g__Methanobrevibacter_A;s__Methanobrevibacter_A smithii_A	SRS820595	SRP052307	United States	North America
GUT_GENOME139655	Obregon-TitoAJ_2015__SM03__bin.11	CIBIO	MAG	1854028	387	6042	30.09	93.6	2.4	0.15	0	0	0	20	NA	GUT_GENOME143185	MGYG-HGUT-02446	d__Archaea;p__Methanobacteriota;c__Methanobacteria;o__Methanobacteriales;f__Methanobacteriaceae;g__Methanobrevibacter_A;s__Methanobrevibacter_A smithii_A	SRS820608	SRP052307	Peru	South America
GUT_GENOME139679	Obregon-TitoAJ_2015__SM11__bin.15	CIBIO	MAG	1828364	48	63419	30.3	97.6	0	0.08	0	0	0	20	NA	GUT_GENOME143185	MGYG-HGUT-02446	d__Archaea;p__Methanobacteriota;c__Methanobacteria;o__Methanobacteriales;f__Methanobacteriaceae;g__Methanobrevibacter_A;s__Methanobrevibacter_A smithii_A	SRS820610	SRP052307	Peru	South America
GUT_GENOME139726	Obregon-TitoAJ_2015__SM18__bin.52	CIBIO	MAG	1818720	197	13212	30.41	99.2	2.11	0.09	0	0	0	20	NA	GUT_GENOME143185	MGYG-HGUT-02446	d__Archaea;p__Methanobacteriota;c__Methanobacteria;o__Methanobacteriales;f__Methanobacteriaceae;g__Methanobrevibacter_A;s__Methanobrevibacter_A smithii_A	SRS820614	SRP052307	Peru	South America
GUT_GENOME139871	Obregon-TitoAJ_2015__SM32__bin.3	CIBIO	MAG	795945	10	101509	30.96	52	0	0.08	0	0	0	15	NA	GUT_GENOME143185	MGYG-HGUT-02446	d__Archaea;p__Methanobacteriota;c__Methanobacteria;o__Methanobacteriales;f__Methanobacteriaceae;g__Methanobrevibacter_A;s__Methanobrevibacter_A smithii_A	SRS820620	SRP052307	Peru	South America
GUT_GENOME139935	Obregon-TitoAJ_2015__SM39__bin.33	CIBIO	MAG	1451289	58	44573	30.93	95.2	0	0.07	0	99.8	0	19	NA	GUT_GENOME143185	MGYG-HGUT-02446	d__Archaea;p__Methanobacteriota;c__Methanobacteria;o__Methanobacteriales;f__Methanobacteriaceae;g__Methanobrevibacter_A;s__Methanobrevibacter_A smithii_A	SRS820624	SRP052307	Peru	South America
GUT_GENOME139944	Obregon-TitoAJ_2015__SM40__bin.15	CIBIO	MAG	1339635	39	53837	30.81	89.6	0.8	0.11	0	0	0	19	NA	GUT_GENOME143185	MGYG-HGUT-02446	d__Archaea;p__Methanobacteriota;c__Methanobacteria;o__Methanobacteriales;f__Methanobacteriaceae;g__Methanobrevibacter_A;s__Methanobrevibacter_A smithii_A	SRS820625	SRP052307	Peru	South America
GUT_GENOME140888	PATRIC_1175296_12	PATRIC/IMG	Isolate	2620233	26	167531	60.48	98.39	0	NA	93.28	99.86	99.03	20	1.1753e+06	GUT_GENOME132203	MGYG-HGUT-02161	d__Archaea;p__Thermoplasmatota;c__Thermoplasmata;o__Methanomassiliicoccales;f__Methanomassiliicoccaceae;g__Methanomassiliicoccus;s__Methanomassiliicoccus luminyensis	SAMEA3138426	PRJNA159487	NA	NA
GUT_GENOME141221	PATRIC_1295009_4	PATRIC/IMG	Isolate	1931651	1	1931651	41.26	98.79	0.81	NA	92.44	99.86	99.03	20	1.29501e+06	GUT_GENOME132202	MGYG-HGUT-02160	d__Archaea;p__Thermoplasmatota;c__Thermoplasmata;o__Methanomassiliicoccales;f__Methanomassiliicoccaceae;g__Methanomassiliicoccus_A;s__Methanomassiliicoccus_A intestinalis	SAMN03081468	PRJNA189659	France	Europe
GUT_GENOME143185	PATRIC_2173_70	PATRIC/IMG	Isolate	1926146	16	240329	30.3	100	0	NA	0	99.8	99.5	20	2173.7	GUT_GENOME143185	MGYG-HGUT-02446	d__Archaea;p__Methanobacteriota;c__Methanobacteria;o__Methanobacteriales;f__Methanobacteriaceae;g__Methanobrevibacter_A;s__Methanobrevibacter_A smithii_A	SAMN07492084	PRJNA397915	United States	North America
GUT_GENOME143193	PATRIC_2317_11	PATRIC/IMG	Isolate	1700631	143	30025	27.62	97.6	0	NA	0	99.8	93.24	20	2317.11	GUT_GENOME132206	MGYG-HGUT-02164	d__Archaea;p__Methanobacteriota;c__Methanobacteria;o__Methanobacteriales;f__Methanobacteriaceae;g__Methanosphaera;s__Methanosphaera stadtmanae	SAMN06928224	PRJNA386222	Australia	Oceania
GUT_GENOME143252	IMG_2540341115	PATRIC/IMG	Isolate	1666792	1	1666792	55.59	98.39	0.81	NA	87.39	99.8	99.13	20	2540341115	GUT_GENOME143252	MGYG-HGUT-02456	d__Archaea;p__Thermoplasmatota;c__Thermoplasmata;o__Methanomassiliicoccales;f__Methanomethylophilaceae;g__Methanomethylophilus;s__Methanomethylophilus alvus	SAMN03081445	PRJNA175948	United States	North America
GUT_GENOME143257	IMG_2547132052	PATRIC/IMG	Isolate	1782572	44	103481	31.12	100	0	NA	0	99.8	99.5	20	2547132052	GUT_GENOME132205	MGYG-HGUT-02163	d__Archaea;p__Methanobacteriota;c__Methanobacteria;o__Methanobacteriales;f__Methanobacteriaceae;g__Methanobrevibacter_A;s__Methanobrevibacter_A smithii	SAMN02436678	PRJNA59547	United States	North America
GUT_GENOME143258	IMG_2547132053	PATRIC/IMG	Isolate	1797373	54	80226	31.13	99.2	0	NA	0	99.8	99.5	20	2547132053	GUT_GENOME132205	MGYG-HGUT-02163	d__Archaea;p__Methanobacteriota;c__Methanobacteria;o__Methanobacteriales;f__Methanobacteriaceae;g__Methanobrevibacter_A;s__Methanobrevibacter_A smithii	SAMN02436664	PRJNA59641	United States	North America
GUT_GENOME143259	IMG_2547132054	PATRIC/IMG	Isolate	1791997	66	73601	31.25	99.73	0	NA	0	99.8	99.5	20	2547132054	GUT_GENOME132205	MGYG-HGUT-02163	d__Archaea;p__Methanobacteriota;c__Methanobacteria;o__Methanobacteriales;f__Methanobacteriaceae;g__Methanobrevibacter_A;s__Methanobrevibacter_A smithii	SAMN02436679	PRJNA59643	United States	North America
GUT_GENOME143260	IMG_2547132055	PATRIC/IMG	Isolate	1794702	43	147680	31.14	100	0.8	NA	0	99.8	99.5	20	2547132055	GUT_GENOME132205	MGYG-HGUT-02163	d__Archaea;p__Methanobacteriota;c__Methanobacteria;o__Methanobacteriales;f__Methanobacteriaceae;g__Methanobrevibacter_A;s__Methanobrevibacter_A smithii	SAMN02436665	PRJNA59645	United States	North America
GUT_GENOME143261	IMG_2547132057	PATRIC/IMG	Isolate	1713264	33	139646	31.13	92.8	0	NA	0	99.8	99.5	20	2547132057	GUT_GENOME132205	MGYG-HGUT-02163	d__Archaea;p__Methanobacteriota;c__Methanobacteria;o__Methanobacteriales;f__Methanobacteriaceae;g__Methanobrevibacter_A;s__Methanobrevibacter_A smithii	SAMN02436666	PRJNA59655	United States	North America
GUT_GENOME143262	IMG_2547132058	PATRIC/IMG	Isolate	1952070	63	81915	30.42	96	3.2	NA	0	99.8	99.5	20	2547132058	GUT_GENOME143185	MGYG-HGUT-02446	d__Archaea;p__Methanobacteriota;c__Methanobacteria;o__Methanobacteriales;f__Methanobacteriaceae;g__Methanobrevibacter_A;s__Methanobrevibacter_A smithii_A	SAMN02436683	PRJNA59659	United States	North America
GUT_GENOME143263	IMG_2547132060	PATRIC/IMG	Isolate	1965064	40	99611	30.43	99.6	0	NA	0	99.8	99.5	20	2547132060	GUT_GENOME143185	MGYG-HGUT-02446	d__Archaea;p__Methanobacteriota;c__Methanobacteria;o__Methanobacteriales;f__Methanobacteriaceae;g__Methanobrevibacter_A;s__Methanobrevibacter_A smithii_A	SAMN02436668	PRJNA59665	United States	North America
GUT_GENOME143264	IMG_2547132061	PATRIC/IMG	Isolate	1973030	40	256349	30.45	99.94	0.8	NA	0	99.8	99.5	20	2547132061	GUT_GENOME143185	MGYG-HGUT-02446	d__Archaea;p__Methanobacteriota;c__Methanobacteria;o__Methanobacteriales;f__Methanobacteriaceae;g__Methanobrevibacter_A;s__Methanobrevibacter_A smithii_A	SAMN02436673	PRJNA59667	United States	North America
GUT_GENOME143265	IMG_2547132062	PATRIC/IMG	Isolate	1889378	47	120002	30.27	100	0	NA	0	99.8	99.5	20	2547132062	GUT_GENOME143185	MGYG-HGUT-02446	d__Archaea;p__Methanobacteriota;c__Methanobacteria;o__Methanobacteriales;f__Methanobacteriaceae;g__Methanobrevibacter_A;s__Methanobrevibacter_A smithii_A	SAMN02436680	PRJNA59669	United States	North America
GUT_GENOME143266	IMG_2547132063	PATRIC/IMG	Isolate	1886020	58	90573	30.27	100	0	NA	0	99.8	99.5	20	2547132063	GUT_GENOME143185	MGYG-HGUT-02446	d__Archaea;p__Methanobacteriota;c__Methanobacteria;o__Methanobacteriales;f__Methanobacteriaceae;g__Methanobrevibacter_A;s__Methanobrevibacter_A smithii_A	SAMN02436674	PRJNA59671	United States	North America
GUT_GENOME143267	IMG_2547132064	PATRIC/IMG	Isolate	1910054	50	108845	30.29	100	0.8	NA	0	99.8	99.5	20	2547132064	GUT_GENOME143185	MGYG-HGUT-02446	d__Archaea;p__Methanobacteriota;c__Methanobacteria;o__Methanobacteriales;f__Methanobacteriaceae;g__Methanobrevibacter_A;s__Methanobrevibacter_A smithii_A	SAMN02436675	PRJNA59693	United States	North America
GUT_GENOME143268	IMG_2547132065	PATRIC/IMG	Isolate	1992157	56	77936	30.22	99.2	0.8	NA	0	99.8	99.5	20	2547132065	GUT_GENOME143185	MGYG-HGUT-02446	d__Archaea;p__Methanobacteriota;c__Methanobacteria;o__Methanobacteriales;f__Methanobacteriaceae;g__Methanobrevibacter_A;s__Methanobrevibacter_A smithii_A	SAMN02436676	PRJNA59675	United States	North America
GUT_GENOME143269	IMG_2547132066	PATRIC/IMG	Isolate	1972498	44	133694	30.26	99.2	0	NA	0	99.8	99.5	20	2547132066	GUT_GENOME143185	MGYG-HGUT-02446	d__Archaea;p__Methanobacteriota;c__Methanobacteria;o__Methanobacteriales;f__Methanobacteriaceae;g__Methanobrevibacter_A;s__Methanobrevibacter_A smithii_A	SAMN02436677	PRJNA59677	United States	North America
GUT_GENOME143270	IMG_2547132067	PATRIC/IMG	Isolate	1978848	37	96923	30.24	100	0	NA	0	99.8	99.5	20	2547132067	GUT_GENOME143185	MGYG-HGUT-02446	d__Archaea;p__Methanobacteriota;c__Methanobacteria;o__Methanobacteriales;f__Methanobacteriaceae;g__Methanobrevibacter_A;s__Methanobrevibacter_A smithii_A	SAMN02436669	PRJNA59679	United States	North America
GUT_GENOME143271	IMG_2547132069	PATRIC/IMG	Isolate	1975004	47	98370	30.28	100	0	NA	0	99.8	99.5	20	2547132069	GUT_GENOME143185	MGYG-HGUT-02446	d__Archaea;p__Methanobacteriota;c__Methanobacteria;o__Methanobacteriales;f__Methanobacteriaceae;g__Methanobrevibacter_A;s__Methanobrevibacter_A smithii_A	SAMN02436671	PRJNA59683	United States	North America
GUT_GENOME143272	IMG_2547132070	PATRIC/IMG	Isolate	1869210	45	94662	30.28	94.4	0.8	NA	0	0	99.5	19	2547132070	GUT_GENOME143185	MGYG-HGUT-02446	d__Archaea;p__Methanobacteriota;c__Methanobacteria;o__Methanobacteriales;f__Methanobacteriaceae;g__Methanobrevibacter_A;s__Methanobrevibacter_A smithii_A	SAMN02436681	PRJNA59685	United States	North America
GUT_GENOME143273	IMG_2547132071	PATRIC/IMG	Isolate	1818239	108	43698	31.15	100	0	NA	0	0	99.5	20	2547132071	GUT_GENOME132205	MGYG-HGUT-02163	d__Archaea;p__Methanobacteriota;c__Methanobacteria;o__Methanobacteriales;f__Methanobacteriaceae;g__Methanobrevibacter_A;s__Methanobrevibacter_A smithii	SAMN02436672	PRJNA59687	United States	North America
GUT_GENOME143333	IMG_2554235424	PATRIC/IMG	Isolate	1931651	1	1931651	41.26	98.79	0.81	NA	92.44	99.86	99.03	20	2554235424	GUT_GENOME132202	MGYG-HGUT-02160	d__Archaea;p__Thermoplasmatota;c__Thermoplasmata;o__Methanomassiliicoccales;f__Methanomassiliicoccaceae;g__Methanomassiliicoccus_A;s__Methanomassiliicoccus_A intestinalis	SAMN03081468	PRJNA189659	France	Europe
GUT_GENOME143494	PATRIC_339860_19	PATRIC/IMG	Isolate	1767403	1	1767403	27.63	97.6	0	NA	0	99.8	99.43	20	339860	GUT_GENOME132206	MGYG-HGUT-02164	d__Archaea;p__Methanobacteriota;c__Methanobacteria;o__Methanobacteriales;f__Methanobacteriaceae;g__Methanosphaera;s__Methanosphaera stadtmanae	SAMN02604180	PRJNA15579	NA	NA
GUT_GENOME143658	PATRIC_483214_13	PATRIC/IMG	Isolate	1704865	24	226159	31.28	100	0.8	NA	0	99.8	96.19	20	483214	GUT_GENOME132205	MGYG-HGUT-02163	d__Archaea;p__Methanobacteriota;c__Methanobacteria;o__Methanobacteriales;f__Methanobacteriaceae;g__Methanobrevibacter_A;s__Methanobrevibacter_A smithii	SAMN00008835	PRJNA27821	NA	NA
GUT_GENOME143715	PATRIC_521002_11	PATRIC/IMG	Isolate	1727775	25	1043555	31.28	100	0	NA	0	99.8	99.5	20	521002	GUT_GENOME132205	MGYG-HGUT-02163	d__Archaea;p__Methanobacteriota;c__Methanobacteria;o__Methanobacteriales;f__Methanobacteriaceae;g__Methanobrevibacter_A;s__Methanobrevibacter_A smithii	SAMN00008834	PRJNA29303	NA	North America
GUT_GENOME148248	QinJ_2012__CON-025__bin.35	CIBIO	MAG	1956462	450	5379	31.76	92.24	0	0.1	0	0	99.5	20	NA	GUT_GENOME132205	MGYG-HGUT-02163	d__Archaea;p__Methanobacteriota;c__Methanobacteria;o__Methanobacteriales;f__Methanobacteriaceae;g__Methanobrevibacter_A;s__Methanobrevibacter_A smithii	NA	NA	China	Asia
GUT_GENOME148517	QinJ_2012__CON-042__bin.14	CIBIO	MAG	2446937	682	4094	32.83	90.09	0.27	0.28	0	0	0	18	NA	GUT_GENOME132205	MGYG-HGUT-02163	d__Archaea;p__Methanobacteriota;c__Methanobacteria;o__Methanobacteriales;f__Methanobacteriaceae;g__Methanobrevibacter_A;s__Methanobrevibacter_A smithii	NA	NA	China	Asia
GUT_GENOME149020	QinJ_2012__CON-073__bin.40	CIBIO	MAG	1255775	188	8414	32.1	88.13	0	0.12	0	0	0	17	NA	GUT_GENOME132205	MGYG-HGUT-02163	d__Archaea;p__Methanobacteriota;c__Methanobacteria;o__Methanobacteriales;f__Methanobacteriaceae;g__Methanobrevibacter_A;s__Methanobrevibacter_A smithii	NA	NA	China	Asia
GUT_GENOME150013	QinJ_2012__DLM022__bin.36	CIBIO	MAG	1733432	53	50890	31.24	100	0	0.05	0	0	0	20	NA	GUT_GENOME132205	MGYG-HGUT-02163	d__Archaea;p__Methanobacteriota;c__Methanobacteria;o__Methanobacteriales;f__Methanobacteriaceae;g__Methanobrevibacter_A;s__Methanobrevibacter_A smithii	SRS259523	SRP008047	China	Asia
GUT_GENOME152478	QinJ_2012__T2D-064__bin.46	CIBIO	MAG	912260	309	3134	32.63	55.47	0	0.42	0	0	0	4	NA	GUT_GENOME132205	MGYG-HGUT-02163	d__Archaea;p__Methanobacteriota;c__Methanobacteria;o__Methanobacteriales;f__Methanobacteriaceae;g__Methanobrevibacter_A;s__Methanobrevibacter_A smithii	NA	NA	China	Asia
GUT_GENOME152649	QinJ_2012__T2D-072__bin.46	CIBIO	MAG	1807723	35	122422	31.27	99.2	0	0.05	0	0	0	20	NA	GUT_GENOME132205	MGYG-HGUT-02163	d__Archaea;p__Methanobacteriota;c__Methanobacteria;o__Methanobacteriales;f__Methanobacteriaceae;g__Methanobrevibacter_A;s__Methanobrevibacter_A smithii	NA	NA	China	Asia
GUT_GENOME152906	QinJ_2012__T2D-085__bin.60	CIBIO	MAG	1766630	148	17973	31.29	96.4	0	0.05	0	99.8	99.5	20	NA	GUT_GENOME132205	MGYG-HGUT-02163	d__Archaea;p__Methanobacteriota;c__Methanobacteria;o__Methanobacteriales;f__Methanobacteriaceae;g__Methanobrevibacter_A;s__Methanobrevibacter_A smithii	NA	NA	China	Asia
GUT_GENOME153214	QinJ_2012__T2D-099__bin.74	CIBIO	MAG	1805188	28	74148	31.1	100	0	0.05	0	0	0	20	NA	GUT_GENOME132205	MGYG-HGUT-02163	d__Archaea;p__Methanobacteriota;c__Methanobacteria;o__Methanobacteriales;f__Methanobacteriaceae;g__Methanobrevibacter_A;s__Methanobrevibacter_A smithii	NA	NA	China	Asia
GUT_GENOME153858	QinN_2014__HD-33__bin.42	CIBIO	MAG	1527362	102	20631	56.4	95.97	2.02	0.06	87.39	99.8	99.13	20	NA	GUT_GENOME143252	MGYG-HGUT-02456	d__Archaea;p__Thermoplasmatota;c__Thermoplasmata;o__Methanomassiliicoccales;f__Methanomethylophilaceae;g__Methanomethylophilus;s__Methanomethylophilus alvus	ERS475139	ERP005860	China	Asia
GUT_GENOME155212	QinN_2014__HV-8__bin.10	CIBIO	MAG	1520596	189	11081	56.52	94.16	1.61	0.07	0	99.8	99.13	19	NA	GUT_GENOME143252	MGYG-HGUT-02456	d__Archaea;p__Thermoplasmatota;c__Thermoplasmata;o__Methanomassiliicoccales;f__Methanomethylophilaceae;g__Methanomethylophilus;s__Methanomethylophilus alvus	ERS475245	ERP005860	China	Asia
GUT_GENOME157247	RampelliS_2015__H17__bin.19	CIBIO	MAG	656243	224	2973	49.37	57.39	0.81	0.37	0	0	0	5	NA	GUT_GENOME020782	MGYG-HGUT-00654	d__Archaea;p__Thermoplasmatota;c__Thermoplasmata;o__Methanomassiliicoccales;f__Methanomethylophilaceae;g__;s__	SRS883021	SRP056480	United Republic of Tanzania	Africa
GUT_GENOME157249	RampelliS_2015__H17__bin.27	CIBIO	MAG	1579031	355	5282	58.16	82.24	1.21	0.32	86.55	0	0	20	NA	GUT_GENOME268463	MGYG-HGUT-04339	d__Archaea;p__Thermoplasmatota;c__Thermoplasmata;o__Methanomassiliicoccales;f__Methanomethylophilaceae;g__UBA71;s__	SRS883021	SRP056480	United Republic of Tanzania	Africa
GUT_GENOME157493	RampelliS_2015__IT2__bin.6	CIBIO	MAG	1577612	501	3338	30.8	72.36	0.45	0.64	0	0	0	19	NA	GUT_GENOME143185	MGYG-HGUT-02446	d__Archaea;p__Methanobacteriota;c__Methanobacteria;o__Methanobacteriales;f__Methanobacteriaceae;g__Methanobrevibacter_A;s__Methanobrevibacter_A smithii_A	SRS883067	SRP056480	Italy	Europe
GUT_GENOME157820	RaymondF_2016__P13E7__bin.31	CIBIO	MAG	1035092	357	3052	32.86	68.51	1.09	0.02	0	0	0	12	NA	GUT_GENOME132205	MGYG-HGUT-02163	d__Archaea;p__Methanobacteriota;c__Methanobacteria;o__Methanobacteriales;f__Methanobacteriaceae;g__Methanobrevibacter_A;s__Methanobrevibacter_A smithii	ERS634943	ERP009131	Canada	North America
GUT_GENOME158242	RaymondF_2016__P19E0__bin.36	CIBIO	MAG	1725971	78	45723	31.15	100	0	0.01	0	0	0	20	NA	GUT_GENOME132205	MGYG-HGUT-02163	d__Archaea;p__Methanobacteriota;c__Methanobacteria;o__Methanobacteriales;f__Methanobacteriaceae;g__Methanobrevibacter_A;s__Methanobrevibacter_A smithii	ERS634924	ERP009131	Canada	North America
GUT_GENOME158288	RaymondF_2016__P19E7__bin.29	CIBIO	MAG	898133	329	2866	32.95	52.74	0	0	0	0	0	7	NA	GUT_GENOME132205	MGYG-HGUT-02163	d__Archaea;p__Methanobacteriota;c__Methanobacteria;o__Methanobacteriales;f__Methanobacteriaceae;g__Methanobrevibacter_A;s__Methanobrevibacter_A smithii	ERS634948	ERP009131	Canada	North America
GUT_GENOME159741	SchirmerM_2016__G88692__bin.18	CIBIO	MAG	1387423	375	4386	32.4	91.84	0	0.01	0	0	0	16	NA	GUT_GENOME132205	MGYG-HGUT-02163	d__Archaea;p__Methanobacteriota;c__Methanobacteria;o__Methanobacteriales;f__Methanobacteriaceae;g__Methanobrevibacter_A;s__Methanobrevibacter_A smithii	SRS1876353	SRP095580	Netherlands	Europe
GUT_GENOME159774	SchirmerM_2016__G88703__bin.5	CIBIO	MAG	1494473	314	5582	32.22	89.84	0	0.01	0	0	0	20	NA	GUT_GENOME132205	MGYG-HGUT-02163	d__Archaea;p__Methanobacteriota;c__Methanobacteria;o__Methanobacteriales;f__Methanobacteriaceae;g__Methanobrevibacter_A;s__Methanobrevibacter_A smithii	SRS1876728	SRP095580	Netherlands	Europe
GUT_GENOME159990	SchirmerM_2016__G88738__bin.6	CIBIO	MAG	1246882	431	3089	32.42	74.95	0	0.02	0	0	0	8	NA	GUT_GENOME143185	MGYG-HGUT-02446	d__Archaea;p__Methanobacteriota;c__Methanobacteria;o__Methanobacteriales;f__Methanobacteriaceae;g__Methanobrevibacter_A;s__Methanobrevibacter_A smithii_A	SRS1876581	SRP095580	Netherlands	Europe
GUT_GENOME160229	SchirmerM_2016__G88773__bin.9	CIBIO	MAG	1737321	379	5519	32.04	91.14	0.8	0.01	0	0	0	16	NA	GUT_GENOME132205	MGYG-HGUT-02163	d__Archaea;p__Methanobacteriota;c__Methanobacteria;o__Methanobacteriales;f__Methanobacteriaceae;g__Methanobrevibacter_A;s__Methanobrevibacter_A smithii	SRS1876665	SRP095580	Netherlands	Europe
GUT_GENOME160251	SchirmerM_2016__G88778__bin.14	CIBIO	MAG	1104144	397	2841	32.25	71.41	0.1	0.02	0	0	99.5	6	NA	GUT_GENOME143185	MGYG-HGUT-02446	d__Archaea;p__Methanobacteriota;c__Methanobacteria;o__Methanobacteriales;f__Methanobacteriaceae;g__Methanobrevibacter_A;s__Methanobrevibacter_A smithii_A	SRS1876476	SRP095580	Netherlands	Europe
GUT_GENOME160306	SchirmerM_2016__G88783__bin.12	CIBIO	MAG	729493	314	2337	33.57	58.14	0.13	0.06	0	0	0	4	NA	GUT_GENOME132205	MGYG-HGUT-02163	d__Archaea;p__Methanobacteriota;c__Methanobacteria;o__Methanobacteriales;f__Methanobacteriaceae;g__Methanobrevibacter_A;s__Methanobrevibacter_A smithii	SRS1876382	SRP095580	Netherlands	Europe
GUT_GENOME160333	SchirmerM_2016__G88785__bin.6	CIBIO	MAG	1048101	425	2414	32.7	59.08	1.25	0.06	0	0	0	5	NA	GUT_GENOME143185	MGYG-HGUT-02446	d__Archaea;p__Methanobacteriota;c__Methanobacteria;o__Methanobacteriales;f__Methanobacteriaceae;g__Methanobrevibacter_A;s__Methanobrevibacter_A smithii_A	SRS1876582	SRP095580	Netherlands	Europe
GUT_GENOME160371	SchirmerM_2016__G88789__bin.4	CIBIO	MAG	1020751	431	2359	33.37	57.85	1.33	0.07	0	0	0	7	NA	GUT_GENOME132205	MGYG-HGUT-02163	d__Archaea;p__Methanobacteriota;c__Methanobacteria;o__Methanobacteriales;f__Methanobacteriaceae;g__Methanobrevibacter_A;s__Methanobrevibacter_A smithii	SRS1876390	SRP095580	Netherlands	Europe
GUT_GENOME160444	SchirmerM_2016__G88796__bin.46	CIBIO	MAG	1688236	400	4942	32.21	91.54	0.8	0.02	93.28	0	21.94	16	NA	GUT_GENOME132205	MGYG-HGUT-02163	d__Archaea;p__Methanobacteriota;c__Methanobacteria;o__Methanobacteriales;f__Methanobacteriaceae;g__Methanobrevibacter_A;s__Methanobrevibacter_A smithii	SRS1876434	SRP095580	Netherlands	Europe
GUT_GENOME160450	SchirmerM_2016__G88797__bin.13	CIBIO	MAG	1494093	369	4791	32.31	82.97	0	0.01	0	0	89.2	13	NA	GUT_GENOME132205	MGYG-HGUT-02163	d__Archaea;p__Methanobacteriota;c__Methanobacteria;o__Methanobacteriales;f__Methanobacteriaceae;g__Methanobrevibacter_A;s__Methanobrevibacter_A smithii	SRS1876641	SRP095580	Netherlands	Europe
GUT_GENOME160484	SchirmerM_2016__G88801__bin.18	CIBIO	MAG	1399046	415	3719	31.97	85.2	2.28	0.01	0	0	0	14	NA	GUT_GENOME143185	MGYG-HGUT-02446	d__Archaea;p__Methanobacteriota;c__Methanobacteria;o__Methanobacteriales;f__Methanobacteriaceae;g__Methanobrevibacter_A;s__Methanobrevibacter_A smithii_A	SRS1876475	SRP095580	Netherlands	Europe
GUT_GENOME160561	SchirmerM_2016__G88812__bin.21	CIBIO	MAG	1308802	387	3893	32.03	71.2	2.63	0.02	0	0	0	12	NA	GUT_GENOME143185	MGYG-HGUT-02446	d__Archaea;p__Methanobacteriota;c__Methanobacteria;o__Methanobacteriales;f__Methanobacteriaceae;g__Methanobrevibacter_A;s__Methanobrevibacter_A smithii_A	SRS1876676	SRP095580	Netherlands	Europe
GUT_GENOME160586	SchirmerM_2016__G88815__bin.12	CIBIO	MAG	897766	353	2550	33.52	56.93	0	0.03	0	0	0	5	NA	GUT_GENOME132205	MGYG-HGUT-02163	d__Archaea;p__Methanobacteriota;c__Methanobacteria;o__Methanobacteriales;f__Methanobacteriaceae;g__Methanobrevibacter_A;s__Methanobrevibacter_A smithii	SRS1876417	SRP095580	Netherlands	Europe
GUT_GENOME160708	SchirmerM_2016__G88829__bin.6	CIBIO	MAG	1190776	390	3300	32.79	79.11	0.8	0.01	0	0	34.95	11	NA	GUT_GENOME132205	MGYG-HGUT-02163	d__Archaea;p__Methanobacteriota;c__Methanobacteria;o__Methanobacteriales;f__Methanobacteriaceae;g__Methanobrevibacter_A;s__Methanobrevibacter_A smithii	SRS1876296	SRP095580	Netherlands	Europe
GUT_GENOME161017	SchirmerM_2016__G88869__bin.7	CIBIO	MAG	1223291	415	3155	32.93	70.26	0.04	0.02	0	0	99.5	10	NA	GUT_GENOME132205	MGYG-HGUT-02163	d__Archaea;p__Methanobacteriota;c__Methanobacteria;o__Methanobacteriales;f__Methanobacteriaceae;g__Methanobrevibacter_A;s__Methanobrevibacter_A smithii	SRS1876414	SRP095580	Netherlands	Europe
GUT_GENOME161035	SchirmerM_2016__G88871__bin.21	CIBIO	MAG	999596	367	2980	33.07	66.58	0.8	0.02	0	0	0	3	NA	GUT_GENOME132205	MGYG-HGUT-02163	d__Archaea;p__Methanobacteriota;c__Methanobacteria;o__Methanobacteriales;f__Methanobacteriaceae;g__Methanobrevibacter_A;s__Methanobrevibacter_A smithii	SRS1876500	SRP095580	Netherlands	Europe
GUT_GENOME161057	SchirmerM_2016__G88873__bin.5	CIBIO	MAG	1385749	413	3611	32.66	84.18	1.2	0.02	0	0	99.5	15	NA	GUT_GENOME132205	MGYG-HGUT-02163	d__Archaea;p__Methanobacteriota;c__Methanobacteria;o__Methanobacteriales;f__Methanobacteriaceae;g__Methanobrevibacter_A;s__Methanobrevibacter_A smithii	SRS1876444	SRP095580	Netherlands	Europe
GUT_GENOME161226	SchirmerM_2016__G88892__bin.4	CIBIO	MAG	1475282	399	4212	32.4	85.2	0	0.02	0	0	0	20	NA	GUT_GENOME132205	MGYG-HGUT-02163	d__Archaea;p__Methanobacteriota;c__Methanobacteria;o__Methanobacteriales;f__Methanobacteriaceae;g__Methanobrevibacter_A;s__Methanobrevibacter_A smithii	SRS1876263	SRP095580	Netherlands	Europe
GUT_GENOME161232	SchirmerM_2016__G88893__bin.11	CIBIO	MAG	919174	376	2529	33.07	60.94	0	0.02	0	0	0	3	NA	GUT_GENOME132205	MGYG-HGUT-02163	d__Archaea;p__Methanobacteriota;c__Methanobacteria;o__Methanobacteriales;f__Methanobacteriaceae;g__Methanobrevibacter_A;s__Methanobrevibacter_A smithii	SRS1876623	SRP095580	Netherlands	Europe
GUT_GENOME161287	SchirmerM_2016__G88898__bin.8	CIBIO	MAG	878128	360	2456	33.45	54.45	0.04	0.01	0	0	0	4	NA	GUT_GENOME132205	MGYG-HGUT-02163	d__Archaea;p__Methanobacteriota;c__Methanobacteria;o__Methanobacteriales;f__Methanobacteriaceae;g__Methanobrevibacter_A;s__Methanobrevibacter_A smithii	SRS1876488	SRP095580	Netherlands	Europe
GUT_GENOME161291	SchirmerM_2016__G88899__bin.14	CIBIO	MAG	1278731	459	2934	32.9	71.01	0	0.02	0	0	0	6	NA	GUT_GENOME132205	MGYG-HGUT-02163	d__Archaea;p__Methanobacteriota;c__Methanobacteria;o__Methanobacteriales;f__Methanobacteriaceae;g__Methanobrevibacter_A;s__Methanobrevibacter_A smithii	SRS1876573	SRP095580	Netherlands	Europe
GUT_GENOME161632	SchirmerM_2016__G88938__bin.11	CIBIO	MAG	1290038	380	3725	32.46	83.78	2.4	0.02	0	0	0	14	NA	GUT_GENOME132205	MGYG-HGUT-02163	d__Archaea;p__Methanobacteriota;c__Methanobacteria;o__Methanobacteriales;f__Methanobacteriaceae;g__Methanobrevibacter_A;s__Methanobrevibacter_A smithii	SRS1876590	SRP095580	Netherlands	Europe
GUT_GENOME161705	SchirmerM_2016__G88944__bin.16	CIBIO	MAG	1353721	385	4043	32.46	83.91	0	0.01	0	0	0	6	NA	GUT_GENOME132205	MGYG-HGUT-02163	d__Archaea;p__Methanobacteriota;c__Methanobacteria;o__Methanobacteriales;f__Methanobacteriaceae;g__Methanobrevibacter_A;s__Methanobrevibacter_A smithii	SRS1876576	SRP095580	Netherlands	Europe
GUT_GENOME161846	SchirmerM_2016__G88966__bin.11	CIBIO	MAG	1508340	399	4452	32.3	90.74	0.1	0.01	0	0	0	15	NA	GUT_GENOME132205	MGYG-HGUT-02163	d__Archaea;p__Methanobacteriota;c__Methanobacteria;o__Methanobacteriales;f__Methanobacteriaceae;g__Methanobrevibacter_A;s__Methanobrevibacter_A smithii	SRS1876431	SRP095580	Netherlands	Europe
GUT_GENOME161886	SchirmerM_2016__G88971__bin.3	CIBIO	MAG	1406284	460	3338	32.27	73.78	1.33	0.01	0	0	0	15	NA	GUT_GENOME143185	MGYG-HGUT-02446	d__Archaea;p__Methanobacteriota;c__Methanobacteria;o__Methanobacteriales;f__Methanobacteriaceae;g__Methanobrevibacter_A;s__Methanobrevibacter_A smithii_A	SRS1876365	SRP095580	Netherlands	Europe
GUT_GENOME161934	SchirmerM_2016__G88977__bin.5	CIBIO	MAG	1473546	523	2965	33.03	72.45	0.84	0.05	0	0	0	6	NA	GUT_GENOME132205	MGYG-HGUT-02163	d__Archaea;p__Methanobacteriota;c__Methanobacteria;o__Methanobacteriales;f__Methanobacteriaceae;g__Methanobrevibacter_A;s__Methanobrevibacter_A smithii	SRS1876477	SRP095580	Netherlands	Europe
GUT_GENOME162009	SchirmerM_2016__G88986__bin.6	CIBIO	MAG	1585376	478	3664	32.96	81.63	0.04	0.03	0	0	0	14	NA	GUT_GENOME132205	MGYG-HGUT-02163	d__Archaea;p__Methanobacteriota;c__Methanobacteria;o__Methanobacteriales;f__Methanobacteriaceae;g__Methanobrevibacter_A;s__Methanobrevibacter_A smithii	SRS1876370	SRP095580	Netherlands	Europe
GUT_GENOME162198	SchirmerM_2016__G89006__bin.3	CIBIO	MAG	1520438	302	6014	32.23	92.34	0	0.01	0	0	0	13	NA	GUT_GENOME132205	MGYG-HGUT-02163	d__Archaea;p__Methanobacteriota;c__Methanobacteria;o__Methanobacteriales;f__Methanobacteriaceae;g__Methanobrevibacter_A;s__Methanobrevibacter_A smithii	SRS1876459	SRP095580	Netherlands	Europe
GUT_GENOME162514	SchirmerM_2016__G89037__bin.12	CIBIO	MAG	1156941	434	2770	33.19	63.22	0	0.02	0	0	99.5	8	NA	GUT_GENOME132205	MGYG-HGUT-02163	d__Archaea;p__Methanobacteriota;c__Methanobacteria;o__Methanobacteriales;f__Methanobacteriaceae;g__Methanobrevibacter_A;s__Methanobrevibacter_A smithii	SRS1876322	SRP095580	Netherlands	Europe
GUT_GENOME162548	SchirmerM_2016__G89040__bin.16	CIBIO	MAG	1341914	427	3389	32.81	81.88	0	0.02	0	0	0	8	NA	GUT_GENOME132205	MGYG-HGUT-02163	d__Archaea;p__Methanobacteriota;c__Methanobacteria;o__Methanobacteriales;f__Methanobacteriaceae;g__Methanobrevibacter_A;s__Methanobrevibacter_A smithii	SRS1876378	SRP095580	Netherlands	Europe
GUT_GENOME162573	SchirmerM_2016__G89043__bin.21	CIBIO	MAG	1331818	384	3822	32.65	85.14	0	0.02	0	0	50.47	10	NA	GUT_GENOME132205	MGYG-HGUT-02163	d__Archaea;p__Methanobacteriota;c__Methanobacteria;o__Methanobacteriales;f__Methanobacteriaceae;g__Methanobrevibacter_A;s__Methanobrevibacter_A smithii	SRS1876487	SRP095580	Netherlands	Europe
GUT_GENOME162721	SchirmerM_2016__G89058__bin.34	CIBIO	MAG	1594692	418	4385	32.49	86.47	0	0.01	0	0	0	14	NA	GUT_GENOME132205	MGYG-HGUT-02163	d__Archaea;p__Methanobacteriota;c__Methanobacteria;o__Methanobacteriales;f__Methanobacteriaceae;g__Methanobrevibacter_A;s__Methanobrevibacter_A smithii	SRS1876366	SRP095580	Netherlands	Europe
GUT_GENOME162792	SchirmerM_2016__G89065__bin.11	CIBIO	MAG	1736580	482	4079	32.45	89.14	0.8	0.07	0	0	0	14	NA	GUT_GENOME132205	MGYG-HGUT-02163	d__Archaea;p__Methanobacteriota;c__Methanobacteria;o__Methanobacteriales;f__Methanobacteriaceae;g__Methanobrevibacter_A;s__Methanobrevibacter_A smithii	SRS1876639	SRP095580	Netherlands	Europe
GUT_GENOME162989	SchirmerM_2016__G89084__bin.10	CIBIO	MAG	1450550	353	4784	32.29	91.6	0	0	0	0	0	16	NA	GUT_GENOME132205	MGYG-HGUT-02163	d__Archaea;p__Methanobacteriota;c__Methanobacteria;o__Methanobacteriales;f__Methanobacteriaceae;g__Methanobrevibacter_A;s__Methanobrevibacter_A smithii	SRS1876492	SRP095580	Netherlands	Europe
GUT_GENOME163007	SchirmerM_2016__G89085__bin.28	CIBIO	MAG	1439733	346	4944	32.42	85.14	2.4	0.01	0	0	0	18	NA	GUT_GENOME132205	MGYG-HGUT-02163	d__Archaea;p__Methanobacteriota;c__Methanobacteria;o__Methanobacteriales;f__Methanobacteriaceae;g__Methanobrevibacter_A;s__Methanobrevibacter_A smithii	SRS1876495	SRP095580	Netherlands	Europe
GUT_GENOME163051	SchirmerM_2016__G89092__bin.17	CIBIO	MAG	1477495	445	3638	31.99	88.07	1.6	0.01	0	0	28.96	14	NA	GUT_GENOME143185	MGYG-HGUT-02446	d__Archaea;p__Methanobacteriota;c__Methanobacteria;o__Methanobacteriales;f__Methanobacteriaceae;g__Methanobrevibacter_A;s__Methanobrevibacter_A smithii_A	SRS1876583	SRP095580	Netherlands	Europe
GUT_GENOME163069	SchirmerM_2016__G89093__bin.6	CIBIO	MAG	1661637	481	4000	32.9	84.87	0.8	0.02	0	0	0	13	NA	GUT_GENOME132205	MGYG-HGUT-02163	d__Archaea;p__Methanobacteriota;c__Methanobacteria;o__Methanobacteriales;f__Methanobacteriaceae;g__Methanobrevibacter_A;s__Methanobrevibacter_A smithii	SRS1876690	SRP095580	Netherlands	Europe
GUT_GENOME163102	SchirmerM_2016__G89098__bin.12	CIBIO	MAG	1594375	346	5670	32.15	91.54	0	0.01	0	0	0	15	NA	GUT_GENOME132205	MGYG-HGUT-02163	d__Archaea;p__Methanobacteriota;c__Methanobacteria;o__Methanobacteriales;f__Methanobacteriaceae;g__Methanobrevibacter_A;s__Methanobrevibacter_A smithii	SRS1876619	SRP095580	Netherlands	Europe
GUT_GENOME163126	SchirmerM_2016__G89101__bin.15	CIBIO	MAG	1143035	401	3075	32.91	68.81	0	0.02	0	0	0	5	NA	GUT_GENOME132205	MGYG-HGUT-02163	d__Archaea;p__Methanobacteriota;c__Methanobacteria;o__Methanobacteriales;f__Methanobacteriaceae;g__Methanobrevibacter_A;s__Methanobrevibacter_A smithii	SRS1876566	SRP095580	Netherlands	Europe
GUT_GENOME163187	SchirmerM_2016__G89109__bin.2	CIBIO	MAG	833192	324	2576	33.33	61.25	0	0.01	0	0	0	3	NA	GUT_GENOME132205	MGYG-HGUT-02163	d__Archaea;p__Methanobacteriota;c__Methanobacteria;o__Methanobacteriales;f__Methanobacteriaceae;g__Methanobrevibacter_A;s__Methanobrevibacter_A smithii	SRS1876663	SRP095580	Netherlands	Europe
GUT_GENOME163212	SchirmerM_2016__G89113__bin.16	CIBIO	MAG	829393	322	2587	33.55	56.62	0.86	0.02	0	0	0	2	NA	GUT_GENOME132205	MGYG-HGUT-02163	d__Archaea;p__Methanobacteriota;c__Methanobacteria;o__Methanobacteriales;f__Methanobacteriaceae;g__Methanobrevibacter_A;s__Methanobrevibacter_A smithii	SRS1876406	SRP095580	Netherlands	Europe
GUT_GENOME163671	SchirmerM_2016__G89164__bin.2	CIBIO	MAG	1509411	354	5057	32.22	91.54	0	0.01	0	0	0	15	NA	GUT_GENOME132205	MGYG-HGUT-02163	d__Archaea;p__Methanobacteriota;c__Methanobacteria;o__Methanobacteriales;f__Methanobacteriaceae;g__Methanobrevibacter_A;s__Methanobrevibacter_A smithii	SRS1876621	SRP095580	Netherlands	Europe
GUT_GENOME163858	SchirmerM_2016__G89189__bin.11	CIBIO	MAG	1511879	362	4972	32.31	88.58	0	0.01	0	0	0	15	NA	GUT_GENOME132205	MGYG-HGUT-02163	d__Archaea;p__Methanobacteriota;c__Methanobacteria;o__Methanobacteriales;f__Methanobacteriaceae;g__Methanobrevibacter_A;s__Methanobrevibacter_A smithii	SRS1876449	SRP095580	Netherlands	Europe
GUT_GENOME163879	SchirmerM_2016__G89192__bin.5	CIBIO	MAG	1260939	393	3509	32.8	74.47	3.23	0.02	0	0	0	10	NA	GUT_GENOME132205	MGYG-HGUT-02163	d__Archaea;p__Methanobacteriota;c__Methanobacteria;o__Methanobacteriales;f__Methanobacteriaceae;g__Methanobrevibacter_A;s__Methanobrevibacter_A smithii	SRS1876717	SRP095580	Netherlands	Europe
GUT_GENOME164077	SchirmerM_2016__G89266__bin.13	CIBIO	MAG	1336915	450	3243	32.87	74.74	0	0.06	0	0	0	10	NA	GUT_GENOME132205	MGYG-HGUT-02163	d__Archaea;p__Methanobacteriota;c__Methanobacteria;o__Methanobacteriales;f__Methanobacteriaceae;g__Methanobrevibacter_A;s__Methanobrevibacter_A smithii	SRS1876486	SRP095580	Netherlands	Europe
GUT_GENOME164099	SchirmerM_2016__G89268__bin.2	CIBIO	MAG	1356402	435	3357	32.81	81.19	0.8	0.02	0	0	0	12	NA	GUT_GENOME132205	MGYG-HGUT-02163	d__Archaea;p__Methanobacteriota;c__Methanobacteria;o__Methanobacteriales;f__Methanobacteriaceae;g__Methanobrevibacter_A;s__Methanobrevibacter_A smithii	SRS1876330	SRP095580	Netherlands	Europe
GUT_GENOME164142	SchirmerM_2016__G89274__bin.11	CIBIO	MAG	1005875	388	2645	33.17	56.44	0.8	0.02	0	0	0	4	NA	GUT_GENOME132205	MGYG-HGUT-02163	d__Archaea;p__Methanobacteriota;c__Methanobacteria;o__Methanobacteriales;f__Methanobacteriaceae;g__Methanobrevibacter_A;s__Methanobrevibacter_A smithii	SRS1876534	SRP095580	Netherlands	Europe
GUT_GENOME164208	SmitsSA_2017__TZ_37609__bin.3	CIBIO	MAG	880694	357	2476	31.78	50.77	0	0.14	0	0	0	3	NA	GUT_GENOME132205	MGYG-HGUT-02163	d__Archaea;p__Methanobacteriota;c__Methanobacteria;o__Methanobacteriales;f__Methanobacteriaceae;g__Methanobrevibacter_A;s__Methanobrevibacter_A smithii	SRS2320650	SRP110665	United Republic of Tanzania	Africa
GUT_GENOME164211	SmitsSA_2017__TZ_39371__bin.4	CIBIO	MAG	1132587	455	2523	30.98	54.74	0	0.17	0	0	0	4	NA	GUT_GENOME132205	MGYG-HGUT-02163	d__Archaea;p__Methanobacteriota;c__Methanobacteria;o__Methanobacteriales;f__Methanobacteriaceae;g__Methanobrevibacter_A;s__Methanobrevibacter_A smithii	SRS2320631	SRP110665	United Republic of Tanzania	Africa
GUT_GENOME164215	SmitsSA_2017__TZ_42041__bin.1	CIBIO	MAG	1023776	415	2416	32.04	56.2	0.8	0.13	0	0	99.5	3	NA	GUT_GENOME132205	MGYG-HGUT-02163	d__Archaea;p__Methanobacteriota;c__Methanobacteria;o__Methanobacteriales;f__Methanobacteriaceae;g__Methanobrevibacter_A;s__Methanobrevibacter_A smithii	SRS2320637	SRP110665	United Republic of Tanzania	Africa
GUT_GENOME164245	SmitsSA_2017__TZ_83627__bin.2	CIBIO	MAG	1063868	316	3819	32.32	73.04	0	0.05	0	0	0	12	NA	GUT_GENOME132205	MGYG-HGUT-02163	d__Archaea;p__Methanobacteriota;c__Methanobacteria;o__Methanobacteriales;f__Methanobacteriaceae;g__Methanobrevibacter_A;s__Methanobrevibacter_A smithii	SRS2320634	SRP110665	United Republic of Tanzania	Africa
GUT_GENOME164416	SRR1196456_bin.15	EBI	MAG	1768738	46	90801	31.09	100	0	0.01	0	0	0	20	NA	GUT_GENOME132205	MGYG-HGUT-02163	d__Archaea;p__Methanobacteriota;c__Methanobacteria;o__Methanobacteriales;f__Methanobacteriaceae;g__Methanobrevibacter_A;s__Methanobrevibacter_A smithii	SRS576101	SRP040146	United States	North America
GUT_GENOME170034	SRR1761677_bin.25	EBI	MAG	854117	10	204039	31.27	50.4	0	0.01	0	0	0	15	NA	GUT_GENOME132205	MGYG-HGUT-02163	d__Archaea;p__Methanobacteriota;c__Methanobacteria;o__Methanobacteriales;f__Methanobacteriaceae;g__Methanobrevibacter_A;s__Methanobrevibacter_A smithii	SRS820585	SRP052307	United States	North America
GUT_GENOME170063	SRR1761678_bin.46	EBI	MAG	1561074	305	5866	31.11	81.6	2.4	0.21	0	0	0	19	NA	GUT_GENOME132205	MGYG-HGUT-02163	d__Archaea;p__Methanobacteriota;c__Methanobacteria;o__Methanobacteriales;f__Methanobacteriaceae;g__Methanobrevibacter_A;s__Methanobrevibacter_A smithii	SRS820586	SRP052307	United States	North America
GUT_GENOME170225	SRR1761687_bin.35	EBI	MAG	1561415	98	23540	30.75	88.8	2.8	0.14	0	0	99.5	20	NA	GUT_GENOME143185	MGYG-HGUT-02446	d__Archaea;p__Methanobacteriota;c__Methanobacteria;o__Methanobacteriales;f__Methanobacteriaceae;g__Methanobrevibacter_A;s__Methanobrevibacter_A smithii_A	SRS820595	SRP052307	United States	North America
GUT_GENOME170461	SRR1761699_bin.3	EBI	MAG	880771	52	27883	31.39	60.8	0.04	0.45	0	0	0	19	NA	GUT_GENOME143185	MGYG-HGUT-02446	d__Archaea;p__Methanobacteriota;c__Methanobacteria;o__Methanobacteriales;f__Methanobacteriaceae;g__Methanobrevibacter_A;s__Methanobrevibacter_A smithii_A	SRS820607	SRP052307	Peru	South America
GUT_GENOME170506	SRR1761702_bin.34	EBI	MAG	1773404	53	55007	30.42	100	0.8	0.06	0	0	0	20	NA	GUT_GENOME143185	MGYG-HGUT-02446	d__Archaea;p__Methanobacteriota;c__Methanobacteria;o__Methanobacteriales;f__Methanobacteriaceae;g__Methanobrevibacter_A;s__Methanobrevibacter_A smithii_A	SRS820610	SRP052307	Peru	South America
GUT_GENOME170527	SRR1761703_bin.53	EBI	MAG	1838825	214	12420	30.41	92	2.4	0.47	0	0	0	20	NA	GUT_GENOME143185	MGYG-HGUT-02446	d__Archaea;p__Methanobacteriota;c__Methanobacteria;o__Methanobacteriales;f__Methanobacteriaceae;g__Methanobrevibacter_A;s__Methanobrevibacter_A smithii_A	SRS820614	SRP052307	Peru	South America
GUT_GENOME170537	SRR1761704_bin.39	EBI	MAG	2111263	312	8048	30.18	94.89	4.8	0.46	0	99.8	99.5	20	NA	GUT_GENOME143185	MGYG-HGUT-02446	d__Archaea;p__Methanobacteriota;c__Methanobacteria;o__Methanobacteriales;f__Methanobacteriaceae;g__Methanobrevibacter_A;s__Methanobrevibacter_A smithii_A	SRS820611	SRP052307	Peru	South America
GUT_GENOME170659	SRR1761713_bin.30	EBI	MAG	1331127	84	20244	30.95	87.84	1.27	0.07	0	0	0	19	NA	GUT_GENOME143185	MGYG-HGUT-02446	d__Archaea;p__Methanobacteriota;c__Methanobacteria;o__Methanobacteriales;f__Methanobacteriaceae;g__Methanobrevibacter_A;s__Methanobrevibacter_A smithii_A	SRS820621	SRP052307	Peru	South America
GUT_GENOME170699	SRR1761716_bin.17	EBI	MAG	1689303	84	30859	30.71	95.84	0	0.06	0	0	0	20	NA	GUT_GENOME143185	MGYG-HGUT-02446	d__Archaea;p__Methanobacteriota;c__Methanobacteria;o__Methanobacteriales;f__Methanobacteriaceae;g__Methanobrevibacter_A;s__Methanobrevibacter_A smithii_A	SRS820624	SRP052307	Peru	South America
GUT_GENOME170711	SRR1761717_bin.16	EBI	MAG	1287444	23	75904	30.76	87.2	0	0.07	0	0	0	18	NA	GUT_GENOME143185	MGYG-HGUT-02446	d__Archaea;p__Methanobacteriota;c__Methanobacteria;o__Methanobacteriales;f__Methanobacteriaceae;g__Methanobrevibacter_A;s__Methanobrevibacter_A smithii_A	SRS820625	SRP052307	Peru	South America
GUT_GENOME172482	SRR1930253_bin.17	EBI	MAG	1171948	309	3880	31.24	63.16	0	0.49	0	0	0	18	NA	GUT_GENOME143185	MGYG-HGUT-02446	d__Archaea;p__Methanobacteriota;c__Methanobacteria;o__Methanobacteriales;f__Methanobacteriaceae;g__Methanobrevibacter_A;s__Methanobrevibacter_A smithii_A	SRS883067	SRP056480	Italy	Europe
GUT_GENOME174711	SRR2857686_bin.54	EBI	MAG	1766255	21	119043	31.07	100	0	0.02	0	99.8	51.84	20	NA	GUT_GENOME132205	MGYG-HGUT-02163	d__Archaea;p__Methanobacteriota;c__Methanobacteria;o__Methanobacteriales;f__Methanobacteriaceae;g__Methanobrevibacter_A;s__Methanobrevibacter_A smithii	SRS1135668	SRP065270	United States	North America
GUT_GENOME174811	SRR2857970_bin.75	EBI	MAG	1714615	28	86981	31.35	100	0	0.05	0	99.8	74.08	20	NA	GUT_GENOME132205	MGYG-HGUT-02163	d__Archaea;p__Methanobacteriota;c__Methanobacteria;o__Methanobacteriales;f__Methanobacteriaceae;g__Methanobrevibacter_A;s__Methanobrevibacter_A smithii	SRS1135724	SRP065270	United States	North America
GUT_GENOME174947	SRR2912780_bin.20	EBI	MAG	1776836	32	110521	31.06	100	0	0.02	0	0	32.94	20	NA	GUT_GENOME132205	MGYG-HGUT-02163	d__Archaea;p__Methanobacteriota;c__Methanobacteria;o__Methanobacteriales;f__Methanobacteriaceae;g__Methanobrevibacter_A;s__Methanobrevibacter_A smithii	SRS1158735	SRP066053	United States	North America
GUT_GENOME175078	SRR2912786_bin.24	EBI	MAG	802573	8	213255	31.48	53.6	0	0	0	0	0	15	NA	GUT_GENOME132205	MGYG-HGUT-02163	d__Archaea;p__Methanobacteriota;c__Methanobacteria;o__Methanobacteriales;f__Methanobacteriaceae;g__Methanobrevibacter_A;s__Methanobrevibacter_A smithii	SRS1158751	SRP066053	United States	North America
GUT_GENOME175196	SRR2912792_bin.24	EBI	MAG	1821071	21	109440	31.1	100	0	0.01	0	99.8	99.5	20	NA	GUT_GENOME132205	MGYG-HGUT-02163	d__Archaea;p__Methanobacteriota;c__Methanobacteria;o__Methanobacteriales;f__Methanobacteriaceae;g__Methanobrevibacter_A;s__Methanobrevibacter_A smithii	SRS1158746	SRP066053	United States	North America
GUT_GENOME175261	SRR2912796_bin.43	EBI	MAG	1765277	33	78783	30.92	100	0	0.01	0	0	0	20	NA	GUT_GENOME132205	MGYG-HGUT-02163	d__Archaea;p__Methanobacteriota;c__Methanobacteria;o__Methanobacteriales;f__Methanobacteriaceae;g__Methanobrevibacter_A;s__Methanobrevibacter_A smithii	SRS1158742	SRP066053	United States	North America
GUT_GENOME176050	SRR2992900_bin.32	EBI	MAG	1426937	223	8027	60.26	86.74	0.13	0.24	86.55	99.8	32.71	18	NA	GUT_GENOME251929	MGYG-HGUT-03962	d__Archaea;p__Thermoplasmatota;c__Thermoplasmata;o__Methanomassiliicoccales;f__Methanomethylophilaceae;g__UBA71;s__	SRS1205288	SRP067325	United States	North America
GUT_GENOME178294	SRR341670_bin.30	EBI	MAG	1760725	67	40621	31.21	100	0	0.01	0	0	0	20	NA	GUT_GENOME132205	MGYG-HGUT-02163	d__Archaea;p__Methanobacteriota;c__Methanobacteria;o__Methanobacteriales;f__Methanobacteriaceae;g__Methanobrevibacter_A;s__Methanobrevibacter_A smithii	SRS259523	SRP008047	China	Asia
GUT_GENOME183496	SRR4305530_bin.1	EBI	MAG	1809110	178	15798	31.51	98.8	0	0.01	0	99.8	99.5	19	NA	GUT_GENOME132205	MGYG-HGUT-02163	d__Archaea;p__Methanobacteriota;c__Methanobacteria;o__Methanobacteriales;f__Methanobacteriaceae;g__Methanobrevibacter_A;s__Methanobrevibacter_A smithii	SRS1719583	SRP090628	Russia	Europe
GUT_GENOME185225	SRR4444766_bin.4	EBI	MAG	1568791	446	3678	32.54	60.92	1.73	0.65	0	99.8	99.5	17	NA	GUT_GENOME132205	MGYG-HGUT-02163	d__Archaea;p__Methanobacteriota;c__Methanobacteria;o__Methanobacteriales;f__Methanobacteriaceae;g__Methanobrevibacter_A;s__Methanobrevibacter_A smithii	SRS1756244	SRP091570	United States	North America
GUT_GENOME186215	SRR4481774_bin.110	EBI	MAG	1453616	31	74854	30.85	91.2	0	0.01	0	0	0	18	NA	GUT_GENOME143185	MGYG-HGUT-02446	d__Archaea;p__Methanobacteriota;c__Methanobacteria;o__Methanobacteriales;f__Methanobacteriaceae;g__Methanobrevibacter_A;s__Methanobrevibacter_A smithii_A	SRS1767352	SRP091570	United States	North America
GUT_GENOME186227	SRR4481774_bin.41	EBI	MAG	1267633	298	4599	28.18	69.73	2	2.16	0	0	0	9	NA	GUT_GENOME132206	MGYG-HGUT-02164	d__Archaea;p__Methanobacteriota;c__Methanobacteria;o__Methanobacteriales;f__Methanobacteriaceae;g__Methanosphaera;s__Methanosphaera stadtmanae	SRS1767352	SRP091570	United States	North America
GUT_GENOME186511	SRR4783406_bin.117	EBI	MAG	1269612	23	76743	30.75	70.4	0	0.02	0	0	0	18	NA	GUT_GENOME143185	MGYG-HGUT-02446	d__Archaea;p__Methanobacteriota;c__Methanobacteria;o__Methanobacteriales;f__Methanobacteriaceae;g__Methanobrevibacter_A;s__Methanobrevibacter_A smithii_A	SRS1771176	SRP091570	United States	North America
GUT_GENOME186606	SRR4783415_bin.61	EBI	MAG	1927088	55	52780	30.32	100	0	0.02	0	0	0	20	NA	GUT_GENOME143185	MGYG-HGUT-02446	d__Archaea;p__Methanobacteriota;c__Methanobacteria;o__Methanobacteriales;f__Methanobacteriaceae;g__Methanobrevibacter_A;s__Methanobrevibacter_A smithii_A	SRS1771175	SRP091570	United States	North America
GUT_GENOME186770	SRR4783448_bin.90	EBI	MAG	1164307	35	57331	29.81	50.4	0	0.02	0	0	0	8	NA	GUT_GENOME143185	MGYG-HGUT-02446	d__Archaea;p__Methanobacteriota;c__Methanobacteria;o__Methanobacteriales;f__Methanobacteriaceae;g__Methanobrevibacter_A;s__Methanobrevibacter_A smithii_A	SRS1767346	SRP091570	United States	North America
GUT_GENOME186805	SRR4783461_bin.29	EBI	MAG	1776625	55	41460	30.48	96	0	0.02	0	0	0	20	NA	GUT_GENOME143185	MGYG-HGUT-02446	d__Archaea;p__Methanobacteriota;c__Methanobacteria;o__Methanobacteriales;f__Methanobacteriaceae;g__Methanobrevibacter_A;s__Methanobrevibacter_A smithii_A	SRS1771184	SRP091570	United States	North America
GUT_GENOME186901	SRR4783502_bin.12	EBI	MAG	1649877	210	10252	30.57	94.8	0.8	0.15	0	0	0	19	NA	GUT_GENOME143185	MGYG-HGUT-02446	d__Archaea;p__Methanobacteriota;c__Methanobacteria;o__Methanobacteriales;f__Methanobacteriaceae;g__Methanobrevibacter_A;s__Methanobrevibacter_A smithii_A	SRS1771188	SRP091570	United States	North America
GUT_GENOME187666	SRR5032288_bin.51	EBI	MAG	1874428	19	158095	59.67	97.98	0	0.02	86.55	99.8	99.16	20	NA	GUT_GENOME251929	MGYG-HGUT-03962	d__Archaea;p__Thermoplasmatota;c__Thermoplasmata;o__Methanomassiliicoccales;f__Methanomethylophilaceae;g__UBA71;s__	SRS1806033	SRP093506	China	Asia
GUT_GENOME188437	SRR5056644_bin.109	EBI	MAG	1772129	16	170860	31	100	0	0	0	0	0	20	NA	GUT_GENOME132205	MGYG-HGUT-02163	d__Archaea;p__Methanobacteriota;c__Methanobacteria;o__Methanobacteriales;f__Methanobacteriaceae;g__Methanobrevibacter_A;s__Methanobrevibacter_A smithii	SRS1820192	SRP093965	United States	North America
GUT_GENOME188488	SRR5056646_bin.80	EBI	MAG	1760094	55	51535	31.05	100	0	0.01	0	0	0	20	NA	GUT_GENOME132205	MGYG-HGUT-02163	d__Archaea;p__Methanobacteriota;c__Methanobacteria;o__Methanobacteriales;f__Methanobacteriaceae;g__Methanobrevibacter_A;s__Methanobrevibacter_A smithii	SRS1820194	SRP093965	United States	North America
GUT_GENOME188548	SRR5056649_bin.63	EBI	MAG	1283843	271	5216	32.13	82	0.8	0.11	0	0	0	18	NA	GUT_GENOME132205	MGYG-HGUT-02163	d__Archaea;p__Methanobacteriota;c__Methanobacteria;o__Methanobacteriales;f__Methanobacteriaceae;g__Methanobrevibacter_A;s__Methanobrevibacter_A smithii	SRS1820197	SRP093965	United States	North America
GUT_GENOME188589	SRR5056652_bin.117	EBI	MAG	1732540	75	40999	31.16	100	0	0.01	0	0	0	20	NA	GUT_GENOME132205	MGYG-HGUT-02163	d__Archaea;p__Methanobacteriota;c__Methanobacteria;o__Methanobacteriales;f__Methanobacteriaceae;g__Methanobrevibacter_A;s__Methanobrevibacter_A smithii	SRS1820200	SRP093965	United States	North America
GUT_GENOME188626	SRR5056653_bin.4	EBI	MAG	1782598	36	105517	31.1	100	0.8	0.13	0	21.06	10.7	20	NA	GUT_GENOME132205	MGYG-HGUT-02163	d__Archaea;p__Methanobacteriota;c__Methanobacteria;o__Methanobacteriales;f__Methanobacteriaceae;g__Methanobrevibacter_A;s__Methanobrevibacter_A smithii	SRS1820201	SRP093965	United States	North America
GUT_GENOME188682	SRR5056660_bin.82	EBI	MAG	1457388	208	9172	31.16	92.8	1.97	0.57	0	0	0	19	NA	GUT_GENOME143185	MGYG-HGUT-02446	d__Archaea;p__Methanobacteriota;c__Methanobacteria;o__Methanobacteriales;f__Methanobacteriaceae;g__Methanobrevibacter_A;s__Methanobrevibacter_A smithii_A	SRS1820208	SRP093965	United States	North America
GUT_GENOME188797	SRR5056665_bin.36	EBI	MAG	979248	16	104488	30.69	50.4	0	0.02	0	0	0	13	NA	GUT_GENOME132205	MGYG-HGUT-02163	d__Archaea;p__Methanobacteriota;c__Methanobacteria;o__Methanobacteriales;f__Methanobacteriaceae;g__Methanobrevibacter_A;s__Methanobrevibacter_A smithii	SRS1820213	SRP093965	United States	North America
GUT_GENOME188848	SRR5056668_bin.102	EBI	MAG	1755022	43	59367	30.44	96.8	0.8	0.15	0	0	0	20	NA	GUT_GENOME143185	MGYG-HGUT-02446	d__Archaea;p__Methanobacteriota;c__Methanobacteria;o__Methanobacteriales;f__Methanobacteriaceae;g__Methanobrevibacter_A;s__Methanobrevibacter_A smithii_A	SRS1820216	SRP093965	United States	North America
GUT_GENOME188920	SRR5056673_bin.83	EBI	MAG	1848178	23	115380	30.44	100	0	0.16	0	0	0	20	NA	GUT_GENOME143185	MGYG-HGUT-02446	d__Archaea;p__Methanobacteriota;c__Methanobacteria;o__Methanobacteriales;f__Methanobacteriaceae;g__Methanobrevibacter_A;s__Methanobrevibacter_A smithii_A	SRS1820221	SRP093965	United States	North America
GUT_GENOME188959	SRR5056681_bin.87	EBI	MAG	1745898	69	52249	31.28	97.2	0	0.21	0	99.8	99.5	19	NA	GUT_GENOME132205	MGYG-HGUT-02163	d__Archaea;p__Methanobacteriota;c__Methanobacteria;o__Methanobacteriales;f__Methanobacteriaceae;g__Methanobrevibacter_A;s__Methanobrevibacter_A smithii	SRS1820229	SRP093965	United States	North America
GUT_GENOME189093	SRR5056689_bin.56	EBI	MAG	1698725	145	17869	31.12	98	0.4	0.08	0	0	0	20	NA	GUT_GENOME132205	MGYG-HGUT-02163	d__Archaea;p__Methanobacteriota;c__Methanobacteria;o__Methanobacteriales;f__Methanobacteriaceae;g__Methanobrevibacter_A;s__Methanobrevibacter_A smithii	SRS1820237	SRP093965	United States	North America
GUT_GENOME189151	SRR5056693_bin.48	EBI	MAG	1753510	31	81983	31.02	100	0	0.01	0	0	0	20	NA	GUT_GENOME132205	MGYG-HGUT-02163	d__Archaea;p__Methanobacteriota;c__Methanobacteria;o__Methanobacteriales;f__Methanobacteriaceae;g__Methanobrevibacter_A;s__Methanobrevibacter_A smithii	SRS1820241	SRP093965	United States	North America
GUT_GENOME189651	SRR5056739_bin.47	EBI	MAG	1764583	42	61558	31.05	100	0	0.03	0	0	0	20	NA	GUT_GENOME132205	MGYG-HGUT-02163	d__Archaea;p__Methanobacteriota;c__Methanobacteria;o__Methanobacteriales;f__Methanobacteriaceae;g__Methanobrevibacter_A;s__Methanobrevibacter_A smithii	SRS1820284	SRP093965	United States	North America
GUT_GENOME189860	SRR5056756_bin.103	EBI	MAG	1821529	118	32769	31.11	100	0.8	0.04	0	99.8	99.5	20	NA	GUT_GENOME132205	MGYG-HGUT-02163	d__Archaea;p__Methanobacteriota;c__Methanobacteria;o__Methanobacteriales;f__Methanobacteriaceae;g__Methanobrevibacter_A;s__Methanobrevibacter_A smithii	SRS1820298	SRP093965	United States	North America
GUT_GENOME190261	SRR5056786_bin.74	EBI	MAG	1807214	118	24945	31.11	97.2	0	0.53	0	99.8	99.5	19	NA	GUT_GENOME132205	MGYG-HGUT-02163	d__Archaea;p__Methanobacteriota;c__Methanobacteria;o__Methanobacteriales;f__Methanobacteriaceae;g__Methanobrevibacter_A;s__Methanobrevibacter_A smithii	SRS1820323	SRP093965	United States	North America
GUT_GENOME190363	SRR5056792_bin.48	EBI	MAG	1767378	112	24981	31.31	99.2	1.6	0.21	0	99.8	99.5	19	NA	GUT_GENOME132205	MGYG-HGUT-02163	d__Archaea;p__Methanobacteriota;c__Methanobacteria;o__Methanobacteriales;f__Methanobacteriaceae;g__Methanobrevibacter_A;s__Methanobrevibacter_A smithii	SRS1820328	SRP093965	United States	North America
GUT_GENOME190483	SRR5056797_bin.96	EBI	MAG	1142146	15	131777	30.74	55.2	0	0.01	0	0	4.88	13	NA	GUT_GENOME132205	MGYG-HGUT-02163	d__Archaea;p__Methanobacteriota;c__Methanobacteria;o__Methanobacteriales;f__Methanobacteriaceae;g__Methanobrevibacter_A;s__Methanobrevibacter_A smithii	SRS1820333	SRP093965	United States	North America
GUT_GENOME190491	SRR5056801_bin.25	EBI	MAG	1802322	56	63884	30.44	100	3.2	0.5	0	0	0	20	NA	GUT_GENOME143185	MGYG-HGUT-02446	d__Archaea;p__Methanobacteriota;c__Methanobacteria;o__Methanobacteriales;f__Methanobacteriaceae;g__Methanobrevibacter_A;s__Methanobrevibacter_A smithii_A	SRS1820336	SRP093965	United States	North America
GUT_GENOME190707	SRR5056817_bin.67	EBI	MAG	1256941	297	4618	31.66	78.86	0.27	0.18	0	99.8	99.5	17	NA	GUT_GENOME132205	MGYG-HGUT-02163	d__Archaea;p__Methanobacteriota;c__Methanobacteria;o__Methanobacteriales;f__Methanobacteriaceae;g__Methanobrevibacter_A;s__Methanobrevibacter_A smithii	SRS1820340	SRP093965	United States	North America
GUT_GENOME190723	SRR5056818_bin.118	EBI	MAG	1723753	26	89792	31.18	100	0	0.01	0	0	0	20	NA	GUT_GENOME132205	MGYG-HGUT-02163	d__Archaea;p__Methanobacteriota;c__Methanobacteria;o__Methanobacteriales;f__Methanobacteriaceae;g__Methanobrevibacter_A;s__Methanobrevibacter_A smithii	SRS1820350	SRP093965	United States	North America
GUT_GENOME190786	SRR5056819_bin.79	EBI	MAG	1731088	8	293335	31.15	100	0	0.01	0	99.8	99.5	20	NA	GUT_GENOME132205	MGYG-HGUT-02163	d__Archaea;p__Methanobacteriota;c__Methanobacteria;o__Methanobacteriales;f__Methanobacteriaceae;g__Methanobrevibacter_A;s__Methanobrevibacter_A smithii	SRS1820232	SRP093965	United States	North America
GUT_GENOME190906	SRR5056827_bin.37	EBI	MAG	1916518	29	105098	30.34	100	0	0.12	0	99.8	99.5	20	NA	GUT_GENOME143185	MGYG-HGUT-02446	d__Archaea;p__Methanobacteriota;c__Methanobacteria;o__Methanobacteriales;f__Methanobacteriaceae;g__Methanobrevibacter_A;s__Methanobrevibacter_A smithii_A	SRS1820356	SRP093965	United States	North America
GUT_GENOME191095	SRR5056841_bin.23	EBI	MAG	1724639	12	187663	31.14	100	0	0.02	0	99.8	68.13	20	NA	GUT_GENOME132205	MGYG-HGUT-02163	d__Archaea;p__Methanobacteriota;c__Methanobacteria;o__Methanobacteriales;f__Methanobacteriaceae;g__Methanobrevibacter_A;s__Methanobrevibacter_A smithii	SRS1820368	SRP093965	United States	North America
GUT_GENOME191129	SRR5056843_bin.14	EBI	MAG	1262713	307	4281	31.39	74.25	0.06	NA	0	0	0	17	NA	GUT_GENOME132205	MGYG-HGUT-02163	d__Archaea;p__Methanobacteriota;c__Methanobacteria;o__Methanobacteriales;f__Methanobacteriaceae;g__Methanobrevibacter_A;s__Methanobrevibacter_A smithii	SRS1820369	SRP093965	United States	North America
GUT_GENOME191229	SRR5056846_bin.81	EBI	MAG	1308639	21	96375	30.96	64	0	0.15	0	0	0	14	NA	GUT_GENOME132205	MGYG-HGUT-02163	d__Archaea;p__Methanobacteriota;c__Methanobacteria;o__Methanobacteriales;f__Methanobacteriaceae;g__Methanobrevibacter_A;s__Methanobrevibacter_A smithii	SRS1820374	SRP093965	United States	North America
GUT_GENOME191425	SRR5056859_bin.49	EBI	MAG	1674641	15	135437	30.67	98.4	0	0.02	0	0	0	20	NA	GUT_GENOME143185	MGYG-HGUT-02446	d__Archaea;p__Methanobacteriota;c__Methanobacteria;o__Methanobacteriales;f__Methanobacteriaceae;g__Methanobrevibacter_A;s__Methanobrevibacter_A smithii_A	SRS1820385	SRP093965	United States	North America
GUT_GENOME191472	SRR5056860_bin.93	EBI	MAG	1723207	11	220390	31.05	100	0	0.01	0	0	0	20	NA	GUT_GENOME132205	MGYG-HGUT-02163	d__Archaea;p__Methanobacteriota;c__Methanobacteria;o__Methanobacteriales;f__Methanobacteriaceae;g__Methanobrevibacter_A;s__Methanobrevibacter_A smithii	SRS1820386	SRP093965	United States	North America
GUT_GENOME191649	SRR5056873_bin.84	EBI	MAG	1826904	29	100353	31.03	100	0	0.15	0	0	0	20	NA	GUT_GENOME132205	MGYG-HGUT-02163	d__Archaea;p__Methanobacteriota;c__Methanobacteria;o__Methanobacteriales;f__Methanobacteriaceae;g__Methanobrevibacter_A;s__Methanobrevibacter_A smithii	SRS1820396	SRP093965	United States	North America
GUT_GENOME191667	SRR5056875_bin.110	EBI	MAG	1312520	282	5078	31.23	71.25	0.8	0	0	99.8	99.5	15	NA	GUT_GENOME132205	MGYG-HGUT-02163	d__Archaea;p__Methanobacteriota;c__Methanobacteria;o__Methanobacteriales;f__Methanobacteriaceae;g__Methanobrevibacter_A;s__Methanobrevibacter_A smithii	SRS1820263	SRP093965	United States	North America
GUT_GENOME191702	SRR5056880_bin.124	EBI	MAG	1747731	31	96612	31.17	100	0	0.05	0	99.8	68.13	20	NA	GUT_GENOME132205	MGYG-HGUT-02163	d__Archaea;p__Methanobacteriota;c__Methanobacteria;o__Methanobacteriales;f__Methanobacteriaceae;g__Methanobrevibacter_A;s__Methanobrevibacter_A smithii	SRS1820400	SRP093965	United States	North America
GUT_GENOME191771	SRR5056884_bin.11	EBI	MAG	1802235	19	135775	31.13	100	0	0.03	0	99.8	78.83	20	NA	GUT_GENOME132205	MGYG-HGUT-02163	d__Archaea;p__Methanobacteriota;c__Methanobacteria;o__Methanobacteriales;f__Methanobacteriaceae;g__Methanobrevibacter_A;s__Methanobrevibacter_A smithii	SRS1820404	SRP093965	United States	North America
GUT_GENOME191855	SRR5056887_bin.95	EBI	MAG	1772900	45	60665	30.47	100	0	0.54	0	0	0	20	NA	GUT_GENOME143185	MGYG-HGUT-02446	d__Archaea;p__Methanobacteriota;c__Methanobacteria;o__Methanobacteriales;f__Methanobacteriaceae;g__Methanobrevibacter_A;s__Methanobrevibacter_A smithii_A	SRS1820407	SRP093965	United States	North America
GUT_GENOME192000	SRR5056893_bin.28	EBI	MAG	1833389	28	136449	31.01	100	0	0.01	0	0	0	20	NA	GUT_GENOME132205	MGYG-HGUT-02163	d__Archaea;p__Methanobacteriota;c__Methanobacteria;o__Methanobacteriales;f__Methanobacteriaceae;g__Methanobrevibacter_A;s__Methanobrevibacter_A smithii	SRS1820411	SRP093965	United States	North America
GUT_GENOME192357	SRR5056917_bin.21	EBI	MAG	1289302	247	5984	32.4	87.38	1.6	0.08	0	0	0	14	NA	GUT_GENOME132205	MGYG-HGUT-02163	d__Archaea;p__Methanobacteriota;c__Methanobacteria;o__Methanobacteriales;f__Methanobacteriaceae;g__Methanobrevibacter_A;s__Methanobrevibacter_A smithii	SRS1820430	SRP093965	United States	North America
GUT_GENOME192495	SRR5056929_bin.48	EBI	MAG	1351969	13	135437	30.85	84.8	0	0.01	0	0	0	18	NA	GUT_GENOME143185	MGYG-HGUT-02446	d__Archaea;p__Methanobacteriota;c__Methanobacteria;o__Methanobacteriales;f__Methanobacteriaceae;g__Methanobrevibacter_A;s__Methanobrevibacter_A smithii_A	SRS1820439	SRP093965	United States	North America
GUT_GENOME192598	SRR5056934_bin.50	EBI	MAG	1620654	188	12920	31.04	91.64	0	0.18	0	0	0	18	NA	GUT_GENOME132205	MGYG-HGUT-02163	d__Archaea;p__Methanobacteriota;c__Methanobacteria;o__Methanobacteriales;f__Methanobacteriaceae;g__Methanobrevibacter_A;s__Methanobrevibacter_A smithii	SRS1820442	SRP093965	United States	North America
GUT_GENOME192768	SRR5056944_bin.53	EBI	MAG	1750122	22	111016	31.06	100	0	0.02	0	0	0	20	NA	GUT_GENOME132205	MGYG-HGUT-02163	d__Archaea;p__Methanobacteriota;c__Methanobacteria;o__Methanobacteriales;f__Methanobacteriaceae;g__Methanobrevibacter_A;s__Methanobrevibacter_A smithii	SRS1820449	SRP093965	United States	North America
GUT_GENOME192973	SRR5056961_bin.59	EBI	MAG	1220918	18	97265	31.45	82.4	0	0.02	0	0	0	17	NA	GUT_GENOME132205	MGYG-HGUT-02163	d__Archaea;p__Methanobacteriota;c__Methanobacteria;o__Methanobacteriales;f__Methanobacteriaceae;g__Methanobrevibacter_A;s__Methanobrevibacter_A smithii	SRS1820462	SRP093965	United States	North America
GUT_GENOME193092	SRR5056973_bin.8	EBI	MAG	1736874	97	30209	31.26	100	0	0.13	0	99.8	99.5	20	NA	GUT_GENOME132205	MGYG-HGUT-02163	d__Archaea;p__Methanobacteriota;c__Methanobacteria;o__Methanobacteriales;f__Methanobacteriaceae;g__Methanobrevibacter_A;s__Methanobrevibacter_A smithii	SRS1820470	SRP093965	United States	North America
GUT_GENOME193113	SRR5056975_bin.52	EBI	MAG	1419505	17	122988	30.98	70.4	0	0.13	0	99.8	99.5	16	NA	GUT_GENOME132205	MGYG-HGUT-02163	d__Archaea;p__Methanobacteriota;c__Methanobacteria;o__Methanobacteriales;f__Methanobacteriaceae;g__Methanobrevibacter_A;s__Methanobrevibacter_A smithii	SRS1820471	SRP093965	United States	North America
GUT_GENOME193229	SRR5056994_bin.92	EBI	MAG	1577270	84	35260	31.48	94.4	0	0.83	0	99.8	51.84	16	NA	GUT_GENOME132205	MGYG-HGUT-02163	d__Archaea;p__Methanobacteriota;c__Methanobacteria;o__Methanobacteriales;f__Methanobacteriaceae;g__Methanobrevibacter_A;s__Methanobrevibacter_A smithii	SRS1820481	SRP093965	United States	North America
GUT_GENOME193335	SRR5057015_bin.38	EBI	MAG	1770996	14	290493	31.01	100	0	0	0	0	0	20	NA	GUT_GENOME132205	MGYG-HGUT-02163	d__Archaea;p__Methanobacteriota;c__Methanobacteria;o__Methanobacteriales;f__Methanobacteriaceae;g__Methanobrevibacter_A;s__Methanobrevibacter_A smithii	SRS1820493	SRP093965	United States	North America
GUT_GENOME193466	SRR5057027_bin.66	EBI	MAG	1245709	334	4150	31.97	67.94	0.8	2.95	0	0	0	11	NA	GUT_GENOME132205	MGYG-HGUT-02163	d__Archaea;p__Methanobacteriota;c__Methanobacteria;o__Methanobacteriales;f__Methanobacteriaceae;g__Methanobrevibacter_A;s__Methanobrevibacter_A smithii	SRS1820451	SRP093965	United States	North America
GUT_GENOME193632	SRR5057037_bin.127	EBI	MAG	1442979	10	220827	31.31	93.6	0	0	0	0	0	19	NA	GUT_GENOME132205	MGYG-HGUT-02163	d__Archaea;p__Methanobacteriota;c__Methanobacteria;o__Methanobacteriales;f__Methanobacteriaceae;g__Methanobrevibacter_A;s__Methanobrevibacter_A smithii	SRS1820255	SRP093965	United States	North America
GUT_GENOME193668	SRR5057039_bin.24	EBI	MAG	737119	6	220827	31.73	51.2	0	0.01	0	0	0	16	NA	GUT_GENOME132205	MGYG-HGUT-02163	d__Archaea;p__Methanobacteriota;c__Methanobacteria;o__Methanobacteriales;f__Methanobacteriaceae;g__Methanobrevibacter_A;s__Methanobrevibacter_A smithii	SRS1820510	SRP093965	United States	North America
GUT_GENOME193846	SRR5057062_bin.92	EBI	MAG	1564927	205	9423	31.3	92.8	0.8	0.18	0	99.8	99.5	19	NA	GUT_GENOME132205	MGYG-HGUT-02163	d__Archaea;p__Methanobacteriota;c__Methanobacteria;o__Methanobacteriales;f__Methanobacteriaceae;g__Methanobrevibacter_A;s__Methanobrevibacter_A smithii	SRS1820526	SRP093965	United States	North America
GUT_GENOME193896	SRR5057067_bin.86	EBI	MAG	1731575	34	81881	31.2	100	0	0.1	0	0	99.5	20	NA	GUT_GENOME132205	MGYG-HGUT-02163	d__Archaea;p__Methanobacteriota;c__Methanobacteria;o__Methanobacteriales;f__Methanobacteriaceae;g__Methanobrevibacter_A;s__Methanobrevibacter_A smithii	SRS1820480	SRP093965	United States	North America
GUT_GENOME193975	SRR5057073_bin.2	EBI	MAG	1850072	33	92549	30.98	100	0	0.06	0	0	0	20	NA	GUT_GENOME132205	MGYG-HGUT-02163	d__Archaea;p__Methanobacteriota;c__Methanobacteria;o__Methanobacteriales;f__Methanobacteriaceae;g__Methanobrevibacter_A;s__Methanobrevibacter_A smithii	SRS1820532	SRP093965	United States	North America
GUT_GENOME194015	SRR5057076_bin.48	EBI	MAG	1156726	278	4521	31.76	65.91	0	1.14	0	0	0	13	NA	GUT_GENOME132205	MGYG-HGUT-02163	d__Archaea;p__Methanobacteriota;c__Methanobacteria;o__Methanobacteriales;f__Methanobacteriaceae;g__Methanobrevibacter_A;s__Methanobrevibacter_A smithii	SRS1820469	SRP093965	United States	North America
GUT_GENOME194071	SRR5057082_bin.9	EBI	MAG	1591297	143	15422	31.33	95.96	1.32	0.93	0	0	0	20	NA	GUT_GENOME132205	MGYG-HGUT-02163	d__Archaea;p__Methanobacteriota;c__Methanobacteria;o__Methanobacteriales;f__Methanobacteriaceae;g__Methanobrevibacter_A;s__Methanobrevibacter_A smithii	SRS1820534	SRP093965	United States	North America
GUT_GENOME194198	SRR5057090_bin.119	EBI	MAG	1732400	42	57063	31.22	100	0	0.13	0	0	0	20	NA	GUT_GENOME132205	MGYG-HGUT-02163	d__Archaea;p__Methanobacteriota;c__Methanobacteria;o__Methanobacteriales;f__Methanobacteriaceae;g__Methanobrevibacter_A;s__Methanobrevibacter_A smithii	SRS1820424	SRP093965	United States	North America
GUT_GENOME194277	SRR5057094_bin.53	EBI	MAG	1776683	22	111211	31.05	100	0.8	0.01	0	0	0	20	NA	GUT_GENOME132205	MGYG-HGUT-02163	d__Archaea;p__Methanobacteriota;c__Methanobacteria;o__Methanobacteriales;f__Methanobacteriaceae;g__Methanobrevibacter_A;s__Methanobrevibacter_A smithii	SRS1820542	SRP093965	United States	North America
GUT_GENOME194462	SRR5057111_bin.58	EBI	MAG	1697923	39	60741	31.23	100	0.8	0.01	0	0	0	20	NA	GUT_GENOME132205	MGYG-HGUT-02163	d__Archaea;p__Methanobacteriota;c__Methanobacteria;o__Methanobacteriales;f__Methanobacteriaceae;g__Methanobrevibacter_A;s__Methanobrevibacter_A smithii	SRS1820554	SRP093965	United States	North America
GUT_GENOME194601	SRR5057124_bin.29	EBI	MAG	1596396	218	9710	31.33	93.26	1.66	1.54	0	0	10.7	20	NA	GUT_GENOME132205	MGYG-HGUT-02163	d__Archaea;p__Methanobacteriota;c__Methanobacteria;o__Methanobacteriales;f__Methanobacteriaceae;g__Methanobrevibacter_A;s__Methanobrevibacter_A smithii	SRS1820377	SRP093965	United States	North America
GUT_GENOME195105	SRR5106282_bin.50	EBI	MAG	1486526	80	24071	56.22	93.49	2.42	0.04	87.39	0	3.91	20	NA	GUT_GENOME143252	MGYG-HGUT-02456	d__Archaea;p__Thermoplasmatota;c__Thermoplasmata;o__Methanomassiliicoccales;f__Methanomethylophilaceae;g__Methanomethylophilus;s__Methanomethylophilus alvus	SRS1858591	SRP095060	China	Asia
GUT_GENOME195804	SRR5127396_bin.23	EBI	MAG	1349216	339	4326	32.75	76.22	0	0.02	0	22.41	0	20	NA	GUT_GENOME132205	MGYG-HGUT-02163	d__Archaea;p__Methanobacteriota;c__Methanobacteria;o__Methanobacteriales;f__Methanobacteriaceae;g__Methanobrevibacter_A;s__Methanobrevibacter_A smithii	SRS1876263	SRP095580	Netherlands	Europe
GUT_GENOME196478	SRR5127498_bin.4	EBI	MAG	1238151	306	4362	32.17	79.32	0.4	0.02	0	0	99.06	18	NA	GUT_GENOME143185	MGYG-HGUT-02446	d__Archaea;p__Methanobacteriota;c__Methanobacteria;o__Methanobacteriales;f__Methanobacteriaceae;g__Methanobrevibacter_A;s__Methanobrevibacter_A smithii_A	SRS1876365	SRP095580	Netherlands	Europe
GUT_GENOME196523	SRR5127503_bin.21	EBI	MAG	1224490	342	3721	32.48	79.54	0	0.05	0	0	20.64	18	NA	GUT_GENOME132205	MGYG-HGUT-02163	d__Archaea;p__Methanobacteriota;c__Methanobacteria;o__Methanobacteriales;f__Methanobacteriaceae;g__Methanobrevibacter_A;s__Methanobrevibacter_A smithii	SRS1876370	SRP095580	Netherlands	Europe
GUT_GENOME196730	SRR5127550_bin.19	EBI	MAG	853179	254	3441	33.44	63.03	0	0.02	0	0	0	6	NA	GUT_GENOME132205	MGYG-HGUT-02163	d__Archaea;p__Methanobacteriota;c__Methanobacteria;o__Methanobacteriales;f__Methanobacteriaceae;g__Methanobrevibacter_A;s__Methanobrevibacter_A smithii	SRS1876417	SRP095580	Netherlands	Europe
GUT_GENOME196888	SRR5127582_bin.5	EBI	MAG	1489973	278	6399	32.5	90.18	0	0.01	0	0	0	13	NA	GUT_GENOME132205	MGYG-HGUT-02163	d__Archaea;p__Methanobacteriota;c__Methanobacteria;o__Methanobacteriales;f__Methanobacteriaceae;g__Methanobrevibacter_A;s__Methanobrevibacter_A smithii	SRS1876449	SRP095580	Netherlands	Europe
GUT_GENOME196993	SRR5127610_bin.1	EBI	MAG	1136483	303	4106	33.09	74.21	0	0.01	0	0	0	10	NA	GUT_GENOME132205	MGYG-HGUT-02163	d__Archaea;p__Methanobacteriota;c__Methanobacteria;o__Methanobacteriales;f__Methanobacteriaceae;g__Methanobrevibacter_A;s__Methanobrevibacter_A smithii	SRS1876477	SRP095580	Netherlands	Europe
GUT_GENOME197537	SRR5127709_bin.21	EBI	MAG	1293198	273	5409	32.43	87.99	0	0.03	0	0	0	13	NA	GUT_GENOME132205	MGYG-HGUT-02163	d__Archaea;p__Methanobacteriota;c__Methanobacteria;o__Methanobacteriales;f__Methanobacteriaceae;g__Methanobrevibacter_A;s__Methanobrevibacter_A smithii	SRS1876576	SRP095580	Netherlands	Europe
GUT_GENOME197579	SRR5127714_bin.15	EBI	MAG	1143149	285	4342	32.52	72.07	0	0.03	0	0	0	9	NA	GUT_GENOME143185	MGYG-HGUT-02446	d__Archaea;p__Methanobacteriota;c__Methanobacteria;o__Methanobacteriales;f__Methanobacteriaceae;g__Methanobrevibacter_A;s__Methanobrevibacter_A smithii_A	SRS1876581	SRP095580	Netherlands	Europe
GUT_GENOME198687	SRR5275413_bin.67	EBI	MAG	1795939	67	44620	31.29	100	0	0.02	0	0	0	20	NA	GUT_GENOME132205	MGYG-HGUT-02163	d__Archaea;p__Methanobacteriota;c__Methanobacteria;o__Methanobacteriales;f__Methanobacteriaceae;g__Methanobrevibacter_A;s__Methanobrevibacter_A smithii	SRS1993545	SRP100446	United States	North America
GUT_GENOME198706	SRR5275415_bin.17	EBI	MAG	1654417	14	139855	31.34	100	0	0	0	0	0	20	NA	GUT_GENOME132205	MGYG-HGUT-02163	d__Archaea;p__Methanobacteriota;c__Methanobacteria;o__Methanobacteriales;f__Methanobacteriaceae;g__Methanobrevibacter_A;s__Methanobrevibacter_A smithii	SRS1993547	SRP100446	United States	North America
GUT_GENOME199246	SRR5275462_bin.36	EBI	MAG	1627292	317	6049	31.37	92.89	2.8	0.06	0	0	0	17	NA	GUT_GENOME132205	MGYG-HGUT-02163	d__Archaea;p__Methanobacteriota;c__Methanobacteria;o__Methanobacteriales;f__Methanobacteriaceae;g__Methanobrevibacter_A;s__Methanobrevibacter_A smithii	SRS1993590	SRP100446	United States	North America
GUT_GENOME199396	SRR5275476_bin.22	EBI	MAG	1488200	227	8382	31.7	91.33	0.04	0.04	0	0	0	19	NA	GUT_GENOME132205	MGYG-HGUT-02163	d__Archaea;p__Methanobacteriota;c__Methanobacteria;o__Methanobacteriales;f__Methanobacteriaceae;g__Methanobrevibacter_A;s__Methanobrevibacter_A smithii	SRS1994024	SRP100446	United States	North America
GUT_GENOME199450	SRR5275480_bin.53	EBI	MAG	1765161	29	106653	31.04	100	0	0.01	0	23.36	0	20	NA	GUT_GENOME132205	MGYG-HGUT-02163	d__Archaea;p__Methanobacteriota;c__Methanobacteria;o__Methanobacteriales;f__Methanobacteriaceae;g__Methanobrevibacter_A;s__Methanobrevibacter_A smithii	SRS1994027	SRP100446	United States	North America
GUT_GENOME199661	SRR5279227_bin.16	EBI	MAG	1696839	138	17129	59.86	95.56	0	0	87.39	37.64	97.99	20	NA	GUT_GENOME251929	MGYG-HGUT-03962	d__Archaea;p__Thermoplasmatota;c__Thermoplasmata;o__Methanomassiliicoccales;f__Methanomethylophilaceae;g__UBA71;s__	SRS1997006	SRP100575	China	Asia
GUT_GENOME201195	SRR5558037_bin.86	EBI	MAG	950979	216	4819	32.21	61.07	0.04	NA	0	99.8	99.5	14	NA	GUT_GENOME132205	MGYG-HGUT-02163	d__Archaea;p__Methanobacteriota;c__Methanobacteria;o__Methanobacteriales;f__Methanobacteriaceae;g__Methanobrevibacter_A;s__Methanobrevibacter_A smithii	SRS1996016	SRP100518	Spain	Europe
GUT_GENOME201907	SRR5558101_bin.49	EBI	MAG	990329	220	4942	56.95	66.85	0.06	0	87.39	0	0	16	NA	GUT_GENOME143252	MGYG-HGUT-02456	d__Archaea;p__Thermoplasmatota;c__Thermoplasmata;o__Methanomassiliicoccales;f__Methanomethylophilaceae;g__Methanomethylophilus;s__Methanomethylophilus alvus	SRS1996016	SRP100518	Spain	Europe
GUT_GENOME201908	SRR5558101_bin.53	EBI	MAG	1630748	162	14898	31.37	96.53	1.07	0.53	0	64.59	99.5	20	NA	GUT_GENOME132205	MGYG-HGUT-02163	d__Archaea;p__Methanobacteriota;c__Methanobacteria;o__Methanobacteriales;f__Methanobacteriaceae;g__Methanobrevibacter_A;s__Methanobrevibacter_A smithii	SRS1996016	SRP100518	Spain	Europe
GUT_GENOME201980	SRR5558107_bin.137	EBI	MAG	1302345	217	7331	56.57	86.16	0	0	87.39	99.8	0	19	NA	GUT_GENOME143252	MGYG-HGUT-02456	d__Archaea;p__Thermoplasmatota;c__Thermoplasmata;o__Methanomassiliicoccales;f__Methanomethylophilaceae;g__Methanomethylophilus;s__Methanomethylophilus alvus	SRS1996016	SRP100518	Spain	Europe
GUT_GENOME201990	SRR5558107_bin.30	EBI	MAG	1606483	65	31759	31.32	97.6	0.8	0	0	22.68	0	19	NA	GUT_GENOME132205	MGYG-HGUT-02163	d__Archaea;p__Methanobacteriota;c__Methanobacteria;o__Methanobacteriales;f__Methanobacteriaceae;g__Methanobrevibacter_A;s__Methanobrevibacter_A smithii	SRS1996016	SRP100518	Spain	Europe
GUT_GENOME202024	SRR5558108_bin.109	EBI	MAG	892112	210	4456	56.91	63.07	0.81	0	0	0	0	17	NA	GUT_GENOME143252	MGYG-HGUT-02456	d__Archaea;p__Thermoplasmatota;c__Thermoplasmata;o__Methanomassiliicoccales;f__Methanomethylophilaceae;g__Methanomethylophilus;s__Methanomethylophilus alvus	SRS1996016	SRP100518	Spain	Europe
GUT_GENOME202032	SRR5558108_bin.24	EBI	MAG	1573591	155	14750	31.48	92.53	0	0	0	99.8	86.49	16	NA	GUT_GENOME132205	MGYG-HGUT-02163	d__Archaea;p__Methanobacteriota;c__Methanobacteria;o__Methanobacteriales;f__Methanobacteriaceae;g__Methanobrevibacter_A;s__Methanobrevibacter_A smithii	SRS1996016	SRP100518	Spain	Europe
GUT_GENOME203551	SRR5558249_bin.18	EBI	MAG	1707673	148	17119	31.09	95.42	0.8	0.44	0	0	12.44	19	NA	GUT_GENOME132205	MGYG-HGUT-02163	d__Archaea;p__Methanobacteriota;c__Methanobacteria;o__Methanobacteriales;f__Methanobacteriaceae;g__Methanobrevibacter_A;s__Methanobrevibacter_A smithii	SRS1996016	SRP100518	Spain	Europe
GUT_GENOME205216	SRR5579955_bin.108	EBI	MAG	1165967	125	13154	32.07	79.6	2.18	1.27	0	99.8	99.5	19	NA	GUT_GENOME132205	MGYG-HGUT-02163	d__Archaea;p__Methanobacteriota;c__Methanobacteria;o__Methanobacteriales;f__Methanobacteriaceae;g__Methanobrevibacter_A;s__Methanobrevibacter_A smithii	SRS1996016	SRP100518	Spain	Europe
GUT_GENOME205222	SRR5579955_bin.24	EBI	MAG	991057	215	5003	56.98	69.12	2.42	3.41	0	0	0	15	NA	GUT_GENOME143252	MGYG-HGUT-02456	d__Archaea;p__Thermoplasmatota;c__Thermoplasmata;o__Methanomassiliicoccales;f__Methanomethylophilaceae;g__Methanomethylophilus;s__Methanomethylophilus alvus	SRS1996016	SRP100518	Spain	Europe
GUT_GENOME205482	SRR5579977_bin.69	EBI	MAG	1846536	32	104032	31	100	0.8	0.03	0	0	0	20	NA	GUT_GENOME132205	MGYG-HGUT-02163	d__Archaea;p__Methanobacteriota;c__Methanobacteria;o__Methanobacteriales;f__Methanobacteriaceae;g__Methanobrevibacter_A;s__Methanobrevibacter_A smithii	SRS1996016	SRP100518	Spain	Europe
GUT_GENOME205503	SRR5579978_bin.47	EBI	MAG	1758959	21	105675	31.11	100	0	0	0	0	0	20	NA	GUT_GENOME132205	MGYG-HGUT-02163	d__Archaea;p__Methanobacteriota;c__Methanobacteria;o__Methanobacteriales;f__Methanobacteriaceae;g__Methanobrevibacter_A;s__Methanobrevibacter_A smithii	SRS1996016	SRP100518	Spain	Europe
GUT_GENOME205550	SRR5579979_bin.63	EBI	MAG	1810263	20	161083	31.02	100	0	0.02	0	0	0	20	NA	GUT_GENOME132205	MGYG-HGUT-02163	d__Archaea;p__Methanobacteriota;c__Methanobacteria;o__Methanobacteriales;f__Methanobacteriaceae;g__Methanobrevibacter_A;s__Methanobrevibacter_A smithii	SRS1996016	SRP100518	Spain	Europe
GUT_GENOME205598	SRR5579980_bin.79	EBI	MAG	1859197	33	104033	31.05	100	0	0.11	0	0	0	20	NA	GUT_GENOME132205	MGYG-HGUT-02163	d__Archaea;p__Methanobacteriota;c__Methanobacteria;o__Methanobacteriales;f__Methanobacteriaceae;g__Methanobrevibacter_A;s__Methanobrevibacter_A smithii	SRS1996016	SRP100518	Spain	Europe
GUT_GENOME205625	SRR5579983_bin.23	EBI	MAG	1829877	28	108480	31.04	100	0	0.02	0	0	0	20	NA	GUT_GENOME132205	MGYG-HGUT-02163	d__Archaea;p__Methanobacteriota;c__Methanobacteria;o__Methanobacteriales;f__Methanobacteriaceae;g__Methanobrevibacter_A;s__Methanobrevibacter_A smithii	SRS1996016	SRP100518	Spain	Europe
GUT_GENOME205681	SRR5579986_bin.33	EBI	MAG	1664022	54	62428	31.22	98.4	1.6	0.25	0	13.27	99.5	20	NA	GUT_GENOME132205	MGYG-HGUT-02163	d__Archaea;p__Methanobacteriota;c__Methanobacteria;o__Methanobacteriales;f__Methanobacteriaceae;g__Methanobrevibacter_A;s__Methanobrevibacter_A smithii	SRS1996016	SRP100518	Spain	Europe
GUT_GENOME205751	SRR5579995_bin.16	EBI	MAG	1836520	26	117653	31.04	100	0	0.03	0	0	0	20	NA	GUT_GENOME132205	MGYG-HGUT-02163	d__Archaea;p__Methanobacteriota;c__Methanobacteria;o__Methanobacteriales;f__Methanobacteriaceae;g__Methanobrevibacter_A;s__Methanobrevibacter_A smithii	SRS1996016	SRP100518	Spain	Europe
GUT_GENOME206035	SRR5580035_bin.30	EBI	MAG	1753139	22	116026	31.08	100	0	0.01	0	0	0	20	NA	GUT_GENOME132205	MGYG-HGUT-02163	d__Archaea;p__Methanobacteriota;c__Methanobacteria;o__Methanobacteriales;f__Methanobacteriaceae;g__Methanobrevibacter_A;s__Methanobrevibacter_A smithii	SRS1996016	SRP100518	Spain	Europe
GUT_GENOME206091	SRR5580036_bin.47	EBI	MAG	1745410	37	76909	31.08	100	0.8	0.02	0	0	0	20	NA	GUT_GENOME132205	MGYG-HGUT-02163	d__Archaea;p__Methanobacteriota;c__Methanobacteria;o__Methanobacteriales;f__Methanobacteriaceae;g__Methanobrevibacter_A;s__Methanobrevibacter_A smithii	SRS1996016	SRP100518	Spain	Europe
GUT_GENOME206112	SRR5580037_bin.21	EBI	MAG	1171024	286	4310	31.32	70.32	1.89	1.37	0	0	0	15	NA	GUT_GENOME132205	MGYG-HGUT-02163	d__Archaea;p__Methanobacteriota;c__Methanobacteria;o__Methanobacteriales;f__Methanobacteriaceae;g__Methanobrevibacter_A;s__Methanobrevibacter_A smithii	SRS1996016	SRP100518	Spain	Europe
GUT_GENOME206223	SRR5580042_bin.60	EBI	MAG	1836972	27	121540	31.02	100	0	0.04	0	0	0	20	NA	GUT_GENOME132205	MGYG-HGUT-02163	d__Archaea;p__Methanobacteriota;c__Methanobacteria;o__Methanobacteriales;f__Methanobacteriaceae;g__Methanobrevibacter_A;s__Methanobrevibacter_A smithii	SRS1996016	SRP100518	Spain	Europe
GUT_GENOME206720	SRR5580103_bin.54	EBI	MAG	1600592	18	154058	31.43	99.2	0	0.01	0	0	0	20	NA	GUT_GENOME132205	MGYG-HGUT-02163	d__Archaea;p__Methanobacteriota;c__Methanobacteria;o__Methanobacteriales;f__Methanobacteriaceae;g__Methanobrevibacter_A;s__Methanobrevibacter_A smithii	SRS1996016	SRP100518	Spain	Europe
GUT_GENOME206725	SRR5580103_bin.62	EBI	MAG	1826407	151	17028	58.18	91.94	0.81	0.72	86.55	99.8	0	19	NA	GUT_GENOME268463	MGYG-HGUT-04339	d__Archaea;p__Thermoplasmatota;c__Thermoplasmata;o__Methanomassiliicoccales;f__Methanomethylophilaceae;g__UBA71;s__	SRS1996016	SRP100518	Spain	Europe
GUT_GENOME206907	SRR5580124_bin.10	EBI	MAG	1163956	288	4337	31.46	73.96	0.04	NA	0	0	11	13	NA	GUT_GENOME132205	MGYG-HGUT-02163	d__Archaea;p__Methanobacteriota;c__Methanobacteria;o__Methanobacteriales;f__Methanobacteriaceae;g__Methanobrevibacter_A;s__Methanobrevibacter_A smithii	SRS1996016	SRP100518	Spain	Europe
GUT_GENOME207005	SRR585697_bin.44	EBI	MAG	1726136	23	140054	31.18	100	0	0	0	0	0	20	NA	GUT_GENOME132205	MGYG-HGUT-02163	d__Archaea;p__Methanobacteriota;c__Methanobacteria;o__Methanobacteriales;f__Methanobacteriaceae;g__Methanobrevibacter_A;s__Methanobrevibacter_A smithii	SRS367799	SRP016067	Sweden	Europe
GUT_GENOME207107	SRR585753_bin.1	EBI	MAG	1829816	138	22063	31.05	97.33	0	0.04	0	40.56	0	20	NA	GUT_GENOME132205	MGYG-HGUT-02163	d__Archaea;p__Methanobacteriota;c__Methanobacteria;o__Methanobacteriales;f__Methanobacteriaceae;g__Methanobrevibacter_A;s__Methanobrevibacter_A smithii	SRS367853	SRP016067	Sweden	Europe
GUT_GENOME207131	SRR585755_bin.31	EBI	MAG	1791569	36	100927	31.08	100	0	0.02	0	99.8	99.5	20	NA	GUT_GENOME132205	MGYG-HGUT-02163	d__Archaea;p__Methanobacteriota;c__Methanobacteria;o__Methanobacteriales;f__Methanobacteriaceae;g__Methanobrevibacter_A;s__Methanobrevibacter_A smithii	SRS367855	SRP016067	Sweden	Europe
GUT_GENOME207148	SRR585756_bin.9	EBI	MAG	1701302	152	15265	31.25	95.96	0	0	0	0	0	20	NA	GUT_GENOME132205	MGYG-HGUT-02163	d__Archaea;p__Methanobacteriota;c__Methanobacteria;o__Methanobacteriales;f__Methanobacteriaceae;g__Methanobrevibacter_A;s__Methanobrevibacter_A smithii	SRS367856	SRP016067	Sweden	Europe
GUT_GENOME207198	SRR585781_bin.6	EBI	MAG	1443478	65	32631	31.37	90	0	0.57	0	62.97	36.32	17	NA	GUT_GENOME132205	MGYG-HGUT-02163	d__Archaea;p__Methanobacteriota;c__Methanobacteria;o__Methanobacteriales;f__Methanobacteriaceae;g__Methanobrevibacter_A;s__Methanobrevibacter_A smithii	SRS367864	SRP016067	Sweden	Europe
GUT_GENOME211208	SRR6028644_bin.11	EBI	MAG	1104086	302	3818	32.97	72.87	0.89	0.11	0	0	0	9	NA	GUT_GENOME132205	MGYG-HGUT-02163	d__Archaea;p__Methanobacteriota;c__Methanobacteria;o__Methanobacteriales;f__Methanobacteriaceae;g__Methanobrevibacter_A;s__Methanobrevibacter_A smithii	SRS1905800	SRP096283	United States	North America
GUT_GENOME211450	SRR6054438_bin.2	EBI	MAG	1180890	227	5797	56.55	82.11	0	0	87.39	0	13.78	19	NA	GUT_GENOME143252	MGYG-HGUT-02456	d__Archaea;p__Thermoplasmatota;c__Thermoplasmata;o__Methanomassiliicoccales;f__Methanomethylophilaceae;g__Methanomethylophilus;s__Methanomethylophilus alvus	SRS1914215	SRP096283	United States	North America
GUT_GENOME212521	SRR769515_bin.33	EBI	MAG	1473007	353	4635	31.47	77.49	0	0.16	0	0	99.5	11	NA	GUT_GENOME143185	MGYG-HGUT-02446	d__Archaea;p__Methanobacteriota;c__Methanobacteria;o__Methanobacteriales;f__Methanobacteriaceae;g__Methanobrevibacter_A;s__Methanobrevibacter_A smithii_A	SRS399327	SRP019038	United States	North America
GUT_GENOME213510	SRS014235_15	HGM	MAG	1360296	574	2674	30.79	75.42	1.6	NA	0	0	9.67	13	NA	GUT_GENOME143185	MGYG-HGUT-02446	d__Archaea;p__Methanobacteriota;c__Methanobacteria;o__Methanobacteriales;f__Methanobacteriaceae;g__Methanobrevibacter_A;s__Methanobrevibacter_A smithii_A	SRS014235	SRP175119	United States	North America
GUT_GENOME213656	SRS014923_23	HGM	MAG	1640283	138	35383	31.5	89.6	3.2	1.14	0	0	0	20	NA	GUT_GENOME132205	MGYG-HGUT-02163	d__Archaea;p__Methanobacteriota;c__Methanobacteria;o__Methanobacteriales;f__Methanobacteriaceae;g__Methanobrevibacter_A;s__Methanobrevibacter_A smithii	SRS014923	SRP002163	United States	North America
GUT_GENOME213693	SRS014979_31	HGM	MAG	1671739	279	8321	31.1	93.33	1.2	0	0	49.09	0	19	NA	GUT_GENOME132205	MGYG-HGUT-02163	d__Archaea;p__Methanobacteriota;c__Methanobacteria;o__Methanobacteriales;f__Methanobacteriaceae;g__Methanobrevibacter_A;s__Methanobrevibacter_A smithii	SRS014979	SRP175119	United States	North America
GUT_GENOME215821	SRS048870_50	HGM	MAG	1618031	27	109352	41.49	94.76	0	0.02	92.44	99.86	99.03	19	NA	GUT_GENOME132202	MGYG-HGUT-02160	d__Archaea;p__Thermoplasmatota;c__Thermoplasmata;o__Methanomassiliicoccales;f__Methanomassiliicoccaceae;g__Methanomassiliicoccus_A;s__Methanomassiliicoccus_A intestinalis	SRS048870	SRP002163	United States	North America
GUT_GENOME216790	SRS065504_65	HGM	MAG	1355459	236	8053	41.39	83.43	0.81	0	0	56.87	99.06	18	NA	GUT_GENOME132202	MGYG-HGUT-02160	d__Archaea;p__Thermoplasmatota;c__Thermoplasmata;o__Methanomassiliicoccales;f__Methanomassiliicoccaceae;g__Methanomassiliicoccus_A;s__Methanomassiliicoccus_A intestinalis	SRS065504	SRP175119	United States	North America
GUT_GENOME217904	SRS104400_81	HGM	MAG	866438	492	1823	32.92	57.81	0	0	0	0	0	7	NA	GUT_GENOME132205	MGYG-HGUT-02163	d__Archaea;p__Methanobacteriota;c__Methanobacteria;o__Methanobacteriales;f__Methanobacteriaceae;g__Methanobrevibacter_A;s__Methanobrevibacter_A smithii	SRS104400	SRP002163	United States	North America
GUT_GENOME218203	SRS1170743_1	HGM	MAG	1210444	430	3152	32.87	72.14	0	0.05	0	0	0	18	NA	GUT_GENOME132205	MGYG-HGUT-02163	d__Archaea;p__Methanobacteriota;c__Methanobacteria;o__Methanobacteriales;f__Methanobacteriaceae;g__Methanobrevibacter_A;s__Methanobrevibacter_A smithii	SRS1170743	SRP066479	El Salvador	South America
GUT_GENOME218272	SRS1170755_13	HGM	MAG	1306040	409	3840	32.61	77.98	0.4	0.07	0	0	0	19	NA	GUT_GENOME132205	MGYG-HGUT-02163	d__Archaea;p__Methanobacteriota;c__Methanobacteria;o__Methanobacteriales;f__Methanobacteriaceae;g__Methanobrevibacter_A;s__Methanobrevibacter_A smithii	SRS1170755	SRP066479	El Salvador	South America
GUT_GENOME218688	SRS1170840_93	HGM	MAG	1426914	503	3433	32.57	86.37	0	0.01	0	0	0	18	NA	GUT_GENOME132205	MGYG-HGUT-02163	d__Archaea;p__Methanobacteriota;c__Methanobacteria;o__Methanobacteriales;f__Methanobacteriaceae;g__Methanobrevibacter_A;s__Methanobrevibacter_A smithii	SRS1170840	SRP066479	Peru	South America
GUT_GENOME218694	SRS1170841_21	HGM	MAG	1439517	372	4774	32.23	85.67	0	0	0	0	0	15	NA	GUT_GENOME132205	MGYG-HGUT-02163	d__Archaea;p__Methanobacteriota;c__Methanobacteria;o__Methanobacteriales;f__Methanobacteriaceae;g__Methanobrevibacter_A;s__Methanobrevibacter_A smithii	SRS1170841	SRP066479	Peru	South America
GUT_GENOME218725	SRS1170842_51	HGM	MAG	1471928	462	3860	32.28	86.31	0	0.04	0	0	0	12	NA	GUT_GENOME132205	MGYG-HGUT-02163	d__Archaea;p__Methanobacteriota;c__Methanobacteria;o__Methanobacteriales;f__Methanobacteriaceae;g__Methanobrevibacter_A;s__Methanobrevibacter_A smithii	SRS1170842	SRP066479	Peru	South America
GUT_GENOME218743	SRS1170845_18	HGM	MAG	1593627	292	7151	31.85	89.57	0	0.01	0	0	0	20	NA	GUT_GENOME132205	MGYG-HGUT-02163	d__Archaea;p__Methanobacteriota;c__Methanobacteria;o__Methanobacteriales;f__Methanobacteriaceae;g__Methanobrevibacter_A;s__Methanobrevibacter_A smithii	SRS1170845	SRP066479	Peru	South America
GUT_GENOME219891	SRS1596774_110	HGM	MAG	1403709	68	59117	56.3	91.13	1.21	0.02	87.39	99.8	99.13	18	NA	GUT_GENOME143252	MGYG-HGUT-02456	d__Archaea;p__Thermoplasmatota;c__Thermoplasmata;o__Methanomassiliicoccales;f__Methanomethylophilaceae;g__Methanomethylophilus;s__Methanomethylophilus alvus	SRS1596774	SRP080787	China	Asia
GUT_GENOME222248	SRS1596867_136	HGM	MAG	1325621	45	59314	56.35	90.32	0.81	0.01	87.39	99.8	99.13	18	NA	GUT_GENOME143252	MGYG-HGUT-02456	d__Archaea;p__Thermoplasmatota;c__Thermoplasmata;o__Methanomassiliicoccales;f__Methanomethylophilaceae;g__Methanomethylophilus;s__Methanomethylophilus alvus	SRS1596867	SRP080787	Mongolia	Asia
GUT_GENOME224400	SRS1719583_4	HGM	MAG	1545694	223	8032	31.77	94	0	0.01	0	99.8	99.5	18	NA	GUT_GENOME132205	MGYG-HGUT-02163	d__Archaea;p__Methanobacteriota;c__Methanobacteria;o__Methanobacteriales;f__Methanobacteriaceae;g__Methanobrevibacter_A;s__Methanobrevibacter_A smithii	SRS1719583	SRP090628	Russia	Europe
GUT_GENOME225751	SRS2320630_1	HGM	MAG	1080799	534	2133	31.99	71.15	2.8	0.03	0	0	0	8	NA	GUT_GENOME132205	MGYG-HGUT-02163	d__Archaea;p__Methanobacteriota;c__Methanobacteria;o__Methanobacteriales;f__Methanobacteriaceae;g__Methanobrevibacter_A;s__Methanobrevibacter_A smithii	SRS2320630	SRP110665	United Republic of Tanzania	Africa
GUT_GENOME225754	SRS2320631_5	HGM	MAG	1182675	589	2151	31.51	66.88	0	0.03	0	0	0	5	NA	GUT_GENOME132205	MGYG-HGUT-02163	d__Archaea;p__Methanobacteriota;c__Methanobacteria;o__Methanobacteriales;f__Methanobacteriaceae;g__Methanobrevibacter_A;s__Methanobrevibacter_A smithii	SRS2320631	SRP110665	United Republic of Tanzania	Africa
GUT_GENOME225756	SRS2320634_3	HGM	MAG	1318049	461	3407	32.01	76.94	0	0.01	0	0	0	12	NA	GUT_GENOME132205	MGYG-HGUT-02163	d__Archaea;p__Methanobacteriota;c__Methanobacteria;o__Methanobacteriales;f__Methanobacteriaceae;g__Methanobrevibacter_A;s__Methanobrevibacter_A smithii	SRS2320634	SRP110665	United Republic of Tanzania	Africa
GUT_GENOME225771	SRS2320650_1	HGM	MAG	1724070	897	1942	33.15	69.05	1.6	0.1	0	0	0	8	NA	GUT_GENOME132205	MGYG-HGUT-02163	d__Archaea;p__Methanobacteriota;c__Methanobacteria;o__Methanobacteriales;f__Methanobacteriaceae;g__Methanobrevibacter_A;s__Methanobrevibacter_A smithii	SRS2320650	SRP110665	United Republic of Tanzania	Africa
GUT_GENOME226819	SRS259523_51	HGM	MAG	1662822	75	34753	31.35	98.44	0	0	0	0	0	20	NA	GUT_GENOME132205	MGYG-HGUT-02163	d__Archaea;p__Methanobacteriota;c__Methanobacteria;o__Methanobacteriales;f__Methanobacteriaceae;g__Methanobrevibacter_A;s__Methanobrevibacter_A smithii	SRS259523	SRP008047	China	Asia
GUT_GENOME228085	SRS294841_15	HGM	MAG	1413859	481	3606	32.06	85.33	2	0.14	0	0	0	15	NA	GUT_GENOME132205	MGYG-HGUT-02163	d__Archaea;p__Methanobacteriota;c__Methanobacteria;o__Methanobacteriales;f__Methanobacteriaceae;g__Methanobrevibacter_A;s__Methanobrevibacter_A smithii	SRS294841	SRP008047	China	Asia
GUT_GENOME228796	SRS294888_15	HGM	MAG	1432256	415	4414	31.92	88.2	0.04	0.23	0	0	0	18	NA	GUT_GENOME132205	MGYG-HGUT-02163	d__Archaea;p__Methanobacteriota;c__Methanobacteria;o__Methanobacteriales;f__Methanobacteriaceae;g__Methanobrevibacter_A;s__Methanobrevibacter_A smithii	SRS294888	SRP008047	China	Asia
GUT_GENOME229163	SRS294912_76	HGM	MAG	1437407	384	4902	31.81	91.33	0	0.14	0	0	0	18	NA	GUT_GENOME132205	MGYG-HGUT-02163	d__Archaea;p__Methanobacteriota;c__Methanobacteria;o__Methanobacteriales;f__Methanobacteriaceae;g__Methanobrevibacter_A;s__Methanobrevibacter_A smithii	SRS294912	SRP008047	China	Asia
GUT_GENOME229353	SRS294925_36	HGM	MAG	1412956	427	4175	31.89	79.2	0.8	0.06	0	0	0	12	NA	GUT_GENOME132205	MGYG-HGUT-02163	d__Archaea;p__Methanobacteriota;c__Methanobacteria;o__Methanobacteriales;f__Methanobacteriaceae;g__Methanobrevibacter_A;s__Methanobrevibacter_A smithii	SRS294925	SRP008047	China	Asia
GUT_GENOME229578	SRS294937_2	HGM	MAG	1676391	46	55973	31.51	99.2	0	0	0	99.8	99.5	20	NA	GUT_GENOME132205	MGYG-HGUT-02163	d__Archaea;p__Methanobacteriota;c__Methanobacteria;o__Methanobacteriales;f__Methanobacteriaceae;g__Methanobrevibacter_A;s__Methanobrevibacter_A smithii	SRS294937	SRP008047	China	Asia
GUT_GENOME230112	SRS294970_51	HGM	MAG	1930720	209	12481	31.97	94	0	0.01	0	0	99.5	20	NA	GUT_GENOME132205	MGYG-HGUT-02163	d__Archaea;p__Methanobacteriota;c__Methanobacteria;o__Methanobacteriales;f__Methanobacteriaceae;g__Methanobrevibacter_A;s__Methanobrevibacter_A smithii	SRS294970	SRP008047	China	Asia
GUT_GENOME230547	SRS294995_53	HGM	MAG	848022	467	1856	32.78	59.76	0	NA	0	0	0	3	NA	GUT_GENOME132205	MGYG-HGUT-02163	d__Archaea;p__Methanobacteriota;c__Methanobacteria;o__Methanobacteriales;f__Methanobacteriaceae;g__Methanobrevibacter_A;s__Methanobrevibacter_A smithii	SRS294995	SRP008047	China	Asia
GUT_GENOME230857	SRS295010_27	HGM	MAG	1786766	55	60712	31.13	100	0	0	0	0	0	20	NA	GUT_GENOME132205	MGYG-HGUT-02163	d__Archaea;p__Methanobacteriota;c__Methanobacteria;o__Methanobacteriales;f__Methanobacteriaceae;g__Methanobrevibacter_A;s__Methanobrevibacter_A smithii	SRS295010	SRP008047	China	Asia
GUT_GENOME232377	SRS475534_115	HGM	MAG	1364848	152	14512	31.72	91.02	1.07	NA	0	0	0	19	NA	GUT_GENOME132205	MGYG-HGUT-02163	d__Archaea;p__Methanobacteriota;c__Methanobacteria;o__Methanobacteriales;f__Methanobacteriaceae;g__Methanobrevibacter_A;s__Methanobrevibacter_A smithii	SRS475534	SRP029441	Fiji	Oceania
GUT_GENOME232448	SRS475537_88	HGM	MAG	1443775	167	11485	58.22	84.27	0.81	NA	86.55	0	0	19	NA	GUT_GENOME268463	MGYG-HGUT-04339	d__Archaea;p__Thermoplasmatota;c__Thermoplasmata;o__Methanomassiliicoccales;f__Methanomethylophilaceae;g__UBA71;s__	SRS475537	SRP029441	Fiji	Oceania
GUT_GENOME232707	SRS475566_49	HGM	MAG	1744829	43	98839	31.23	99.2	0	NA	0	0	0	20	NA	GUT_GENOME132205	MGYG-HGUT-02163	d__Archaea;p__Methanobacteriota;c__Methanobacteria;o__Methanobacteriales;f__Methanobacteriaceae;g__Methanobrevibacter_A;s__Methanobrevibacter_A smithii	SRS475566	SRP029441	Fiji	Oceania
GUT_GENOME232847	SRS475582_12	HGM	MAG	1199510	400	3576	46.93	81.64	4.84	NA	93.28	99.8	99.5	19	NA	GUT_GENOME237836	MGYG-HGUT-03602	d__Archaea;p__Halobacteriota;c__Methanomicrobia;o__Methanomicrobiales;f__Methanocorpusculaceae;g__Methanocorpusculum;s__	SRS475582	SRP029441	Fiji	Oceania
GUT_GENOME232921	SRS475589_67	HGM	MAG	2151595	127	24220	32.65	97.6	0	NA	0	8.6	0	19	NA	GUT_GENOME014311	MGYG-HGUT-00522	d__Archaea;p__Methanobacteriota;c__Methanobacteria;o__Methanobacteriales;f__Methanobacteriaceae;g__Methanobrevibacter_A;s__	SRS475589	SRP029441	Fiji	Oceania
GUT_GENOME233274	SRS475647_50	HGM	MAG	1297155	662	2050	56.72	79.27	4.19	NA	88.24	0	0	16	NA	GUT_GENOME236887	MGYG-HGUT-03531	d__Archaea;p__Thermoplasmatota;c__Thermoplasmata;o__Methanomassiliicoccales;f__Methanomethylophilaceae;g__ISO4-G1;s__	SRS475647	SRP029441	Fiji	Oceania
GUT_GENOME233332	SRS475651_76	HGM	MAG	893493	452	2095	32.26	57.62	0.4	NA	0	0	0	18	NA	GUT_GENOME132205	MGYG-HGUT-02163	d__Archaea;p__Methanobacteriota;c__Methanobacteria;o__Methanobacteriales;f__Methanobacteriaceae;g__Methanobrevibacter_A;s__Methanobrevibacter_A smithii	SRS475651	SRP029441	Fiji	Oceania
GUT_GENOME233586	SRS475684_9	HGM	MAG	1281738	421	3670	31.75	85.75	0.8	NA	0	0	0	16	NA	GUT_GENOME132205	MGYG-HGUT-02163	d__Archaea;p__Methanobacteriota;c__Methanobacteria;o__Methanobacteriales;f__Methanobacteriaceae;g__Methanobrevibacter_A;s__Methanobrevibacter_A smithii	SRS475684	SRP029441	Fiji	Oceania
GUT_GENOME233748	SRS475698_82	HGM	MAG	1205418	540	2469	59.54	76.25	0.93	NA	0	0	0	15	NA	GUT_GENOME268463	MGYG-HGUT-04339	d__Archaea;p__Thermoplasmatota;c__Thermoplasmata;o__Methanomassiliicoccales;f__Methanomethylophilaceae;g__UBA71;s__	SRS475698	SRP029441	Fiji	Oceania
GUT_GENOME233869	SRS475709_74	HGM	MAG	1262709	422	3592	31.92	76.47	4.16	NA	0	99.8	0	14	NA	GUT_GENOME132205	MGYG-HGUT-02163	d__Archaea;p__Methanobacteriota;c__Methanobacteria;o__Methanobacteriales;f__Methanobacteriaceae;g__Methanobrevibacter_A;s__Methanobrevibacter_A smithii	SRS475709	SRP029441	Fiji	Oceania
GUT_GENOME234013	SRS475929_55	HGM	MAG	1623683	52	49452	31.31	93.6	0	NA	0	0	0	16	NA	GUT_GENOME132205	MGYG-HGUT-02163	d__Archaea;p__Methanobacteriota;c__Methanobacteria;o__Methanobacteriales;f__Methanobacteriaceae;g__Methanobrevibacter_A;s__Methanobrevibacter_A smithii	SRS475929	SRP029441	Fiji	Oceania
GUT_GENOME234038	SRS475931_19	HGM	MAG	1371977	132	15649	31.48	87.2	2.52	NA	0	0	0	19	NA	GUT_GENOME132205	MGYG-HGUT-02163	d__Archaea;p__Methanobacteriota;c__Methanobacteria;o__Methanobacteriales;f__Methanobacteriaceae;g__Methanobrevibacter_A;s__Methanobrevibacter_A smithii	SRS475931	SRP029441	Fiji	Oceania
GUT_GENOME234074	SRS475933_105	HGM	MAG	1195157	450	3106	31.86	72.84	0.58	NA	0	0	0	15	NA	GUT_GENOME132205	MGYG-HGUT-02163	d__Archaea;p__Methanobacteriota;c__Methanobacteria;o__Methanobacteriales;f__Methanobacteriaceae;g__Methanobrevibacter_A;s__Methanobrevibacter_A smithii	SRS475933	SRP029441	Fiji	Oceania
GUT_GENOME234285	SRS475968_132	HGM	MAG	1211845	369	3731	28.08	73.82	1.2	NA	0	0	0	4	NA	GUT_GENOME132206	MGYG-HGUT-02164	d__Archaea;p__Methanobacteriota;c__Methanobacteria;o__Methanobacteriales;f__Methanobacteriaceae;g__Methanosphaera;s__Methanosphaera stadtmanae	SRS475968	SRP029441	Fiji	Oceania
GUT_GENOME234300	SRS475968_18	HGM	MAG	1729608	31	114999	31.14	98.4	1.6	NA	0	0	0	20	NA	GUT_GENOME132205	MGYG-HGUT-02163	d__Archaea;p__Methanobacteriota;c__Methanobacteria;o__Methanobacteriales;f__Methanobacteriaceae;g__Methanobrevibacter_A;s__Methanobrevibacter_A smithii	SRS475968	SRP029441	Fiji	Oceania
GUT_GENOME234367	SRS475979_104	HGM	MAG	1279371	183	10834	31.58	85.47	0	NA	0	99.8	99.5	19	NA	GUT_GENOME132205	MGYG-HGUT-02163	d__Archaea;p__Methanobacteriota;c__Methanobacteria;o__Methanobacteriales;f__Methanobacteriaceae;g__Methanobrevibacter_A;s__Methanobrevibacter_A smithii	SRS475979	SRP029441	Fiji	Oceania
GUT_GENOME234397	SRS475979_79	HGM	MAG	1231980	169	8547	56.05	89.46	0.04	NA	86.55	99.8	9.53	19	NA	GUT_GENOME234397	MGYG-HGUT-03455	d__Archaea;p__Thermoplasmatota;c__Thermoplasmata;o__Methanomassiliicoccales;f__Methanomethylophilaceae;g__UBA71;s__	SRS475979	SRP029441	Fiji	Oceania
GUT_GENOME234446	SRS475981_18	HGM	MAG	1500114	264	6585	58.79	85.89	1.27	NA	0	0	0	17	NA	GUT_GENOME268463	MGYG-HGUT-04339	d__Archaea;p__Thermoplasmatota;c__Thermoplasmata;o__Methanomassiliicoccales;f__Methanomethylophilaceae;g__UBA71;s__	SRS475981	SRP029441	Fiji	Oceania
GUT_GENOME234555	SRS475986_86	HGM	MAG	1143317	488	2629	31.73	76.53	0.06	NA	0	0	0	14	NA	GUT_GENOME132205	MGYG-HGUT-02163	d__Archaea;p__Methanobacteriota;c__Methanobacteria;o__Methanobacteriales;f__Methanobacteriaceae;g__Methanobrevibacter_A;s__Methanobrevibacter_A smithii	SRS475986	SRP029441	Fiji	Oceania
GUT_GENOME234566	SRS475987_11	HGM	MAG	1161192	423	2951	31.94	70.44	2.53	NA	0	0	18.73	8	NA	GUT_GENOME132205	MGYG-HGUT-02163	d__Archaea;p__Methanobacteriota;c__Methanobacteria;o__Methanobacteriales;f__Methanobacteriaceae;g__Methanobrevibacter_A;s__Methanobrevibacter_A smithii	SRS475987	SRP029441	Fiji	Oceania
GUT_GENOME234683	SRS475990_94	HGM	MAG	1276199	617	2284	58.57	73.45	2.06	NA	86.55	0	0	17	NA	GUT_GENOME268463	MGYG-HGUT-04339	d__Archaea;p__Thermoplasmatota;c__Thermoplasmata;o__Methanomassiliicoccales;f__Methanomethylophilaceae;g__UBA71;s__	SRS475990	SRP029441	Fiji	Oceania
GUT_GENOME234851	SRS476014_24	HGM	MAG	1605093	135	17347	58.01	85.08	0.81	NA	86.55	99.8	99.13	19	NA	GUT_GENOME268463	MGYG-HGUT-04339	d__Archaea;p__Thermoplasmatota;c__Thermoplasmata;o__Methanomassiliicoccales;f__Methanomethylophilaceae;g__UBA71;s__	SRS476014	SRP029441	Fiji	Oceania
GUT_GENOME235078	SRS476035_106	HGM	MAG	1598827	29	97362	31.46	96.8	0	NA	0	0	0	20	NA	GUT_GENOME132205	MGYG-HGUT-02163	d__Archaea;p__Methanobacteriota;c__Methanobacteria;o__Methanobacteriales;f__Methanobacteriaceae;g__Methanobrevibacter_A;s__Methanobrevibacter_A smithii	SRS476035	SRP029441	Fiji	Oceania
GUT_GENOME235093	SRS476035_1	HGM	MAG	1526860	309	5200	58.33	78.63	2.08	2.29	80.67	0	0	15	NA	GUT_GENOME268463	MGYG-HGUT-04339	d__Archaea;p__Thermoplasmatota;c__Thermoplasmata;o__Methanomassiliicoccales;f__Methanomethylophilaceae;g__UBA71;s__	SRS476035	SRP029441	Fiji	Oceania
GUT_GENOME235165	SRS476050_2	HGM	MAG	1382313	633	2366	58.38	77.61	0.97	NA	86.55	0	99.13	17	NA	GUT_GENOME268463	MGYG-HGUT-04339	d__Archaea;p__Thermoplasmatota;c__Thermoplasmata;o__Methanomassiliicoccales;f__Methanomethylophilaceae;g__UBA71;s__	SRS476050	SRP029441	Fiji	Oceania
GUT_GENOME235230	SRS476058_55	HGM	MAG	1728742	35	84662	31.14	100	0	NA	0	0	0	20	NA	GUT_GENOME132205	MGYG-HGUT-02163	d__Archaea;p__Methanobacteriota;c__Methanobacteria;o__Methanobacteriales;f__Methanobacteriaceae;g__Methanobrevibacter_A;s__Methanobrevibacter_A smithii	SRS476058	SRP029441	Fiji	Oceania
GUT_GENOME235270	SRS476070_151	HGM	MAG	1295305	604	2297	59.15	73.46	2.42	NA	86.55	99.8	0	17	NA	GUT_GENOME268463	MGYG-HGUT-04339	d__Archaea;p__Thermoplasmatota;c__Thermoplasmata;o__Methanomassiliicoccales;f__Methanomethylophilaceae;g__UBA71;s__	SRS476070	SRP029441	Fiji	Oceania
GUT_GENOME235276	SRS476070_177	HGM	MAG	1541416	196	11555	31.51	98.37	0	NA	0	0	0	20	NA	GUT_GENOME132205	MGYG-HGUT-02163	d__Archaea;p__Methanobacteriota;c__Methanobacteria;o__Methanobacteriales;f__Methanobacteriaceae;g__Methanobrevibacter_A;s__Methanobrevibacter_A smithii	SRS476070	SRP029441	Fiji	Oceania
GUT_GENOME235324	SRS476076_103	HGM	MAG	1714079	23	142884	31.15	100	0	NA	0	56.87	0	20	NA	GUT_GENOME132205	MGYG-HGUT-02163	d__Archaea;p__Methanobacteriota;c__Methanobacteria;o__Methanobacteriales;f__Methanobacteriaceae;g__Methanobrevibacter_A;s__Methanobrevibacter_A smithii	SRS476076	SRP029441	Fiji	Oceania
GUT_GENOME235514	SRS476094_66	HGM	MAG	1568313	151	15470	58.29	84.62	0	NA	86.55	99.8	0	19	NA	GUT_GENOME268463	MGYG-HGUT-04339	d__Archaea;p__Thermoplasmatota;c__Thermoplasmata;o__Methanomassiliicoccales;f__Methanomethylophilaceae;g__UBA71;s__	SRS476094	SRP029441	Fiji	Oceania
GUT_GENOME235622	SRS476098_31	HGM	MAG	1623291	51	45078	31.36	95.2	0	NA	0	0	0	19	NA	GUT_GENOME132205	MGYG-HGUT-02163	d__Archaea;p__Methanobacteriota;c__Methanobacteria;o__Methanobacteriales;f__Methanobacteriaceae;g__Methanobrevibacter_A;s__Methanobrevibacter_A smithii	SRS476098	SRP029441	Fiji	Oceania
GUT_GENOME235641	SRS476098_6	HGM	MAG	1783350	271	9955	58	89.11	2.42	0.71	86.55	0	0	18	NA	GUT_GENOME268463	MGYG-HGUT-04339	d__Archaea;p__Thermoplasmatota;c__Thermoplasmata;o__Methanomassiliicoccales;f__Methanomethylophilaceae;g__UBA71;s__	SRS476098	SRP029441	Fiji	Oceania
GUT_GENOME235755	SRS476104_113	HGM	MAG	1521626	292	6804	31.64	90.4	0	NA	0	0	0	16	NA	GUT_GENOME132205	MGYG-HGUT-02163	d__Archaea;p__Methanobacteriota;c__Methanobacteria;o__Methanobacteriales;f__Methanobacteriaceae;g__Methanobrevibacter_A;s__Methanobrevibacter_A smithii	SRS476104	SRP029441	Fiji	Oceania
GUT_GENOME235871	SRS476120_105	HGM	MAG	1523423	252	8673	31.58	92.27	1.64	NA	0	0	0	20	NA	GUT_GENOME132205	MGYG-HGUT-02163	d__Archaea;p__Methanobacteriota;c__Methanobacteria;o__Methanobacteriales;f__Methanobacteriaceae;g__Methanobrevibacter_A;s__Methanobrevibacter_A smithii	SRS476120	SRP029441	Fiji	Oceania
GUT_GENOME236041	SRS476139_57	HGM	MAG	1477485	429	4112	31.5	87.95	4.8	NA	0	0	0	19	NA	GUT_GENOME132205	MGYG-HGUT-02163	d__Archaea;p__Methanobacteriota;c__Methanobacteria;o__Methanobacteriales;f__Methanobacteriaceae;g__Methanobrevibacter_A;s__Methanobrevibacter_A smithii	SRS476139	SRP029441	Fiji	Oceania
GUT_GENOME236126	SRS476144_101	HGM	MAG	1380488	285	6051	27.74	88.94	1.12	NA	0	0	15.08	14	NA	GUT_GENOME132206	MGYG-HGUT-02164	d__Archaea;p__Methanobacteriota;c__Methanobacteria;o__Methanobacteriales;f__Methanobacteriaceae;g__Methanosphaera;s__Methanosphaera stadtmanae	SRS476144	SRP029441	Fiji	Oceania
GUT_GENOME236144	SRS476144_14	HGM	MAG	1742822	33	93359	31.28	100	0	NA	0	0	0	20	NA	GUT_GENOME132205	MGYG-HGUT-02163	d__Archaea;p__Methanobacteriota;c__Methanobacteria;o__Methanobacteriales;f__Methanobacteriaceae;g__Methanobrevibacter_A;s__Methanobrevibacter_A smithii	SRS476144	SRP029441	Fiji	Oceania
GUT_GENOME236183	SRS476144_87	HGM	MAG	1717061	139	19641	57.72	90.26	0.81	NA	86.55	0	0	18	NA	GUT_GENOME268463	MGYG-HGUT-04339	d__Archaea;p__Thermoplasmatota;c__Thermoplasmata;o__Methanomassiliicoccales;f__Methanomethylophilaceae;g__UBA71;s__	SRS476144	SRP029441	Fiji	Oceania
GUT_GENOME236296	SRS476155_10	HGM	MAG	1471961	112	17557	58.06	86.29	0.81	NA	86.55	0	0	20	NA	GUT_GENOME268463	MGYG-HGUT-04339	d__Archaea;p__Thermoplasmatota;c__Thermoplasmata;o__Methanomassiliicoccales;f__Methanomethylophilaceae;g__UBA71;s__	SRS476155	SRP029441	Fiji	Oceania
GUT_GENOME236297	SRS476155_111	HGM	MAG	1384788	415	3956	31.59	86.48	0	NA	0	0	0	18	NA	GUT_GENOME132205	MGYG-HGUT-02163	d__Archaea;p__Methanobacteriota;c__Methanobacteria;o__Methanobacteriales;f__Methanobacteriaceae;g__Methanobrevibacter_A;s__Methanobrevibacter_A smithii	SRS476155	SRP029441	Fiji	Oceania
GUT_GENOME236436	SRS476164_6	HGM	MAG	1118648	573	2157	56.33	81.4	3.23	NA	0	0	0	12	NA	GUT_GENOME234397	MGYG-HGUT-03455	d__Archaea;p__Thermoplasmatota;c__Thermoplasmata;o__Methanomassiliicoccales;f__Methanomethylophilaceae;g__UBA71;s__	SRS476164	SRP029441	Fiji	Oceania
GUT_GENOME236539	SRS476169_69	HGM	MAG	1192169	636	1951	58.15	66.09	1.61	NA	86.55	99.8	99.13	18	NA	GUT_GENOME268463	MGYG-HGUT-04339	d__Archaea;p__Thermoplasmatota;c__Thermoplasmata;o__Methanomassiliicoccales;f__Methanomethylophilaceae;g__UBA71;s__	SRS476169	SRP029441	Fiji	Oceania
GUT_GENOME236682	SRS476185_9	HGM	MAG	1645229	20	110872	31.49	99.2	0	NA	0	0	99.5	20	NA	GUT_GENOME132205	MGYG-HGUT-02163	d__Archaea;p__Methanobacteriota;c__Methanobacteria;o__Methanobacteriales;f__Methanobacteriaceae;g__Methanobrevibacter_A;s__Methanobrevibacter_A smithii	SRS476185	SRP029441	Fiji	Oceania
GUT_GENOME236701	SRS476187_24	HGM	MAG	1874639	63	75317	31.08	100	0	NA	0	0	0	20	NA	GUT_GENOME132205	MGYG-HGUT-02163	d__Archaea;p__Methanobacteriota;c__Methanobacteria;o__Methanobacteriales;f__Methanobacteriaceae;g__Methanobrevibacter_A;s__Methanobrevibacter_A smithii	SRS476187	SRP029441	Fiji	Oceania
GUT_GENOME236703	SRS476187_2	HGM	MAG	1089350	87	16601	47.81	84.54	0.87	NA	85.71	67.57	10.97	15	NA	GUT_GENOME020782	MGYG-HGUT-00654	d__Archaea;p__Thermoplasmatota;c__Thermoplasmata;o__Methanomassiliicoccales;f__Methanomethylophilaceae;g__;s__	SRS476187	SRP029441	Fiji	Oceania
GUT_GENOME236709	SRS476187_56	HGM	MAG	1470263	130	15550	58.16	83.47	1.61	NA	86.55	0	12.91	19	NA	GUT_GENOME268463	MGYG-HGUT-04339	d__Archaea;p__Thermoplasmatota;c__Thermoplasmata;o__Methanomassiliicoccales;f__Methanomethylophilaceae;g__UBA71;s__	SRS476187	SRP029441	Fiji	Oceania
GUT_GENOME236826	SRS476192_17	HGM	MAG	1503547	108	19228	58.22	85.89	0.81	NA	0	0	99.13	18	NA	GUT_GENOME268463	MGYG-HGUT-04339	d__Archaea;p__Thermoplasmatota;c__Thermoplasmata;o__Methanomassiliicoccales;f__Methanomethylophilaceae;g__UBA71;s__	SRS476192	SRP029441	Fiji	Oceania
GUT_GENOME236870	SRS476193_44	HGM	MAG	1591883	293	6894	31.48	95.33	2.65	NA	0	11.44	0	17	NA	GUT_GENOME236870	MGYG-HGUT-03516	d__Archaea;p__Methanobacteriota;c__Methanobacteria;o__Methanobacteriales;f__Methanobacteriaceae;g__Methanobrevibacter_A;s__	SRS476193	SRP029441	Fiji	Oceania
GUT_GENOME236887	SRS476193_74	HGM	MAG	1722504	503	4557	56.17	93.55	2.7	NA	88.24	0	0	17	NA	GUT_GENOME236887	MGYG-HGUT-03531	d__Archaea;p__Thermoplasmatota;c__Thermoplasmata;o__Methanomassiliicoccales;f__Methanomethylophilaceae;g__ISO4-G1;s__	SRS476193	SRP029441	Fiji	Oceania
GUT_GENOME236978	SRS476205_55	HGM	MAG	1325434	366	4610	31.76	82.34	3.2	NA	0	0	10.67	12	NA	GUT_GENOME132205	MGYG-HGUT-02163	d__Archaea;p__Methanobacteriota;c__Methanobacteria;o__Methanobacteriales;f__Methanobacteriaceae;g__Methanobrevibacter_A;s__Methanobrevibacter_A smithii	SRS476205	SRP029441	Fiji	Oceania
GUT_GENOME237054	SRS476212_49	HGM	MAG	1274444	621	2138	38.85	55.57	0.8	NA	0	0	0	13	NA	GUT_GENOME237054	MGYG-HGUT-03541	d__Archaea;p__Methanobacteriota;c__Methanobacteria;o__Methanobacteriales;f__Methanobacteriaceae;g__Methanobrevibacter_A;s__	SRS476212	SRP029441	Fiji	Oceania
GUT_GENOME237290	SRS476274_36	HGM	MAG	838175	462	1852	32.31	58.7	0.04	NA	0	0	0	12	NA	GUT_GENOME132205	MGYG-HGUT-02163	d__Archaea;p__Methanobacteriota;c__Methanobacteria;o__Methanobacteriales;f__Methanobacteriaceae;g__Methanobrevibacter_A;s__Methanobrevibacter_A smithii	SRS476274	SRP029441	Fiji	Oceania
GUT_GENOME237437	SRS476289_4	HGM	MAG	1281740	412	3670	31.42	83.09	2.4	NA	0	0	0	15	NA	GUT_GENOME236870	MGYG-HGUT-03516	d__Archaea;p__Methanobacteriota;c__Methanobacteria;o__Methanobacteriales;f__Methanobacteriaceae;g__Methanobrevibacter_A;s__	SRS476289	SRP029441	Fiji	Oceania
GUT_GENOME237625	SRS476302_80	HGM	MAG	1768385	26	123219	31.17	100	0.8	NA	0	0	99.5	20	NA	GUT_GENOME132205	MGYG-HGUT-02163	d__Archaea;p__Methanobacteriota;c__Methanobacteria;o__Methanobacteriales;f__Methanobacteriaceae;g__Methanobrevibacter_A;s__Methanobrevibacter_A smithii	SRS476302	SRP029441	Fiji	Oceania
GUT_GENOME237836	SRS476346_34	HGM	MAG	1024803	376	3054	47.28	83.91	2.61	NA	0	0	0	16	NA	GUT_GENOME237836	MGYG-HGUT-03602	d__Archaea;p__Halobacteriota;c__Methanomicrobia;o__Methanomicrobiales;f__Methanocorpusculaceae;g__Methanocorpusculum;s__	SRS476346	SRP029441	Fiji	Oceania
GUT_GENOME237904	SRS476430_114	HGM	MAG	2031161	525	5302	57.99	96.77	4.44	NA	86.55	99.8	99.13	18	NA	GUT_GENOME268463	MGYG-HGUT-04339	d__Archaea;p__Thermoplasmatota;c__Thermoplasmata;o__Methanomassiliicoccales;f__Methanomethylophilaceae;g__UBA71;s__	SRS476430	SRP029441	Fiji	Oceania
GUT_GENOME237951	SRS476430_75	HGM	MAG	1199988	279	5742	32.19	74.76	0	NA	0	0	0	8	NA	GUT_GENOME014311	MGYG-HGUT-00522	d__Archaea;p__Methanobacteriota;c__Methanobacteria;o__Methanobacteriales;f__Methanobacteriaceae;g__Methanobrevibacter_A;s__	SRS476430	SRP029441	Fiji	Oceania
GUT_GENOME238265	SRS476863_43	HGM	MAG	986282	415	2637	47.16	74.67	2.97	NA	93.28	99.8	99.5	18	NA	GUT_GENOME237836	MGYG-HGUT-03602	d__Archaea;p__Halobacteriota;c__Methanomicrobia;o__Methanomicrobiales;f__Methanocorpusculaceae;g__Methanocorpusculum;s__	SRS476863	SRP029441	Fiji	Oceania
GUT_GENOME238390	SRS820576_28	HGM	MAG	1002671	522	2027	31.38	67.88	2.53	NA	0	0	0	11	NA	GUT_GENOME132205	MGYG-HGUT-02163	d__Archaea;p__Methanobacteriota;c__Methanobacteria;o__Methanobacteriales;f__Methanobacteriaceae;g__Methanobrevibacter_A;s__Methanobrevibacter_A smithii	SRS820576	SRP052307	Peru	South America
GUT_GENOME238430	SRS820581_42	HGM	MAG	1191967	495	2755	31.38	69.27	1.2	1.38	0	0	0	14	NA	GUT_GENOME132205	MGYG-HGUT-02163	d__Archaea;p__Methanobacteriota;c__Methanobacteria;o__Methanobacteriales;f__Methanobacteriaceae;g__Methanobrevibacter_A;s__Methanobrevibacter_A smithii	SRS820581	SRP052307	Peru	South America
GUT_GENOME238481	SRS820585_5	HGM	MAG	1908320	59	88895	31.05	100	0	0.02	0	0	0	20	NA	GUT_GENOME132205	MGYG-HGUT-02163	d__Archaea;p__Methanobacteriota;c__Methanobacteria;o__Methanobacteriales;f__Methanobacteriaceae;g__Methanobrevibacter_A;s__Methanobrevibacter_A smithii	SRS820585	SRP052307	United States	North America
GUT_GENOME238503	SRS820587_48	HGM	MAG	1016250	466	2383	32.29	65.35	1.76	0.19	0	0	0	13	NA	GUT_GENOME132205	MGYG-HGUT-02163	d__Archaea;p__Methanobacteriota;c__Methanobacteria;o__Methanobacteriales;f__Methanobacteriaceae;g__Methanobrevibacter_A;s__Methanobrevibacter_A smithii	SRS820587	SRP052307	United States	North America
GUT_GENOME238655	SRS820595_50	HGM	MAG	1843730	140	21690	30.65	98.4	0	0.05	0	0	0	20	NA	GUT_GENOME143185	MGYG-HGUT-02446	d__Archaea;p__Methanobacteriota;c__Methanobacteria;o__Methanobacteriales;f__Methanobacteriaceae;g__Methanobrevibacter_A;s__Methanobrevibacter_A smithii_A	SRS820595	SRP052307	United States	North America
GUT_GENOME238716	SRS820598_43	HGM	MAG	1560181	346	6225	31.53	90.8	0	0.07	0	0	0	18	NA	GUT_GENOME132205	MGYG-HGUT-02163	d__Archaea;p__Methanobacteriota;c__Methanobacteria;o__Methanobacteriales;f__Methanobacteriaceae;g__Methanobrevibacter_A;s__Methanobrevibacter_A smithii	SRS820598	SRP052307	United States	North America
GUT_GENOME238897	SRS820607_59	HGM	MAG	1595286	221	9959	30.49	94.43	1.6	0.09	0	0	0	19	NA	GUT_GENOME143185	MGYG-HGUT-02446	d__Archaea;p__Methanobacteriota;c__Methanobacteria;o__Methanobacteriales;f__Methanobacteriaceae;g__Methanobrevibacter_A;s__Methanobrevibacter_A smithii_A	SRS820607	SRP052307	Peru	South America
GUT_GENOME238918	SRS820608_46	HGM	MAG	1570649	411	4908	30.5	87.12	0.4	0.22	0	0	0	20	NA	GUT_GENOME143185	MGYG-HGUT-02446	d__Archaea;p__Methanobacteriota;c__Methanobacteria;o__Methanobacteriales;f__Methanobacteriaceae;g__Methanobrevibacter_A;s__Methanobrevibacter_A smithii_A	SRS820608	SRP052307	Peru	South America
GUT_GENOME238957	SRS820610_4	HGM	MAG	1849077	72	46226	30.25	100	0	0.04	0	0	0	20	NA	GUT_GENOME143185	MGYG-HGUT-02446	d__Archaea;p__Methanobacteriota;c__Methanobacteria;o__Methanobacteriales;f__Methanobacteriaceae;g__Methanobrevibacter_A;s__Methanobrevibacter_A smithii_A	SRS820610	SRP052307	Peru	South America
GUT_GENOME238974	SRS820611_35	HGM	MAG	1748930	354	6935	30.4	98	2.4	0.23	0	0	0	20	NA	GUT_GENOME143185	MGYG-HGUT-02446	d__Archaea;p__Methanobacteriota;c__Methanobacteria;o__Methanobacteriales;f__Methanobacteriaceae;g__Methanobrevibacter_A;s__Methanobrevibacter_A smithii_A	SRS820611	SRP052307	Peru	South America
GUT_GENOME238991	SRS820612_40	HGM	MAG	1508521	460	4188	30.49	88.94	1.07	0.58	0	0	0	18	NA	GUT_GENOME143185	MGYG-HGUT-02446	d__Archaea;p__Methanobacteriota;c__Methanobacteria;o__Methanobacteriales;f__Methanobacteriaceae;g__Methanobrevibacter_A;s__Methanobrevibacter_A smithii_A	SRS820612	SRP052307	Peru	South America
GUT_GENOME239024	SRS820614_4	HGM	MAG	1739475	275	9532	30.41	96	1.64	0.1	0	0	0	20	NA	GUT_GENOME143185	MGYG-HGUT-02446	d__Archaea;p__Methanobacteriota;c__Methanobacteria;o__Methanobacteriales;f__Methanobacteriaceae;g__Methanobrevibacter_A;s__Methanobrevibacter_A smithii_A	SRS820614	SRP052307	Peru	South America
GUT_GENOME239080	SRS820617_5	HGM	MAG	1761530	36	75930	30.32	100	0	0.01	0	0	0	20	NA	GUT_GENOME143185	MGYG-HGUT-02446	d__Archaea;p__Methanobacteriota;c__Methanobacteria;o__Methanobacteriales;f__Methanobacteriaceae;g__Methanobrevibacter_A;s__Methanobrevibacter_A smithii_A	SRS820617	SRP052307	Peru	South America
GUT_GENOME239116	SRS820620_38	HGM	MAG	1837184	70	47915	30.23	99.2	0	0.02	0	0	0	20	NA	GUT_GENOME143185	MGYG-HGUT-02446	d__Archaea;p__Methanobacteriota;c__Methanobacteria;o__Methanobacteriales;f__Methanobacteriaceae;g__Methanobrevibacter_A;s__Methanobrevibacter_A smithii_A	SRS820620	SRP052307	Peru	South America
GUT_GENOME239133	SRS820621_28	HGM	MAG	1759391	184	14107	30.34	95.84	0.04	0.14	0	99.8	99.5	20	NA	GUT_GENOME143185	MGYG-HGUT-02446	d__Archaea;p__Methanobacteriota;c__Methanobacteria;o__Methanobacteriales;f__Methanobacteriaceae;g__Methanobrevibacter_A;s__Methanobrevibacter_A smithii_A	SRS820621	SRP052307	Peru	South America
GUT_GENOME239182	SRS820624_17	HGM	MAG	1843965	143	19698	30.42	98.4	0	0.04	0	99.8	99.5	19	NA	GUT_GENOME143185	MGYG-HGUT-02446	d__Archaea;p__Methanobacteriota;c__Methanobacteria;o__Methanobacteriales;f__Methanobacteriaceae;g__Methanobrevibacter_A;s__Methanobrevibacter_A smithii_A	SRS820624	SRP052307	Peru	South America
GUT_GENOME239209	SRS820625_4	HGM	MAG	1864390	100	38340	30.22	99.2	0	0.07	0	0	0	20	NA	GUT_GENOME143185	MGYG-HGUT-02446	d__Archaea;p__Methanobacteriota;c__Methanobacteria;o__Methanobacteriales;f__Methanobacteriaceae;g__Methanobrevibacter_A;s__Methanobrevibacter_A smithii_A	SRS820625	SRP052307	Peru	South America
GUT_GENOME239440	SRS883021_40	HGM	MAG	794387	386	2103	49.46	70.08	0.81	0.62	0	0	0	9	NA	GUT_GENOME020782	MGYG-HGUT-00654	d__Archaea;p__Thermoplasmatota;c__Thermoplasmata;o__Methanomassiliicoccales;f__Methanomethylophilaceae;g__;s__	SRS883021	SRP056480	United Republic of Tanzania	Africa
GUT_GENOME239447	SRS883021_6	HGM	MAG	1674423	610	3189	57.68	75.37	4.03	0.42	0	0	99.13	18	NA	GUT_GENOME268463	MGYG-HGUT-04339	d__Archaea;p__Thermoplasmatota;c__Thermoplasmata;o__Methanomassiliicoccales;f__Methanomethylophilaceae;g__UBA71;s__	SRS883021	SRP056480	United Republic of Tanzania	Africa
GUT_GENOME239592	SRS883067_10	HGM	MAG	1145245	527	2380	31.42	63.61	0.16	0.19	0	0	0	18	NA	GUT_GENOME143185	MGYG-HGUT-02446	d__Archaea;p__Methanobacteriota;c__Methanobacteria;o__Methanobacteriales;f__Methanobacteriaceae;g__Methanobrevibacter_A;s__Methanobrevibacter_A smithii_A	SRS883067	SRP056480	Italy	Europe
GUT_GENOME240080	VatanenT_2016__G78500__bin.4	CIBIO	MAG	1754957	311	7570	31.49	98	0	0.01	0	99.8	99.5	18	NA	GUT_GENOME132205	MGYG-HGUT-02163	d__Archaea;p__Methanobacteriota;c__Methanobacteria;o__Methanobacteriales;f__Methanobacteriaceae;g__Methanobrevibacter_A;s__Methanobrevibacter_A smithii	SRS1719583	SRP090628	Russia	Europe
GUT_GENOME242964	VincentC_2016__MM002.2__bin.14	CIBIO	MAG	1688150	363	5859	31.24	94.4	0.15	0.42	0	0	0	19	NA	GUT_GENOME132205	MGYG-HGUT-02163	d__Archaea;p__Methanobacteriota;c__Methanobacteria;o__Methanobacteriales;f__Methanobacteriaceae;g__Methanobrevibacter_A;s__Methanobrevibacter_A smithii	SRS1098512	SRP064400	Canada	North America
GUT_GENOME242992	VincentC_2016__MM004.2__bin.14	CIBIO	MAG	1697355	114	22438	31.19	97.6	0	0.08	0	0	0	20	NA	GUT_GENOME132205	MGYG-HGUT-02163	d__Archaea;p__Methanobacteriota;c__Methanobacteria;o__Methanobacteriales;f__Methanobacteriaceae;g__Methanobrevibacter_A;s__Methanobrevibacter_A smithii	SRS1101492	SRP064400	Canada	North America
GUT_GENOME243414	VincentC_2016__MM029.3__bin.23	CIBIO	MAG	1498491	340	5395	31.05	80.97	0.8	0.43	0	97.83	0	14	NA	GUT_GENOME132205	MGYG-HGUT-02163	d__Archaea;p__Methanobacteriota;c__Methanobacteria;o__Methanobacteriales;f__Methanobacteriaceae;g__Methanobrevibacter_A;s__Methanobrevibacter_A smithii	SRS1101465	SRP064400	Canada	North America
GUT_GENOME243757	VincentC_2016__MM055.6__bin.5	CIBIO	MAG	1586324	50	50712	31.39	99.2	0	0.05	0	99.8	0	20	NA	GUT_GENOME132205	MGYG-HGUT-02163	d__Archaea;p__Methanobacteriota;c__Methanobacteria;o__Methanobacteriales;f__Methanobacteriaceae;g__Methanobrevibacter_A;s__Methanobrevibacter_A smithii	SRS1101235	SRP064400	Canada	North America
GUT_GENOME243940	VincentC_2016__MM064.1__bin.25	CIBIO	MAG	1153308	238	6320	31.18	50.61	0	0.13	0	0	0	18	NA	GUT_GENOME132205	MGYG-HGUT-02163	d__Archaea;p__Methanobacteriota;c__Methanobacteria;o__Methanobacteriales;f__Methanobacteriaceae;g__Methanobrevibacter_A;s__Methanobrevibacter_A smithii	SRS1101267	SRP064400	Canada	North America
GUT_GENOME244017	VincentC_2016__MM074.1__bin.1	CIBIO	MAG	1147925	91	15876	31.04	62.67	1.6	0.07	0	0	0	18	NA	GUT_GENOME132205	MGYG-HGUT-02163	d__Archaea;p__Methanobacteriota;c__Methanobacteria;o__Methanobacteriales;f__Methanobacteriaceae;g__Methanobrevibacter_A;s__Methanobrevibacter_A smithii	SRS1101276	SRP064400	Canada	North America
GUT_GENOME244611	VogtmannE_2016__MMRS15137911ST-27-0-0__bin.70	CIBIO	MAG	1843202	25	102900	30.54	100	0	0.1	0	0	0	20	NA	GUT_GENOME143185	MGYG-HGUT-02446	d__Archaea;p__Methanobacteriota;c__Methanobacteria;o__Methanobacteriales;f__Methanobacteriaceae;g__Methanobrevibacter_A;s__Methanobrevibacter_A smithii_A	ERS1066738	ERP013933	United States	North America
GUT_GENOME244615	VogtmannE_2016__MMRS15137911ST-27-0-0__bin.79	CIBIO	MAG	1406687	231	8385	41.82	83.2	3.84	0.49	92.44	0	29.4	17	NA	GUT_GENOME132202	MGYG-HGUT-02160	d__Archaea;p__Thermoplasmatota;c__Thermoplasmata;o__Methanomassiliicoccales;f__Methanomassiliicoccaceae;g__Methanomassiliicoccus_A;s__Methanomassiliicoccus_A intestinalis	ERS1066738	ERP013933	United States	North America
GUT_GENOME244876	VogtmannE_2016__MMRS25641480ST-27-0-0__bin.53	CIBIO	MAG	1795087	27	141700	31.08	100	0	0.06	0	0	0	20	NA	GUT_GENOME132205	MGYG-HGUT-02163	d__Archaea;p__Methanobacteriota;c__Methanobacteria;o__Methanobacteriales;f__Methanobacteriaceae;g__Methanobrevibacter_A;s__Methanobrevibacter_A smithii	ERS1066697	ERP013933	United States	North America
GUT_GENOME245208	VogtmannE_2016__MMRS38954404ST-27-0-0__bin.71	CIBIO	MAG	1859018	41	108549	31.06	100	0	0.05	0	0	0	20	NA	GUT_GENOME132205	MGYG-HGUT-02163	d__Archaea;p__Methanobacteriota;c__Methanobacteria;o__Methanobacteriales;f__Methanobacteriaceae;g__Methanobrevibacter_A;s__Methanobrevibacter_A smithii	ERS1066708	ERP013933	United States	North America
GUT_GENOME245729	VogtmannE_2016__MMRS51737257ST-27-0-0__bin.24	CIBIO	MAG	1704493	197	10718	58.45	91.2	1.48	0.05	86.55	0	0	19	NA	GUT_GENOME268463	MGYG-HGUT-04339	d__Archaea;p__Thermoplasmatota;c__Thermoplasmata;o__Methanomassiliicoccales;f__Methanomethylophilaceae;g__UBA71;s__	ERS1066662	ERP013933	United States	North America
GUT_GENOME245793	VogtmannE_2016__MMRS54316675ST-27-0-0__bin.11	CIBIO	MAG	1160161	383	3248	32.64	74.05	1.33	0.04	0	0	0	7	NA	GUT_GENOME132205	MGYG-HGUT-02163	d__Archaea;p__Methanobacteriota;c__Methanobacteria;o__Methanobacteriales;f__Methanobacteriaceae;g__Methanobrevibacter_A;s__Methanobrevibacter_A smithii	ERS1066668	ERP013933	United States	North America
GUT_GENOME246574	VogtmannE_2016__MMRS72980899ST-27-0-0__bin.57	CIBIO	MAG	1495151	319	5717	31.78	87.44	0	0.03	0	0	0	19	NA	GUT_GENOME132205	MGYG-HGUT-02163	d__Archaea;p__Methanobacteriota;c__Methanobacteria;o__Methanobacteriales;f__Methanobacteriaceae;g__Methanobrevibacter_A;s__Methanobrevibacter_A smithii	ERS1066701	ERP013933	United States	North America
GUT_GENOME246722	VogtmannE_2016__MMRS77487595ST-27-0-0__bin.70	CIBIO	MAG	1147550	371	3387	32.92	70.87	0	0.04	0	0	0	10	NA	GUT_GENOME132205	MGYG-HGUT-02163	d__Archaea;p__Methanobacteriota;c__Methanobacteria;o__Methanobacteriales;f__Methanobacteriaceae;g__Methanobrevibacter_A;s__Methanobrevibacter_A smithii	ERS1066706	ERP013933	United States	North America
GUT_GENOME246782	VogtmannE_2016__MMRS80093644ST-27-0-0__bin.1	CIBIO	MAG	1800042	20	168822	31.1	100	0	0.06	0	0	0	20	NA	GUT_GENOME132205	MGYG-HGUT-02163	d__Archaea;p__Methanobacteriota;c__Methanobacteria;o__Methanobacteriales;f__Methanobacteriaceae;g__Methanobrevibacter_A;s__Methanobrevibacter_A smithii	ERS1066671	ERP013933	United States	North America
GUT_GENOME246955	VogtmannE_2016__MMRS84159866ST-27-0-0__bin.64	CIBIO	MAG	1377932	310	5224	32.15	85.14	1.07	0.05	0	0	99.5	14	NA	GUT_GENOME132205	MGYG-HGUT-02163	d__Archaea;p__Methanobacteriota;c__Methanobacteria;o__Methanobacteriales;f__Methanobacteriaceae;g__Methanobrevibacter_A;s__Methanobrevibacter_A smithii	ERS1066681	ERP013933	United States	North America
GUT_GENOME247230	VogtmannE_2016__MMRS88581325ST-27-0-0__bin.5	CIBIO	MAG	1767803	24	111012	59.88	98.79	0	0.04	86.55	99.8	99.16	20	NA	GUT_GENOME247230	MGYG-HGUT-03888	d__Archaea;p__Thermoplasmatota;c__Thermoplasmata;o__Methanomassiliicoccales;f__Methanomethylophilaceae;g__UBA71;s__	ERS1066705	ERP013933	United States	North America
GUT_GENOME247234	VogtmannE_2016__MMRS88581325ST-27-0-0__bin.63	CIBIO	MAG	1767226	295	8156	31.38	95.14	0	0.07	0	0	0	17	NA	GUT_GENOME132205	MGYG-HGUT-02163	d__Archaea;p__Methanobacteriota;c__Methanobacteria;o__Methanobacteriales;f__Methanobacteriaceae;g__Methanobrevibacter_A;s__Methanobrevibacter_A smithii	ERS1066705	ERP013933	United States	North America
GUT_GENOME247406	VogtmannE_2016__MMRS93621581ST-27-0-0__bin.15	CIBIO	MAG	1816952	198	13675	41.17	86.19	0.81	0.11	92.44	61.34	99.03	20	NA	GUT_GENOME132202	MGYG-HGUT-02160	d__Archaea;p__Thermoplasmatota;c__Thermoplasmata;o__Methanomassiliicoccales;f__Methanomassiliicoccaceae;g__Methanomassiliicoccus_A;s__Methanomassiliicoccus_A intestinalis	ERS1066711	ERP013933	United States	North America
GUT_GENOME247414	VogtmannE_2016__MMRS93621581ST-27-0-0__bin.29	CIBIO	MAG	1777699	34	88538	31.17	100	0	0.05	0	0	0	20	NA	GUT_GENOME132205	MGYG-HGUT-02163	d__Archaea;p__Methanobacteriota;c__Methanobacteria;o__Methanobacteriales;f__Methanobacteriaceae;g__Methanobrevibacter_A;s__Methanobrevibacter_A smithii	ERS1066711	ERP013933	United States	North America
GUT_GENOME247693	VogtmannE_2016__MMRS97327636ST-27-0-0__bin.6	CIBIO	MAG	1519920	475	3456	32.71	71.26	1.66	0.03	0	0	0	10	NA	GUT_GENOME132205	MGYG-HGUT-02163	d__Archaea;p__Methanobacteriota;c__Methanobacteria;o__Methanobacteriales;f__Methanobacteriaceae;g__Methanobrevibacter_A;s__Methanobrevibacter_A smithii	ERS1066743	ERP013933	United States	North America
GUT_GENOME249124	WenC_2017__N315__bin.42	CIBIO	MAG	1285673	235	6651	31.92	78.77	0	0.04	0	0	0	15	NA	GUT_GENOME132205	MGYG-HGUT-02163	d__Archaea;p__Methanobacteriota;c__Methanobacteria;o__Methanobacteriales;f__Methanobacteriaceae;g__Methanobrevibacter_A;s__Methanobrevibacter_A smithii	SRS1846766	SRP094805	China	Asia
GUT_GENOME250989	XieH_2016__YSZC12003_35387__bin.4	CIBIO	MAG	1108816	10	158194	30.9	55.2	0	0.01	0	0	0	13	NA	GUT_GENOME132205	MGYG-HGUT-02163	d__Archaea;p__Methanobacteriota;c__Methanobacteria;o__Methanobacteriales;f__Methanobacteriaceae;g__Methanobrevibacter_A;s__Methanobrevibacter_A smithii	ERS746711	ERP010700	United Kingdom	Europe
GUT_GENOME251200	XieH_2016__YSZC12003_35505__bin.23	CIBIO	MAG	1155865	7	300437	31.34	78.4	0	0	0	0	0	17	NA	GUT_GENOME132205	MGYG-HGUT-02163	d__Archaea;p__Methanobacteriota;c__Methanobacteria;o__Methanobacteriales;f__Methanobacteriaceae;g__Methanobrevibacter_A;s__Methanobrevibacter_A smithii	ERS746881	ERP010700	United Kingdom	Europe
GUT_GENOME251279	XieH_2016__YSZC12003_35506__bin.82	CIBIO	MAG	1843355	210	11912	30.43	99.2	0.53	0.05	0	99.8	99.5	20	NA	GUT_GENOME143185	MGYG-HGUT-02446	d__Archaea;p__Methanobacteriota;c__Methanobacteria;o__Methanobacteriales;f__Methanobacteriaceae;g__Methanobrevibacter_A;s__Methanobrevibacter_A smithii_A	ERS746882	ERP010700	United Kingdom	Europe
GUT_GENOME251364	XieH_2016__YSZC12003_35515__bin.27	CIBIO	MAG	1906607	23	133512	30.25	100	0	0.02	0	0	0	20	NA	GUT_GENOME143185	MGYG-HGUT-02446	d__Archaea;p__Methanobacteriota;c__Methanobacteria;o__Methanobacteriales;f__Methanobacteriaceae;g__Methanobrevibacter_A;s__Methanobrevibacter_A smithii_A	ERS746715	ERP010700	United Kingdom	Europe
GUT_GENOME251470	XieH_2016__YSZC12003_35519__bin.71	CIBIO	MAG	1743760	33	109028	31.1	100	0	0.01	0	0	0	20	NA	GUT_GENOME132205	MGYG-HGUT-02163	d__Archaea;p__Methanobacteriota;c__Methanobacteria;o__Methanobacteriales;f__Methanobacteriaceae;g__Methanobrevibacter_A;s__Methanobrevibacter_A smithii	ERS746832	ERP010700	United Kingdom	Europe
GUT_GENOME251508	XieH_2016__YSZC12003_35520__bin.147	CIBIO	MAG	1752475	32	104794	31.09	100	0	0.01	0	0	0	20	NA	GUT_GENOME132205	MGYG-HGUT-02163	d__Archaea;p__Methanobacteriota;c__Methanobacteria;o__Methanobacteriales;f__Methanobacteriaceae;g__Methanobrevibacter_A;s__Methanobrevibacter_A smithii	ERS746833	ERP010700	United Kingdom	Europe
GUT_GENOME251707	XieH_2016__YSZC12003_35549__bin.111	CIBIO	MAG	1678621	88	32818	31.35	99.2	0	0.02	0	0	0	20	NA	GUT_GENOME132205	MGYG-HGUT-02163	d__Archaea;p__Methanobacteriota;c__Methanobacteria;o__Methanobacteriales;f__Methanobacteriaceae;g__Methanobrevibacter_A;s__Methanobrevibacter_A smithii	ERS746720	ERP010700	United Kingdom	Europe
GUT_GENOME251770	XieH_2016__YSZC12003_35550__bin.115	CIBIO	MAG	1686078	61	52021	31.31	99.6	0	0.01	0	99.8	99.5	20	NA	GUT_GENOME132205	MGYG-HGUT-02163	d__Archaea;p__Methanobacteriota;c__Methanobacteria;o__Methanobacteriales;f__Methanobacteriaceae;g__Methanobrevibacter_A;s__Methanobrevibacter_A smithii	ERS746721	ERP010700	United Kingdom	Europe
GUT_GENOME251929	XieH_2016__YSZC12003_35561__bin.51	CIBIO	MAG	1726701	7	318780	59.71	98.79	0	0	86.55	99.8	99.16	20	NA	GUT_GENOME251929	MGYG-HGUT-03962	d__Archaea;p__Thermoplasmatota;c__Thermoplasmata;o__Methanomassiliicoccales;f__Methanomethylophilaceae;g__UBA71;s__	ERS746836	ERP010700	United Kingdom	Europe
GUT_GENOME251961	XieH_2016__YSZC12003_35562__bin.20	CIBIO	MAG	1815580	10	517152	31.31	100	0.8	0.01	0	0	0	20	NA	GUT_GENOME132205	MGYG-HGUT-02163	d__Archaea;p__Methanobacteriota;c__Methanobacteria;o__Methanobacteriales;f__Methanobacteriaceae;g__Methanobrevibacter_A;s__Methanobrevibacter_A smithii	ERS746837	ERP010700	United Kingdom	Europe
GUT_GENOME252237	XieH_2016__YSZC12003_35630__bin.17	CIBIO	MAG	1746000	21	109748	31.03	100	0	0.01	0	0	0	20	NA	GUT_GENOME132205	MGYG-HGUT-02163	d__Archaea;p__Methanobacteriota;c__Methanobacteria;o__Methanobacteriales;f__Methanobacteriaceae;g__Methanobrevibacter_A;s__Methanobrevibacter_A smithii	ERS746727	ERP010700	United Kingdom	Europe
GUT_GENOME252389	XieH_2016__YSZC12003_35654__bin.77	CIBIO	MAG	1175051	11	142895	30.83	58.4	0	0.01	0	0	0	13	NA	GUT_GENOME132205	MGYG-HGUT-02163	d__Archaea;p__Methanobacteriota;c__Methanobacteria;o__Methanobacteriales;f__Methanobacteriaceae;g__Methanobrevibacter_A;s__Methanobrevibacter_A smithii	ERS746887	ERP010700	United Kingdom	Europe
GUT_GENOME252492	XieH_2016__YSZC12003_35665__bin.47	CIBIO	MAG	1749125	29	92980	31.11	100	0	0	0	0	0	20	NA	GUT_GENOME132205	MGYG-HGUT-02163	d__Archaea;p__Methanobacteriota;c__Methanobacteria;o__Methanobacteriales;f__Methanobacteriaceae;g__Methanobrevibacter_A;s__Methanobrevibacter_A smithii	ERS746731	ERP010700	United Kingdom	Europe
GUT_GENOME252780	XieH_2016__YSZC12003_35707__bin.43	CIBIO	MAG	1772187	15	241541	31.07	100	0	0.01	0	0	0	20	NA	GUT_GENOME132205	MGYG-HGUT-02163	d__Archaea;p__Methanobacteriota;c__Methanobacteria;o__Methanobacteriales;f__Methanobacteriaceae;g__Methanobrevibacter_A;s__Methanobrevibacter_A smithii	ERS746941	ERP010700	United Kingdom	Europe
GUT_GENOME253399	XieH_2016__YSZC12003_35980__bin.66	CIBIO	MAG	1009071	90	15454	32.3	83.85	0	0.01	0	0	0	20	NA	GUT_GENOME132205	MGYG-HGUT-02163	d__Archaea;p__Methanobacteriota;c__Methanobacteria;o__Methanobacteriales;f__Methanobacteriaceae;g__Methanobrevibacter_A;s__Methanobrevibacter_A smithii	ERS746744	ERP010700	United Kingdom	Europe
GUT_GENOME253451	XieH_2016__YSZC12003_35989__bin.4	CIBIO	MAG	1787534	13	215240	31.01	99.2	0	0.01	0	0	0	20	NA	GUT_GENOME132205	MGYG-HGUT-02163	d__Archaea;p__Methanobacteriota;c__Methanobacteria;o__Methanobacteriales;f__Methanobacteriaceae;g__Methanobrevibacter_A;s__Methanobrevibacter_A smithii	ERS746843	ERP010700	United Kingdom	Europe
GUT_GENOME253503	XieH_2016__YSZC12003_35990__bin.50	CIBIO	MAG	1659792	22	129676	31.12	92	0	0	0	0	0	20	NA	GUT_GENOME132205	MGYG-HGUT-02163	d__Archaea;p__Methanobacteriota;c__Methanobacteria;o__Methanobacteriales;f__Methanobacteriaceae;g__Methanobrevibacter_A;s__Methanobrevibacter_A smithii	ERS746890	ERP010700	United Kingdom	Europe
GUT_GENOME253592	XieH_2016__YSZC12003_35992__bin.47	CIBIO	MAG	1218020	20	108695	31.19	70.4	0	0.01	0	0	0	19	NA	GUT_GENOME132205	MGYG-HGUT-02163	d__Archaea;p__Methanobacteriota;c__Methanobacteria;o__Methanobacteriales;f__Methanobacteriaceae;g__Methanobrevibacter_A;s__Methanobrevibacter_A smithii	ERS746746	ERP010700	United Kingdom	Europe
GUT_GENOME253650	XieH_2016__YSZC12003_35999__bin.60	CIBIO	MAG	1734512	5	517773	31.12	100	0	0	0	0	0	20	NA	GUT_GENOME132205	MGYG-HGUT-02163	d__Archaea;p__Methanobacteriota;c__Methanobacteria;o__Methanobacteriales;f__Methanobacteriaceae;g__Methanobrevibacter_A;s__Methanobrevibacter_A smithii	ERS746943	ERP010700	United Kingdom	Europe
GUT_GENOME253723	XieH_2016__YSZC12003_36000__bin.99	CIBIO	MAG	1766870	27	153815	31	100	0	0	0	0	0	20	NA	GUT_GENOME132205	MGYG-HGUT-02163	d__Archaea;p__Methanobacteriota;c__Methanobacteria;o__Methanobacteriales;f__Methanobacteriaceae;g__Methanobrevibacter_A;s__Methanobrevibacter_A smithii	ERS746944	ERP010700	United Kingdom	Europe
GUT_GENOME253726	XieH_2016__YSZC12003_36005__bin.12	CIBIO	MAG	1581401	17	119907	31.24	95.2	0	0.01	0	0	0	20	NA	GUT_GENOME132205	MGYG-HGUT-02163	d__Archaea;p__Methanobacteriota;c__Methanobacteria;o__Methanobacteriales;f__Methanobacteriaceae;g__Methanobrevibacter_A;s__Methanobrevibacter_A smithii	ERS746747	ERP010700	United Kingdom	Europe
GUT_GENOME253812	XieH_2016__YSZC12003_36006__bin.90	CIBIO	MAG	1917635	24	176110	31.07	100	0.8	0	0	99.8	0	20	NA	GUT_GENOME132205	MGYG-HGUT-02163	d__Archaea;p__Methanobacteriota;c__Methanobacteria;o__Methanobacteriales;f__Methanobacteriaceae;g__Methanobrevibacter_A;s__Methanobrevibacter_A smithii	ERS746748	ERP010700	United Kingdom	Europe
GUT_GENOME253897	XieH_2016__YSZC12003_36008__bin.46	CIBIO	MAG	1649606	190	12935	58.6	93.02	0.81	0.05	86.55	0	0	18	NA	GUT_GENOME268463	MGYG-HGUT-04339	d__Archaea;p__Thermoplasmatota;c__Thermoplasmata;o__Methanomassiliicoccales;f__Methanomethylophilaceae;g__UBA71;s__	ERS746844	ERP010700	United Kingdom	Europe
GUT_GENOME253955	XieH_2016__YSZC12003_36012__bin.21	CIBIO	MAG	1804129	10	233335	31	100	0	0	0	0	0	20	NA	GUT_GENOME132205	MGYG-HGUT-02163	d__Archaea;p__Methanobacteriota;c__Methanobacteria;o__Methanobacteriales;f__Methanobacteriaceae;g__Methanobrevibacter_A;s__Methanobrevibacter_A smithii	ERS746892	ERP010700	United Kingdom	Europe
GUT_GENOME254183	XieH_2016__YSZC12003_36049__bin.50	CIBIO	MAG	981710	195	6061	32.11	69.96	0.16	0.29	0	0	0	13	NA	GUT_GENOME132205	MGYG-HGUT-02163	d__Archaea;p__Methanobacteriota;c__Methanobacteria;o__Methanobacteriales;f__Methanobacteriaceae;g__Methanobrevibacter_A;s__Methanobrevibacter_A smithii	ERS746752	ERP010700	United Kingdom	Europe
GUT_GENOME254381	XieH_2016__YSZC12003_36055__bin.70	CIBIO	MAG	1139252	8	287938	31.39	71.2	0	0.01	0	0	0	17	NA	GUT_GENOME132205	MGYG-HGUT-02163	d__Archaea;p__Methanobacteriota;c__Methanobacteria;o__Methanobacteriales;f__Methanobacteriaceae;g__Methanobrevibacter_A;s__Methanobrevibacter_A smithii	ERS746894	ERP010700	United Kingdom	Europe
GUT_GENOME254438	XieH_2016__YSZC12003_36056__bin.82	CIBIO	MAG	1494293	72	27405	31.55	96	0	0.08	0	99.8	99.5	20	NA	GUT_GENOME132205	MGYG-HGUT-02163	d__Archaea;p__Methanobacteriota;c__Methanobacteria;o__Methanobacteriales;f__Methanobacteriaceae;g__Methanobrevibacter_A;s__Methanobrevibacter_A smithii	ERS746753	ERP010700	United Kingdom	Europe
GUT_GENOME254471	XieH_2016__YSZC12003_36057__bin.65	CIBIO	MAG	1818657	65	44724	31.1	100	0	0.02	0	0	0	20	NA	GUT_GENOME132205	MGYG-HGUT-02163	d__Archaea;p__Methanobacteriota;c__Methanobacteria;o__Methanobacteriales;f__Methanobacteriaceae;g__Methanobrevibacter_A;s__Methanobrevibacter_A smithii	ERS746754	ERP010700	United Kingdom	Europe
GUT_GENOME254537	XieH_2016__YSZC12003_36058__bin.64	CIBIO	MAG	1560919	84	24934	30.78	94.13	0	0.04	0	99.8	99.5	18	NA	GUT_GENOME143185	MGYG-HGUT-02446	d__Archaea;p__Methanobacteriota;c__Methanobacteria;o__Methanobacteriales;f__Methanobacteriaceae;g__Methanobrevibacter_A;s__Methanobrevibacter_A smithii_A	ERS746755	ERP010700	United Kingdom	Europe
GUT_GENOME254573	XieH_2016__YSZC12003_36116__bin.47	CIBIO	MAG	1743433	12	494917	31.01	100	0	0.01	0	0	0	20	NA	GUT_GENOME132205	MGYG-HGUT-02163	d__Archaea;p__Methanobacteriota;c__Methanobacteria;o__Methanobacteriales;f__Methanobacteriaceae;g__Methanobrevibacter_A;s__Methanobrevibacter_A smithii	ERS746756	ERP010700	United Kingdom	Europe
GUT_GENOME254932	XieH_2016__YSZC12003_36244__bin.63	CIBIO	MAG	1757695	19	181192	31.41	99.2	0	0.01	0	0	0	20	NA	GUT_GENOME132205	MGYG-HGUT-02163	d__Archaea;p__Methanobacteriota;c__Methanobacteria;o__Methanobacteriales;f__Methanobacteriaceae;g__Methanobrevibacter_A;s__Methanobrevibacter_A smithii	ERS746851	ERP010700	United Kingdom	Europe
GUT_GENOME255073	XieH_2016__YSZC12003_36439__bin.81	CIBIO	MAG	1718311	20	92046	31.13	100	0	0	0	0	0	20	NA	GUT_GENOME132205	MGYG-HGUT-02163	d__Archaea;p__Methanobacteriota;c__Methanobacteria;o__Methanobacteriales;f__Methanobacteriaceae;g__Methanobrevibacter_A;s__Methanobrevibacter_A smithii	ERS746762	ERP010700	United Kingdom	Europe
GUT_GENOME255326	XieH_2016__YSZC12003_36521__bin.93	CIBIO	MAG	1731726	16	185485	31.05	100	0	0	0	0	0	20	NA	GUT_GENOME132205	MGYG-HGUT-02163	d__Archaea;p__Methanobacteriota;c__Methanobacteria;o__Methanobacteriales;f__Methanobacteriaceae;g__Methanobrevibacter_A;s__Methanobrevibacter_A smithii	ERS746767	ERP010700	United Kingdom	Europe
GUT_GENOME255338	XieH_2016__YSZC12003_36522__bin.24	CIBIO	MAG	900131	13	328475	31.53	60	0	0	0	0	0	16	NA	GUT_GENOME132205	MGYG-HGUT-02163	d__Archaea;p__Methanobacteriota;c__Methanobacteria;o__Methanobacteriales;f__Methanobacteriaceae;g__Methanobrevibacter_A;s__Methanobrevibacter_A smithii	ERS746768	ERP010700	United Kingdom	Europe
GUT_GENOME255423	XieH_2016__YSZC12003_36526__bin.22	CIBIO	MAG	1655007	68	43350	30.64	95.2	0	0.02	0	99.8	99.5	20	NA	GUT_GENOME143185	MGYG-HGUT-02446	d__Archaea;p__Methanobacteriota;c__Methanobacteria;o__Methanobacteriales;f__Methanobacteriaceae;g__Methanobrevibacter_A;s__Methanobrevibacter_A smithii_A	ERS746769	ERP010700	United Kingdom	Europe
GUT_GENOME255505	XieH_2016__YSZC12003_36533__bin.86	CIBIO	MAG	1711697	14	231124	31.22	100	0.4	0.01	0	99.8	99.5	20	NA	GUT_GENOME132205	MGYG-HGUT-02163	d__Archaea;p__Methanobacteriota;c__Methanobacteria;o__Methanobacteriales;f__Methanobacteriaceae;g__Methanobrevibacter_A;s__Methanobrevibacter_A smithii	ERS746856	ERP010700	United Kingdom	Europe
GUT_GENOME255514	XieH_2016__YSZC12003_36534__bin.22	CIBIO	MAG	1491638	96	22170	30.83	89.6	0.31	0.04	0	0	0	19	NA	GUT_GENOME143185	MGYG-HGUT-02446	d__Archaea;p__Methanobacteriota;c__Methanobacteria;o__Methanobacteriales;f__Methanobacteriaceae;g__Methanobrevibacter_A;s__Methanobrevibacter_A smithii_A	ERS746770	ERP010700	United Kingdom	Europe
GUT_GENOME255634	XieH_2016__YSZC12003_36588__bin.96	CIBIO	MAG	1843026	23	131206	30.33	100	0	0.01	0	0	10.4	20	NA	GUT_GENOME143185	MGYG-HGUT-02446	d__Archaea;p__Methanobacteriota;c__Methanobacteria;o__Methanobacteriales;f__Methanobacteriaceae;g__Methanobrevibacter_A;s__Methanobrevibacter_A smithii_A	ERS746772	ERP010700	United Kingdom	Europe
GUT_GENOME255730	XieH_2016__YSZC12003_36667__bin.89	CIBIO	MAG	1829437	33	87397	31	100	0	0.01	0	0	0	20	NA	GUT_GENOME132205	MGYG-HGUT-02163	d__Archaea;p__Methanobacteriota;c__Methanobacteria;o__Methanobacteriales;f__Methanobacteriaceae;g__Methanobrevibacter_A;s__Methanobrevibacter_A smithii	ERS746774	ERP010700	United Kingdom	Europe
GUT_GENOME255895	XieH_2016__YSZC12003_36695__bin.39	CIBIO	MAG	1300809	5	480451	31.38	84	0	0.01	0	0	0	19	NA	GUT_GENOME132205	MGYG-HGUT-02163	d__Archaea;p__Methanobacteriota;c__Methanobacteria;o__Methanobacteriales;f__Methanobacteriaceae;g__Methanobrevibacter_A;s__Methanobrevibacter_A smithii	ERS746946	ERP010700	United Kingdom	Europe
GUT_GENOME256096	XieH_2016__YSZC12003_36699__bin.96	CIBIO	MAG	1338752	17	101901	31.24	86.4	0	0.01	0	0	0	18	NA	GUT_GENOME132205	MGYG-HGUT-02163	d__Archaea;p__Methanobacteriota;c__Methanobacteria;o__Methanobacteriales;f__Methanobacteriaceae;g__Methanobrevibacter_A;s__Methanobrevibacter_A smithii	ERS746858	ERP010700	United Kingdom	Europe
GUT_GENOME256362	XieH_2016__YSZC12003_37097__bin.39	CIBIO	MAG	848745	15	164955	31.47	51.2	0	0	0	0	0	16	NA	GUT_GENOME132205	MGYG-HGUT-02163	d__Archaea;p__Methanobacteriota;c__Methanobacteria;o__Methanobacteriales;f__Methanobacteriaceae;g__Methanobrevibacter_A;s__Methanobrevibacter_A smithii	ERS746861	ERP010700	United Kingdom	Europe
GUT_GENOME256439	XieH_2016__YSZC12003_37100__bin.52	CIBIO	MAG	1817585	37	170644	31	99.2	0	0.02	0	0	0	20	NA	GUT_GENOME132205	MGYG-HGUT-02163	d__Archaea;p__Methanobacteriota;c__Methanobacteria;o__Methanobacteriales;f__Methanobacteriaceae;g__Methanobrevibacter_A;s__Methanobrevibacter_A smithii	ERS746862	ERP010700	United Kingdom	Europe
GUT_GENOME256508	XieH_2016__YSZC12003_37101__bin.64	CIBIO	MAG	1370446	7	375028	31.38	86.4	0	0.01	0	99.8	99.5	20	NA	GUT_GENOME132205	MGYG-HGUT-02163	d__Archaea;p__Methanobacteriota;c__Methanobacteria;o__Methanobacteriales;f__Methanobacteriaceae;g__Methanobrevibacter_A;s__Methanobrevibacter_A smithii	ERS746783	ERP010700	United Kingdom	Europe
GUT_GENOME256657	XieH_2016__YSZC12003_37105__bin.70	CIBIO	MAG	1895936	50	71755	30.23	100	0	0.02	0	0	0	20	NA	GUT_GENOME143185	MGYG-HGUT-02446	d__Archaea;p__Methanobacteriota;c__Methanobacteria;o__Methanobacteriales;f__Methanobacteriaceae;g__Methanobrevibacter_A;s__Methanobrevibacter_A smithii_A	ERS746784	ERP010700	United Kingdom	Europe
GUT_GENOME256937	XieH_2016__YSZC12003_37137__bin.1	CIBIO	MAG	1718491	4	757321	31.14	100	0	0	0	0	0	20	NA	GUT_GENOME132205	MGYG-HGUT-02163	d__Archaea;p__Methanobacteriota;c__Methanobacteria;o__Methanobacteriales;f__Methanobacteriaceae;g__Methanobrevibacter_A;s__Methanobrevibacter_A smithii	ERS746788	ERP010700	United Kingdom	Europe
GUT_GENOME257022	XieH_2016__YSZC12003_37138__bin.79	CIBIO	MAG	1745407	10	262833	31.18	100	0	0	0	0	0	20	NA	GUT_GENOME132205	MGYG-HGUT-02163	d__Archaea;p__Methanobacteriota;c__Methanobacteria;o__Methanobacteriales;f__Methanobacteriaceae;g__Methanobrevibacter_A;s__Methanobrevibacter_A smithii	ERS746789	ERP010700	United Kingdom	Europe
GUT_GENOME257036	XieH_2016__YSZC12003_37171__bin.14	CIBIO	MAG	1471556	112	19745	31.54	88	0.8	0.08	0	99.8	99.5	20	NA	GUT_GENOME132205	MGYG-HGUT-02163	d__Archaea;p__Methanobacteriota;c__Methanobacteria;o__Methanobacteriales;f__Methanobacteriaceae;g__Methanobrevibacter_A;s__Methanobrevibacter_A smithii	ERS746949	ERP010700	United Kingdom	Europe
GUT_GENOME257155	XieH_2016__YSZC12003_37173__bin.88	CIBIO	MAG	1537829	334	5789	30.93	86.8	0.12	0.09	0	0	0	18	NA	GUT_GENOME143185	MGYG-HGUT-02446	d__Archaea;p__Methanobacteriota;c__Methanobacteria;o__Methanobacteriales;f__Methanobacteriaceae;g__Methanobrevibacter_A;s__Methanobrevibacter_A smithii_A	ERS746791	ERP010700	United Kingdom	Europe
GUT_GENOME257337	XieH_2016__YSZC12003_37181R1__bin.60	CIBIO	MAG	1269338	4	527738	31.24	76.8	0	0	0	0	0	18	NA	GUT_GENOME132205	MGYG-HGUT-02163	d__Archaea;p__Methanobacteriota;c__Methanobacteria;o__Methanobacteriales;f__Methanobacteriaceae;g__Methanobrevibacter_A;s__Methanobrevibacter_A smithii	ERS746793	ERP010700	United Kingdom	Europe
GUT_GENOME257377	XieH_2016__YSZC12003_37182R1__bin.46	CIBIO	MAG	1040552	7	176440	30.86	52.8	0	0	0	0	0	13	NA	GUT_GENOME132205	MGYG-HGUT-02163	d__Archaea;p__Methanobacteriota;c__Methanobacteria;o__Methanobacteriales;f__Methanobacteriaceae;g__Methanobrevibacter_A;s__Methanobrevibacter_A smithii	ERS746865	ERP010700	United Kingdom	Europe
GUT_GENOME257522	XieH_2016__YSZC12003_37192R1__bin.98	CIBIO	MAG	1805946	28	154149	31	100	0	0.01	0	0	0	20	NA	GUT_GENOME132205	MGYG-HGUT-02163	d__Archaea;p__Methanobacteriota;c__Methanobacteria;o__Methanobacteriales;f__Methanobacteriaceae;g__Methanobrevibacter_A;s__Methanobrevibacter_A smithii	ERS746901	ERP010700	United Kingdom	Europe
GUT_GENOME257633	XieH_2016__YSZC12003_37196__bin.21	CIBIO	MAG	1588324	67	46253	31.3	98.4	0	0.02	0	0	0	20	NA	GUT_GENOME132205	MGYG-HGUT-02163	d__Archaea;p__Methanobacteriota;c__Methanobacteria;o__Methanobacteriales;f__Methanobacteriaceae;g__Methanobrevibacter_A;s__Methanobrevibacter_A smithii	ERS746799	ERP010700	United Kingdom	Europe
GUT_GENOME257702	XieH_2016__YSZC12003_37197R1__bin.66	CIBIO	MAG	1776792	178	15614	31.09	98.67	3.73	0.07	0	0	0	20	NA	GUT_GENOME132205	MGYG-HGUT-02163	d__Archaea;p__Methanobacteriota;c__Methanobacteria;o__Methanobacteriales;f__Methanobacteriaceae;g__Methanobrevibacter_A;s__Methanobrevibacter_A smithii	ERS746866	ERP010700	United Kingdom	Europe
GUT_GENOME257758	XieH_2016__YSZC12003_37198R1__bin.82	CIBIO	MAG	1677237	38	99246	31.14	100	0	0.01	0	0	0	20	NA	GUT_GENOME132205	MGYG-HGUT-02163	d__Archaea;p__Methanobacteriota;c__Methanobacteria;o__Methanobacteriales;f__Methanobacteriaceae;g__Methanobrevibacter_A;s__Methanobrevibacter_A smithii	ERS746800	ERP010700	United Kingdom	Europe
GUT_GENOME257832	XieH_2016__YSZC12003_37201__bin.25	CIBIO	MAG	1262811	16	113933	31.31	84	0	0	0	0	0	17	NA	GUT_GENOME132205	MGYG-HGUT-02163	d__Archaea;p__Methanobacteriota;c__Methanobacteria;o__Methanobacteriales;f__Methanobacteriaceae;g__Methanobrevibacter_A;s__Methanobrevibacter_A smithii	ERS746903	ERP010700	United Kingdom	Europe
GUT_GENOME257904	XieH_2016__YSZC12003_37203__bin.23	CIBIO	MAG	1737927	38	112351	31.22	100	0	0.01	0	0	0	20	NA	GUT_GENOME132205	MGYG-HGUT-02163	d__Archaea;p__Methanobacteriota;c__Methanobacteria;o__Methanobacteriales;f__Methanobacteriaceae;g__Methanobrevibacter_A;s__Methanobrevibacter_A smithii	ERS746950	ERP010700	United Kingdom	Europe
GUT_GENOME258086	XieH_2016__YSZC12003_37208R1__bin.72	CIBIO	MAG	1031215	11	194027	30.77	53.6	0	0.01	0	0	0	12	NA	GUT_GENOME132205	MGYG-HGUT-02163	d__Archaea;p__Methanobacteriota;c__Methanobacteria;o__Methanobacteriales;f__Methanobacteriaceae;g__Methanobrevibacter_A;s__Methanobrevibacter_A smithii	ERS746904	ERP010700	United Kingdom	Europe
GUT_GENOME258129	XieH_2016__YSZC12003_37209__bin.59	CIBIO	MAG	1106281	6	267226	29.96	52.8	0	0.01	0	0	0	13	NA	GUT_GENOME143185	MGYG-HGUT-02446	d__Archaea;p__Methanobacteriota;c__Methanobacteria;o__Methanobacteriales;f__Methanobacteriaceae;g__Methanobrevibacter_A;s__Methanobrevibacter_A smithii_A	ERS746905	ERP010700	United Kingdom	Europe
GUT_GENOME258175	XieH_2016__YSZC12003_37210__bin.55	CIBIO	MAG	1718394	7	278359	31.31	100	0	0	0	0	0	20	NA	GUT_GENOME132205	MGYG-HGUT-02163	d__Archaea;p__Methanobacteriota;c__Methanobacteria;o__Methanobacteriales;f__Methanobacteriaceae;g__Methanobrevibacter_A;s__Methanobrevibacter_A smithii	ERS746803	ERP010700	United Kingdom	Europe
GUT_GENOME258262	XieH_2016__YSZC12003_37223__bin.64	CIBIO	MAG	1517422	78	26246	30.13	52.8	0	0.14	0	0	0	13	NA	GUT_GENOME143185	MGYG-HGUT-02446	d__Archaea;p__Methanobacteriota;c__Methanobacteria;o__Methanobacteriales;f__Methanobacteriaceae;g__Methanobrevibacter_A;s__Methanobrevibacter_A smithii_A	ERS746804	ERP010700	United Kingdom	Europe
GUT_GENOME258265	XieH_2016__YSZC12003_37223__bin.67	CIBIO	MAG	1470551	66	43157	31.04	74.34	0	0.09	0	0	0	16	NA	GUT_GENOME132205	MGYG-HGUT-02163	d__Archaea;p__Methanobacteriota;c__Methanobacteria;o__Methanobacteriales;f__Methanobacteriaceae;g__Methanobrevibacter_A;s__Methanobrevibacter_A smithii	ERS746804	ERP010700	United Kingdom	Europe
GUT_GENOME258332	XieH_2016__YSZC12003_37228__bin.94	CIBIO	MAG	1659775	70	44743	31.33	99.2	0	0.05	0	99.8	99.5	20	NA	GUT_GENOME132205	MGYG-HGUT-02163	d__Archaea;p__Methanobacteriota;c__Methanobacteria;o__Methanobacteriales;f__Methanobacteriaceae;g__Methanobrevibacter_A;s__Methanobrevibacter_A smithii	ERS746873	ERP010700	United Kingdom	Europe
GUT_GENOME258362	XieH_2016__YSZC12003_37229__bin.70	CIBIO	MAG	1783607	13	267846	31.09	100	0	0.01	0	0	0	20	NA	GUT_GENOME132205	MGYG-HGUT-02163	d__Archaea;p__Methanobacteriota;c__Methanobacteria;o__Methanobacteriales;f__Methanobacteriaceae;g__Methanobrevibacter_A;s__Methanobrevibacter_A smithii	ERS746805	ERP010700	United Kingdom	Europe
GUT_GENOME258407	XieH_2016__YSZC12003_37232__bin.58	CIBIO	MAG	1760961	23	101412	30.45	100	0	0.02	0	0	0	20	NA	GUT_GENOME143185	MGYG-HGUT-02446	d__Archaea;p__Methanobacteriota;c__Methanobacteria;o__Methanobacteriales;f__Methanobacteriaceae;g__Methanobrevibacter_A;s__Methanobrevibacter_A smithii_A	ERS746951	ERP010700	United Kingdom	Europe
GUT_GENOME258451	XieH_2016__YSZC12003_37233__bin.29	CIBIO	MAG	1379905	9	322264	31.38	93.6	0	0.01	0	0	0	19	NA	GUT_GENOME132205	MGYG-HGUT-02163	d__Archaea;p__Methanobacteriota;c__Methanobacteria;o__Methanobacteriales;f__Methanobacteriaceae;g__Methanobrevibacter_A;s__Methanobrevibacter_A smithii	ERS746806	ERP010700	United Kingdom	Europe
GUT_GENOME258505	XieH_2016__YSZC12003_37254__bin.59	CIBIO	MAG	1826690	11	292338	30.45	100	0	0.01	0	0	0	20	NA	GUT_GENOME143185	MGYG-HGUT-02446	d__Archaea;p__Methanobacteriota;c__Methanobacteria;o__Methanobacteriales;f__Methanobacteriaceae;g__Methanobrevibacter_A;s__Methanobrevibacter_A smithii_A	ERS746906	ERP010700	United Kingdom	Europe
GUT_GENOME258563	XieH_2016__YSZC12003_37255__bin.69	CIBIO	MAG	1896149	20	157461	30.3	100	0	0.01	0	0	0	20	NA	GUT_GENOME143185	MGYG-HGUT-02446	d__Archaea;p__Methanobacteriota;c__Methanobacteria;o__Methanobacteriales;f__Methanobacteriaceae;g__Methanobrevibacter_A;s__Methanobrevibacter_A smithii_A	ERS746874	ERP010700	United Kingdom	Europe
GUT_GENOME258601	XieH_2016__YSZC12003_37264__bin.56	CIBIO	MAG	1290258	15	138988	30.76	76.8	0	0.01	0	0	0	18	NA	GUT_GENOME143185	MGYG-HGUT-02446	d__Archaea;p__Methanobacteriota;c__Methanobacteria;o__Methanobacteriales;f__Methanobacteriaceae;g__Methanobrevibacter_A;s__Methanobrevibacter_A smithii_A	ERS746875	ERP010700	United Kingdom	Europe
GUT_GENOME258666	XieH_2016__YSZC12003_37265R1__bin.74	CIBIO	MAG	1669837	199	11685	41.49	94.28	2.42	0.04	92.44	0	0	18	NA	GUT_GENOME132202	MGYG-HGUT-02160	d__Archaea;p__Thermoplasmatota;c__Thermoplasmata;o__Methanomassiliicoccales;f__Methanomassiliicoccaceae;g__Methanomassiliicoccus_A;s__Methanomassiliicoccus_A intestinalis	ERS746807	ERP010700	United Kingdom	Europe
GUT_GENOME258730	XieH_2016__YSZC12003_37269__bin.77	CIBIO	MAG	1754264	34	63216	31.09	100	0	0	0	0	0	20	NA	GUT_GENOME132205	MGYG-HGUT-02163	d__Archaea;p__Methanobacteriota;c__Methanobacteria;o__Methanobacteriales;f__Methanobacteriaceae;g__Methanobrevibacter_A;s__Methanobrevibacter_A smithii	ERS746808	ERP010700	United Kingdom	Europe
GUT_GENOME259032	XieH_2016__YSZC12003_37286__bin.66	CIBIO	MAG	1859484	134	21952	30.43	99.6	0	0.02	0	0	99.5	20	NA	GUT_GENOME143185	MGYG-HGUT-02446	d__Archaea;p__Methanobacteriota;c__Methanobacteria;o__Methanobacteriales;f__Methanobacteriaceae;g__Methanobrevibacter_A;s__Methanobrevibacter_A smithii_A	ERS746813	ERP010700	United Kingdom	Europe
GUT_GENOME259041	XieH_2016__YSZC12003_37287__bin.13	CIBIO	MAG	1047237	7	230235	30.88	68.8	0	0.01	0	0	0	16	NA	GUT_GENOME143185	MGYG-HGUT-02446	d__Archaea;p__Methanobacteriota;c__Methanobacteria;o__Methanobacteriales;f__Methanobacteriaceae;g__Methanobrevibacter_A;s__Methanobrevibacter_A smithii_A	ERS746952	ERP010700	United Kingdom	Europe
GUT_GENOME259117	XieH_2016__YSZC12003_37292__bin.6	CIBIO	MAG	1797840	14	176285	31.1	100	0	0.01	0	0	0	20	NA	GUT_GENOME132205	MGYG-HGUT-02163	d__Archaea;p__Methanobacteriota;c__Methanobacteria;o__Methanobacteriales;f__Methanobacteriaceae;g__Methanobrevibacter_A;s__Methanobrevibacter_A smithii	ERS746910	ERP010700	United Kingdom	Europe
GUT_GENOME259221	XieH_2016__YSZC12003_37296R1__bin.75	CIBIO	MAG	1363661	23	99464	30.06	64	0	0.01	0	0	0	19	NA	GUT_GENOME143185	MGYG-HGUT-02446	d__Archaea;p__Methanobacteriota;c__Methanobacteria;o__Methanobacteriales;f__Methanobacteriaceae;g__Methanobrevibacter_A;s__Methanobrevibacter_A smithii_A	ERS746814	ERP010700	United Kingdom	Europe
GUT_GENOME259512	XieH_2016__YSZC12003_37314__bin.83	CIBIO	MAG	1835042	60	52646	30.42	100	0	0.02	0	0	32.94	20	NA	GUT_GENOME143185	MGYG-HGUT-02446	d__Archaea;p__Methanobacteriota;c__Methanobacteria;o__Methanobacteriales;f__Methanobacteriaceae;g__Methanobrevibacter_A;s__Methanobrevibacter_A smithii_A	ERS746912	ERP010700	United Kingdom	Europe
GUT_GENOME259576	XieH_2016__YSZC12003_37315__bin.88	CIBIO	MAG	1657721	21	127535	55.6	98.39	0.81	0	87.39	99.8	99.13	20	NA	GUT_GENOME143252	MGYG-HGUT-02456	d__Archaea;p__Thermoplasmatota;c__Thermoplasmata;o__Methanomassiliicoccales;f__Methanomethylophilaceae;g__Methanomethylophilus;s__Methanomethylophilus alvus	ERS746913	ERP010700	United Kingdom	Europe
GUT_GENOME259597	XieH_2016__YSZC12003_37316__bin.22	CIBIO	MAG	1770837	27	115821	30.97	100	0	0.01	0	0	0	20	NA	GUT_GENOME132205	MGYG-HGUT-02163	d__Archaea;p__Methanobacteriota;c__Methanobacteria;o__Methanobacteriales;f__Methanobacteriaceae;g__Methanobrevibacter_A;s__Methanobrevibacter_A smithii	ERS746820	ERP010700	United Kingdom	Europe
GUT_GENOME259685	XieH_2016__YSZC12003_37322__bin.22	CIBIO	MAG	1218267	27	53006	30.91	71.47	0	0.02	0	99.8	99.5	19	NA	GUT_GENOME143185	MGYG-HGUT-02446	d__Archaea;p__Methanobacteriota;c__Methanobacteria;o__Methanobacteriales;f__Methanobacteriaceae;g__Methanobrevibacter_A;s__Methanobrevibacter_A smithii_A	ERS746821	ERP010700	United Kingdom	Europe
GUT_GENOME259830	XieH_2016__YSZC12003_37331__bin.73	CIBIO	MAG	1816640	14	182127	30.91	100	0	0	0	0	0	20	NA	GUT_GENOME132205	MGYG-HGUT-02163	d__Archaea;p__Methanobacteriota;c__Methanobacteria;o__Methanobacteriales;f__Methanobacteriaceae;g__Methanobrevibacter_A;s__Methanobrevibacter_A smithii	ERS746914	ERP010700	United Kingdom	Europe
GUT_GENOME260030	XieH_2016__YSZC12003_37337__bin.82	CIBIO	MAG	1329911	13	145370	30.64	81.6	0	0.01	0	0	0	18	NA	GUT_GENOME143185	MGYG-HGUT-02446	d__Archaea;p__Methanobacteriota;c__Methanobacteria;o__Methanobacteriales;f__Methanobacteriaceae;g__Methanobrevibacter_A;s__Methanobrevibacter_A smithii_A	ERS746917	ERP010700	United Kingdom	Europe
GUT_GENOME260097	XieH_2016__YSZC12003_37349__bin.39	CIBIO	MAG	1800988	23	209994	30.56	100	0	0.01	0	0	0	20	NA	GUT_GENOME143185	MGYG-HGUT-02446	d__Archaea;p__Methanobacteriota;c__Methanobacteria;o__Methanobacteriales;f__Methanobacteriaceae;g__Methanobrevibacter_A;s__Methanobrevibacter_A smithii_A	ERS746919	ERP010700	United Kingdom	Europe
GUT_GENOME260216	XieH_2016__YSZC12003_37393__bin.28	CIBIO	MAG	1722668	172	17495	31.17	98.4	1.6	0.46	0	0	0	20	NA	GUT_GENOME132205	MGYG-HGUT-02163	d__Archaea;p__Methanobacteriota;c__Methanobacteria;o__Methanobacteriales;f__Methanobacteriaceae;g__Methanobrevibacter_A;s__Methanobrevibacter_A smithii	ERS746956	ERP010700	United Kingdom	Europe
GUT_GENOME260499	XieH_2016__YSZC12003_37462__bin.35	CIBIO	MAG	1771604	21	133238	30.48	100	0	0.01	0	0	0	20	NA	GUT_GENOME143185	MGYG-HGUT-02446	d__Archaea;p__Methanobacteriota;c__Methanobacteria;o__Methanobacteriales;f__Methanobacteriaceae;g__Methanobrevibacter_A;s__Methanobrevibacter_A smithii_A	ERS746827	ERP010700	United Kingdom	Europe
GUT_GENOME260613	XieH_2016__YSZC12003_37545__bin.55	CIBIO	MAG	1751223	73	43041	30.43	99.6	0	0.02	0	0	0	20	NA	GUT_GENOME143185	MGYG-HGUT-02446	d__Archaea;p__Methanobacteriota;c__Methanobacteria;o__Methanobacteriales;f__Methanobacteriaceae;g__Methanobrevibacter_A;s__Methanobrevibacter_A smithii_A	ERS746926	ERP010700	United Kingdom	Europe
GUT_GENOME260847	XieH_2016__YSZC12003_37651__bin.27	CIBIO	MAG	1833839	23	147602	31.11	100	0	0.01	0	0	0	20	NA	GUT_GENOME132205	MGYG-HGUT-02163	d__Archaea;p__Methanobacteriota;c__Methanobacteria;o__Methanobacteriales;f__Methanobacteriaceae;g__Methanobrevibacter_A;s__Methanobrevibacter_A smithii	ERS746932	ERP010700	United Kingdom	Europe
GUT_GENOME260946	XieH_2016__YSZC12003_37753__bin.4	CIBIO	MAG	1924783	29	110034	30.22	100	0	0.01	0	0	0	20	NA	GUT_GENOME143185	MGYG-HGUT-02446	d__Archaea;p__Methanobacteriota;c__Methanobacteria;o__Methanobacteriales;f__Methanobacteriaceae;g__Methanobrevibacter_A;s__Methanobrevibacter_A smithii_A	ERS746934	ERP010700	United Kingdom	Europe
GUT_GENOME261111	XieH_2016__YSZC12003_37798__bin.72	CIBIO	MAG	1720646	36	97249	31.17	100	0	0.01	0	0	0	20	NA	GUT_GENOME132205	MGYG-HGUT-02163	d__Archaea;p__Methanobacteriota;c__Methanobacteria;o__Methanobacteriales;f__Methanobacteriaceae;g__Methanobrevibacter_A;s__Methanobrevibacter_A smithii	ERS746935	ERP010700	United Kingdom	Europe
GUT_GENOME261183	XieH_2016__YSZC12003_37830__bin.26	CIBIO	MAG	1706815	162	15775	31.36	100	0.8	0.01	0	0	0	20	NA	GUT_GENOME132205	MGYG-HGUT-02163	d__Archaea;p__Methanobacteriota;c__Methanobacteria;o__Methanobacteriales;f__Methanobacteriaceae;g__Methanobrevibacter_A;s__Methanobrevibacter_A smithii	ERS746829	ERP010700	United Kingdom	Europe
GUT_GENOME261378	YuJ_2015__SZAXPI003409-8__bin.32	CIBIO	MAG	1601068	76	31405	31.85	97.6	0.8	0.19	0	0	0	18	NA	GUT_GENOME014311	MGYG-HGUT-00522	d__Archaea;p__Methanobacteriota;c__Methanobacteria;o__Methanobacteriales;f__Methanobacteriaceae;g__Methanobrevibacter_A;s__	NA	NA	China	Asia
GUT_GENOME261442	YuJ_2015__SZAXPI003411-6__bin.12	CIBIO	MAG	1760390	30	106503	31.14	100	0	0.08	0	0	0	20	NA	GUT_GENOME132205	MGYG-HGUT-02163	d__Archaea;p__Methanobacteriota;c__Methanobacteria;o__Methanobacteriales;f__Methanobacteriaceae;g__Methanobrevibacter_A;s__Methanobrevibacter_A smithii	NA	NA	China	Asia
GUT_GENOME261695	YuJ_2015__SZAXPI003420-4__bin.63	CIBIO	MAG	1799694	40	66608	31.11	100	0	0.05	0	0	0	20	NA	GUT_GENOME132205	MGYG-HGUT-02163	d__Archaea;p__Methanobacteriota;c__Methanobacteria;o__Methanobacteriales;f__Methanobacteriaceae;g__Methanobrevibacter_A;s__Methanobrevibacter_A smithii	NA	NA	China	Asia
GUT_GENOME262284	YuJ_2015__SZAXPI015217-140__bin.37	CIBIO	MAG	1813720	64	45931	31.04	100	0	0.05	0	99.8	0	20	NA	GUT_GENOME132205	MGYG-HGUT-02163	d__Archaea;p__Methanobacteriota;c__Methanobacteria;o__Methanobacteriales;f__Methanobacteriaceae;g__Methanobrevibacter_A;s__Methanobrevibacter_A smithii	NA	NA	China	Asia
GUT_GENOME262465	YuJ_2015__SZAXPI015223-158__bin.53	CIBIO	MAG	1909796	131	28139	30.97	98.4	1.6	0.07	0	99.8	99.5	20	NA	GUT_GENOME132205	MGYG-HGUT-02163	d__Archaea;p__Methanobacteriota;c__Methanobacteria;o__Methanobacteriales;f__Methanobacteriaceae;g__Methanobrevibacter_A;s__Methanobrevibacter_A smithii	NA	NA	China	Asia
GUT_GENOME262640	YuJ_2015__SZAXPI015230-16__bin.51	CIBIO	MAG	1025169	298	3716	32.01	75.52	0	0.26	0	0	0	11	NA	GUT_GENOME132205	MGYG-HGUT-02163	d__Archaea;p__Methanobacteriota;c__Methanobacteria;o__Methanobacteriales;f__Methanobacteriaceae;g__Methanobrevibacter_A;s__Methanobrevibacter_A smithii	NA	NA	China	Asia
GUT_GENOME263468	YuJ_2015__SZAXPI015264-87__bin.27	CIBIO	MAG	1610769	14	366285	29.68	100	0	0.03	0	0	0	20	NA	GUT_GENOME263468	MGYG-HGUT-04283	d__Archaea;p__Methanobacteriota;c__Methanobacteria;o__Methanobacteriales;f__Methanobacteriaceae;g__Methanobrevibacter_A;s__Methanobrevibacter_A woesei	NA	NA	China	Asia
GUT_GENOME263606	YuJ_2015__SZAXPI015268-109__bin.7	CIBIO	MAG	1586654	49	62512	31.43	99.2	0	0.08	0	0	0	20	NA	GUT_GENOME132205	MGYG-HGUT-02163	d__Archaea;p__Methanobacteriota;c__Methanobacteria;o__Methanobacteriales;f__Methanobacteriaceae;g__Methanobrevibacter_A;s__Methanobrevibacter_A smithii	NA	NA	China	Asia
GUT_GENOME263902	YuJ_2015__SZAXPI017457-24__bin.35	CIBIO	MAG	1712604	33	64625	31.15	96.8	0	0.05	0	0	0	20	NA	GUT_GENOME132205	MGYG-HGUT-02163	d__Archaea;p__Methanobacteriota;c__Methanobacteria;o__Methanobacteriales;f__Methanobacteriaceae;g__Methanobrevibacter_A;s__Methanobrevibacter_A smithii	NA	NA	China	Asia
GUT_GENOME264015	YuJ_2015__SZAXPI017463-36__bin.10	CIBIO	MAG	1863535	26	118676	31.17	100	0	0.06	0	0	0	20	NA	GUT_GENOME132205	MGYG-HGUT-02163	d__Archaea;p__Methanobacteriota;c__Methanobacteria;o__Methanobacteriales;f__Methanobacteriaceae;g__Methanobrevibacter_A;s__Methanobrevibacter_A smithii	NA	NA	China	Asia
GUT_GENOME264147	YuJ_2015__SZAXPI017581-93__bin.23	CIBIO	MAG	1519580	241	8562	31.87	98.74	0	0.16	0	99.8	99.5	10	NA	GUT_GENOME014311	MGYG-HGUT-00522	d__Archaea;p__Methanobacteriota;c__Methanobacteria;o__Methanobacteriales;f__Methanobacteriaceae;g__Methanobrevibacter_A;s__	NA	NA	China	Asia
GUT_GENOME264533	ZeeviD_2015__PNP_DietIntervention_11__bin.9	CIBIO	MAG	2123896	287	11300	31.11	98.93	0.8	0.04	0	0	0	16	NA	GUT_GENOME132205	MGYG-HGUT-02163	d__Archaea;p__Methanobacteriota;c__Methanobacteria;o__Methanobacteriales;f__Methanobacteriaceae;g__Methanobrevibacter_A;s__Methanobrevibacter_A smithii	ERS972449	ERP012929	Israel	Asia
GUT_GENOME264551	ZeeviD_2015__PNP_DietIntervention_14__bin.26	CIBIO	MAG	1463584	19	113049	31.24	93.6	0	0	0	0	0	19	NA	GUT_GENOME132205	MGYG-HGUT-02163	d__Archaea;p__Methanobacteriota;c__Methanobacteria;o__Methanobacteriales;f__Methanobacteriaceae;g__Methanobrevibacter_A;s__Methanobrevibacter_A smithii	ERS972452	ERP012929	Israel	Asia
GUT_GENOME264594	ZeeviD_2015__PNP_DietIntervention_20__bin.2	CIBIO	MAG	1521325	320	6050	31.01	86.71	2.53	0.03	0	0	0	16	NA	GUT_GENOME132205	MGYG-HGUT-02163	d__Archaea;p__Methanobacteriota;c__Methanobacteria;o__Methanobacteriales;f__Methanobacteriaceae;g__Methanobrevibacter_A;s__Methanobrevibacter_A smithii	ERS972458	ERP012929	Israel	Asia
GUT_GENOME264609	ZeeviD_2015__PNP_DietIntervention_21__bin.1	CIBIO	MAG	2291583	794	2999	31.46	72.13	2.44	0.12	0	97.83	0	16	NA	GUT_GENOME132205	MGYG-HGUT-02163	d__Archaea;p__Methanobacteriota;c__Methanobacteria;o__Methanobacteriales;f__Methanobacteriaceae;g__Methanobrevibacter_A;s__Methanobrevibacter_A smithii	ERS972459	ERP012929	Israel	Asia
GUT_GENOME264666	ZeeviD_2015__PNP_DietIntervention_27__bin.9	CIBIO	MAG	1141242	455	2492	29.89	53.43	0	0.09	0	0	0	11	NA	GUT_GENOME143185	MGYG-HGUT-02446	d__Archaea;p__Methanobacteriota;c__Methanobacteria;o__Methanobacteriales;f__Methanobacteriaceae;g__Methanobrevibacter_A;s__Methanobrevibacter_A smithii_A	ERS972465	ERP012929	Israel	Asia
GUT_GENOME264697	ZeeviD_2015__PNP_DietIntervention_28__bin.77	CIBIO	MAG	1540389	16	168946	31.32	92	0	0	0	0	0	20	NA	GUT_GENOME132205	MGYG-HGUT-02163	d__Archaea;p__Methanobacteriota;c__Methanobacteria;o__Methanobacteriales;f__Methanobacteriaceae;g__Methanobrevibacter_A;s__Methanobrevibacter_A smithii	ERS972466	ERP012929	Israel	Asia
GUT_GENOME265025	ZeeviD_2015__PNP_DietIntervention_46__bin.12	CIBIO	MAG	1758278	78	38319	31.15	98.4	0.27	0.01	0	0	0	19	NA	GUT_GENOME132205	MGYG-HGUT-02163	d__Archaea;p__Methanobacteriota;c__Methanobacteria;o__Methanobacteriales;f__Methanobacteriaceae;g__Methanobrevibacter_A;s__Methanobrevibacter_A smithii	ERS972484	ERP012929	Israel	Asia
GUT_GENOME265207	ZeeviD_2015__PNP_DietIntervention_8__bin.60	CIBIO	MAG	1667226	18	168946	31.24	100	0	0	0	0	0	20	NA	GUT_GENOME132205	MGYG-HGUT-02163	d__Archaea;p__Methanobacteriota;c__Methanobacteria;o__Methanobacteriales;f__Methanobacteriaceae;g__Methanobrevibacter_A;s__Methanobrevibacter_A smithii	ERS972446	ERP012929	Israel	Asia
GUT_GENOME265386	ZeeviD_2015__PNP_Main_107__bin.38	CIBIO	MAG	1537237	37	88672	31.31	97.47	0.4	0.01	0	0	0	20	NA	GUT_GENOME132205	MGYG-HGUT-02163	d__Archaea;p__Methanobacteriota;c__Methanobacteria;o__Methanobacteriales;f__Methanobacteriaceae;g__Methanobrevibacter_A;s__Methanobrevibacter_A smithii	ERS971745	ERP012929	Israel	Asia
GUT_GENOME265514	ZeeviD_2015__PNP_Main_113__bin.34	CIBIO	MAG	1717401	24	137658	31.1	100	0	0.01	0	0	0	20	NA	GUT_GENOME132205	MGYG-HGUT-02163	d__Archaea;p__Methanobacteriota;c__Methanobacteria;o__Methanobacteriales;f__Methanobacteriaceae;g__Methanobrevibacter_A;s__Methanobrevibacter_A smithii	ERS971751	ERP012929	Israel	Asia
GUT_GENOME265602	ZeeviD_2015__PNP_Main_116__bin.37	CIBIO	MAG	1728360	37	103741	30.96	99.2	1.2	0.01	0	7.31	0	20	NA	GUT_GENOME132205	MGYG-HGUT-02163	d__Archaea;p__Methanobacteriota;c__Methanobacteria;o__Methanobacteriales;f__Methanobacteriaceae;g__Methanobrevibacter_A;s__Methanobrevibacter_A smithii	ERS971754	ERP012929	Israel	Asia
GUT_GENOME265722	ZeeviD_2015__PNP_Main_121__bin.25	CIBIO	MAG	1744390	55	63864	30.38	96	0.27	0.02	0	0	0	20	NA	GUT_GENOME143185	MGYG-HGUT-02446	d__Archaea;p__Methanobacteriota;c__Methanobacteria;o__Methanobacteriales;f__Methanobacteriaceae;g__Methanobrevibacter_A;s__Methanobrevibacter_A smithii_A	ERS971759	ERP012929	Israel	Asia
GUT_GENOME265776	ZeeviD_2015__PNP_Main_123__bin.23	CIBIO	MAG	1687067	52	66232	31.25	100	0	0	0	99.8	99.5	20	NA	GUT_GENOME132205	MGYG-HGUT-02163	d__Archaea;p__Methanobacteriota;c__Methanobacteria;o__Methanobacteriales;f__Methanobacteriaceae;g__Methanobrevibacter_A;s__Methanobrevibacter_A smithii	ERS971761	ERP012929	Israel	Asia
GUT_GENOME265890	ZeeviD_2015__PNP_Main_127__bin.83	CIBIO	MAG	1647524	37	69689	27.47	97.6	0	0	0	0	0	20	NA	GUT_GENOME132206	MGYG-HGUT-02164	d__Archaea;p__Methanobacteriota;c__Methanobacteria;o__Methanobacteriales;f__Methanobacteriaceae;g__Methanosphaera;s__Methanosphaera stadtmanae	ERS971765	ERP012929	Israel	Asia
GUT_GENOME265980	ZeeviD_2015__PNP_Main_131__bin.38	CIBIO	MAG	1607570	61	55363	27.42	87.2	0.8	0.02	0	7.31	0	19	NA	GUT_GENOME132206	MGYG-HGUT-02164	d__Archaea;p__Methanobacteriota;c__Methanobacteria;o__Methanobacteriales;f__Methanobacteriaceae;g__Methanosphaera;s__Methanosphaera stadtmanae	ERS971769	ERP012929	Israel	Asia
GUT_GENOME265981	ZeeviD_2015__PNP_Main_131__bin.40	CIBIO	MAG	1814435	34	70605	31.18	100	0	0.01	0	0	0	20	NA	GUT_GENOME132205	MGYG-HGUT-02163	d__Archaea;p__Methanobacteriota;c__Methanobacteria;o__Methanobacteriales;f__Methanobacteriaceae;g__Methanobrevibacter_A;s__Methanobrevibacter_A smithii	ERS971769	ERP012929	Israel	Asia
GUT_GENOME266012	ZeeviD_2015__PNP_Main_132__bin.39	CIBIO	MAG	1628486	105	24248	31.43	96.8	0	0.18	0	0	5.22	20	NA	GUT_GENOME132205	MGYG-HGUT-02163	d__Archaea;p__Methanobacteriota;c__Methanobacteria;o__Methanobacteriales;f__Methanobacteriaceae;g__Methanobrevibacter_A;s__Methanobrevibacter_A smithii	ERS971770	ERP012929	Israel	Asia
GUT_GENOME266038	ZeeviD_2015__PNP_Main_133__bin.32	CIBIO	MAG	1787155	155	16603	41.05	96.37	2.46	0.02	94.12	99.86	57.42	20	NA	GUT_GENOME266038	MGYG-HGUT-04312	d__Archaea;p__Thermoplasmatota;c__Thermoplasmata;o__Methanomassiliicoccales;f__Methanomassiliicoccaceae;g__Methanomassiliicoccus_A;s__	ERS971771	ERP012929	Israel	Asia
GUT_GENOME266053	ZeeviD_2015__PNP_Main_133__bin.55	CIBIO	MAG	1727153	18	132242	31.11	100	0	0.01	0	0	0	20	NA	GUT_GENOME132205	MGYG-HGUT-02163	d__Archaea;p__Methanobacteriota;c__Methanobacteria;o__Methanobacteriales;f__Methanobacteriaceae;g__Methanobrevibacter_A;s__Methanobrevibacter_A smithii	ERS971771	ERP012929	Israel	Asia
GUT_GENOME266067	ZeeviD_2015__PNP_Main_134__bin.28	CIBIO	MAG	1685077	24	104111	31.11	100	0	0.01	0	0	0	20	NA	GUT_GENOME132205	MGYG-HGUT-02163	d__Archaea;p__Methanobacteriota;c__Methanobacteria;o__Methanobacteriales;f__Methanobacteriaceae;g__Methanobrevibacter_A;s__Methanobrevibacter_A smithii	ERS971772	ERP012929	Israel	Asia
GUT_GENOME266089	ZeeviD_2015__PNP_Main_135__bin.25	CIBIO	MAG	1204838	6	219641	31.29	75.2	0	0	0	0	0	17	NA	GUT_GENOME132205	MGYG-HGUT-02163	d__Archaea;p__Methanobacteriota;c__Methanobacteria;o__Methanobacteriales;f__Methanobacteriaceae;g__Methanobrevibacter_A;s__Methanobrevibacter_A smithii	ERS971773	ERP012929	Israel	Asia
GUT_GENOME266145	ZeeviD_2015__PNP_Main_137__bin.18	CIBIO	MAG	1818732	25	113818	31.12	100	0	0	0	0	0	20	NA	GUT_GENOME132205	MGYG-HGUT-02163	d__Archaea;p__Methanobacteriota;c__Methanobacteria;o__Methanobacteriales;f__Methanobacteriaceae;g__Methanobrevibacter_A;s__Methanobrevibacter_A smithii	ERS971775	ERP012929	Israel	Asia
GUT_GENOME266241	ZeeviD_2015__PNP_Main_140__bin.15	CIBIO	MAG	1342889	16	113816	30.87	64.8	0	0	0	0	0	15	NA	GUT_GENOME132205	MGYG-HGUT-02163	d__Archaea;p__Methanobacteriota;c__Methanobacteria;o__Methanobacteriales;f__Methanobacteriaceae;g__Methanobrevibacter_A;s__Methanobrevibacter_A smithii	ERS971778	ERP012929	Israel	Asia
GUT_GENOME266466	ZeeviD_2015__PNP_Main_148__bin.31	CIBIO	MAG	1748620	33	110301	31.02	99.2	0	0.01	0	0	0	20	NA	GUT_GENOME132205	MGYG-HGUT-02163	d__Archaea;p__Methanobacteriota;c__Methanobacteria;o__Methanobacteriales;f__Methanobacteriaceae;g__Methanobrevibacter_A;s__Methanobrevibacter_A smithii	ERS971786	ERP012929	Israel	Asia
GUT_GENOME266751	ZeeviD_2015__PNP_Main_158__bin.61	CIBIO	MAG	1726176	18	131311	31	100	0	0	0	0	0	20	NA	GUT_GENOME132205	MGYG-HGUT-02163	d__Archaea;p__Methanobacteriota;c__Methanobacteria;o__Methanobacteriales;f__Methanobacteriaceae;g__Methanobrevibacter_A;s__Methanobrevibacter_A smithii	ERS971796	ERP012929	Israel	Asia
GUT_GENOME266824	ZeeviD_2015__PNP_Main_161__bin.35	CIBIO	MAG	1673324	46	66528	31.12	97.35	0	0	0	0	0	20	NA	GUT_GENOME132205	MGYG-HGUT-02163	d__Archaea;p__Methanobacteriota;c__Methanobacteria;o__Methanobacteriales;f__Methanobacteriaceae;g__Methanobrevibacter_A;s__Methanobrevibacter_A smithii	ERS971799	ERP012929	Israel	Asia
GUT_GENOME266927	ZeeviD_2015__PNP_Main_166__bin.3	CIBIO	MAG	1762699	73	48549	31.04	100	0	0.01	0	0	0	20	NA	GUT_GENOME132205	MGYG-HGUT-02163	d__Archaea;p__Methanobacteriota;c__Methanobacteria;o__Methanobacteriales;f__Methanobacteriaceae;g__Methanobrevibacter_A;s__Methanobrevibacter_A smithii	ERS971804	ERP012929	Israel	Asia
GUT_GENOME267102	ZeeviD_2015__PNP_Main_172__bin.63	CIBIO	MAG	1863759	20	146969	30.34	100	0	0	0	0	0	20	NA	GUT_GENOME143185	MGYG-HGUT-02446	d__Archaea;p__Methanobacteriota;c__Methanobacteria;o__Methanobacteriales;f__Methanobacteriaceae;g__Methanobrevibacter_A;s__Methanobrevibacter_A smithii_A	ERS971810	ERP012929	Israel	Asia
GUT_GENOME267238	ZeeviD_2015__PNP_Main_178__bin.48	CIBIO	MAG	1783658	16	196396	31.08	100	0	0.01	0	0	0	20	NA	GUT_GENOME132205	MGYG-HGUT-02163	d__Archaea;p__Methanobacteriota;c__Methanobacteria;o__Methanobacteriales;f__Methanobacteriaceae;g__Methanobrevibacter_A;s__Methanobrevibacter_A smithii	ERS971816	ERP012929	Israel	Asia
GUT_GENOME267332	ZeeviD_2015__PNP_Main_181__bin.43	CIBIO	MAG	1677059	179	15185	30.59	93.6	0.4	0.04	0	99.8	0	20	NA	GUT_GENOME143185	MGYG-HGUT-02446	d__Archaea;p__Methanobacteriota;c__Methanobacteria;o__Methanobacteriales;f__Methanobacteriaceae;g__Methanobrevibacter_A;s__Methanobrevibacter_A smithii_A	ERS971819	ERP012929	Israel	Asia
GUT_GENOME267347	ZeeviD_2015__PNP_Main_182__bin.2	CIBIO	MAG	1856983	47	85001	30.35	100	0	0.01	0	99.8	22.24	20	NA	GUT_GENOME143185	MGYG-HGUT-02446	d__Archaea;p__Methanobacteriota;c__Methanobacteria;o__Methanobacteriales;f__Methanobacteriaceae;g__Methanobrevibacter_A;s__Methanobrevibacter_A smithii_A	ERS971820	ERP012929	Israel	Asia
GUT_GENOME267364	ZeeviD_2015__PNP_Main_183__bin.22	CIBIO	MAG	1609924	92	25403	31.33	99.79	1.6	0.01	0	0	0	20	NA	GUT_GENOME132205	MGYG-HGUT-02163	d__Archaea;p__Methanobacteriota;c__Methanobacteria;o__Methanobacteriales;f__Methanobacteriaceae;g__Methanobrevibacter_A;s__Methanobrevibacter_A smithii	ERS971821	ERP012929	Israel	Asia
GUT_GENOME267524	ZeeviD_2015__PNP_Main_18__bin.22	CIBIO	MAG	1847128	235	10908	30.41	97.2	1.66	0.03	0	99.8	99.5	16	NA	GUT_GENOME143185	MGYG-HGUT-02446	d__Archaea;p__Methanobacteriota;c__Methanobacteria;o__Methanobacteriales;f__Methanobacteriaceae;g__Methanobrevibacter_A;s__Methanobrevibacter_A smithii_A	ERS971656	ERP012929	Israel	Asia
GUT_GENOME267539	ZeeviD_2015__PNP_Main_190__bin.11	CIBIO	MAG	1656300	287	7009	31.05	88.4	0.98	0.06	0	0	0	20	NA	GUT_GENOME132205	MGYG-HGUT-02163	d__Archaea;p__Methanobacteriota;c__Methanobacteria;o__Methanobacteriales;f__Methanobacteriaceae;g__Methanobrevibacter_A;s__Methanobrevibacter_A smithii	ERS971828	ERP012929	Israel	Asia
GUT_GENOME267649	ZeeviD_2015__PNP_Main_195__bin.55	CIBIO	MAG	1722598	25	114251	31.11	100	0	0	0	0	0	20	NA	GUT_GENOME132205	MGYG-HGUT-02163	d__Archaea;p__Methanobacteriota;c__Methanobacteria;o__Methanobacteriales;f__Methanobacteriaceae;g__Methanobrevibacter_A;s__Methanobrevibacter_A smithii	ERS971833	ERP012929	Israel	Asia
GUT_GENOME267746	ZeeviD_2015__PNP_Main_19__bin.13	CIBIO	MAG	1757108	21	142718	31	100	0	0.01	0	0	0	20	NA	GUT_GENOME132205	MGYG-HGUT-02163	d__Archaea;p__Methanobacteriota;c__Methanobacteria;o__Methanobacteriales;f__Methanobacteriaceae;g__Methanobrevibacter_A;s__Methanobrevibacter_A smithii	ERS971657	ERP012929	Israel	Asia
GUT_GENOME267983	ZeeviD_2015__PNP_Main_209__bin.56	CIBIO	MAG	1714129	24	112168	31.18	100	0	0.01	0	0	0	20	NA	GUT_GENOME132205	MGYG-HGUT-02163	d__Archaea;p__Methanobacteriota;c__Methanobacteria;o__Methanobacteriales;f__Methanobacteriaceae;g__Methanobrevibacter_A;s__Methanobrevibacter_A smithii	ERS971847	ERP012929	Israel	Asia
GUT_GENOME268063	ZeeviD_2015__PNP_Main_212__bin.13	CIBIO	MAG	1835472	36	104261	31.03	100	0	0.01	0	0	0	20	NA	GUT_GENOME132205	MGYG-HGUT-02163	d__Archaea;p__Methanobacteriota;c__Methanobacteria;o__Methanobacteriales;f__Methanobacteriaceae;g__Methanobrevibacter_A;s__Methanobrevibacter_A smithii	ERS971850	ERP012929	Israel	Asia
GUT_GENOME268116	ZeeviD_2015__PNP_Main_213__bin.69	CIBIO	MAG	1646432	17	167616	31.23	97.6	0	0	0	0	0	20	NA	GUT_GENOME132205	MGYG-HGUT-02163	d__Archaea;p__Methanobacteriota;c__Methanobacteria;o__Methanobacteriales;f__Methanobacteriaceae;g__Methanobrevibacter_A;s__Methanobrevibacter_A smithii	ERS971851	ERP012929	Israel	Asia
GUT_GENOME268176	ZeeviD_2015__PNP_Main_215__bin.9	CIBIO	MAG	1818434	37	93805	31.06	100	0	0.01	0	0	0	20	NA	GUT_GENOME132205	MGYG-HGUT-02163	d__Archaea;p__Methanobacteriota;c__Methanobacteria;o__Methanobacteriales;f__Methanobacteriaceae;g__Methanobrevibacter_A;s__Methanobrevibacter_A smithii	ERS971853	ERP012929	Israel	Asia
GUT_GENOME268185	ZeeviD_2015__PNP_Main_216__bin.24	CIBIO	MAG	1740039	68	45987	31.14	100	4.62	0.01	0	0	0	18	NA	GUT_GENOME132205	MGYG-HGUT-02163	d__Archaea;p__Methanobacteriota;c__Methanobacteria;o__Methanobacteriales;f__Methanobacteriaceae;g__Methanobrevibacter_A;s__Methanobrevibacter_A smithii	ERS971854	ERP012929	Israel	Asia
GUT_GENOME268378	ZeeviD_2015__PNP_Main_223__bin.22	CIBIO	MAG	1699785	23	110755	31.09	100	0	0	0	0	0	20	NA	GUT_GENOME132205	MGYG-HGUT-02163	d__Archaea;p__Methanobacteriota;c__Methanobacteria;o__Methanobacteriales;f__Methanobacteriaceae;g__Methanobrevibacter_A;s__Methanobrevibacter_A smithii	ERS971861	ERP012929	Israel	Asia
GUT_GENOME268434	ZeeviD_2015__PNP_Main_225__bin.11	CIBIO	MAG	1737431	18	185957	31.1	100	0	0	0	0	0	20	NA	GUT_GENOME132205	MGYG-HGUT-02163	d__Archaea;p__Methanobacteriota;c__Methanobacteria;o__Methanobacteriales;f__Methanobacteriaceae;g__Methanobrevibacter_A;s__Methanobrevibacter_A smithii	ERS971863	ERP012929	Israel	Asia
GUT_GENOME268463	ZeeviD_2015__PNP_Main_225__bin.8	CIBIO	MAG	1713743	103	22197	58.7	96.1	0.81	0.02	86.55	0	0	20	NA	GUT_GENOME268463	MGYG-HGUT-04339	d__Archaea;p__Thermoplasmatota;c__Thermoplasmata;o__Methanomassiliicoccales;f__Methanomethylophilaceae;g__UBA71;s__	ERS971863	ERP012929	Israel	Asia
GUT_GENOME268467	ZeeviD_2015__PNP_Main_226__bin.17	CIBIO	MAG	1747953	39	139309	31.08	100	0	0.02	0	0	7.02	20	NA	GUT_GENOME132205	MGYG-HGUT-02163	d__Archaea;p__Methanobacteriota;c__Methanobacteria;o__Methanobacteriales;f__Methanobacteriaceae;g__Methanobrevibacter_A;s__Methanobrevibacter_A smithii	ERS971864	ERP012929	Israel	Asia
GUT_GENOME268740	ZeeviD_2015__PNP_Main_238__bin.20	CIBIO	MAG	1726636	20	142723	31.08	100	0	0.01	0	0	0	20	NA	GUT_GENOME132205	MGYG-HGUT-02163	d__Archaea;p__Methanobacteriota;c__Methanobacteria;o__Methanobacteriales;f__Methanobacteriaceae;g__Methanobrevibacter_A;s__Methanobrevibacter_A smithii	ERS971876	ERP012929	Israel	Asia
GUT_GENOME268814	ZeeviD_2015__PNP_Main_23__bin.74	CIBIO	MAG	1748195	22	202380	31.13	100	0	0	0	0	0	20	NA	GUT_GENOME132205	MGYG-HGUT-02163	d__Archaea;p__Methanobacteriota;c__Methanobacteria;o__Methanobacteriales;f__Methanobacteriaceae;g__Methanobrevibacter_A;s__Methanobrevibacter_A smithii	ERS971661	ERP012929	Israel	Asia
GUT_GENOME268984	ZeeviD_2015__PNP_Main_246__bin.64	CIBIO	MAG	1368699	159	13985	31.59	87.75	0	0.01	0	0	0	19	NA	GUT_GENOME132205	MGYG-HGUT-02163	d__Archaea;p__Methanobacteriota;c__Methanobacteria;o__Methanobacteriales;f__Methanobacteriaceae;g__Methanobrevibacter_A;s__Methanobrevibacter_A smithii	ERS971884	ERP012929	Israel	Asia
GUT_GENOME268997	ZeeviD_2015__PNP_Main_247__bin.26	CIBIO	MAG	1678976	14	143434	31.22	100	0	0	0	0	0	20	NA	GUT_GENOME132205	MGYG-HGUT-02163	d__Archaea;p__Methanobacteriota;c__Methanobacteria;o__Methanobacteriales;f__Methanobacteriaceae;g__Methanobrevibacter_A;s__Methanobrevibacter_A smithii	ERS971885	ERP012929	Israel	Asia
GUT_GENOME269048	ZeeviD_2015__PNP_Main_24__bin.26	CIBIO	MAG	1807095	35	101567	30.97	100	0.8	0	0	0	0	20	NA	GUT_GENOME132205	MGYG-HGUT-02163	d__Archaea;p__Methanobacteriota;c__Methanobacteria;o__Methanobacteriales;f__Methanobacteriaceae;g__Methanobrevibacter_A;s__Methanobrevibacter_A smithii	ERS971662	ERP012929	Israel	Asia
GUT_GENOME269126	ZeeviD_2015__PNP_Main_252__bin.48	CIBIO	MAG	1235523	8	168986	31.43	84	0	0	0	0	0	18	NA	GUT_GENOME132205	MGYG-HGUT-02163	d__Archaea;p__Methanobacteriota;c__Methanobacteria;o__Methanobacteriales;f__Methanobacteriaceae;g__Methanobrevibacter_A;s__Methanobrevibacter_A smithii	ERS971890	ERP012929	Israel	Asia
GUT_GENOME269174	ZeeviD_2015__PNP_Main_255__bin.17	CIBIO	MAG	1764607	28	130780	31.11	100	0	0	0	0	0	20	NA	GUT_GENOME132205	MGYG-HGUT-02163	d__Archaea;p__Methanobacteriota;c__Methanobacteria;o__Methanobacteriales;f__Methanobacteriaceae;g__Methanobrevibacter_A;s__Methanobrevibacter_A smithii	ERS971893	ERP012929	Israel	Asia
GUT_GENOME269219	ZeeviD_2015__PNP_Main_256__bin.49	CIBIO	MAG	1771033	24	130014	31.01	100	0	0	0	0	0	20	NA	GUT_GENOME132205	MGYG-HGUT-02163	d__Archaea;p__Methanobacteriota;c__Methanobacteria;o__Methanobacteriales;f__Methanobacteriaceae;g__Methanobrevibacter_A;s__Methanobrevibacter_A smithii	ERS971894	ERP012929	Israel	Asia
GUT_GENOME269234	ZeeviD_2015__PNP_Main_257__bin.13	CIBIO	MAG	1792569	210	12834	30.78	96.8	2.45	0.02	0	84.29	81.57	19	NA	GUT_GENOME132205	MGYG-HGUT-02163	d__Archaea;p__Methanobacteriota;c__Methanobacteria;o__Methanobacteriales;f__Methanobacteriaceae;g__Methanobrevibacter_A;s__Methanobrevibacter_A smithii	ERS971895	ERP012929	Israel	Asia
GUT_GENOME269281	ZeeviD_2015__PNP_Main_259__bin.9	CIBIO	MAG	1784577	32	90114	31.07	100	0	0.01	0	0	0	20	NA	GUT_GENOME132205	MGYG-HGUT-02163	d__Archaea;p__Methanobacteriota;c__Methanobacteria;o__Methanobacteriales;f__Methanobacteriaceae;g__Methanobrevibacter_A;s__Methanobrevibacter_A smithii	ERS971897	ERP012929	Israel	Asia
GUT_GENOME269311	ZeeviD_2015__PNP_Main_25__bin.76	CIBIO	MAG	1704602	38	104621	31.19	100	0	0.01	0	0	0	20	NA	GUT_GENOME132205	MGYG-HGUT-02163	d__Archaea;p__Methanobacteriota;c__Methanobacteria;o__Methanobacteriales;f__Methanobacteriaceae;g__Methanobrevibacter_A;s__Methanobrevibacter_A smithii	ERS971663	ERP012929	Israel	Asia
GUT_GENOME269323	ZeeviD_2015__PNP_Main_260__bin.18	CIBIO	MAG	1214919	10	145693	31.49	78.4	0	0	0	0	0	18	NA	GUT_GENOME132205	MGYG-HGUT-02163	d__Archaea;p__Methanobacteriota;c__Methanobacteria;o__Methanobacteriales;f__Methanobacteriaceae;g__Methanobrevibacter_A;s__Methanobrevibacter_A smithii	ERS971898	ERP012929	Israel	Asia
GUT_GENOME269576	ZeeviD_2015__PNP_Main_271__bin.18	CIBIO	MAG	1581699	194	11429	31.38	96	3.2	0.01	0	0	0	20	NA	GUT_GENOME132205	MGYG-HGUT-02163	d__Archaea;p__Methanobacteriota;c__Methanobacteria;o__Methanobacteriales;f__Methanobacteriaceae;g__Methanobrevibacter_A;s__Methanobrevibacter_A smithii	ERS971909	ERP012929	Israel	Asia
GUT_GENOME269740	ZeeviD_2015__PNP_Main_27__bin.7	CIBIO	MAG	1731372	28	129973	31.08	100	0	0	0	99.8	0	20	NA	GUT_GENOME132205	MGYG-HGUT-02163	d__Archaea;p__Methanobacteriota;c__Methanobacteria;o__Methanobacteriales;f__Methanobacteriaceae;g__Methanobrevibacter_A;s__Methanobrevibacter_A smithii	ERS971665	ERP012929	Israel	Asia
GUT_GENOME269779	ZeeviD_2015__PNP_Main_282__bin.23	CIBIO	MAG	1767610	18	143071	31.08	100	0	0	0	0	0	20	NA	GUT_GENOME132205	MGYG-HGUT-02163	d__Archaea;p__Methanobacteriota;c__Methanobacteria;o__Methanobacteriales;f__Methanobacteriaceae;g__Methanobrevibacter_A;s__Methanobrevibacter_A smithii	ERS971920	ERP012929	Israel	Asia
GUT_GENOME269830	ZeeviD_2015__PNP_Main_283__bin.68	CIBIO	MAG	1107920	10	242428	30.81	53.6	0	0	0	0	0	13	NA	GUT_GENOME132205	MGYG-HGUT-02163	d__Archaea;p__Methanobacteriota;c__Methanobacteria;o__Methanobacteriales;f__Methanobacteriaceae;g__Methanobrevibacter_A;s__Methanobrevibacter_A smithii	ERS971921	ERP012929	Israel	Asia
GUT_GENOME269861	ZeeviD_2015__PNP_Main_285__bin.28	CIBIO	MAG	1844133	26	112733	30.87	100	0	0	0	99.8	0	20	NA	GUT_GENOME132205	MGYG-HGUT-02163	d__Archaea;p__Methanobacteriota;c__Methanobacteria;o__Methanobacteriales;f__Methanobacteriaceae;g__Methanobrevibacter_A;s__Methanobrevibacter_A smithii	ERS971923	ERP012929	Israel	Asia
GUT_GENOME269915	ZeeviD_2015__PNP_Main_287__bin.60	CIBIO	MAG	1691469	17	132313	31.17	100	0	0	0	0	0	20	NA	GUT_GENOME132205	MGYG-HGUT-02163	d__Archaea;p__Methanobacteriota;c__Methanobacteria;o__Methanobacteriales;f__Methanobacteriaceae;g__Methanobrevibacter_A;s__Methanobrevibacter_A smithii	ERS971925	ERP012929	Israel	Asia
GUT_GENOME270019	ZeeviD_2015__PNP_Main_292__bin.27	CIBIO	MAG	1780764	59	50645	31	100	0	0	0	0	0	20	NA	GUT_GENOME132205	MGYG-HGUT-02163	d__Archaea;p__Methanobacteriota;c__Methanobacteria;o__Methanobacteriales;f__Methanobacteriaceae;g__Methanobrevibacter_A;s__Methanobrevibacter_A smithii	ERS971930	ERP012929	Israel	Asia
GUT_GENOME270089	ZeeviD_2015__PNP_Main_294__bin.64	CIBIO	MAG	720359	5	225707	31.62	52	0	0	0	0	0	15	NA	GUT_GENOME132205	MGYG-HGUT-02163	d__Archaea;p__Methanobacteriota;c__Methanobacteria;o__Methanobacteriales;f__Methanobacteriaceae;g__Methanobrevibacter_A;s__Methanobrevibacter_A smithii	ERS971932	ERP012929	Israel	Asia
GUT_GENOME270428	ZeeviD_2015__PNP_Main_309__bin.18	CIBIO	MAG	1632275	70	34355	31.33	95.2	0.8	0.02	0	0	15.18	20	NA	GUT_GENOME132205	MGYG-HGUT-02163	d__Archaea;p__Methanobacteriota;c__Methanobacteria;o__Methanobacteriales;f__Methanobacteriaceae;g__Methanobrevibacter_A;s__Methanobrevibacter_A smithii	ERS971947	ERP012929	Israel	Asia
GUT_GENOME270475	ZeeviD_2015__PNP_Main_310__bin.4	CIBIO	MAG	1654605	75	35009	30.6	95.2	0	0.02	0	0	0	20	NA	GUT_GENOME143185	MGYG-HGUT-02446	d__Archaea;p__Methanobacteriota;c__Methanobacteria;o__Methanobacteriales;f__Methanobacteriaceae;g__Methanobrevibacter_A;s__Methanobrevibacter_A smithii_A	ERS971948	ERP012929	Israel	Asia
GUT_GENOME270563	ZeeviD_2015__PNP_Main_317__bin.21	CIBIO	MAG	1621454	24	94514	31.23	94.4	0.8	0	0	0	0	19	NA	GUT_GENOME132205	MGYG-HGUT-02163	d__Archaea;p__Methanobacteriota;c__Methanobacteria;o__Methanobacteriales;f__Methanobacteriaceae;g__Methanobrevibacter_A;s__Methanobrevibacter_A smithii	ERS971955	ERP012929	Israel	Asia
GUT_GENOME270573	ZeeviD_2015__PNP_Main_317__bin.45	CIBIO	MAG	1510700	277	6993	27.22	57.01	0.93	0.05	0	0	15.08	14	NA	GUT_GENOME132206	MGYG-HGUT-02164	d__Archaea;p__Methanobacteriota;c__Methanobacteria;o__Methanobacteriales;f__Methanobacteriaceae;g__Methanosphaera;s__Methanosphaera stadtmanae	ERS971955	ERP012929	Israel	Asia
GUT_GENOME270591	ZeeviD_2015__PNP_Main_318__bin.26	CIBIO	MAG	1720958	17	149564	31.13	100	0	0	0	0	0	20	NA	GUT_GENOME132205	MGYG-HGUT-02163	d__Archaea;p__Methanobacteriota;c__Methanobacteria;o__Methanobacteriales;f__Methanobacteriaceae;g__Methanobrevibacter_A;s__Methanobrevibacter_A smithii	ERS971956	ERP012929	Israel	Asia
GUT_GENOME270637	ZeeviD_2015__PNP_Main_320__bin.34	CIBIO	MAG	1451401	26	102185	30.67	65.6	0.8	0	0	0	0	17	NA	GUT_GENOME132205	MGYG-HGUT-02163	d__Archaea;p__Methanobacteriota;c__Methanobacteria;o__Methanobacteriales;f__Methanobacteriaceae;g__Methanobrevibacter_A;s__Methanobrevibacter_A smithii	ERS971958	ERP012929	Israel	Asia
GUT_GENOME270652	ZeeviD_2015__PNP_Main_320__bin.59	CIBIO	MAG	1007928	339	3181	62.24	64.67	0.94	0.07	87.39	0	0	18	NA	GUT_GENOME270652	MGYG-HGUT-04372	d__Archaea;p__Thermoplasmatota;c__Thermoplasmata;o__Methanomassiliicoccales;f__Methanomethylophilaceae;g__UBA71;s__	ERS971958	ERP012929	Israel	Asia
GUT_GENOME270732	ZeeviD_2015__PNP_Main_325__bin.51	CIBIO	MAG	1354001	13	142712	31.33	86.4	0	0	0	0	0	19	NA	GUT_GENOME132205	MGYG-HGUT-02163	d__Archaea;p__Methanobacteriota;c__Methanobacteria;o__Methanobacteriales;f__Methanobacteriaceae;g__Methanobrevibacter_A;s__Methanobrevibacter_A smithii	ERS971963	ERP012929	Israel	Asia
GUT_GENOME270743	ZeeviD_2015__PNP_Main_325__bin.6	CIBIO	MAG	1604000	43	79406	27.48	97.6	0	0.01	0	0	0	20	NA	GUT_GENOME132206	MGYG-HGUT-02164	d__Archaea;p__Methanobacteriota;c__Methanobacteria;o__Methanobacteriales;f__Methanobacteriaceae;g__Methanosphaera;s__Methanosphaera stadtmanae	ERS971963	ERP012929	Israel	Asia
GUT_GENOME270770	ZeeviD_2015__PNP_Main_326__bin.9	CIBIO	MAG	1759461	23	146024	31.17	100	0	0	0	0	0	20	NA	GUT_GENOME132205	MGYG-HGUT-02163	d__Archaea;p__Methanobacteriota;c__Methanobacteria;o__Methanobacteriales;f__Methanobacteriaceae;g__Methanobrevibacter_A;s__Methanobrevibacter_A smithii	ERS971964	ERP012929	Israel	Asia
GUT_GENOME270877	ZeeviD_2015__PNP_Main_331__bin.18	CIBIO	MAG	1655333	15	158687	31.32	98.4	0	0	0	0	0	20	NA	GUT_GENOME132205	MGYG-HGUT-02163	d__Archaea;p__Methanobacteriota;c__Methanobacteria;o__Methanobacteriales;f__Methanobacteriaceae;g__Methanobrevibacter_A;s__Methanobrevibacter_A smithii	ERS971969	ERP012929	Israel	Asia
GUT_GENOME271180	ZeeviD_2015__PNP_Main_345__bin.55	CIBIO	MAG	902306	12	98666	30.86	51.2	0	0.01	0	0	5.72	12	NA	GUT_GENOME132205	MGYG-HGUT-02163	d__Archaea;p__Methanobacteriota;c__Methanobacteria;o__Methanobacteriales;f__Methanobacteriaceae;g__Methanobrevibacter_A;s__Methanobrevibacter_A smithii	ERS971983	ERP012929	Israel	Asia
GUT_GENOME271211	ZeeviD_2015__PNP_Main_347__bin.21	CIBIO	MAG	1616442	80	33330	31.26	97.6	0	0.01	0	0	5.22	20	NA	GUT_GENOME132205	MGYG-HGUT-02163	d__Archaea;p__Methanobacteriota;c__Methanobacteria;o__Methanobacteriales;f__Methanobacteriaceae;g__Methanobrevibacter_A;s__Methanobrevibacter_A smithii	ERS971985	ERP012929	Israel	Asia
GUT_GENOME271420	ZeeviD_2015__PNP_Main_356__bin.16	CIBIO	MAG	1269646	15	144214	31.59	83.2	0	0	0	0	0	19	NA	GUT_GENOME132205	MGYG-HGUT-02163	d__Archaea;p__Methanobacteriota;c__Methanobacteria;o__Methanobacteriales;f__Methanobacteriaceae;g__Methanobrevibacter_A;s__Methanobrevibacter_A smithii	ERS971994	ERP012929	Israel	Asia
GUT_GENOME271445	ZeeviD_2015__PNP_Main_357__bin.19	CIBIO	MAG	1172820	238	6370	31.59	74.74	0	0.04	0	0	0	17	NA	GUT_GENOME132205	MGYG-HGUT-02163	d__Archaea;p__Methanobacteriota;c__Methanobacteria;o__Methanobacteriales;f__Methanobacteriaceae;g__Methanobrevibacter_A;s__Methanobrevibacter_A smithii	ERS971995	ERP012929	Israel	Asia
GUT_GENOME271510	ZeeviD_2015__PNP_Main_35__bin.34	CIBIO	MAG	1779977	44	61896	31.08	100	0	0.01	0	0	0	20	NA	GUT_GENOME132205	MGYG-HGUT-02163	d__Archaea;p__Methanobacteriota;c__Methanobacteria;o__Methanobacteriales;f__Methanobacteriaceae;g__Methanobrevibacter_A;s__Methanobrevibacter_A smithii	ERS971673	ERP012929	Israel	Asia
GUT_GENOME271726	ZeeviD_2015__PNP_Main_370__bin.32	CIBIO	MAG	1761207	32	110328	31.08	100	0	0.01	0	0	0	20	NA	GUT_GENOME132205	MGYG-HGUT-02163	d__Archaea;p__Methanobacteriota;c__Methanobacteria;o__Methanobacteriales;f__Methanobacteriaceae;g__Methanobrevibacter_A;s__Methanobrevibacter_A smithii	ERS972008	ERP012929	Israel	Asia
GUT_GENOME271776	ZeeviD_2015__PNP_Main_372__bin.5	CIBIO	MAG	1325251	102	21452	31.69	82.52	0.13	0.03	0	0	0	19	NA	GUT_GENOME132205	MGYG-HGUT-02163	d__Archaea;p__Methanobacteriota;c__Methanobacteria;o__Methanobacteriales;f__Methanobacteriaceae;g__Methanobrevibacter_A;s__Methanobrevibacter_A smithii	ERS972010	ERP012929	Israel	Asia
GUT_GENOME271785	ZeeviD_2015__PNP_Main_373__bin.27	CIBIO	MAG	1764399	23	142852	30.99	100	0	0	0	0	0	20	NA	GUT_GENOME132205	MGYG-HGUT-02163	d__Archaea;p__Methanobacteriota;c__Methanobacteria;o__Methanobacteriales;f__Methanobacteriaceae;g__Methanobrevibacter_A;s__Methanobrevibacter_A smithii	ERS972011	ERP012929	Israel	Asia
GUT_GENOME271951	ZeeviD_2015__PNP_Main_381__bin.34	CIBIO	MAG	1329988	15	111887	31.3	84.8	0	0	0	0	0	18	NA	GUT_GENOME132205	MGYG-HGUT-02163	d__Archaea;p__Methanobacteriota;c__Methanobacteria;o__Methanobacteriales;f__Methanobacteriaceae;g__Methanobrevibacter_A;s__Methanobrevibacter_A smithii	ERS972019	ERP012929	Israel	Asia
GUT_GENOME271974	ZeeviD_2015__PNP_Main_382__bin.40	CIBIO	MAG	1708846	22	117760	31.04	100	0.8	0.01	0	0	0	20	NA	GUT_GENOME132205	MGYG-HGUT-02163	d__Archaea;p__Methanobacteriota;c__Methanobacteria;o__Methanobacteriales;f__Methanobacteriaceae;g__Methanobrevibacter_A;s__Methanobrevibacter_A smithii	ERS972020	ERP012929	Israel	Asia
GUT_GENOME272039	ZeeviD_2015__PNP_Main_386__bin.15	CIBIO	MAG	1626237	61	42616	31.24	98.4	1.07	0.02	0	0	0	20	NA	GUT_GENOME132205	MGYG-HGUT-02163	d__Archaea;p__Methanobacteriota;c__Methanobacteria;o__Methanobacteriales;f__Methanobacteriaceae;g__Methanobrevibacter_A;s__Methanobrevibacter_A smithii	ERS972024	ERP012929	Israel	Asia
GUT_GENOME272190	ZeeviD_2015__PNP_Main_391__bin.9	CIBIO	MAG	1747282	24	109419	31.12	100	0	0	0	0	0	20	NA	GUT_GENOME132205	MGYG-HGUT-02163	d__Archaea;p__Methanobacteriota;c__Methanobacteria;o__Methanobacteriales;f__Methanobacteriaceae;g__Methanobrevibacter_A;s__Methanobrevibacter_A smithii	ERS972029	ERP012929	Israel	Asia
GUT_GENOME272206	ZeeviD_2015__PNP_Main_392__bin.7	CIBIO	MAG	1518207	87	42401	31.5	94.27	0.8	0.01	0	0	0	20	NA	GUT_GENOME132205	MGYG-HGUT-02163	d__Archaea;p__Methanobacteriota;c__Methanobacteria;o__Methanobacteriales;f__Methanobacteriaceae;g__Methanobrevibacter_A;s__Methanobrevibacter_A smithii	ERS972030	ERP012929	Israel	Asia
GUT_GENOME272214	ZeeviD_2015__PNP_Main_393__bin.22	CIBIO	MAG	1687176	21	277679	31.21	100	2.4	0	0	0	0	20	NA	GUT_GENOME132205	MGYG-HGUT-02163	d__Archaea;p__Methanobacteriota;c__Methanobacteria;o__Methanobacteriales;f__Methanobacteriaceae;g__Methanobrevibacter_A;s__Methanobrevibacter_A smithii	ERS972031	ERP012929	Israel	Asia
GUT_GENOME272455	ZeeviD_2015__PNP_Main_402__bin.27	CIBIO	MAG	1510567	217	9675	31.34	91.07	0.4	0.05	0	0	0	18	NA	GUT_GENOME132205	MGYG-HGUT-02163	d__Archaea;p__Methanobacteriota;c__Methanobacteria;o__Methanobacteriales;f__Methanobacteriaceae;g__Methanobrevibacter_A;s__Methanobrevibacter_A smithii	ERS972040	ERP012929	Israel	Asia
GUT_GENOME272466	ZeeviD_2015__PNP_Main_403__bin.14	CIBIO	MAG	1743035	16	172818	31.2	100	0	0	0	0	0	20	NA	GUT_GENOME132205	MGYG-HGUT-02163	d__Archaea;p__Methanobacteriota;c__Methanobacteria;o__Methanobacteriales;f__Methanobacteriaceae;g__Methanobrevibacter_A;s__Methanobrevibacter_A smithii	ERS972041	ERP012929	Israel	Asia
GUT_GENOME272491	ZeeviD_2015__PNP_Main_404__bin.10	CIBIO	MAG	1384094	19	130573	31.32	92.8	0	0	0	0	0	19	NA	GUT_GENOME132205	MGYG-HGUT-02163	d__Archaea;p__Methanobacteriota;c__Methanobacteria;o__Methanobacteriales;f__Methanobacteriaceae;g__Methanobrevibacter_A;s__Methanobrevibacter_A smithii	ERS972042	ERP012929	Israel	Asia
GUT_GENOME272533	ZeeviD_2015__PNP_Main_406__bin.14	CIBIO	MAG	1940097	71	50482	30.32	100	0	0.02	0	0	0	17	NA	GUT_GENOME143185	MGYG-HGUT-02446	d__Archaea;p__Methanobacteriota;c__Methanobacteria;o__Methanobacteriales;f__Methanobacteriaceae;g__Methanobrevibacter_A;s__Methanobrevibacter_A smithii_A	ERS972044	ERP012929	Israel	Asia
GUT_GENOME272574	ZeeviD_2015__PNP_Main_409__bin.11	CIBIO	MAG	1630562	196	12980	31.19	94.03	2.67	0.04	0	0	0	15	NA	GUT_GENOME132205	MGYG-HGUT-02163	d__Archaea;p__Methanobacteriota;c__Methanobacteria;o__Methanobacteriales;f__Methanobacteriaceae;g__Methanobrevibacter_A;s__Methanobrevibacter_A smithii	ERS972047	ERP012929	Israel	Asia
GUT_GENOME272667	ZeeviD_2015__PNP_Main_412__bin.37	CIBIO	MAG	1079128	7	193082	31.43	67.2	0	0	0	0	0	17	NA	GUT_GENOME132205	MGYG-HGUT-02163	d__Archaea;p__Methanobacteriota;c__Methanobacteria;o__Methanobacteriales;f__Methanobacteriaceae;g__Methanobrevibacter_A;s__Methanobrevibacter_A smithii	ERS972050	ERP012929	Israel	Asia
GUT_GENOME272753	ZeeviD_2015__PNP_Main_414__bin.7	CIBIO	MAG	1792994	26	107448	31.16	100	0.8	0	0	0	0	20	NA	GUT_GENOME132205	MGYG-HGUT-02163	d__Archaea;p__Methanobacteriota;c__Methanobacteria;o__Methanobacteriales;f__Methanobacteriaceae;g__Methanobrevibacter_A;s__Methanobrevibacter_A smithii	ERS972052	ERP012929	Israel	Asia
GUT_GENOME272979	ZeeviD_2015__PNP_Main_424__bin.23	CIBIO	MAG	1662260	16	190220	31.27	100	0	0	0	0	0	20	NA	GUT_GENOME132205	MGYG-HGUT-02163	d__Archaea;p__Methanobacteriota;c__Methanobacteria;o__Methanobacteriales;f__Methanobacteriaceae;g__Methanobrevibacter_A;s__Methanobrevibacter_A smithii	ERS972062	ERP012929	Israel	Asia
GUT_GENOME273277	ZeeviD_2015__PNP_Main_437__bin.13	CIBIO	MAG	1661817	245	9381	27.98	95.33	0.8	0.07	0	7.52	0	20	NA	GUT_GENOME273277	MGYG-HGUT-04410	d__Archaea;p__Methanobacteriota;c__Methanobacteria;o__Methanobacteriales;f__Methanobacteriaceae;g__Methanosphaera;s__Methanosphaera cuniculi	ERS972075	ERP012929	Israel	Asia
GUT_GENOME273313	ZeeviD_2015__PNP_Main_438__bin.24	CIBIO	MAG	1751144	30	135251	31.17	100	0	0.01	0	0	0	20	NA	GUT_GENOME132205	MGYG-HGUT-02163	d__Archaea;p__Methanobacteriota;c__Methanobacteria;o__Methanobacteriales;f__Methanobacteriaceae;g__Methanobrevibacter_A;s__Methanobrevibacter_A smithii	ERS972076	ERP012929	Israel	Asia
GUT_GENOME273595	ZeeviD_2015__PNP_Main_449__bin.39	CIBIO	MAG	1717767	19	140179	31.1	100	0	0	0	0	0	20	NA	GUT_GENOME132205	MGYG-HGUT-02163	d__Archaea;p__Methanobacteriota;c__Methanobacteria;o__Methanobacteriales;f__Methanobacteriaceae;g__Methanobrevibacter_A;s__Methanobrevibacter_A smithii	ERS972087	ERP012929	Israel	Asia
GUT_GENOME273630	ZeeviD_2015__PNP_Main_451__bin.13	CIBIO	MAG	1705982	33	69939	31.05	100	0	0.01	0	0	0	20	NA	GUT_GENOME132205	MGYG-HGUT-02163	d__Archaea;p__Methanobacteriota;c__Methanobacteria;o__Methanobacteriales;f__Methanobacteriaceae;g__Methanobrevibacter_A;s__Methanobrevibacter_A smithii	ERS972089	ERP012929	Israel	Asia
GUT_GENOME273779	ZeeviD_2015__PNP_Main_456__bin.40	CIBIO	MAG	1862753	105	31910	31.07	99.2	1.9	0.01	0	0	0	20	NA	GUT_GENOME132205	MGYG-HGUT-02163	d__Archaea;p__Methanobacteriota;c__Methanobacteria;o__Methanobacteriales;f__Methanobacteriaceae;g__Methanobrevibacter_A;s__Methanobrevibacter_A smithii	ERS972094	ERP012929	Israel	Asia
GUT_GENOME273866	ZeeviD_2015__PNP_Main_45__bin.60	CIBIO	MAG	1940012	68	48734	30.84	100	0	0.01	0	0	0	20	NA	GUT_GENOME132205	MGYG-HGUT-02163	d__Archaea;p__Methanobacteriota;c__Methanobacteria;o__Methanobacteriales;f__Methanobacteriaceae;g__Methanobrevibacter_A;s__Methanobrevibacter_A smithii	ERS971683	ERP012929	Israel	Asia
GUT_GENOME274070	ZeeviD_2015__PNP_Main_46__bin.43	CIBIO	MAG	1319144	190	9461	31.76	85.73	0	0.03	0	0	0	19	NA	GUT_GENOME132205	MGYG-HGUT-02163	d__Archaea;p__Methanobacteriota;c__Methanobacteria;o__Methanobacteriales;f__Methanobacteriaceae;g__Methanobrevibacter_A;s__Methanobrevibacter_A smithii	ERS971684	ERP012929	Israel	Asia
GUT_GENOME275598	ZeeviD_2015__PNP_Main_54__bin.20	CIBIO	MAG	1677869	18	142584	31.23	100	0	0	0	99.8	0	20	NA	GUT_GENOME132205	MGYG-HGUT-02163	d__Archaea;p__Methanobacteriota;c__Methanobacteria;o__Methanobacteriales;f__Methanobacteriaceae;g__Methanobrevibacter_A;s__Methanobrevibacter_A smithii	ERS971692	ERP012929	Israel	Asia
GUT_GENOME275693	ZeeviD_2015__PNP_Main_553__bin.9	CIBIO	MAG	1280323	377	3784	60.04	75.45	0.81	0.14	71.43	99.8	0	19	NA	GUT_GENOME251929	MGYG-HGUT-03962	d__Archaea;p__Thermoplasmatota;c__Thermoplasmata;o__Methanomassiliicoccales;f__Methanomethylophilaceae;g__UBA71;s__	ERS972191	ERP012929	Israel	Asia
GUT_GENOME276132	ZeeviD_2015__PNP_Main_577__bin.39	CIBIO	MAG	1798416	26	130586	31.1	100	0	0.01	0	0	0	20	NA	GUT_GENOME132205	MGYG-HGUT-02163	d__Archaea;p__Methanobacteriota;c__Methanobacteria;o__Methanobacteriales;f__Methanobacteriaceae;g__Methanobrevibacter_A;s__Methanobrevibacter_A smithii	ERS972215	ERP012929	Israel	Asia
GUT_GENOME276206	ZeeviD_2015__PNP_Main_581__bin.14	CIBIO	MAG	1793428	37	112119	31.07	100	0.8	0.02	0	99.8	87.83	20	NA	GUT_GENOME132205	MGYG-HGUT-02163	d__Archaea;p__Methanobacteriota;c__Methanobacteria;o__Methanobacteriales;f__Methanobacteriaceae;g__Methanobrevibacter_A;s__Methanobrevibacter_A smithii	ERS972219	ERP012929	Israel	Asia
GUT_GENOME276268	ZeeviD_2015__PNP_Main_586__bin.21	CIBIO	MAG	959079	337	2981	60.07	66.15	0	0.07	86.55	29.59	7.49	16	NA	GUT_GENOME251929	MGYG-HGUT-03962	d__Archaea;p__Thermoplasmatota;c__Thermoplasmata;o__Methanomassiliicoccales;f__Methanomethylophilaceae;g__UBA71;s__	ERS972224	ERP012929	Israel	Asia
GUT_GENOME276381	ZeeviD_2015__PNP_Main_58__bin.46	CIBIO	MAG	1659445	45	54907	31.16	99.2	0	0.01	0	0	0	20	NA	GUT_GENOME132205	MGYG-HGUT-02163	d__Archaea;p__Methanobacteriota;c__Methanobacteria;o__Methanobacteriales;f__Methanobacteriaceae;g__Methanobrevibacter_A;s__Methanobrevibacter_A smithii	ERS971696	ERP012929	Israel	Asia
GUT_GENOME277238	ZeeviD_2015__PNP_Main_63__bin.14	CIBIO	MAG	1747769	17	160375	31.08	100	0	0	0	0	0	20	NA	GUT_GENOME132205	MGYG-HGUT-02163	d__Archaea;p__Methanobacteriota;c__Methanobacteria;o__Methanobacteriales;f__Methanobacteriaceae;g__Methanobrevibacter_A;s__Methanobrevibacter_A smithii	ERS971701	ERP012929	Israel	Asia
GUT_GENOME277917	ZeeviD_2015__PNP_Main_67__bin.40	CIBIO	MAG	1714102	43	55132	31.21	99.2	0.8	0.01	0	0	99.5	20	NA	GUT_GENOME132205	MGYG-HGUT-02163	d__Archaea;p__Methanobacteriota;c__Methanobacteria;o__Methanobacteriales;f__Methanobacteriaceae;g__Methanobrevibacter_A;s__Methanobrevibacter_A smithii	ERS971705	ERP012929	Israel	Asia
GUT_GENOME278408	ZeeviD_2015__PNP_Main_706__bin.81	CIBIO	MAG	1510637	418	4233	30.52	82.47	1.47	0.06	0	0	0	14	NA	GUT_GENOME132205	MGYG-HGUT-02163	d__Archaea;p__Methanobacteriota;c__Methanobacteria;o__Methanobacteriales;f__Methanobacteriaceae;g__Methanobrevibacter_A;s__Methanobrevibacter_A smithii	ERS972344	ERP012929	Israel	Asia
GUT_GENOME278839	ZeeviD_2015__PNP_Main_72__bin.37	CIBIO	MAG	1832774	33	94138	30.95	100	0.8	0	0	0	0	20	NA	GUT_GENOME132205	MGYG-HGUT-02163	d__Archaea;p__Methanobacteriota;c__Methanobacteria;o__Methanobacteriales;f__Methanobacteriaceae;g__Methanobrevibacter_A;s__Methanobrevibacter_A smithii	ERS971710	ERP012929	Israel	Asia
GUT_GENOME278946	ZeeviD_2015__PNP_Main_73__bin.21	CIBIO	MAG	1728619	22	197358	31.15	100	0	0	0	0	99.5	20	NA	GUT_GENOME132205	MGYG-HGUT-02163	d__Archaea;p__Methanobacteriota;c__Methanobacteria;o__Methanobacteriales;f__Methanobacteriaceae;g__Methanobrevibacter_A;s__Methanobrevibacter_A smithii	ERS971711	ERP012929	Israel	Asia
GUT_GENOME279390	ZeeviD_2015__PNP_Main_764__bin.19	CIBIO	MAG	1638375	197	12070	58.79	92.88	1.61	0.04	86.55	0	99.13	19	NA	GUT_GENOME268463	MGYG-HGUT-04339	d__Archaea;p__Thermoplasmatota;c__Thermoplasmata;o__Methanomassiliicoccales;f__Methanomethylophilaceae;g__UBA71;s__	ERS972402	ERP012929	Israel	Asia
GUT_GENOME279824	ZeeviD_2015__PNP_Main_80__bin.75	CIBIO	MAG	1213207	14	169381	31.32	75.2	0	0	0	0	0	17	NA	GUT_GENOME132205	MGYG-HGUT-02163	d__Archaea;p__Methanobacteriota;c__Methanobacteria;o__Methanobacteriales;f__Methanobacteriaceae;g__Methanobrevibacter_A;s__Methanobrevibacter_A smithii	ERS971718	ERP012929	Israel	Asia
GUT_GENOME279865	ZeeviD_2015__PNP_Main_82__bin.30	CIBIO	MAG	1774528	28	113832	31	100	0	0	0	0	0	20	NA	GUT_GENOME132205	MGYG-HGUT-02163	d__Archaea;p__Methanobacteriota;c__Methanobacteria;o__Methanobacteriales;f__Methanobacteriaceae;g__Methanobrevibacter_A;s__Methanobrevibacter_A smithii	ERS971720	ERP012929	Israel	Asia
GUT_GENOME279890	ZeeviD_2015__PNP_Main_82__bin.81	CIBIO	MAG	1060866	96	15467	28.24	68.8	0	0.01	0	0	0	13	NA	GUT_GENOME132206	MGYG-HGUT-02164	d__Archaea;p__Methanobacteriota;c__Methanobacteria;o__Methanobacteriales;f__Methanobacteriaceae;g__Methanosphaera;s__Methanosphaera stadtmanae	ERS971720	ERP012929	Israel	Asia
GUT_GENOME279910	ZeeviD_2015__PNP_Main_83__bin.35	CIBIO	MAG	1631722	30	103580	30.89	96	0	0	0	0	0	20	NA	GUT_GENOME132205	MGYG-HGUT-02163	d__Archaea;p__Methanobacteriota;c__Methanobacteria;o__Methanobacteriales;f__Methanobacteriaceae;g__Methanobrevibacter_A;s__Methanobrevibacter_A smithii	ERS971721	ERP012929	Israel	Asia
GUT_GENOME279956	ZeeviD_2015__PNP_Main_84__bin.82	CIBIO	MAG	840509	108	10321	31.83	58.02	0	0.01	0	0	0	10	NA	GUT_GENOME132205	MGYG-HGUT-02163	d__Archaea;p__Methanobacteriota;c__Methanobacteria;o__Methanobacteriales;f__Methanobacteriaceae;g__Methanobrevibacter_A;s__Methanobrevibacter_A smithii	ERS971722	ERP012929	Israel	Asia
GUT_GENOME279960	ZeeviD_2015__PNP_Main_85__bin.15	CIBIO	MAG	1604355	295	6804	31.11	89.73	0.8	0.07	0	99.8	0	17	NA	GUT_GENOME132205	MGYG-HGUT-02163	d__Archaea;p__Methanobacteriota;c__Methanobacteria;o__Methanobacteriales;f__Methanobacteriaceae;g__Methanobrevibacter_A;s__Methanobrevibacter_A smithii	ERS971723	ERP012929	Israel	Asia
GUT_GENOME280011	ZeeviD_2015__PNP_Main_87__bin.10	CIBIO	MAG	1713323	23	142754	31.1	100	0	0.01	0	0	0	20	NA	GUT_GENOME132205	MGYG-HGUT-02163	d__Archaea;p__Methanobacteriota;c__Methanobacteria;o__Methanobacteriales;f__Methanobacteriaceae;g__Methanobrevibacter_A;s__Methanobrevibacter_A smithii	ERS971725	ERP012929	Israel	Asia
GUT_GENOME280023	ZeeviD_2015__PNP_Main_87__bin.37	CIBIO	MAG	1717440	180	13397	27.93	89.6	0.8	0.02	0	7.65	12.17	14	NA	GUT_GENOME273277	MGYG-HGUT-04410	d__Archaea;p__Methanobacteriota;c__Methanobacteria;o__Methanobacteriales;f__Methanobacteriaceae;g__Methanosphaera;s__Methanosphaera cuniculi	ERS971725	ERP012929	Israel	Asia
GUT_GENOME280155	ZeeviD_2015__PNP_Main_92__bin.38	CIBIO	MAG	1763677	59	63660	30.46	99.2	0.8	0.01	0	0	0	20	NA	GUT_GENOME143185	MGYG-HGUT-02446	d__Archaea;p__Methanobacteriota;c__Methanobacteria;o__Methanobacteriales;f__Methanobacteriaceae;g__Methanobrevibacter_A;s__Methanobrevibacter_A smithii_A	ERS971730	ERP012929	Israel	Asia
GUT_GENOME280251	ZeeviD_2015__PNP_Main_96__bin.42	CIBIO	MAG	1733683	74	41842	31.16	100	0	0.02	0	99.8	0	20	NA	GUT_GENOME132205	MGYG-HGUT-02163	d__Archaea;p__Methanobacteriota;c__Methanobacteria;o__Methanobacteriales;f__Methanobacteriaceae;g__Methanobrevibacter_A;s__Methanobrevibacter_A smithii	ERS971734	ERP012929	Israel	Asia
GUT_GENOME280278	ZeeviD_2015__PNP_Main_97__bin.38	CIBIO	MAG	790448	8	174616	31.56	50.4	0	0	0	0	0	15	NA	GUT_GENOME132205	MGYG-HGUT-02163	d__Archaea;p__Methanobacteriota;c__Methanobacteria;o__Methanobacteriales;f__Methanobacteriaceae;g__Methanobrevibacter_A;s__Methanobrevibacter_A smithii	ERS971735	ERP012929	Israel	Asia
GUT_GENOME280415	ZeeviD_2015__PNP_Validation_13__bin.44	CIBIO	MAG	1427058	358	4714	60.1	87.71	1.21	0.05	0	0	36.09	18	NA	GUT_GENOME251929	MGYG-HGUT-03962	d__Archaea;p__Thermoplasmatota;c__Thermoplasmata;o__Methanomassiliicoccales;f__Methanomethylophilaceae;g__UBA71;s__	ERS953832	ERP012929	Israel	Asia
GUT_GENOME281123	ZeeviD_2015__PNP_Validation_49__bin.22	CIBIO	MAG	1750413	24	119250	31.13	100	0	0	0	0	0	20	NA	GUT_GENOME132205	MGYG-HGUT-02163	d__Archaea;p__Methanobacteriota;c__Methanobacteria;o__Methanobacteriales;f__Methanobacteriaceae;g__Methanobrevibacter_A;s__Methanobrevibacter_A smithii	ERS953868	ERP012929	Israel	Asia
GUT_GENOME281698	ZeeviD_2015__PNP_Validation_7__bin.1	CIBIO	MAG	1421850	349	4858	60.33	89.13	0.81	0.04	86.55	0	99.16	19	NA	GUT_GENOME247230	MGYG-HGUT-03888	d__Archaea;p__Thermoplasmatota;c__Thermoplasmata;o__Methanomassiliicoccales;f__Methanomethylophilaceae;g__UBA71;s__	ERS953826	ERP012929	Israel	Asia
GUT_GENOME282014	ZellerG_2014__CCIS03473770ST-4-0__bin.24	CIBIO	MAG	1587727	226	9127	31.87	93.14	1.47	0.05	0	0	0	16	NA	GUT_GENOME132205	MGYG-HGUT-02163	d__Archaea;p__Methanobacteriota;c__Methanobacteria;o__Methanobacteriales;f__Methanobacteriaceae;g__Methanobrevibacter_A;s__Methanobrevibacter_A smithii	ERS436668	ERP005534	France	Europe
GUT_GENOME282111	ZellerG_2014__CCIS06260551ST-3-0__bin.19	CIBIO	MAG	1635925	43	66398	31.27	100	0	0.19	0	0	0	20	NA	GUT_GENOME132205	MGYG-HGUT-02163	d__Archaea;p__Methanobacteriota;c__Methanobacteria;o__Methanobacteriales;f__Methanobacteriaceae;g__Methanobrevibacter_A;s__Methanobrevibacter_A smithii	ERS436672	ERP005534	France	Europe
GUT_GENOME282155	ZellerG_2014__CCIS07539127ST-4-0__bin.20	CIBIO	MAG	1569783	88	26507	31.57	99.2	0	0.06	0	99.8	99.5	20	NA	GUT_GENOME132205	MGYG-HGUT-02163	d__Archaea;p__Methanobacteriota;c__Methanobacteria;o__Methanobacteriales;f__Methanobacteriaceae;g__Methanobrevibacter_A;s__Methanobrevibacter_A smithii	ERS436793	ERP005534	France	Europe
GUT_GENOME282393	ZellerG_2014__CCIS11354283ST-4-0__bin.50	CIBIO	MAG	1686411	33	81770	31.17	100	0	0.04	0	0	0	20	NA	GUT_GENOME132205	MGYG-HGUT-02163	d__Archaea;p__Methanobacteriota;c__Methanobacteria;o__Methanobacteriales;f__Methanobacteriaceae;g__Methanobrevibacter_A;s__Methanobrevibacter_A smithii	ERS436782	ERP005534	France	Europe
GUT_GENOME282407	ZellerG_2014__CCIS11362406ST-4-0__bin.29	CIBIO	MAG	1925564	31	109469	30.44	100	0.8	0.13	0	0	0	20	NA	GUT_GENOME143185	MGYG-HGUT-02446	d__Archaea;p__Methanobacteriota;c__Methanobacteria;o__Methanobacteriales;f__Methanobacteriaceae;g__Methanobrevibacter_A;s__Methanobrevibacter_A smithii_A	ERS436697	ERP005534	France	Europe
GUT_GENOME282469	ZellerG_2014__CCIS12656533ST-4-0__bin.42	CIBIO	MAG	1829062	42	74008	31.09	100	0.8	0.05	0	0	0	20	NA	GUT_GENOME132205	MGYG-HGUT-02163	d__Archaea;p__Methanobacteriota;c__Methanobacteria;o__Methanobacteriales;f__Methanobacteriaceae;g__Methanobrevibacter_A;s__Methanobrevibacter_A smithii	ERS436730	ERP005534	France	Europe
GUT_GENOME282705	ZellerG_2014__CCIS20795251ST-4-0__bin.16	CIBIO	MAG	1756518	13	185547	31.16	100	0	0.04	0	40.35	99.5	20	NA	GUT_GENOME132205	MGYG-HGUT-02163	d__Archaea;p__Methanobacteriota;c__Methanobacteria;o__Methanobacteriales;f__Methanobacteriaceae;g__Methanobrevibacter_A;s__Methanobrevibacter_A smithii	ERS436784	ERP005534	France	Europe
GUT_GENOME282731	ZellerG_2014__CCIS20795251ST-4-0__bin.63	CIBIO	MAG	1673869	302	6851	27.75	83.54	0.13	0.2	0	0	0	11	NA	GUT_GENOME132206	MGYG-HGUT-02164	d__Archaea;p__Methanobacteriota;c__Methanobacteria;o__Methanobacteriales;f__Methanobacteriaceae;g__Methanosphaera;s__Methanosphaera stadtmanae	ERS436784	ERP005534	France	Europe
GUT_GENOME282742	ZellerG_2014__CCIS21126322ST-4-0__bin.14	CIBIO	MAG	1808976	24	190119	30.92	100	0	0.06	0	0	0	20	NA	GUT_GENOME132205	MGYG-HGUT-02163	d__Archaea;p__Methanobacteriota;c__Methanobacteria;o__Methanobacteriales;f__Methanobacteriaceae;g__Methanobrevibacter_A;s__Methanobrevibacter_A smithii	ERS436660	ERP005534	France	Europe
GUT_GENOME282793	ZellerG_2014__CCIS21278152ST-4-0__bin.46	CIBIO	MAG	1710955	222	10412	31.42	99.2	0	0.05	0	0	0	20	NA	GUT_GENOME132205	MGYG-HGUT-02163	d__Archaea;p__Methanobacteriota;c__Methanobacteria;o__Methanobacteriales;f__Methanobacteriaceae;g__Methanobrevibacter_A;s__Methanobrevibacter_A smithii	ERS436699	ERP005534	France	Europe
GUT_GENOME283003	ZellerG_2014__CCIS25399172ST-4-0__bin.22	CIBIO	MAG	1196700	319	4336	57.12	88.93	1.61	0.09	87.39	0	0	16	NA	GUT_GENOME143252	MGYG-HGUT-02456	d__Archaea;p__Thermoplasmatota;c__Thermoplasmata;o__Methanomassiliicoccales;f__Methanomethylophilaceae;g__Methanomethylophilus;s__Methanomethylophilus alvus	ERS436700	ERP005534	France	Europe
GUT_GENOME283019	ZellerG_2014__CCIS27304052ST-3-0__bin.18	CIBIO	MAG	1790095	18	172519	31.04	100	0.8	0.04	0	0	0	20	NA	GUT_GENOME132205	MGYG-HGUT-02163	d__Archaea;p__Methanobacteriota;c__Methanobacteria;o__Methanobacteriales;f__Methanobacteriaceae;g__Methanobrevibacter_A;s__Methanobrevibacter_A smithii	ERS436644	ERP005534	France	Europe
GUT_GENOME283051	ZellerG_2014__CCIS28384594ST-4-0__bin.11	CIBIO	MAG	1124455	391	3024	33.16	71.54	1.39	0.05	0	0	0	14	NA	GUT_GENOME132205	MGYG-HGUT-02163	d__Archaea;p__Methanobacteriota;c__Methanobacteria;o__Methanobacteriales;f__Methanobacteriaceae;g__Methanobrevibacter_A;s__Methanobrevibacter_A smithii	ERS436696	ERP005534	France	Europe
GUT_GENOME283118	ZellerG_2014__CCIS31434951ST-20-0__bin.31	CIBIO	MAG	1693006	228	11236	31.28	97.2	0	0.08	0	0	0	20	NA	GUT_GENOME132205	MGYG-HGUT-02163	d__Archaea;p__Methanobacteriota;c__Methanobacteria;o__Methanobacteriales;f__Methanobacteriaceae;g__Methanobrevibacter_A;s__Methanobrevibacter_A smithii	ERS436728	ERP005534	France	Europe
GUT_GENOME283127	ZellerG_2014__CCIS32105356ST-4-0__bin.1	CIBIO	MAG	1640369	362	5761	31.95	92.34	0.4	0.04	0	56.8	39.36	17	NA	GUT_GENOME132205	MGYG-HGUT-02163	d__Archaea;p__Methanobacteriota;c__Methanobacteria;o__Methanobacteriales;f__Methanobacteriaceae;g__Methanobrevibacter_A;s__Methanobrevibacter_A smithii	ERS436716	ERP005534	France	Europe
GUT_GENOME283172	ZellerG_2014__CCIS33816588ST-4-0__bin.22	CIBIO	MAG	1242141	11	187146	31.47	82.4	0	0.02	0	0	0	17	NA	GUT_GENOME132205	MGYG-HGUT-02163	d__Archaea;p__Methanobacteriota;c__Methanobacteria;o__Methanobacteriales;f__Methanobacteriaceae;g__Methanobrevibacter_A;s__Methanobrevibacter_A smithii	ERS436729	ERP005534	France	Europe
GUT_GENOME283178	ZellerG_2014__CCIS33816588ST-4-0__bin.32	CIBIO	MAG	1759917	90	31401	29.79	97.6	0	0.11	0	0	10.64	19	NA	GUT_GENOME283178	MGYG-HGUT-04563	d__Archaea;p__Methanobacteriota;c__Methanobacteria;o__Methanobacteriales;f__Methanobacteriaceae;g__Methanosphaera;s__Methanosphaera sp900322125	ERS436729	ERP005534	France	Europe
GUT_GENOME283261	ZellerG_2014__CCIS35100175ST-4-0__bin.10	CIBIO	MAG	1526041	146	14719	31.64	98	0	0.06	0	99.8	0	20	NA	GUT_GENOME132205	MGYG-HGUT-02163	d__Archaea;p__Methanobacteriota;c__Methanobacteria;o__Methanobacteriales;f__Methanobacteriaceae;g__Methanobrevibacter_A;s__Methanobrevibacter_A smithii	ERS436753	ERP005534	France	Europe
GUT_GENOME283326	ZellerG_2014__CCIS36797902ST-4-0__bin.33	CIBIO	MAG	1819424	5	562255	30.97	100	0	0.05	0	0	0	20	NA	GUT_GENOME132205	MGYG-HGUT-02163	d__Archaea;p__Methanobacteriota;c__Methanobacteria;o__Methanobacteriales;f__Methanobacteriaceae;g__Methanobrevibacter_A;s__Methanobrevibacter_A smithii	ERS436781	ERP005534	France	Europe
GUT_GENOME283332	ZellerG_2014__CCIS36797902ST-4-0__bin.43	CIBIO	MAG	1804052	21	188131	59.67	98.79	0	0.06	86.55	99.8	99.16	20	NA	GUT_GENOME251929	MGYG-HGUT-03962	d__Archaea;p__Thermoplasmatota;c__Thermoplasmata;o__Methanomassiliicoccales;f__Methanomethylophilaceae;g__UBA71;s__	ERS436781	ERP005534	France	Europe
GUT_GENOME283369	ZellerG_2014__CCIS38765456ST-20-0__bin.14	CIBIO	MAG	981979	304	3491	58.98	68.21	2.42	0.2	86.55	61.07	8.36	16	NA	GUT_GENOME283369	MGYG-HGUT-04574	d__Archaea;p__Thermoplasmatota;c__Thermoplasmata;o__Methanomassiliicoccales;f__Methanomethylophilaceae;g__UBA71;s__	ERS436741	ERP005534	France	Europe
GUT_GENOME283376	ZellerG_2014__CCIS38765456ST-20-0__bin.31	CIBIO	MAG	803358	263	3225	47.91	62.36	0	0.1	85.71	0	18.73	13	NA	GUT_GENOME020782	MGYG-HGUT-00654	d__Archaea;p__Thermoplasmatota;c__Thermoplasmata;o__Methanomassiliicoccales;f__Methanomethylophilaceae;g__;s__	ERS436741	ERP005534	France	Europe
GUT_GENOME283401	ZellerG_2014__CCIS38765456ST-20-0__bin.82	CIBIO	MAG	939918	9	181072	31.4	58.4	0	0.05	0	0	0	16	NA	GUT_GENOME132205	MGYG-HGUT-02163	d__Archaea;p__Methanobacteriota;c__Methanobacteria;o__Methanobacteriales;f__Methanobacteriaceae;g__Methanobrevibacter_A;s__Methanobrevibacter_A smithii	ERS436741	ERP005534	France	Europe
GUT_GENOME283423	ZellerG_2014__CCIS41222843ST-4-0__bin.16	CIBIO	MAG	1796260	24	145005	30.96	98.4	0	0.05	0	0	0	20	NA	GUT_GENOME132205	MGYG-HGUT-02163	d__Archaea;p__Methanobacteriota;c__Methanobacteria;o__Methanobacteriales;f__Methanobacteriaceae;g__Methanobrevibacter_A;s__Methanobrevibacter_A smithii	ERS436688	ERP005534	France	Europe
GUT_GENOME283638	ZellerG_2014__CCIS44757994ST-4-0__bin.13	CIBIO	MAG	1486274	99	22606	56.86	98.39	0	0.02	87.39	99.8	0	20	NA	GUT_GENOME143252	MGYG-HGUT-02456	d__Archaea;p__Thermoplasmatota;c__Thermoplasmata;o__Methanomassiliicoccales;f__Methanomethylophilaceae;g__Methanomethylophilus;s__Methanomethylophilus alvus	ERS436746	ERP005534	France	Europe
GUT_GENOME283665	ZellerG_2014__CCIS45793747ST-4-0__bin.1	CIBIO	MAG	2369114	501	6412	30.99	93.6	1.6	0.27	0	0	0	18	NA	GUT_GENOME132205	MGYG-HGUT-02163	d__Archaea;p__Methanobacteriota;c__Methanobacteria;o__Methanobacteriales;f__Methanobacteriaceae;g__Methanobrevibacter_A;s__Methanobrevibacter_A smithii	ERS436736	ERP005534	France	Europe
GUT_GENOME283701	ZellerG_2014__CCIS46047672ST-4-0__bin.2	CIBIO	MAG	1905101	37	82032	39.91	98.13	0	0.01	94.12	0	0	20	NA	GUT_GENOME283701	MGYG-HGUT-04585	d__Archaea;p__Methanobacteriota;c__Methanobacteria;o__Methanobacteriales;f__Methanobacteriaceae;g__Methanobacterium;s__Methanobacterium sp000499765	ERS436759	ERP005534	France	Europe
GUT_GENOME283713	ZellerG_2014__CCIS47284573ST-4-0__bin.1	CIBIO	MAG	1477217	341	5006	32.04	86.53	0.8	0.05	0	0	0	12	NA	GUT_GENOME132205	MGYG-HGUT-02163	d__Archaea;p__Methanobacteriota;c__Methanobacteria;o__Methanobacteriales;f__Methanobacteriaceae;g__Methanobrevibacter_A;s__Methanobrevibacter_A smithii	ERS436733	ERP005534	France	Europe
GUT_GENOME283998	ZellerG_2014__CCIS51667829ST-4-0__bin.75	CIBIO	MAG	1373676	309	5507	32.13	90.37	0	0.1	0	0	0	12	NA	GUT_GENOME132205	MGYG-HGUT-02163	d__Archaea;p__Methanobacteriota;c__Methanobacteria;o__Methanobacteriales;f__Methanobacteriaceae;g__Methanobrevibacter_A;s__Methanobrevibacter_A smithii	ERS436656	ERP005534	France	Europe
GUT_GENOME284001	ZellerG_2014__CCIS52234160ST-4-0__bin.11	CIBIO	MAG	1755263	27	162711	31.17	100	0.4	0.06	0	99.8	99.5	20	NA	GUT_GENOME132205	MGYG-HGUT-02163	d__Archaea;p__Methanobacteriota;c__Methanobacteria;o__Methanobacteriales;f__Methanobacteriaceae;g__Methanobrevibacter_A;s__Methanobrevibacter_A smithii	ERS436706	ERP005534	France	Europe
GUT_GENOME284054	ZellerG_2014__CCIS53043478ST-4-0__bin.23	CIBIO	MAG	1541886	207	9835	31.68	95.07	0	0.05	0	0	10.8	20	NA	GUT_GENOME132205	MGYG-HGUT-02163	d__Archaea;p__Methanobacteriota;c__Methanobacteria;o__Methanobacteriales;f__Methanobacteriaceae;g__Methanobrevibacter_A;s__Methanobrevibacter_A smithii	ERS436720	ERP005534	France	Europe
GUT_GENOME284086	ZellerG_2014__CCIS53355328ST-4-0__bin.30	CIBIO	MAG	1762795	15	265214	31.06	100	0	0.06	0	0	0	20	NA	GUT_GENOME132205	MGYG-HGUT-02163	d__Archaea;p__Methanobacteriota;c__Methanobacteria;o__Methanobacteriales;f__Methanobacteriaceae;g__Methanobrevibacter_A;s__Methanobrevibacter_A smithii	ERS436687	ERP005534	France	Europe
GUT_GENOME284137	ZellerG_2014__CCIS55230578ST-4-0__bin.44	CIBIO	MAG	1699727	23	94916	31.06	100	0	0.07	0	0	0	20	NA	GUT_GENOME132205	MGYG-HGUT-02163	d__Archaea;p__Methanobacteriota;c__Methanobacteria;o__Methanobacteriales;f__Methanobacteriaceae;g__Methanobrevibacter_A;s__Methanobrevibacter_A smithii	ERS436743	ERP005534	France	Europe
GUT_GENOME284192	ZellerG_2014__CCIS59132091ST-4-0__bin.19	CIBIO	MAG	1690285	129	21743	30.86	96	0.8	0.06	0	0	0	20	NA	GUT_GENOME143185	MGYG-HGUT-02446	d__Archaea;p__Methanobacteriota;c__Methanobacteria;o__Methanobacteriales;f__Methanobacteriaceae;g__Methanobrevibacter_A;s__Methanobrevibacter_A smithii_A	ERS436725	ERP005534	France	Europe
GUT_GENOME284277	ZellerG_2014__CCIS62605362ST-3-0__bin.55	CIBIO	MAG	1690107	13	277317	31.2	100	0	0.06	0	0	0	20	NA	GUT_GENOME132205	MGYG-HGUT-02163	d__Archaea;p__Methanobacteriota;c__Methanobacteria;o__Methanobacteriales;f__Methanobacteriaceae;g__Methanobrevibacter_A;s__Methanobrevibacter_A smithii	ERS436712	ERP005534	France	Europe
GUT_GENOME284316	ZellerG_2014__CCIS62794166ST-4-0__bin.55	CIBIO	MAG	1342003	402	3681	32.17	80.07	0	0.04	0	0	0	8	NA	GUT_GENOME132205	MGYG-HGUT-02163	d__Archaea;p__Methanobacteriota;c__Methanobacteria;o__Methanobacteriales;f__Methanobacteriaceae;g__Methanobrevibacter_A;s__Methanobrevibacter_A smithii	ERS436748	ERP005534	France	Europe
GUT_GENOME284400	ZellerG_2014__CCIS64773582ST-4-0__bin.48	CIBIO	MAG	1276482	182	8920	47.79	91.09	2.42	0.02	85.71	93.64	99.16	19	NA	GUT_GENOME020782	MGYG-HGUT-00654	d__Archaea;p__Thermoplasmatota;c__Thermoplasmata;o__Methanomassiliicoccales;f__Methanomethylophilaceae;g__;s__	ERS436670	ERP005534	France	Europe
GUT_GENOME284410	ZellerG_2014__CCIS64773582ST-4-0__bin.63	CIBIO	MAG	1832907	38	71720	30.87	100	0	0.05	0	0	0	20	NA	GUT_GENOME132205	MGYG-HGUT-02163	d__Archaea;p__Methanobacteriota;c__Methanobacteria;o__Methanobacteriales;f__Methanobacteriaceae;g__Methanobrevibacter_A;s__Methanobrevibacter_A smithii	ERS436670	ERP005534	France	Europe
GUT_GENOME284531	ZellerG_2014__CCIS71578391ST-4-0__bin.64	CIBIO	MAG	1578164	73	39139	31.25	95.2	0	0.05	0	0	0	19	NA	GUT_GENOME132205	MGYG-HGUT-02163	d__Archaea;p__Methanobacteriota;c__Methanobacteria;o__Methanobacteriales;f__Methanobacteriaceae;g__Methanobrevibacter_A;s__Methanobrevibacter_A smithii	ERS436779	ERP005534	France	Europe
GUT_GENOME284619	ZellerG_2014__CCIS74726977ST-3-0__bin.85	CIBIO	MAG	1715222	15	204303	31.05	100	0	0.06	0	0	0	20	NA	GUT_GENOME132205	MGYG-HGUT-02163	d__Archaea;p__Methanobacteriota;c__Methanobacteria;o__Methanobacteriales;f__Methanobacteriaceae;g__Methanobrevibacter_A;s__Methanobrevibacter_A smithii	ERS436646	ERP005534	France	Europe
GUT_GENOME284634	ZellerG_2014__CCIS76563044ST-4-0__bin.28	CIBIO	MAG	1767852	60	54212	31.04	100	0	0.08	0	0	0	16	NA	GUT_GENOME132205	MGYG-HGUT-02163	d__Archaea;p__Methanobacteriota;c__Methanobacteria;o__Methanobacteriales;f__Methanobacteriaceae;g__Methanobrevibacter_A;s__Methanobrevibacter_A smithii	ERS436734	ERP005534	France	Europe
GUT_GENOME284814	ZellerG_2014__CCIS79210440ST-3-0__bin.26	CIBIO	MAG	1943628	92	34964	30.33	100	0	0.08	0	0	0	18	NA	GUT_GENOME143185	MGYG-HGUT-02446	d__Archaea;p__Methanobacteriota;c__Methanobacteria;o__Methanobacteriales;f__Methanobacteriaceae;g__Methanobrevibacter_A;s__Methanobrevibacter_A smithii_A	ERS436648	ERP005534	France	Europe
GUT_GENOME284876	ZellerG_2014__CCIS81710917ST-20-0__bin.42	CIBIO	MAG	977646	15	182196	30.83	58.4	0	0.16	0	0	0	16	NA	GUT_GENOME143185	MGYG-HGUT-02446	d__Archaea;p__Methanobacteriota;c__Methanobacteria;o__Methanobacteriales;f__Methanobacteriaceae;g__Methanobrevibacter_A;s__Methanobrevibacter_A smithii_A	ERS436717	ERP005534	France	Europe
GUT_GENOME284970	ZellerG_2014__CCIS81887263ST-4-0__bin.7	CIBIO	MAG	1204570	19	177646	31.31	72	0	0.04	0	0	0	20	NA	GUT_GENOME132205	MGYG-HGUT-02163	d__Archaea;p__Methanobacteriota;c__Methanobacteria;o__Methanobacteriales;f__Methanobacteriaceae;g__Methanobrevibacter_A;s__Methanobrevibacter_A smithii	ERS436689	ERP005534	France	Europe
GUT_GENOME285106	ZellerG_2014__CCIS87116798ST-4-0__bin.16	CIBIO	MAG	1778243	21	158918	31.05	99.75	0	0.05	0	0	0	20	NA	GUT_GENOME132205	MGYG-HGUT-02163	d__Archaea;p__Methanobacteriota;c__Methanobacteria;o__Methanobacteriales;f__Methanobacteriaceae;g__Methanobrevibacter_A;s__Methanobrevibacter_A smithii	ERS436691	ERP005534	France	Europe
GUT_GENOME285252	ZellerG_2014__CCIS88317640ST-4-0__bin.67	CIBIO	MAG	1694536	128	23499	30.5	100	0	0.09	0	0	0	20	NA	GUT_GENOME143185	MGYG-HGUT-02446	d__Archaea;p__Methanobacteriota;c__Methanobacteria;o__Methanobacteriales;f__Methanobacteriaceae;g__Methanobrevibacter_A;s__Methanobrevibacter_A smithii_A	ERS436799	ERP005534	France	Europe
GUT_GENOME285299	ZellerG_2014__CCIS90164298ST-4-0__bin.89	CIBIO	MAG	1581217	48	45540	31.41	96	0	0.08	0	0	0	20	NA	GUT_GENOME132205	MGYG-HGUT-02163	d__Archaea;p__Methanobacteriota;c__Methanobacteria;o__Methanobacteriales;f__Methanobacteriaceae;g__Methanobrevibacter_A;s__Methanobrevibacter_A smithii	ERS436786	ERP005534	France	Europe
GUT_GENOME285439	ZellerG_2014__CCIS94417875ST-3-0__bin.5	CIBIO	MAG	1750050	23	126134	31.14	100	0	0.05	0	0	0	20	NA	GUT_GENOME132205	MGYG-HGUT-02163	d__Archaea;p__Methanobacteriota;c__Methanobacteria;o__Methanobacteriales;f__Methanobacteriaceae;g__Methanobrevibacter_A;s__Methanobrevibacter_A smithii	ERS436655	ERP005534	France	Europe
GUT_GENOME285547	ZellerG_2014__CCIS95409808ST-4-0__bin.9	CIBIO	MAG	1828508	13	252537	31.08	100	0	0.06	0	0	0	20	NA	GUT_GENOME132205	MGYG-HGUT-02163	d__Archaea;p__Methanobacteriota;c__Methanobacteria;o__Methanobacteriales;f__Methanobacteriaceae;g__Methanobrevibacter_A;s__Methanobrevibacter_A smithii	ERS436776	ERP005534	France	Europe
GUT_GENOME285619	ZellerG_2014__CCIS98832363ST-4-0__bin.68	CIBIO	MAG	1500683	290	6498	60.09	92.3	3.45	0.12	86.55	0	0	19	NA	GUT_GENOME251929	MGYG-HGUT-03962	d__Archaea;p__Thermoplasmatota;c__Thermoplasmata;o__Methanomassiliicoccales;f__Methanomethylophilaceae;g__UBA71;s__	ERS436721	ERP005534	France	Europe
GUT_GENOME285908	ZellerG_2014__CCMD25511638ST-21-0__bin.55	CIBIO	MAG	1070109	324	3576	60.13	68.61	1.61	0.24	0	72.38	36.25	20	NA	GUT_GENOME247230	MGYG-HGUT-03888	d__Archaea;p__Thermoplasmatota;c__Thermoplasmata;o__Methanomassiliicoccales;f__Methanomethylophilaceae;g__UBA71;s__	ERS436817	ERP005534	Germany	Europe
GUT_GENOME285960	ZellerG_2014__CCMD25963797ST-21-0__bin.78	CIBIO	MAG	1555030	161	14437	31.78	93.6	4.8	0.06	0	99.8	0	20	NA	GUT_GENOME132205	MGYG-HGUT-02163	d__Archaea;p__Methanobacteriota;c__Methanobacteria;o__Methanobacteriales;f__Methanobacteriaceae;g__Methanobrevibacter_A;s__Methanobrevibacter_A smithii	ERS436829	ERP005534	Germany	Europe
GUT_GENOME286154	ZellerG_2014__CCMD45988061ST-21-0__bin.3	CIBIO	MAG	939150	340	2917	33.2	65.79	1.33	0.08	0	0	0	10	NA	GUT_GENOME132205	MGYG-HGUT-02163	d__Archaea;p__Methanobacteriota;c__Methanobacteria;o__Methanobacteriales;f__Methanobacteriaceae;g__Methanobrevibacter_A;s__Methanobrevibacter_A smithii	ERS436830	ERP005534	Germany	Europe
GUT_GENOME286575	ZellerG_2014__CCMD82866709ST-21-0__bin.54	CIBIO	MAG	1082545	254	4947	56.62	85.48	1.1	0.12	87.39	97.97	0	18	NA	GUT_GENOME143252	MGYG-HGUT-02456	d__Archaea;p__Thermoplasmatota;c__Thermoplasmata;o__Methanomassiliicoccales;f__Methanomethylophilaceae;g__Methanomethylophilus;s__Methanomethylophilus alvus	ERS436803	ERP005534	Germany	Europe
GUT_GENOME286611	ZellerG_2014__CCMD86114146ST-21-0__bin.65	CIBIO	MAG	1906870	74	43712	30.31	100	0	0.12	0	0	0	20	NA	GUT_GENOME143185	MGYG-HGUT-02446	d__Archaea;p__Methanobacteriota;c__Methanobacteria;o__Methanobacteriales;f__Methanobacteriaceae;g__Methanobrevibacter_A;s__Methanobrevibacter_A smithii_A	ERS436831	ERP005534	Germany	Europe
GUT_GENOME286660	ZellerG_2014__CCMD87156761ST-21-0__bin.1	CIBIO	MAG	990865	344	3122	33.2	62.39	0.21	0.07	0	0	0	7	NA	GUT_GENOME132205	MGYG-HGUT-02163	d__Archaea;p__Methanobacteriota;c__Methanobacteria;o__Methanobacteriales;f__Methanobacteriaceae;g__Methanobrevibacter_A;s__Methanobrevibacter_A smithii	ERS436801	ERP005534	Germany	Europe

## Sheet: b. 833 archaeal genomes
Genome	Genome Taxonomy Database lineage
GUT_GENOME001950	d__Archaea;p__Methanobacteriota;c__Methanobacteria;o__Methanobacteriales;f__Methanobacteriaceae;g__Methanobrevibacter_A;s__Methanobrevibacter_A smithii
GUT_GENOME001966	d__Archaea;p__Methanobacteriota;c__Methanobacteria;o__Methanobacteriales;f__Methanobacteriaceae;g__Methanobrevibacter_A;s__Methanobrevibacter_A smithii
GUT_GENOME003140	d__Archaea;p__Methanobacteriota;c__Methanobacteria;o__Methanobacteriales;f__Methanobacteriaceae;g__Methanobrevibacter_A;s__Methanobrevibacter_A smithii
GUT_GENOME007534	d__Archaea;p__Thermoplasmatota;c__Thermoplasmata;o__Methanomassiliicoccales;f__Methanomassiliicoccaceae;g__Methanomassiliicoccus_A;s__Methanomassiliicoccus_A intestinalis
GUT_GENOME010455	d__Archaea;p__Methanobacteriota;c__Methanobacteria;o__Methanobacteriales;f__Methanobacteriaceae;g__Methanobrevibacter_A;s__Methanobrevibacter_A smithii
GUT_GENOME011061	d__Archaea;p__Methanobacteriota;c__Methanobacteria;o__Methanobacteriales;f__Methanobacteriaceae;g__Methanobrevibacter_A;s__Methanobrevibacter_A smithii
GUT_GENOME011127	d__Archaea;p__Methanobacteriota;c__Methanobacteria;o__Methanobacteriales;f__Methanobacteriaceae;g__Methanobrevibacter_A;s__Methanobrevibacter_A smithii
GUT_GENOME011713	d__Archaea;p__Thermoplasmatota;c__Thermoplasmata;o__Methanomassiliicoccales;f__Methanomethylophilaceae;g__MX-02;s__MX-02 sp006954405
GUT_GENOME012531	d__Archaea;p__Methanobacteriota;c__Methanobacteria;o__Methanobacteriales;f__Methanobacteriaceae;g__Methanobrevibacter_A;s__Methanobrevibacter_A smithii
GUT_GENOME012629	d__Archaea;p__Thermoplasmatota;c__Thermoplasmata;o__Methanomassiliicoccales;f__Methanomethylophilaceae;g__UBA71;s__UBA71 sp006954465
GUT_GENOME012788	d__Archaea;p__Methanobacteriota;c__Methanobacteria;o__Methanobacteriales;f__Methanobacteriaceae;g__Methanobrevibacter_A;s__Methanobrevibacter_A smithii
GUT_GENOME013316	d__Archaea;p__Thermoplasmatota;c__Thermoplasmata;o__Methanomassiliicoccales;f__Methanomethylophilaceae;g__UBA71;s__UBA71 sp006954465
GUT_GENOME013945	d__Archaea;p__Thermoplasmatota;c__Thermoplasmata;o__Methanomassiliicoccales;f__Methanomethylophilaceae;g__UBA71;s__UBA71 sp006954465
GUT_GENOME014139	d__Archaea;p__Methanobacteriota;c__Methanobacteria;o__Methanobacteriales;f__Methanobacteriaceae;g__Methanobrevibacter_A;s__Methanobrevibacter_A smithii
GUT_GENOME014159	d__Archaea;p__Thermoplasmatota;c__Thermoplasmata;o__Methanomassiliicoccales;f__Methanomethylophilaceae;g__UBA71;s__UBA71 sp006954465
GUT_GENOME014213	d__Archaea;p__Thermoplasmatota;c__Thermoplasmata;o__Methanomassiliicoccales;f__Methanomethylophilaceae;g__UBA71;s__UBA71 sp006954465
GUT_GENOME014636	d__Archaea;p__Thermoplasmatota;c__Thermoplasmata;o__Methanomassiliicoccales;f__Methanomethylophilaceae;g__UBA71;s__UBA71 sp006954465
GUT_GENOME014892	d__Archaea;p__Methanobacteriota;c__Methanobacteria;o__Methanobacteriales;f__Methanobacteriaceae;g__Methanobrevibacter_A;s__Methanobrevibacter_A smithii
GUT_GENOME015150	d__Archaea;p__Thermoplasmatota;c__Thermoplasmata;o__Methanomassiliicoccales;f__Methanomethylophilaceae;g__UBA71;s__UBA71 sp006954465
GUT_GENOME017321	d__Archaea;p__Thermoplasmatota;c__Thermoplasmata;o__Methanomassiliicoccales;f__Methanomethylophilaceae;g__UBA71;s__
GUT_GENOME017996	d__Archaea;p__Methanobacteriota;c__Methanobacteria;o__Methanobacteriales;f__Methanobacteriaceae;g__Methanobrevibacter_A;s__Methanobrevibacter_A smithii
GUT_GENOME018227	d__Archaea;p__Methanobacteriota;c__Methanobacteria;o__Methanobacteriales;f__Methanobacteriaceae;g__Methanobrevibacter_A;s__Methanobrevibacter_A smithii
GUT_GENOME018608	d__Archaea;p__Methanobacteriota;c__Methanobacteria;o__Methanobacteriales;f__Methanobacteriaceae;g__Methanobrevibacter_A;s__Methanobrevibacter_A smithii
GUT_GENOME018729	d__Archaea;p__Methanobacteriota;c__Methanobacteria;o__Methanobacteriales;f__Methanobacteriaceae;g__Methanobrevibacter_A;s__Methanobrevibacter_A smithii
GUT_GENOME019172	d__Archaea;p__Methanobacteriota;c__Methanobacteria;o__Methanobacteriales;f__Methanobacteriaceae;g__Methanobrevibacter_A;s__Methanobrevibacter_A smithii
GUT_GENOME019331	d__Archaea;p__Methanobacteriota;c__Methanobacteria;o__Methanobacteriales;f__Methanobacteriaceae;g__Methanobrevibacter_A;s__Methanobrevibacter_A smithii
GUT_GENOME020562	d__Archaea;p__Methanobacteriota;c__Methanobacteria;o__Methanobacteriales;f__Methanobacteriaceae;g__Methanobrevibacter_A;s__Methanobrevibacter_A smithii_A
GUT_GENOME020722	d__Archaea;p__Methanobacteriota;c__Methanobacteria;o__Methanobacteriales;f__Methanobacteriaceae;g__Methanobrevibacter_A;s__Methanobrevibacter_A smithii
GUT_GENOME020734	d__Archaea;p__Thermoplasmatota;c__Thermoplasmata;o__Methanomassiliicoccales;f__Methanomethylophilaceae;g__MX-02;s__MX-02 sp006954405
GUT_GENOME020748	d__Archaea;p__Thermoplasmatota;c__Thermoplasmata;o__Methanomassiliicoccales;f__Methanomethylophilaceae;g__Methanomethylophilus;s__Methanomethylophilus alvus
GUT_GENOME020782	d__Archaea;p__Thermoplasmatota;c__Thermoplasmata;o__Methanomassiliicoccales;f__Methanomethylophilaceae;g__MX-02;s__MX-02 sp006954405
GUT_GENOME020819	d__Archaea;p__Methanobacteriota;c__Methanobacteria;o__Methanobacteriales;f__Methanobacteriaceae;g__Methanobrevibacter_A;s__Methanobrevibacter_A smithii
GUT_GENOME021825	d__Archaea;p__Methanobacteriota;c__Methanobacteria;o__Methanobacteriales;f__Methanobacteriaceae;g__Methanobrevibacter_A;s__Methanobrevibacter_A smithii
GUT_GENOME021873	d__Archaea;p__Methanobacteriota;c__Methanobacteria;o__Methanobacteriales;f__Methanobacteriaceae;g__Methanobrevibacter_A;s__Methanobrevibacter_A smithii
GUT_GENOME021902	d__Archaea;p__Methanobacteriota;c__Methanobacteria;o__Methanobacteriales;f__Methanobacteriaceae;g__Methanobrevibacter_A;s__Methanobrevibacter_A smithii
GUT_GENOME022135	d__Archaea;p__Methanobacteriota;c__Methanobacteria;o__Methanobacteriales;f__Methanobacteriaceae;g__Methanobrevibacter_A;s__Methanobrevibacter_A smithii
GUT_GENOME022256	d__Archaea;p__Methanobacteriota;c__Methanobacteria;o__Methanobacteriales;f__Methanobacteriaceae;g__Methanobrevibacter_A;s__Methanobrevibacter_A smithii
GUT_GENOME022400	d__Archaea;p__Thermoplasmatota;c__Thermoplasmata;o__Methanomassiliicoccales;f__Methanomethylophilaceae;g__UBA71;s__UBA71 sp006954465
GUT_GENOME023085	d__Archaea;p__Methanobacteriota;c__Methanobacteria;o__Methanobacteriales;f__Methanobacteriaceae;g__Methanobrevibacter_A;s__Methanobrevibacter_A smithii
GUT_GENOME023479	d__Archaea;p__Methanobacteriota;c__Methanobacteria;o__Methanobacteriales;f__Methanobacteriaceae;g__Methanobrevibacter_A;s__Methanobrevibacter_A smithii
GUT_GENOME024240	d__Archaea;p__Methanobacteriota;c__Methanobacteria;o__Methanobacteriales;f__Methanobacteriaceae;g__Methanobrevibacter_A;s__
GUT_GENOME025584	d__Archaea;p__Methanobacteriota;c__Methanobacteria;o__Methanobacteriales;f__Methanobacteriaceae;g__Methanobrevibacter_A;s__Methanobrevibacter_A smithii
GUT_GENOME025919	d__Archaea;p__Thermoplasmatota;c__Thermoplasmata;o__Methanomassiliicoccales;f__Methanomethylophilaceae;g__UBA71;s__UBA71 sp006954465
GUT_GENOME025992	d__Archaea;p__Methanobacteriota;c__Methanobacteria;o__Methanobacteriales;f__Methanobacteriaceae;g__Methanobrevibacter_A;s__Methanobrevibacter_A smithii
GUT_GENOME026699	d__Archaea;p__Thermoplasmatota;c__Thermoplasmata;o__Methanomassiliicoccales;f__Methanomethylophilaceae;g__UBA71;s__UBA71 sp006954465
GUT_GENOME029030	d__Archaea;p__Methanobacteriota;c__Methanobacteria;o__Methanobacteriales;f__Methanobacteriaceae;g__Methanobrevibacter_A;s__Methanobrevibacter_A smithii
GUT_GENOME029369	d__Archaea;p__Methanobacteriota;c__Methanobacteria;o__Methanobacteriales;f__Methanobacteriaceae;g__Methanobrevibacter_A;s__Methanobrevibacter_A smithii
GUT_GENOME029865	d__Archaea;p__Methanobacteriota;c__Methanobacteria;o__Methanobacteriales;f__Methanobacteriaceae;g__Methanobrevibacter_A;s__Methanobrevibacter_A smithii
GUT_GENOME030862	d__Archaea;p__Methanobacteriota;c__Methanobacteria;o__Methanobacteriales;f__Methanobacteriaceae;g__Methanobrevibacter_A;s__Methanobrevibacter_A smithii
GUT_GENOME031842	d__Archaea;p__Methanobacteriota;c__Methanobacteria;o__Methanobacteriales;f__Methanobacteriaceae;g__Methanobrevibacter_A;s__Methanobrevibacter_A smithii
GUT_GENOME033967	d__Archaea;p__Methanobacteriota;c__Methanobacteria;o__Methanobacteriales;f__Methanobacteriaceae;g__Methanobrevibacter_A;s__Methanobrevibacter_A smithii
GUT_GENOME037337	d__Archaea;p__Methanobacteriota;c__Methanobacteria;o__Methanobacteriales;f__Methanobacteriaceae;g__Methanobrevibacter_A;s__Methanobrevibacter_A smithii
GUT_GENOME039530	d__Archaea;p__Methanobacteriota;c__Methanobacteria;o__Methanobacteriales;f__Methanobacteriaceae;g__Methanobrevibacter_A;s__Methanobrevibacter_A smithii
GUT_GENOME039548	d__Archaea;p__Methanobacteriota;c__Methanobacteria;o__Methanobacteriales;f__Methanobacteriaceae;g__Methanobrevibacter_A;s__Methanobrevibacter_A smithii
GUT_GENOME040387	d__Archaea;p__Methanobacteriota;c__Methanobacteria;o__Methanobacteriales;f__Methanobacteriaceae;g__Methanobrevibacter_A;s__Methanobrevibacter_A smithii
GUT_GENOME040421	d__Archaea;p__Methanobacteriota;c__Methanobacteria;o__Methanobacteriales;f__Methanobacteriaceae;g__Methanobrevibacter_A;s__Methanobrevibacter_A smithii
GUT_GENOME041778	d__Archaea;p__Methanobacteriota;c__Methanobacteria;o__Methanobacteriales;f__Methanobacteriaceae;g__Methanobrevibacter_A;s__Methanobrevibacter_A smithii_A
GUT_GENOME041786	d__Archaea;p__Methanobacteriota;c__Methanobacteria;o__Methanobacteriales;f__Methanobacteriaceae;g__Methanobrevibacter_A;s__Methanobrevibacter_A smithii_A
GUT_GENOME041800	d__Archaea;p__Methanobacteriota;c__Methanobacteria;o__Methanobacteriales;f__Methanobacteriaceae;g__Methanobrevibacter_A;s__Methanobrevibacter_A smithii_A
GUT_GENOME043902	d__Archaea;p__Methanobacteriota;c__Methanobacteria;o__Methanobacteriales;f__Methanobacteriaceae;g__Methanobrevibacter_A;s__Methanobrevibacter_A smithii_A
GUT_GENOME044077	d__Archaea;p__Thermoplasmatota;c__Thermoplasmata;o__Methanomassiliicoccales;f__Methanomethylophilaceae;g__Methanomethylophilus;s__Methanomethylophilus alvus
GUT_GENOME046615	d__Archaea;p__Methanobacteriota;c__Methanobacteria;o__Methanobacteriales;f__Methanobacteriaceae;g__Methanobrevibacter_A;s__Methanobrevibacter_A smithii
GUT_GENOME047661	d__Archaea;p__Methanobacteriota;c__Methanobacteria;o__Methanobacteriales;f__Methanobacteriaceae;g__Methanobrevibacter_A;s__Methanobrevibacter_A smithii
GUT_GENOME047676	d__Archaea;p__Methanobacteriota;c__Methanobacteria;o__Methanobacteriales;f__Methanobacteriaceae;g__Methanobrevibacter_A;s__Methanobrevibacter_A smithii
GUT_GENOME047694	d__Archaea;p__Methanobacteriota;c__Methanobacteria;o__Methanobacteriales;f__Methanobacteriaceae;g__Methanobrevibacter_A;s__Methanobrevibacter_A smithii
GUT_GENOME048336	d__Archaea;p__Methanobacteriota;c__Methanobacteria;o__Methanobacteriales;f__Methanobacteriaceae;g__Methanobrevibacter_A;s__Methanobrevibacter_A smithii
GUT_GENOME048380	d__Archaea;p__Methanobacteriota;c__Methanobacteria;o__Methanobacteriales;f__Methanobacteriaceae;g__Methanobrevibacter_A;s__Methanobrevibacter_A smithii
GUT_GENOME048709	d__Archaea;p__Methanobacteriota;c__Methanobacteria;o__Methanobacteriales;f__Methanobacteriaceae;g__Methanobrevibacter_A;s__Methanobrevibacter_A smithii
GUT_GENOME048728	d__Archaea;p__Methanobacteriota;c__Methanobacteria;o__Methanobacteriales;f__Methanobacteriaceae;g__Methanobrevibacter_A;s__Methanobrevibacter_A smithii
GUT_GENOME051178	d__Archaea;p__Methanobacteriota;c__Methanobacteria;o__Methanobacteriales;f__Methanobacteriaceae;g__Methanobrevibacter_A;s__Methanobrevibacter_A smithii
GUT_GENOME052138	d__Archaea;p__Methanobacteriota;c__Methanobacteria;o__Methanobacteriales;f__Methanobacteriaceae;g__Methanobrevibacter_A;s__Methanobrevibacter_A smithii
GUT_GENOME052922	d__Archaea;p__Methanobacteriota;c__Methanobacteria;o__Methanobacteriales;f__Methanobacteriaceae;g__Methanobrevibacter_A;s__Methanobrevibacter_A smithii
GUT_GENOME052932	d__Archaea;p__Methanobacteriota;c__Methanobacteria;o__Methanobacteriales;f__Methanobacteriaceae;g__Methanobrevibacter_A;s__Methanobrevibacter_A smithii
GUT_GENOME055436	d__Archaea;p__Methanobacteriota;c__Methanobacteria;o__Methanobacteriales;f__Methanobacteriaceae;g__Methanobrevibacter_A;s__Methanobrevibacter_A smithii
GUT_GENOME055714	d__Archaea;p__Methanobacteriota;c__Methanobacteria;o__Methanobacteriales;f__Methanobacteriaceae;g__Methanobrevibacter_A;s__Methanobrevibacter_A smithii_A
GUT_GENOME056822	d__Archaea;p__Methanobacteriota;c__Methanobacteria;o__Methanobacteriales;f__Methanobacteriaceae;g__Methanobrevibacter_A;s__Methanobrevibacter_A smithii
GUT_GENOME057256	d__Archaea;p__Methanobacteriota;c__Methanobacteria;o__Methanobacteriales;f__Methanobacteriaceae;g__Methanobrevibacter_A;s__Methanobrevibacter_A smithii
GUT_GENOME057805	d__Archaea;p__Methanobacteriota;c__Methanobacteria;o__Methanobacteriales;f__Methanobacteriaceae;g__Methanobrevibacter_A;s__Methanobrevibacter_A smithii
GUT_GENOME057829	d__Archaea;p__Methanobacteriota;c__Methanobacteria;o__Methanobacteriales;f__Methanobacteriaceae;g__Methanobrevibacter_A;s__Methanobrevibacter_A smithii
GUT_GENOME057858	d__Archaea;p__Methanobacteriota;c__Methanobacteria;o__Methanobacteriales;f__Methanobacteriaceae;g__Methanobrevibacter_A;s__Methanobrevibacter_A smithii
GUT_GENOME057915	d__Archaea;p__Methanobacteriota;c__Methanobacteria;o__Methanobacteriales;f__Methanobacteriaceae;g__Methanobrevibacter_A;s__Methanobrevibacter_A smithii
GUT_GENOME057995	d__Archaea;p__Methanobacteriota;c__Methanobacteria;o__Methanobacteriales;f__Methanobacteriaceae;g__Methanobrevibacter_A;s__Methanobrevibacter_A smithii
GUT_GENOME058005	d__Archaea;p__Methanobacteriota;c__Methanobacteria;o__Methanobacteriales;f__Methanobacteriaceae;g__Methanobrevibacter_A;s__Methanobrevibacter_A smithii
GUT_GENOME058117	d__Archaea;p__Methanobacteriota;c__Methanobacteria;o__Methanobacteriales;f__Methanobacteriaceae;g__Methanobrevibacter_A;s__Methanobrevibacter_A smithii
GUT_GENOME058140	d__Archaea;p__Methanobacteriota;c__Methanobacteria;o__Methanobacteriales;f__Methanobacteriaceae;g__Methanobrevibacter_A;s__Methanobrevibacter_A smithii
GUT_GENOME058172	d__Archaea;p__Methanobacteriota;c__Methanobacteria;o__Methanobacteriales;f__Methanobacteriaceae;g__Methanobrevibacter_A;s__Methanobrevibacter_A smithii
GUT_GENOME059256	d__Archaea;p__Methanobacteriota;c__Methanobacteria;o__Methanobacteriales;f__Methanobacteriaceae;g__Methanobrevibacter_A;s__Methanobrevibacter_A smithii
GUT_GENOME060823	d__Archaea;p__Methanobacteriota;c__Methanobacteria;o__Methanobacteriales;f__Methanobacteriaceae;g__Methanobrevibacter_A;s__Methanobrevibacter_A smithii
GUT_GENOME061502	d__Archaea;p__Methanobacteriota;c__Methanobacteria;o__Methanobacteriales;f__Methanobacteriaceae;g__Methanobrevibacter_A;s__Methanobrevibacter_A smithii_A
GUT_GENOME061699	d__Archaea;p__Methanobacteriota;c__Methanobacteria;o__Methanobacteriales;f__Methanobacteriaceae;g__Methanobrevibacter_A;s__Methanobrevibacter_A smithii
GUT_GENOME062449	d__Archaea;p__Methanobacteriota;c__Methanobacteria;o__Methanobacteriales;f__Methanobacteriaceae;g__Methanobrevibacter_A;s__Methanobrevibacter_A smithii
GUT_GENOME064289	d__Archaea;p__Methanobacteriota;c__Methanobacteria;o__Methanobacteriales;f__Methanobacteriaceae;g__Methanobrevibacter_A;s__Methanobrevibacter_A smithii_A
GUT_GENOME064456	d__Archaea;p__Methanobacteriota;c__Methanobacteria;o__Methanobacteriales;f__Methanobacteriaceae;g__Methanobrevibacter_A;s__Methanobrevibacter_A smithii
GUT_GENOME064523	d__Archaea;p__Methanobacteriota;c__Methanobacteria;o__Methanobacteriales;f__Methanobacteriaceae;g__Methanobrevibacter_A;s__Methanobrevibacter_A smithii
GUT_GENOME064657	d__Archaea;p__Methanobacteriota;c__Methanobacteria;o__Methanobacteriales;f__Methanobacteriaceae;g__Methanobrevibacter_A;s__Methanobrevibacter_A smithii_A
GUT_GENOME064731	d__Archaea;p__Methanobacteriota;c__Methanobacteria;o__Methanobacteriales;f__Methanobacteriaceae;g__Methanobrevibacter_A;s__Methanobrevibacter_A smithii
GUT_GENOME064905	d__Archaea;p__Methanobacteriota;c__Methanobacteria;o__Methanobacteriales;f__Methanobacteriaceae;g__Methanobrevibacter_A;s__Methanobrevibacter_A smithii_A
GUT_GENOME065556	d__Archaea;p__Methanobacteriota;c__Methanobacteria;o__Methanobacteriales;f__Methanobacteriaceae;g__Methanobrevibacter_A;s__Methanobrevibacter_A smithii_A
GUT_GENOME065782	d__Archaea;p__Methanobacteriota;c__Methanobacteria;o__Methanobacteriales;f__Methanobacteriaceae;g__Methanobrevibacter_A;s__Methanobrevibacter_A smithii_A
GUT_GENOME066320	d__Archaea;p__Methanobacteriota;c__Methanobacteria;o__Methanobacteriales;f__Methanobacteriaceae;g__Methanobrevibacter_A;s__Methanobrevibacter_A smithii_A
GUT_GENOME066393	d__Archaea;p__Methanobacteriota;c__Methanobacteria;o__Methanobacteriales;f__Methanobacteriaceae;g__Methanobrevibacter_A;s__Methanobrevibacter_A smithii_A
GUT_GENOME066427	d__Archaea;p__Methanobacteriota;c__Methanobacteria;o__Methanobacteriales;f__Methanobacteriaceae;g__Methanobrevibacter_A;s__Methanobrevibacter_A smithii
GUT_GENOME066684	d__Archaea;p__Methanobacteriota;c__Methanobacteria;o__Methanobacteriales;f__Methanobacteriaceae;g__Methanobrevibacter_A;s__Methanobrevibacter_A smithii
GUT_GENOME067098	d__Archaea;p__Methanobacteriota;c__Methanobacteria;o__Methanobacteriales;f__Methanobacteriaceae;g__Methanosphaera;s__Methanosphaera stadtmanae
GUT_GENOME067209	d__Archaea;p__Methanobacteriota;c__Methanobacteria;o__Methanobacteriales;f__Methanobacteriaceae;g__Methanobrevibacter_A;s__Methanobrevibacter_A smithii
GUT_GENOME067252	d__Archaea;p__Methanobacteriota;c__Methanobacteria;o__Methanobacteriales;f__Methanobacteriaceae;g__Methanobrevibacter_A;s__Methanobrevibacter_A smithii_A
GUT_GENOME067420	d__Archaea;p__Methanobacteriota;c__Methanobacteria;o__Methanobacteriales;f__Methanobacteriaceae;g__Methanobrevibacter_A;s__Methanobrevibacter_A smithii
GUT_GENOME067512	d__Archaea;p__Methanobacteriota;c__Methanobacteria;o__Methanobacteriales;f__Methanobacteriaceae;g__Methanobrevibacter_A;s__Methanobrevibacter_A smithii
GUT_GENOME067559	d__Archaea;p__Methanobacteriota;c__Methanobacteria;o__Methanobacteriales;f__Methanobacteriaceae;g__Methanobrevibacter_A;s__Methanobrevibacter_A smithii_A
GUT_GENOME067877	d__Archaea;p__Methanobacteriota;c__Methanobacteria;o__Methanobacteriales;f__Methanobacteriaceae;g__Methanobrevibacter_A;s__Methanobrevibacter_A smithii
GUT_GENOME067949	d__Archaea;p__Methanobacteriota;c__Methanobacteria;o__Methanobacteriales;f__Methanobacteriaceae;g__Methanobrevibacter_A;s__Methanobrevibacter_A smithii
GUT_GENOME067999	d__Archaea;p__Methanobacteriota;c__Methanobacteria;o__Methanobacteriales;f__Methanobacteriaceae;g__Methanobrevibacter_A;s__Methanobrevibacter_A smithii
GUT_GENOME068037	d__Archaea;p__Methanobacteriota;c__Methanobacteria;o__Methanobacteriales;f__Methanobacteriaceae;g__Methanobrevibacter_A;s__Methanobrevibacter_A smithii
GUT_GENOME068080	d__Archaea;p__Methanobacteriota;c__Methanobacteria;o__Methanobacteriales;f__Methanobacteriaceae;g__Methanobrevibacter_A;s__Methanobrevibacter_A smithii_A
GUT_GENOME068103	d__Archaea;p__Methanobacteriota;c__Methanobacteria;o__Methanobacteriales;f__Methanobacteriaceae;g__Methanobrevibacter_A;s__Methanobrevibacter_A smithii
GUT_GENOME068190	d__Archaea;p__Methanobacteriota;c__Methanobacteria;o__Methanobacteriales;f__Methanobacteriaceae;g__Methanobrevibacter_A;s__Methanobrevibacter_A smithii
GUT_GENOME068201	d__Archaea;p__Methanobacteriota;c__Methanobacteria;o__Methanobacteriales;f__Methanobacteriaceae;g__Methanobrevibacter_A;s__Methanobrevibacter_A smithii
GUT_GENOME068355	d__Archaea;p__Methanobacteriota;c__Methanobacteria;o__Methanobacteriales;f__Methanobacteriaceae;g__Methanobrevibacter_A;s__Methanobrevibacter_A smithii
GUT_GENOME068480	d__Archaea;p__Methanobacteriota;c__Methanobacteria;o__Methanobacteriales;f__Methanobacteriaceae;g__Methanobrevibacter_A;s__Methanobrevibacter_A smithii_A
GUT_GENOME068622	d__Archaea;p__Methanobacteriota;c__Methanobacteria;o__Methanobacteriales;f__Methanobacteriaceae;g__Methanobrevibacter_A;s__Methanobrevibacter_A smithii
GUT_GENOME068717	d__Archaea;p__Methanobacteriota;c__Methanobacteria;o__Methanobacteriales;f__Methanobacteriaceae;g__Methanobrevibacter_A;s__Methanobrevibacter_A smithii
GUT_GENOME070359	d__Archaea;p__Methanobacteriota;c__Methanobacteria;o__Methanobacteriales;f__Methanobacteriaceae;g__Methanobrevibacter_A;s__Methanobrevibacter_A smithii
GUT_GENOME073874	d__Archaea;p__Methanobacteriota;c__Methanobacteria;o__Methanobacteriales;f__Methanobacteriaceae;g__Methanobrevibacter_A;s__Methanobrevibacter_A smithii
GUT_GENOME074072	d__Archaea;p__Methanobacteriota;c__Methanobacteria;o__Methanobacteriales;f__Methanobacteriaceae;g__Methanobrevibacter_A;s__Methanobrevibacter_A smithii
GUT_GENOME074412	d__Archaea;p__Methanobacteriota;c__Methanobacteria;o__Methanobacteriales;f__Methanobacteriaceae;g__Methanobrevibacter_A;s__Methanobrevibacter_A smithii
GUT_GENOME074541	d__Archaea;p__Methanobacteriota;c__Methanobacteria;o__Methanobacteriales;f__Methanobacteriaceae;g__Methanobrevibacter_A;s__Methanobrevibacter_A smithii
GUT_GENOME075229	d__Archaea;p__Methanobacteriota;c__Methanobacteria;o__Methanobacteriales;f__Methanobacteriaceae;g__Methanobrevibacter_A;s__Methanobrevibacter_A smithii
GUT_GENOME076374	d__Archaea;p__Methanobacteriota;c__Methanobacteria;o__Methanobacteriales;f__Methanobacteriaceae;g__Methanobrevibacter_A;s__Methanobrevibacter_A smithii
[truncated: 705 more rows]
