# Supplementary material for: Metagenomic analysis reveals unexplored diversity of archaeal virome in the human gut
Source: Nat Commun. 2022 Dec 29;13:7978. doi: 10.1038/s41467-022-35735-y (PMC9800368; doi:10.1038/s41467-022-35735-y)
Supplement: Supplementary file 8 — Data 4 [file 41467_2022_35735_MOESM8_ESM.xlsx]

## Sheet: a. metadata of 1904 individuals
Batch	Sample	Gender	Lifestyle	Continent	Country	Age	Health_status	BMI	BMI1
twins	35365	F		Europe	UK	61.9521		38.3537	obesity
twins	35366	F		Europe	UK	61.9521		40.9878	obesity
twins	35387	F		Europe	UK	49.8919		19.6889	normal
twins	35388	F		Europe	UK	49.8919		24.7136	normal
twins	35389	F		Europe	UK	64.7967		20.4825	normal
twins	35390	F		Europe	UK	64.7967		20.538	normal
twins	35391	F		Europe	UK	65.4538		21.4232	normal
twins	35392	F		Europe	UK	65.4538		27.526	overweight
twins	35505	F		Europe	UK	42.1273		22.4284	normal
twins	35506	F		Europe	UK	42.1273		21.5744	normal
twins	35511	F		Europe	UK	66.6338		24.1097	normal
twins	35512	F		Europe	UK	66.6338		27.7728	overweight
twins	35515	F		Europe	UK	56.1424		29.3786	overweight
twins	35516	F		Europe	UK	56.1424		31.6367	obesity
twins	35519	F		Europe	UK	72.0465		31.8402	obesity
twins	35520	F		Europe	UK	72.0493		21.8426	normal
twins	35523	F		Europe	UK	52.9665		25.7202	overweight
twins	35524	F		Europe	UK	52.9665		23.7741	normal
twins	35541	F		Europe	UK	49.1253		27.0312	overweight
twins	35542	F		Europe	UK	49.1253		26.3781	overweight
twins	35549	F		Europe	UK	72.7036		24.5906	normal
twins	35550	F		Europe	UK	72.7036		25.0858	overweight
twins	35551	F		Europe	UK	60.8104		22.7011	normal
twins	35552	F		Europe	UK	60.8104		20.4688	normal
twins	35561	F		Europe	UK	68.2847		23.2466	normal
twins	35562	F		Europe	UK	68.2847		25.4543	overweight
twins	35563	F		Europe	UK	61.347		44.8285	obesity
twins	35564	F		Europe	UK	61.347		35.371	obesity
twins	35577	F		Europe	UK	59.4689		38.0469	obesity
twins	35578	F		Europe	UK	59.4689		31.7982	obesity
twins	35583	F		Europe	UK	59.5838		27.3413	overweight
twins	35629	F		Europe	UK	63.1677		33.0837	obesity
twins	35630	F		Europe	UK	63.1677		23.594	normal
twins	35635	F		Europe	UK	66.0178		22.6989	normal
twins	35636	F		Europe	UK	66.0178		22.7794	normal
twins	35653	F		Europe	UK	54.0507		21.7873	normal
twins	35654	F		Europe	UK	54.0507		24.9258	overweight
twins	35657	F		Europe	UK	72.8159		28.3654	overweight
twins	35658	F		Europe	UK	72.8159		27.9567	overweight
twins	35665	F		Europe	UK	64.3094		25.0102	overweight
twins	35666	F		Europe	UK	64.3094		24.4031	normal
twins	35697	F		Europe	UK	69.2868		22.7638	normal
twins	35698	F		Europe	UK	69.2868		22.3453	normal
twins	35703	F		Europe	UK	62.8638		22.5231	normal
twins	35704	F		Europe	UK	62.8638		22.6049	normal
twins	35705	F		Europe	UK	68.2108		31.6753	obesity
twins	35706	F		Europe	UK	68.2108		26.2864	overweight
twins	35707	F		Europe	UK	68.8953		19.1344	normal
twins	35708	F		Europe	UK	68.8953		20.484	normal
twins	35712	F		Europe	UK	64.0329		35.9551	obesity
twins	35723	F		Europe	UK	63.9808		24.2559	normal
twins	35724	F		Europe	UK	63.9808		23.3479	normal
twins	35733	F		Europe	UK	68.1862		24.0735	normal
twins	35734	F		Europe	UK	68.1862		25.094	overweight
twins	35739	F		Europe	UK	67.8029		19.9148	normal
twins	35740	F		Europe	UK	67.8029		24.8748	normal
twins	35741	F		Europe	UK	47.6386		20.4949	normal
twins	35742	F		Europe	UK	47.6413		24.406	normal
twins	35837	F		Europe	UK	64.6626		21.1427	normal
twins	35838	F		Europe	UK	64.6626
twins	35979	F		Europe	UK	54.037		21.3149	normal
twins	35980	F		Europe	UK	54.037		23.2708	normal
twins	35989	F		Europe	UK	50.4066		25.5228	overweight
twins	35990	F		Europe	UK	50.4066		21.014	normal
twins	35991	F		Europe	UK	57.4155		23.6488	normal
twins	35992	F		Europe	UK	57.4155		23.6634	normal
twins	35999	F		Europe	UK	55.9836		27.4976	overweight
twins	36000	F		Europe	UK	55.9836		27.7927	overweight
twins	36005	F		Europe	UK	73.4456		20.8466	normal
twins	36006	F		Europe	UK	73.4456		21.6511	normal
twins	36007	F		Europe	UK	50.5462		23.9438	normal
twins	36008	F		Europe	UK	50.5462		22.486	normal
twins	36011	F		Europe	UK	70.7652		23.8711	normal
twins	36012	F		Europe	UK	70.7652		23.3306	normal
twins	36019	F		Europe	UK	69.5222		28.3266	overweight
twins	36020	F		Europe	UK	69.5222		21.3001	normal
twins	36033	F		Europe	UK	68.5257		18.2531	underweight
twins	36034	F		Europe	UK	68.5257		22.9375	normal
twins	36049	F		Europe	UK	70.3819		26.3656	overweight
twins	36050	F		Europe	UK	70.3819		22.3069	normal
twins	36051	F		Europe	UK	60.9911		22.8329	normal
twins	36052	F		Europe	UK	60.9911		23.4768	normal
twins	36055	F		Europe	UK	41.5551		23.9158	normal
twins	36056	F		Europe	UK	41.5551		23.193	normal
twins	36057	F		Europe	UK	69.0678		31.5214	obesity
twins	36058	F		Europe	UK	69.065		27.9367	overweight
twins	36116	F		Europe	UK	55.896		33.7857	obesity
twins	36117	F		Europe	UK	55.896		35.9903	obesity
twins	36118	F		Europe	UK	77.1745		22.2804	normal
twins	36119	F		Europe	UK	77.1745		20.0163	normal
twins	36157	F		Europe	UK	79.666		30.0358	obesity
twins	36158	F		Europe	UK	79.666		27.2874	overweight
twins	36211	F		Europe	UK	62.5955		23.1795	normal
twins	36212	F		Europe	UK	62.5955		20.2113	normal
twins	36243	F		Europe	UK	76.3313		32.0141	obesity
twins	36244	F		Europe	UK	76.3313		22.9488	normal
twins	36389	F		Europe	UK	60.9774		31.3472	obesity
twins	36390	F		Europe	UK	60.9774		25.3411	overweight
twins	36439	F		Europe	UK	71.729		28.7891	overweight
twins	36440	F		Europe	UK	71.729		27.7686	overweight
twins	36453	F		Europe	UK	59.729		26.0586	overweight
twins	36454	F		Europe	UK	59.729		28.652	overweight
twins	36473	F		Europe	UK	35.7125		24.7051	normal
twins	36474	F		Europe	UK	35.7125		19.3625	normal
twins	36521	F		Europe	UK	73.399		28.4753	overweight
twins	36522	F		Europe	UK	73.399		27.438	overweight
twins	36525	F		Europe	UK	64.5613		23.8076	normal
twins	36526	F		Europe	UK	64.5613		24.8692	normal
twins	36533	F		Europe	UK	52.0137		28.0445	overweight
twins	36534	F		Europe	UK	52.0137		21.4776	normal
twins	36587	F		Europe	UK	62.36		22.0718	normal
twins	36588	F		Europe	UK	62.36		20.8415	normal
twins	36666	F		Europe	UK	56.1944		21.0171	normal
twins	36667	F		Europe	UK	56.1944		21.4438	normal
twins	36674	F		Europe	UK	78.2971		27.7753	overweight
twins	36675	F		Europe	UK	78.2971		26.2378	overweight
twins	36694	F		Europe	UK	42.7351		23.0469	normal
twins	36695	F		Europe	UK	42.7351		30.3288	obesity
twins	36696	F		Europe	UK	71.1814		26.3535	overweight
twins	36697	F		Europe	UK	71.1814		24.8192	normal
twins	36698	F		Europe	UK	49.525		22.782	normal
twins	36699	F		Europe	UK	49.525		23.9377	normal
twins	36702	F		Europe	UK	61.7823		21.1525	normal
twins	36703	F		Europe	UK	61.7823		22.8405	normal
twins	36794	F		Europe	UK	55.8494		28.0494	overweight
twins	36795	F		Europe	UK	55.8494		32.3047	obesity
twins	36981	F		Europe	UK	49.6893		32.8305	obesity
twins	36982	F		Europe	UK	49.6893		33.7768	obesity
twins	37096	F		Europe	UK	64.4517		35.7495	obesity
twins	37097	F		Europe	UK	64.4517		32.8933	obesity
twins	37100	F		Europe	UK	62.9076		20.4631	normal
twins	37101	F		Europe	UK	62.9076		19.5051	normal
twins	37102	F		Europe	UK	63.2909		27.322	overweight
twins	37103	F		Europe	UK	63.2909		30.5568	obesity
twins	37105	F		Europe	UK	64.6461		24.8585	normal
twins	37126	F		Europe	UK	47.4908		21.5665	normal
twins	37127	F		Europe	UK	47.4908		25.6392	overweight
twins	37133	F		Europe	UK	61.7303		35.7128	obesity
twins	37134	F		Europe	UK	61.7303		28.4341	overweight
twins	37135	F		Europe	UK	38.3326		23.9567	normal
twins	37136	F		Europe	UK	38.3326		26.1816	overweight
twins	37137	F		Europe	UK	51.1704		25.3029	overweight
twins	37138	F		Europe	UK	51.1704		24.789	normal
twins	37171	F		Europe	UK	59.206		32.8865	obesity
twins	37172	F		Europe	UK	59.206		23.0501	normal
twins	37173	F		Europe	UK	53.7248		24.8902	normal
twins	37174	F		Europe	UK	53.7248		33.8281	obesity
twins	37175	F		Europe	UK	54.8282		26.9238	overweight
twins	37176	F		Europe	UK	54.8282		23.8248	normal
twins	37179	F		Europe	UK	60.178		27.5056	overweight
twins	37181	F		Europe	UK	64.4627		26.4697	overweight
twins	37182	F		Europe	UK	64.4627		24.2424	normal
twins	37189	F		Europe	UK	48.5804		35.3045	obesity
twins	37190	F		Europe	UK	48.5804		34.4935	obesity
twins	37191	F		Europe	UK	61.0048		32.647	obesity
twins	37192	F		Europe	UK	61.0048		33.5244	obesity
twins	37193	F		Europe	UK	69.6427		23.0584	normal
twins	37194	F		Europe	UK	69.6427		26.6432	overweight
twins	37195	F		Europe	UK	59.6167		29.0861	overweight
twins	37196	F		Europe	UK	59.6167		26.9214	overweight
twins	37197	F		Europe	UK	57.9904		22.1115	normal
twins	37198	F		Europe	UK	57.9904		23.1038	normal
twins	37199	F		Europe	UK	59.2526		25.0028	overweight
twins	37200	F		Europe	UK	59.2526		33.1403	obesity
twins	37201	F		Europe	UK	46.1875		33.0922	obesity
twins	37202	F		Europe	UK	46.1875		32.6938	obesity
twins	37203	F		Europe	UK	60.9884		31.1301	obesity
twins	37204	F		Europe	UK	60.9884		34.0785	obesity
twins	37205	F		Europe	UK	64.8487		27.5391	overweight
twins	37206	F		Europe	UK	64.8487		22.8462	normal
twins	37207	F		Europe	UK	65.0815		27.8222	overweight
twins	37208	F		Europe	UK	65.0815		22.2596	normal
twins	37209	F		Europe	UK	46.5161		23.2874	normal
twins	37210	F		Europe	UK	46.5161		24.0955	normal
twins	37222	F		Europe	UK	55.7454		23.6926	normal
twins	37223	F		Europe	UK	55.7454		27.4368	overweight
twins	37228	F		Europe	UK	55.1951		34.7014	obesity
twins	37229	F		Europe	UK	55.1951		28.257	overweight
twins	37232	F		Europe	UK	50.642		25.2818	overweight
twins	37233	F		Europe	UK	50.642		27.268	overweight
twins	37254	F		Europe	UK	66.642		24.3531	normal
twins	37255	F		Europe	UK	66.642		23.9	normal
twins	37264	F		Europe	UK	51.8357		26.7848	overweight
twins	37265	F		Europe	UK	51.8357		28.3645	overweight
twins	37268	F		Europe	UK	62.1218		22.3886	normal
twins	37269	F		Europe	UK	62.1218		32.9599	obesity
twins	37270	F		Europe	UK	64.6105		27.4066	overweight
twins	37271	F		Europe	UK	64.6105		39.8508	obesity
twins	37276	F		Europe	UK	69.5551		16.1665	underweight
twins	37277	F		Europe	UK	69.5633		19.2806	normal
twins	37282	F		Europe	UK	62.3436		33.7623	obesity
twins	37283	F		Europe	UK	62.3436		30.3871	obesity
twins	37284	F		Europe	UK	61.7221		25.4187	overweight
twins	37285	F		Europe	UK	61.7221		22.4261	normal
twins	37286	F		Europe	UK	64.2847		27.5551	overweight
twins	37287	F		Europe	UK	64.2847		30.5234	obesity
twins	37292	F		Europe	UK	57.1472		23.0701	normal
twins	37293	F		Europe	UK	57.1472		24.0346	normal
twins	37296	F		Europe	UK	62.5544		34.3321	obesity
twins	37297	F		Europe	UK	62.5544		27.2899	overweight
twins	37298	F		Europe	UK	57.1581		23.2022	normal
twins	37299	F		Europe	UK	57.1581		24.6212	normal
twins	37304	F		Europe	UK	63.8905		28.4375	overweight
twins	37305	F		Europe	UK	63.8905		28.4874	overweight
twins	37308	F		Europe	UK	62.3819		23.3739	normal
twins	37309	F		Europe	UK	62.3819		19.0629	normal
twins	37314	F		Europe	UK	69.1362		17.7619	underweight
twins	37315	F		Europe	UK	69.1362		18.1359	underweight
twins	37316	F		Europe	UK	68.6242		23.7824	normal
twins	37317	F		Europe	UK	68.6242		24.6319	normal
twins	37322	F		Europe	UK	56.2355		27.9337	overweight
twins	37323	F		Europe	UK	56.2355		20.5953	normal
twins	37330	F		Europe	UK	65.7084		30.7793	obesity
twins	37331	F		Europe	UK	65.7084		27.7567	overweight
twins	37332	F		Europe	UK	67.4387		24.6044	normal
twins	37333	F		Europe	UK	67.4387		28.7431	overweight
twins	37336	F		Europe	UK	64.9966		21.6845	normal
twins	37337	F		Europe	UK	64.9966		20.0784	normal
twins	37348	F		Europe	UK	50.6201		26.3463	overweight
twins	37349	F		Europe	UK	50.6201		22.1367	normal
twins	37352	F		Europe	UK	64.501		24.6598	normal
twins	37353	F		Europe	UK	64.501		24.025	normal
twins	37393	F		Europe	UK	67.0445		23.1067	normal
twins	37394	F		Europe	UK	67.0445		24.6156	normal
twins	37399	F		Europe	UK	51.7153		19.4034	normal
twins	37400	F		Europe	UK	51.7153		23.2049	normal
twins	37405	F		Europe	UK	62.0205		21.0269	normal
twins	37406	F		Europe	UK	62.0205		27.7193	overweight
twins	37461	F		Europe	UK	79.1978		24.0074	normal
twins	37462	F		Europe	UK	79.1978		22.4183	normal
twins	37543	F		Europe	UK	64.6242		29.891	overweight
twins	37544	F		Europe	UK	64.6242		27.847	overweight
twins	37545	F		Europe	UK	65.87		31.5711	obesity
twins	37546	F		Europe	UK	65.87		29.2257	overweight
twins	37583	F		Europe	UK	72.6516		22.3457	normal
twins	37584	F		Europe	UK	72.6516		25.8697	overweight
twins	37647	F		Europe	UK	64.5311		21.2874	normal
twins	37648	F		Europe	UK	64.5311		19.9949	normal
twins	37651	F		Europe	UK	65.0349		22.4359	normal
twins	37652	F		Europe	UK	65.0349		23.6635	normal
twins	37753	F		Europe	UK	58.694		22.6274	normal
twins	37754	F		Europe	UK	58.694		29.2951	overweight
twins	37797	F		Europe	UK	59.948		25.3165	overweight
twins	37798	F		Europe	UK	59.948		24.4057	normal
twins	37829	F		Europe	UK	71.8138		23.9941	normal
twins	37830	F		Europe	UK	71.8138		24.5094	normal
twins	37877	F		Europe	UK	47.4278		20.9727	normal
twins	37878	F		Europe	UK	47.4278		22.0018	normal
twins	37879	F		Europe	UK	41.9357		23.8321	normal
twins	37880	F		Europe	UK	41.9357		25.4645	overweight
Enteritis	CJR0607	M		Asia	China		gastric cancer
Enteritis	DCY0308	F		Asia	China		colon cancer
Enteritis	DK0307	F		Asia	China		gastric cancer
Enteritis	DXZ0206	F		Asia	China		esophageal carcinoma
Enteritis	FGL0209	F		Asia	China		colon cancer
Enteritis	GFC0307	M		Asia	China		gastric cancer
Enteritis	HFS0223	M		Asia	China		gastric cancer
Enteritis	HLT0605	M		Asia	China		others
Enteritis	JSZ0202	F		Asia	China		gastric cancer
Enteritis	KL0213	M		Asia	China		others
Enteritis	LBZ0426	M		Asia	China		others
Enteritis	LCR0131	F		Asia	China		others
Enteritis	LDG0202	M		Asia	China		colon cancer
Enteritis	LJD0426	M		Asia	China		esophageal carcinoma
Enteritis	LJS0605	M		Asia	China		gastric cancer
Enteritis	LJZ0228	M		Asia	China		gastric cancer
Enteritis	LLY0530	F		Asia	China		gastric cancer
Enteritis	LMR0315	M		Asia	China		others
Enteritis	LQR0426	F		Asia	China		others
Enteritis	LRH0523	M		Asia	China		gastric cancer
Enteritis	LSW0213	M		Asia	China		esophageal carcinoma
Enteritis	LY0604	M		Asia	China		others
Enteritis	LYX0319	F		Asia	China		colon cancer
Enteritis	LZH0301	M		Asia	China		others
Enteritis	SCL0409	M		Asia	China		others
Enteritis	SQ0308	M		Asia	China		esophageal carcinoma
Enteritis	WKS0327	M		Asia	China		colon cancer
Enteritis	WXJ0412	F		Asia	China		gastric cancer
Enteritis	XBQ0305	M		Asia	China		esophageal carcinoma
Enteritis	YJP0213	F		Asia	China		gastric cancer
Feng	ERR688505	M	Urban	Europe	Austria	64	carcinoma	29.3524	overweight
Feng	ERR688506	M	Urban	Europe	Austria	68	controls	32	obesity
Feng	ERR688507	F	Urban	Europe	Austria	60	controls	22.1	normal
Feng	ERR688508	M	Urban	Europe	Austria	70	advanced adenoma	34.11	obesity
Feng	ERR688509	M	Urban	Europe	Austria	68	controls	23.45	normal
Feng	ERR688510	M	Urban	Europe	Austria	66	controls	30.3	obesity
Feng	ERR688511	M	Urban	Europe	Austria	73	controls	29.7	overweight
Feng	ERR688512	M	Urban	Europe	Austria	67	advanced adenoma	27.14	overweight
Feng	ERR688513	M	Urban	Europe	Austria	73	carcinoma	17.9902	underweight
Feng	ERR688514	F	Urban	Europe	Austria	67	controls	30	overweight
Feng	ERR688515	M	Urban	Europe	Austria	65	carcinoma	28.0277	overweight
Feng	ERR688516	F	Urban	Europe	Austria	74	controls	28.3	overweight
Feng	ERR688517	F	Urban	Europe	Austria	65	carcinoma	23.3067	normal
Feng	ERR688518	M	Urban	Europe	Austria	70	controls	22.64	normal
Feng	ERR688519	M	Urban	Europe	Austria	62	advanced adenoma	26.88	overweight
Feng	ERR688520	M	Urban	Europe	Austria	65	controls	29.06	overweight
Feng	ERR688521	M	Urban	Europe	Austria	67	carcinoma	29.4029	overweight
Feng	ERR688522	F	Urban	Europe	Austria	69	advanced adenoma	24.13	normal
Feng	ERR688523	M	Urban	Europe	Austria	67	controls	22.79	normal
Feng	ERR688524	M	Urban	Europe	Austria	62	advanced adenoma	30.1	obesity
Feng	ERR688525	M	Urban	Europe	Austria	82	carcinoma	30.4705	obesity
Feng	ERR688526	M	Urban	Europe	Austria	63	advanced adenoma	34.08	obesity
Feng	ERR688527	M	Urban	Europe	Austria	84	carcinoma	27.2817	overweight
Feng	ERR688528	F	Urban	Europe	Austria	68	controls	21.7	normal
Feng	ERR688529	M	Urban	Europe	Austria	63	controls	30.9	obesity
Feng	ERR688530	M	Urban	Europe	Austria	68	controls	22.2	normal
Feng	ERR688531	M	Urban	Europe	Austria	62	advanced adenoma	35.43	obesity
Feng	ERR688532	M	Urban	Europe	Austria	72	controls	29.03	overweight
Feng	ERR688533	M	Urban	Europe	Austria	71	controls	29.04	overweight
Feng	ERR688534	F	Urban	Europe	Austria	86	carcinoma	20.5049	normal
Feng	ERR688535	M	Urban	Europe	Austria	63	controls	30.4	obesity
Feng	ERR688536	F	Urban	Europe	Austria	68	advanced adenoma	34.01	obesity
Feng	ERR688537	M	Urban	Europe	Austria	72	controls	31.8	obesity
Feng	ERR688538	F	Urban	Europe	Austria	68	advanced adenoma	24.84	normal
Feng	ERR688539	F	Urban	Europe	Austria	69	controls	30	overweight
Feng	ERR688540	M	Urban	Europe	Austria	71	advanced adenoma	27.04	overweight
Feng	ERR688541	F	Urban	Europe	Austria	84	carcinoma	31.2175	obesity
Feng	ERR688542	M	Urban	Europe	Austria	63	advanced adenoma	30.77	obesity
Feng	ERR688543	M	Urban	Europe	Austria	67	controls	23.14	normal
Feng	ERR688544	F	Urban	Europe	Austria	66	controls	21.7	normal
Feng	ERR688545	F	Urban	Europe	Austria	72	advanced adenoma	27.43	overweight
Feng	ERR688546	F	Urban	Europe	Austria	78	advanced adenoma	31.24	obesity
Feng	ERR688547	M	Urban	Europe	Austria	60	carcinoma	26.6436	overweight
Feng	ERR688548	M	Urban	Europe	Austria	68	carcinoma	32.2494	obesity
Feng	ERR688549	F	Urban	Europe	Austria	69	advanced adenoma	24.4	normal
Feng	ERR688550	M	Urban	Europe	Austria	64	controls	29.3	overweight
Feng	ERR688551	M	Urban	Europe	Austria	65	controls	28.9	overweight
Feng	ERR688552	F	Urban	Europe	Austria	70	controls	31	obesity
Feng	ERR688553	F	Urban	Europe	Austria	84	carcinoma	27.7671	overweight
Feng	ERR688554	F	Urban	Europe	Austria	74	controls	28.5	overweight
Feng	ERR688555	M	Urban	Europe	Austria	77	advanced adenoma	25.7	overweight
Feng	ERR688556	F	Urban	Europe	Austria	70	controls	30	overweight
Feng	ERR688557	M	Urban	Europe	Austria	66	controls	29.98	overweight
Feng	ERR688558	M	Urban	Europe	Austria	74	carcinoma	26.3656	overweight
Feng	ERR688559	F	Urban	Europe	Austria	72	controls	28.7	overweight
Feng	ERR688560	F	Urban	Europe	Austria	84	advanced adenoma	24.7	normal
Feng	ERR688561	M	Urban	Europe	Austria	66	controls	30.02	obesity
Feng	ERR688562	F	Urban	Europe	Austria	69	controls	28.3	overweight
Feng	ERR688563	F	Urban	Europe	Austria	69	controls	22.4	normal
Feng	ERR688564	M	Urban	Europe	Austria	70	controls	31.25	obesity
Feng	ERR688565	M	Urban	Europe	Austria	66	controls	34.04	obesity
Feng	ERR688566	F	Urban	Europe	Austria	73	controls	32	obesity
Feng	ERR688567	M	Urban	Europe	Austria	54	carcinoma	27.3356	overweight
Feng	ERR688568	F	Urban	Europe	Austria	55	carcinoma	23.3355	normal
Feng	ERR688569	F	Urban	Europe	Austria	73	carcinoma	29.7521	overweight
Feng	ERR688570	F	Urban	Europe	Austria	64	carcinoma	24.0882	normal
Feng	ERR688571	M	Urban	Europe	Austria	63	carcinoma	25.8806	overweight
Feng	ERR688572	M	Urban	Europe	Austria	72	carcinoma	28.4082	overweight
Feng	ERR688573	M	Urban	Europe	Austria	46	carcinoma	30.8642	obesity
Feng	ERR688574	M	Urban	Europe	Austria	73	carcinoma	24.8163	normal
Feng	ERR688575	F	Urban	Europe	Austria	74	carcinoma	29.1749	overweight
Feng	ERR688576	M	Urban	Europe	Austria	58	carcinoma	27.7575	overweight
Feng	ERR688577	F	Urban	Europe	Austria	56	carcinoma	20.0692	normal
Feng	ERR688578	F	Urban	Europe	Austria	72	carcinoma	26.6728	overweight
Feng	ERR688579	F	Urban	Europe	Austria	52	carcinoma	27.1416	overweight
Feng	ERR688580	M	Urban	Europe	Austria	71	carcinoma	29.737	overweight
Feng	ERR688581	M	Urban	Europe	Austria	74	carcinoma	24.3375	normal
Feng	ERR688582	F	Urban	Europe	Austria	60	carcinoma	30.0781	obesity
Feng	ERR688583	M	Urban	Europe	Austria	43	carcinoma	22.68	normal
Feng	ERR688584	M	Urban	Europe	Austria	56	advanced adenoma	29.41	overweight
Feng	ERR688585	F	Urban	Europe	Austria	83	advanced adenoma	21.94	normal
Feng	ERR688586	M	Urban	Europe	Austria	67	advanced adenoma	33.23	obesity
Feng	ERR688587	F	Urban	Europe	Austria	60	advanced adenoma	30	overweight
Feng	ERR688588	M	Urban	Europe	Austria	67	advanced adenoma	28.34	overweight
Feng	ERR688589	M	Urban	Europe	Austria	69	advanced adenoma	21.46	normal
Feng	ERR688590	F	Urban	Europe	Austria	71	controls	29	overweight
Feng	ERR688591	M	Urban	Europe	Austria	64	controls	29.38	overweight
Feng	ERR688592	F	Urban	Europe	Austria	64	advanced adenoma	20.52	normal
Feng	ERR688593	M	Urban	Europe	Austria	64	controls	22.78	normal
Feng	ERR688594	F	Urban	Europe	Austria	68	controls	22.1	normal
Feng	ERR688595	M	Urban	Europe	Austria	63	controls	34.14	obesity
Feng	ERR688596	M	Urban	Europe	Austria	70	controls	31.6	obesity
Feng	ERR688597	F	Urban	Europe	Austria	61	advanced adenoma	22.8	normal
Feng	ERR688598	F	Urban	Europe	Austria	74	controls	28.5	overweight
Feng	ERR688599	M	Urban	Europe	Austria	63	controls	30.4	obesity
Feng	ERR688600	F	Urban	Europe	Austria	72	controls	30	overweight
Feng	ERR688601	F	Urban	Europe	Austria	62	advanced adenoma	32.8	obesity
Feng	ERR688602	M	Urban	Europe	Austria	63	advanced adenoma	27.4	overweight
Feng	ERR688603	F	Urban	Europe	Austria	71	controls	29	overweight
Feng	ERR688604	F	Urban	Europe	Austria	52	advanced adenoma	32.8	obesity
Feng	ERR688605	M	Urban	Europe	Austria	65	controls	31.22	obesity
Feng	ERR688606	F	Urban	Europe	Austria	68	controls	22.4	normal
Feng	ERR688607	M	Urban	Europe	Austria	72	controls	31.8	obesity
Feng	ERR688608	M	Urban	Europe	Austria	65	controls	22.03	normal
Feng	ERR688609	M	Urban	Europe	Austria	64	advanced adenoma	29.3	overweight
Feng	ERR688610	F	Urban	Europe	Austria	70	controls	22.67	normal
Feng	ERR688611	F	Urban	Europe	Austria	78	advanced adenoma	24	normal
Feng	ERR688612	F	Urban	Europe	Austria	75	controls	31	obesity
Feng	ERR688613	M	Urban	Europe	Austria	71	advanced adenoma	24.8	normal
Feng	ERR688614	M	Urban	Europe	Austria	70	controls	23.67	normal
Feng	ERR688615	M	Urban	Europe	Austria	58	advanced adenoma	21.7	normal
Feng	ERR688616	M	Urban	Europe	Austria	63	controls	31.17	obesity
Feng	ERR688617	F	Urban	Europe	Austria	70	controls	22.8	normal
Feng	ERR688618	F	Urban	Europe	Austria	47	carcinoma	25.7812	overweight
Feng	ERR688619	F	Urban	Europe	Austria	67	controls	22.58	normal
Feng	ERR688620	M	Urban	Europe	Austria	80	advanced adenoma	26.47	overweight
Feng	ERR688621	F	Urban	Europe	Austria	75	advanced adenoma	30.12	obesity
Feng	ERR688622	F	Urban	Europe	Austria	62	controls	22.1	normal
Feng	ERR688623	M	Urban	Europe	Austria	48	advanced adenoma	25.61	overweight
Feng	ERR688624	M	Urban	Europe	Austria	68	controls	29.8	overweight
Feng	ERR688625	F	Urban	Europe	Austria	56	advanced adenoma	22.8	normal
Feng	ERR688626	F	Urban	Europe	Austria	70	advanced adenoma	25.2	overweight
Feng	ERR688627	M	Urban	Europe	Austria	62	advanced adenoma	24.3	normal
Feng	ERR688628	F	Urban	Europe	Austria	63	advanced adenoma	30.47	obesity
Feng	ERR688629	M	Urban	Europe	Austria	77	advanced adenoma	37.56	obesity
Feng	ERR688630	F	Urban	Europe	Austria	66	advanced adenoma	22.65	normal
Feng	ERR688631	F	Urban	Europe	Austria	70	advanced adenoma	29.38	overweight
Feng	ERR688632	F	Urban	Europe	Austria	74	advanced adenoma	24.13	normal
Feng	ERR688633	M	Urban	Europe	Austria	58	advanced adenoma	27.02	overweight
Feng	ERR688634	M	Urban	Europe	Austria	77	carcinoma	29.4118	overweight
Feng	ERR688635	M	Urban	Europe	Austria	52	carcinoma	25.7276	overweight
Feng	ERR688636	F	Urban	Europe	Austria	72	carcinoma	24.2188	normal
Feng	ERR688637	M	Urban	Europe	Austria	79	carcinoma	26.2976	overweight
Feng	ERR688638	M	Urban	Europe	Austria	77	carcinoma	19.1571	normal
Feng	ERR688639	M	Urban	Europe	Austria	64	carcinoma	29.0688	overweight
Feng	ERR688640	F	Urban	Europe	Austria	72	carcinoma	27.1203	overweight
Feng	ERR688641	M	Urban	Europe	Austria	69	carcinoma	29.9383	overweight
Feng	ERR688642	M	Urban	Europe	Austria	66	carcinoma	22.5981	normal
Feng	ERR688643	F	Urban	Europe	Austria	72	carcinoma	23.8281	normal
Feng	ERR688644	M	Urban	Europe	Austria	65	carcinoma	29.7406	overweight
Feng	ERR688645	F	Urban	Europe	Austria	59	advanced adenoma	29.2	overweight
Feng	ERR688646	M	Urban	Europe	Austria	46	controls	23.15	normal
Feng	ERR688647	M	Urban	Europe	Austria	63	carcinoma	33.564	obesity
Feng	ERR688648	M	Urban	Europe	Austria	46	controls	28.74	overweight
Feng	ERR688649	F	Urban	Europe	Austria	45	carcinoma	22.1453	normal
Feng	ERR688650	M	Urban	Europe	Austria	72	carcinoma	24.3375	normal
Feng	ERR688651	F	Urban	Europe	Austria	77	carcinoma	23.4952	normal
Feng	ERR710424	M	Urban	Europe	Austria	63	advanced adenoma	25.6489	overweight
Feng	ERR710425	F	Urban	Europe	Austria	56	advanced adenoma	43.5799	obesity
Feng	ERR710426	M	Urban	Europe	Austria	55	controls	27.7634	overweight
Feng	ERR710427	M	Urban	Europe	Austria	70	controls	28.7197	overweight
Feng	ERR710428	F	Urban	Europe	Austria	73	controls	26.5625	overweight
Feng	ERR710429	M	Urban	Europe	Austria	68	controls	23.5294	normal
Feng	ERR710430	M	Urban	Europe	Austria	78	controls	31.2213	obesity
Feng	ERR710431	F	Urban	Europe	Austria	68	advanced adenoma	27.5482	overweight
Feng	ERR710432	F	Urban	Europe	Austria	43	controls	22.6474	normal
Li	MH0192_101007			Europe	Danish
Li	MH0221_101031			Europe	Danish
Li	MH0222_101031			Europe	Danish
Li	MH0234_101031			Europe	Danish
Li	MH0238_101031			Europe	Danish
Li	MH0245_101031			Europe	Danish
Li	MH0246_101007			Europe	Danish
Li	MH0252_101031			Europe	Danish
Li	MH0259_101007			Europe	Danish
Li	MH0260_101031			Europe	Danish
Li	MH0261_101007			Europe	Danish
Li	MH0262_101031			Europe	Danish
Li	MH0264_101031			Europe	Danish
Li	MH0265_101031			Europe	Danish
Li	MH0266_101031			Europe	Danish
Li	MH0268_101031			Europe	Danish
Li	MH0270_101031			Europe	Danish
Li	MH0271_101205			Europe	Danish
Li	MH0280_101031			Europe	Danish
Li	MH0281_101031			Europe	Danish
Li	MH0283_101207			Europe	Danish
Li	MH0284_101031			Europe	Danish
Li	MH0290_101102			Europe	Danish
Li	MH0293_101007			Europe	Danish
Li	MH0297_101102			Europe	Danish
Li	MH0298_101102			Europe	Danish
Li	MH0299_101007			Europe	Danish
Li	MH0301_101102			Europe	Danish
Li	MH0303_101007			Europe	Danish
Li	MH0308_101031			Europe	Danish
Li	MH0309_101007			Europe	Danish
Li	MH0310_101031			Europe	Danish
Li	MH0311_101007			Europe	Danish
Li	MH0314_101102			Europe	Danish
Li	MH0315_101102			Europe	Danish
Li	MH0319_101031			Europe	Danish
Li	MH0323_101031			Europe	Danish
Li	MH0325_101007			Europe	Danish
Li	MH0326_101031			Europe	Danish
Li	MH0327_101007			Europe	Danish
Li	MH0328_101007			Europe	Danish
Li	MH0329_101031			Europe	Danish
Li	MH0330_101031			Europe	Danish
Li	MH0332_101031			Europe	Danish
Li	MH0334_101101			Europe	Danish
Li	MH0335_101101			Europe	Danish
Li	MH0336_101008			Europe	Danish
Li	MH0337_101008			Europe	Danish
Li	MH0338_101009			Europe	Danish
Li	MH0339_101009			Europe	Danish
Li	MH0340_101102			Europe	Danish
Li	MH0341_101009			Europe	Danish
Li	MH0342_101009			Europe	Danish
Li	MH0343_101009			Europe	Danish
Li	MH0345_101009			Europe	Danish
Li	MH0346_101009			Europe	Danish
Li	MH0347_101101			Europe	Danish
Li	MH0348_101101			Europe	Danish
Li	MH0349_101009			Europe	Danish
Li	MH0350_101009			Europe	Danish
Li	MH0351_101102			Europe	Danish
Li	MH0354_101101			Europe	Danish
Li	MH0355_101009			Europe	Danish
Li	MH0356_101101			Europe	Danish
Li	MH0357_101009			Europe	Danish
Li	MH0358_101009			Europe	Danish
Li	MH0359_101009			Europe	Danish
Li	MH0360_101009			Europe	Danish
Li	MH0361_101009			Europe	Danish
Li	MH0362_101009			Europe	Danish
Li	MH0363_101009			Europe	Danish
Li	MH0364_101111			Europe	Danish
Li	MH0365_101102			Europe	Danish
Li	MH0366_101111			Europe	Danish
Li	MH0367_101009			Europe	Danish
Li	MH0368_101009			Europe	Danish
Li	MH0369_101111			Europe	Danish
Li	MH0370_101009			Europe	Danish
Li	MH0371_101009			Europe	Danish
Li	MH0372_101009			Europe	Danish
Li	MH0373_101009			Europe	Danish
Li	MH0374_101009			Europe	Danish
Li	MH0375_101102			Europe	Danish
Li	MH0376_101009			Europe	Danish
Li	MH0377_101009			Europe	Danish
Li	MH0378_101009			Europe	Danish
Li	MH0379_101009			Europe	Danish
Li	MH0381_101102			Europe	Danish
Li	MH0382_101111			Europe	Danish
Li	MH0383_101009			Europe	Danish
Li	MH0384_101009			Europe	Danish
Li	MH0385_101009			Europe	Danish
Li	MH0386_101009			Europe	Danish
Li	MH0387_101009			Europe	Danish
Li	MH0388_101111			Europe	Danish
Li	MH0389_101101			Europe	Danish
Li	MH0390_101009			Europe	Danish
Li	MH0391_101009			Europe	Danish
Li	MH0392_101009			Europe	Danish
Li	MH0393_101101			Europe	Danish
Li	MH0394_101009			Europe	Danish
Li	MH0395_101009			Europe	Danish
Li	MH0396_101031			Europe	Danish
Li	MH0397_101101			Europe	Danish
Li	MH0398_101101			Europe	Danish
Li	MH0399_101031			Europe	Danish
Li	MH0400_101101			Europe	Danish
Li	MH0401_101102			Europe	Danish
Li	MH0402_101111			Europe	Danish
Li	O2.CD1-0_110821			Europe	Spanish
Li	O2.CD1-0-PT_110821			Europe	Spanish
Li	O2.CD2-0_110820			Europe	Spanish
Li	O2.CD2-0-PT_110821			Europe	Spanish
Li	O2.CD3-0-PT_110820			Europe	Spanish
Li	O2.UC11-1_111207			Europe	Spanish
Li	O2.UC1-1_111207			Europe	Spanish
Li	O2.UC12-1_111207			Europe	Spanish
Li	O2.UC13-1_111207			Europe	Spanish
Li	O2.UC14-1_111207			Europe	Spanish
Li	O2.UC15-0_100908			Europe	Spanish
Li	O2.UC15-1_111207			Europe	Spanish
Li	O2.UC15-2_100908			Europe	Spanish
Li	O2.UC16-1_111213			Europe	Spanish
Li	O2.UC17-1_111207			Europe	Spanish
Li	O2.UC18-1_111207			Europe	Spanish
Li	O2.UC19-1_111207			Europe	Spanish
Li	O2.UC20-1_111207			Europe	Spanish
Li	O2.UC21-1_111207			Europe	Spanish
Li	O2.UC2-1_111207			Europe	Spanish
Li	O2.UC22-1_111206			Europe	Spanish
Li	O2.UC23-1_111206			Europe	Spanish
Li	O2.UC24-1_111206			Europe	Spanish
Li	O2.UC26-1_111206			Europe	Spanish
Li	O2.UC27-1_111207			Europe	Spanish
Li	O2.UC28-0_100908			Europe	Spanish
Li	O2.UC28-1_111207			Europe	Spanish
Li	O2.UC28-2_100908			Europe	Spanish
Li	O2.UC29-1_111207			Europe	Spanish
Li	O2.UC30-1_111207			Europe	Spanish
Li	O2.UC31-1_111207			Europe	Spanish
Li	O2.UC3-1_111207			Europe	Spanish
Li	O2.UC32-1_111207			Europe	Spanish
Li	O2.UC35-1_111207			Europe	Spanish
Li	O2.UC36-0_100902			Europe	Spanish
Li	O2.UC36-1_111207			Europe	Spanish
Li	O2.UC37-1_111207			Europe	Spanish
Li	O2.UC38-1_111207			Europe	Spanish
Li	O2.UC40-1_111207			Europe	Spanish
Li	O2.UC41-1_111207			Europe	Spanish
Li	O2.UC4-1_111207			Europe	Spanish
Li	O2.UC43-1_111206			Europe	Spanish
Li	O2.UC44-1_111206			Europe	Spanish
Li	O2.UC46-1_111206			Europe	Spanish
Li	O2.UC47-1_111206			Europe	Spanish
Li	O2.UC48-1_111213			Europe	Spanish
Li	O2.UC5-1_111207			Europe	Spanish
Li	O2.UC6-0_100908			Europe	Spanish
Li	O2.UC6-1_111207			Europe	Spanish
Li	O2.UC6-2_100908			Europe	Spanish
Li	O2.UC7-0_111207			Europe	Spanish
Li	O2.UC7-1_111207			Europe	Spanish
Li	O2.UC8-0_100908			Europe	Spanish
Li	O2.UC8-1_111207			Europe	Spanish
Li	O2.UC8-2_100908			Europe	Spanish
Li	O2.UC9-1_111207			Europe	Spanish
Li	V1.CD1-0-PN_101220			Europe	Spanish
Li	V1.CD1-0-PT_110820			Europe	Spanish
Li	V1.CD12-3_100902			Europe	Spanish
Li	V1.CD1-3-PN_101220			Europe	Spanish
Li	V1.CD20-0_100902			Europe	Spanish
Li	V1.CD2-0-PN_101220			Europe	Spanish
Li	V1.CD2-0-PT_110820			Europe	Spanish
Li	V1.CD3-0-PN_101220			Europe	Spanish
Li	V1.CD3-0-PT_110820			Europe	Spanish
Li	V1.CD32-0_100902			Europe	Spanish
Li	V1.CD32-4_100902			Europe	Spanish
Li	V1.CD3-3-PN_101220			Europe	Spanish
Li	V1.CD37-4_101218			Europe	Spanish
Li	V1.CD40-0_100902			Europe	Spanish
Li	V1.CD4-0-PN_101220			Europe	Spanish
Li	V1.CD4-0-PT_110820			Europe	Spanish
Li	V1.CD43-0_101218			Europe	Spanish
Li	V1.CD44-0_100902			Europe	Spanish
Li	V1.CD44-4_110821			Europe	Spanish
Li	V1.CD45-0_100902			Europe	Spanish
Li	V1.CD46-0_100902			Europe	Spanish
Li	V1.CD48-0_100902			Europe	Spanish
Li	V1.CD49-0_101218			Europe	Spanish
Li	V1.CD50-0_101218			Europe	Spanish
Li	V1.CD5-0-PN_101220			Europe	Spanish
Li	V1.CD51-0_110821			Europe	Spanish
Li	V1.CD52-0_110821			Europe	Spanish
Li	V1.CD53-0_110821			Europe	Spanish
Li	V1.CD54-0_110820			Europe	Spanish
Li	V1.CD55-0_110820			Europe	Spanish
Li	V1.CD6-0-PN_101220			Europe	Spanish
Li	V1.CD6-0-PT_110820			Europe	Spanish
Li	V1.CD7-0-PN_101220			Europe	Spanish
Li	V1.CD8-0-PN_101220			Europe	Spanish
Li	V1.FI01_110821			Europe	Spanish
Li	V1.FI02_110820			Europe	Spanish
Li	V1.FI03_110820			Europe	Spanish
Li	V1.FI04_110822			Europe	Spanish
Li	V1.FI05_110822			Europe	Spanish
Li	V1.FI06_110822			Europe	Spanish
Li	V1.FI07_110821			Europe	Spanish
Li	V1.FI08_110821			Europe	Spanish
Li	V1.FI09_110821			Europe	Spanish
Li	V1.FI10_110821			Europe	Spanish
Li	V1.FI11_110821			Europe	Spanish
Li	V1.FI12_110821			Europe	Spanish
Li	V1.FI13_110821			Europe	Spanish
Li	V1.FI14_110821			Europe	Spanish
Li	V1.FI15_110821			Europe	Spanish
Li	V1.FI16_110821			Europe	Spanish
Li	V1.FI17_110822			Europe	Spanish
Li	V1.FI18_110822			Europe	Spanish
Li	V1.FI19_110822			Europe	Spanish
Li	V1.FI20_110822			Europe	Spanish
Li	V1.FI21_110822			Europe	Spanish
Li	V1.FI22_110822			Europe	Spanish
Li	V1.FI23_110822			Europe	Spanish
Li	V1.FI24_110822			Europe	Spanish
Li	V1.FI25_110822			Europe	Spanish
Li	V1.FI26_110822			Europe	Spanish
Li	V1.FI27_110822			Europe	Spanish
Li	V1.FI28_110822			Europe	Spanish
Li	V1.FI29_110822			Europe	Spanish
Li	V1.FI30_110822			Europe	Spanish
Li	V1.FI31_110822			Europe	Spanish
Li	V1.FI32_110822			Europe	Spanish
Li	V1.FI33_110822			Europe	Spanish
Li	V1.FI34_110822			Europe	Spanish
Li	V1.FI35_110822			Europe	Spanish
Li	V1.FI36_110822			Europe	Spanish
Li	V1.FI37_110822			Europe	Spanish
Li	V1.UC22-1_100902			Europe	Spanish
Li	V1.UC38-4_100902			Europe	Spanish
Li	V1.UC39-4_101220			Europe	Spanish
Li	V1.UC40-1_100816			Europe	Spanish
Li	V1.UC47-4_101220			Europe	Spanish
Li	V1.UC54-4_101220			Europe	Spanish
Li	V1.UC56-1_100816			Europe	Spanish
Li	V1.UC58-4_110821			Europe	Spanish
Li	V1.UC59-0_100816			Europe	Spanish
Li	V1.UC59-4_110821			Europe	Spanish
Li	V1.UC60-0_100811			Europe	Spanish
Li	V1.UC63-0_101005			Europe	Spanish
Li	V1.UC64-0_101220			Europe	Spanish
Qin	SRR341581	F		Asia	China	59	Type 2 diabetes stage1	19.83	normal
Qin	SRR341582	F		Asia	China	43	Type 2 diabetes stage1	17.58	underweight
Qin	SRR341583	F		Asia	China	46	Type 2 diabetes stage1	20.31	normal
Qin	SRR341584	F		Asia	China	25	Type 2 diabetes stage1	19.78	normal
Qin	SRR341585	F		Asia	China	60	Type 2 diabetes stage1	18.43	underweight
Qin	SRR341586	F		Asia	China	71	Type 2 diabetes stage1	16	underweight
Qin	SRR341587	F		Asia	China	62	Type 2 diabetes stage1	19.69	normal
Qin	SRR341588	F		Asia	China	54	Type 2 diabetes stage1	19.4	normal
Qin	SRR341589	F		Asia	China	51	Type 2 diabetes stage1	19.29	normal
Qin	SRR341590	M		Asia	China	29	Type 2 diabetes stage1	17.73	underweight
Qin	SRR341591	M		Asia	China	41	Type 2 diabetes stage1	20.8	normal
Qin	SRR341592	M		Asia	China	38	Type 2 diabetes stage1	20.2	normal
Qin	SRR341593	M		Asia	China	35	Type 2 diabetes stage1	19.72	normal
Qin	SRR341594	M		Asia	China	28	Type 2 diabetes stage1	18.59	normal
Qin	SRR341595	M		Asia	China	43	Type 2 diabetes stage1	20.05	normal
Qin	SRR341596	M		Asia	China	38	Type 2 diabetes stage1	19.59	normal
Qin	SRR341597	M		Asia	China	30	Type 2 diabetes stage1	20.05	normal
Qin	SRR341598	M		Asia	China	49	Type 2 diabetes stage1	20.05	normal
Qin	SRR341599	F		Asia	China	56	Type 2 diabetes stage1	25.3	overweight
Qin	SRR341600	F		Asia	China	70	Type 2 diabetes stage1	25.78	overweight
Qin	SRR341601	F		Asia	China	68	Type 2 diabetes stage1	27.64	overweight
Qin	SRR341602	F		Asia	China	62	Type 2 diabetes stage1	27.78	overweight
Qin	SRR341603	F		Asia	China	48	Type 2 diabetes stage1	27.06	overweight
Qin	SRR341604	F		Asia	China	61	Type 2 diabetes stage1	27.15	overweight
Qin	SRR341605	F		Asia	China	53	Type 2 diabetes stage1	25.97	overweight
Qin	SRR341606	F		Asia	China	63	Type 2 diabetes stage1	29.79	overweight
Qin	SRR341607	M		Asia	China	49	Type 2 diabetes stage1	25.31	overweight
Qin	SRR341608	M		Asia	China	57	Type 2 diabetes stage1	25.69	overweight
Qin	SRR341609	M		Asia	China	71	Type 2 diabetes stage1	25.39	overweight
Qin	SRR341610	M		Asia	China	41	Type 2 diabetes stage1	27.72	overweight
Qin	SRR341611	M		Asia	China	43	Type 2 diabetes stage1	25.65	overweight
Qin	SRR341612	M		Asia	China	72	Type 2 diabetes stage1	25.71	overweight
Qin	SRR341613	M		Asia	China	39	Type 2 diabetes stage1	25.51	overweight
Qin	SRR341614	M		Asia	China	42	Type 2 diabetes stage1	25.39	overweight
Qin	SRR341615	M		Asia	China	62	Type 2 diabetes stage1	25.39	overweight
Qin	SRR341616	F		Asia	China	31	Type 2 diabetes stage1	17.94	underweight
Qin	SRR341617	F		Asia	China	34	Type 2 diabetes stage1	17.97	underweight
Qin	SRR341618	F		Asia	China	44	Type 2 diabetes stage1	19.33	normal
Qin	SRR341619	F		Asia	China	27	Type 2 diabetes stage1	17.8	underweight
Qin	SRR341620	F		Asia	China	39	Type 2 diabetes stage1	20.57	normal
Qin	SRR341621	F		Asia	China	27	Type 2 diabetes stage1	18.99	normal
Qin	SRR341622	F		Asia	China	35	Type 2 diabetes stage1	20.17	normal
Qin	SRR341623	F		Asia	China	25	Type 2 diabetes stage1	18.52	normal
Qin	SRR341624	F		Asia	China	37	Type 2 diabetes stage1	18.67	normal
Qin	SRR341625	M		Asia	China	32	Type 2 diabetes stage1	19.14	normal
Qin	SRR341626	M		Asia	China	23	Type 2 diabetes stage1	19.49	normal
Qin	SRR341627	M		Asia	China	42	Type 2 diabetes stage1	19.13	normal
Qin	SRR341628	M		Asia	China	22	Type 2 diabetes stage1	19.57	normal
Qin	SRR341629	M		Asia	China	24	Type 2 diabetes stage1	18.37	underweight
Qin	SRR341630	M		Asia	China	23	Type 2 diabetes stage1	18.07	underweight
Qin	SRR341631	M		Asia	China	23	Type 2 diabetes stage1	19.47	normal
Qin	SRR341632	M		Asia	China	23	Type 2 diabetes stage1	19.16	normal
Qin	SRR341633	M		Asia	China	38	Type 2 diabetes stage1	19.38	normal
Qin	SRR341634	M		Asia	China	19	Type 2 diabetes stage1	17.29	underweight
Qin	SRR341635	F		Asia	China	45	Type 2 diabetes stage1	25.51	overweight
Qin	SRR341636	F		Asia	China	51	Type 2 diabetes stage1	26.56	overweight
Qin	SRR341637	F		Asia	China	33	Type 2 diabetes stage1	25.07	overweight
Qin	SRR341638	F		Asia	China	35	Type 2 diabetes stage1	26.13	overweight
Qin	SRR341639	F		Asia	China	32	Type 2 diabetes stage1	24.89	normal
Qin	SRR341640	F		Asia	China	26	Type 2 diabetes stage1	25.24	overweight
Qin	SRR341641	F		Asia	China	30	Type 2 diabetes stage1	25.39	overweight
Qin	SRR341642	F		Asia	China	41	Type 2 diabetes stage1	25.48	overweight
Qin	SRR341643	F		Asia	China	42	Type 2 diabetes stage1	25.59	overweight
Qin	SRR341644	M		Asia	China	32	Type 2 diabetes stage1	29.06	overweight
Qin	SRR341645	M		Asia	China	72	Type 2 diabetes stage1	23.66	normal
Qin	SRR341646	M		Asia	China	54	Type 2 diabetes stage1	26.57	overweight
Qin	SRR341647	M		Asia	China	32	Type 2 diabetes stage1	25.71	overweight
Qin	SRR341648	M		Asia	China	42	Type 2 diabetes stage1	26.22	overweight
Qin	SRR341649	M		Asia	China	43	Type 2 diabetes stage1	25	overweight
Qin	SRR341650	M		Asia	China	23	Type 2 diabetes stage1	26.73	overweight
Qin	SRR341651	M		Asia	China	46	Type 2 diabetes stage1	27.12	overweight
Qin	SRR341652	M		Asia	China	52	Type 2 diabetes stage1	25.71	overweight
Qin	SRR341653	M		Asia	China	14	Type 2 diabetes stage1	32.58	obesity
Qin	SRR341654	F		Asia	China	53	Type 2 diabetes stage1	18.49	underweight
Qin	SRR341655	F		Asia	China	52	Type 2 diabetes stage1	19.47	normal
Qin	SRR341656	F		Asia	China	49	Type 2 diabetes stage1	19.63	normal
Qin	SRR341657	F		Asia	China	61	Type 2 diabetes stage1	19.98	normal
Qin	SRR341658	M		Asia	China	46	Type 2 diabetes stage1	20.24	normal
Qin	SRR341659	M		Asia	China	37	Type 2 diabetes stage1	19.03	normal
Qin	SRR341660	M		Asia	China	55	Type 2 diabetes stage1	20.57	normal
Qin	SRR341661	M		Asia	China	51	Type 2 diabetes stage1	18.37	underweight
Qin	SRR341662	M		Asia	China	48	Type 2 diabetes stage1	20.31	normal
Qin	SRR341663	M		Asia	China	56	Type 2 diabetes stage1	21.11	normal
Qin	SRR341664	M		Asia	China	70	Type 2 diabetes stage1	20.9	normal
Qin	SRR341665	M		Asia	China	52	Type 2 diabetes stage1	18.83	normal
Qin	SRR341666	M		Asia	China	49	Type 2 diabetes stage1	20.07	normal
Qin	SRR341667	M		Asia	China	47	Type 2 diabetes stage1	20.08	normal
Qin	SRR341668	M		Asia	China	41	Type 2 diabetes stage1	20.62	normal
Qin	SRR341669	M		Asia	China	58	Type 2 diabetes stage1	18.21	underweight
Qin	SRR341670	M		Asia	China	53	Type 2 diabetes stage1	19.84	normal
Qin	SRR341671	M		Asia	China	45	Type 2 diabetes stage1	20.81	normal
Qin	SRR341672	M		Asia	China	39	Type 2 diabetes stage1	20.57	normal
Qin	SRR341673	M		Asia	China	70	Type 2 diabetes stage1	21.6	normal
Qin	SRR341674	M		Asia	China	63	Type 2 diabetes stage1	20.42	normal
Qin	SRR341675	F		Asia	China	59	Type 2 diabetes stage1	26.71	overweight
Qin	SRR341676	F		Asia	China	63	Type 2 diabetes stage1	25.39	overweight
Qin	SRR341677	F		Asia	China	51	Type 2 diabetes stage1	26.04	overweight
Qin	SRR341678	F		Asia	China	40	Type 2 diabetes stage1	25.84	overweight
Qin	SRR341679	M		Asia	China	59	Type 2 diabetes stage1	25.26	overweight
Qin	SRR341680	M		Asia	China	53	Type 2 diabetes stage1	25.16	overweight
Qin	SRR341681	M		Asia	China	75	Type 2 diabetes stage1	25.39	overweight
Qin	SRR341682	M		Asia	China	74	Type 2 diabetes stage1	25.75	overweight
Qin	SRR341683	M		Asia	China	36	Type 2 diabetes stage1	26.82	overweight
Qin	SRR341684	M		Asia	China	68	Type 2 diabetes stage1	25.35	overweight
Qin	SRR341685	M		Asia	China	39	Type 2 diabetes stage1	27.58	overweight
Qin	SRR341686	M		Asia	China	68	Type 2 diabetes stage1	25.5	overweight
Qin	SRR341687	M		Asia	China	53	Type 2 diabetes stage1	25.31	overweight
Qin	SRR341688	M		Asia	China	31	Type 2 diabetes stage1	27.43	overweight
Qin	SRR341689	M		Asia	China	36	Type 2 diabetes stage1	27.28	overweight
Qin	SRR341690	F		Asia	China	26	Type 2 diabetes stage1	18.03	underweight
Qin	SRR341691	F		Asia	China	27	Type 2 diabetes stage1	19.53	normal
Qin	SRR341692	F		Asia	China	32	Type 2 diabetes stage1	18.2	underweight
Qin	SRR341693	F		Asia	China	59	Type 2 diabetes stage1	19.15	normal
Qin	SRR341694	M		Asia	China	23	Type 2 diabetes stage1	18.72	normal
Qin	SRR341695	M		Asia	China	24	Type 2 diabetes stage1	19.35	normal
Qin	SRR341696	M		Asia	China	24	Type 2 diabetes stage1	19.03	normal
Qin	SRR341697	M		Asia	China	22	Type 2 diabetes stage1	19.92	normal
Qin	SRR341698	M		Asia	China	23	Type 2 diabetes stage1	19.96	normal
Qin	SRR341699	M		Asia	China	25	Type 2 diabetes stage1	18.59	normal
Qin	SRR341700	M		Asia	China	29	Type 2 diabetes stage1	19.84	normal
Qin	SRR341701	M		Asia	China	23	Type 2 diabetes stage1	19.38	normal
Qin	SRR341702	M		Asia	China	24	Type 2 diabetes stage1	20.66	normal
Qin	SRR341703	M		Asia	China	22	Type 2 diabetes stage1	19.36	normal
Qin	SRR341704	M		Asia	China	21	Type 2 diabetes stage1	19.05	normal
Qin	SRR341705	M		Asia	China	25	Type 2 diabetes stage1	19.44	normal
Qin	SRR341706	M		Asia	China	33	Type 2 diabetes stage1	20.31	normal
Qin	SRR341707	M		Asia	China	39	Type 2 diabetes stage1	19.49	normal
Qin	SRR341708	F		Asia	China	32	Type 2 diabetes stage1	25.39	overweight
Qin	SRR341709	F		Asia	China	30	Type 2 diabetes stage1	26.71	overweight
Qin	SRR341710	F		Asia	China	40	Type 2 diabetes stage1	24.89	normal
Qin	SRR341711	F		Asia	China	38	Type 2 diabetes stage1	25.81	overweight
Qin	SRR341712	M		Asia	China	48	Type 2 diabetes stage1	26.45	overweight
Qin	SRR341713	M		Asia	China	68	Type 2 diabetes stage1	28.3	overweight
Qin	SRR341714	M		Asia	China	46	Type 2 diabetes stage1	25.4	overweight
Qin	SRR341715	M		Asia	China	33	Type 2 diabetes stage1	25.18	overweight
Qin	SRR341716	M		Asia	China	30	Type 2 diabetes stage1	25.71	overweight
Qin	SRR341717	M		Asia	China	41	Type 2 diabetes stage1	25.1	overweight
Qin	SRR341718	M		Asia	China	32	Type 2 diabetes stage1	25.73	overweight
Qin	SRR341719	M		Asia	China	37	Type 2 diabetes stage1	24.77	normal
Qin	SRR341720	M		Asia	China	39	Type 2 diabetes stage1	27.24	overweight
Qin	SRR341721	M		Asia	China	26	Type 2 diabetes stage1	25.47	overweight
Qin	SRR341722	M		Asia	China	24	Type 2 diabetes stage1	25.21	overweight
Qin	SRR341723	M		Asia	China	28	Type 2 diabetes stage1	25.59	overweight
Qin	SRR341724	M		Asia	China	38	Type 2 diabetes stage1	25.71	overweight
Qin	SRR341725	M		Asia	China	47	Type 2 diabetes stage1	26.57	overweight
Rampelli_2015	SRR1927149	F	Rural	Africa	Tanzania	43	healthy
Rampelli_2015	SRR1929408	F		Africa	Tanzania	40	healthy
Rampelli_2015	SRR1929484	F	Rural	Africa	Tanzania	29	healthy
Rampelli_2015	SRR1929485	F	Rural	Africa	Tanzania	8	healthy
Rampelli_2015	SRR1929563	M	Rural	Africa	Tanzania	34	healthy
Rampelli_2015	SRR1929574	M	Rural	Africa	Tanzania	16	healthy
Rampelli_2015	SRR1930121	M		Africa	Tanzania	30	healthy
Rampelli_2015	SRR1930122	M	Rural	Africa	Tanzania	21	healthy
Rampelli_2015	SRR1930123	M		Africa	Tanzania	23	healthy
Rampelli_2015	SRR1930128	M	Rural	Africa	Tanzania	17	healthy
Rampelli_2015	SRR1930132	M	Rural	Africa	Tanzania	15	healthy
Rampelli_2015	SRR1930133	M	Rural	Africa	Tanzania	37	healthy
Rampelli_2015	SRR1930134	M	Rural	Africa	Tanzania	13	healthy
Rampelli_2015	SRR1930136	M		Africa	Tanzania	43	healthy
Rampelli_2015	SRR1930138	M	Rural	Africa	Tanzania	38	healthy
Rampelli_2015	SRR1930140	M	Rural	Africa	Tanzania	24	healthy
Rampelli_2015	SRR1930141	M		Africa	Tanzania	65	healthy
Rampelli_2015	SRR1930142	M	Rural	Africa	Tanzania	40	healthy
Rampelli_2015	SRR1930143	M	Rural	Africa	Tanzania	48	healthy
Rampelli_2015	SRR1930144	F	Rural	Africa	Tanzania	29	healthy
Rampelli_2015	SRR1930145	M		Africa	Tanzania	22	healthy
Rampelli_2015	SRR1930149	M	Rural	Africa	Tanzania	24	healthy
Rampelli_2015	SRR1930176	F	Rural	Africa	Tanzania	70	healthy
Rampelli_2015	SRR1930177	M	Rural	Africa	Tanzania	30	healthy
Rampelli_2015	SRR1930179	F	Rural	Africa	Tanzania	38	healthy
Rampelli_2015	SRR1930187	F	Rural	Africa	Tanzania	20	healthy
Rampelli_2015	SRR1930244	F	Rural	Africa	Tanzania	47	healthy
Rampelli_2015	SRR1930247	M	Urban	Europe	Italy	38	healthy
Rampelli_2015	SRR1930248	F	Urban	Europe	Italy	40	healthy
Rampelli_2015	SRR1930250	F	Urban	Europe	Italy	21	healthy
Rampelli_2015	SRR1930251	F	Urban	Europe	Italy	30	healthy
Rampelli_2015	SRR1930253	F	Urban	Europe	Italy	34	healthy
Rampelli_2015	SRR1930255	F	Urban	Europe	Italy	29	healthy
Rampelli_2015	SRR1930777	M	Urban	Europe	Italy	27	healthy
Rampelli_2015	SRR1931170	M	Urban	Europe	Italy	30	healthy
Rampelli_2015	SRR1931173	F	Urban	Europe	Italy	32	healthy
Rampelli_2015	SRR1931177	F	Urban	Europe	Italy	25	healthy
Rampelli_2015	SRR1931178	M	Urban	Europe	Italy	34	healthy
Rampelli_2020	SRR9654970	F	Urban	Europe	Italy	106
Rampelli_2020	SRR9654971	F	Urban	Europe	Italy	105
Rampelli_2020	SRR9654972	M	Urban	Europe	Italy	106
Rampelli_2020	SRR9654973	F	Urban	Europe	Italy	108
Rampelli_2020	SRR9654974	F	Urban	Europe	Italy	105
Rampelli_2020	SRR9654975	F	Urban	Europe	Italy	105
Rampelli_2020	SRR9654976	F	Urban	Europe	Italy	105
Rampelli_2020	SRR9654977	F	Urban	Europe	Italy	104
Rampelli_2020	SRR9654978	M	Urban	Europe	Italy	105
Rampelli_2020	SRR9654979	F	Urban	Europe	Italy	105
Rampelli_2020	SRR9654980	F	Urban	Europe	Italy	107
Rampelli_2020	SRR9654981	F	Urban	Europe	Italy	105
Rampelli_2020	SRR9654982	F	Urban	Europe	Italy	70
Rampelli_2020	SRR9654983	F	Urban	Europe	Italy	63
Rampelli_2020	SRR9654984	F	Urban	Europe	Italy	71
Rampelli_2020	SRR9654985	F	Urban	Europe	Italy	75
Rampelli_2020	SRR9654986	F	Urban	Europe	Italy	70
Rampelli_2020	SRR9654987	F	Urban	Europe	Italy	71
Rampelli_2020	SRR9654988	M	Urban	Europe	Italy	76
Rampelli_2020	SRR9654989	F	Urban	Europe	Italy	76
Rampelli_2020	SRR9654990	F	Urban	Europe	Italy	107
Rampelli_2020	SRR9654991	F	Urban	Europe	Italy	109
Rampelli_2020	SRR9654992	F	Urban	Europe	Italy	107
Rampelli_2020	SRR9654993	M	Urban	Europe	Italy	32
Rampelli_2020	SRR9654994	F	Urban	Europe	Italy	30
Rampelli_2020	SRR9654995	F	Urban	Europe	Italy	32
Rampelli_2020	SRR9654996	M	Urban	Europe	Italy	22
Rampelli_2020	SRR9654997	F	Urban	Europe	Italy	109
Rampelli_2020	SRR9654998	M	Urban	Europe	Italy	25
Rampelli_2020	SRR9654999	F	Urban	Europe	Italy	37
Rampelli_2020	SRR9655000	F	Urban	Europe	Italy	25
Rampelli_2020	SRR9655001	M	Urban	Europe	Italy	32
Rampelli_2020	SRR9655002	F	Urban	Europe	Italy	25
Rampelli_2020	SRR9655003	M	Urban	Europe	Italy	48
Rampelli_2020	SRR9655004	M	Urban	Europe	Italy	75
Rampelli_2020	SRR9655005	F	Urban	Europe	Italy	100
Rampelli_2020	SRR9655006	M	Urban	Europe	Italy	70
Rampelli_2020	SRR9655007	M	Urban	Europe	Italy	75
Rampelli_2020	SRR9655008	F	Urban	Europe	Italy	102
Rampelli_2020	SRR9655009	F	Urban	Europe	Italy	100
Rampelli_2020	SRR9655010	M	Urban	Europe	Italy	104
Rampelli_2020	SRR9655011	F	Urban	Europe	Italy	99
Rampelli_2020	SRR9655012	M	Urban	Europe	Italy	106
Rampelli_2020	SRR9655013	F	Urban	Europe	Italy	106
Rampelli_2020	SRR9655014	F	Urban	Europe	Italy	107
Rampelli_2020	SRR9655015	M	Urban	Europe	Italy	105
Rampelli_2020	SRR9655016	M	Urban	Europe	Italy	65
Rampelli_2020	SRR9655017	M	Urban	Europe	Italy	76
Rampelli_2020	SRR9655018	F	Urban	Europe	Italy	109
Rampelli_2020	SRR9655019	M	Urban	Europe	Italy	105
Rampelli_2020	SRR9655020	F	Urban	Europe	Italy	101
Rampelli_2020	SRR9655021	F	Urban	Europe	Italy	100
Rampelli_2020	SRR9655022	F	Urban	Europe	Italy	101
Rampelli_2020	SRR9655023	F	Urban	Europe	Italy	100
Rampelli_2020	SRR9655024	F	Urban	Europe	Italy	99
Rampelli_2020	SRR9655025	F	Urban	Europe	Italy	101
Rampelli_2020	SRR9655026	F	Urban	Europe	Italy	99
Rampelli_2020	SRR9655027	F	Urban	Europe	Italy	98
Rampelli_2020	SRR9655028	F	Urban	Europe	Italy	99
Rampelli_2020	SRR9655029	F	Urban	Europe	Italy	100
Rampelli_2020	SRR9655030	M	Urban	Europe	Italy	105
Rampelli_2020	SRR9655031	F	Urban	Europe	Italy	46
Smits	SRR5763445	F	Rural	Africa	Tanzania	55
Smits	SRR5763446	F	Rural	Africa	Tanzania	7
Smits	SRR5763447		Rural	Africa	Tanzania	0
Smits	SRR5763448	M	Rural	Africa	Tanzania	0
Smits	SRR5763449		Rural	Africa	Tanzania	0
Smits	SRR5763450		Rural	Africa	Tanzania	0
Smits	SRR5763451		Rural	Africa	Tanzania	0
Smits	SRR5763452		Rural	Africa	Tanzania	0
Smits	SRR5763453	M	Rural	Africa	Tanzania	9
Smits	SRR5763454		Rural	Africa	Tanzania	0
Smits	SRR5763455	M	Rural	Africa	Tanzania	33
Smits	SRR5763456	F	Rural	Africa	Tanzania	48
Smits	SRR5763457	F	Rural	Africa	Tanzania	49
Smits	SRR5763458	F	Rural	Africa	Tanzania	55
Smits	SRR5763459	F	Rural	Africa	Tanzania	48
Smits	SRR5763460		Rural	Africa	Tanzania
Smits	SRR5763461		Rural	Africa	Tanzania
Smits	SRR5763462	F	Rural	Africa	Tanzania	6
Smits	SRR5763463	M	Rural	Africa	Tanzania	35
Smits	SRR5763464		Rural	Africa	Tanzania
Smits	SRR5763465		Rural	Africa	Tanzania
Smits	SRR5763466	M	Rural	Africa	Tanzania	40
Smits	SRR5763467	F	Rural	Africa	Tanzania	49
Smits	SRR5763468	M	Rural	Africa	Tanzania	40
Smits	SRR5763469	M	Rural	Africa	Tanzania	13
Smits	SRR5763470	M	Rural	Africa	Tanzania	13
Smits	SRR5763471	M	Rural	Africa	Tanzania	35
Smits	SRR5763472	F	Rural	Africa	Tanzania	5
Smits	SRR5763473	F	Rural	Africa	Tanzania	7
Smits	SRR5763474	M	Rural	Africa	Tanzania	32
Smits	SRR5763475	M	Rural	Africa	Tanzania	35
Smits	SRR5763476	F	Rural	Africa	Tanzania	55
Smits	SRR5763477		Rural	Africa	Tanzania
Smits	SRR5763478	M	Rural	Africa	Tanzania	0
Smits	SRR5763479	M	Rural	Africa	Tanzania	40
Smits	SRR5763480	F	Rural	Africa	Tanzania	4
Smits	SRR5763481	F	Rural	Africa	Tanzania	6
Smits	SRR5763482	F	Rural	Africa	Tanzania	48
Smits	SRR5763483	M	Rural	Africa	Tanzania	12
Smits	SRR5763484	M	Rural	Africa	Tanzania	33
Vatanen	SRR4305033	M		Europe	Russia	1.35068	carrying HLA alleles
Vatanen	SRR4305056	M	Urban	Europe	Finland	2.94521	carrying HLA alleles
Vatanen	SRR4305072	M		Europe	Russia	1.09589	carrying HLA alleles
Vatanen	SRR4305073	M		Europe	Russia	1.36438	carrying HLA alleles
Vatanen	SRR4305077	M		Europe	Russia	0.583562	carrying HLA alleles
Vatanen	SRR4305097	M		Europe	Russia	1.10959	carrying HLA alleles
Vatanen	SRR4305123	M		Europe	Estonia	1.10137	carrying HLA alleles
Vatanen	SRR4305144	M		Europe	Estonia	1.32877	carrying HLA alleles
Vatanen	SRR4305155	M		Europe	Estonia	1.86849	carrying HLA alleles
Vatanen	SRR4305161	F	Urban	Europe	Finland	1.86301	carrying HLA alleles
Vatanen	SRR4305166	F	Urban	Europe	Finland	1.31233	carrying HLA alleles
Vatanen	SRR4305176	M		Europe	Russia	0.561644	carrying HLA alleles
Vatanen	SRR4305186	M	Urban	Europe	Finland	1.58082	carrying HLA alleles
Vatanen	SRR4305187	M		Europe	Russia	0.545205	carrying HLA alleles
Vatanen	SRR4305190	F		Europe	Russia	1.09589	carrying HLA alleles
Vatanen	SRR4305197	M		Europe	Estonia	1.3726	carrying HLA alleles
Vatanen	SRR4305202	F	Urban	Europe	Finland	0.263014	carrying HLA alleles
Vatanen	SRR4305204	M	Urban	Europe	Finland	0.334247	carrying HLA alleles
Vatanen	SRR4305211	F	Urban	Europe	Finland	1.8137	carrying HLA alleles
Vatanen	SRR4305213	M	Urban	Europe	Finland	1.80822	carrying HLA alleles
Vatanen	SRR4305222	M		Europe	Russia	0.843836	carrying HLA alleles
Vatanen	SRR4305227	F		Europe	Russia	0.830137	carrying HLA alleles
Vatanen	SRR4305229	M		Europe	Estonia	2.36986	carrying HLA alleles
Vatanen	SRR4305241	F	Urban	Europe	Finland	1.56986	carrying HLA alleles
Vatanen	SRR4305254	F		Europe	Russia	1.30137	carrying HLA alleles
Vatanen	SRR4305266	M		Europe	Russia	1.01644	carrying HLA alleles
Vatanen	SRR4305267	M		Europe	Russia	0.479452	carrying HLA alleles
Vatanen	SRR4305270	M		Europe	Russia	0.791781	carrying HLA alleles
Vatanen	SRR4305272	M		Europe	Russia	0.249315	carrying HLA alleles
Vatanen	SRR4305280	M	Urban	Europe	Finland	1.07123	carrying HLA alleles
Vatanen	SRR4305285	M		Europe	Russia	0.50411	carrying HLA alleles
Vatanen	SRR4305286	M		Europe	Russia	0.421918	carrying HLA alleles
Vatanen	SRR4305287	M		Europe	Russia	0.6	carrying HLA alleles
Vatanen	SRR4305300	F		Europe	Estonia	1.33973	carrying HLA alleles
Vatanen	SRR4305303	F		Europe	Russia	1.10959	carrying HLA alleles
Vatanen	SRR4305311	M		Europe	Estonia	1.87123	carrying HLA alleles
Vatanen	SRR4305312	F		Europe	Russia	1.29589	carrying HLA alleles
Vatanen	SRR4305321	F	Urban	Europe	Finland	2.98356	carrying HLA alleles
Vatanen	SRR4305346	F		Europe	Russia	0.643836	carrying HLA alleles
Vatanen	SRR4305348	F		Europe	Russia	0.564384	carrying HLA alleles
Vatanen	SRR4305360	M		Europe	Russia	1.50137	carrying HLA alleles
Vatanen	SRR4305392	M		Europe	Estonia	1.35342	carrying HLA alleles
Vatanen	SRR4305405	M		Europe	Russia	0.432877	carrying HLA alleles
Vatanen	SRR4305421	M		Europe	Russia	1.05205	carrying HLA alleles
Vatanen	SRR4305425	M	Urban	Europe	Finland	1.95068	carrying HLA alleles
Vatanen	SRR4305428	M	Urban	Europe	Finland	1.08493	carrying HLA alleles
Vatanen	SRR4305430	M		Europe	Russia	2.35068	carrying HLA alleles
Vatanen	SRR4305431	M	Urban	Europe	Finland	2.30137	carrying HLA alleles
Vatanen	SRR4305432	M	Urban	Europe	Finland	2.33151	carrying HLA alleles
Vatanen	SRR4305433	M		Europe	Estonia	1.33973	carrying HLA alleles
Vatanen	SRR4305435	F		Europe	Russia	1.74795	carrying HLA alleles
Vatanen	SRR4305437	M		Europe	Estonia	1.3726	carrying HLA alleles
Vatanen	SRR4305438	M		Europe	Russia	1.63836	carrying HLA alleles
Vatanen	SRR4305442	M	Urban	Europe	Finland	1.37534	carrying HLA alleles
Vatanen	SRR4305444	M	Urban	Europe	Finland	1.86849	carrying HLA alleles
Vatanen	SRR4305445	M		Europe	Estonia	2.19452	carrying HLA alleles
Vatanen	SRR4305451	F		Europe	Russia	0.915068	carrying HLA alleles
Vatanen	SRR4305452	M		Europe	Russia	2.0137	carrying HLA alleles
Vatanen	SRR4305453	F	Urban	Europe	Finland	1.33425	carrying HLA alleles
Vatanen	SRR4305454	M		Europe	Russia	1.98082	carrying HLA alleles
Vatanen	SRR4305455	M	Urban	Europe	Finland	3.01644	carrying HLA alleles
Vatanen	SRR4305456	M	Urban	Europe	Finland	2.34521	carrying HLA alleles
Vatanen	SRR4305460	F		Europe	Russia	0.980822	carrying HLA alleles
Vatanen	SRR4305461	F		Europe	Estonia	3.01918	carrying HLA alleles
Vatanen	SRR4305462	M	Urban	Europe	Finland	1.3863	carrying HLA alleles
Vatanen	SRR4305463	F		Europe	Russia	2	carrying HLA alleles
Vatanen	SRR4305465	M		Europe	Russia	1.58904	carrying HLA alleles
Vatanen	SRR4305466	F		Europe	Russia	2.40822	carrying HLA alleles
Vatanen	SRR4305470	M	Urban	Europe	Finland	1.56438	carrying HLA alleles
Vatanen	SRR4305473	F		Europe	Russia	1.43288	carrying HLA alleles
Vatanen	SRR4305474	M	Urban	Europe	Finland	1.33699	carrying HLA alleles
Vatanen	SRR4305481	M		Europe	Russia	0.756164	carrying HLA alleles
Vatanen	SRR4305482	M		Europe	Russia	1.85205	carrying HLA alleles
Vatanen	SRR4305484	F	Urban	Europe	Finland	1.31781	carrying HLA alleles
Vatanen	SRR4305530	F		Europe	Russia	3.01644	carrying HLA alleles
Vatanen	SRR4408001	M	Urban	Europe	Finland	3.03014	carrying HLA alleles
Vatanen	SRR4408005	M	Urban	Europe	Finland	1.08219	carrying HLA alleles
Vatanen	SRR4408007	M	Urban	Europe	Finland	2.24932	carrying HLA alleles
Vatanen	SRR4408017	F		Europe	Estonia	3.01096	carrying HLA alleles
Vatanen	SRR4408018	M		Europe	Russia	1.00822	carrying HLA alleles
Vatanen	SRR4408023	M		Europe	Russia	1.3863	carrying HLA alleles
Vatanen	SRR4408028	M		Europe	Estonia	1.86849	carrying HLA alleles
Vatanen	SRR4408030	M	Urban	Europe	Finland	0.879452	carrying HLA alleles
Vatanen	SRR4408031	F	Urban	Europe	Finland	2.34247	carrying HLA alleles
Vatanen	SRR4408044	F	Urban	Europe	Finland	0.605479	carrying HLA alleles
Vatanen	SRR4408050	F		Europe	Estonia	1.32877	carrying HLA alleles
Vatanen	SRR4408051	M		Europe	Estonia	0.372603	carrying HLA alleles
Vatanen	SRR4408052	M	Urban	Europe	Finland	0.123288	carrying HLA alleles
Vatanen	SRR4408053	F	Urban	Europe	Finland	1.34795	carrying HLA alleles
Vatanen	SRR4408054	M		Europe	Russia	0.534247	carrying HLA alleles
Vatanen	SRR4408059	M	Urban	Europe	Finland	0.435616	carrying HLA alleles
Vatanen	SRR4408060	M		Europe	Estonia	1.09315	carrying HLA alleles
Vatanen	SRR4408061	F	Urban	Europe	Finland	1.01644	carrying HLA alleles
Vatanen	SRR4408063	M		Europe	Estonia	0.863014	carrying HLA alleles
Vatanen	SRR4408066	F	Urban	Europe	Finland	1.08493	carrying HLA alleles
Vatanen	SRR4408071	F		Europe	Russia	2.70685	carrying HLA alleles
Vatanen	SRR4408072	M		Europe	Estonia	0.29589	carrying HLA alleles
Vatanen	SRR4408074	F		Europe	Estonia	0.120548	carrying HLA alleles
Vatanen	SRR4408077	F		Europe	Estonia	0.112329	carrying HLA alleles
Vatanen	SRR4408078	M	Urban	Europe	Finland	0.619178	carrying HLA alleles
Vatanen	SRR4408081	M		Europe	Estonia	0.484932	carrying HLA alleles
Vatanen	SRR4408084	F	Urban	Europe	Finland	0.115068	carrying HLA alleles
Vatanen	SRR4408085	M	Urban	Europe	Finland	0.326027	carrying HLA alleles
Vatanen	SRR4408090	M	Urban	Europe	Finland	0.591781	carrying HLA alleles
Vatanen	SRR4408091	M		Europe	Estonia	1.82466	carrying HLA alleles
Vatanen	SRR4408095	M		Europe	Estonia	0.328767	carrying HLA alleles
Vatanen	SRR4408096	M		Europe	Estonia	1.85753	carrying HLA alleles
Vatanen	SRR4408097	F		Europe	Estonia	0.591781	carrying HLA alleles
Vatanen	SRR4408098	M	Urban	Europe	Finland	0.539726	carrying HLA alleles
Vatanen	SRR4408106	M	Urban	Europe	Finland	0.287671	carrying HLA alleles
Vatanen	SRR4408107	M		Europe	Estonia	0.873973	carrying HLA alleles
Vatanen	SRR4408117	M		Europe	Estonia	0.169863	carrying HLA alleles
Vatanen	SRR4408119	M		Europe	Russia	2.47123	carrying HLA alleles
Vatanen	SRR4408120	F		Europe	Russia	1.50685	carrying HLA alleles
Vatanen	SRR4408121	F		Europe	Estonia	1.6137	carrying HLA alleles
Vatanen	SRR4408122	F	Urban	Europe	Finland	0.873973	carrying HLA alleles
Vatanen	SRR4408125	F	Urban	Europe	Finland	0.142466	carrying HLA alleles
Vatanen	SRR4408127	F		Europe	Estonia	0.331507	carrying HLA alleles
Vatanen	SRR4408128	M	Urban	Europe	Finland	0.854795	carrying HLA alleles
Vatanen	SRR4408133	F	Urban	Europe	Finland	1.35068	carrying HLA alleles
Vatanen	SRR4408134	F	Urban	Europe	Finland	0.334247	carrying HLA alleles
Vatanen	SRR4408135	M	Urban	Europe	Finland	0.569863	carrying HLA alleles
Vatanen	SRR4408141	F	Urban	Europe	Finland	0.939726	carrying HLA alleles
Vatanen	SRR4408142	F	Urban	Europe	Finland	1.50411	carrying HLA alleles
Vatanen	SRR4408149	M	Urban	Europe	Finland	0.372603	carrying HLA alleles
Vatanen	SRR4408150	M		Europe	Russia	1.00548	carrying HLA alleles
Vatanen	SRR4408151	F		Europe	Russia	1.00274	carrying HLA alleles
Vatanen	SRR4408152	F	Urban	Europe	Finland	0.331507	carrying HLA alleles
Vatanen	SRR4408154	M		Europe	Estonia	2.3589	carrying HLA alleles
Vatanen	SRR4408159	M	Urban	Europe	Finland	0.128767	carrying HLA alleles
Vatanen	SRR4408200	M		Europe	Russia	0.786301	carrying HLA alleles
Vatanen	SRR4408207	F	Urban	Europe	Finland	0.583562	carrying HLA alleles
Vatanen	SRR4408208	M		Europe	Estonia	0.893151	carrying HLA alleles
Vatanen	SRR4408211	M		Europe	Russia	1.01096	carrying HLA alleles
Vatanen	SRR4408216	M		Europe	Russia	1.30685	carrying HLA alleles
Vatanen	SRR4408218	F		Europe	Russia	1.91507	carrying HLA alleles
Vatanen	SRR4408219	M	Urban	Europe	Finland	1.58356	carrying HLA alleles
Vatanen	SRR4408220	M		Europe	Estonia	2.36438	carrying HLA alleles
Vatanen	SRR4408223	M	Urban	Europe	Finland	1.36438	carrying HLA alleles
Vatanen	SRR4408232	M		Europe	Russia	0.873973	carrying HLA alleles
Vatanen	SRR4408233	F		Europe	Russia	1.37808	carrying HLA alleles
Vatanen	SRR4408240	F		Europe	Estonia	1.24932	carrying HLA alleles
Vatanen	SRR4408243	M	Urban	Europe	Finland	1.09315	carrying HLA alleles
Vatanen	SRR4408246	M		Europe	Estonia	2.40548	carrying HLA alleles
Vatanen	SRR4408253	F		Europe	Russia	1.50685	carrying HLA alleles
Vatanen	SRR4408254	F		Europe	Estonia	1.61644	carrying HLA alleles
Vatanen	SRR4408257	F	Urban	Europe	Finland	3.03836	carrying HLA alleles
Vatanen	SRR4408260	F		Europe	Estonia	0.857534	carrying HLA alleles
Vatanen	SRR4408268	M		Europe	Russia	2.04658	carrying HLA alleles
Vatanen	SRR4408272	M		Europe	Russia	2.28219	carrying HLA alleles
Vatanen	SRR4408273	M		Europe	Estonia	1.35068	carrying HLA alleles
Vatanen	SRR4408276	F		Europe	Russia	1.68493	carrying HLA alleles
Vatanen	SRR4408279	F		Europe	Russia	1.31781	carrying HLA alleles
Vatanen	SRR4408286	F		Europe	Russia	1.41918	carrying HLA alleles
Vatanen	SRR4408287	F	Urban	Europe	Finland	1.32877	carrying HLA alleles
Vatanen	SRR4408288	M		Europe	Russia	1.53699	carrying HLA alleles
Vatanen	SRR4408291	F		Europe	Russia	1.81644	carrying HLA alleles
Vatanen	SRR4408292	F		Europe	Estonia	1.84384	carrying HLA alleles
Vatanen	SRR4408293	M	Urban	Europe	Finland	2.99452	carrying HLA alleles
Zeller	CCIS00146684ST-4-0	F		Europe	France	72	Normal	25	overweight
Zeller	CCIS00281083ST-3-0	M		Europe	France	53	Normal	32	obesity
Zeller	CCIS02124300ST-4-0	M		Europe	France	35	Normal	23	normal
Zeller	CCIS02379307ST-4-0	M		Europe	France	67	Cancer	28	overweight
Zeller	CCIS02856720ST-4-0	M		Europe	France	74	Normal	27	overweight
Zeller	CCIS03473770ST-4-0	M		Europe	France	29	Normal	24.49	normal
Zeller	CCIS03857607ST-4-0	M		Europe	France	61	Normal	23	normal
Zeller	CCIS05314658ST-4-0	F		Europe	France	65	Normal	24	normal
Zeller	CCIS06260551ST-3-0	M		Europe	France	58	Cancer	24	normal
Zeller	CCIS07277498ST-4-0	M		Europe	France	63	Normal
Zeller	CCIS07539127ST-4-0	F		Europe	France	77	Normal	22	normal
Zeller	CCIS07648107ST-4-0	F		Europe	France	62	Normal	21	normal
Zeller	CCIS08668806ST-3-0	M		Europe	France	63	Small adenoma	26	overweight
Zeller	CCIS09568613ST-4-0	M		Europe	France	67	Normal	21	normal
Zeller	CCIS10706551ST-3-0	M		Europe	France	25	Normal	24.15	normal
Zeller	CCIS10793554ST-4-0	M		Europe	France	64	Small adenoma	26	overweight
Zeller	CCIS11015875ST-4-0	M		Europe	France	62	Cancer	26	overweight
Zeller	CCIS11019776ST-4-0	M		Europe	France	58	Large adenoma	22	normal
Zeller	CCIS11354283ST-4-0	M		Europe	France	67	Normal	27	overweight
Zeller	CCIS11362406ST-4-0	F		Europe	France	44	Normal	26	overweight
Zeller	CCIS11558985ST-4-0	F		Europe	France	56	Normal
Zeller	CCIS12370844ST-4-0	F		Europe	France	81	Cancer	38.71	obesity
Zeller	CCIS12656533ST-4-0	M		Europe	France	51	Cancer	30	overweight
Zeller	CCIS13047523ST-4-0	M		Europe	France	70	Normal	22	normal
Zeller	CCIS14449628ST-4-0	F		Europe	France	59	Cancer	20	normal
Zeller	CCIS15704761ST-4-0	F		Europe	France	56	Cancer
Zeller	CCIS15794887ST-4-0	F		Europe	France	37	Normal	18	underweight
Zeller	CCIS16326685ST-4-0	F		Europe	France	46	Normal	29	overweight
Zeller	CCIS16383318ST-4-0	F		Europe	France	61	Normal	24	normal
Zeller	CCIS16561622ST-4-0	M		Europe	France	54	Normal	26	overweight
Zeller	CCIS17669415ST-4-0	F		Europe	France	72	Cancer	37	obesity
Zeller	CCIS19142497ST-3-0	M		Europe	France	68	Large adenoma	23	normal
Zeller	CCIS20795251ST-4-0	F		Europe	France	71	Normal	23	normal
Zeller	CCIS21126322ST-4-0	M		Europe	France	59	Normal	25	overweight
Zeller	CCIS21278152ST-4-0	M		Europe	France	63	Cancer	25	overweight
Zeller	CCIS22275061ST-4-0	M		Europe	France	62	Large adenoma	29	overweight
Zeller	CCIS22416007ST-4-0	M		Europe	France	82	Cancer	24.49	normal
Zeller	CCIS22906510ST-20-0	M		Europe	France	77	Small adenoma	23	normal
Zeller	CCIS22958137ST-20-0	M		Europe	France	60	Cancer	26	overweight
Zeller	CCIS23164343ST-4-0	M		Europe	France	62	Normal	23	normal
Zeller	CCIS24254057ST-4-0	F		Europe	France	69	Cancer	24	normal
Zeller	CCIS24898163ST-4-0	M		Europe	France	59	Small adenoma	31	obesity
Zeller	CCIS25399172ST-4-0	M		Europe	France	60	Small adenoma	27	overweight
Zeller	CCIS27304052ST-3-0	F		Europe	France	52	Normal	20	normal
Zeller	CCIS27927933ST-4-0	M		Europe	France	72	Normal	24	normal
Zeller	CCIS28384594ST-4-0	M		Europe	France	89	Large adenoma	24	normal
Zeller	CCIS29210128ST-4-0	M		Europe	France	64	Normal	27	overweight
Zeller	CCIS29688262ST-20-0	M		Europe	France	50	Normal	25	overweight
Zeller	CCIS31434951ST-20-0	M		Europe	France	66	Small adenoma	24	normal
Zeller	CCIS32105356ST-4-0	M		Europe	France	53	Small adenoma	30	overweight
Zeller	CCIS32452666ST-4-0	M		Europe	France	68	Normal	26	overweight
Zeller	CCIS33816588ST-4-0	M		Europe	France	64	Cancer	21	normal
Zeller	CCIS34055159ST-4-0	M		Europe	France	80	Cancer	29.4	overweight
Zeller	CCIS34604008ST-4-0	F		Europe	France	63	Normal	27	overweight
Zeller	CCIS35092938ST-4-0	F		Europe	France	62	Small adenoma	21	normal
Zeller	CCIS35100175ST-4-0	M		Europe	France	73	Cancer	40	obesity
Zeller	CCIS36699628ST-4-0	F		Europe	France	68	Normal	25	overweight
Zeller	CCIS36797902ST-4-0	M		Europe	France	63	Normal	25	overweight
Zeller	CCIS37250421ST-4-0	F		Europe	France	59	Small adenoma	21	normal
Zeller	CCIS38765456ST-20-0	F		Europe	France	79	Cancer	22	normal
Zeller	CCIS40244499ST-3-0	F		Europe	France	87	Cancer	32.42	obesity
Zeller	CCIS41222843ST-4-0	F		Europe	France	73	Cancer	24	normal
Zeller	CCIS41288781ST-4-0	F		Europe	France	74	Cancer	19	normal
Zeller	CCIS41548810ST-4-0	M		Europe	France	78	Cancer	19	normal
Zeller	CCIS41692898ST-4-0	F		Europe	France	67	Normal	28	overweight
Zeller	CCIS41806458ST-4-0	F		Europe	France	59	Small adenoma
Zeller	CCIS44093303ST-4-0	F		Europe	France	62	Normal	20	normal
Zeller	CCIS44676181ST-4-0	F		Europe	France	48	Small adenoma	21	normal
Zeller	CCIS44743950ST-4-0	M		Europe	France	66	Small adenoma	22	normal
Zeller	CCIS44757994ST-4-0	M		Europe	France	75	Cancer	37	obesity
Zeller	CCIS45571137ST-3-0	F		Europe	France	55	Normal	20	normal
Zeller	CCIS45793747ST-4-0	M		Europe	France	67	Normal	25	overweight
Zeller	CCIS46047672ST-4-0	M		Europe	France	65	Cancer	24	normal
Zeller	CCIS46467422ST-4-0	F		Europe	France	54	Cancer	22	normal
Zeller	CCIS47284573ST-4-0	M		Europe	France	67	Cancer	25	overweight
Zeller	CCIS47745468ST-4-0	M		Europe	France	63	Large adenoma	27	overweight
Zeller	CCIS48174381ST-4-0	M		Europe	France	66	Normal	25	overweight
Zeller	CCIS48507077ST-4-0	F		Europe	France	72	Small adenoma	32	obesity
Zeller	CCIS48579360ST-4-0	F		Europe	France	52	Small adenoma	23	normal
Zeller	CCIS48725289ST-4-0	F		Europe	France	62	Cancer	21	normal
Zeller	CCIS50003399ST-4-0	F		Europe	France	66	Normal	28	overweight
Zeller	CCIS50148151ST-4-0	F		Europe	France	87	Cancer	15.15	underweight
Zeller	CCIS50369211ST-20-0	F		Europe	France	53	Small adenoma	33	obesity
Zeller	CCIS50471204ST-4-0	F		Europe	France	61	Normal	23	normal
Zeller	CCIS50561855ST-4-0	F		Europe	France	60	Large adenoma	26	overweight
Zeller	CCIS51595129ST-4-0	F		Europe	France	63	Normal	22	normal
Zeller	CCIS51667829ST-4-0	M		Europe	France	63	Small adenoma	26	overweight
Zeller	CCIS52234160ST-4-0	M		Europe	France	64	Large adenoma	28	overweight
Zeller	CCIS52370277ST-4-0	M		Europe	France	53	Cancer	25	overweight
Zeller	CCIS53043478ST-4-0	M		Europe	France	72	Cancer	22	normal
Zeller	CCIS53355328ST-4-0	M		Europe	France	76	Cancer
Zeller	CCIS53557295ST-4-0	M		Europe	France	45	Small adenoma	24	normal
Zeller	CCIS54027808ST-4-0	M		Europe	France	52	Small adenoma	33	obesity
Zeller	CCIS55230578ST-4-0	M		Europe	France	64	Cancer	30	overweight
Zeller	CCIS55531770ST-4-0	F		Europe	France	45	Small adenoma	24	normal
Zeller	CCIS56503244ST-3-0	M		Europe	France	68	Large adenoma	21	normal
Zeller	CCIS58234805ST-4-0	F		Europe	France	70	Cancer	26	overweight
Zeller	CCIS59132091ST-4-0	F		Europe	France	80	Cancer	23.19	normal
Zeller	CCIS59903910ST-4-0	F		Europe	France	76	Small adenoma	34	obesity
Zeller	CCIS61287323ST-4-0	M		Europe	France	76	Cancer	25	overweight
Zeller	CCIS62605362ST-3-0	F		Europe	France	56	Cancer	23	normal
Zeller	CCIS62794166ST-4-0	M		Europe	France	68	Cancer	23	normal
Zeller	CCIS63448910ST-4-0	F		Europe	France	61	Normal	34	obesity
Zeller	CCIS63468405ST-4-0	F		Europe	France	69	Normal	25	overweight
Zeller	CCIS63910149ST-4-0	F		Europe	France	49	Normal	23	normal
Zeller	CCIS64773582ST-4-0	F		Europe	France	63	Normal	23	normal
Zeller	CCIS64785924ST-20-0	F		Europe	France	59	Normal	25	overweight
Zeller	CCIS65479369ST-4-0	F		Europe	France	69	Cancer	25	overweight
Zeller	CCIS70398272ST-4-0	M		Europe	France	55	Small adenoma	24	normal
Zeller	CCIS71301801ST-4-0	F		Europe	France	50	Cancer	24	normal
Zeller	CCIS71578391ST-4-0	M		Europe	France	70	Normal	25	overweight
Zeller	CCIS72607085ST-4-0	F		Europe	France	74	Cancer	26	overweight
Zeller	CCIS74239020ST-4-0	M		Europe	France	62	Normal	24	normal
Zeller	CCIS74726977ST-3-0	M		Europe	France	66	Small adenoma	24	normal
Zeller	CCIS76563044ST-4-0	M		Europe	France	68	Small adenoma	36	obesity
Zeller	CCIS76845094ST-20-0	M		Europe	France	44	Cancer	20	normal
Zeller	CCIS77100899ST-4-0	M		Europe	France	73	Large adenoma	26	overweight
Zeller	CCIS77252613ST-4-0	M		Europe	France	65	Cancer	26	overweight
Zeller	CCIS78100604ST-4-0	F		Europe	France	64	Normal	30	overweight
Zeller	CCIS78318719ST-4-0	F		Europe	France	69	Cancer	30	overweight
Zeller	CCIS79210440ST-3-0	M		Europe	France	65	Normal	30	overweight
Zeller	CCIS80834637ST-4-0	F		Europe	France	60	Normal	28	overweight
Zeller	CCIS81139242ST-4-0	F		Europe	France	64	Normal	20	normal
Zeller	CCIS81710917ST-20-0	M		Europe	France	49	Small adenoma	20	normal
Zeller	CCIS81735969ST-20-0	M		Europe	France	68	Large adenoma	26	overweight
Zeller	CCIS81887263ST-4-0	M		Europe	France	59	Cancer	27	overweight
Zeller	CCIS82146115ST-4-0	M		Europe	France	51	Cancer	24	normal
Zeller	CCIS82507866ST-3-0	M		Europe	France	57	Normal	24	normal
Zeller	CCIS82944710ST-20-0	F		Europe	France	38	Normal	22	normal
Zeller	CCIS83445808ST-4-0	M		Europe	France	66	Small adenoma	29	overweight
Zeller	CCIS83574003ST-4-0	M		Europe	France	60	Large adenoma	24	normal
Zeller	CCIS83870198ST-4-0	F		Europe	France	48	Cancer	24	normal
Zeller	CCIS84543192ST-4-0	F		Europe	France	45	Cancer	28	overweight
Zeller	CCIS85214191ST-3-0	M		Europe	France	63	Cancer	22	normal
Zeller	CCIS87116798ST-4-0	F		Europe	France	85	Cancer	20.31	normal
Zeller	CCIS87167916ST-4-0	M		Europe	France	79	Cancer	30	overweight
Zeller	CCIS87252800ST-4-0	M		Europe	France	73	Cancer	17	underweight
Zeller	CCIS87290971ST-4-0	M		Europe	France	71	Large adenoma	29	overweight
Zeller	CCIS87605453ST-4-0	F		Europe	France	73	Cancer	26	overweight
Zeller	CCIS88007743ST-4-0	F		Europe	France	67	Normal	23	normal
Zeller	CCIS88317640ST-4-0	M		Europe	France	74	Normal	27	overweight
Zeller	CCIS90164298ST-4-0	M		Europe	France	84	Normal	23	normal
Zeller	CCIS90166425ST-4-0	F		Europe	France	78	Large adenoma	23	normal
Zeller	CCIS90443472ST-4-0	M		Europe	France	63	Large adenoma	30	overweight
Zeller	CCIS90903952ST-3-0	F		Europe	France	71	Large adenoma	22	normal
Zeller	CCIS91228662ST-4-0	M		Europe	France	63	Cancer	31	obesity
Zeller	CCIS93040568ST-20-0	M		Europe	France	65	Normal	30	overweight
Zeller	CCIS94417875ST-3-0	F		Europe	France	59	Normal	25	overweight
Zeller	CCIS94496512ST-4-0	M		Europe	France	64	Small adenoma	28	overweight
Zeller	CCIS94603952ST-4-0	F		Europe	France	80	Normal	21	normal
Zeller	CCIS95097901ST-4-0	M		Europe	France	52	Normal	24	normal
Zeller	CCIS95409808ST-4-0	F		Europe	France	63	Normal	21	normal
Zeller	CCIS96387239ST-4-0	M		Europe	France	66	Small adenoma	20	normal
Zeller	CCIS98482370ST-3-0	F		Europe	France	53	Normal	30	overweight
Zeller	CCIS98512455ST-4-0	M		Europe	France	63	Cancer	29	overweight
Zeller	CCIS98832363ST-4-0	F		Europe	France	55	Cancer	25	overweight
Zeller	CCMD11006829ST-21-0	F		Europe	Germany	42	Cancer	34.8	obesity
Zeller	CCMD12232071ST-21-0	M		Europe	Germany	75	Cancer	27.8	overweight
Zeller	CCMD13071240ST-21-0	F		Europe	Germany	66	Cancer	23	normal
Zeller	CCMD13934959ST-21-0	M		Europe	Germany	56	Cancer	26.8	overweight
Zeller	CCMD14479708ST-21-0	M		Europe	Germany	74	Cancer	25.5	overweight
Zeller	CCMD18872694ST-21-0	M		Europe	Germany	63	Cancer	25.3	overweight
Zeller	CCMD19497912ST-21-0	F		Europe	Germany	53	Cancer	32	obesity
Zeller	CCMD23101338ST-21-0	M		Europe	Germany	69	Cancer	27.8	overweight
Zeller	CCMD25511638ST-21-0	F		Europe	Germany	72	Cancer	24.3	normal
Zeller	CCMD25963797ST-21-0	M		Europe	Germany	62	Cancer	21.7	normal
Zeller	CCMD26709089ST-21-0	M		Europe	Germany	66	Cancer	25.5	overweight
Zeller	CCMD26925580ST-21-0	M		Europe	Germany	42	Cancer	27.4	overweight
Zeller	CCMD34381688ST-21-0	M		Europe	Germany	41	Cancer	21.9	normal
Zeller	CCMD35802077ST-21-0	M		Europe	Germany	71	Cancer	29.7	overweight
Zeller	CCMD40701343ST-21-0	M		Europe	Germany	65	Cancer	27.7	overweight
Zeller	CCMD42428553ST-21-0	M		Europe	Germany	87	Cancer	22	normal
Zeller	CCMD45988061ST-21-0	F		Europe	Germany	62	Cancer	26.6	overweight
Zeller	CCMD46222674ST-21-0	M		Europe	Germany	59	Cancer	23.7	normal
Zeller	CCMD46947453ST-21-0	M		Europe	Germany	69	Cancer	24.3072	normal
Zeller	CCMD48236717ST-21-0	F		Europe	Germany	58	Cancer	32.4	obesity
Zeller	CCMD50071957ST-21-0	F		Europe	Germany	35	Cancer	22.3	normal
Zeller	CCMD51864103ST-21-0	M		Europe	Germany	58	Cancer	25.2	overweight
Zeller	CCMD60079086ST-21-0	F		Europe	Germany	73	Cancer	22.4	normal
Zeller	CCMD63399960ST-21-0	M		Europe	Germany	51	Cancer	27.7489	overweight
Zeller	CCMD64503764ST-21-0	M		Europe	Germany	66	Cancer	31.1	obesity
Zeller	CCMD64776337ST-21-0	F		Europe	Germany	79	Cancer	26.4	overweight
Zeller	CCMD72895164ST-21-0	M		Europe	Germany	34	Cancer	26.8	overweight
Zeller	CCMD74930188ST-21-0	M		Europe	Germany	67	Cancer	30.1	obesity
Zeller	CCMD79987997ST-21-0	M		Europe	Germany	70	Cancer	25.2	overweight
Zeller	CCMD82866709ST-21-0	F		Europe	Germany	77	Cancer	26.2	overweight
Zeller	CCMD86114146ST-21-0	M		Europe	Germany	68	Cancer	22.7	normal
Zeller	CCMD86707194ST-21-0	F		Europe	Germany	53	Cancer	30.5	obesity
Zeller	CCMD87156761ST-21-0	M		Europe	Germany	55	Cancer	27.5	overweight
Zeller	CCMD88272491ST-21-0	M		Europe	Germany	72	Cancer	27.7	overweight
Zeller	CCMD90311071ST-21-0	F		Europe	Germany	43	Cancer	22.1	normal
Zeller	CCMD93344354ST-21-0	M		Europe	Germany	51	Cancer	29.7	overweight
Zeller	CCMD95433940ST-21-0	F		Europe	Germany	49	Cancer	30.3	obesity
Zeller	CCMD96553385ST-21-0	M		Europe	Germany	90	Cancer	27.7	overweight
Zeller	MMPU29365221ST	M		Europe	Germany	34	Normal	23.3	normal
Zeller	MMPU68403337ST	M		Europe	Germany	30	Normal	31.2	obesity
Zeller	MMPU72854103ST	M		Europe	Germany	34	Normal	21.1	normal
Zeller	MMPU84450604ST	M		Europe	Germany	37	Normal	25	overweight
Zeller	MMPU99077057ST	M		Europe	Germany	49	Normal	26.3	overweight
Zhang	ERR589440			Asia	China
Zhang	ERR589441			Asia	China
Zhang	ERR589442			Asia	China
Zhang	ERR589443			Asia	China
Zhang	ERR589448			Asia	China
Zhang	ERR589452			Asia	China
Zhang	ERR589485			Asia	China
Zhang	ERR589501			Asia	China
Zhang	ERR589502			Asia	China
Zhang	ERR589503			Asia	China
Zhang	ERR589504			Asia	China
Zhang	ERR589505			Asia	China
Zhang	ERR589506			Asia	China
Zhang	ERR589507			Asia	China
Zhang	ERR589508			Asia	China
Zhang	ERR589509			Asia	China
Zhang	ERR589510			Asia	China
Zhang	ERR589511			Asia	China
Zhang	ERR589512			Asia	China
Zhang	ERR589513			Asia	China
Zhang	ERR589527			Asia	China
Zhang	ERR589528			Asia	China
Zhang	ERR589529			Asia	China
Zhang	ERR589530			Asia	China
Zhang	ERR589531			Asia	China
Zhang	ERR589532			Asia	China
Zhang	ERR589533			Asia	China
Zhang	ERR589534			Asia	China
Zhang	ERR589535			Asia	China
Zhang	ERR589536			Asia	China
Zhang	ERR589537			Asia	China
Zhang	ERR589538			Asia	China
Zhang	ERR589539			Asia	China
Zhang	ERR589540			Asia	China
Zhang	ERR589542			Asia	China
Zhang	ERR589543			Asia	China
Zhang	ERR589544			Asia	China
Zhang	ERR589545			Asia	China
Zhang	ERR589546			Asia	China
Zhang	ERR589547			Asia	China
Zhang	ERR589548			Asia	China
Zhang	ERR589549			Asia	China
Zhang	ERR589550			Asia	China
Zhang	ERR589551			Asia	China
Zhang	ERR589552			Asia	China
Zhang	ERR589553			Asia	China
Zhang	ERR589554			Asia	China
Zhang	ERR589555			Asia	China
Zhang	ERR589556			Asia	China
Zhang	ERR589557			Asia	China
Zhang	ERR589558			Asia	China
Zhang	ERR589559			Asia	China
Zhang	ERR589560			Asia	China
Zhang	ERR589561			Asia	China
Zhang	ERR589562			Asia	China
Zhang	ERR589563			Asia	China
Zhang	ERR589564			Asia	China
Zhang	ERR589565			Asia	China
Zhang	ERR589566			Asia	China
Zhang	ERR589567			Asia	China
Zhang	ERR589568			Asia	China
Zhang	ERR589569			Asia	China
Zhang	ERR589570			Asia	China
Zhang	ERR589571			Asia	China
Zhang	ERR589572			Asia	China
Zhang	ERR589573			Asia	China
Zhang	ERR589574			Asia	China
Zhang	ERR589575			Asia	China
Zhang	ERR589576			Asia	China
Zhang	ERR589577			Asia	China
Zhang	ERR589578			Asia	China
Zhang	ERR589579			Asia	China
Zhang	ERR589580			Asia	China
Zhang	ERR589581			Asia	China
Zhang	ERR589582			Asia	China
Zhang	ERR589583			Asia	China
Zhang	ERR589584			Asia	China
Zhang	ERR589585			Asia	China
Zhang	ERR589586			Asia	China
Zhang	ERR589587			Asia	China
Zhang	ERR589588			Asia	China
Zhang	ERR589589			Asia	China
Zhang	ERR589590			Asia	China
Zhang	ERR589591			Asia	China
Zhang	ERR589592			Asia	China
Zhang	ERR589593			Asia	China
Zhang	ERR589594			Asia	China
Zhang	ERR589595			Asia	China
Zhang	ERR589732			Asia	China
Zhang	ERR589733			Asia	China
Zhang	ERR589734			Asia	China
Zhang	ERR589735			Asia	China
Zhang	ERR589736			Asia	China
Zhang	ERR589737			Asia	China
Zhang	ERR589738			Asia	China
Zhang	ERR589739			Asia	China
Zhang	ERR589740			Asia	China
Zhang	ERR589741			Asia	China
Zhang	ERR589742			Asia	China
Zhang	ERR589743			Asia	China
Zhang	ERR589744			Asia	China
Zhang	ERR589745			Asia	China
Zhang	ERR589746			Asia	China
Zhang	ERR589747			Asia	China
Zhang	ERR589748			Asia	China
Zhang	ERR589749			Asia	China
Zhang	ERR589750			Asia	China
Zhang	ERR589751			Asia	China
Zhang	ERR589752			Asia	China
Zhang	ERR589753			Asia	China
Zhang	ERR589754			Asia	China
Zhang	ERR589755			Asia	China
Zhang	ERR589756			Asia	China
Zhang	ERR589757			Asia	China
Zhang	ERR589758			Asia	China
Zhang	ERR589759			Asia	China
Zhang	ERR589760			Asia	China
Zhang	ERR589761			Asia	China
Zhang	ERR589762			Asia	China
Zhang	ERR589763			Asia	China
Zhang	ERR589764			Asia	China
Zhang	ERR589765			Asia	China
Zhang	ERR589766			Asia	China
Zhang	ERR589767			Asia	China
Zhang	ERR589768			Asia	China
Zhang	ERR589769			Asia	China
Zhang	ERR589770			Asia	China
Zhang	ERR589771			Asia	China
Zhang	ERR589772			Asia	China
Zhang	ERR589773			Asia	China
Zhang	ERR589774			Asia	China
Zhang	ERR589775			Asia	China
Zhang	ERR589776			Asia	China
Zhang	ERR589777			Asia	China
Zhang	ERR589778			Asia	China
Zhang	ERR589779			Asia	China
Zhang	ERR589780			Asia	China
Zhang	ERR589781			Asia	China
Zhang	ERR589782			Asia	China
Zhang	ERR589783			Asia	China
Zhang	ERR589784			Asia	China
Zhang	ERR589785			Asia	China
Zhang	ERR589786			Asia	China
Zhang	ERR589787			Asia	China
Zhang	ERR589788			Asia	China
Zhang	ERR589789			Asia	China
Zhang	ERR589790			Asia	China
Zhang	ERR589791			Asia	China
Zhang	ERR589792			Asia	China
Zhang	ERR589793			Asia	China
Zhang	ERR589794			Asia	China
Zhang	ERR589795			Asia	China
Zhang	ERR589796			Asia	China
Zhang	ERR589797			Asia	China
Zhang	ERR589798			Asia	China
Zhang	ERR589799			Asia	China
Zhang	ERR589800			Asia	China
Zhang	ERR589801			Asia	China
Zhang	ERR589802			Asia	China
Zhang	ERR589803			Asia	China
Zhang	ERR589804			Asia	China
Zhang	ERR589805			Asia	China
Zhang	ERR589806			Asia	China
Zhang	ERR589807			Asia	China
Zhang	ERR589808			Asia	China
Zhang	ERR589809			Asia	China
Zhang	ERR589810			Asia	China
Zhang	ERR589811			Asia	China
Zhang	ERR589812			Asia	China
Zhang	ERR589813			Asia	China
Zhang	ERR589814			Asia	China
Zhang	ERR589815			Asia	China
Zhang	ERR589816			Asia	China
Zhang	ERR589817			Asia	China
Zhang	ERR589818			Asia	China
Zhang	ERR589819			Asia	China
Zhang	ERR589820			Asia	China
Zhang	ERR589821			Asia	China
Zhang	ERR589822			Asia	China
Zhang	ERR589823			Asia	China
Zhang	ERR589824			Asia	China
Zhang	ERR589825			Asia	China
Zhang	ERR589826			Asia	China
Zhang	ERR589827			Asia	China
Zhang	ERR589828			Asia	China
Zhang	ERR589829			Asia	China
Zhang	ERR589830			Asia	China
Zhang	ERR589831			Asia	China
Zhang	ERR589832			Asia	China
Zhang	ERR589833			Asia	China
Zhang	ERR589834			Asia	China
Zhang	ERR589835			Asia	China
Zhang	ERR589836			Asia	China
Zhang	ERR589837			Asia	China
Zhang	ERR589838			Asia	China
Zhang	ERR589839			Asia	China
Zhang	ERR589840			Asia	China
Zhang	ERR589841			Asia	China
Zhang	ERR589842			Asia	China
Zhang	ERR589843			Asia	China
Zhang	ERR589844			Asia	China
Zhang	ERR589845			Asia	China
Zhang	ERR589846			Asia	China
Zhang	ERR589847			Asia	China
Zhang	ERR589848			Asia	China
Zhang	ERR589849			Asia	China
Zhang	ERR589850			Asia	China
Zhang	ERR589851			Asia	China
Zhang	ERR589852			Asia	China
Zhang	ERR589853			Asia	China
Zhang	ERR589854			Asia	China
Zhang	ERR589855			Asia	China
Zhang	ERR589856			Asia	China
Zhang	ERR589857			Asia	China
Zhang	ERR589858			Asia	China
Zhang	ERR589859			Asia	China
Zhang	ERR589860			Asia	China
Zhang	ERR589861			Asia	China
Zhang	ERR589862			Asia	China
Zhang	ERR589863			Asia	China
Zhang	ERR589864			Asia	China
Zhang	ERR589865			Asia	China
Zhang	ERR589866			Asia	China
Zhang	ERR589867			Asia	China
Zhang	ERR589868			Asia	China
Zhang	ERR589869			Asia	China
Zhang	ERR589870			Asia	China
Zhang	ERR589871			Asia	China
Zhang	ERR589872			Asia	China
Zhang	ERR589873			Asia	China
Zhang	ERR589874			Asia	China
Zhang	ERR589875			Asia	China
HMP	SRS011061	F		North America	America		healthy
HMP	SRS011134	M		North America	America		healthy
HMP	SRS011239	F		North America	America		healthy
HMP	SRS011271	M		North America	America		healthy
HMP	SRS011452	M		North America	America		healthy
HMP	SRS011529	M		North America	America		healthy
HMP	SRS011586	F		North America	America		healthy
HMP	SRS012273	F		North America	America		healthy
HMP	SRS012849	M		North America	America		healthy
HMP	SRS012902	F		North America	America		healthy
HMP	SRS013098	F		North America	America		healthy
HMP	SRS013158	M		North America	America		healthy
HMP	SRS013382	M		North America	America		healthy
HMP	SRS013476	M		North America	America		healthy
HMP	SRS013521	F		North America	America		healthy
HMP	SRS013638	M		North America	America		healthy
HMP	SRS013687	M		North America	America		healthy
HMP	SRS013940	M		North America	America		healthy
HMP	SRS014235	M		North America	America		healthy
HMP	SRS014287	M		North America	America		healthy
HMP	SRS014412	F		North America	America		healthy
HMP	SRS014534	F		North America	America		healthy
HMP	SRS014736	F		North America	America		healthy
HMP	SRS014948	M		North America	America		healthy
HMP	SRS014979	F		North America	America		healthy
HMP	SRS015065	F		North America	America		healthy
HMP	SRS015133	F		North America	America		healthy
HMP	SRS015190	F		North America	America		healthy
HMP	SRS015264	M		North America	America		healthy
HMP	SRS015369	F		North America	America		healthy
HMP	SRS015486	F		North America	America		healthy
HMP	SRS015578	M		North America	America		healthy
HMP	SRS015579	F		North America	America		healthy
HMP	SRS015794	M		North America	America		healthy
HMP	SRS015854	M		North America	America		healthy
HMP	SRS015890	M		North America	America		healthy
HMP	SRS015960	M		North America	America		healthy
HMP	SRS016095	F		North America	America		healthy
HMP	SRS016132	F		North America	America		healthy
HMP	SRS016335	M		North America	America		healthy
HMP	SRS016381	M		North America	America		healthy
HMP	SRS016438	M		North America	America		healthy
HMP	SRS016495	F		North America	America		healthy
HMP	SRS016585	F		North America	America		healthy
HMP	SRS016629	F		North America	America		healthy
HMP	SRS016753	M		North America	America		healthy
HMP	SRS016840	M		North America	America		healthy
HMP	SRS016897	M		North America	America		healthy
HMP	SRS016954	M		North America	America		healthy
HMP	SRS017191	M		North America	America		healthy
HMP	SRS017247	M		North America	America		healthy
HMP	SRS017248	M		North America	America		healthy
HMP	SRS017307	M		North America	America		healthy
HMP	SRS017375	M		North America	America		healthy
HMP	SRS017433	F		North America	America		healthy
HMP	SRS017521	F		North America	America		healthy
HMP	SRS017622	M		North America	America		healthy
HMP	SRS017701	F		North America	America		healthy
HMP	SRS017745	M		North America	America		healthy
HMP	SRS017859	M		North America	America		healthy
HMP	SRS017916	M		North America	America		healthy
HMP	SRS018049	M		North America	America		healthy
HMP	SRS018351	M		North America	America		healthy
HMP	SRS018541	F		North America	America		healthy
HMP	SRS018575	M		North America	America		healthy
HMP	SRS018623	M		North America	America		healthy
HMP	SRS018656	F		North America	America		healthy
HMP	SRS018836	F		North America	America		healthy
HMP	SRS019030	M		North America	America		healthy
HMP	SRS019068	M		North America	America		healthy
HMP	SRS019161	M		North America	America		healthy
HMP	SRS019178	M		North America	America		healthy
HMP	SRS019286	F		North America	America		healthy
HMP	SRS019381	F		North America	America		healthy
HMP	SRS019397	M		North America	America		healthy
HMP	SRS019445	M		North America	America		healthy
HMP	SRS019496	F		North America	America		healthy
HMP	SRS019582	M		North America	America		healthy
HMP	SRS019601	F		North America	America		healthy
HMP	SRS019787	M		North America	America		healthy
HMP	SRS019808	F		North America	America		healthy
HMP	SRS019910	M		North America	America		healthy
HMP	SRS019968	F		North America	America		healthy
HMP	SRS020233	M		North America	America		healthy
HMP	SRS020271	M		North America	America		healthy
HMP	SRS020394	M		North America	America		healthy
HMP	SRS020508	M		North America	America		healthy
HMP	SRS020622	M		North America	America		healthy
HMP	SRS020869	M		North America	America		healthy
HMP	SRS021153	F		North America	America		healthy
HMP	SRS021219	F		North America	America		healthy
HMP	SRS021484	M		North America	America		healthy
HMP	SRS021948	F		North America	America		healthy
HMP	SRS022137	F		North America	America		healthy
HMP	SRS022524	F		North America	America		healthy
HMP	SRS023176	M		North America	America		healthy
HMP	SRS023346	F		North America	America		healthy
HMP	SRS023583	F		North America	America		healthy
HMP	SRS023715	M		North America	America		healthy
HMP	SRS024009	F		North America	America		healthy
HMP	SRS024076	M		North America	America		healthy
HMP	SRS024132	M		North America	America		healthy
HMP	SRS024265	F		North America	America		healthy
HMP	SRS024331	M		North America	America		healthy
HMP	SRS024388	F		North America	America		healthy
HMP	SRS024435	M		North America	America		healthy
HMP	SRS024549	M		North America	America		healthy
HMP	SRS024663	M		North America	America		healthy
HMP	SRS042231	M		North America	America		healthy
HMP	SRS042284	F		North America	America		healthy
HMP	SRS042600	F		North America	America		healthy
HMP	SRS042628	M		North America	America		healthy
HMP	SRS042690	M		North America	America		healthy
HMP	SRS042893	F		North America	America		healthy
HMP	SRS042966	F		North America	America		healthy
HMP	SRS043667	M		North America	America		healthy
HMP	SRS044365	M		North America	America		healthy
HMP	SRS044535	M		North America	America		healthy
HMP	SRS044973	M		North America	America		healthy
HMP	SRS045324	F		North America	America		healthy
HMP	SRS045645	M		North America	America		healthy
HMP	SRS045713	M		North America	America		healthy
HMP	SRS045739	M		North America	America		healthy
HMP	SRS045826	F		North America	America		healthy
HMP	SRS045936	M		North America	America		healthy
HMP	SRS045938	M		North America	America		healthy
HMP	SRS046717	M		North America	America		healthy
HMP	SRS046810	M		North America	America		healthy
HMP	SRS047014	M		North America	America		healthy
HMP	SRS047433	F		North America	America		healthy
HMP	SRS048060	F		North America	America		healthy
HMP	SRS048164	M		North America	America		healthy
HMP	SRS048654	F		North America	America		healthy
HMP	SRS048870	F		North America	America		healthy
HMP	SRS048981	M		North America	America		healthy
HMP	SRS049402	F		North America	America		healthy
HMP	SRS049712	M		North America	America		healthy
HMP	SRS049900	M		North America	America		healthy
HMP	SRS049995	F		North America	America		healthy
HMP	SRS050422	M		North America	America		healthy
HMP	SRS050520	F		North America	America		healthy
HMP	SRS050801	M		North America	America		healthy
HMP	SRS051031	M		North America	America		healthy
HMP	SRS051610	F		North America	America		healthy
HMP	SRS051882	F		North America	America		healthy
HMP	SRS052027	M		North America	America		healthy
HMP	SRS052078	M		North America	America		healthy
HMP	SRS052697	F		North America	America		healthy
HMP	SRS053087	F		North America	America		healthy
HMP	SRS053290	F		North America	America		healthy
HMP	SRS053356	M		North America	America		healthy
HMP	SRS053398	F		North America	America		healthy
HMP	SRS053573	M		North America	America		healthy
HMP	SRS053587	M		North America	America		healthy
HMP	SRS054352	M		North America	America		healthy
HMP	SRS054590	F		North America	America		healthy
HMP	SRS054753	F		North America	America		healthy
HMP	SRS054869	M		North America	America		healthy
HMP	SRS054905	F		North America	America		healthy
HMP	SRS055017	M		North America	America		healthy
HMP	SRS055533	M		North America	America		healthy
HMP	SRS055982	F		North America	America		healthy
HMP	SRS056273	M		North America	America		healthy
HMP	SRS057478	F		North America	America		healthy
HMP	SRS057480	F		North America	America		healthy
HMP	SRS057717	F		North America	America		healthy
HMP	SRS058070	M		North America	America		healthy
HMP	SRS058268	M		North America	America		healthy
HMP	SRS058723	F		North America	America		healthy
HMP	SRS058770	M		North America	America		healthy
HMP	SRS062654	F		North America	America		healthy
HMP	SRS062701	F		North America	America		healthy
HMP	SRS062716	F		North America	America		healthy
HMP	SRS063040	F		North America	America		healthy
HMP	SRS063127	M		North America	America		healthy
HMP	SRS063190	F		North America	America		healthy
HMP	SRS063489	F		North America	America		healthy
HMP	SRS063518	F		North America	America		healthy
HMP	SRS063813	M		North America	America		healthy
HMP	SRS063928	F		North America	America		healthy
HMP	SRS063985	F		North America	America		healthy
HMP	SRS064232	F		North America	America		healthy
HMP	SRS064276	F		North America	America		healthy
HMP	SRS064645	M		North America	America		healthy
HMP	SRS064662	F		North America	America		healthy
HMP	SRS064757	F		North America	America		healthy
HMP	SRS064973	M		North America	America		healthy
HMP	SRS065176	F		North America	America		healthy
HMP	SRS065397	F		North America	America		healthy
HMP	SRS074586	F		North America	America		healthy
HMP	SRS074964	M		North America	America		healthy
HMP	SRS075341	M		North America	America		healthy
HMP	SRS075398	F		North America	America		healthy
HMP	SRS075399	F		North America	America		healthy
HMP	SRS075716	F		North America	America		healthy
HMP	SRS075773	M		North America	America		healthy
HMP	SRS075878	F		North America	America		healthy
HMP	SRS075984	F		North America	America		healthy
HMP	SRS076756	M		North America	America		healthy
HMP	SRS076804	F		North America	America		healthy
HMP	SRS076876	M		North America	America		healthy
HMP	SRS076976	M		North America	America		healthy
HMP	SRS077127	F		North America	America		healthy
HMP	SRS077194	F		North America	America		healthy
HMP	SRS077231	M		North America	America		healthy
HMP	SRS077294	M		North America	America		healthy
HMP	SRS077335	F		North America	America		healthy
HMP	SRS077392	F		North America	America		healthy
HMP	SRS077454	M		North America	America		healthy
HMP	SRS077552	M		North America	America		healthy
HMP	SRS077589	M		North America	America		healthy
HMP	SRS077641	F		North America	America		healthy
HMP	SRS077730	F		North America	America		healthy
HMP	SRS077731	F		North America	America		healthy
HMP	SRS077849	M		North America	America		healthy
HMP	SRS077991	M		North America	America		healthy
HMP	SRS078177	F		North America	America		healthy
HMP	SRS078242	F		North America	America		healthy
HMP	SRS078665	F		North America	America		healthy
HMP	SRS097889	F		North America	America		healthy
HMP	SRS097958	M		North America	America		healthy
HMP	SRS098073	F		North America	America		healthy
HMP	SRS098571	F		North America	America		healthy
HMP	SRS098644	F		North America	America		healthy
HMP	SRS098655	F		North America	America		healthy
HMP	SRS098827	F		North America	America		healthy
HMP	SRS098881	M		North America	America		healthy
HMP	SRS100907	F		North America	America		healthy
HMP	SRS101376	M		North America	America		healthy
HMP	SRS104036	M		North America	America		healthy
HMP	SRS104084	F		North America	America		healthy
HMP	SRS1041033	M		North America	America		healthy
HMP	SRS1041037	F		North America	America		healthy
HMP	SRS1041038	F		North America	America		healthy
HMP	SRS1041091	M		North America	America		healthy
HMP	SRS1041092	F		North America	America		healthy
HMP	SRS1041093	F		North America	America		healthy
HMP	SRS1041094	F		North America	America		healthy
HMP	SRS1041095	M		North America	America		healthy
HMP	SRS1041112	M		North America	America		healthy
HMP	SRS1041113	F		North America	America		healthy
HMP	SRS1041118	M		North America	America		healthy
HMP	SRS1041122	M		North America	America		healthy
HMP	SRS1041124	F		North America	America		healthy
HMP	SRS1041134	M		North America	America		healthy
HMP	SRS1041137	M		North America	America		healthy
HMP	SRS1041139	M		North America	America		healthy
HMP	SRS1041140	M		North America	America		healthy
HMP	SRS1041142	F		North America	America		healthy
HMP	SRS1041143	F		North America	America		healthy
HMP	SRS1041144	F		North America	America		healthy
HMP	SRS1041146	M		North America	America		healthy
HMP	SRS1041149	F		North America	America		healthy
HMP	SRS1041157	F		North America	America		healthy
HMP	SRS104197	F		North America	America		healthy
HMP	SRS104327	M		North America	America		healthy
HMP	SRS104400	F		North America	America		healthy
HMP	SRS104636	F		North America	America		healthy
HMP	SRS104975	M		North America	America		healthy
HMP	SRS105082	M		North America	America		healthy
HMP	SRS1054691	F		North America	America		healthy
HMP	SRS1054716	M		North America	America		healthy
HMP	SRS1054928	F		North America	America		healthy
HMP	SRS1054929	M		North America	America		healthy
HMP	SRS1055022	F		North America	America		healthy
HMP	SRS1055034	M		North America	America		healthy
HMP	SRS1055049	F		North America	America		healthy
HMP	SRS1055056	F		North America	America		healthy
HMP	SRS1055067	F		North America	America		healthy
HMP	SRS1055083	F		North America	America		healthy
HMP	SRS1055095	M		North America	America		healthy
HMP	SRS1055099	F		North America	America		healthy
HMP	SRS142505	F		North America	America		healthy
HMP	SRS142599	F		North America	America		healthy
HMP	SRS142923	F		North America	America		healthy
HMP	SRS142980	F		North America	America		healthy
HMP	SRS143070	M		North America	America		healthy
HMP	SRS143085	M		North America	America		healthy
HMP	SRS143148	M		North America	America		healthy
HMP	SRS143181	M		North America	America		healthy
HMP	SRS143342	F		North America	America		healthy
HMP	SRS143372	F		North America	America		healthy
HMP	SRS143417	M		North America	America		healthy
HMP	SRS143466	F		North America	America		healthy
HMP	SRS143598	F		North America	America		healthy
HMP	SRS143991	M		North America	America		healthy
HMP	SRS144135	M		North America	America		healthy
HMP	SRS144183	F		North America	America		healthy
HMP	SRS144297	M		North America	America		healthy
HMP	SRS144362	M		North America	America		healthy
HMP	SRS144506	M		North America	America		healthy
HMP	SRS144537	M		North America	America		healthy
HMP	SRS144603	F		North America	America		healthy
HMP	SRS145308	M		North America	America		healthy
HMP	SRS145497	F		North America	America		healthy
HMP	SRS146888	F		North America	America		healthy
HMP	SRS147022	M		North America	America		healthy
HMP	SRS147039	M		North America	America		healthy
HMP	SRS147088	M		North America	America		healthy
HMP	SRS147272	F		North America	America		healthy
HMP	SRS147377	M		North America	America		healthy
HMP	SRS147425	F		North America	America		healthy
HMP	SRS147614	F		North America	America		healthy
HMP	SRS147766	F		North America	America		healthy
HMP	SRS147919	F		North America	America		healthy
HMP	SRS147977	F		North America	America		healthy
HMP	SRS148091	M		North America	America		healthy
HMP	SRS148196	F		North America	America		healthy
HMP	SRS148319	F		North America	America		healthy
HMP	SRS148511	F		North America	America		healthy
HMP	SRS148721	M		North America	America		healthy
HMP	SRS148784	M		North America	America		healthy
HMP	SRS148817	F		North America	America		healthy
HMP	SRS148874	M		North America	America		healthy
HMP	SRS148970	M		North America	America		healthy
HMP	SRS149075	F		North America	America		healthy
HMP	SRS149181	M		North America	America		healthy
HMP	SRS149244	M		North America	America		healthy
HMP	SRS149325	F		North America	America		healthy
HMP	SRS149784	F		North America	America		healthy
HMP	SRS149879	F		North America	America		healthy
HMP	SRS150029	M		North America	America		healthy
HMP	SRS886701	F		North America	America		healthy
HMP	SRS892882	F		North America	America		healthy
HMP	SRS893009	F		North America	America		healthy
HMP	SRS893170	F		North America	America		healthy
HMP	SRS893187	F		North America	America		healthy
HMP	SRS893230	F		North America	America		healthy
HMP	SRS893231	F		North America	America		healthy
HMP	SRS893252	M		North America	America		healthy
HMP	SRS893253	F		North America	America		healthy
HMP	SRS893259	M		North America	America		healthy
HMP	SRS893279	M		North America	America		healthy
HMP	SRS893285	F		North America	America		healthy
HMP	SRS893295	M		North America	America		healthy
HMP	SRS893300	M		North America	America		healthy
HMP	SRS893327	M		North America	America		healthy
HMP	SRS893342	F		North America	America		healthy
HMP	SRS893366	F		North America	America		healthy
HMP	SRS893369	F		North America	America		healthy
HMP	SRS893378	F		North America	America		healthy
HMP	SRS893380	M		North America	America		healthy
HMP	SRS893382	M		North America	America		healthy
HMP	SRS971276	F		North America	America		healthy

## Sheet: b. Relative Abundance (Species)
Batch	Sample	Gender	Lifestyle	Continent	Country	Age	Health_status	BMI	BMI1	others	others	others	others	Methanobacterium formicicum	Methanobacterium sp000499765	Methanobrevibacter olleyae	Methanobrevibacter ruminantium	Methanobrevibacter sp900321995	Methanobrevibacter_A gottschalkii	Methanobrevibacter_A millerae	Methanobrevibacter_A oralis	Methanobrevibacter_A smithii	Methanobrevibacter_A smithii_A	Methanobrevibacter_A sp001548675	Methanobrevibacter_A sp002496065	Methanobrevibacter_A sp900313645	Methanobrevibacter_A sp900314615	Methanobrevibacter_A sp900314695	Methanobrevibacter_A sp900319535	Methanobrevibacter_A sp900320955	Methanobrevibacter_A thaueri	Methanobrevibacter_A woesei	others	others	others	others	Methanosphaera sp001729965	Methanosphaera sp002509095	Methanosphaera sp900322125	Methanosphaera stadtmanae	others	Methanomassiliicoccaceae DTU008 sp001512965	Methanomassiliicoccus intestinalis	Methanomassiliicoccus luminyensis	Methanomassiliicoccus_A intestinalis	Methanomethylophilaceae ISO4-G1 sp001563305	Methanomethylophilaceae ISO4-G1 sp002506175	Methanomethylophilus alvus	Methanomethylophilus sp000350305
twins	35365	F		Europe	UK	61.9521		38.3537	obesity	0	0	0	0	0	0	0	0	0	0	0	0	0.000157737	0	0	0	0	0	0	0	0	0	0	0	0	0	0	0	0	0	0	0	0	0	0	0	0.0202593	0	0	0
twins	35366	F		Europe	UK	61.9521		40.9878	obesity	0	0	0	0	0	0	0	0	0	0	0	0	0.000260929	0	0	0	0	0	0	0	0	0	0	0	0	0	0	0	0	0	0	0	0	0	0	0	0.0271259	0	0	0
twins	35387	F		Europe	UK	49.8919		19.6889	normal	0.00129007	0	0	0	0	0.000294137	0	0	0	0.000464426	0.000199375	0.000290266	0.000302586	0.000282724	0.000368592	0	0	0	0	0.000967555	0	0	0.000451526	0	0	0.000967555	0	0.000499903	0.000461449	0.00022611	0.000218214	0	0.00122557	0.000202541	0	0.000478402	0.001153	0.000302671	0.00030573	0
twins	35388	F		Europe	UK	49.8919		24.7136	normal	0	0	0	0	0	0.000829234	0	0	0	0	0	0	0.000263884	6.37567e-05	0	0	0	0	0	0	0	0	0	0	0	0	0	0	0	0	0.000160733	0	0	0.000196767	0	0	0.0169829	0	0.000168465	0
twins	35389	F		Europe	UK	64.7967		20.4825	normal	0	0	0	0	0	0	0	0	0	0	0	0	0	0	0	0	0	0	0	0	0	0	0	0	0	0	0	0	0	0	0	0	0	0	0	0	0.0381806	0	0	0
twins	35390	F		Europe	UK	64.7967		20.538	normal	0	0	0	0	0	0	0	0	0	0	0	0	0	0	0	0	0	0	0	0	0	0	0	0	0	0	0	0	0	0	0	0	0	0	0	0	0	0	0	0
twins	35391	F		Europe	UK	65.4538		21.4232	normal	0	0	0	0	0	0	0	0	0	0	0	0	0.000500369	0.000132932	0	0	0	0	0	0	0	0	0	0	0	0	0	0	0	0.00129978	0	0	0	0	0	0	0	0	0	0
twins	35392	F		Europe	UK	65.4538		27.526	overweight	0	0	0	0	0	0	0	0	0	0	0.00438116	0	0.0002052	0	0	0	0	0	0	0	0	0	0	0	0	0	0	0	0	0	0	0	0	0	0	0	0.00903614	0	0.00132035	0
twins	35505	F		Europe	UK	42.1273		22.4284	normal	0	0	0	0	0	0	0	0	0	0.00163522	0	0	0.00031217	0.000207953	0	0	0	0	0	0	0	0	0	0	0	0	0	0	0	0.000162305	0	0	0.0264151	0	0	0	0.00550314	0	0.00013354	0
twins	35506	F		Europe	UK	42.1273		21.5744	normal	0	0	0	0	0	0.000190616	0	0	0	0	0.00193282	0	0.000341893	2.51277e-05	0	0	0	0	0	0	0	0	0	0	0	0	0	0	0	0	5.45954e-05	0	0	0.000131965	0	0	0.00458211	0.0011843	0.000130559	0
twins	35511	F		Europe	UK	66.6338		24.1097	normal	0	0	0	0	0	0	0	0	0	0	0	0	0.000675858	0	0	0	0	0	0	0	0	0	0	0	0	0	0	0	0	0	0	0	0	0	0	0	0	0	0	0
twins	35512	F		Europe	UK	66.6338		27.7728	overweight	0	0	0	0	0	0	0	0	0	0	0	0	0.00049581	0	0	0	0	0	0	0	0	0	0	0	0	0	0	0	0	0	0	0	0	0	0	0	0.010448	0	0.000147703	0
twins	35515	F		Europe	UK	56.1424		29.3786	overweight	0	0.00312012	0	0	0	0.000276911	0.00117005	0	0	0	0	0	0.000311253	0.000255555	0.000585023	0	0	0	0	0	0	0	0	0	0	0	0	0	0	0.000218073	0.000231312	0	0	0.000344514	0	0.000568773	0.000308762	0	0.000373988	0.000455018
twins	35516	F		Europe	UK	56.1424		31.6367	obesity	0	0	0	0	0	0	0	0	0	0	0	0	0.000453562	0	0	0	0	0	0	0	0	0	0	0	0	0	0	0	0	0	0	0	0	0	0	0	0	0	0	0
twins	35519	F		Europe	UK	72.0465		31.8402	obesity	0	0	0	0	0	0	0	0	0	0	0	0	0.000242702	0.000418979	0	0	0	0	0	0	0	0	0	0	0	0	0	0	0	0	8.84314e-05	0	0	0.000166251	0	0	0.00450263	0	0	0
twins	35520	F		Europe	UK	72.0493		21.8426	normal	0	0	0	0	0	0	0	0	0	0.00246103	0	0	0.000311372	0.000287782	0	0	0	0	0	0	0	0	0	0	0	0	0	0	0	0	0	0	0	0	0	0.00129888	0.00410172	0	0	0
twins	35523	F		Europe	UK	52.9665		25.7202	overweight	0	0	0	0	0	0.000553532	0	0	0	0	0	0	0.000395178	5.13944e-05	0	0	0	0	0	0	0	0	0	0	0	0	0	0	0.00128859	0.00025844	0.00013172	0	0	0.000160233	0	0	0.00971109	0	0.000134692	0
twins	35524	F		Europe	UK	52.9665		23.7741	normal	0	0	0	0	0	0	0	0	0	0	0	0	0.000620788	0	0	0	0	0	0	0	0	0	0	0	0	0	0	0	0	0	0	0	0	0	0	0	0	0	0	0
twins	35541	F		Europe	UK	49.1253		27.0312	overweight	0	0	0	0	0	0	0	0	0	0	0	0	9.1034e-05	0	0	0	0	0	0	0	0	0	0	0	0	0	0	0	0	0	0	0	0	0	0	0	0.0272109	0	0	0
twins	35542	F		Europe	UK	49.1253		26.3781	overweight	0	0	0	0	0	0	0	0	0	0	0	0	0.000473101	0.000546035	0	0	0	0	0	0	0	0	0	0	0	0	0	0	0	0	0	0	0	0	0	0	0	0	0.000570776	0
twins	35549	F		Europe	UK	72.7036		24.5906	normal	0	0	0	0.00429185	0	0.000141631	0	0	0	0.000729614	0	0.000608011	0.000291344	0.000207237	0	0	0	0	0	0	0	0	0	0	0	0	0.00472103	0	0	4.1534e-05	0.000227148	0	0	0.000270386	0	0.00026824	0.003201	0	0.000286613	0
twins	35550	F		Europe	UK	72.7036		25.0858	overweight	0	0	0	0	0	0	0	0	0	0	0	0	0.000434507	0	0	0	0	0	0	0	0	0	0	0	0	0	0	0.00656109	0	0	0	0	0	0	0	0	0.0135747	0	0.000216947	0
twins	35551	F		Europe	UK	60.8104		22.7011	normal	0	0	0	0	0	0	0	0	0	0	0	0	0.000175691	0	0	0	0	0	0	0	0	0	0	0	0	0	0	0	0	0	0	0	0	0	0	0	0.0326406	0	0	0
twins	35552	F		Europe	UK	60.8104		20.4688	normal	0	0	0	0	0	0	0	0	0	0	0	0	0.000371229	0	0	0	0	0	0	0	0	0	0	0	0	0	0	0	0	0	0	0	0	0	0	0	0.0115403	0	0	0
twins	35561	F		Europe	UK	68.2847		23.2466	normal	0	0	0	0	0	0.000299921	0	0	0.00710339	0	0	0	0.000314298	0.000170265	0	0	0	0.00210471	0	0	0	0	0	0	0	0	0	0	0	0.000670452	0.000111953	0	0	0.000350785	0	0	0	0	0.000205425	0
twins	35562	F		Europe	UK	68.2847		25.4543	overweight	0	0	0	0	0	0.000303575	0	0	0	0.000679049	0	0	0.000218672	0.000258912	0	0	0	0	0	0	0	0	0	0	0	0	0	0.000699021	0.000291899	0.000242671	0.000134917	0	0.00279609	0.000183743	0	0	0.00158112	0	0.000303684	0.000632448
twins	35563	F		Europe	UK	61.347		44.8285	obesity	0	0	0	0	0	0.000464079	0	0	0	0.0011602	0	0	0.000263467	0.000324776	0	0.00282612	0	0	0	0	0	0	0	0	0	0	0	0	0.00171627	0.00034067	0.000123425	0	0.0142793	0.000490852	0	0	0.002603	0	0.000128367	0
twins	35564	F		Europe	UK	61.347		35.371	obesity	0	0	0	0	0	0	0	0	0	0	0	0	0.000201466	0	0	0	0	0	0	0	0	0	0	0	0	0	0	0	0	0	0	0	0	0	0	0	0.0270701	0	0	0
twins	35577	F		Europe	UK	59.4689		38.0469	obesity	0	0	0	0	0	0	0	0	0	0	0	0	0.000666919	0	0	0	0	0	0	0	0	0	0	0	0	0	0	0	0	0	0	0	0	0	0	0	0.00622963	0	0	0
twins	35578	F		Europe	UK	59.4689		31.7982	obesity	0	0	0	0	0	0	0	0	0	0	0	0	0.000650062	0	0	0	0	0	0	0	0	0	0	0	0	0	0	0	0	0	0	0	0	0	0	0	0	0	0.000392136	0
twins	35583	F		Europe	UK	59.5838		27.3413	overweight	0	0	0	0	0	0	0	0	0	0	0	0	0.000219966	0	0	0	0	0	0	0	0	0	0	0	0	0	0	0	0	0	0	0	0	0	0	0	0.0153752	0	0	0
twins	35629	F		Europe	UK	63.1677		33.0837	obesity	0	0	0	0	0	0	0	0	0	0	0	0	0.000290518	0	0	0	0	0	0	0	0	0	0	0	0	0	0	0	0	0	0	0	0	0	0	0	0.0220054	0	0.000353868	0
twins	35630	F		Europe	UK	63.1677		23.594	normal	0	0	0	0	0	0	0	0	0	0	0	0	0.000132779	6.93087e-05	0	0	0	0	0	0	0	0	0	0	0	0	0	0	0	0	0	0	0.0442478	9.7572e-05	0	0	0.021273	0	0	0
twins	35635	F		Europe	UK	66.0178		22.6989	normal	0	0	0	0	0	0	0	0	0	0	0	0	0.000383939	0	0	0	0	0	0	0	0	0	0	0	0	0	0	0	0	0	0	0	0	0	0	0	0.0176216	0	0.000523276	0
twins	35636	F		Europe	UK	66.0178		22.7794	normal	0	0	0	0	0	0	0	0	0	0	0	0	0.000528541	0	0	0	0	0	0	0	0	0	0	0	0	0	0	0	0	0	0	0	0	0	0	0	0.0129933	0	0	0
twins	35653	F		Europe	UK	54.0507		21.7873	normal	0	0	0	0	0	0	0	0	0	0	0	0	2.74925e-05	0.000768863	0	0	0	0	0	0	0	0	0	0	0	0	0	0	0	0	0	0	0	0	0	0	0.00635593	0	0	0
twins	35654	F		Europe	UK	54.0507		24.9258	overweight	0.00105891	0	0	0	0	0.000377863	0	0	0	0.000479296	0.000121597	0.000241506	0.000237076	0.000347089	0.00046178	0	0	0	0	0.000538743	0	0	0.000575898	0	0	0.000947445	0	0.000459789	0.000214354	0.00037754	0.000253462	0	0.000780249	0.000232588	0	0.000148619	0.000645563	0.000171483	0.000277515	0.000269372
twins	35657	F		Europe	UK	72.8159		28.3654	overweight	0	0	0	0	0	0	0	0	0	0	0	0	0.000152815	0	0	0	0	0	0	0	0	0	0	0	0	0	0	0	0	0	0	0	0	0	0	0	0.0289474	0	0	0
twins	35658	F		Europe	UK	72.8159		27.9567	overweight	0	0	0	0	0	0	0	0	0	0	0	0	0.000295346	0	0	0	0	0	0	0	0	0	0	0	0	0	0	0	0	0	0	0	0	0	0	0	0	0	0.00435506	0
twins	35665	F		Europe	UK	64.3094		25.0102	overweight	0	0	0	0	0	0	0	0	0	0	0	0	0.000184412	0.000251418	0	0.0018073	0	0	0	0	0	0	0	0	0	0	0	0	0	0.0001166	0	0	0	4.97007e-05	0	0	0.00649497	0	7.42725e-05	0
twins	35666	F		Europe	UK	64.3094		24.4031	normal	0	0	0	0	0	0	0	0	0	0	0	0	0.000183855	0	0	0	0	0	0	0	0	0	0	0	0	0	0	0	0	0	0	0	0	0	0	0	0.0184004	0	0	0
twins	35697	F		Europe	UK	69.2868		22.7638	normal	0	0	0	0	0	0.000531697	0	0	0	0	0	0	0.00058215	0	0	0	0	0	0	0	0	0	0	0	0	0	0	0	0	0	0	0	0	0	0	0	0.0043456	0	0	0
twins	35698	F		Europe	UK	69.2868		22.3453	normal	0	0	0	0	0	0	0	0	0	0	0	0	0.000439644	0	0	0	0	0	0	0	0	0	0	0	0	0	0	0	0	0	0	0	0	0	0	0	0.0135747	0	0	0
twins	35703	F		Europe	UK	62.8638		22.5231	normal	0	0	0	0	0	0	0	0	0	0	0	0	0.000136336	0	0	0	0	0	0	0	0	0	0	0	0	0	0	0	0	0	0	0	0	0	0	0	0.034167	0	0	0
twins	35704	F		Europe	UK	62.8638		22.6049	normal	0	0	0	0	0	0	0	0	0	0	0	0	0	0	0	0	0	0	0	0	0	0	0	0	0	0	0	0	0	0	0	0	0	0	0	0	0	0	0	0
twins	35705	F		Europe	UK	68.2108		31.6753	obesity	0	0	0	0	0	0	0	0	0	0	0	0	0.000361615	0	0	0	0	0	0	0	0	0	0	0	0	0	0	0	0	0	0	0	0	0	0	0	0.0198777	0	0	0
twins	35706	F		Europe	UK	68.2108		26.2864	overweight	0	0	0	0	0	0	0	0	0	0	0	0	0.000779121	0	0	0	0	0	0	0	0	0	0	0	0	0	0	0	0	0	0	0	0	0	0	0	0	0	0	0
twins	35707	F		Europe	UK	68.8953		19.1344	normal	0	0	0	0	0	0.000133389	0	0	0	0	0.000303157	0.000486314	0.000437463	0.000172283	0	0	0	0	0	0.000903154	0	0	0	0	0.00250104	0	0	0	0	6.49912e-05	0.000227267	0	0	0.000122273	0	0	0.00298736	0.000240485	0.000137043	0
twins	35708	F		Europe	UK	68.8953		20.484	normal	0	0	0	0	0	0	0	0	0	0	0	0	0.000381661	0	0	0	0	0	0	0	0	0	0	0	0	0	0	0	0	0	0	0	0	0	0	0	0.0134804	0	0	0
twins	35712	F		Europe	UK	64.0329		35.9551	obesity	0	0	0	0	0	0	0	0	0	0	0	0	0.000180938	0	0	0	0	0	0	0	0	0	0	0	0	0	0	0	0	0	0	0	0	0	0	0	0.00721785	0	0	0
twins	35723	F		Europe	UK	63.9808		24.2559	normal	0	0	0	0	0	0	0	0	0	0	0	0	0.000187922	0	0	0	0	0	0	0	0	0	0	0	0	0	0	0	0	0	0	0	0	0	0	0	0.0166957	0	0	0
twins	35724	F		Europe	UK	63.9808		23.3479	normal	0	0	0	0	0	0	0	0	0	0	0	0	0.000347584	0	0	0	0	0	0	0	0	0	0	0	0	0	0	0	0	0	0	0	0	0	0	0	0.0238095	0	0	0
twins	35733	F		Europe	UK	68.1862		24.0735	normal	0	0	0	0	0	0	0	0	0	0	0	0	0.00054184	0	0	0	0	0	0	0	0	0	0	0	0	0	0	0	0	0	0	0	0	0	0	0	0.00817691	0	0	0
twins	35734	F		Europe	UK	68.1862		25.094	overweight	0	0	0	0	0	0	0	0	0	0	0	0	0.000137075	0	0	0	0	0	0	0	0	0	0	0	0	0	0	0	0	0	0.000166484	0	0	0.000135629	0	0	0.0189098	0	0	0
twins	35739	F		Europe	UK	67.8029		19.9148	normal	0	0	0	0	0	0	0	0	0	0	0.00177817	0	8.98941e-05	0	0	0	0	0	0	0	0	0	0	0	0	0	0	0	0	0	0	0	0	0	0	0	0.0217332	0	7.25681e-05	0
twins	35740	F		Europe	UK	67.8029		24.8748	normal	0	0	0	0	0	0	0	0	0	0	0	0	0.000379342	0	0	0	0	0	0	0	0	0	0	0	0	0	0	0	0	0	0	0	0	8.49934e-05	0	0	0.0112882	0	0.0011461	0
twins	35741	F		Europe	UK	47.6386		20.4949	normal	0	0	0	0	0	0.000705882	0	0	0	0	0	0	0.000169839	5.6926e-05	0	0	0	0	0	0	0	0	0	0	0	0	0	0	0	0	0.000738423	0	0	0.000172549	0	0	0.0156863	0	0.000290089	0
twins	35742	F		Europe	UK	47.6413		24.406	normal	0	0	0	0	0	0	0	0	0	0	0	0	0.000324113	0	0	0	0	0	0	0	0	0	0	0	0	0	0	0	0	0	0	0	0	0	0	0	0.0107428	0	0.00111002	0
twins	35837	F		Europe	UK	64.6626		21.1427	normal	0	0	0	0	0	0	0	0	0	0	0	0	0.000300096	0	0	0	0	0	0	0	0	0	0	0	0	0	0	0	0	0	0	0	0	0	0	0	0.019766	0	0	0
twins	35838	F		Europe	UK	64.6626				0	0	0	0	0	0	0	0	0	0	0	0	0.000586386	0	0	0	0	0	0	0	0	0	0	0	0	0	0	0	0	0	0	0	0	0	0	0	0.00789206	0	0	0
twins	35979	F		Europe	UK	54.037		21.3149	normal	0	0	0	0.00840336	0	0.000180995	0	0	0	0.00180995	0	0	0.000307741	0.000181152	0	0	0	0	0	0	0	0	0	0	0	0	0	0	0	0	0.000264754	0	0	0.000163758	0	0.000754148	0.00070028	0	0.000177099	0
twins	35980	F		Europe	UK	54.037		23.2708	normal	0	0	0	0	0	0	0	0	0	0	0	0	0.000254117	0.000527106	0	0	0	0	0	0	0	0	0	0	0	0	0	0	0	0	0	0	0	0	0	0	0.0127162	0	0	0
twins	35989	F		Europe	UK	50.4066		25.5228	overweight	0	0	0	0	0	0.000365374	0	0	0	0.000899382	0.000332158	0	0.000278093	0.000186427	0	0	0	0	0	0	0	0	0	0	0	0	0	0.000913435	0.000410775	0.000190393	0.000231722	0	0.00365374	0.000500281	0	0	0.000737774	0	0.000142453	0
twins	35990	F		Europe	UK	50.4066		21.014	normal	0	0	0	0	0	0.000335657	0	0	0	0.000877872	0	0	0.000326883	0.000168141	0.000627052	0.00206558	0	0	0	0	0	0	0	0	0	0	0	0	0.000337643	0.000316501	0.000344722	0	0.00361477	0.000237542	0	0	0.00107582	0	0.000351927	0
twins	35991	F		Europe	UK	57.4155		23.6488	normal	0	0	0	0	0	0	0	0	0	0	0	0	0.000359493	0	0	0	0	0	0	0	0	0	0	0	0	0	0	0	0	0	0	0	0	0	0	0	0.0231977	0	0	0
twins	35992	F		Europe	UK	57.4155		23.6634	normal	0	0	0	0	0	0.000313796	0	0.000449708	0.000424724	0.000209864	9.085e-05	0.00019987	0.000274761	0.000271094	0.00027839	0.000666234	0	0	0	0.000316461	0	0	0	0	0	0.00099935	0	0.000524659	0.000299805	0.000284224	0.000395753	0	0.000699545	0.000328786	0	0.000195706	0.000233182	0.000146059	0.000187207	0
twins	35999	F		Europe	UK	55.9836		27.4976	overweight	0	0	0	0	0	0.000292137	0	0.000699729	0.00131199	0.000349864	0.000166981	0	0.000285098	0.000233654	0.00038735	0.000495641	0	0	0	0	0	0.000332371	0	0	0	0.00157439	0	0.000655996	0.00025567	0.000282149	0.000367544	0	0.00148692	0.000273477	0	0.000247821	0.00041182	0.000201845	0.000258205	0.000481064
twins	36000	F		Europe	UK	55.9836		27.7927	overweight	0	0	0	0	0.00801043	8.94188e-05	0	0	0	0.00052161	0	0	0.000339641	0.000130703	0	0.00117983	0	0.00291853	0	0	0	0	0	0	0	0	0	0	0.00143299	0.0003866	0.000269525	0	0	0.000187531	0	0	0.00217337	0	0.000116112	0
twins	36005	F		Europe	UK	73.4456		20.8466	normal	0	0	0	0	0	7.43707e-05	0	0	0	0.000858124	0.00109216	0	0.000279778	0.000228948	0	0	0	0	0	0	0	0	0	0	0	0	0	0	0.000748108	0.000212224	0.000194751	0	0	0.000343249	0	0.000619756	0.00166857	0.000242035	0.000327184	0.000762777
twins	36006	F		Europe	UK	73.4456		21.6511	normal	0	0	0	0	0	0	0	0	0	0	0	0.0014928	0.000374749	0.000143402	0	0	0	0	0	0	0	0	0	0	0	0	0	0	0	0.000164293	9.52851e-05	0	0	8.42993e-05	0	0	0.00395153	0	0.000490783	0
twins	36007	F		Europe	UK	50.5462		23.9438	normal	0	0	0	0	0	0	0	0	0	0	0	0	0.000679634	0	0	0	0	0	0	0	0	0	0	0	0	0	0	0	0	0	0	0	0	0	0	0	0	0	0	0
twins	36008	F		Europe	UK	50.5462		22.486	normal	0	0	0.00492454	0	0	0.000196982	0	0	0	0.000953137	0.00049101	0.000794281	0.000248012	0.000146045	0.000862362	0	0	0	0	0	0	0	0.00169447	0	0	0	0	0.00111199	0	0.000145191	0.000171531	0	0	0.000202277	0	0	0.00659253	0	0.000218699	0
twins	36011	F		Europe	UK	70.7652		23.8711	normal	0	0	0	0	0	0	0	0	0	0	0	0	0.000754458	0	0	0	0	0	0	0	0	0	0	0	0	0	0	0	0	0	0	0	0	6.17284e-05	0	0	0	0	0	0
twins	36012	F		Europe	UK	70.7652		23.3306	normal	0.000730674	0	0	0	0.000365337	0.000287398	0	0.0010473	0.000389693	0.000224073	0.000163848	0	0.000295983	0.000234228	0.000361857	0	0.000389693	0	0	0.000276032	0	0	0	0	0	0.000974232	0	0.000487116	0.000487116	0.000262414	0.000250035	0	0.000633251	0.000287723	0	0.000182668	0.000986409	0.000209834	0.000277589	0.000340981
twins	36019	F		Europe	UK	69.5222		28.3266	overweight	0	0	0	0	0	0	0	0	0	0	0	0	0.000753612	0	0	0	0	0	0	0	0	0	0	0	0	0	0	0	0	0	0	0	0	0	0	0	0	0	0	0
twins	36020	F		Europe	UK	69.5222		21.3001	normal	0	0	0	0	0	0	0	0	0	0	0	0	0.000279666	0	0	0	0	0	0	0	0	0	0	0	0	0	0	0	0	0	0	0	0	0	0	0	0.0169801	0	0.000794435	0
twins	36033	F		Europe	UK	68.5257		18.2531	underweight	0	0	0	0	0	0.000988417	0	0	0	0	0	0	0.000420233	8.7184e-05	0	0	0	0	0	0	0	0	0	0	0	0	0	0	0	0.000232491	0.000205373	0	0	0.000267696	0	0	0.00353925	0	0.000200984	0
twins	36034	F		Europe	UK	68.5257		22.9375	normal	0	0	0	0	0	0	0	0	0	0	0	0	7.54921e-05	0.000585819	0	0	0	0	0	0	0	0	0	0	0	0	0	0	0	0	0	0	0	0	0	0	0.0131027	0	0	0
twins	36049	F		Europe	UK	70.3819		26.3656	overweight	0	0	0	0.00598527	0	0.000110497	0	0	0	0.00128913	0	0	0.000364441	0.000202355	0	0	0	0	0	0	0	0	0	0	0	0	0	0	0	0	0.000217958	0	0	0.000128913	0	0.000460405	0.00512201	0	0.000242816	0
twins	36050	F		Europe	UK	70.3819		22.3069	normal	0	0	0	0	0	0	0	0	0	0	0	0	0.000143595	0	0	0	0	0	0	0	0	0	0	0	0	0	0	0	0	0	0.000115748	0	0	0	0	0	0.0222552	0	0.00138206	0
twins	36051	F		Europe	UK	60.9911		22.8329	normal	0	0	0	0	0	0.000595238	0	0	0	0	0	0	0.000279309	0.000289733	0	0	0	0	0	0	0	0	0	0	0	0	0	0	0	0	0.000153785	0	0	0.000181406	0	0	0.00956633	0	0.000180552	0
twins	36052	F		Europe	UK	60.9911		23.4768	normal	0	0	0	0	0	0	0	0	0	0	0	0	2.50576e-05	0	0	0	0	0	0	0	0	0	0	0	0	0	0	0	0	0	0	0	0	0	0	0	0.0343289	0	0	0
twins	36055	F		Europe	UK	41.5551		23.9158	normal	0.0010128	0	0	0	0.000364609	0.000350835	0	0	0.000344353	0.000534759	0.000154682	0.00111408	0.00028066	0.000260306	0.000295159	0.000297089	0	0	0	0.00083725	0	0	0.000486145	0	0	0.000729217	0	0.000668449	0.00017763	0.000252656	0.000262036	0	0.000769729	0.000232269	0	0.000600929	0.000231256	0.000158932	0.000280532	0.000114784
twins	36056	F		Europe	UK	41.5551		23.193	normal	0	0	0	0	0	0	0	0	0	0	0	0	0.000473715	5.04032e-05	0	0	0	0	0	0	0	0	0	0	0	0	0	0	0	0	0	0	0	0.000287879	0	0	0.00700758	0	0	0
twins	36057	F		Europe	UK	69.0678		31.5214	obesity	0	0	0	0	0	0	0	0	0	0	0	0	0.000265976	2.19853e-05	0	0	0	0	0	0	0	0	0	0	0	0	0	0	0	0	5.58554e-05	0	0	6.73129e-05	0	0	0.00639472	0	0	0
twins	36058	F		Europe	UK	69.065		27.9367	overweight	0	0	0	0.00306848	0	0.000197028	0	0	0	0.000613695	0	0.000538329	0.000288157	0.000249411	0	0	0	0.000511413	0	0	0	0	0	0	0	0	0.00355297	0	0	0.000109402	0.000268878	0	0	0.000288544	0.00177649	0.000242248	0.00269165	0.00024846	0.000245567	0
twins	36116	F		Europe	UK	55.896		33.7857	obesity	0	0	0	0	0	0.000356253	0	0	0	0.000423518	0	0.00031141	0.000271859	0.00030488	0.000373692	0	0	0.000332171	0	0.000788905	0	0	0	0	0.00286497	0	0	0.00127678	0	0.000166085	0.000313398	0	0	0.000397774	0	0	0.000389263	0.000220383	0.000206469	0.000394453
twins	36117	F		Europe	UK	55.896		35.9903	obesity	0	0	0	0	0	0	0	0	0	0	0	0	0.000689376	0	0	0	0	0	0	0	0	0	0	0	0	0	0	0	0	0	0	0	0	0	0	0	0	0	0	0
twins	36118	F		Europe	UK	77.1745		22.2804	normal	0	0	0	0	0	0	0	0	0	0	0	0	0.000204388	0	0	0	0	0	0	0	0	0	0	0	0	0	0	0	0	0	0	0	0	0	0	0	0.0223414	0	0	0
twins	36119	F		Europe	UK	77.1745		20.0163	normal	0	0	0	0	0	0	0	0	0	0	0	0	0.000623589	0.000211222	0	0	0	0	0	0	0	0	0	0	0	0	0	0	0	0	0	0	0	0	0	0	0	0	0.000129349	0
twins	36157	F		Europe	UK	79.666		30.0358	obesity	0	0	0	0	0	0	0	0	0	0	0	0	7.63386e-05	0	0	0	0	0	0	0	0	0	0	0	0	0	0	0	0	0	0	0	0	0	0	0	0.0361593	0	0	0
twins	36158	F		Europe	UK	79.666		27.2874	overweight	0	0	0	0	0	0	0	0	0	0	0	0	2.87211e-05	0	0	0	0	0	0	0	0	0	0	0	0	0	0	0	0	0	0	0	0	0	0	0	0.0386453	0	0	0
twins	36211	F		Europe	UK	62.5955		23.1795	normal	0	0	0	0	0	0	0	0	0	0	0.0050101	0	0.000132648	3.58423e-05	0	0	0	0	0	0	0	0	0	0	0	0	0	0	0	0	0	0	0	0	0	0	0.0233333	0	0.000255708	0
twins	36212	F		Europe	UK	62.5955		20.2113	normal	0	0	0	0	0	0	0	0	0	0	0	0	9.16418e-05	4.55622e-05	0	0	0	0	0	0	0	0	0	0	0	0	0	0	0	0	0	0	0	0	0	0	0.0216573	0	0	0
twins	36243	F		Europe	UK	76.3313		32.0141	obesity	0	0	0	0	0	0	0	0	0	0	0	0	0.000181104	0	0	0	0	0	0	0	0	0	0	0	0	0	0	0	0	0	0	0	0	0	0	0	0.0210356	0	0	0
twins	36244	F		Europe	UK	76.3313		22.9488	normal	0	0	0	0	0	0.00035057	0	0	0	0.000575936	0	0.000354743	0.000259343	0.000301649	0.000321952	0	0	0	0	0.00083469	0	0	0.000667752	0	0	0	0	0	0.000125203	0.00015886	0.000247743	0	0.00150244	0.000289637	0	0.000573849	0.000751221	0.000385241	0.00034045	0
twins	36389	F		Europe	UK	60.9774		31.3472	obesity	0	0	0	0	0	0	0	0	0	0	0	0	0.000366895	0	0	0	0	0	0	0	0	0	0	0	0	0	0	0	0	0	0	0	0	0	0	0	0.00669643	0	0	0
twins	36390	F		Europe	UK	60.9774		25.3411	overweight	0	0	0	0	0	0	0	0	0	0	0	0	0.000269872	0	0	0	0	0	0	0	0	0	0	0	0	0	0	0	0	0	0.00199236	0	0	0	0	0	0.00399245	0	0	0
twins	36439	F		Europe	UK	71.729		28.7891	overweight	0	0	0	0	0	0	0	0	0	0	0	0	0.000327839	0.000354952	0	0	0	0	0	0	0	0	0	0	0	0	0	0	0.0010112	7.57232e-05	5.74368e-05	0	0.0389671	7.82473e-05	0	0	0.00606416	0	0.000173645	0
twins	36440	F		Europe	UK	71.729		27.7686	overweight	0	0	0	0	0	0	0	0	0	0	0	0	0.000550865	0	0	0	0	0	0	0	0	0	0	0	0	0	0	0	0	0	0	0	0	0	0	0	0.0119227	0	0	0
twins	36453	F		Europe	UK	59.729		26.0586	overweight	0	0	0	0	0	0	0	0	0	0	0	0	0.000406166	0	0	0	0	0	0	0	0	0	0	0	0	0	0	0	0	0	0	0	0	0	0	0	0.0147138	0	0	0
twins	36454	F		Europe	UK	59.729		28.652	overweight	0	0	0	0	0	0	0	0	0	0	0	0	0.000247572	0	0	0	0	0	0	0	0	0	0	0	0	0	0	0	0	0	0	0	0	0	0	0	0.0233041	0	0	0
twins	36473	F		Europe	UK	35.7125		24.7051	normal	0	0	0	0	0	0	0	0	0	0	0	0	7.68992e-05	0	0	0	0	0	0	0	0	0	0	0	0	0	0	0	0	0	0	0	0	0	0	0	0.00948167	0	0	0
twins	36474	F		Europe	UK	35.7125		19.3625	normal	0	0	0	0	0	0.00134545	0	0	0	0	0	0	0.000402566	0.000104472	0	0	0	0	0	0	0	0	0	0	0	0	0	0	0	0	0.000265957	0	0	0.000315152	0	0	0.00212121	0	0.000286426	0
twins	36521	F		Europe	UK	73.399		28.4753	overweight	0	0	0	0	0	0.000442353	0	0	0	0.00150588	0	0	0.000316779	0.000164137	0.00107563	0	0	0	0	0	0	0	0	0	0	0	0	0	0	0.000354206	0.000242804	0	0	0.000367059	0	0	0.000254902	0.000434389	0.000148268	0
twins	36522	F		Europe	UK	73.399		27.438	overweight	0	0	0	0	0	7.4392e-05	0	0	0	0	0	0	0.000449953	6.98002e-05	0	0	0	0	0	0	0	0	0	0	0	0	0	0	0	0.000166136	3.34825e-05	0	0	0.000207916	0	0	0.00190749	0	2.74365e-05	0
twins	36525	F		Europe	UK	64.5613		23.8076	normal	0	0	0	0.0036315	0	0.000191131	0	0	0	0.0007263	0	0.000573394	0.000287395	0.000260108	0	0	0	0.000541539	0	0	0	0	0	0	0	0	0.0036315	0	0	7.39864e-05	0.000259248	0	0	0.000273955	0.00191131	0.000350408	0.00245285	0	0.000234332	0
twins	36526	F		Europe	UK	64.5613		24.8692	normal	0	0	0	0	0	0	0	0	0	0	0	0	0.000400594	0.000116564	0.00142755	0	0	0	0	0	0	0	0	0	0	0	0	0	0	0.00013815	0.000187936	0	0	0.000375922	0	0	0.000475851	0.00065887	0.000261555	0.00089222
twins	36533	F		Europe	UK	52.0137		28.0445	overweight	0	0	0	0	0	0	0	0	0	0.000802568	0	0	0.000288569	0.000253499	0	0	0	0	0	0	0	0	0	0	0	0	0	0	0.00168745	0.000293412	0.000159375	0	0.00989834	0.000105226	0	0	0.00494917	0.000246944	0.000106276	0.000713394
twins	36534	F		Europe	UK	52.0137		21.4776	normal	0	0	0	0.00767263	0	0	0	0	0	0	0	0	0.000294024	0.000132776	0	0	0	0	0	0	0	0	0	0	0	0	0	0	0	9.62517e-05	0.00024147	0	0	0.000179028	0	0	0.0073263	0	0.000179554	0.00138534
twins	36587	F		Europe	UK	62.36		22.0718	normal	0	0	0	0	0	0	0	0	0	0	0	0	0.000200931	0	0	0	0	0	0	0	0	0	0	0	0	0	0	0	0	0	0.000826624	0	0	0	0	0	0.0225225	0	0	0
twins	36588	F		Europe	UK	62.36		20.8415	normal	0	0.00387597	0	0	0	0.000319767	0	0	0	0	0.000572586	0	0.00030394	0.000233945	0	0	0	0	0	0	0	0	0	0	0	0	0	0	0	0.000200571	0.000248691	0	0	0.000250323	0	0	0.00305838	0.000913089	0.000396557	0.000524871
twins	36666	F		Europe	UK	56.1944		21.0171	normal	0	0	0	0	0	0	0	0	0	0	0	0	0.000165067	0	0	0	0	0	0	0	0	0	0	0	0	0	0	0	0	0	0	0	0	0	0	0	0.0243103	0	0	0
twins	36667	F		Europe	UK	56.1944		21.4438	normal	0	0	0	0	0	0	0	0	0	0	0	0	0.000220158	0	0	0	0	0	0	0	0	0	0	0	0	0	0	0	0	0	0.000903064	0	0	0.000118159	0	0	0.00221549	0	0.000217236	0
twins	36674	F		Europe	UK	78.2971		27.7753	overweight	0	0	0	0	0	0	0	0	0	0	0	0	0.000752025	0	0	0	0	0	0	0	0	0	0	0	0	0	0	0	0	0	0	0	0	0	0	0	0.00205064	0	0	0
twins	36675	F		Europe	UK	78.2971		26.2378	overweight	0	0	0	0	0	0	0	0	0	0	0	0	0.000723711	0	0	0	0	0	0	0	0	0	0	0	0	0	0	0	0	0.000166784	0	0	0	0	0	0	0.00193887	0	0	0
twins	36694	F		Europe	UK	42.7351		23.0469	normal	0	0	0	0	0	0	0	0	0	0	0	0	0.000343128	0	0	0	0	0	0	0	0	0	0	0	0	0	0	0	0	0	0	0	0	0	0	0	0.0178063	0	0.00052687	0
twins	36695	F		Europe	UK	42.7351		30.3288	obesity	0.000742745	0	0	0	0	0.000311953	0	0.000477479	0.000477479	0.000275877	0.000135045	0.00028295	0.000300764	0.000246334	0.000303161	0.000565901	0.000424426	0	0	0.000300635	0	0	0	0	0	0.00116717	0	0.000477479	0.000436669	0.000247011	0.000269781	0	0.00100801	0.000306648	0	0.000185686	0.000709587	0.000224456	0.000231835	0.00028295
twins	36696	F		Europe	UK	71.1814		26.3535	overweight	0	0	0	0	0	0	0	0	0	0	0	0	0.000540919	0	0	0	0	0	0	0	0	0	0	0	0	0	0	0	0	0	0.00040179	0	0	0	0	0	0.00751073	0	0.000423305	0
twins	36697	F		Europe	UK	71.1814		24.8192	normal	0	0	0	0	0	0	0	0	0	0	0	0	0	0	0	0	0	0	0	0	0	0	0	0	0	0	0	0	0	0	0	0	0	0	0	0	0.0416667	0	0	0
twins	36698	F		Europe	UK	49.525		22.782	normal	0	0	0	0	0	0	0	0	0	0	0	0	0.00070026	3.59168e-05	0	0	0	0	0	0	0	0	0	0	0	0	0	0	0	0	0	0	0	0	0	0	0	0	0	0
twins	36699	F		Europe	UK	49.525		23.9377	normal	0.000633357	0	0	0	0.000269763	0.000272109	0.000226757	0.000809289	0.000433967	0.000248651	0.000211119	0.000179842	0.000275842	0.000260399	0.000234577	0.000336226	0.000269763	0	0	0.000461334	0	0.00012198	0.000179842	0	0	0.00079756	0	0.000621628	0.000225554	0.000265097	0.000320172	0	0.000586441	0.00023661	0.00175932	0.000324498	0.000393893	0.000147964	0.000253696	0.000211119
twins	36702	F		Europe	UK	61.7823		21.1525	normal	0	0	0	0	0	0	0	0	0	0	0	0	0.000190386	0	0	0	0	0	0	0	0	0	0	0	0	0	0	0	0	0.000145799	0	0	0	0	0	0	0.0268362	0	0	0
twins	36703	F		Europe	UK	61.7823		22.8405	normal	0	0	0	0	0	0	0	0	0	0	0.00402253	0	0.000130985	0	0	0	0	0	0	0	0	0	0	0	0	0	0	0	0	0	0	0	0	0	0	0	0.0313422	0	0	0
twins	36794	F		Europe	UK	55.8494		28.0494	overweight	0	0	0	0	0	0	0	0	0	0	0	0	0.000604297	0	0	0	0	0	0	0	0	0	0	0	0	0	0	0	0	0	0	0	0	0	0	0	0	0	0	0
twins	36795	F		Europe	UK	55.8494		32.3047	obesity	0	0	0	0	0	0	0	0	0	0	0	0	0.000554915	0	0	0	0	0	0	0	0	0	0	0	0	0	0	0	0	0	0	0	0	0	0	0	0	0	0.000823978	0
twins	36981	F		Europe	UK	49.6893		32.8305	obesity	0	0	0	0	0	0	0	0	0	0	0	0	0.000386205	0	0	0	0	0	0	0	0	0	0	0	0	0	0	0	0	0	0	0	0	0	0	0	0.0180776	0	0	0
twins	36982	F		Europe	UK	49.6893		33.7768	obesity	0	0	0	0	0	0	0	0	0	0	0	0	8.14533e-05	0	0	0	0	0	0	0	0	0	0	0	0	0	0	0	0	0	0	0	0	0	0	0	0.0364471	0	0	0
twins	37096	F		Europe	UK	64.4517		35.7495	obesity	0	0	0	0	0	0	0	0	0	0	0	0	0.000429826	0	0	0	0	0	0	0	0	0	0	0	0	0	0	0	0	0	0	0	0	0	0	0	0.0179856	0	0	0
twins	37097	F		Europe	UK	64.4517		32.8933	obesity	0	0	0	0	0	0	0	0	0	0.00167203	0	0	0.000275907	0.000117986	0.00165365	0	0	0	0	0	0	0	0	0	0	0	0	0	0.000791491	9.68088e-05	0.00116303	0	0	6.00214e-05	0	0	0.00348339	0	0.000118927	0.00182208
twins	37100	F		Europe	UK	62.9076		20.4631	normal	0	0	0	0	0	0	0	0	0	0	0	0	0.000366555	0.000278275	0.00425285	0	0	0	0	0	0	0	0	0	0	0	0	0	0	0	0	0	0	0.000162382	0	0	0.0090212	0	0.000194635	0
twins	37101	F		Europe	UK	62.9076		19.5051	normal	0	0	0	0	0	0.000227901	0	0	0	0.00117403	0	0	0.000340543	0.000176829	0.00182518	0	0	0	0	0	0	0	0	0	0	0	0	0.00120856	0	0.000181934	0.00012306	0	0	0.000338398	0	0.00048918	0.00018704	0	0.000158461	0
twins	37102	F		Europe	UK	63.2909		27.322	overweight	0	0	0	0	0	0	0	0	0	0	0	0	0.000499561	0	0	0	0	0	0	0	0	0	0	0	0	0	0	0	0	0	0	0	0	0	0	0	0.01305	0	0	0
twins	37103	F		Europe	UK	63.2909		30.5568	obesity	0	0	0	0	0	0	0	0	0	0	0	0	0.000383735	0	0	0	0	0	0	0	0	0	0	0	0	0	0	0	0	0	0	0	0	0	0	0	0.0159847	0	0.000578075	0
twins	37105	F		Europe	UK	64.6461		24.8585	normal	0	0	0	0	0	0.000117736	0	0	0	0	0.000431585	0	0.000383953	0.000213252	0.000379795	0	0	0	0	0	0	0	0	0	0	0	0	0	0	0.000149059	0.000197978	0	0	0.000269654	0	0.000253197	0.00120268	0	0.000275742	0.000474744
twins	37126	F		Europe	UK	47.4908		21.5665	normal	0	0	0	0	0	0	0	0	0	0	0	0	0.000269203	4.25344e-05	0	0	0	0	0	0	0	0	0	0	0	0	0	0	0	0	0	0	0	0.000356306	0	0	0.0164088	0	0	0
twins	37127	F		Europe	UK	47.4908		25.6392	overweight	0	0	0	0	0	0	0	0	0	0	0	0	0.000303883	0	0	0	0	0	0	0	0	0	0	0	0	0	0	0	0	0	0	0	0	0	0	0	0.0253261	0	0	0
twins	37133	F		Europe	UK	61.7303		35.7128	obesity	0	0	0	0	0	0	0	0	0	0	0.00306171	0	0.00064084	0	0	0	0	0	0	0	0	0	0	0	0	0	0	0	0	0	0	0	0	0	0	0	0.00280656	0	0.000591478	0
twins	37134	F		Europe	UK	61.7303		28.4341	overweight	0	0	0	0	0	0.000896785	0	0	0	0	0	0	0.000615477	0	0	0	0	0	0	0	0	0	0	0	0	0	0	0	0	0	0	0	0	0	0	0	0.00564016	0	0	0
twins	37135	F		Europe	UK	38.3326		23.9567	normal	0	0	0	0	0	0	0	0	0	0	0.0261818	0	0.000304947	0	0	0	0	0	0	0	0	0	0	0	0	0	0	0	0	0	0	0	0	0	0	0	0	0	0	0
twins	37136	F		Europe	UK	38.3326		26.1816	overweight	0	0	0	0	0	0	0	0	0	0	0	0	0.000385787	0	0	0	0	0	0	0	0	0	0	0	0	0	0	0	0	0	0	0	0	0	0	0	0.018018	0	0	0
twins	37137	F		Europe	UK	51.1704		25.3029	overweight	0	0	0	0	0	0.000358654	0	0.000681443	0	0.000373001	0.000404301	0.000203237	0.000263362	0.000219387	0.000358654	0.00150635	0	0	0	0.00102814	0	0	0	0.0020802	0	0	0	0.000699376	0.000529705	0.000190511	0.000227021	0	0.00294097	0.000234799	0	0.000352677	0.000618679	0.000182086	0.000249093	0
twins	37138	F		Europe	UK	51.1704		24.789	normal	0.000677613	0	0	0	0	0.000348189	0	0	0.000469116	0.000291895	0.000170588	0.000590739	0.000267511	0.000253159	0.000282959	0.000399618	0	0	0	0.000729737	0	0	0	0	0	0.000886109	0	0.000807923	0.000561336	0.000216343	0.000341579	0	0.00156372	0.000230041	0	0.000286682	0.00135957	0.000136324	0.000229917	0
twins	37171	F		Europe	UK	59.206		32.8865	obesity	0	0	0	0	0	0	0	0	0	0	0	0	0.000605002	4.87773e-05	0	0	0	0	0	0	0	0	0	0	0	0	0	0	0	0	0.000293125	0	0	0	0	0	0.00728047	0	0	0
twins	37172	F		Europe	UK	59.206		23.0501	normal	0	0	0	0	0	0	0	0	0	0	0	0	0.000416033	0	0	0	0	0	0	0	0	0	0	0	0	0	0	0	0	0	0	0	0	0	0	0	0.01561	0	0	0
twins	37173	F		Europe	UK	53.7248		24.8902	normal	0	0	0	0	0.00767813	0	0	0	0	0	0	0	0.000353207	4.70595e-05	0	0	0	0	0	0	0	0	0	0	0	0	0	0	0.0017955	9.24678e-05	0.000147028	0	0	5.32351e-05	0	0	0.00665438	0	0.000109387	0
twins	37174	F		Europe	UK	53.7248		33.8281	obesity	0	0	0	0	0	0	0	0	0	0	0	0	0.000478744	0	0	0	0	0	0	0	0	0	0	0	0	0	0	0	0	0	0	0	0	0	0	0	0	0	0	0
twins	37175	F		Europe	UK	54.8282		26.9238	overweight	0	0	0	0	0	0	0	0	0	0	0	0	5.24211e-05	0.000107974	0	0	0	0	0	0	0	0	0	0	0	0	0	0	0	0.000585788	0	0	0	0	0	0	0.0269314	0	0	0
twins	37176	F		Europe	UK	54.8282		23.8248	normal	0	0	0	0	0	0	0	0	0	0	0	0	0.000457263	0	0	0	0	0	0	0	0	0	0	0	0	0	0	0	0	0	0	0	0	0	0	0	0.0174014	0	0	0
twins	37179	F		Europe	UK	60.178		27.5056	overweight	0	0	0	0	0	0	0	0	0	0	0	0	0.000415972	0	0	0	0	0	0	0	0	0	0	0	0	0	0	0	0	0	0	0	0	0	0	0	0	0	0	0
twins	37181	F		Europe	UK	64.4627		26.4697	overweight	0.000745917	0	0	0	0	0.000387877	0	0.000863693	0.000412217	0.000251256	7.13796e-05	0.000235553	0.000282803	0.00026373	0.000241161	0.000497278	0	0	0	0.000601968	0	0.000157035	0.000392588	0	0	0.0013348	0	0.000490735	0.000465066	0.000274812	0.000264162	0	0.000706658	0.000225607	0	0.000153764	0.00100437	0.000519424	0.000252762	0.000261725
twins	37182	F		Europe	UK	64.4627		24.2424	normal	0.000658472	0	0	0	0	0.000360843	0	0.000812116	0.000504829	0.000289728	7.98148e-05	0.000329236	0.000268872	0.000229315	0.000263389	0.00032192	0	0	0	0.000585309	0	0.000676032	0.000307287	0.00175593	0	0.00100966	0	0.000449956	0.000418721	0.000250644	0.000272262	0	0.000746269	0.000211882	0	0.000179251	0.000857843	0.00019923	0.00029947	0.000270705
twins	37189	F		Europe	UK	48.5804		35.3045	obesity	0	0	0	0	0	0	0	0	0	0	0	0	0.000685377	0	0	0	0	0	0	0	0	0	0	0	0	0	0	0	0	0	0	0	0	0	0	0	0.0064554	0	0	0
twins	37190	F		Europe	UK	48.5804		34.4935	obesity	0	0	0	0	0	0	0	0	0	0	0	0	0	0	0	0	0	0	0	0	0	0	0	0	0	0	0	0	0	0	0	0	0	0	0	0	0.0384161	0	0	0
twins	37191	F		Europe	UK	61.0048		32.647	obesity	0	0	0	0	0	0	0	0	0	0	0	0	0.000489003	0	0	0	0	0	0	0	0	0	0	0	0	0	0	0	0	0	0	0	0	0	0	0	0.0165441	0	0	0
twins	37192	F		Europe	UK	61.0048		33.5244	obesity	0	0	0	0	0	0.000234582	0	0.00071888	0.000756716	0.000302686	0.000192619	0	0.000288694	0.000242729	0.000367548	0.000630597	0	0	0	0	0	0	0	0	0	0.00151343	0	0.000567537	0.000617014	0.000257121	0.000275316	0	0.00128642	0.000302182	0	0.000233321	0.00137155	0.000174627	0.000287656	0.000290074
twins	37193	F		Europe	UK	69.6427		23.0584	normal	0	0	0	0	0	0	0	0	0	0	0	0	0.000229279	0	0	0	0	0	0	0	0	0	0	0	0	0	0	0	0	0	0	0	0	0	0	0	0.0298875	0	0	0
twins	37194	F		Europe	UK	69.6427		26.6432	overweight	0	0	0	0	0	0	0	0	0	0	0	0	0.000538392	0	0	0	0	0	0	0	0	0	0	0	0	0	0	0	0	0	0	0	0	0	0	0	0	0	0	0
twins	37195	F		Europe	UK	59.6167		29.0861	overweight	0	0	0	0	0	0	0	0	0	0	0	0	0.000199357	0	0	0	0	0	0	0	0	0	0	0	0	0	0	0	0	0	0	0	0	0	0	0	0.030573	0	0	0
twins	37196	F		Europe	UK	59.6167		26.9214	overweight	0	0	0	0	0	0	0	0	0	0	0	0	0.000320143	0	0	0	0	0	0	0	0	0	0	0	0	0	0	0	0	0	0	0	0	0	0	0	0.0170565	0	0	0
twins	37197	F		Europe	UK	57.9904		22.1115	normal	0	0	0	0	0	0	0	0	0	0	0	0	0.000650921	0.000196638	0	0	0	0	0	0	0	0	0	0	0	0	0	0	0	0	0	0	0	0	0	0	0.00308461	0	0	0
twins	37198	F		Europe	UK	57.9904		23.1038	normal	0	0	0	0	0	0	0	0	0	0	0.000986193	0	0.000348327	2.38595e-05	0	0	0	0	0	0	0	0	0	0	0	0	0	0	0	0.000190876	0.000419657	0	0	7.88955e-05	0	0	0.00575279	0	0.000439059	0
twins	37199	F		Europe	UK	59.2526		25.0028	overweight	0	0	0	0	0	0	0	0	0	0	0	0	0.000648485	0	0	0	0	0	0	0	0	0	0	0	0	0	0	0	0	0	0	0	0	0	0	0	0.00579912	0	0	0
twins	37200	F		Europe	UK	59.2526		33.1403	obesity	0	0	0	0	0	0	0	0	0	0	0	0	0.000168051	0	0	0	0	0	0	0	0	0	0	0	0	0	0	0	0	0	0	0	0	0	0	0	0.0325325	0	0	0
twins	37201	F		Europe	UK	46.1875		33.0922	obesity	0.000548632	0	0	0	0	0.000252371	0	0.000803354	0.000666196	0.000227291	6.76884e-05	0.000124095	0.000304224	0.000258831	0.000223932	0.000770698	0	0	0	0.000613946	0	0.000180265	0.000352692	0	0	0.000705384	0	0.000372286	0.000334605	0.000294542	0.000358946	0	0.000666196	0.000184184	0	0.00109726	0.00078376	0.000117564	0.000246401	0.000169815
twins	37202	F		Europe	UK	46.1875		32.6938	obesity	0	0	0	0	0.0100671	0	0	0	0	0	0	0	9.4348e-05	0	0	0	0	0	0	0	0	0	0	0	0	0	0	0	0.00189296	0	0	0	0	0	0	0	0.0301392	0	0.000612914	0
twins	37203	F		Europe	UK	60.9884		31.1301	obesity	0	0	0	0	0	0	0	0	0	0	0	0	0.000311935	9.37734e-05	0	0	0	0	0	0	0	0	0	0	0	0	0	0	0	0	0	0	0	0	0	0	0.0134168	0	0	0
twins	37204	F		Europe	UK	60.9884		34.0785	obesity	0	0	0	0	0	0.000350505	0	0	0	0	0	0	0.000291592	3.85452e-05	0	0	0	0	0	0	0	0	0	0	0	0	0	0	0	0	8.75696e-05	0	0	0.000109754	0	0	0.0179235	0	0.000491056	0
twins	37205	F		Europe	UK	64.8487		27.5391	overweight	0	0	0	0	0	0	0	0	0	0	0	0	0.000725922	0	0	0	0	0	0	0	0	0	0	0	0	0	0	0	0	0	0	0	0	0	0	0	0	0	0	0
twins	37206	F		Europe	UK	64.8487		22.8462	normal	0	0	0	0	0	0	0	0	0	0	0	0	2.38952e-05	0	0	0	0	0	0	0	0	0	0	0	0	0	0	0	0	0	0	0	0	0	0	0	0.0404391	0	0	0
twins	37207	F		Europe	UK	65.0815		27.8222	overweight	0	0	0	0	0	0	0	0	0	0	0	0	0	0	0	0	0	0	0	0	0	0	0	0	0	0	0	0	0	0	0	0	0	0	0	0	0	0	0	0
twins	37208	F		Europe	UK	65.0815		22.2596	normal	0	0	0	0	0	0.00031486	0	0	0	0.000382938	0.000406146	0.000478672	0.000288661	0.000238478	0.000319115	0	0	0	0	0	0	0	0	0	0	0.00212743	0	0.000930752	0.000900068	0.000183005	0.000187848	0	0	0.00020707	0	0.000948481	0.00234018	0.000106372	0.000158829	0.000265929
twins	37209	F		Europe	UK	46.5161		23.2874	normal	0	0.00145075	0	0	0	0.000197733	0.0015224	0	0	0	0.000254004	0	0.000302475	0.0002666	0.000222603	0	0	0	0	0	0	0	0	0	0	0	0	0	0	0.000197016	0.000325534	0	0	0.000310927	0	0.000300002	0.000559705	0.000305857	0.000333799	0.000331345
twins	37210	F		Europe	UK	46.5161		24.0955	normal	0.000700876	0	0	0	0	0.000321902	0.000258657	0.000763454	0.000362954	0.000350438	0.000320856	0.000225282	0.00027441	0.000240522	0.000271768	0.000592407	0	0	0	0.000692532	0	0.000125156	0.000342094	0	0	0.000826033	0	0.00057572	0.000279195	0.000258118	0.000270684	0	0.000926158	0.000250647	0	0.000269086	0.000735294	0.000165592	0.000276201	0.000458907
twins	37222	F		Europe	UK	55.7454		23.6926	normal	0	0	0	0	0	0	0	0	0	0	0	0	0.000742072	0	0	0	0	0	0	0	0	0	0	0	0	0	0	0	0	0	0	0	0	0	0	0	0.00297129	0	0	0
twins	37223	F		Europe	UK	55.7454		27.4368	overweight	0.000410241	0.000522125	0	0	0.000139855	0.000278964	0.00055942	0.000606038	0.000289034	0.000145449	0.000393289	0.000130531	0.000283702	0.000257303	0.000239751	0.000304573	0	0	0	0.000348083	0	0.000119343	0.000142963	0	0	0.000596714	0	0.000317004	0.000190776	0.000231187	0.000297861	0	0.000391594	0.000305692	0	0.000222214	0.000272717	0.000451839	0.000299762	0.00032322
twins	37228	F		Europe	UK	55.1951		34.7014	obesity	0	0	0	0	0	0	0	0	0	0	0	0	0.000600826	0	0	0	0	0	0	0	0	0	0	0	0	0	0	0	0	0	0	0	0	0	0	0	0	0	0.000251549	0
twins	37229	F		Europe	UK	55.1951		28.257	overweight	0	0	0	0	0	0.000286725	0	0.000568397	0.00053682	0.000277883	0.000137793	0	0.000277463	0.000271338	0.000297732	0.000568397	0	0	0	0	0	0	0	0	0	0.0012631	0	0.00053682	0.000855025	0.000249225	0.000211301	0	0.00227359	0.000230306	0	0.000594712	0.00214465	0.000136027	0.000192926	0
twins	37232	F		Europe	UK	50.642		25.2818	overweight	0	0	0	0	0	0.000475	0	0	0	0	0.000833333	0	0.000284536	0.000238575	0	0	0	0	0	0	0	0	0	0	0	0	0	0	0	0.000224014	0.000132979	0	0	0.000369444	0	0	0.00675347	0	0.000428082	0
twins	37233	F		Europe	UK	50.642		27.268	overweight	0	0	0	0	0	0.000436681	0	0	0	0.000873362	0	0	0.000302672	0.00022281	0	0.00246333	0	0	0	0	0	0	0	0	0	0	0	0.00344306	0	0.00026367	0.000155447	0	0	0.000201545	0	0.000419886	0.000475871	0.000361748	0.000167954	0
twins	37254	F		Europe	UK	66.642		24.3531	normal	0	0.00172508	0	0	0	0.000168876	0.00163428	0	0	0	0.000173333	0	0.000302571	0.000250414	0.00024644	0	0	0	0	0	0	0	0	0	0	0	0	0	0	0.000193302	0.000327919	0	0	0.000297198	0	0.000317777	0.00129759	0.000111746	0.000300365	0.000348042
twins	37255	F		Europe	UK	66.642		23.9	normal	0	0	0	0.00186057	0	0.000247346	0.00127686	0	0	0.000415891	0	0.000328335	0.000294517	0.000268758	0	0	0	0.000364817	0	0	0	0	0	0	0	0	0.0021889	0	0	0.000145927	0.000266627	0	0	0.000294772	0.000985006	0.000173288	0.00192897	0	0.000312593	0.000273613
twins	37264	F		Europe	UK	51.8357		26.7848	overweight	0	0	0	0	0	0.000186199	0.00206888	0	0	0	0	0	0.000272564	0.000245483	0	0	0	0	0	0	0	0	0	0	0	0	0	0	0	0.000239472	0.000198084	0	0	0.000279908	0	0.000273823	0.000395521	0	0.00119282	0.000456371
twins	37265	F		Europe	UK	51.8357		28.3645	overweight	0	0	0	0.00366032	0	0.000207418	0	0	0	0.000707662	0	0.000589719	0.000290035	0.000310931	0	0	0	0.000427038	0	0	0	0	0	0	0	0	0.00378233	0	0	0.000124635	0.000258948	0	0	0.000296079	0.00189117	0.000294859	0.0005643	0	0.0002482	0
twins	37268	F		Europe	UK	62.1218		22.3886	normal	0	0	0	0	0	0	0	0	0	0	0	0	0.00081103	0	0	0	0	0	0	0	0	0	0	0	0	0	0	0	0	0	0	0	0	0	0	0	0	0	0	0
twins	37269	F		Europe	UK	62.1218		32.9599	obesity	0	0	0	0	0	0.00133891	0	0	0	0	0.00177507	0	0.000102369	4.35844e-05	0	0	0	0	0	0	0	0	0	0	0	0	0	0	0	0.000172463	0.000144663	0	0	0.000176662	0	0	0	0	6.68692e-05	0
twins	37270	F		Europe	UK	64.6105		27.4066	overweight	0	0	0	0	0	0	0	0	0	0	0	0	0.000504514	0	0	0	0	0	0	0	0	0	0	0	0	0	0	0	0	0	0	0	0	0	0	0	0.00978091	0	0.000795871	0
twins	37271	F		Europe	UK	64.6105		39.8508	obesity	0	0	0	0	0	0	0	0	0	0	0	0	0.000106186	0	0	0	0	0	0	0	0	0	0	0	0	0	0	0	0	0	0	0	0	0	0	0	0.0353857	0	0	0
twins	37276	F		Europe	UK	69.5551		16.1665	underweight	0	0	0	0	0	0	0	0	0	0	0	0	0.000690471	0	0	0	0	0	0	0	0	0	0	0	0	0	0	0	0	0	0	0	0	0	0	0	0	0	0	0
twins	37277	F		Europe	UK	69.5633		19.2806	normal	0	0	0	0	0	0	0	0	0	0	0	0	5.91653e-05	0	0	0	0	0	0	0	0	0	0	0	0	0	0	0	0	0	0	0	0	0	0	0	0.0375683	0	0	0
twins	37282	F		Europe	UK	62.3436		33.7623	obesity	0	0	0	0	0	0	0	0	0	0	0	0	0.000710976	0	0	0	0	0	0	0	0	0	0	0	0	0	0	0	0	0	0	0	0	0	0	0	0.0051403	0	0	0
twins	37283	F		Europe	UK	62.3436		30.3871	obesity	0	0	0	0	0	0	0	0	0	0	0	0	0.000553874	0	0	0	0	0	0	0	0	0	0	0	0	0	0	0	0	0	0	0	0	0	0	0	0.00530223	0	0	0
twins	37284	F		Europe	UK	61.7221		25.4187	overweight	0	0	0	0	0	0	0	0	0	0	0	0	0.000805863	0	0	0	0	0	0	0	0	0	0	0	0	0	0	0	0	0	0	0	0	0	0	0	0	0	0	0
twins	37285	F		Europe	UK	61.7221		22.4261	normal	0	0	0	0	0	0	0	0	0	0	0	0	0.000746663	0	0	0	0	0	0	0	0	0	0	0	0	0	0	0	0	0	0	0	0	0	0	0	0	0	0	0
twins	37286	F		Europe	UK	64.2847		27.5551	overweight	0	0	0	0	0	0	0	0	0	0	0	0	0.000334929	8.24352e-05	0	0	0	0	0	0	0	0	0	0	0	0	0	0	0	0.000131896	0.000161563	0	0	0.000272586	0	0	0.00413746	0.00134795	0.000856164	0
twins	37287	F		Europe	UK	64.2847		30.5234	obesity	0	0	0	0	0	0.000127267	0.00166154	0	0	0	0.000173546	0	0.000292707	0.000257014	0.000257564	0	0	0	0	0	0	0	0	0	0	0	0	0	0	0.000254306	0.00031309	0	0.00604518	0.000451091	0	0.000327005	0.000631916	0.000644493	0.000326158	0.000335843
twins	37292	F		Europe	UK	57.1472		23.0701	normal	0	0	0	0	0	0	0	0	0	0	0	0	0.000150155	0.000249639	0	0	0	0	0	0	0	0	0	0	0	0	0	0	0.00272134	0	0.000407718	0	0	0	0	0	0.00835299	0	0.000557315	0
twins	37293	F		Europe	UK	57.1472		24.0346	normal	0	0	0	0	0	0	0	0	0	0	0	0	0.000303321	0	0	0	0	0	0	0	0	0	0	0	0	0	0	0	0	0	0	0	0	0	0	0	0.0245755	0	0	0
twins	37296	F		Europe	UK	62.5544		34.3321	obesity	0	0	0	0	0	0.000131291	0	0	0	0	0.000361683	0	0.000304277	0.000237829	0.000369434	0	0	0	0	0	0	0	0	0	0	0	0	0	0	0.00016898	0.000211623	0	0	0.000301041	0	0.000563623	0.00337345	0.000535569	0.000378777	0.00046416
twins	37297	F		Europe	UK	62.5544		27.2899	overweight	0	0	0	0	0	0	0	0	0	0	0	0	0.000400928	0.000456138	0	0	0	0	0	0	0	0	0	0	0	0	0	0	0	0.000681166	0	0	0	0.00061086	0	0	0	0	0	0
twins	37298	F		Europe	UK	57.1581		23.2022	normal	0	0	0	0	0	0	0	0	0	0	0	0	0.000277428	0	0	0	0	0	0	0	0	0	0	0	0	0	0	0	0	0	0	0	0	0	0	0	0.0247126	0	0	0
twins	37299	F		Europe	UK	57.1581		24.6212	normal	0	0	0	0	0	0	0	0	0	0	0	0	9.36465e-05	0	0	0	0	0	0	0	0	0	0	0	0	0	0	0	0	0	0	0	0	0.000416667	0	0	0.0317797	0	0.000253947	0
twins	37304	F		Europe	UK	63.8905		28.4375	overweight	0	0	0	0	0	0	0	0	0	0	0	0	0.000522901	0	0	0	0	0	0	0	0	0	0	0	0	0	0	0	0	0	0	0	0	0	0	0	0.0108279	0	0	0
twins	37305	F		Europe	UK	63.8905		28.4874	overweight	0	0	0	0	0	0	0	0	0	0	0	0	0.000556404	0	0	0	0	0	0	0	0	0	0	0	0	0	0	0	0	0	0	0	0	0	0	0	0.0113049	0	0	0
twins	37308	F		Europe	UK	62.3819		23.3739	normal	0	0	0	0	0	0	0	0	0	0	0	0	0.00023655	0	0	0	0	0	0	0	0	0	0	0	0	0	0	0	0	0	0	0	0	0	0	0	0.0251736	0	0	0
twins	37309	F		Europe	UK	62.3819		19.0629	normal	0	0	0	0	0	0	0	0	0	0	0	0	0.000204118	0.000236794	0	0	0	0	0	0	0	0	0	0	0	0	0	0	0	0	0	0	0	0	0	0	0.0146812	0	0	0
twins	37314	F		Europe	UK	69.1362		17.7619	underweight	0	0	0	0	0	0.000172778	0	0	0	0	0	0.000383951	0.000356392	0.00021365	0.000356526	0	0	0	0	0	0	0	0	0	0	0	0	0	0	0.000169269	0.000295111	0	0	0.000319959	0	0.000223971	0.00247968	0.000191975	0.000301112	0.000415947
twins	37315	F		Europe	UK	69.1362		18.1359	underweight	0	0	0	0	0	0.000119467	0	0	0	0	0	0	0.00027937	0.000365306	0	0	0	0	0	0	0	0.00367591	0.00173585	0	0	0	0	0	0	6.09357e-05	0.000153163	0.00873028	0	0.000345127	0	0.00104661	0.000510543	0.000435925	0.000102808	0.00173585
twins	37316	F		Europe	UK	68.6242		23.7824	normal	0	0	0	0	0	0.00042602	0	0.00102583	0.000603427	0.000289645	0.0001536	0	0.00027744	0.000235288	0.000327575	0.000543085	0	0	0	0.000341942	0	0.000217234	0	0	0	0.00102583	0	0.000527999	0.000255296	0.000265378	0.000369439	0	0.000965484	0.00024821	0.00181028	0.000749256	0.000326857	0.000162461	0.000235171	0.000533028
twins	37317	F		Europe	UK	68.6242		24.6319	normal	0	0	0	0	0	0	0	0	0	0	0	0	0.000271042	0.000354255	0.0055371	0	0	0	0	0	0	0	0	0	0	0	0	0	0	0	0	0	0	0	0	0	0.00111255	0	0	0
twins	37322	F		Europe	UK	56.2355		27.9337	overweight	0	0	0	0	0	0.000234858	0	0	0	0	0	0	0.00042356	0.000150774	0	0	0	0	0	0	0	0	0	0	0	0	0	0	0	0.00015285	0.000161087	0	0	0.000313144	0	0	0.000334775	0.00104593	0.000114296	0
twins	37323	F		Europe	UK	56.2355		20.5953	normal	0	0	0	0	0	0	0	0	0	0	0	0	0.000109503	0	0	0	0	0	0	0	0	0	0	0	0	0	0	0	0	0	0	0	0	0	0	0	0.0323782	0	0.000498979	0
twins	37330	F		Europe	UK	65.7084		30.7793	obesity	0	0	0	0	0	0	0	0	0	0	0	0	0.000330618	0	0	0	0	0	0	0	0	0	0	0	0	0	0	0	0	0	0	0	0	0	0	0	0.00989446	0	0.000659631	0
twins	37331	F		Europe	UK	65.7084		27.7567	overweight	0	0	0	0	0	0.000304414	0	0	0	0.00039808	0.000351247	0	0.000271008	0.000246203	0.000250891	0.000897631	0	0	0	0	0	0	0	0	0	0	0	0.00152207	0.000720507	0.000401605	0.000331941	0	0	0.000224017	0.00228311	0.000321976	0.001244	0.000117082	0.000291904	0.000507357
twins	37332	F		Europe	UK	67.4387		24.6044	normal	0	0	0	0	0	0	0	0	0	0	0	0	0.000519032	0.000161494	0	0	0	0	0	0	0	0	0	0	0	0	0	0	0	0	0	0	0	0	0	0	0.0066751	0	0	0.00674536
twins	37333	F		Europe	UK	67.4387		28.7431	overweight	0	0	0	0	0	0	0	0	0	0	0	0	0.00044816	0	0	0	0	0	0	0	0	0	0	0	0	0	0	0	0	0	0	0	0	0	0	0	0.0119503	0	0	0
twins	37336	F		Europe	UK	64.9966		21.6845	normal	0	0	0	0	0	0	0	0	0	0	0.0017584	0	0.000210993	0	0	0	0	0	0	0	0	0	0	0	0	0	0	0	0	0	0	0	0	0	0	0	0.0269987	0	0	0
twins	37337	F		Europe	UK	64.9966		20.0784	normal	0	0.00218254	0	0	0	0.00021627	0.000793651	0	0	0	0.000333694	0	0.000303734	0.000243816	0.000283447	0	0	0	0.00109127	0	0	0	0	0	0	0	0	0	0	0.000217614	0.000263847	0	0	0.000269841	0	0.000363757	0.000578704	0.000450244	0.0004308	0.000330688
twins	37348	F		Europe	UK	50.6201		26.3463	overweight	0	0	0	0	0	0	0	0	0	0	0	0	0.000360458	0	0	0	0	0	0	0	0	0	0	0	0	0	0	0	0	0	0	0	0	0	0	0	0.0150463	0	0	0
twins	37349	F		Europe	UK	50.6201		22.1367	normal	0	0	0	0	0	0.000214956	0.00199872	0	0	0	0.00018513	0.000395972	0.000318301	0.000239043	0.000258594	0	0	0	0	0	0	0	0	0	0	0	0	0	0	0.00020194	0.000293669	0	0	0.0002851	0	0.000160275	0.000669382	0.000504756	0.000442466	0.000339405
twins	37352	F		Europe	UK	64.501		24.6598	normal	0	0	0	0	0	0	0	0	0	0	0	0	0.0002662	0.000267787	0	0	0	0	0.0600255	0	0	0	0	0	0	0	0	0	0	0	0	0	0	0	0	0	0.0106428	0	0	0
twins	37353	F		Europe	UK	64.501		24.025	normal	0	0	0	0	0	0	0	0	0	0	0	0	7.08869e-05	0	0	0	0	0	0	0	0	0	0	0	0	0	0	0	0	0	0	0	0	0	0	0	0	0	0	0
twins	37393	F		Europe	UK	67.0445		23.1067	normal	0	0	0	0	0	0.000280622	0	0	0	0.000985969	0	0	0.000335546	0.000162085	0	0.0020225	0	0	0.00303375	0	0	0	0	0	0	0	0	0	0	0.00015495	0.000350979	0	0.00644672	0.000288206	0	0	0.00474024	0	4.41556e-05	0
twins	37394	F		Europe	UK	67.0445		24.6156	normal	0	0	0	0	0	0.00101818	0	0	0	0	0	0	0.0004064	8.21114e-05	0	0	0	0	0	0	0	0	0	0	0	0	0	0	0	0	0.000193424	0	0	0.000334545	0	0	0.00787879	0	0.000194271	0
twins	37399	F		Europe	UK	51.7153		19.4034	normal	0	0	0	0	0	0	0	0	0	0	0	0	0.000393227	0	0	0	0	0	0	0	0	0	0	0	0	0	0	0	0	0	0	0	0	0	0	0	0.0214646	0	0	0
twins	37400	F		Europe	UK	51.7153		23.2049	normal	0	0	0	0	0	0	0	0	0	0	0	0	0.000782719	0	0	0	0	0	0	0	0	0	0	0	0	0	0	0	0	0	0	0	0	0	0	0	0	0	0	0
twins	37405	F		Europe	UK	62.0205		21.0269	normal	0	0	0	0	0	0	0	0	0	0	0	0	6.78032e-05	0	0	0	0	0	0	0	0	0	0	0	0	0	0	0	0	0	0	0	0	0	0	0	0.0267953	0	0	0
twins	37406	F		Europe	UK	62.0205		27.7193	overweight	0	0	0	0	0	0	0	0	0	0	0	0	0.000272176	0	0	0	0	0	0	0	0	0	0	0	0	0	0	0	0	0	0	0	0	0	0	0	0.00508475	0	0	0
twins	37461	F		Europe	UK	79.1978		24.0074	normal	0	0	0	0	0	0	0	0	0	0	0	0	0.000123736	0	0	0	0	0	0	0	0	0	0	0	0	0	0	0	0	0	0	0	0	0	0	0	0.011558	0	0.0037239	0
twins	37462	F		Europe	UK	79.1978		22.4183	normal	0	0	0	0	0	9.56938e-05	0.00200648	0	0	0	0	0	0.000362892	0.000218137	0.00030869	0	0	0	0	0	0	0	0	0	0	0	0	0	0	0.000194176	0.000287344	0	0	0.000304574	0	0.000411586	0.000662396	0	0.000315033	0.00043731
twins	37543	F		Europe	UK	64.6242		29.891	overweight	0	0	0	0	0	0	0	0	0	0	0	0	0	0.00163368	0	0	0	0	0	0	0	0	0	0	0	0	0	0	0	0	0	0	0	0	0	0	0.0028326	0	0.000383021	0
twins	37544	F		Europe	UK	64.6242		27.847	overweight	0	0	0	0	0	0	0	0	0	0	0	0	0.000387358	0	0	0	0	0	0	0	0	0	0	0	0	0	0	0	0	0	0	0	0	0	0	0	0.0149254	0	0	0
twins	37545	F		Europe	UK	65.87		31.5711	obesity	0	0	0	0	0	0	0	0	0	0	0	0	0.000236939	0.000140009	0.00102627	0	0	0	0	0	0	0	0	0	0	0	0	0	0	0.000231739	0.000239464	0	0	0.000542784	0	0.000598659	0.00439017	0.000921014	0.000246024	0.00103768
twins	37546	F		Europe	UK	65.87		29.2257	overweight	0	0	0	0	0	0	0	0	0	0	0	0	0.000341833	0	0	0	0	0	0	0	0	0	0	0	0	0	0	0	0	0	0	0	0	0	0	0	0.0161703	0	0.000927254	0
twins	37583	F		Europe	UK	72.6516		22.3457	normal	0	0	0	0	0	0	0	0	0	0	0	0	0.00052064	0	0	0	0	0	0	0	0	0	0	0	0	0	0	0	0	0	0	0	0	0	0	0	0.00971045	0	0	0
twins	37584	F		Europe	UK	72.6516		25.8697	overweight	0	0	0	0	0	0	0	0	0	0	0	0	0.000302658	0	0	0	0	0	0	0	0	0	0	0	0	0	0	0	0	0	0	0	0	0	0	0	0.0206511	0	0	0
twins	37647	F		Europe	UK	64.5311		21.2874	normal	0	0	0	0	0	0	0	0	0	0	0	0	4.85232e-05	0	0	0	0	0	0	0	0	0	0	0	0	0	0	0	0	0	0	0	0	0	0	0	0.0391738	0	0	0
twins	37648	F		Europe	UK	64.5311		19.9949	normal	0	0	0	0	0	0	0	0	0	0	0	0	0.000184972	0	0	0	0	0	0	0	0	0	0	0	0	0	0	0	0	0	0	0	0	0	0	0	0.0263158	0	0.000584795	0
twins	37651	F		Europe	UK	65.0349		22.4359	normal	0	0	0	0	0	0	0	0	0	0	0	0	0.000409118	5.87125e-05	0	0	0	0	0	0	0	0	0	0	0	0	0	0	0	0.000217601	0	0	0	9.21356e-05	0	0	0.0125452	0	9.12791e-05	0
twins	37652	F		Europe	UK	65.0349		23.6635	normal	0	0	0	0	0	0	0	0	0	0	0	0	0.000615011	0	0	0	0	0	0	0	0	0	0	0	0	0	0	0	0	0	0	0	0	0	0	0	0.00419604	0	0	0
twins	37753	F		Europe	UK	58.694		22.6274	normal	0	0.00296883	0	0	0	0.000201221	0.000879653	0	0	0	0.000232408	0	0.000285593	0.000289966	0.000270964	0	0	0	0.000907142	0	0	0	0	0	0	0	0	0	0	0.000165822	0.000299602	0	0	0.000383199	0	0.000412337	0.000446699	0.000298151	0.000379011	0.00032987
twins	37754	F		Europe	UK	58.694		29.2951	overweight	0	0	0	0	0	0	0	0	0	0	0	0	0.000222338	0	0	0	0	0	0	0	0	0	0	0	0	0	0	0	0	0	0	0	0	0	0	0	0.0194704	0	0	0
twins	37797	F		Europe	UK	59.948		25.3165	overweight	0	0	0	0	0	0	0	0	0	0	0	0	0.000228752	0	0	0	0	0	0	0	0	0	0	0	0	0	0	0	0	0	0	0	0	0	0	0	0.0240385	0	0.000965929	0
twins	37798	F		Europe	UK	59.948		24.4057	normal	0	0	0	0	0	0	0	0	0	0	0	0	0.000301283	0.000347054	0	0.00234522	0	0	0	0	0	0	0	0	0	0	0	0	0.000829846	0	0.000212067	0	0	0	0	0	0.00840369	0	0.000199183	0
twins	37829	F		Europe	UK	71.8138		23.9941	normal	0	0	0	0	0	0	0	0	0	0	0	0	0.000380085	4.35038e-05	0	0	0	0	0	0	0	0	0	0	0	0	0	0	0	0	0	0	0.0674309	0	0	0	0.00280962	0	8.77525e-05	0
twins	37830	F		Europe	UK	71.8138		24.5094	normal	0	0	0	0	0	0	0	0	0	0	0	0	0.000194225	0.000303025	0	0	0	0	0	0	0	0	0	0	0	0	0	0	0.00292893	0	0.000586279	0	0	0	0	0	0.00668003	0	0	0
twins	37877	F		Europe	UK	47.4278		20.9727	normal	0	0	0	0	0	0	0	0	0	0	0	0	0.0002226	0	0	0	0	0	0	0	0	0	0	0	0	0	0	0	0	0	0	0	0	0	0	0	0.0178103	0	0.000223431	0
twins	37878	F		Europe	UK	47.4278		22.0018	normal	0	0	0	0	0	0	0	0	0	0	0.0109352	0	0.000192201	0	0	0	0	0	0	0	0	0	0	0	0	0	0	0	0	0.000907318	0	0	0	0	0	0	0.013465	0	0	0
twins	37879	F		Europe	UK	41.9357		23.8321	normal	0	0	0	0	0	0	0	0	0	0	0	0	0.000684307	0	0	0	0	0	0	0	0	0	0	0	0	0	0	0	0	0	0	0	0	0	0	0	0	0	0	0
twins	37880	F		Europe	UK	41.9357		25.4645	overweight	0	0	0	0	0	0	0	0	0	0	0	0	5.11773e-05	0	0	0	0	0	0	0	0	0	0	0	0	0	0	0	0	0	0	0	0	0	0	0	0.0365419	0	0.000197788	0
enteritis	CJR0607	M		Asia	China		gastric cancer			0	0	0	0	0	0	0	0	0	0	0	0	0.000167355	0	0	0	0	0	0	0	0	0	0	0	0	0	0	0	0	0	0	0	0	0	0	0	0.0330688	0	0	0
enteritis	DCY0308	F		Asia	China		colon cancer			0	0	0	0	0	0	0	0	0	0.00296943	0.00206431	0	0.000172123	0.000121496	0	0	0	0.0062591	0	0	0	0	0	0	0	0	0	0	0	0	0.000195113	0	0	0	0	0	0.00251092	0	0	0
enteritis	DK0307	F		Asia	China		gastric cancer			0	0	0	0	0	0	0	0	0	0	0	0	0	0	0	0	0	0	0	0	0	0	0	0	0	0	0	0	0	0	0	0	0	0	0	0	0.0345345	0	0	0
enteritis	DXZ0206	F		Asia	China		esophageal carcinoma			0	0	0	0	0	0	0	0	0	0	0	0	9.96002e-05	0	0	0	0	0	0	0	0	0	0	0	0	0	0	0	0	0	0	0	0	0	0	0	0.0365497	0	0	0
enteritis	FGL0209	F		Asia	China		colon cancer			0	0	0	0	0	0	0	0	0	0	0	0	1.51711e-05	0	0	0	0	0	0	0	0	0	0	0	0	0	0	0	0	0	0	0	0	0	0	0	0.0408873	0	0	0
enteritis	GFC0307	M		Asia	China		gastric cancer			0	0	0	0	0	0	0	0	0	0	0	0	0.000351233	2.38125e-05	0	0	0	0	0	0	0	0	0	0	0	0	0	0	0	0	0	0	0	0	0	0	0.0147638	0	0.00121346	0
enteritis	HFS0223	M		Asia	China		gastric cancer			0	0	0	0	0	0	0	0	0	0	0	0	0	0	0	0	0	0	0	0	0	0	0	0	0	0	0	0	0	0	0	0	0	0	0	0	0.0189394	0	0	0
enteritis	HLT0605	M		Asia	China		others			0	0	0	0	0	0	0	0	0	0	0	0	0.00025428	0	0	0	0	0	0	0	0	0	0	0	0	0	0	0	0	0	0	0	0	0	0	0	0.0258112	0	0	0
enteritis	JSZ0202	F		Asia	China		gastric cancer			0	0	0	0	0	0	0	0	0	0	0	0	0.000645138	0	0	0	0	0	0	0	0	0	0	0	0	0	0	0	0	0	0	0	0	0	0	0	0	0	0	0
enteritis	KL0213	M		Asia	China		others			0	0	0	0	0	0	0	0	0	0	0	0	1.75233e-05	0	0	0	0	0	0	0	0	0	0	0	0	0	0	0	0	0	0	0	0	0	0	0	0.0407664	0	0	0
enteritis	LBZ0426	M		Asia	China		others			0	0	0	0	0	0	0	0	0	0	0	0	0.000251513	9.36179e-05	0	0	0	0	0	0	0	0	0	0	0	0	0	0	0	0	0	0	0	0	0	0	0.0165837	0	0	0
enteritis	LCR0131	F		Asia	China		others			0	0	0	0	0	0	0	0	0	0	0	0	0.000332885	0.000135412	0	0	0	0	0	0	0	0	0	0	0	0	0	0	0	0	0	0	0	0	0	0	0.0217662	0	0	0
enteritis	LDG0202	M		Asia	China		colon cancer			0	0	0	0	0	0	0	0	0	0	0	0	3.11251e-05	0	0	0	0	0	0	0	0	0	0	0	0	0	0	0	0	0	0	0	0	0	0	0	0.0347222	0	0	0
enteritis	LJD0426	M		Asia	China		esophageal carcinoma			0	0	0	0	0	0	0	0	0	0	0	0	0	0	0	0	0	0	0	0	0	0	0	0	0	0	0	0	0	0	0	0	0	0	0	0	0	0	0	0
enteritis	LJS0605	M		Asia	China		gastric cancer			0	0	0	0	0	0	0	0	0	0	0	0	8.1103e-05	0	0	0	0	0	0	0	0	0	0	0	0	0	0	0	0	0	0	0	0	0	0	0	0.0208333	0	0.00273973	0
enteritis	LJZ0228	M		Asia	China		gastric cancer			0	0	0	0	0	0	0	0	0	0	0	0	0.000662985	0	0	0	0	0	0	0	0	0	0	0	0	0	0	0	0	0	0	0	0	0	0	0	0	0	0	0
enteritis	LLY0530	F		Asia	China		gastric cancer			0	0	0	0	0	0	0	0	0	0	0	0	0.0003212	0	0	0	0	0	0	0	0	0	0	0	0	0	0	0	0	0	0	0	0	0	0	0	0.0231023	0	0	0
enteritis	LMR0315	M		Asia	China		others			0	0	0	0	0	0	0	0	0	0	0	0	0.000117955	0	0	0	0	0	0	0	0	0	0	0	0	0	0	0	0	0	0	0	0	0	0	0	0.0348906	0	0	0
enteritis	LQR0426	F		Asia	China		others			0	0	0	0	0	0	0	0	0	0	0	0	0.000514692	0	0	0	0	0	0	0	0	0	0	0	0	0	0	0	0	0	0	0	0	0	0	0	0.0152244	0	0	0
enteritis	LRH0523	M		Asia	China		gastric cancer			0	0	0	0	0	0	0	0	0	0	0	0	0.00081103	0	0	0	0	0	0	0	0	0	0	0	0	0	0	0	0	0	0	0	0	0	0	0	0	0	0	0
enteritis	LSW0213	M		Asia	China		esophageal carcinoma			0	0	0	0	0	0	0	0	0	0	0	0	5.78389e-05	0	0	0	0	0	0	0	0	0	0	0	0	0	0	0	0	0	0	0	0	0	0	0	0.0125462	0	0.00141111	0
enteritis	LY0604	M		Asia	China		others			0	0	0	0	0	0	0	0	0	0	0	0	0.000156387	0	0	0	0	0	0	0	0	0	0	0	0	0	0	0	0	0	0	0	0	0	0	0	0.0336323	0	0	0
enteritis	LYX0319	F		Asia	China		colon cancer			0	0	0	0	0	0	0	0	0	0	0	0	0	0	0	0	0	0	0	0	0	0	0	0	0	0	0	0	0	0	0	0	0	0	0	0	0	0	0	0
enteritis	LZH0301	M		Asia	China		others			0	0	0	0	0	0	0	0	0	0	0	0	0.000712207	0	0	0	0	0	0	0	0	0	0	0	0	0	0	0	0	0	0	0	0	0	0	0	0	0	0	0
enteritis	SCL0409	M		Asia	China		others			0	0	0	0	0	0	0	0	0	0	0	0	0.00040953	0	0	0	0	0	0	0	0	0	0	0	0	0	0	0	0	0	0	0	0	0	0	0	0.0206271	0	0	0
enteritis	SQ0308	M		Asia	China		esophageal carcinoma			0	0	0	0	0	0	0	0	0	0	0	0	0.000211974	0.000155792	0	0	0	0	0	0	0	0	0	0	0	0	0	0	0	0	0	0	0	0	0	0	0	0	0	0
enteritis	WKS0327	M		Asia	China		colon cancer			0	0	0	0	0	0	0	0	0	0	0	0	2.01916e-05	0	0	0	0	0	0	0	0	0	0	0	0	0	0	0	0	0	0	0	0	0	0	0	0.0406293	0	0	0
enteritis	WXJ0412	F		Asia	China		gastric cancer			0	0	0	0	0	0	0	0	0	0	0	0	0.000317951	0	0	0	0	0	0	0	0	0	0	0	0	0	0	0	0	0	0	0	0	0	0	0	0.0253319	0	0	0
enteritis	XBQ0305	M		Asia	China		esophageal carcinoma			0	0	0	0	0	0	0	0	0	0	0	0	0.000331253	0	0	0	0	0	0	0	0	0	0	0	0	0	0	0	0	0	0	0	0	0	0	0	0.0216638	0	0.000191907	0
enteritis	YJP0213	F		Asia	China		gastric cancer			0	0	0	0	0	0	0	0	0	0	0	0	0.000144967	0	0	0	0	0	0	0	0	0	0	0	0	0	0	0	0	0	0	0	0	0	0	0	0.034219	0	0	0
Feng	ERR688505	M	Urban	Europe	Austria	64	carcinoma	29.3524	overweight	0	0	0	0	0	0	0	0	0	0	0	0	8.65706e-05	0	0	0	0	0	0	0	0	0	0	0	0	0	0	0	0	0	0	0	0	0	0	0	0.0210674	0	0	0
Feng	ERR688506	M	Urban	Europe	Austria	68	controls	32	obesity	0	0	0	0	0	0.00021121	0	0	0	0	0	0	0.000234546	0.000158866	0	0	0	0	0	0	0	0	0	0	0	0	0	0	0	0.000480421	0.000263581	0	0	0.000368264	0	0.000947739	0.000541565	0	0.000317149	0
Feng	ERR688507	F	Urban	Europe	Austria	60	controls	22.1	normal	0	0	0	0	0	0	0	0	0	0	0.00382082	0	0.000543037	0	0	0	0	0	0	0	0	0	0	0	0	0	0	0	0	0	0	0	0	0	0	0	0.00175121	0	0.00129045	0
Feng	ERR688508	M	Urban	Europe	Austria	70	advanced adenoma	34.11	obesity	0	0	0	0	0	0	0	0	0	0	0	0	0.000755957	0	0	0	0	0	0	0	0	0	0	0	0	0	0	0	0	0	0	0	0	0	0	0	0.00152146	0	0	0
Feng	ERR688509	M	Urban	Europe	Austria	68	controls	23.45	normal	0	0	0	0	0	0	0	0	0	0	0	0	0	0	0	0	0	0	0	0	0	0	0	0	0	0	0	0	0	0	0	0	0	0	0	0	0.00713628	0	0	0
Feng	ERR688510	M	Urban	Europe	Austria	66	controls	30.3	obesity	0	0	0	0	0	0	0	0	0	0	0	0	0	0	0	0	0	0	0	0	0	0	0	0	0	0	0	0	0	0	0	0	0	0	0	0	0	0	0	0
Feng	ERR688511	M	Urban	Europe	Austria	73	controls	29.7	overweight	0	0	0	0	0	0	0	0	0	0	0	0	0	0	0	0	0	0	0	0	0	0	0	0	0	0	0	0	0	0	0.00379939	0	0	0	0	0	0	0	0	0
Feng	ERR688512	M	Urban	Europe	Austria	67	advanced adenoma	27.14	overweight	0	0	0	0	0	0	0	0	0	0	0	0	0	0	0	0	0	0	0	0	0	0	0	0	0	0	0	0	0	0	0	0	0	0	0	0	0	0	0	0
Feng	ERR688513	M	Urban	Europe	Austria	73	carcinoma	17.9902	underweight	0	0	0	0	0	0	0	0	0	0	0	0	0.000109599	0	0	0	0	0	0	0	0	0	0	0	0	0	0	0	0	0	0.00359402	0	0	0	0	0	0	0	0	0
Feng	ERR688514	F	Urban	Europe	Austria	67	controls	30	overweight	0	0	0	0	0	0	0	0	0	0	0	0	0.000391369	0.000890848	0	0	0	0	0	0	0	0	0	0	0	0	0	0	0	0	0	0	0	0	0	0	0	0	0	0
Feng	ERR688515	M	Urban	Europe	Austria	65	carcinoma	28.0277	overweight	0	0	0	0	0	0.0016245	0	0	0	0	0	0	0.000276463	0.000147653	0	0	0	0	0	0	0	0	0	0	0	0	0	0	0	0	0.000339972	0	0	0.00060364	0	0	0.00343986	0	0.000383051	0
Feng	ERR688516	F	Urban	Europe	Austria	74	controls	28.3	overweight	0	0	0	0	0	0	0	0	0	0	0	0	0	0	0	0	0	0	0	0	0	0	0	0	0	0	0	0	0.011655	0	0	0	0	0	0	0	0	0	0	0
Feng	ERR688517	F	Urban	Europe	Austria	65	carcinoma	23.3067	normal	0	0	0	0	0	0.000282631	0	0	0	0.00045945	8.85992e-05	0.00025525	0.000273769	0.000267648	0.000358013	0.000487296	0	0	0	0.0005105	0	0	0.000417682	0	0	0.00111382	0	0.000591716	0.000230261	0.000255999	0.000292155	0	0.000904977	0.000250609	0	0.00020304	0.000391577	0.000364133	0.00028513	0.000185636
Feng	ERR688518	M	Urban	Europe	Austria	70	controls	22.64	normal	0	0	0	0	0	0	0	0	0	0	0	0	6.9659e-05	0	0	0	0	0	0	0	0	0	0	0	0	0	0	0	0	0	0	0	0	0	0	0	0.00741309	0	0	0
Feng	ERR688519	M	Urban	Europe	Austria	62	advanced adenoma	26.88	overweight	0	0	0	0	0	0	0	0	0	0	0	0	0.000243309	0	0	0	0	0	0	0	0	0	0	0	0	0	0	0	0	0	0	0	0	0	0	0	0	0	0	0
Feng	ERR688520	M	Urban	Europe	Austria	65	controls	29.06	overweight	0	0	0	0	0	0	0	0	0	0	0	0	0.000142286	0	0	0	0	0	0.0584795	0	0	0	0	0	0	0	0	0	0	0	0	0	0	0	0	0	0.0104776	0	0	0
Feng	ERR688521	M	Urban	Europe	Austria	67	carcinoma	29.4029	overweight	0	0	0	0	0	0	0	0	0	0	0	0	0	0	0	0	0	0	0	0	0	0	0	0	0	0	0	0	0	0	0.00484818	0	0	0	0	0	0	0	0	0
Feng	ERR688522	F	Urban	Europe	Austria	69	advanced adenoma	24.13	normal	0	0	0	0	0	0	0	0	0	0	0	0	0	0	0	0	0	0	0	0	0	0	0	0	0	0	0	0	0	0	0.00393617	0	0	0	0	0	0	0	0	0
Feng	ERR688523	M	Urban	Europe	Austria	67	controls	22.79	normal	0	0	0	0	0	0	0	0	0	0	0	0	0.000615782	0	0	0	0	0	0	0	0	0	0	0	0	0	0	0	0	0	0	0	0	0	0	0	0	0	0	0
Feng	ERR688524	M	Urban	Europe	Austria	62	advanced adenoma	30.1	obesity	0	0	0	0	0	0.000345178	0	0	0	0	0	0	0.000360641	2.25151e-05	0	0	0	0	0	0	0	0	0	0	0	0	0	0	0.00187427	0	0.000469813	0	0	8.79865e-05	0	0	0.00634518	0	0.000201655	0
Feng	ERR688525	M	Urban	Europe	Austria	82	carcinoma	30.4705	obesity	0	0.00237969	0	0	0	0.000195664	0.000925436	0	0	0	0.000504783	0	0.000316628	0.000290532	0.000283297	0	0	0	0	0	0	0	0	0	0	0	0	0	0	0.000153529	0.000297462	0	0	0.0002838	0	0.000363564	0.000308479	0	0.000364923	0.000396616
Feng	ERR688526	M	Urban	Europe	Austria	63	advanced adenoma	34.08	obesity	0	0	0	0	0	0	0	0	0	0	0	0	0.000124997	0	0	0	0	0	0	0	0	0	0	0	0	0	0	0	0	0	0	0	0	0	0	0	0.0083632	0	0	0
Feng	ERR688527	M	Urban	Europe	Austria	84	carcinoma	27.2817	overweight	0	0	0	0	0	0	0	0	0	0	0	0	0.000678111	0	0	0	0	0	0	0	0	0	0	0	0	0	0	0	0	0	0	0	0	0	0	0	0	0	0	0
Feng	ERR688528	F	Urban	Europe	Austria	68	controls	21.7	normal	0	0	0	0	0	0	0	0	0	0	0	0	0.0002217	0.000181382	0	0	0	0	0	0	0	0	0	0	0	0	0	0	0	0	0.000331296	0	0	0	0	0	0.00908304	0	0	0
Feng	ERR688529	M	Urban	Europe	Austria	63	controls	30.9	obesity	0	0	0	0	0	0	0	0	0	0	0	0	0.000393704	0	0	0	0	0	0	0	0	0	0	0	0	0	0	0	0	0	0	0	0	0	0	0	0.0101133	0	0	0
Feng	ERR688530	M	Urban	Europe	Austria	68	controls	22.2	normal	0	0	0	0	0	0.00012069	0	0	0	0	0	0	0.000206952	0.000377155	0.000738916	0	0	0	0	0.00172414	0	0	0	0	0	0	0	0	0	6.02521e-05	0.000279714	0	0	0.00025	0	0	0.000736351	0.000431034	0.000123996	0
Feng	ERR688531	M	Urban	Europe	Austria	62	advanced adenoma	35.43	obesity	0	0	0	0	0	0	0	0	0	0	0	0	0	0	0	0	0	0	0	0	0	0	0	0	0	0	0	0	0	0	0	0	0	0	0	0	0	0	0	0
Feng	ERR688532	M	Urban	Europe	Austria	72	controls	29.03	overweight	0	0	0	0	0	0	0	0	0	0	0	0	0.000304782	0	0	0	0	0	0	0	0	0	0	0	0	0	0	0	0	0	0	0	0	0	0	0	0.0204352	0	0	0
Feng	ERR688533	M	Urban	Europe	Austria	71	controls	29.04	overweight	0	0	0	0	0	0	0	0	0	0	0	0	0.000250792	0	0	0	0	0	0	0	0	0	0	0	0	0	0	0	0	0	0.00145912	0	0	0	0	0	0.00696176	0	0	0
Feng	ERR688534	F	Urban	Europe	Austria	86	carcinoma	20.5049	normal	0	0	0	0	0	0	0	0	0	0	0	0	0	0	0	0	0	0	0	0	0	0	0	0	0	0	0	0	0	0	0	0	0	0	0	0	0.0212766	0	0	0
Feng	ERR688535	M	Urban	Europe	Austria	63	controls	30.4	obesity	0	0	0	0	0	0	0	0	0	0	0	0	0	0	0	0	0	0	0	0	0	0	0	0	0	0	0	0	0	0	0	0	0	0	0	0	0.0129552	0	0	0
Feng	ERR688536	F	Urban	Europe	Austria	68	advanced adenoma	34.01	obesity	0	0	0	0	0	0	0	0	0	0	0	0	0.000112296	0	0	0	0	0	0	0	0	0	0	0	0	0	0	0	0	0	0	0	0	0	0	0	0.00801282	0	0	0
Feng	ERR688537	M	Urban	Europe	Austria	72	controls	31.8	obesity	0	0	0	0	0	0	0	0	0	0	0	0	0.000254203	0.000842561	0	0	0	0	0	0	0	0	0	0	0	0	0	0	0	0	0	0	0	0	0	0	0	0	0	0
Feng	ERR688538	F	Urban	Europe	Austria	68	advanced adenoma	24.84	normal	0	0	0	0	0	0	0	0	0	0	0	0	7.01853e-05	0	0	0	0	0	0	0	0	0	0	0	0	0	0	0	0	0.00082713	0	0	0	0	0	0	0	0	0	0
Feng	ERR688539	F	Urban	Europe	Austria	69	controls	30	overweight	0	0	0	0	0	0	0	0	0	0	0	0	0.000634719	0	0	0	0	0	0	0	0	0	0	0	0	0	0	0	0	0	0	0	0	0	0	0	0	0	0	0
Feng	ERR688540	M	Urban	Europe	Austria	71	advanced adenoma	27.04	overweight	0	0	0	0	0	0.000148348	0	0	0	0	0	0	0.000307714	0.000309511	0	0	0	0	0	0	0	0	0	0	0	0	0	0	0	0.000200601	0.000202054	0	0	0.000286207	0	0.000280962	0.000458905	0	0.000361787	0.000636847
Feng	ERR688541	F	Urban	Europe	Austria	84	carcinoma	31.2175	obesity	0	0	0	0	0	0	0	0	0	0	0	0	9.01144e-05	0	0	0	0	0	0	0	0	0	0	0	0	0	0	0	0	0	0	0	0	0	0	0	0.037037	0	0	0
Feng	ERR688542	M	Urban	Europe	Austria	63	advanced adenoma	30.77	obesity	0	0	0	0	0	0	0	0	0	0	0	0	0	0	0	0	0	0	0	0	0	0	0	0	0	0	0	0	0	0	0	0	0	0	0	0	0.00961538	0	0	0
Feng	ERR688543	M	Urban	Europe	Austria	67	controls	23.14	normal	0	0	0	0	0	0	0	0	0	0	0	0	0	6.25156e-05	0	0	0	0	0	0	0	0	0	0	0	0	0	0	0	0	0	0	0	0	0	0	0.0403747	0	0	0
Feng	ERR688544	F	Urban	Europe	Austria	66	controls	21.7	normal	0	0	0	0	0	0	0	0	0	0	0	0	0.00069993	0	0	0	0	0	0	0	0	0	0	0	0	0	0	0	0	0	0	0	0	0	0	0	0	0	0	0
Feng	ERR688545	F	Urban	Europe	Austria	72	advanced adenoma	27.43	overweight	0	0	0	0	0	0	0	0	0	0	0	0	0	0	0	0	0	0	0	0	0	0	0	0	0	0	0	0	0	0	0	0	0	0	0	0	0.0155971	0	0	0
Feng	ERR688546	F	Urban	Europe	Austria	78	advanced adenoma	31.24	obesity	0	0	0	0	0	0	0	0	0	0	0	0	0	0	0	0	0	0	0	0	0	0	0	0	0	0	0	0	0	0	0	0	0	0	0	0	0	0	0	0
Feng	ERR688547	M	Urban	Europe	Austria	60	carcinoma	26.6436	overweight	0	0.00149723	0	0	0	0.00027549	0.000573938	0	0	0	0.000136112	0.000199631	0.000276556	0.000300503	0.000374308	0	0	0.000224585	0	0.000548984	0	0	0	0	0	0	0	0	0	0.000147308	0.000326922	0	0	0.000285971	0	0.000318161	0.000399261	0.000155482	0.000278423	0.000361831
Feng	ERR688548	M	Urban	Europe	Austria	68	carcinoma	32.2494	obesity	0	0	0	0	0	0	0	0	0	0	0	0	0.000246835	0	0	0	0	0	0	0	0	0	0	0	0	0	0	0	0	0	0	0	0	0	0	0	0	0	0	0
Feng	ERR688549	F	Urban	Europe	Austria	69	advanced adenoma	24.4	normal	0	0	0	0	0	0	0	0	0	0	0	0	0.000176311	0	0	0	0	0	0	0	0	0	0	0	0	0	0	0	0	0	0	0	0	0	0	0	0.0326087	0	0	0
Feng	ERR688550	M	Urban	Europe	Austria	64	controls	29.3	overweight	0	0	0	0	0	0	0	0	0	0	0	0	0	0	0	0	0	0	0	0	0	0	0	0	0	0	0	0	0	0	0	0	0	0	0	0	0	0	0	0
Feng	ERR688551	M	Urban	Europe	Austria	65	controls	28.9	overweight	0	0	0	0	0	0	0	0	0	0	0	0	0.000663896	0	0	0	0	0	0	0	0	0	0	0	0	0	0	0	0	0	0	0	0	0	0	0	0.00368732	0	0	0
Feng	ERR688552	F	Urban	Europe	Austria	70	controls	31	obesity	0	0	0	0	0	0	0	0	0	0	0	0	0.000683772	0	0	0	0	0	0	0	0	0	0	0	0	0	0	0	0	0	0	0	0	0	0	0	0	0	0	0
Feng	ERR688553	F	Urban	Europe	Austria	84	carcinoma	27.7671	overweight	0	0	0	0	0	0	0	0	0	0.00422164	0	0	0.000236461	0.000340455	0	0	0	0	0	0	0	0	0	0	0	0	0	0	0	0	0	0	0	0.000114336	0	0.00868514	0	0	0	0
Feng	ERR688554	F	Urban	Europe	Austria	74	controls	28.5	overweight	0	0	0	0	0	0	0	0	0	0	0	0	0	0	0	0	0	0	0	0	0	0	0	0	0	0	0	0	0	0	0.00531915	0	0	0	0	0	0	0	0	0
Feng	ERR688555	M	Urban	Europe	Austria	77	advanced adenoma	25.7	overweight	0	0	0	0	0	0.000188119	0	0	0	0	0	0.000618812	0.000250938	0.000251018	0.00053041	0	0	0.000618812	0	0.00132013	0	0	0	0	0.00321782	0	0	0	0	0.000101139	0.000442385	0	0	0.000240924	0	0	0.000288779	0.000361767	0.000178014	0
Feng	ERR688556	F	Urban	Europe	Austria	70	controls	30	overweight	0	0	0	0	0	0.000199198	0	0	0	0.000534435	0	0.000809749	0.00026174	0.000291657	0.000694071	0	0	0.000425118	0	0.00101219	0	0	0.000566825	0	0	0	0	0	0	0.000108402	0.000418658	0	0	0.000264788	0	0	0.000263169	0.000298984	0.000388513	0
Feng	ERR688557	M	Urban	Europe	Austria	66	controls	29.98	overweight	0	0	0	0	0	0	0	0	0	0	0	0	0.000111469	0	0	0	0	0	0	0	0	0	0	0	0	0	0	0	0	0	0	0	0	0	0	0	0	0	0	0
Feng	ERR688558	M	Urban	Europe	Austria	74	carcinoma	26.3656	overweight	0	0.00173154	0	0	0	0.000192728	0.00144713	0	0	0	0.000599992	0	0.000274617	0.000292435	0.000250947	0	0	0	0.000627368	0	0	0	0	0	0	0	0	0	0	0.000251487	0.000305809	0	0	0.000294445	0	0.000290681	0.000327277	0.00021234	0.000336544	0.000393151
Feng	ERR688559	F	Urban	Europe	Austria	72	controls	28.7	overweight	0	0	0	0	0	0.00021125	0	0	0	0	0.000334963	0.00053222	0.000257992	0.000270897	0.00049128	0	0	0.0006141	0	0.00106444	0	0	0	0	0	0	0	0	0	0.000155836	0.000401125	0	0	0.000201425	0	0	0.00034799	0.000396803	0.00025237	0
Feng	ERR688560	F	Urban	Europe	Austria	84	advanced adenoma	24.7	normal	0	0	0	0	0	0	0	0	0	0	0	0	0	0	0	0	0	0	0	0	0	0	0	0	0	0	0	0	0	0	0	0	0	0	0	0	0	0	0	0
Feng	ERR688561	M	Urban	Europe	Austria	66	controls	30.02	obesity	0	0	0	0	0	0	0	0	0	0	0	0	0	0	0	0	0	0	0	0	0	0	0	0	0	0	0	0	0	0	0	0	0	0	0	0	0	0	0	0
Feng	ERR688562	F	Urban	Europe	Austria	69	controls	28.3	overweight	0	0	0	0	0	0	0	0	0	0	0	0	0	0	0	0	0	0	0	0	0	0	0	0	0	0	0	0	0	0	0	0	0	0	0	0	0	0	0	0
Feng	ERR688563	F	Urban	Europe	Austria	69	controls	22.4	normal	0	0	0	0	0	0	0	0	0	0	0	0	0	0	0	0	0	0	0	0	0	0	0	0	0	0	0	0	0	0	0	0	0	0	0	0	0.0210114	0	0	0
Feng	ERR688564	M	Urban	Europe	Austria	70	controls	31.25	obesity	0	0.00295286	0	0	0	0.000250484	0.00183281	0	0	0	0.000166619	0	0.000260957	0.000259278	0.000276376	0	0	0	0	0	0	0	0	0	0	0	0	0	0	0.00032846	0.000251307	0	0	0.00028103	0	0.000313953	0.00021213	0.000399458	0.000430305	0.000356379
Feng	ERR688565	M	Urban	Europe	Austria	66	controls	34.04	obesity	0	0	0	0	0	0	0	0	0	0	0	0	0.000333954	0	0	0	0	0	0	0	0	0	0	0	0	0	0	0	0	0	0	0	0	0	0	0	0.0100267	0	0	0
Feng	ERR688566	F	Urban	Europe	Austria	73	controls	32	obesity	0	0	0	0	0	0	0	0	0	0	0	0	0	0	0	0	0	0	0	0	0	0	0	0	0	0	0	0	0	0	0	0	0	0	0	0	0	0	0	0
Feng	ERR688567	M	Urban	Europe	Austria	54	carcinoma	27.3356	overweight	0	0.0031089	0	0	0	0.0002345	0.00082904	0	0	0	0.000411828	0	0.000328936	0.000218304	0.000253788	0	0	0	0	0	0	0	0	0	0	0	0	0	0	0.000275073	0.000322229	0	0	0.000299639	0	0.000325694	0.000281281	0.000751602	0.000302372	0.000340499
Feng	ERR688568	F	Urban	Europe	Austria	55	carcinoma	23.3355	normal	0	0	0	0	0	0	0	0	0	0	0	0	0	0	0	0	0	0	0	0	0	0	0	0	0	0	0	0	0	0	0	0	0	0	0	0	0	0	0	0
Feng	ERR688569	F	Urban	Europe	Austria	73	carcinoma	29.7521	overweight	0.00066984	0	0	0	0.00026441	0.000325754	0	0.000951877	0.000387802	0.000232681	0.000227553	0.000499442	0.000304168	0.000241665	0.00023671	0.000399553	0	0	0	0.000481814	0	0.000119866	0	0	0	0.00105764	0	0.000740349	0.000395938	0.000261567	0.000263848	0	0.000634585	0.000308126	0	0.000143957	0.000340796	0.000178985	0.000278416	0.000440684
Feng	ERR688570	F	Urban	Europe	Austria	64	carcinoma	24.0882	normal	0	0	0	0	0	0	0	0	0	0	0	0	0.00042253	0	0	0	0	0	0	0	0	0	0	0	0	0	0	0	0	0	0	0	0	0	0	0	0.0118007	0	0.000910049	0
Feng	ERR688571	M	Urban	Europe	Austria	63	carcinoma	25.8806	overweight	0	0	0	0	0	0	0	0	0	0	0	0	8.75662e-05	0.000259143	0	0	0	0	0	0	0	0	0	0	0	0	0	0	0	0	0	0	0	0	0	0	0	0	0.00114449	0
Feng	ERR688572	M	Urban	Europe	Austria	72	carcinoma	28.4082	overweight	0	0	0	0	0	0	0	0	0	0	0	0	0	0	0	0	0	0	0	0	0	0	0	0	0	0	0	0	0	0	0	0	0	0	0	0	0	0	0	0
Feng	ERR688573	M	Urban	Europe	Austria	46	carcinoma	30.8642	obesity	0	0	0	0	0	0	0	0	0	0	0	0	0.000642275	0	0	0	0	0	0	0	0	0	0	0	0	0	0	0	0	0	0	0	0	0	0	0	0.00452899	0	0	0
Feng	ERR688574	M	Urban	Europe	Austria	73	carcinoma	24.8163	normal	0	0	0	0	0	0	0	0	0	0	0	0	0.000664272	0	0	0	0	0	0	0	0	0	0	0	0	0	0	0	0	0.00076236	0	0	0	0	0	0	0.00383598	0	0	0
Feng	ERR688575	F	Urban	Europe	Austria	74	carcinoma	29.1749	overweight	0	0	0	0	0	0	0	0	0	0	0	0	0.000377255	2.87777e-05	0	0	0	0	0	0	0	0	0	0	0	0	0	0	0	0	0.000129517	0	0	0	0	0	0.0146935	0	8.05125e-05	0
Feng	ERR688576	M	Urban	Europe	Austria	58	carcinoma	27.7575	overweight	0	0	0	0	0	0	0	0	0	0	0	0	0.000243553	0	0	0	0	0	0	0	0	0	0	0	0	0	0	0	0	0	0	0	0	0	0	0	0.00863363	0	0	0
Feng	ERR688577	F	Urban	Europe	Austria	56	carcinoma	20.0692	normal	0	0	0	0	0	0	0	0	0	0	0	0	0.000289893	0	0	0	0	0	0	0	0	0	0	0	0	0	0	0	0	0	0	0	0	0	0	0	0.0249656	0	0	0
Feng	ERR688578	F	Urban	Europe	Austria	72	carcinoma	26.6728	overweight	0	0	0	0	0	0	0	0	0	0	0	0	0.000115397	0	0	0	0	0	0	0	0	0	0	0	0	0	0	0	0	0	0	0	0	0	0	0	0.0308951	0	0	0
Feng	ERR688579	F	Urban	Europe	Austria	52	carcinoma	27.1416	overweight	0	0	0	0	0	0	0	0	0	0	0	0	0.000457993	0	0	0	0	0	0	0	0	0	0	0	0	0	0	0	0	0	0	0	0	0	0	0	0.0147059	0	0	0
Feng	ERR688580	M	Urban	Europe	Austria	71	carcinoma	29.737	overweight	0	0	0	0	0	0.000569697	0	0	0	0.00230303	0	0	0.000257072	0.000414223	0.00121212	0	0	0	0	0	0	0	0.00242424	0	0	0	0	0	0	9.77517e-05	0.000161186	0	0	0.000230303	0	0.000656566	0	0	0.000498132	0
Feng	ERR688581	M	Urban	Europe	Austria	74	carcinoma	24.3375	normal	0	0	0	0	0	0	0	0	0	0.00334728	0.00161658	0	0.000128102	0	0	0	0	0	0	0	0	0	0	0	0	0	0	0	0	0	0	0	0	0	0	0	0.0292015	0	0.000128962	0
Feng	ERR688582	F	Urban	Europe	Austria	60	carcinoma	30.0781	obesity	0	0	0	0	0	0	0	0	0	0	0	0	0.000288757	0	0	0	0	0	0	0	0	0	0	0	0	0	0	0	0	0	0.00146565	0	0	0	0	0	0.00657895	0	0	0
Feng	ERR688583	M	Urban	Europe	Austria	43	carcinoma	22.68	normal	0	0	0	0	0	0	0	0	0	0	0	0	1.52485e-05	0	0	0	0	0	0	0	0	0	0	0	0	0	0	0	0	0	0	0	0	0	0	0	0.0381904	0	0	0
Feng	ERR688584	M	Urban	Europe	Austria	56	advanced adenoma	29.41	overweight	0	0	0	0	0	0	0	0	0	0	0	0	0	0.000226815	0	0	0	0	0	0	0	0	0	0	0	0	0	0	0	0	0	0	0	0	0	0	0	0	0	0
Feng	ERR688585	F	Urban	Europe	Austria	83	advanced adenoma	21.94	normal	0	0.00519802	0	0	0	0.000252475	0.00173267	0	0	0	0	0	0.000274225	0.000325375	0	0	0	0	0	0	0	0	0	0	0	0	0	0	0	0.000263494	0.000225142	0	0	0.000366337	0	0	0.000165017	0.000437928	0.000405195	0.000660066
Feng	ERR688586	M	Urban	Europe	Austria	67	advanced adenoma	33.23	obesity	0	0	0	0	0	0	0	0	0	0	0	0	0.00019445	0.000281463	0	0	0	0	0	0	0	0	0	0	0	0	0	0	0	0	0	0	0	0	0	0	0.0208649	0	0	0
Feng	ERR688587	F	Urban	Europe	Austria	60	advanced adenoma	30	overweight	0	0	0	0	0	0	0	0	0	0	0	0	0	0	0	0	0	0	0	0	0	0	0	0	0	0	0	0	0	0	0	0	0	0	0	0	0	0	0	0
Feng	ERR688588	M	Urban	Europe	Austria	67	advanced adenoma	28.34	overweight	0	0	0	0	0	0	0	0	0	0	0	0	0	0	0	0	0	0	0	0	0	0	0	0	0	0	0	0	0	0	0	0	0	0	0	0	0	0	0	0
Feng	ERR688589	M	Urban	Europe	Austria	69	advanced adenoma	21.46	normal	0	0.00163226	0	0	0.000198518	0.000232486	0.0013161	0	0	0	0.000140366	0	0.000298626	0.000271139	0.00026469	0	0	0	0.000275719	0	0	0	0	0	0	0	0	0	0	0.000227928	0.000316666	0	0	0.0003016	0	0.000365787	0.00020587	0.00034274	0.000314697	0.000404388
Feng	ERR688590	F	Urban	Europe	Austria	71	controls	29	overweight	0	0	0	0	0	0	0	0	0	0	0	0	0.000305729	0	0	0	0	0	0	0	0	0	0	0	0	0	0	0	0	0	0	0	0	0	0	0	0.0209424	0	0	0
Feng	ERR688591	M	Urban	Europe	Austria	64	controls	29.38	overweight	0	0	0	0	0	0	0	0	0	0	0	0	0.00081103	0	0	0	0	0	0	0	0	0	0	0	0	0	0	0	0	0	0	0	0	0	0	0	0	0	0	0
Feng	ERR688592	F	Urban	Europe	Austria	64	advanced adenoma	20.52	normal	0	0	0	0	0	0.000376841	0	0.000960395	0	0.000329278	0.000133042	0	0.00028293	0.000291549	0.000457331	0	0	0	0	0	0	0	0	0	0	0.00155493	0	0.000388731	0.000253291	0.000355046	0.000378514	0	0	0.000322571	0	0.00024391	0.000457331	0.000239219	0.000186065	0.000609775
Feng	ERR688593	M	Urban	Europe	Austria	64	controls	22.78	normal	0	0.00423206	0	0	0	0.000183389	0.000999236	0	0	0	0	0	0.000297182	0.000273036	0.000403053	0	0	0	0	0	0	0	0	0	0	0	0	0	0	0.000168751	0.000241055	0	0	0.00039029	0	0.000514313	0.000242462	0.00176336	0.000373204	0.000558397
Feng	ERR688594	F	Urban	Europe	Austria	68	controls	22.1	normal	0	0	0	0	0	0	0	0	0	0	0	0	0	0	0	0	0	0	0	0	0	0	0	0	0	0	0	0	0	0	0	0	0	0	0	0	0	0	0	0
Feng	ERR688595	M	Urban	Europe	Austria	63	controls	34.14	obesity	0	0	0	0	0	0	0	0	0	0	0	0	0	0	0	0	0	0	0	0	0	0	0	0	0	0	0	0	0	0	0	0	0	0	0	0	0	0	0	0
Feng	ERR688596	M	Urban	Europe	Austria	70	controls	31.6	obesity	0	0	0	0	0	0	0	0	0	0	0	0	0.000157993	0	0	0	0	0	0	0	0	0	0	0	0	0	0	0	0	0	0	0	0	0	0	0	0.0200216	0	0	0
Feng	ERR688597	F	Urban	Europe	Austria	61	advanced adenoma	22.8	normal	0	0	0	0	0	0	0	0	0	0	0	0	0.000504921	0	0	0	0	0	0	0	0	0	0	0	0	0	0	0	0	0	0	0	0	0	0	0	0	0	0	0
Feng	ERR688598	F	Urban	Europe	Austria	74	controls	28.5	overweight	0	0	0	0	0	0	0	0	0	0	0	0	0	0	0	0	0	0	0	0	0	0	0	0	0	0	0	0	0	0	0	0	0	0	0	0	0	0	0	0
Feng	ERR688599	M	Urban	Europe	Austria	63	controls	30.4	obesity	0	0	0	0	0	0	0	0	0	0	0	0	0	0	0	0	0	0	0	0	0	0	0	0	0	0	0	0	0	0	0	0	0	0	0	0	0	0	0	0
Feng	ERR688600	F	Urban	Europe	Austria	72	controls	30	overweight	0	0	0	0	0	0	0	0	0	0	0	0	0.000505916	0	0	0	0	0	0	0	0	0	0	0	0	0	0	0	0	0	0	0	0	0	0	0	0.0073687	0	0.000969035	0
Feng	ERR688601	F	Urban	Europe	Austria	62	advanced adenoma	32.8	obesity	0	0	0	0	0	0	0	0	0	0	0	0	0.000264056	0	0	0	0	0	0	0	0	0	0	0	0	0	0	0	0	0	0	0	0	0	0	0	0	0	0	0
Feng	ERR688602	M	Urban	Europe	Austria	63	advanced adenoma	27.4	overweight	0	0	0	0	0	0	0	0	0	0	0	0	0	0	0	0	0	0	0	0	0	0	0	0	0	0	0	0	0	0	0	0	0	0	0	0	0	0	0	0
Feng	ERR688603	F	Urban	Europe	Austria	71	controls	29	overweight	0	0	0	0	0	0	0	0	0	0	0	0	0.000360458	0	0	0	0	0	0	0	0	0	0	0	0	0	0	0	0	0	0	0	0	0	0	0	0	0	0	0
Feng	ERR688604	F	Urban	Europe	Austria	52	advanced adenoma	32.8	obesity	0	0	0	0	0	0.000160597	0	0	0	0.00108976	0	0	0.000306782	0.000221445	0.000573559	0.00248542	0	0	0	0	0	0	0	0	0	0	0	0	0	0.000366954	0.000242542	0	0.00344135	0.000229424	0	0.000788644	0.000454067	0	0.000229816	0
Feng	ERR688605	M	Urban	Europe	Austria	65	controls	31.22	obesity	0	0.00163428	0	0	0	0.000239695	0.00111979	0	0	0	0.000305396	0.000242116	0.000266048	0.000283913	0.000415056	0	0	0.000257248	0	0.000635555	0	0	0	0	0	0	0	0	0	0.00019135	0.000418713	0	0	0.000309303	0	0.000249682	0.00018537	0.000202539	0.000300365	0.000348042
Feng	ERR688606	F	Urban	Europe	Austria	68	controls	22.4	normal	0	0	0	0	0	0	0	0	0	0	0	0	0.00081103	0	0	0	0	0	0	0	0	0	0	0	0	0	0	0	0	0	0	0	0	0	0	0	0	0	0	0
Feng	ERR688607	M	Urban	Europe	Austria	72	controls	31.8	obesity	0	0	0	0	0	0	0	0	0	0	0	0	0	0	0	0	0	0	0	0	0	0	0	0	0	0	0	0	0	0	0	0	0	0	0	0	0	0	0	0
Feng	ERR688608	M	Urban	Europe	Austria	65	controls	22.03	normal	0	0	0	0	0	0	0	0	0	0	0	0	0.000320371	0	0	0	0	0	0	0	0	0	0	0	0	0	0	0	0	0	0.00198758	0	0	0	0	0	0	0	0	0
Feng	ERR688609	M	Urban	Europe	Austria	64	advanced adenoma	29.3	overweight	0	0	0	0	0	0	0	0	0	0	0	0	0.000130929	0	0	0	0	0	0	0	0	0	0	0	0	0	0	0	0	0	0.00333938	0	0	0	0	0	0	0	0.00101358	0
Feng	ERR688610	F	Urban	Europe	Austria	70	controls	22.67	normal	0.00169731	0	0	0	0	0.000405941	0	0	0	0.000438472	0	0.000271099	0.000262868	0.000289017	0.000404122	0	0	0	0	0.00108439	0	0	0.000612918	0	0	0.00120226	0	0.000565771	8.70417e-05	0.000350565	0.000261443	0	0	0.000240453	0	0.000330033	0.00051273	0.000223044	0.00033084	0
Feng	ERR688611	F	Urban	Europe	Austria	78	advanced adenoma	24	normal	0	0.00185223	0	0	0	0.000170817	0	0	0	0	0.000327415	0.000291555	0.000283418	0.000265968	0.000514509	0	0	0.000291555	0	0.00058311	0	0	0	0	0	0	0	0	0	0.000189207	0.000292832	0	0	0.000298415	0	0.00026583	0.000214379	0.000379945	0.000317163	0.000274405
Feng	ERR688612	F	Urban	Europe	Austria	75	controls	31	obesity	0	0	0	0	0	0	0	0	0	0	0	0	0	0	0	0	0	0	0	0	0	0	0	0	0	0	0	0	0	0	0	0	0	0	0	0	0	0	0	0
Feng	ERR688613	M	Urban	Europe	Austria	71	advanced adenoma	24.8	normal	0	0	0	0	0	0	0	0	0	0	0	0	0.000413791	0	0	0	0	0	0	0	0	0	0	0	0	0	0	0	0	0	0	0	0	0	0	0	0	0	0	0
Feng	ERR688614	M	Urban	Europe	Austria	70	controls	23.67	normal	0	0	0	0	0	0	0	0	0	0	0	0	0.00033717	0	0	0	0	0	0	0	0	0	0	0	0	0	0	0	0	0	0	0	0	0	0	0	0	0	0	0
Feng	ERR688615	M	Urban	Europe	Austria	58	advanced adenoma	21.7	normal	0	0	0	0	0	0	0	0	0	0	0	0	0	0	0	0	0	0	0	0	0	0	0	0	0	0	0	0	0	0	0	0	0	0	0	0	0	0	0	0
Feng	ERR688616	M	Urban	Europe	Austria	63	controls	31.17	obesity	0	0	0	0	0	0	0	0	0	0	0	0	0.00055356	0	0	0	0	0	0	0	0	0	0	0	0	0	0	0	0	0	0	0	0	0	0	0	0	0	0	0
Feng	ERR688617	F	Urban	Europe	Austria	70	controls	22.8	normal	0	0	0	0	0	0	0	0	0	0	0	0	0.000437213	0	0	0	0	0	0	0	0	0	0	0	0	0	0	0	0	0	0.00108964	0	0	0	0	0	0	0	0	0
Feng	ERR688618	F	Urban	Europe	Austria	47	carcinoma	25.7812	overweight	0	0	0	0	0	0.000290231	0	0.000906971	0.000863782	0.000362788	0	0	0.000294092	0.00023545	0.000370192	0	0	0	0	0	0	0.00027641	0	0	0	0.00164119	0	0.000734214	0.000225912	0.000240559	0.000216864	0	0.0019867	0.000328237	0	0.00023754	0.000529066	0.000352157	0.000250852	0.000331116
Feng	ERR688619	F	Urban	Europe	Austria	67	controls	22.58	normal	0	0	0	0	0	0	0	0	0	0	0	0	0.000739257	0	0	0	0	0	0	0	0	0	0	0	0	0	0	0	0	0	0	0	0	0	0	0	0	0	0	0
Feng	ERR688620	M	Urban	Europe	Austria	80	advanced adenoma	26.47	overweight	0	0	0	0	0	0	0	0	0	0	0	0	0.00050979	0.000184332	0	0	0	0	0	0	0	0	0	0	0	0	0	0	0	0	0	0	0	0	0	0	0	0	0	0
Feng	ERR688621	F	Urban	Europe	Austria	75	advanced adenoma	30.12	obesity	0	0	0	0	0	0	0	0	0	0	0	0	0	0	0	0	0	0	0	0	0	0	0	0	0	0	0	0	0	0.00230817	0	0	0	0	0	0	0	0	0	0
Feng	ERR688622	F	Urban	Europe	Austria	62	controls	22.1	normal	0	0	0	0	0	0	0	0	0	0	0	0	0.000112094	0	0	0	0	0	0	0	0	0	0	0	0	0	0	0	0	0	0	0	0	0.000650407	0	0	0	0	0	0
Feng	ERR688623	M	Urban	Europe	Austria	48	advanced adenoma	25.61	overweight	0	0	0	0	0	0.00011862	0	0	0	0	0	0	0.000289633	0.000302927	0.000410804	0	0	0	0	0	0	0	0	0	0	0	0	0	0	0.000239636	0.000254294	0	0	0.000342679	0	0.000599089	0.000232147	0	0.000336065	0.000479272
Feng	ERR688624	M	Urban	Europe	Austria	68	controls	29.8	overweight	0.0342742	0	0	0	0	0	0	0	0	0.00564516	0	0	0.00028615	0.000463384	0	0	0	0	0	0	0	0	0	0	0	0	0	0	0	0.000390219	0	0	0	0	0	0	0	0	0.0004557	0
Feng	ERR688625	F	Urban	Europe	Austria	56	advanced adenoma	22.8	normal	0	0	0	0	0	0	0	0	0	0	0.00791789	0	0.000487926	0	0	0	0	0	0	0	0	0	0	0	0	0	0	0	0	0	0	0	0	0	0	0	0.00194892	0	0	0
Feng	ERR688626	F	Urban	Europe	Austria	70	advanced adenoma	25.2	overweight	0	0.0027857	0	0	0	0.000228292	0.00140418	0	0	0	0.000185302	0	0.000306602	0.000258078	0.000232951	0	0	0	0.000713412	0	0	0	0	0	0	0	0	0	0	0.000246206	0.000299604	0	0	0.00031209	0	0.00036803	0.000175522	0.000355399	0.000297371	0.00039634
Feng	ERR688627	M	Urban	Europe	Austria	62	advanced adenoma	24.3	normal	0	0	0	0	0	0	0	0	0	0	0	0	0.000274812	5.95079e-05	0	0	0	0	0	0	0	0	0	0	0	0	0	0	0	0.000215815	0.000301439	0	0	0.000409288	0	0	0.00334514	0	0	0
Feng	ERR688628	F	Urban	Europe	Austria	63	advanced adenoma	30.47	obesity	0	0	0	0	0	0	0	0	0	0	0	0	0.000596796	0	0	0	0	0	0	0	0	0	0	0	0	0	0	0	0	0	0	0	0	0	0	0	0	0	0	0
Feng	ERR688629	M	Urban	Europe	Austria	77	advanced adenoma	37.56	obesity	0	0	0	0	0	0	0	0	0	0	0	0	0.000162206	7.134e-05	0	0	0	0	0	0	0	0	0	0	0	0	0	0	0	0	0	0	0	0	0	0	0.0237179	0	0	0
Feng	ERR688630	F	Urban	Europe	Austria	66	advanced adenoma	22.65	normal	0	0	0	0	0	0	0	0	0	0	0	0	0.000677492	3.95917e-05	0	0	0	0	0	0	0	0	0	0	0	0	0	0	0	0.000276126	0	0	0	0	0	0	0.00327291	0	0	0
Feng	ERR688631	F	Urban	Europe	Austria	70	advanced adenoma	29.38	overweight	0	0	0	0	0	0	0	0	0	0	0	0	0	0	0	0	0	0	0	0	0	0	0	0	0	0	0	0	0	0	0	0	0	0	0	0	0	0	0	0
Feng	ERR688632	F	Urban	Europe	Austria	74	advanced adenoma	24.13	normal	0	0	0	0	0	0.000327785	0	0.000576184	0	0.000332907	9.89408e-05	0	0.000278409	0.000262665	0.000356686	0.000576184	0	0	0	0.000362783	0	0.000396927	0	0	0	0.00115237	0	0.000544174	0.000275781	0.000270538	0.0002806	0	0.00102433	0.000288092	0	0.000197397	0.000440141	0.000221609	0.000272306	0.000192061
Feng	ERR688633	M	Urban	Europe	Austria	58	advanced adenoma	27.02	overweight	0	0	0	0	0	0	0	0	0	0	0	0	0.000165261	0	0	0	0	0	0	0	0	0	0	0	0	0	0	0	0	0	0	0	0	0.000216895	0	0	0.0214041	0	0	0
Feng	ERR688634	M	Urban	Europe	Austria	77	carcinoma	29.4118	overweight	0	0	0	0	0	0	0	0	0	0	0	0	0.0004444	0	0	0	0	0	0	0	0	0	0	0	0	0	0	0	0	0	0	0	0	0	0	0	0	0	0	0
Feng	ERR688635	M	Urban	Europe	Austria	52	carcinoma	25.7276	overweight	0	0	0	0	0	0.000197498	0	0	0	0.00289664	0	0	0.000247207	0.000375619	0	0	0	0	0	0	0	0	0	0	0	0	0	0	0.00607687	0.000955637	0.000287143	0	0	0.000131666	0	0	0.00131666	0	0.000238982	0
Feng	ERR688636	F	Urban	Europe	Austria	72	carcinoma	24.2188	normal	0	0	0	0	0	0	0	0	0	0	0	0	0.000189971	0	0	0	0	0	0	0	0	0	0	0	0	0	0	0	0	0	0	0	0	0	0	0	0.00938438	0	0	0
Feng	ERR688637	M	Urban	Europe	Austria	79	carcinoma	26.2976	overweight	0	0	0	0	0	0	0	0	0	0	0	0	0.00035905	0	0	0	0	0	0	0	0	0	0	0	0	0	0	0	0	0	0	0	0	0	0	0	0.016059	0	0	0
Feng	ERR688638	M	Urban	Europe	Austria	77	carcinoma	19.1571	normal	0	0	0	0	0	0	0	0	0	0	0	0	0	0.000964236	0	0	0	0	0	0	0	0	0	0	0	0	0	0	0.0401338	0	0	0	0	0	0	0	0	0	0	0
Feng	ERR688639	M	Urban	Europe	Austria	64	carcinoma	29.0688	overweight	0	0	0	0	0	0	0	0	0	0	0	0	0.000189983	0	0	0	0	0	0	0	0	0	0	0	0	0	0	0	0	0	0	0	0	0	0	0	0.026252	0	0	0
Feng	ERR688640	F	Urban	Europe	Austria	72	carcinoma	27.1203	overweight	0	0	0	0	0	0	0	0	0	0	0	0	0	0	0	0	0	0	0	0	0	0	0	0	0	0	0	0	0	0	0	0	0	0	0	0	0	0	0	0
Feng	ERR688641	M	Urban	Europe	Austria	69	carcinoma	29.9383	overweight	0	0	0	0	0	0	0	0	0	0	0	0	0.000746895	0	0	0	0	0	0	0	0	0	0	0	0	0	0	0	0	0	0	0	0	0	0	0	0.00141808	0	0	0
Feng	ERR688642	M	Urban	Europe	Austria	66	carcinoma	22.5981	normal	0	0.00143546	0	0	0	0.000347585	0.00107659	0	0	0	0.000144478	0	0.000291881	0.000250957	0.000322245	0	0	0.000111077	0	0.000187976	0	0	0	0	0	0	0	0	0	0.000266805	0.000263149	0	0	0.000420042	0	0.00031187	0.000388769	6.3097e-05	0.000283369	0.00035032
Feng	ERR688643	F	Urban	Europe	Austria	72	carcinoma	23.8281	normal	0	0	0	0	0	0	0	0	0	0	0	0	0.000177413	0	0	0	0	0	0	0	0	0	0	0	0	0	0	0	0	0	0	0	0	0	0	0	0.0325521	0	0	0
Feng	ERR688644	M	Urban	Europe	Austria	65	carcinoma	29.7406	overweight	0	0	0	0	0	0	0	0	0	0	0	0	0.000373747	3.25182e-05	0	0	0	0	0	0	0	0	0	0	0	0	0	0	0.00212691	0	0.000104177	0	0	0.000207373	0	0	0.00816052	0	0	0
Feng	ERR688645	F	Urban	Europe	Austria	59	advanced adenoma	29.2	overweight	0	0	0	0	0	0	0	0	0	0	0	0	0	0	0	0	0	0	0	0	0	0	0	0	0	0	0	0	0	0	0	0	0	0	0	0	0	0	0	0
Feng	ERR688646	M	Urban	Europe	Austria	46	controls	23.15	normal	0	0	0	0	0	0	0	0	0	0	0	0	0.000397494	0	0	0	0	0	0	0	0	0	0	0	0	0	0	0	0	0	0	0	0	0	0	0	0.0173993	0	0	0
Feng	ERR688647	M	Urban	Europe	Austria	63	carcinoma	33.564	obesity	0	0	0	0	0	0	0	0	0	0	0	0	0.000479899	0	0	0	0	0	0	0	0	0	0	0	0	0	0	0	0	0.000954381	0	0	0	0.00086785	0	0	0.00345168	0	0	0
Feng	ERR688648	M	Urban	Europe	Austria	46	controls	28.74	overweight	0	0	0	0	0	0	0	0	0	0	0	0	2.45767e-05	0	0	0	0	0	0	0	0	0	0	0	0	0	0	0	0	0	0	0	0	0	0	0	0.040404	0	0	0
Feng	ERR688649	F	Urban	Europe	Austria	45	carcinoma	22.1453	normal	0	0	0	0	0	0	0	0	0	0	0	0	3.58725e-05	0	0	0	0	0	0	0	0	0	0	0	0	0	0	0	0	0	0	0	0	0	0	0	0.0352564	0	0	0
Feng	ERR688650	M	Urban	Europe	Austria	72	carcinoma	24.3375	normal	0	0	0	0	0	0	0	0	0	0	0	0	0.000185555	3.45952e-05	0	0	0	0	0	0	0	0	0	0	0	0	0	0	0	0	0	0	0	0	0	0	0.0270099	0	0	0
Feng	ERR688651	F	Urban	Europe	Austria	77	carcinoma	23.4952	normal	0	0	0	0	0	0	0	0	0	0	0	0	0	0	0	0	0	0	0	0	0	0	0	0	0	0	0	0	0	0	0	0	0	0	0	0	0.00725655	0	0	0
Feng	ERR710424	M	Urban	Europe	Austria	63	advanced adenoma	25.6489	overweight	0	0.00563698	0	0	0	0.000248027	0	0	0	0	0.000614943	0	0.000286497	0.000261392	0.00182531	0	0	0	0	0	0	0	0	0	0	0	0	0	0	0.000125266	0.000151919	0	0	0.000390831	0	0	0.000610673	0	0.000388668	0.000876863
Feng	ERR710425	F	Urban	Europe	Austria	56	advanced adenoma	43.5799	obesity	0	0	0	0	0	0	0	0	0	0	0	0	0	0	0	0	0	0	0	0	0	0	0	0	0	0	0	0	0	0	0	0	0	0	0	0	0.0202991	0	0.00175623	0
Feng	ERR710426	M	Urban	Europe	Austria	55	controls	27.7634	overweight	0	0	0	0	0	0	0	0	0	0	0	0	0.000526643	0	0	0	0	0	0	0	0	0	0	0	0	0	0	0	0	0	0	0	0	0	0	0	0	0	0	0
Feng	ERR710427	M	Urban	Europe	Austria	70	controls	28.7197	overweight	0	0	0	0	0	0	0	0	0	0	0	0	0.00017624	7.70754e-05	0	0	0	0	0	0	0	0	0	0	0	0	0	0	0	0	0	0	0	0	0	0	0.0234742	0	0	0
Feng	ERR710428	F	Urban	Europe	Austria	73	controls	26.5625	overweight	0	0	0	0	0	0	0	0	0	0	0	0	0.00052217	0	0	0	0	0	0	0	0	0	0	0	0	0	0	0	0	0	0	0	0	0	0	0	0.0109589	0	0	0
Feng	ERR710429	M	Urban	Europe	Austria	68	controls	23.5294	normal	0	0	0	0	0	0	0	0	0	0	0	0	0.000289886	0.000291489	0	0	0	0	0	0	0	0	0	0	0	0	0	0	0	0	0	0	0	0	0	0	0.0133869	0	0	0
Feng	ERR710430	M	Urban	Europe	Austria	78	controls	31.2213	obesity	0	0	0	0	0	0	0	0	0	0	0	0	0	0	0	0	0	0	0	0	0	0	0	0	0	0	0	0	0	0	0	0	0	0	0	0	0	0	0	0
Feng	ERR710431	F	Urban	Europe	Austria	68	advanced adenoma	27.5482	overweight	0	0	0	0	0	0	0	0	0	0	0	0	0.000321837	0	0	0	0	0	0	0	0	0	0	0	0	0	0	0	0	0	0	0	0	0	0	0	0.0165344	0	0	0
Feng	ERR710432	F	Urban	Europe	Austria	43	controls	22.6474	normal	0.00121944	0	0	0	0.000471149	0.000433457	0	0	0	0.000498864	0	0.000277146	0.000271168	0.000285416	0.000348413	0.000535817	0	0	0	0.000923822	0	0	0.000535817	0	0	0.000886869	0	0.000471149	0.000243036	0.000324828	0.000261815	0	0.000831439	0.000300057	0	0.000304861	0.000609722	0.000170552	0.000277526	0.00015705
Li	MH0192_101007			Europe	Danish					0	0	0	0	0	0	0	0	0	0	0	0	0.00081103	0	0	0	0	0	0	0	0	0	0	0	0	0	0	0	0	0	0	0	0	0	0	0	0	0	0	0
Li	MH0221_101031			Europe	Danish					0	0	0	0	0	0	0	0	0	0	0	0	0.00081103	0	0	0	0	0	0	0	0	0	0	0	0	0	0	0	0	0	0	0	0	0	0	0	0	0	0	0
Li	MH0222_101031			Europe	Danish					0	0	0	0	0	0	0	0	0	0	0	0	0.000159266	0	0	0	0	0	0	0	0	0	0	0	0	0	0	0	0	0	0	0	0	0	0	0	0.0213998	0	0	0
Li	MH0234_101031			Europe	Danish					0	0	0	0	0	0	0	0	0	0	0	0	8.59887e-05	0	0	0	0	0	0	0	0	0	0	0	0	0	0	0	0	0	0	0	0	0	0	0	0.0291165	0	0	0
Li	MH0238_101031			Europe	Danish					0	0	0	0	0	0	0	0	0	0	0	0	0.000149199	4.75502e-05	0	0	0	0	0	0	0	0	0	0	0	0	0	0	0	0	0	0	0	0	0	0	0.00452044	0	0	0
Li	MH0245_101031			Europe	Danish					0	0	0	0	0	0	0	0	0	0	0	0	0.000467694	0	0	0	0	0	0	0	0	0	0	0	0	0	0	0	0	0	0	0	0	0	0	0	0.0127778	0	0.000799087	0
Li	MH0246_101007			Europe	Danish					0	0	0	0	0	0	0	0	0	0	0	0	0.000536879	0	0	0	0	0	0	0	0	0	0	0	0	0	0	0	0	0	0	0	0	0	0	0	0	0	0	0
Li	MH0252_101031			Europe	Danish					0	0	0	0	0	0	0	0	0	0	0.00206319	0	0.000507325	5.43354e-05	0	0	0	0	0	0	0	0	0	0	0	0	0	0	0	0.000701594	0	0	0	0.000756501	0	0	0.00165485	0	0	0
Li	MH0259_101007			Europe	Danish					0	0	0	0	0	0	0	0	0	0	0	0	0.000140533	6.1031e-05	0	0	0	0	0	0	0	0	0	0	0	0	0	0	0	0.000729567	0.000244303	0	0	0.000570633	0	0	0.0113083	0	0	0
Li	MH0260_101031			Europe	Danish					0	0	0	0	0	0	0	0	0	0	0	0	0.000416257	0	0	0	0	0	0	0	0	0	0	0	0	0	0	0	0	0	0	0	0	0	0	0	0.0151766	0	0	0
Li	MH0261_101007			Europe	Danish					0	0	0	0	0	0	0	0	0	0	0	0	0	0	0	0	0	0	0	0	0	0	0	0	0	0	0	0	0	0	0	0	0	0	0	0	0	0	0	0
Li	MH0262_101031			Europe	Danish					0	0	0	0	0	0.000175593	0	0	0	0	0.00399074	0	0.000289806	0.000552267	0	0	0	0	0	0	0	0	0	0	0	0	0	0	0	0	0.0001401	0	0	0	0	0	0.00164618	0	0.000493103	0
Li	MH0264_101031			Europe	Danish					0	0	0	0	0	0	0	0	0	0	0	0	0.000707494	0	0	0	0	0	0	0	0	0	0	0	0	0	0	0	0	0	0	0	0	0	0	0	0	0	0	0
Li	MH0265_101031			Europe	Danish					0	0	0	0	0	0	0	0	0	0	0	0	0.000380447	4.39883e-05	0	0	0	0	0	0	0	0	0	0	0	0	0	0	0	0	0	0	0	0	0	0	0.00808081	0	0.00215857	0
Li	MH0266_101031			Europe	Danish					0	0	0	0	0	0	0	0	0	0	0	0	0.000200623	0	0	0	0	0	0	0	0	0	0	0	0	0	0	0	0	0	0	0	0	0	0	0	0.0219298	0	0	0
Li	MH0268_101031			Europe	Danish					0	0	0	0	0	0	0	0	0	0	0	0	6.20539e-05	0	0	0	0	0	0	0	0	0	0	0	0	0	0	0	0	0	0	0	0	0	0	0	0.0355872	0	0	0
Li	MH0270_101031			Europe	Danish					0	0	0	0	0	0	0	0	0	0	0	0	0.000211759	0.000151316	0.00392631	0	0	0	0	0	0	0	0	0	0	0	0	0	0	0	0	0	0	0	0	0	0.0147111	0	0.000702308	0
Li	MH0271_101205			Europe	Danish					0	0	0	0	0	0	0	0	0	0	0	0	0.000190043	0	0	0	0	0	0	0	0	0	0	0	0	0	0	0	0	0	0	0	0	0	0	0	0.0261276	0	0.000689453	0
Li	MH0280_101031			Europe	Danish					0	0	0	0	0	0	0	0	0	0	0	0	0.000629777	0.000282564	0	0	0	0	0	0	0	0	0	0	0	0	0	0	0	0	0	0	0	0	0	0	0	0	0	0
Li	MH0281_101031			Europe	Danish					0	0	0	0	0	0	0	0	0	0	0	0	0.000206391	0	0	0	0	0	0	0	0	0	0	0	0	0	0	0	0	0	0	0	0	0	0	0	0	0	0	0
Li	MH0283_101207			Europe	Danish					0	0	0	0	0	0	0	0	0	0	0	0	0.000138568	0.000790242	0	0	0	0	0	0	0	0	0	0	0	0	0	0	0	0	0	0	0	0	0	0	0	0	0	0
Li	MH0284_101031			Europe	Danish					0	0	0	0	0	0	0	0	0	0	0	0	7.96966e-05	0	0	0	0	0	0	0	0	0	0	0	0	0	0	0	0	0	0	0	0	0	0	0	0.0313102	0	0	0
Li	MH0290_101102			Europe	Danish					0	0	0	0	0	0	0	0	0	0	0	0	0.000450013	0	0	0	0	0	0	0	0	0	0	0	0	0	0	0	0	0	0	0	0	0	0	0	0.0094893	0	0	0
Li	MH0293_101007			Europe	Danish					0	0	0	0	0	0	0	0	0	0	0	0	0.000171463	8.36785e-05	0	0	0	0	0	0	0	0	0	0	0	0	0	0	0	0.000292875	0.000110384	0	0	0.000345871	0	0	0.00329658	0	0.00198994	0
Li	MH0297_101102			Europe	Danish					0	0	0	0	0	0	0	0	0	0	0	0	0.000181608	0	0	0	0	0	0	0	0	0	0	0	0	0	0	0	0	0	0	0	0	0	0	0	0.0301344	0	0	0
Li	MH0298_101102			Europe	Danish					0	0	0	0	0	0	0	0	0	0	0	0	9.58085e-05	0.000315713	0	0	0	0	0	0	0	0	0	0	0	0	0	0	0	0	0	0	0	0	0	0	0.014881	0	0.00099729	0
Li	MH0299_101007			Europe	Danish					0	0	0	0	0	0	0	0	0	0	0	0	2.02758e-05	0	0	0	0	0	0	0	0	0	0	0	0	0	0	0	0	0	0	0	0	0	0	0	0.0166667	0	0	0
Li	MH0301_101102			Europe	Danish					0	0	0	0	0	0	0	0	0	0	0	0	0.000263653	0	0	0	0	0	0	0	0	0	0	0	0	0	0	0	0	0	0	0	0	0	0	0	0.0281215	0	0	0
Li	MH0303_101007			Europe	Danish					0	0	0	0	0	0	0	0	0	0	0	0	0.000521715	0	0	0	0	0	0	0	0	0	0	0	0	0	0	0	0	0	0	0	0	0	0	0	0	0	0.000720981	0
Li	MH0308_101031			Europe	Danish					0	0	0	0	0	0	0	0	0	0	0.00121821	0	0.00051963	3.88367e-05	0	0	0	0	0	0	0	0	0	0	0	0	0	0	0	0	0	0	0	0.00094919	0	0	0.00663037	0	9.75196e-05	0
Li	MH0309_101007			Europe	Danish					0	0	0	0.00427308	0	0.000151048	0	0	0	0.000874491	0	0.000612806	0.000324879	0.000385074	0	0	0	0	0	0	0	0	0	0	0	0	0.00367684	0	0	5.34269e-05	0.000255835	0	0	0.000178211	0.000944052	0.000372652	0.000438902	0	0.000177648	0
Li	MH0310_101031			Europe	Danish					0	0	0	0	0	0	0	0	0	0	0	0	0.000142803	0	0	0	0	0	0	0	0	0	0	0	0	0	0	0	0	0	0	0	0	0	0	0	0.0283094	0	0	0
Li	MH0311_101007			Europe	Danish					0	0	0	0	0	0	0	0	0	0	0	0	9.96115e-05	0	0	0	0	0	0	0	0	0	0	0	0	0	0	0	0	0	0	0	0	0	0	0	0.0244321	0	0	0
Li	MH0314_101102			Europe	Danish					0	0	0	0	0	0	0	0	0	0	0	0	0.000245395	0	0	0	0	0	0	0	0	0	0	0	0	0	0	0	0	0.00108991	0	0	0	0.001059	0	0	0.0170197	0	0	0
Li	MH0315_101102			Europe	Danish					0	0	0	0	0	0	0	0	0	0	0	0	0.000422553	0.000304961	0	0	0	0	0	0	0	0	0	0	0	0	0	0	0	0	0	0	0	0	0	0	0	0	0	0
Li	MH0319_101031			Europe	Danish					0	0	0	0	0	0	0	0	0	0	0	0	0.000118099	0	0	0	0	0	0	0	0	0	0	0	0	0	0	0	0	0	0	0	0	0	0	0	0.0309559	0	0	0
Li	MH0323_101031			Europe	Danish					0	0	0	0	0	0	0	0	0	0	0	0	0.000418388	0	0	0	0	0	0	0	0	0	0	0	0	0	0	0	0	0	0	0	0	0	0	0	0.00611772	0	0.00231028	0
Li	MH0325_101007			Europe	Danish					0	0	0	0	0	0	0	0	0	0	0	0	0.000158329	7.22915e-05	0	0	0	0	0	0	0	0	0	0	0	0	0	0	0	0	0	0	0	0	0	0	0.0166003	0	0	0
Li	MH0326_101031			Europe	Danish					0	0	0	0	0	0	0	0	0	0	0.00113343	0	0.000247912	0.000320708	0	0	0	0	0	0	0	0.00292347	0.00243623	0	0	0	0	0	0	0.000466905	0.000185233	0.00601892	0	0.000441387	0	0.000609057	0	0.000496065	0.000100119	0.00107481
Li	MH0327_101007			Europe	Danish					0	0	0	0	0	0	0	0	0	0	0	0	0.000313442	0	0	0	0	0	0	0	0	0	0	0	0	0	0	0	0	0	0	0	0	0	0	0	0.0231481	0	0	0
Li	MH0328_101007			Europe	Danish					0	0	0	0	0	0	0	0	0	0	0	0	0.000523171	0	0	0	0	0	0	0	0	0	0	0	0	0	0	0	0	0	0.000284687	0	0	0	0	0	0.00680751	0	0	0
Li	MH0329_101031			Europe	Danish					0	0	0	0.0047452	0	0.000144419	0	0	0	0.000907778	0	0.000653325	0.000371799	0.000221288	0	0	0	0	0	0	0	0	0	0	0	0	0.0047452	0	0	3.54947e-05	0.00022058	0	0	0.000184306	0	0.000361048	0.000739289	0	0.000247293	0
Li	MH0330_101031			Europe	Danish					0	0	0	0	0	0.000209059	0	0	0	0	0	0	0.000284787	0.000224014	0	0	0	0	0	0	0	0	0	0	0	0	0	0	0	0.000453753	0.000179158	0	0	0.000495548	0	0	0.00161311	0	0.000350023	0.000903342
Li	MH0332_101031			Europe	Danish					0	0	0	0	0	0	0	0	0	0	0	0	0.000209298	0	0	0	0	0	0	0	0	0	0	0	0	0	0	0	0	0	0	0	0	0	0	0	0	0	0	0
Li	MH0334_101101			Europe	Danish					0	0	0	0	0	0	0	0	0	0	0	0	0.000117541	0	0	0	0	0	0	0	0	0	0	0	0	0	0	0	0	0	0	0	0	0	0	0	0.0322061	0	0	0
Li	MH0335_101101			Europe	Danish					0	0	0	0	0	0	0	0	0	0	0	0	2.71165e-05	0	0	0	0	0	0	0	0	0	0	0	0	0	0	0	0	0	0	0	0	0	0	0	0.0131712	0	0.00337261	0
Li	MH0336_101008			Europe	Danish					0	0	0	0	0	0	0	0	0	0	0	0.00147192	0.000640229	0	0	0	0	0	0	0	0	0	0	0	0	0	0	0	0	0	0.000115634	0	0	0	0	0	0.00509511	0	0	0
Li	MH0337_101008			Europe	Danish					0	0	0	0	0	0	0	0	0	0	0	0	0.00013591	0	0	0	0	0	0	0	0	0	0	0	0	0	0	0	0.00224184	0	0	0	0	0	0	0	0.0288403	0	0	0
Li	MH0338_101009			Europe	Danish					0	0	0	0	0	0	0	0	0	0	0	0	0.000294076	0.000346282	0	0	0	0	0	0	0	0	0	0	0	0	0	0	0.00499119	0	0	0	0	0	0	0	0.0136768	0	0	0
Li	MH0339_101009			Europe	Danish					0	0	0	0	0	0	0	0	0	0	0	0	0.00046778	8.01423e-05	0	0	0	0	0	0	0	0	0	0	0	0	0	0	0	0.00100571	0	0	0	0	0	0	0.00649519	0	0	0
Li	MH0340_101102			Europe	Danish					0	0	0	0	0	0	0	0	0	0	0	0	0.000363745	0	0	0	0	0	0	0	0	0	0	0	0	0	0	0	0	0	0	0	0	0	0	0	0.0214592	0	0	0
Li	MH0341_101009			Europe	Danish					0	0	0	0	0	0	0	0	0	0	0	0	9.49962e-06	0	0	0	0	0	0	0	0	0	0	0	0	0	0	0	0	0	0	0	0	0	0	0	0.0411786	0	0	0
Li	MH0342_101009			Europe	Danish					0	0	0	0	0	0	0	0	0	0	0	0	0.000133377	2.5276e-05	0	0	0	0	0	0	0	0	0	0	0	0	0	0	0	0	0	0	0	0	0	0	0.0338004	0	0	0
Li	MH0343_101009			Europe	Danish					0	0	0	0.00458631	0	0.000146762	0	0	0	0.000917263	0	0.000672659	0.000300696	0.00029922	0	0	0	0	0	0	0	0	0	0	0	0	0.00421941	0	0	6.50961e-05	0.000271276	0	0	0.00021892	0.00128417	0.00033633	0.0019339	0	0.000255074	0
Li	MH0345_101009			Europe	Danish					0	0	0	0	0	0	0	0	0	0	0	0	0	0	0	0	0	0	0	0	0	0	0	0	0	0	0	0	0	0	0	0	0	0	0	0	0.0267857	0	0	0
Li	MH0346_101009			Europe	Danish					0	0	0	0	0	0	0	0	0	0	0	0	0.000135402	0.000147689	0	0	0	0	0	0	0	0	0	0	0	0	0	0	0	0	0	0	0	0	0	0	0.0198751	0	0.00163357	0
Li	MH0347_101101			Europe	Danish					0	0	0	0	0	0	0	0	0	0	0	0	7.42299e-05	0	0	0	0	0	0	0	0	0	0	0	0	0	0	0	0	0	0	0	0	0	0	0	0.0353107	0	0	0
Li	MH0348_101101			Europe	Danish					0	0	0	0.00411879	0	0.000208108	0	0	0	0.000867115	0	0.000686466	0.000295895	0.000298945	0	0	0	0.000469687	0	0	0	0	0	0	0	0	0.00411879	0	0	8.62453e-05	0.000291729	0	0	0.000242792	0.00216779	0.000343233	0.00106583	0	0.000253898	0
Li	MH0349_101009			Europe	Danish					0	0	0	0	0	0	0	0	0	0	0	0	0.000280409	0.000246654	0	0	0	0	0	0	0	0	0	0	0	0	0	0	0	0	0	0	0	0	0	0	0.0166223	0	0	0
Li	MH0350_101009			Europe	Danish					0	0	0	0	0	0	0	0	0	0	0	0	0.000102936	0.000519923	0	0	0	0	0	0	0	0	0	0	0	0	0	0	0	0.000521553	0	0	0	0	0	0	0.0114524	0	0	0
Li	MH0351_101102			Europe	Danish					0	0	0	0	0	0	0	0	0	0	0.00501417	0	0.000239225	0	0	0	0	0	0	0	0	0	0	0	0	0	0	0	0	0	0	0	0	0	0	0	0.0229816	0	0	0
Li	MH0354_101101			Europe	Danish					0.00352526	0	0	0	0	0.000266353	0	0	0	0.00101841	0	0.000554903	0.000236828	0.000326545	0.000475631	0.000913957	0	0	0	0.00124037	0	0	0.0063977	0	0	0	0	0	0	0.000240072	0.000330233	0	0.00254602	0.000272882	0	0	0.000799713	0.000241044	0.000391696	0
Li	MH0355_101009			Europe	Danish					0	0	0	0	0	0	0	0	0	0	0	0	0.000302708	0.00014553	0	0	0	0	0	0	0	0	0	0	0	0	0	0	0	0.000776162	0	0	0	0	0	0	0.00880282	0	0.000566757	0
Li	MH0356_101101			Europe	Danish					0	0	0	0	0	0	0	0	0	0	0	0	0.000342243	0	0	0	0	0	0	0	0	0	0	0	0	0	0	0	0	0	0	0	0	0	0	0	0.0115248	0	0	0
Li	MH0357_101009			Europe	Danish					0	0	0.00888149	0	0	0.000310852	0	0	0	0.00183181	0.000706482	0.00115644	0.00030771	0.000160596	0	0	0	0	0	0	0	0	0	0	0	0	0	0.00180405	0	0.000232781	0.000233257	0	0	0.000281247	0	0	0	0	0.000243328	0
Li	MH0358_101009			Europe	Danish					0	0	0	0	0	0	0	0	0	0	0	0	0.000555002	0	0	0	0	0	0	0	0	0	0	0	0	0	0	0	0	0	0	0	0	0	0	0	0	0	0	0
Li	MH0359_101009			Europe	Danish					0	0	0	0	0	0	0	0	0	0	0	0	0.000337929	0	0	0	0	0	0	0	0	0	0	0	0	0	0	0	0	0	0	0	0	0	0	0	0.0235615	0	0	0
Li	MH0360_101009			Europe	Danish					0	0	0	0	0	0	0	0	0	0	0	0.0043881	0.000377242	0.000219209	0.00153235	0	0	0	0	0	0	0	0	0	0	0	0	0	0	0.000283103	9.07705e-05	0	0	0	0	0	0.00568828	0	0.000193691	0
Li	MH0361_101009			Europe	Danish					0	0	0	0	0	0	0	0	0	0	0	0	0.000258916	6.05512e-05	0	0	0	0	0	0	0	0	0.00519095	0	0	0	0	0	0	0.000155489	0	0	0	0	0	0	0.0222469	0	0	0
Li	MH0362_101009			Europe	Danish					0	0	0	0	0	0	0	0	0	0	0	0	0.000536763	0	0	0	0	0	0	0	0	0	0	0	0	0	0	0	0	0	0	0	0	0	0	0	0.0120948	0	0	0
Li	MH0363_101009			Europe	Danish					0	0	0	0	0	0	0	0	0.00482218	0	0	0	0.000219012	9.47909e-05	0	0	0	0.00150693	0	0	0	0	0	0	0	0	0	0	0	0.000505551	6.09185e-05	0	0	0.000253165	0	0	0.00778581	0	0.00111059	0
Li	MH0364_101111			Europe	Danish					0	0	0	0	0	0	0	0	0	0	0	0	0.000346544	0	0	0	0	0	0	0	0	0	0	0	0	0	0	0	0	0	0	0	0	0	0	0	0.0179533	0	0	0.00748055
Li	MH0365_101102			Europe	Danish					0	0	0	0	0	0	0	0	0	0	0	0	0.000245354	0	0	0	0	0	0	0	0	0	0	0	0	0	0	0	0	0	0	0	0	0	0	0	0.0262605	0	0	0
Li	MH0366_101111			Europe	Danish					0	0	0	0	0	0.000321199	0	0	0	0	0	0	0.000510584	0.000202908	0	0	0	0	0	0	0	0	0	0	0	0	0	0	0	0.000149663	0.000222106	0	0	0.000171306	0	0	0.00267666	0.000988305	0.000102666	0
Li	MH0367_101009			Europe	Danish					0	0	0	0	0	0	0	0	0	0	0	0	0.000366949	0.000101174	0.00190785	0	0	0	0	0	0	0	0	0	0	0	0	0	0	0.00146647	0	0	0	0.00102523	0	0	0.000455281	0	0	0
Li	MH0368_101009			Europe	Danish					0	0	0.00483559	0	0	0.0003804	0	0	0	0.00109607	0.000468906	0.000752203	0.000404469	0.00011439	0	0	0	0	0	0	0	0	0	0	0	0	0	0.00128949	0	0.000235713	0.000174904	0	0	0.000275091	0	0	0.0042983	0	0.000218595	0
Li	MH0369_101111			Europe	Danish					0	0	0	0	0	0	0	0	0	0	0	0	0.000298054	0	0	0	0	0	0	0	0	0	0	0	0	0	0	0	0	0	0	0	0	0.00045	0	0	0.0208333	0	0	0
Li	MH0370_101009			Europe	Danish					0	0	0	0	0	0	0	0	0	0	0	0	0.000261623	0	0	0	0	0	0	0	0	0	0	0	0	0	0	0	0	0	0	0	0	0	0	0	0.0282258	0	0	0
Li	MH0371_101009			Europe	Danish					0	0	0	0	0	0	0	0	0	0	0	0	0.000334991	8.13965e-05	0	0	0	0	0	0	0	0	0	0	0	0	0	0	0	0	0	0	0	0	0	0	0.014234	0	0	0
Li	MH0372_101009			Europe	Danish					0	0	0	0	0	0	0	0	0	0	0	0	9.04975e-05	0.000458503	0	0	0	0	0	0	0	0	0	0	0	0	0	0	0	0	0	0	0	0	0	0	0.0141693	0	0	0
Li	MH0373_101009			Europe	Danish					0	0	0	0	0	0	0	0	0	0	0	0	0.00040386	0	0	0	0	0	0	0	0	0	0	0	0	0	0	0	0	0	0	0	0	0	0	0	0.0195578	0	0	0
Li	MH0374_101009			Europe	Danish					0	0	0	0	0	0	0	0	0	0	0	0	0	0	0	0	0	0	0	0	0	0	0	0	0	0	0	0	0	0	0	0	0	0	0	0	0.0416667	0	0	0
Li	MH0375_101102			Europe	Danish					0	0	0	0	0	0	0	0	0	0	0	0	0.000499547	0	0	0	0	0	0	0	0	0	0	0	0	0	0	0	0	0	0	0	0	0	0	0	0	0	0	0
Li	MH0376_101009			Europe	Danish					0	0	0	0	0	0	0	0	0	0	0	0	0.000259208	0.000432137	0	0	0	0	0	0	0	0	0	0	0	0	0	0	0	0	0	0	0	0	0	0	0.0120773	0	0	0
Li	MH0377_101009			Europe	Danish					0	0	0	0	0	0	0	0	0	0	0	0	0.000267607	0	0	0	0	0	0	0	0	0	0	0	0	0	0	0	0	0	0	0	0	0	0	0	0.0143387	0	0	0
Li	MH0378_101009			Europe	Danish					0	0	0	0	0	0.0005	0	0	0	0	0	0	0.000166641	4.88281e-05	0	0	0	0	0	0	0	0	0	0	0	0	0	0	0	0	0.00010389	0	0	0.000130208	0	0	0.0078125	0	0.00283604	0
Li	MH0379_101009			Europe	Danish					0	0	0	0	0	0	0	0	0	0	0	0	0.00026	0.00025314	0	0	0	0	0	0	0	0.00222883	0	0	0	0	0	0	0	5.19261e-05	0.000167952	0.00557207	0	0.000200594	0	0.000464339	0.00897722	0.000371471	9.15956e-05	0.000928678
Li	MH0381_101102			Europe	Danish					0	0	0	0	0	0.000698254	0	0	0	0	0	0	0.000198207	0	0	0	0	0	0	0	0	0	0	0	0	0	0	0	0	0	0	0	0	0	0	0	0.0218204	0	0.000273289	0
Li	MH0382_101111			Europe	Danish					0	0	0	0	0	0	0	0	0	0	0	0	0.000299902	0.000574622	0	0	0	0	0	0	0	0	0	0	0	0	0	0	0	0.000726533	0	0	0	0	0	0	0	0	0	0
Li	MH0383_101009			Europe	Danish					0	0	0	0	0	0	0	0	0	0	0	0	0	0	0	0	0	0	0	0	0	0	0	0	0	0	0	0	0	0	0	0	0	0	0	0	0.0416667	0	0	0
Li	MH0384_101009			Europe	Danish					0	0	0	0	0	0	0	0	0	0	0	0	0.00025472	0	0	0	0	0	0	0	0	0	0	0	0	0	0	0	0	0	0	0	0	0.000552764	0	0	0.0125628	0	0	0
Li	MH0385_101009			Europe	Danish					0	0	0	0	0	0	0	0	0	0	0	0	0.000303002	0.000548008	0	0	0	0	0	0	0	0	0	0	0	0	0	0	0	0	0	0	0	0	0	0	0.00237696	0	0.000850418	0
Li	MH0386_101009			Europe	Danish					0	0	0	0	0	0	0	0	0	0	0	0	0.000131928	0.000129032	0	0	0	0	0	0	0	0	0	0	0	0	0	0	0	0	0	0	0	0	0	0	0.0155556	0	0	0
Li	MH0387_101009			Europe	Danish					0	0	0	0	0	0	0	0	0	0	0	0	5.55312e-05	2.81201e-05	0	0	0	0	0	0	0	0	0	0	0	0	0	0	0	0	0	0	0	0	0	0	0.0334601	0	0	0
Li	MH0388_101111			Europe	Danish					0	0	0	0	0	0	0	0	0	0	0	0	0.000161885	0	0	0	0	0	0	0	0	0	0	0	0	0	0	0	0	0	0	0	0	0	0	0	0.0247036	0	0.00067681	0
Li	MH0389_101101			Europe	Danish					0	0	0	0	0	0	0	0	0	0	0	0	0.000365113	0	0	0	0	0	0	0	0	0	0	0	0	0	0	0	0	0.00198389	0	0	0	0.000725707	0	0	0.00345941	0	0.000467573	0
Li	MH0390_101009			Europe	Danish					0	0	0	0	0	0	0	0	0	0	0.00156819	0	0.000317664	0.000591234	0	0	0	0	0	0	0	0	0	0	0	0	0	0	0	0	0	0	0	0.000101471	0	0	0.00465077	0	0.000423956	0
Li	MH0391_101009			Europe	Danish					0	0	0	0	0	0	0	0	0	0	0	0	0.000241863	0	0	0	0	0	0	0	0	0	0	0	0	0	0	0	0	0	0.000206904	0	0	0	0	0	0.0148568	0	0	0
Li	MH0392_101009			Europe	Danish					0	0	0	0	0	0	0	0	0	0	0	0	0.000288864	0.000583191	0	0	0	0	0.00440705	0	0	0	0	0	0	0	0	0	0	0	0	0	0	0	0	0	0.00350561	0	0.000987882	0
Li	MH0393_101101			Europe	Danish					0	0	0	0	0	0	0	0	0	0	0	0	0.000156343	0	0	0	0	0	0	0	0	0	0	0	0	0	0	0	0	0	0	0	0	0	0	0	0.0251004	0	0	0
Li	MH0394_101009			Europe	Danish					0	0	0	0	0	0	0	0	0	0	0	0	0.000444828	0	0	0	0	0	0	0	0	0	0	0	0	0	0	0	0	0	0	0	0	0	0	0	0.00774679	0	0.000818643	0
Li	MH0395_101009			Europe	Danish					0	0	0	0.00359636	0	7.19272e-05	0	0	0	0.000676962	0	0.000493618	0.000292877	0.000315193	0	0	0	0	0.00169241	0	0	0	0	0	0	0	0.00338481	0	0	3.18463e-05	0.000141784	0	0	9.44926e-05	0	0.000299697	0.00593223	0	0.000321673	0
Li	MH0396_101031			Europe	Danish					0	0	0	0	0	0.000834356	0	0	0	0	0	0	0.000201016	0.000180586	0	0	0	0	0	0	0	0	0	0	0	0	0	0	0	0	0.00018927	0	0	0.000253579	0	0	0.0148262	0	0.000210102	0
Li	MH0397_101101			Europe	Danish					0	0	0	0	0	0	0	0	0	0	0	0	0.000273065	0.000609026	0	0	0	0	0	0	0	0	0	0	0	0	0	0	0	0	0	0	0	0	0	0	0	0	0.0015647	0
Li	MH0398_101101			Europe	Danish					0	0	0	0	0	0	0	0	0	0	0	0	0.000167657	2.66901e-05	0	0	0	0	0	0	0	0	0	0	0	0	0	0	0	0.000175197	0	0	0	0	0	0	0.00891039	0	0.00216221	0
Li	MH0399_101031			Europe	Danish					0	0	0	0.00480013	0	0.000193661	0	0	0	0.000926922	0	0.0006345	0.000283119	0.000307684	0	0	0	0	0	0	0	0	0	0	0	0	0.00471737	0	0	4.98345e-05	0.000285261	0	0	0.000199178	0.000993131	0.000406908	0.00182764	0	0.000265855	0
Li	MH0400_101101			Europe	Danish					0	0	0	0	0	0	0	0	0	0	0	0	0.000172671	0.000351197	0	0	0	0	0	0	0	0	0	0	0	0	0	0	0	0	0	0	0	0	0	0	0	0	0.00234202	0
Li	MH0401_101102			Europe	Danish					0	0	0	0	0	0	0	0	0	0	0	0	0.000573655	0	0	0	0	0	0	0	0	0	0	0	0	0	0	0	0	0	0	0	0	0	0	0	0.0121951	0	0	0
Li	MH0402_101111			Europe	Danish					0	0	0	0	0	0.000146672	0	0	0	0	0.00440268	0	0.000321741	0.000525304	0	0	0	0	0	0	0	0	0	0	0	0	0	0	0	2.08299e-05	6.6241e-05	0	0	0.00013468	0	0	0.000368987	0.000149014	0.000707014	0
Li	O2.CD1-0_110821			Europe	Spanish					0	0	0	0	0	0	0	0	0	0	0	0	0.000247961	0	0	0	0	0	0	0	0	0	0	0	0	0	0	0	0	0	0	0	0	0	0	0	0.0211906	0	0	0
Li	O2.CD1-0-PT_110821			Europe	Spanish					0	0	0	0	0	0	0	0	0	0	0	0	1.38429e-05	0	0	0	0	0	0	0	0	0	0	0	0	0	0	0	0	0	0	0	0	0	0	0	0.0368139	0	0	0
Li	O2.CD2-0_110820			Europe	Spanish					0	0	0	0	0	0	0	0	0	0	0	0	0	0	0	0	0	0	0	0	0	0	0	0	0	0	0	0	0	0	0	0	0	0	0	0	0	0	0	0
Li	O2.CD2-0-PT_110821			Europe	Spanish					0	0	0	0	0	0	0	0	0	0	0	0	2.06575e-05	0	0	0	0	0	0	0	0	0	0	0	0	0	0	0	0	0	0	0	0	0	0	0	0.0406054	0	0	0
Li	O2.CD3-0-PT_110820			Europe	Spanish					0	0	0	0	0	0	0	0	0	0	0	0	0.000476091	0	0	0	0	0	0	0	0	0	0	0	0	0	0	0	0	0	0	0	0	0	0	0	0.0172075	0	0	0
Li	O2.UC11-1_111207			Europe	Spanish					0	0	0	0	0	0	0	0	0	0	0	0	0.000440076	0	0	0	0	0	0	0	0	0	0	0	0	0	0	0	0	0	0	0	0	0	0	0	0.0173611	0	0	0
Li	O2.UC1-1_111207			Europe	Spanish					0	0	0	0	0	0	0	0	0	0	0.00907276	0	0.000351824	0.000376934	0	0	0	0	0	0	0	0	0	0	0	0	0	0	0	0	0	0	0	0.000106454	0	0	0.00499002	0	0.000747364	0
Li	O2.UC12-1_111207			Europe	Spanish					0	0	0	0	0	0.000868263	0	0	0	0	0	0	0.000403087	7.84721e-05	0	0	0	0	0	0	0	0	0	0	0	0	0	0	0	0	0.000222958	0	0	0.000319361	0	0	0.00274451	0	0.0010356	0
Li	O2.UC13-1_111207			Europe	Spanish					0	0	0	0	0	0.000719424	0	0	0	0	0	0	5.54301e-05	0.000282838	0	0	0	0	0	0	0	0	0	0	0	0	0	0	0	0	0	0	0	0	0	0	0.00577038	0	0.00369567	0
Li	O2.UC14-1_111207			Europe	Spanish					0	0	0	0	0	0	0	0	0	0	0	0	0.000114051	0	0	0	0	0	0	0	0	0	0	0	0	0	0	0	0	0	0	0	0	0	0	0	0.0169271	0	0.00171233	0
Li	O2.UC15-0_100908			Europe	Spanish					0	0	0	0	0	0	0	0	0	0	0	0	0.000107244	0	0	0	0	0	0	0	0	0	0	0	0	0	0	0	0	0	0	0	0	0	0	0	0.0340909	0	0	0
Li	O2.UC15-1_111207			Europe	Spanish					0	0	0	0	0	0	0	0	0	0	0	0	0.000306562	0	0	0	0	0	0	0	0	0	0	0	0	0	0	0	0	0	0	0	0	0	0	0	0.0195375	0	0	0
Li	O2.UC15-2_100908			Europe	Spanish					0	0	0	0	0	0	0	0	0	0	0	0	0.000292665	0	0	0	0	0	0	0	0	0	0	0	0	0	0	0	0	0	0	0	0	0	0	0	0.0229358	0	0	0
Li	O2.UC16-1_111213			Europe	Spanish					0	0	0	0	0	0	0	0	0	0	0	0	7.28272e-05	0	0	0	0	0	0	0	0	0	0	0	0	0	0	0	0	0	0	0	0	0	0	0	0.00646259	0	0.00405368	0
Li	O2.UC17-1_111207			Europe	Spanish					0	0	0	0	0	0	0	0	0	0	0	0	9.06179e-05	0	0	0	0	0	0	0	0	0	0	0	0	0	0	0	0	0	0	0	0	0	0	0	0.0356921	0	0	0
Li	O2.UC18-1_111207			Europe	Spanish					0	0	0.00923788	0	0	0.000332564	0	0	0	0.00166282	0.000797817	0.0013087	0.000252487	0.000136892	0	0	0	0	0	0	0	0	0	0	0	0	0	0.00196305	0	0.000238397	0.000289912	0	0	0.000332564	0	0	0.00307929	0	0.000221456	0
Li	O2.UC19-1_111207			Europe	Spanish					0	0	0	0	0	0	0	0	0	0	0	0	4.02738e-05	0.000690455	0	0	0	0	0	0	0	0	0	0	0	0	0	0	0	0	0	0	0	0	0	0	0.0128425	0	0	0
Li	O2.UC20-1_111207			Europe	Spanish					0	0	0	0	0	0	0	0	0	0	0	0	6.40287e-05	0	0	0	0	0	0	0	0	0	0	0	0	0	0	0	0	0	0	0	0	0	0	0	0.0255848	0	0.00210286	0
Li	O2.UC21-1_111207			Europe	Spanish					0	0	0	0	0	0	0	0	0	0	0	0	0.000165746	0.000328021	0.00538549	0	0	0	0	0	0	0	0	0	0	0	0	0	0	0	0	0	0	0	0	0	0.0119461	0	0	0
Li	O2.UC2-1_111207			Europe	Spanish					0	0	0	0	0	0	0	0	0	0	0	0	6.18163e-05	0	0	0	0	0	0	0	0	0	0	0	0	0	0	0	0	0	0	0	0	0	0	0	0.00787602	0	0.00141998	0
Li	O2.UC22-1_111206			Europe	Spanish					0	0	0	0	0	0	0	0	0	0	0	0	0.000397891	0.000124542	0	0	0	0	0	0	0	0	0	0	0	0	0	0	0	0	0	0	0	0	0	0	0.0115637	0	0	0
Li	O2.UC23-1_111206			Europe	Spanish					0	0	0	0	0	0	0	0	0	0	0	0	0.000352622	0	0	0	0	0	0	0	0	0	0	0	0	0	0	0	0	0	0	0	0	0	0	0	0.0149457	0	0	0
Li	O2.UC24-1_111206			Europe	Spanish					0	0	0.00966962	0	0	0.000241741	0	0	0	0	0	0	0.000265006	0.000306237	0.000690687	0	0	0	0	0	0	0	0	0	0	0	0	0	0	5.19872e-05	0.000282888	0	0	0.000287403	0	0	0	0	0.000358747	0
Li	O2.UC26-1_111206			Europe	Spanish					0	0	0	0	0	0	0	0	0	0	0	0	1.36079e-05	0	0	0	0	0	0	0	0	0	0	0	0	0	0	0	0	0	0	0	0	0	0	0	0.0401985	0	0	0
Li	O2.UC27-1_111207			Europe	Spanish					0	0	0	0	0	0	0	0	0	0	0	0	8.09443e-05	0	0	0	0	0	0	0	0	0	0	0	0	0	0	0	0	0	0	0	0	0	0	0	0.0260926	0	0.00187652	0
Li	O2.UC28-0_100908			Europe	Spanish					0	0	0	0	0	0	0	0	0	0.00273271	0	0	0.000244486	0.000315074	0	0	0	0	0	0	0	0	0	0	0	0	0	0	0	0.000486672	6.8136e-05	0	0	7.9704e-05	0	0.00256191	0.00224167	0	0	0
Li	O2.UC28-1_111207			Europe	Spanish					0	0	0	0	0	0	0	0	0	0	0	0	0.000147639	0.000508926	0	0	0	0	0	0	0	0	0	0	0	0	0	0	0	0.000874308	0	0	0	0	0	0	0.0151699	0	0	0
Li	O2.UC28-2_100908			Europe	Spanish					0	0	0	0	0	9.45307e-05	0	0	0	0.00135044	0	0	0.000228359	0.000385937	0.000723449	0	0	0	0	0.00236327	0	0	0	0	0	0	0	0	0	0.000482818	0.000215496	0	0	0.000191312	0	0.00126604	0	0.00041552	0.000291362	0
Li	O2.UC29-1_111207			Europe	Spanish					0	0	0	0	0	0	0	0	0	0	0.00285714	0	0.000280385	0.000679724	0	0	0	0	0	0	0	0	0	0	0	0	0	0	0	0	0	0	0	0.00016	0	0	0.00357143	0	0.000587084	0
Li	O2.UC30-1_111207			Europe	Spanish					0	0	0	0	0	0	0	0	0	0	0	0	0.000100268	0	0	0	0	0	0	0	0	0	0	0	0	0	0	0	0	0	0	0	0	0	0	0	0.0286907	0	0	0
Li	O2.UC31-1_111207			Europe	Spanish					0	0	0	0	0	0	0	0	0	0	0	0	0.00042076	0	0	0	0	0	0	0	0	0	0	0	0	0	0	0	0	0	0	0	0	0	0	0	0.018797	0	0	0
Li	O2.UC3-1_111207			Europe	Spanish					0	0	0	0	0	0	0	0	0	0	0	0	9.96408e-05	0	0	0	0	0	0	0	0	0	0	0	0	0	0	0	0	0	0	0	0	0	0	0	0.0269841	0	0.00117417	0
Li	O2.UC32-1_111207			Europe	Spanish					0	0	0	0	0	0	0	0	0	0	0	0	0.000218648	0	0	0	0	0	0	0	0	0	0	0	0	0	0	0	0	0	0	0	0	0	0	0	0.023511	0	0	0
Li	O2.UC35-1_111207			Europe	Spanish					0	0	0	0	0	0	0	0	0	0	0	0	0.000381326	0	0.0037594	0	0	0	0	0	0	0	0	0	0	0	0	0	0	0	0	0	0	0	0	0	0.0197368	0	0	0
Li	O2.UC36-0_100902			Europe	Spanish					0	0	0	0	0	0	0	0	0	0	0	0	0.000589064	0	0	0	0	0	0	0	0	0	0	0	0	0	0	0	0	0	0	0	0	0	0	0	0.0114035	0	0	0
Li	O2.UC36-1_111207			Europe	Spanish					0	0	0	0	0	0	0	0	0	0	0	0	0.000499095	0	0	0	0	0	0	0	0	0	0	0	0	0	0	0	0	0	0	0	0	0	0	0	0.0160256	0	0	0
Li	O2.UC37-1_111207			Europe	Spanish					0	0	0	0	0	0	0	0	0	0	0	0	0.000149871	0	0	0	0	0	0	0	0	0	0	0	0	0	0	0	0	0	0	0	0	0	0	0	0.0130301	0	0.00131437	0
Li	O2.UC38-1_111207			Europe	Spanish					0	0	0	0	0	0	0	0	0	0	0	0	0.000424566	0	0	0	0	0	0	0	0	0	0	0	0	0	0	0	0	0	0	0	0	0	0	0	0.0111857	0	0.000149398	0
Li	O2.UC40-1_111207			Europe	Spanish					0	0	0	0	0	0	0	0	0	0.00174014	0	0	0.000208403	0.000280668	0.00331455	0	0	0	0	0	0	0	0	0	0	0	0	0	0	0	0	0	0	0.000139211	0	0	0.00193349	0	0.000933636	0
Li	O2.UC41-1_111207			Europe	Spanish					0	0	0	0	0	0	0	0	0	0	0	0	8.66485e-05	0.000103391	0	0	0	0	0	0	0	0	0	0	0	0	0	0	0	0	0	0	0	0	0	0	0.0298255	0	0	0
Li	O2.UC4-1_111207			Europe	Spanish					0	0	0	0	0	0	0	0	0	0	0	0	5.24669e-05	0.000108486	0.00310935	0	0	0	0	0	0	0	0	0	0	0	0	0	0	0	0	0	0	0	0	0	0.0123438	0	0.00252605	0
Li	O2.UC43-1_111206			Europe	Spanish					0	0	0	0	0	0	0	0	0	0	0	0	0.0003165	0	0	0	0	0	0	0	0	0	0	0	0	0	0	0	0	0	0	0	0	0	0	0	0.0254065	0	0	0
Li	O2.UC44-1_111206			Europe	Spanish					0	0	0	0	0	0	0	0	0	0	0	0	4.26858e-05	0	0	0	0	0	0	0	0	0	0	0	0	0	0	0	0	0	0	0	0	0	0	0	0.0142544	0	0	0
Li	O2.UC46-1_111206			Europe	Spanish					0	0	0	0	0	0	0	0	0	0	0	0	0.000282097	0	0	0	0	0	0	0	0	0	0	0	0	0	0	0	0	0	0	0	0	0	0	0	0.0167224	0	0	0
Li	O2.UC47-1_111206			Europe	Spanish					0	0	0	0	0	0	0	0	0	0	0	0	0.000489299	7.28972e-05	0	0	0	0	0	0	0	0	0	0	0	0	0	0	0	0	0	0	0	0	0	0	0.00284091	0	0.000127363	0
Li	O2.UC48-1_111213			Europe	Spanish					0	0	0	0	0	0	0	0	0	0	0	0	0.000255478	0.00014468	0	0	0	0	0	0	0	0	0	0	0	0	0	0	0	0	0	0	0	0	0	0	0.0155328	0	0	0
Li	O2.UC5-1_111207			Europe	Spanish					0	0	0	0	0	0	0	0	0	0	0	0	0.000115609	0	0	0	0	0	0	0	0	0	0	0	0	0	0	0	0	0	0	0	0	0	0	0	0.031284	0	0	0
Li	O2.UC6-0_100908			Europe	Spanish					0	0	0	0	0	0	0	0	0	0	0	0	0	0	0	0	0	0	0	0	0	0	0	0	0	0	0	0	0	0	0	0	0	0	0	0	0.0416667	0	0	0
Li	O2.UC6-1_111207			Europe	Spanish					0	0	0	0	0	0	0	0	0	0	0	0	0.000429369	0	0	0	0	0	0	0	0	0	0	0	0	0	0	0	0	0	0	0	0	0	0	0	0.0196078	0	0	0
Li	O2.UC6-2_100908			Europe	Spanish					0	0	0	0	0	0	0	0	0	0	0	0	0.000536879	0	0	0	0	0	0	0	0	0	0	0	0	0	0	0	0	0	0	0	0	0	0	0	0.0140845	0	0	0
Li	O2.UC7-0_111207			Europe	Spanish					0	0	0	0	0	0.000845666	0	0	0	0	0	0	6.68714e-05	0.00015771	0	0	0	0	0	0	0	0	0	0	0	0	0	0	0	0	0	0	0	0	0	0	0	0	0	0
Li	O2.UC7-1_111207			Europe	Spanish					0	0	0	0	0	0.000613027	0	0	0	0	0	0.00606641	0.000110313	0.000204703	0	0	0	0	0	0	0	0	0	0	0	0	0	0	0	0.000679768	0	0	0	0	0	0	0.0143678	0	0.000288668	0
Li	O2.UC8-0_100908			Europe	Spanish					0	0	0	0	0	0	0	0	0	0	0	0	6.35369e-05	0	0	0	0	0	0	0	0	0	0	0	0	0	0	0	0	0	0	0	0	0	0	0	0.0384025	0	0	0
Li	O2.UC8-1_111207			Europe	Spanish					0	0	0	0	0	0	0	0	0	0	0	0	0.000213245	0	0	0	0	0	0	0	0	0	0	0	0	0	0	0	0	0	0	0	0	0	0	0	0.0251437	0	0.00091521	0
Li	O2.UC8-2_100908			Europe	Spanish					0	0	0	0	0	0	0	0	0	0	0	0	0.000139699	0	0	0	0	0	0	0	0	0	0	0	0	0	0	0	0	0	0	0	0	0	0	0	0.0229266	0	0	0
Li	O2.UC9-1_111207			Europe	Spanish					0	0	0	0	0	0	0	0	0	0	0	0	0.000104909	0	0	0	0	0	0	0	0	0	0	0	0	0	0	0	0	0	0	0	0	0	0	0	0.034204	0	0	0
Li	V1.CD1-0-PN_101220			Europe	Spanish					0	0	0.00642674	0	0	0.000231362	0	0	0	0.00128535	0.000545299	0.00114253	0.000151503	9.06999e-05	0	0	0	0	0	0	0	0	0	0	0	0	0	0.00149957	0	0.000138209	0.000193714	0	0	0.000179949	0	0	0.00803342	0	0.00188694	0
Li	V1.CD1-0-PT_110820			Europe	Spanish					0	0	0	0	0	0	0	0	0	0	0	0	0.000186386	0	0	0	0	0	0	0	0	0	0	0	0	0	0	0	0	0	0	0	0	0	0	0	0.0269151	0	0	0
Li	V1.CD12-3_100902			Europe	Spanish					0	0	0	0	0	0	0	0	0	0	0	0	9.32218e-05	0	0	0	0	0	0	0	0	0	0	0	0	0	0	0	0	0	0	0	0	0	0	0	0.0368774	0	0	0
Li	V1.CD1-3-PN_101220			Europe	Spanish					0	0	0	0	0	0	0	0	0	0	0	0	2.56751e-05	0	0	0	0	0	0	0	0	0	0	0	0	0	0	0	0	0	0	0	0	0	0	0	0.0403476	0	0	0
Li	V1.CD20-0_100902			Europe	Spanish					0	0	0	0	0	0	0	0	0	0	0	0	0.000244254	0	0	0	0	0	0	0	0	0	0	0	0	0	0	0	0	0	0	0	0	0	0	0	0.0291181	0	0	0
Li	V1.CD2-0-PN_101220			Europe	Spanish					0	0	0	0	0	0	0	0	0	0	0	0	6.0938e-05	0	0	0	0	0	0	0	0	0	0	0	0	0	0	0	0	0	0	0	0	0	0	0	0.0375683	0	0	0
Li	V1.CD2-0-PT_110820			Europe	Spanish					0	0	0	0	0	0	0	0	0	0	0	0	4.52247e-05	0	0	0	0	0	0	0	0	0	0	0	0	0	0	0	0	0	0	0	0	0	0	0	0.0325279	0	0	0
Li	V1.CD3-0-PN_101220			Europe	Spanish					0	0	0	0	0	0	0	0	0	0	0	0	0.00081103	0	0	0	0	0	0	0	0	0	0	0	0	0	0	0	0	0	0	0	0	0	0	0	0	0	0	0
Li	V1.CD3-0-PT_110820			Europe	Spanish					0	0	0	0	0	0	0	0	0	0	0	0	0	0	0	0	0	0	0	0	0	0	0	0	0	0	0	0	0	0	0	0	0	0	0	0	0	0	0	0
Li	V1.CD32-0_100902			Europe	Spanish					0	0	0	0	0	0	0	0	0	0	0	0	0.00014349	0	0	0	0	0	0	0	0	0	0	0	0	0	0	0	0	0	0	0	0	0	0	0	0.0291667	0	0	0
Li	V1.CD32-4_100902			Europe	Spanish					0	0	0	0	0	0	0	0	0	0	0	0	0	0	0	0	0	0	0	0	0	0	0	0	0	0	0	0	0	0	0	0	0	0	0	0	0.0307765	0	0	0
Li	V1.CD3-3-PN_101220			Europe	Spanish					0	0	0	0	0	0	0	0	0	0	0	0	0.000120153	0	0	0	0	0	0	0	0	0	0	0	0	0	0	0	0	0	0	0	0	0	0	0	0.0354938	0	0	0
Li	V1.CD37-4_101218			Europe	Spanish					0	0	0	0	0	0	0	0	0	0	0	0	6.30445e-05	0	0	0	0	0	0	0	0	0	0	0	0	0	0	0	0	0	0	0	0	0	0	0	0.0271739	0	0.00184995	0
Li	V1.CD40-0_100902			Europe	Spanish					0	0	0	0	0	0	0	0	0	0	0	0	0.000261021	0	0	0	0	0	0	0	0	0	0	0	0	0	0	0	0	0	0	0	0	0	0	0	0.0177203	0	0	0
Li	V1.CD4-0-PN_101220			Europe	Spanish					0	0	0	0	0.0204057	0	0	0	0	0	0	0	0.000219646	0.000176081	0.00227377	0	0	0.00414915	0	0	0	0	0	0	0	0	0	0	0.00408113	0.00049588	0.000108541	0	0	0.000421717	0	0	0.00115632	0	0.000290711	0
Li	V1.CD4-0-PT_110820			Europe	Spanish					0	0	0	0	0	0	0	0	0	0	0	0	0	0	0	0	0	0	0	0	0	0	0	0	0	0	0	0	0	0	0	0	0	0	0	0	0	0	0	0
Li	V1.CD43-0_101218			Europe	Spanish					0	0	0	0	0	0	0	0	0	0	0	0	0.000242897	0	0	0	0	0	0	0	0	0	0	0	0	0	0	0	0	0	0	0	0	0	0	0	0.0232657	0	0	0
Li	V1.CD44-0_100902			Europe	Spanish					0	0	0	0	0	0	0	0	0	0	0	0	0	0	0	0	0	0	0	0	0	0	0	0	0	0	0	0	0	0	0	0	0	0	0	0	0.0416667	0	0	0
Li	V1.CD44-4_110821			Europe	Spanish					0	0	0	0	0	0	0	0	0	0	0	0	3.26421e-05	0	0	0	0	0	0	0	0	0	0	0	0	0	0	0	0	0	0	0	0	0	0	0	0.0399897	0	0	0
Li	V1.CD45-0_100902			Europe	Spanish					0	0	0	0	0	0	0	0	0	0	0	0	0.00081103	0	0	0	0	0	0	0	0	0	0	0	0	0	0	0	0	0	0	0	0	0	0	0	0	0	0	0
Li	V1.CD46-0_100902			Europe	Spanish					0	0	0	0	0	0	0	0	0	0	0	0	0.000578595	0	0	0	0	0	0	0	0	0	0	0	0	0	0	0	0	0	0	0	0	0	0	0	0.0105064	0	0	0
Li	V1.CD48-0_100902			Europe	Spanish					0	0	0	0	0	0	0	0	0	0	0	0	0.000333552	0	0	0	0	0	0	0	0	0	0	0	0	0	0	0	0	0	0	0	0	0	0	0	0.0240177	0	0	0
Li	V1.CD49-0_101218			Europe	Spanish					0	0	0	0	0	0	0	0	0	0	0	0	0.000159272	0	0	0	0	0	0	0	0	0	0	0	0	0	0	0	0	0	0	0	0	0	0	0	0.0253015	0	0	0
Li	V1.CD50-0_101218			Europe	Spanish					0	0	0	0	0	0	0	0	0	0	0	0	0.000249764	0	0	0	0	0	0	0	0	0	0	0	0	0	0	0	0	0	0	0	0	0	0	0	0.0273933	0	0	0
Li	V1.CD5-0-PN_101220			Europe	Spanish					0	0	0	0	0	0	0	0	0	0	0	0	0.000518467	0	0	0	0	0	0	0	0	0	0	0	0	0	0	0	0	0	0	0	0	0	0	0	0	0	0	0
Li	V1.CD51-0_110821			Europe	Spanish					0	0	0	0	0	0	0	0	0	0	0	0	0.00031201	0	0	0	0	0	0	0	0	0	0	0	0	0	0	0	0	0	0	0	0	0	0	0	0.0192152	0	0	0
Li	V1.CD52-0_110821			Europe	Spanish					0	0	0	0	0	0	0	0	0	0	0	0	0.000203805	0.000335715	0.0108521	0	0	0	0	0	0	0	0	0	0	0	0	0	0	0	0	0	0	0	0	0	0.00453256	0	0.000303859	0
Li	V1.CD53-0_110821			Europe	Spanish					0	0	0	0	0	0	0	0	0	0	0	0	6.12334e-05	0	0	0	0	0	0	0	0	0	0	0	0	0	0	0	0	0	0	0	0	0	0	0	0.0385208	0	0	0
Li	V1.CD54-0_110820			Europe	Spanish					0	0	0	0	0	0	0	0	0	0	0	0	0.000757227	0	0	0	0	0	0	0	0	0	0	0	0	0	0	0	0	0	0	0	0	0	0	0	0	0	0	0
Li	V1.CD55-0_110820			Europe	Spanish					0	0	0	0	0	0	0	0	0	0	0	0	5.65835e-05	0	0.00332226	0	0	0	0	0	0	0	0	0	0	0	0	0	0	0	0	0	0	0	0	0	0.0303618	0	0.000647765	0
Li	V1.CD6-0-PN_101220			Europe	Spanish					0	0	0	0	0	0.000393996	0	0	0	0	0	0	0.000187161	0.000287478	0	0	0	0	0	0	0	0	0	0	0.011257	0	0	0	0	0.000121043	0.00118758	0	0	0.000293934	0	0	0.00109443	0.00101025	0.00025701	0
Li	V1.CD6-0-PT_110820			Europe	Spanish					0	0	0	0	0	0.000312927	0	0	0	0.000425338	0.0008562	0.000405084	0.000278803	0.000395998	0.000303813	0	0	0.000329131	0	0.000759532	0	0	0	0	0	0	0	0	0	0.000181308	0.000213315	0	0	0.000262292	0	0	0.000506355	0.000198647	0.000383928	0.00055699
Li	V1.CD7-0-PN_101220			Europe	Spanish					0	0	0	0	0	0	0	0	0	0	0	0	0.00081103	0	0	0	0	0	0	0	0	0	0	0	0	0	0	0	0	0	0	0	0	0	0	0	0	0	0	0
Li	V1.CD8-0-PN_101220			Europe	Spanish					0	0	0	0	0	0	0	0	0	0	0	0	0	0	0	0	0	0	0	0	0	0	0	0	0	0	0	0	0	0	0	0	0	0	0	0	0.017301	0	0.0022041	0
Li	V1.FI01_110821			Europe	Spanish					0	0	0	0	0	0	0	0	0	0	0	0	9.64846e-05	0	0	0	0	0	0	0	0	0	0	0	0	0	0	0	0	0	0	0	0	0	0	0	0.0265805	0	0	0
Li	V1.FI02_110820			Europe	Spanish					0	0	0	0	0	0	0	0	0	0	0	0	0.00031911	0	0	0	0	0	0	0	0	0	0	0	0	0	0	0	0	0	0	0	0	0	0	0	0.0242131	0	0	0
Li	V1.FI03_110820			Europe	Spanish					0	0	0	0	0	0	0	0	0	0	0	0	0.000190067	0	0	0	0	0	0	0	0	0	0	0	0	0	0	0	0	0	0	0	0	0	0	0	0.0230471	0	0	0
Li	V1.FI04_110822			Europe	Spanish					0	0	0	0	0	0.000184192	0	0.00103093	0	0.000522337	0	0	0.000277255	0.000255515	0.000294551	0	0	0	0	0	0	0.000659794	0	0	0	0.00261168	0	0.000996564	0.000782448	0.000297085	0.000146231	0	0	0.00022543	0	0.000171821	0.00160367	0	0.000216542	0
Li	V1.FI05_110822			Europe	Spanish					0	0	0	0	0	0	0	0	0	0	0	0	0.000622904	0	0	0	0	0	0	0	0	0	0	0	0	0	0	0	0	0	0	0	0	0	0	0	0.00966495	0	0	0
Li	V1.FI06_110822			Europe	Spanish					0	0	0	0	0	0	0	0	0	0	0	0	0	0	0	0	0	0	0	0	0	0	0	0	0	0	0	0	0	0	0	0	0	0	0	0	0.0304136	0	0	0
Li	V1.FI07_110821			Europe	Spanish					0	0	0	0	0	0	0	0	0	0	0	0	0.000308191	0.000572581	0	0	0	0	0	0	0	0	0	0	0	0	0	0	0	0	0	0	0	0	0	0	0	0	0.000356164	0
Li	V1.FI08_110821			Europe	Spanish					0	0	0	0	0	0	0	0	0	0	0	0	0.000193899	0	0	0	0	0	0	0	0	0	0	0	0	0	0	0	0	0	0	0	0	0	0	0	0.0273058	0	0	0
Li	V1.FI09_110821			Europe	Spanish					0	0	0.00766284	0	0	0.000570456	0	0	0	0.00144742	0.000812725	0.00099333	0.000254461	0.0001708	0	0	0	0	0	0	0	0	0	0	0	0	0	0.00170285	0	0.000233456	0.00029664	0	0	0.000283809	0	0	0	0	0.000761035	0
Li	V1.FI10_110821			Europe	Spanish					0	0	0	0	0	0	0	0	0	0	0	0	0.00081103	0	0	0	0	0	0	0	0	0	0	0	0	0	0	0	0	0	0	0	0	0	0	0	0	0	0	0
Li	V1.FI11_110821			Europe	Spanish					0	0	0	0	0	0	0	0	0	0	0	0	0.000321194	0	0	0	0	0	0	0	0	0	0	0	0	0	0	0	0	0	0	0	0	0	0	0	0.0228175	0	0	0
Li	V1.FI12_110821			Europe	Spanish					0	0	0	0	0	0	0	0	0	0	0	0	0.000166174	0	0	0	0	0	0	0	0	0	0	0	0	0	0	0	0	0	0	0	0	0	0	0	0.0152905	0	0	0
Li	V1.FI13_110821			Europe	Spanish					0	0	0	0	0	0	0	0	0	0	0	0	0.000303308	0	0	0	0	0	0	0	0	0	0	0	0	0	0	0	0	0	0	0	0	0	0	0	0.0241258	0	0	0
Li	V1.FI14_110821			Europe	Spanish					0	0	0	0	0	0.000264659	0	0	0	0	0.00138967	0.00053236	0.000310127	0.000350051	0.000488902	0	0	0.000456308	0	0.00106472	0	0	0	0	0	0	0	0	0	7.35981e-05	0.000302183	0	0	0.000170355	0	0	0.000456308	0.000298356	0.000257846	0
Li	V1.FI15_110821			Europe	Spanish					0	0	0	0	0	0.000207326	0	0	0	0	0	0.000691085	0.000222235	0.000249404	0	0	0	0	0	0.00138217	0	0	0	0	0	0	0	0	0	0.000100319	0.000378626	0	0	0.000221147	0	0	0.00463603	0.000345543	0.000132537	0
Li	V1.FI16_110821			Europe	Spanish					0	0	0	0	0	0	0	0	0	0	0	0	0.000198932	0	0	0	0	0	0	0	0	0	0	0	0	0	0	0	0	0	0	0	0	0	0	0	0.026533	0	0	0
Li	V1.FI17_110822			Europe	Spanish					0	0	0	0	0	0.000410187	0	0	0	0.000302597	0	0	0.000255505	0.000418071	0.000348227	0.000504329	0	0	0	0	0	0.000319408	0	0.00462301	0	0	0	0.000651425	0.000375014	0.00024403	0.000152908	0	0.00142893	0.000179877	0	0.000868566	0.000984142	9.05206e-05	0.000157171	0.000182119
Li	V1.FI18_110822			Europe	Spanish					0	0	0	0	0	0	0	0	0	0	0	0	0.000654185	0	0	0	0	0	0	0	0	0	0	0	0	0	0	0	0	0	0	0	0	0	0	0	0.00615331	0	0	0
Li	V1.FI19_110822			Europe	Spanish					0	0	0	0	0	0	0	0	0	0	0	0	0.000539374	0	0	0	0	0	0	0	0	0	0	0	0	0	0	0	0	0	0	0	0	0	0	0	0	0	0	0
Li	V1.FI20_110822			Europe	Spanish					0	0	0	0	0	0	0	0	0	0	0	0	0.000278989	0	0	0	0	0	0	0	0	0	0	0	0	0	0	0	0	0	0	0	0	0	0	0	0.0208874	0	0.000254555	0
Li	V1.FI21_110822			Europe	Spanish					0	0	0	0	0	0	0	0	0	0	0	0	0.000516425	0	0	0	0	0	0	0	0	0	0	0	0	0	0	0	0	0	0	0	0	0	0	0	0	0	0	0
Li	V1.FI22_110822			Europe	Spanish					0	0	0	0	0	0	0	0	0	0	0	0	0.00016031	0	0	0	0	0	0	0	0	0	0	0	0	0	0	0	0	0	0	0	0	0	0	0	0.031881	0	0	0
Li	V1.FI23_110822			Europe	Spanish					0	0	0	0	0	0	0	0	0	0	0	0	0	0	0	0	0	0	0	0	0	0	0	0	0	0	0	0	0	0	0	0	0	0	0	0	0.0416667	0	0	0
Li	V1.FI24_110822			Europe	Spanish					0	0	0	0	0	0	0	0	0	0	0	0	0.000101515	0	0	0	0	0	0	0	0	0	0	0	0	0	0	0	0	0	0	0	0	0	0	0	0.0364513	0	0	0
Li	V1.FI25_110822			Europe	Spanish					0	0	0	0	0	0.00048	0	0	0	0	0	0	9.08354e-05	7.14286e-05	0	0	0	0	0	0	0	0	0	0	0	0	0	0	0	0	0	0	0	0	0	0	0.0261905	0	0	0
Li	V1.FI26_110822			Europe	Spanish					0	0	0	0	0	0	0	0	0	0	0	0	0.000131282	0	0	0	0	0	0	0	0	0	0	0	0	0	0	0	0	0	0	0	0	0	0	0	0.0209832	0	0	0
Li	V1.FI27_110822			Europe	Spanish					0	0	0	0	0	0	0	0	0	0	0	0	0	0	0	0	0	0	0	0	0	0	0	0	0	0	0	0	0	0	0	0	0	0	0	0	0.0310897	0	0	0
Li	V1.FI28_110822			Europe	Spanish					0	0	0	0	0	0	0	0	0	0	0	0	0.000364176	0.000141912	0	0	0	0	0	0	0	0	0	0	0	0	0	0	0	0	0	0	0	0	0	0	0.0131472	0	0	0
Li	V1.FI29_110822			Europe	Spanish					0	0	0	0	0	0	0	0	0	0	0	0	0.000305181	0	0	0	0	0	0	0	0	0	0	0	0	0	0	0	0	0	0	0	0	0	0	0	0	0	0	0
Li	V1.FI30_110822			Europe	Spanish					0	0	0	0	0	0	0	0	0	0	0	0	4.24068e-05	0	0	0	0	0	0	0	0	0	0	0	0	0	0	0	0	0	0	0	0	0	0	0	0.0245098	0	0	0
Li	V1.FI31_110822			Europe	Spanish					0	0	0	0	0	0	0	0	0	0	0	0	0.000174994	0.000108754	0	0	0	0	0	0	0	0	0	0	0	0	0	0	0	0.000936956	0	0	0	0	0	0	0.0055325	0	0.00150628	0
Li	V1.FI32_110822			Europe	Spanish					0	0	0	0	0	0	0	0	0	0	0	0	0.000665045	0	0	0	0	0	0	0	0	0	0	0	0	0	0	0	0	0	0	0	0	0	0	0	0	0	0.000332681	0
Li	V1.FI33_110822			Europe	Spanish					0	0	0	0	0	0	0	0	0	0	0	0	0.000790662	0	0	0	0	0	0	0	0	0	0	0	0	0	0	0	0	0	0	0	0	0	0	0	0	0	0	0
Li	V1.FI34_110822			Europe	Spanish					0	0	0	0	0	0	0	0	0	0	0	0	0.000386407	0	0	0	0	0	0	0	0	0	0	0	0	0	0	0	0	0	0	0	0	0	0	0	0.021815	0	0	0
Li	V1.FI35_110822			Europe	Spanish					0	0	0	0	0	0	0	0	0	0	0	0	4.31046e-05	0	0	0	0	0	0	0	0	0	0	0	0	0	0	0	0	0	0	0	0	0	0	0	0.0374762	0	0	0
Li	V1.FI36_110822			Europe	Spanish					0	0	0	0	0	0	0	0	0	0	0	0	0.000564572	0	0	0	0	0	0	0	0	0	0	0	0	0	0	0	0	0	0	0	0	0	0	0	0.0111557	0	0	0
Li	V1.FI37_110822			Europe	Spanish					0	0	0	0	0	0	0	0	0	0	0.00622981	0	3.70521e-05	0	0	0	0	0	0	0	0	0	0	0	0	0	0	0	0	0	0.00189005	0	0	0	0	0	0	0	0	0
Li	V1.UC22-1_100902			Europe	Spanish					0	0	0	0	0	0	0	0	0	0	0	0	0.000141839	0.000515333	0	0	0	0	0	0	0	0	0	0	0	0	0	0	0	0.000385747	0	0	0	0	0	0	0.0093423	0	0.000230358	0
Li	V1.UC38-4_100902			Europe	Spanish					0	0	0	0	0	0	0	0	0	0	0	0	3.56062e-05	0	0	0	0	0	0	0	0	0	0	0	0	0	0	0	0	0	0	0	0	0	0	0	0.0398374	0	0	0
Li	V1.UC39-4_101220			Europe	Spanish					0	0	0	0	0	0	0	0	0	0	0	0	0.000496067	0	0	0	0	0	0	0	0	0	0	0	0	0	0	0	0	0	0	0	0	0	0	0	0.0161812	0	0	0
Li	V1.UC40-1_100816			Europe	Spanish					0	0	0	0	0	0	0	0	0	0	0	0	6.31341e-05	0	0	0	0	0	0	0	0	0	0	0	0	0	0	0	0	0	0	0	0	0	0	0	0.0274451	0	0	0
Li	V1.UC47-4_101220			Europe	Spanish					0	0	0	0	0	0	0	0	0	0	0	0	2.65549e-05	0	0	0	0	0	0	0	0	0	0	0	0	0	0	0	0	0	0	0	0	0	0	0	0.0295589	0	0.00112131	0
Li	V1.UC54-4_101220			Europe	Spanish					0	0	0	0	0	0	0	0	0	0	0	0	0.000433807	0	0	0	0	0	0	0	0	0	0	0	0	0	0	0	0	0	0	0	0	0	0	0	0.0193798	0	0	0
Li	V1.UC56-1_100816			Europe	Spanish					0	0	0	0	0	0	0	0	0	0	0	0	0	0	0	0	0	0	0	0	0	0	0	0	0	0	0	0	0	0	0	0	0	0	0	0	0	0	0	0
Li	V1.UC58-4_110821			Europe	Spanish					0	0	0	0	0	0	0	0	0	0	0	0	0.000348103	0.000216618	0.00503637	0	0	0	0	0	0	0	0	0	0	0	0	0	0	0	0	0	0	0	0	0	0.00799758	0	0.000137983	0
Li	V1.UC59-0_100816			Europe	Spanish					0	0	0	0	0	0	0	0	0	0	0	0	8.94049e-05	0	0	0	0	0	0	0	0	0	0	0	0	0	0	0	0	0	0	0	0	0	0	0	0.0347769	0	0	0
Li	V1.UC59-4_110821			Europe	Spanish					0	0	0	0	0	0	0	0	0	0	0	0	0	0	0	0	0	0	0	0	0	0	0	0	0	0	0	0	0	0	0	0	0	0	0	0	0	0	0	0
Li	V1.UC60-0_100811			Europe	Spanish					0	0	0	0	0	0	0	0	0	0	0	0	0.000165893	0	0	0	0	0	0	0	0	0	0	0	0	0	0	0	0	0	0	0	0	0	0	0	0.0331439	0	0	0
Li	V1.UC63-0_101005			Europe	Spanish					0	0	0	0	0	0	0	0	0	0	0	0	7.85195e-05	0.000668685	0	0	0	0	0	0	0	0	0	0	0	0	0	0	0	0	0	0	0	0	0	0	0.000832813	0	0.000556159	0
Li	V1.UC64-0_101220			Europe	Spanish					0	0	0	0	0	0	0	0	0	0	0	0	0.000150191	0	0	0	0	0	0	0	0	0	0	0	0	0	0	0	0	0	0	0	0	0	0	0	0.0195473	0	0	0
Qin	SRR341581	F		Asia	China	59	Type 2 diabetes stage1	19.83	normal	0	0	0	0	0	0	0	0	0	0	0	0	0.000142286	0	0	0	0	0	0	0	0	0	0	0	0	0	0	0	0	0	0	0	0	0	0	0	0.0343567	0	0	0
Qin	SRR341582	F		Asia	China	43	Type 2 diabetes stage1	17.58	underweight	0	0	0	0	0	0	0	0	0	0	0	0	0.000168327	0	0	0	0	0	0	0	0	0	0	0	0	0	0	0	0	0	0	0	0	0	0	0	0	0	0	0
Qin	SRR341583	F		Asia	China	46	Type 2 diabetes stage1	20.31	normal	0	0	0	0	0	0	0	0	0	0	0	0	0.000423146	0	0	0	0	0	0	0	0	0	0	0	0	0	0	0	0	0	0	0	0	0	0	0	0.0199275	0	0	0
Qin	SRR341584	F		Asia	China	25	Type 2 diabetes stage1	19.78	normal	0	0	0	0	0	0	0	0	0	0	0	0	6.23869e-05	0	0	0	0	0	0	0	0	0	0	0	0	0	0	0	0	0	0	0	0	0	0	0	0.0240385	0	0.00237092	0
Qin	SRR341585	F		Asia	China	60	Type 2 diabetes stage1	18.43	underweight	0	0	0	0	0	0	0	0	0	0	0.0488215	0	0.0001577	0	0	0	0	0	0	0	0	0	0	0	0	0	0	0	0	0	0	0	0	0	0	0	0.0111883	0	0	0
Qin	SRR341586	F		Asia	China	71	Type 2 diabetes stage1	16	underweight	0	0	0	0	0	0	0	0	0	0	0	0	0	0	0	0	0	0	0	0	0	0	0	0	0	0	0	0	0	0	0	0	0	0	0	0	0.0416667	0	0	0
Qin	SRR341587	F		Asia	China	62	Type 2 diabetes stage1	19.69	normal	0	0	0	0	0	0	0	0	0	0	0	0	0.000230157	0	0	0	0	0	0	0	0	0	0	0	0	0	0	0	0	0	0	0	0	0	0	0	0.0298423	0	0	0
Qin	SRR341588	F		Asia	China	54	Type 2 diabetes stage1	19.4	normal	0	0	0	0	0	0	0	0	0	0	0	0	0.000194746	0	0	0	0	0	0	0	0	0	0	0	0	0	0	0	0	0	0	0	0	0	0	0	0.0316616	0	0	0
Qin	SRR341589	F		Asia	China	51	Type 2 diabetes stage1	19.29	normal	0	0	0	0	0	0	0	0	0	0	0	0	0.000179233	0.000534664	0	0	0	0	0	0	0	0	0	0	0	0	0	0	0	0	0	0	0	0	0	0	0	0	0	0
Qin	SRR341590	M		Asia	China	29	Type 2 diabetes stage1	17.73	underweight	0	0	0	0	0	0	0	0	0	0	0	0	0.000120792	0	0	0	0	0	0	0	0	0	0	0	0	0	0	0	0	0	0	0	0	0	0	0	0.0206117	0	0	0
Qin	SRR341591	M		Asia	China	41	Type 2 diabetes stage1	20.8	normal	0	0	0	0	0	0	0	0	0	0	0	0	0.000635878	0	0	0	0	0	0	0	0	0	0	0	0	0	0	0	0	0	0	0	0	0	0	0	0.00899844	0	0	0
Qin	SRR341592	M		Asia	China	38	Type 2 diabetes stage1	20.2	normal	0	0	0	0	0	0	0	0	0	0	0	0	3.1996e-05	0	0	0	0	0	0	0	0	0	0	0	0	0	0	0	0	0	0	0	0	0	0	0	0.0400229	0	0	0
Qin	SRR341593	M		Asia	China	35	Type 2 diabetes stage1	19.72	normal	0	0	0	0	0	0	0	0	0	0	0	0	6.57592e-05	0	0	0	0	0	0	0	0	0	0	0	0	0	0	0	0	0	0	0	0	0	0	0	0.0382883	0	0	0
Qin	SRR341594	M		Asia	China	28	Type 2 diabetes stage1	18.59	normal	0	0	0	0	0	0	0	0	0	0	0	0	8.49988e-05	0	0	0	0	0	0	0	0	0	0	0	0	0	0	0	0	0	0	0	0	0	0	0	0.0254731	0	0	0
Qin	SRR341595	M		Asia	China	43	Type 2 diabetes stage1	20.05	normal	0	0	0	0	0	0	0	0	0	0	0	0	0.000270343	0	0	0	0	0	0	0	0	0	0	0	0	0	0	0	0	0	0	0	0	0	0	0	0.0214026	0	0	0
Qin	SRR341596	M		Asia	China	38	Type 2 diabetes stage1	19.59	normal	0	0	0	0	0	0	0	0	0	0	0	0	0.000761447	0	0	0	0	0	0	0	0	0	0	0	0	0	0	0	0	0	0	0	0	0	0	0	0	0	0	0
Qin	SRR341597	M		Asia	China	30	Type 2 diabetes stage1	20.05	normal	0	0	0	0	0	0	0	0	0	0	0	0	0	0	0	0	0	0	0	0	0	0	0	0	0	0	0	0	0	0	0	0	0	0	0	0	0.0176282	0	0	0
Qin	SRR341598	M		Asia	China	49	Type 2 diabetes stage1	20.05	normal	0	0	0	0	0	0	0	0	0	0	0	0	8.27582e-05	0	0	0	0	0	0	0	0	0	0	0	0	0	0	0	0	0	0	0	0	0	0	0	0.037415	0	0	0
Qin	SRR341599	F		Asia	China	56	Type 2 diabetes stage1	25.3	overweight	0	0	0	0	0	0	0	0	0	0	0	0	0.000177413	0	0	0	0	0	0	0	0	0	0	0	0	0	0	0	0	0	0	0	0	0	0	0	0.0276693	0	0	0
Qin	SRR341600	F		Asia	China	70	Type 2 diabetes stage1	25.78	overweight	0	0	0	0	0	0	0	0	0	0	0	0	0.000453223	0	0	0	0	0	0	0	0	0	0	0	0	0	0	0	0	0	0	0	0	0	0	0	0.0183824	0	0	0
Qin	SRR341601	F		Asia	China	68	Type 2 diabetes stage1	27.64	overweight	0	0	0	0	0	0	0	0	0	0	0	0	9.54153e-05	0	0	0	0	0	0	0	0	0	0	0	0	0	0	0	0	0	0	0	0	0	0	0	0.0367647	0	0	0
Qin	SRR341602	F		Asia	China	62	Type 2 diabetes stage1	27.78	overweight	0	0	0	0	0	0	0	0	0	0	0	0	0.000155304	0	0	0	0	0	0	0	0	0	0	0	0	0	0	0	0	0	0	0	0	0	0	0	0.0336879	0	0	0
Qin	SRR341603	F		Asia	China	48	Type 2 diabetes stage1	27.06	overweight	0	0	0	0	0	0	0	0	0	0	0	0	0	0	0	0	0	0	0	0	0	0	0	0	0	0	0	0	0	0	0	0	0	0	0	0	0.0416667	0	0	0
Qin	SRR341604	F		Asia	China	61	Type 2 diabetes stage1	27.15	overweight	0	0	0	0	0	0	0	0	0	0	0	0	0	0	0	0	0	0	0	0	0	0	0	0	0	0	0	0	0	0	0	0	0	0	0	0	0	0	0	0
Qin	SRR341605	F		Asia	China	53	Type 2 diabetes stage1	25.97	overweight	0	0	0	0	0	0	0	0	0	0	0	0	0.000185167	0	0	0	0	0	0	0	0	0	0	0	0	0	0	0	0	0	0	0	0	0	0	0	0.0304414	0	0	0
Qin	SRR341606	F		Asia	China	63	Type 2 diabetes stage1	29.79	overweight	0	0	0	0	0	0	0	0	0	0	0	0	7.05243e-05	0	0	0	0	0	0	0	0	0	0	0	0	0	0	0	0	0	0	0	0	0	0	0	0.0380435	0	0	0
Qin	SRR341607	M		Asia	China	49	Type 2 diabetes stage1	25.31	overweight	0	0	0	0	0	0	0	0	0	0	0	0	0.00081103	0	0	0	0	0	0	0	0	0	0	0	0	0	0	0	0	0	0	0	0	0	0	0	0	0	0	0
Qin	SRR341608	M		Asia	China	57	Type 2 diabetes stage1	25.69	overweight	0	0	0	0	0	0	0	0	0	0	0	0	0	0	0	0	0	0	0	0	0	0	0	0	0	0	0	0	0	0	0	0	0	0	0	0	0.0416667	0	0	0
Qin	SRR341609	M		Asia	China	71	Type 2 diabetes stage1	25.39	overweight	0	0	0	0	0	0	0	0	0	0	0	0	0.000174415	0	0	0	0	0	0	0	0	0	0	0	0	0	0	0	0	0	0	0	0	0	0	0	0.0327061	0	0	0
Qin	SRR341610	M		Asia	China	41	Type 2 diabetes stage1	27.72	overweight	0	0	0	0	0	0	0	0	0	0	0	0	0.000305606	0	0	0	0	0	0	0	0	0	0	0	0	0	0	0	0	0	0	0	0	0	0	0	0.0187198	0	0	0
Qin	SRR341611	M		Asia	China	43	Type 2 diabetes stage1	25.65	overweight	0	0	0	0	0	0	0	0	0	0	0	0	0	0	0	0	0	0	0	0	0	0	0	0	0	0	0	0	0	0	0	0	0	0	0	0	0.030303	0	0	0
Qin	SRR341612	M		Asia	China	72	Type 2 diabetes stage1	25.71	overweight	0	0	0	0	0	0	0	0	0	0	0	0	0.000182664	0	0	0	0	0	0	0	0	0	0	0	0	0	0	0	0	0	0	0	0	0	0	0	0.03003	0	0	0
Qin	SRR341613	M		Asia	China	39	Type 2 diabetes stage1	25.51	overweight	0	0	0	0	0	0	0	0	0	0	0	0	8.17082e-05	0	0	0	0	0	0	0	0	0	0	0	0	0	0	0	0	0	0	0	0	0	0	0	0.0264303	0	0	0
Qin	SRR341614	M		Asia	China	42	Type 2 diabetes stage1	25.39	overweight	0	0	0	0	0	0	0	0	0	0	0	0	0.000381661	0	0	0	0	0	0	0	0	0	0	0	0	0	0	0	0	0	0	0	0	0	0	0	0.0220588	0	0	0
Qin	SRR341615	M		Asia	China	62	Type 2 diabetes stage1	25.39	overweight	0	0	0	0	0	0	0	0	0	0	0	0	0.000340109	0	0	0	0	0	0	0	0	0	0	0	0	0	0	0	0	0	0	0	0	0	0	0	0.011828	0	0	0
Qin	SRR341616	F		Asia	China	31	Type 2 diabetes stage1	17.94	underweight	0	0	0	0	0	0	0	0	0	0	0	0	6.72356e-05	0	0	0	0	0	0	0	0	0	0	0	0	0	0	0	0	0	0	0	0	0	0	0	0.0367012	0	0	0
Qin	SRR341617	F		Asia	China	34	Type 2 diabetes stage1	17.97	underweight	0	0	0	0	0	0	0	0	0	0	0	0	3.79746e-05	0	0	0	0	0	0	0	0	0	0	0	0	0	0	0	0	0	0	0	0	0	0	0	0.0215998	0	0	0
Qin	SRR341618	F		Asia	China	44	Type 2 diabetes stage1	19.33	normal	0	0	0	0	0	0	0	0	0	0	0	0	8.1103e-05	0	0	0	0	0	0	0	0	0	0	0	0	0	0	0	0	0	0	0	0	0	0	0	0.0236111	0	0	0
Qin	SRR341619	F		Asia	China	27	Type 2 diabetes stage1	17.8	underweight	0	0	0	0	0	0	0	0	0	0	0	0	0	0	0	0	0	0	0	0	0	0	0	0	0	0	0	0	0	0	0	0	0	0	0	0	0	0	0	0
Qin	SRR341620	F		Asia	China	39	Type 2 diabetes stage1	20.57	normal	0	0	0	0	0	0	0	0	0	0	0	0	8.00119e-05	0	0	0	0	0	0	0	0	0	0	0	0	0	0	0	0	0	0	0	0	0	0	0	0.0184978	0	0	0
Qin	SRR341621	F		Asia	China	27	Type 2 diabetes stage1	18.99	normal	0	0	0	0	0	0	0	0	0	0	0	0	0.000123315	0	0	0	0	0	0	0	0	0	0	0	0	0	0	0	0	0	0	0	0	0	0	0	0.0353314	0	0	0
Qin	SRR341622	F		Asia	China	35	Type 2 diabetes stage1	20.17	normal	0	0	0	0	0	0	0	0	0	0	0	0	1.13431e-05	0	0	0	0	0	0	0	0	0	0	0	0	0	0	0	0	0	0	0	0	0	0	0	0.0383644	0	0	0
Qin	SRR341623	F		Asia	China	25	Type 2 diabetes stage1	18.52	normal	0	0	0	0	0	0	0	0	0	0	0	0	6.43675e-05	0	0	0	0	0	0	0	0	0	0	0	0	0	0	0	0	0	0	0	0	0	0	0	0.0383598	0	0	0
Qin	SRR341624	F		Asia	China	37	Type 2 diabetes stage1	18.67	normal	0	0	0	0	0	0	0	0	0	0	0	0	0.000305798	0	0	0	0	0	0	0	0	0	0	0	0	0	0	0	0	0	0	0	0	0	0	0	0.0259563	0	0	0
Qin	SRR341625	M		Asia	China	32	Type 2 diabetes stage1	19.14	normal	0	0	0	0	0	0	0	0	0	0	0	0	9.20318e-05	0	0	0	0	0	0	0	0	0	0	0	0	0	0	0	0	0	0	0	0	0	0	0	0.0280733	0	0	0
Qin	SRR341626	M		Asia	China	23	Type 2 diabetes stage1	19.49	normal	0	0	0	0	0	0	0	0	0	0	0	0	2.67843e-05	0	0	0	0	0	0	0	0	0	0	0	0	0	0	0	0	0	0	0	0	0	0	0	0.0385293	0	0	0
Qin	SRR341627	M		Asia	China	42	Type 2 diabetes stage1	19.13	normal	0	0	0	0	0	0	0	0	0	0	0	0	6.17536e-05	0	0	0	0	0	0	0	0	0	0	0	0	0	0	0	0	0	0	0	0	0	0	0	0.037366	0	0	0
Qin	SRR341628	M		Asia	China	22	Type 2 diabetes stage1	19.57	normal	0	0	0	0	0	0	0	0	0	0	0.0208845	0	0.000120559	0	0	0	0	0	0	0	0	0	0	0	0	0	0	0	0	0	0	0	0	0	0	0	0	0	0	0
Qin	SRR341629	M		Asia	China	24	Type 2 diabetes stage1	18.37	underweight	0	0	0	0	0	0	0	0	0	0	0	0	0	0	0	0	0	0	0	0	0	0	0	0	0	0	0	0	0	0	0	0	0	0	0	0	0.0416667	0	0	0
Qin	SRR341630	M		Asia	China	23	Type 2 diabetes stage1	18.07	underweight	0	0	0	0	0	0	0	0	0	0	0	0	8.80188e-05	0	0	0	0	0	0	0	0	0	0	0	0	0	0	0	0	0	0	0	0	0	0	0	0.0371447	0	0	0
Qin	SRR341631	M		Asia	China	23	Type 2 diabetes stage1	19.47	normal	0	0	0	0	0	0	0	0	0	0	0	0	0	0	0	0	0	0	0	0	0	0	0	0	0	0	0	0	0	0	0	0	0	0	0	0	0	0	0	0
Qin	SRR341632	M		Asia	China	23	Type 2 diabetes stage1	19.16	normal	0	0	0	0	0	0	0	0	0	0	0	0	0.000274704	0	0	0	0	0	0	0	0	0	0	0	0	0	0	0	0	0	0	0	0	0	0	0	0.0275538	0	0	0
Qin	SRR341633	M		Asia	China	38	Type 2 diabetes stage1	19.38	normal	0	0	0	0	0	0	0	0	0	0	0	0	0.000243053	0	0	0	0	0	0	0	0	0	0	0	0	0	0	0	0	0	0	0	0	0	0	0	0.0236593	0	0	0
Qin	SRR341634	M		Asia	China	19	Type 2 diabetes stage1	17.29	underweight	0	0	0	0	0	0	0	0	0	0	0	0	0	0	0	0	0	0	0	0	0	0	0	0	0	0	0	0	0	0	0	0	0	0	0	0	0	0	0	0
Qin	SRR341635	F		Asia	China	45	Type 2 diabetes stage1	25.51	overweight	0	0	0	0	0	0	0	0	0	0	0	0	0.000381969	0	0	0	0	0	0	0	0	0	0	0	0	0	0	0	0	0	0	0	0	0	0	0	0.022043	0	0	0
Qin	SRR341636	F		Asia	China	51	Type 2 diabetes stage1	26.56	overweight	0	0	0	0	0	0	0	0	0	0	0	0	0.00081103	0	0	0	0	0	0	0	0	0	0	0	0	0	0	0	0	0	0	0	0	0	0	0	0	0	0	0
Qin	SRR341637	F		Asia	China	33	Type 2 diabetes stage1	25.07	overweight	0	0	0	0	0	0	0	0	0	0	0	0	0.000108137	0	0	0	0	0	0	0	0	0	0	0	0	0	0	0	0	0	0	0	0	0	0	0	0.0166667	0	0.00251142	0
Qin	SRR341638	F		Asia	China	35	Type 2 diabetes stage1	26.13	overweight	0	0	0	0	0	0	0	0	0	0	0	0	0.00081103	0	0	0	0	0	0	0	0	0	0	0	0	0	0	0	0	0	0	0	0	0	0	0	0	0	0	0
Qin	SRR341639	F		Asia	China	32	Type 2 diabetes stage1	24.89	normal	0	0	0	0	0	0	0	0	0	0	0.00349011	0	8.45132e-05	0	0.00626796	0	0	0	0	0	0	0	0	0	0	0	0	0	0	0.000746987	0	0	0	0	0	0	0.0297075	0	0	0
Qin	SRR341640	F		Asia	China	26	Type 2 diabetes stage1	25.24	overweight	0	0	0	0	0	0	0	0	0	0	0	0	5.75356e-05	0	0	0	0	0	0	0	0	0	0	0	0	0	0	0	0	0	0	0	0	0	0	0	0.0375171	0	0	0
Qin	SRR341641	F		Asia	China	30	Type 2 diabetes stage1	25.39	overweight	0	0	0	0	0	0	0	0	0	0	0	0	0.000495629	0	0	0	0	0	0	0	0	0	0	0	0	0	0	0	0	0	0	0	0	0	0	0	0.0162037	0	0	0
Qin	SRR341642	F		Asia	China	41	Type 2 diabetes stage1	25.48	overweight	0	0	0	0	0	0	0	0	0	0	0	0	0.000576562	0	0	0	0	0	0	0	0	0	0	0	0	0	0	0	0	0	0	0	0	0	0	0	0	0	0	0
Qin	SRR341643	F		Asia	China	42	Type 2 diabetes stage1	25.59	overweight	0	0	0	0	0	0	0	0	0	0	0	0	0.000210599	0	0	0	0	0	0	0	0	0	0	0	0	0	0	0	0	0.00142577	0	0	0	0	0	0	0.0253223	0	0	0
Qin	SRR341644	M		Asia	China	32	Type 2 diabetes stage1	29.06	overweight	0	0	0	0	0	0	0	0	0	0	0	0	8.20143e-05	0	0	0	0	0	0	0	0	0	0	0	0	0	0	0	0	0	0	0	0	0	0	0	0.0374532	0	0	0
Qin	SRR341645	M		Asia	China	72	Type 2 diabetes stage1	23.66	normal	0	0	0	0	0	0	0	0	0	0	0	0	0.000216275	0	0	0	0	0	0	0	0	0	0	0	0	0	0	0	0	0	0	0	0	0	0	0	0.0305556	0	0	0
Qin	SRR341646	M		Asia	China	54	Type 2 diabetes stage1	26.57	overweight	0	0	0	0	0	0	0	0	0	0	0	0	9.37926e-05	0	0	0	0	0	0	0	0	0	0	0	0	0	0	0	0	0	0	0	0	0	0	0	0.0368481	0	0	0
Qin	SRR341647	M		Asia	China	32	Type 2 diabetes stage1	25.71	overweight	0	0	0	0	0	0	0	0	0	0	0	0	0.00081103	0	0	0	0	0	0	0	0	0	0	0	0	0	0	0	0	0	0	0	0	0	0	0	0	0	0	0
Qin	SRR341648	M		Asia	China	42	Type 2 diabetes stage1	26.22	overweight	0	0	0	0	0	0	0	0	0	0	0	0	0.000159077	0	0	0	0	0	0	0	0	0	0	0	0	0	0	0	0	0	0	0	0	0	0	0	0.0334941	0	0	0
Qin	SRR341649	M		Asia	China	43	Type 2 diabetes stage1	25	overweight	0	0	0	0	0	0	0	0	0	0	0	0	3.24412e-05	0	0	0	0	0	0	0	0	0	0	0	0	0	0	0	0	0	0	0	0	0	0	0	0.0280702	0	0	0
Qin	SRR341650	M		Asia	China	23	Type 2 diabetes stage1	26.73	overweight	0	0	0	0	0	0	0	0	0	0	0	0	0	0	0	0	0	0	0	0	0	0	0	0	0	0	0	0	0	0	0	0	0	0	0	0	0.0416667	0	0	0
Qin	SRR341651	M		Asia	China	46	Type 2 diabetes stage1	27.12	overweight	0	0	0	0	0	0	0	0	0	0	0	0	9.67706e-05	0	0	0	0	0	0	0	0	0	0	0	0	0	0	0	0	0	0	0	0	0	0	0	0.0313684	0	0	0
Qin	SRR341652	M		Asia	China	52	Type 2 diabetes stage1	25.71	overweight	0	0	0	0	0	0	0	0	0	0	0	0	3.37149e-05	0	0	0	0	0	0	0	0	0	0	0	0	0	0	0	0	0	0	0	0	0	0	0	0.0279061	0	0	0
Qin	SRR341653	M		Asia	China	14	Type 2 diabetes stage1	32.58	obesity	0	0	0	0	0	0	0	0	0	0	0	0	8.07923e-05	0	0	0	0	0	0	0	0	0	0	0	0	0	0	0	0	0	0	0	0	0	0	0	0.0223499	0	0	0
Qin	SRR341654	F		Asia	China	53	Type 2 diabetes stage1	18.49	underweight	0	0	0	0	0	0	0	0	0	0	0	0	0.000305798	0.000437012	0	0	0	0	0	0	0	0	0	0	0	0	0	0	0	0	0	0	0	0	0	0	0	0	0	0
Qin	SRR341655	F		Asia	China	52	Type 2 diabetes stage1	19.47	normal	0	0	0	0	0	0	0	0	0	0	0	0	0	0	0	0	0	0	0	0	0	0	0	0	0	0	0	0	0	0	0	0	0	0	0	0	0.039267	0	0	0
Qin	SRR341656	F		Asia	China	49	Type 2 diabetes stage1	19.63	normal	0	0	0	0	0	0	0	0	0	0	0	0	0.000267046	0	0	0	0	0	0	0	0	0	0	0	0	0	0	0	0	0	0	0	0	0	0	0	0.0279472	0	0	0
Qin	SRR341657	F		Asia	China	61	Type 2 diabetes stage1	19.98	normal	0	0	0	0	0	0	0	0	0	0	0	0	0	0	0	0	0	0	0	0	0	0	0	0	0	0	0	0	0	0	0	0	0	0	0	0	0.03125	0	0	0
Qin	SRR341658	M		Asia	China	46	Type 2 diabetes stage1	20.24	normal	0	0	0	0	0	0	0	0	0	0	0	0	0.000651721	0	0	0	0	0	0	0	0	0	0	0	0	0	0	0	0	0	0	0	0	0	0	0	0.00595238	0	0	0
Qin	SRR341659	M		Asia	China	37	Type 2 diabetes stage1	19.03	normal	0	0	0	0	0	0	0	0	0	0	0	0	1.28962e-05	0	0	0	0	0	0	0	0	0	0	0	0	0	0	0	0	0	0	0	0	0.0040636	0	0	0.0132509	0	0	0
Qin	SRR341660	M		Asia	China	55	Type 2 diabetes stage1	20.57	normal	0	0	0	0	0	0	0	0	0	0	0	0	0.000191367	0	0	0	0	0	0	0	0	0	0	0	0	0	0	0	0	0	0	0	0	0	0	0	0.0318352	0	0	0
Qin	SRR341661	M		Asia	China	51	Type 2 diabetes stage1	18.37	underweight	0	0	0	0	0	0	0	0	0	0	0	0	0.00081103	0	0	0	0	0	0	0	0	0	0	0	0	0	0	0	0	0	0	0	0	0	0	0	0	0	0	0
Qin	SRR341662	M		Asia	China	48	Type 2 diabetes stage1	20.31	normal	0	0	0	0	0	0	0	0	0	0	0	0	0.000278906	0	0	0	0	0	0	0	0	0	0	0	0	0	0	0	0	0	0	0	0	0	0	0	0.0226244	0	0.000774809	0
Qin	SRR341663	M		Asia	China	56	Type 2 diabetes stage1	21.11	normal	0	0	0	0	0	0	0	0	0	0	0	0	0.000151548	0	0	0	0	0	0	0	0	0	0	0	0	0	0	0	0	0	0	0	0	0	0	0	0.0239562	0	0	0
Qin	SRR341664	M		Asia	China	70	Type 2 diabetes stage1	20.9	normal	0	0	0	0	0	0	0	0	0	0	0	0	0.000102363	0	0	0	0	0	0	0	0	0	0	0	0	0	0	0	0	0	0	0	0	0	0	0	0.0364078	0	0	0
Qin	SRR341665	M		Asia	China	52	Type 2 diabetes stage1	18.83	normal	0	0	0	0	0	0	0	0	0	0	0	0	0.000384172	0	0	0	0	0	0	0	0	0	0	0	0	0	0	0	0	0	0	0	0	0	0	0	0.0219298	0	0	0
Qin	SRR341666	M		Asia	China	49	Type 2 diabetes stage1	20.07	normal	0	0	0	0	0	0	0	0	0	0	0	0	4.98692e-05	0	0	0	0	0	0	0	0	0	0	0	0	0	0	0	0	0	0	0	0	0	0	0	0	0	0	0
Qin	SRR341667	M		Asia	China	47	Type 2 diabetes stage1	20.08	normal	0	0	0	0	0	0.00036452	0	0	0	0	0	0	0.000252277	0.000296418	0	0	0	0	0	0	0	0	0	0	0.0103281	0	0	0	0	9.79893e-05	0.000349009	0	0	0.000340219	0	0	0.00124038	0.000747733	0.000153964	0
Qin	SRR341668	M		Asia	China	41	Type 2 diabetes stage1	20.62	normal	0	0	0	0	0	0	0	0	0	0	0	0	0.00081103	0	0	0	0	0	0	0	0	0	0	0	0	0	0	0	0	0	0	0	0	0	0	0	0	0	0	0
Qin	SRR341669	M		Asia	China	58	Type 2 diabetes stage1	18.21	underweight	0	0	0	0	0	0	0	0	0	0	0	0	0.00081103	0	0	0	0	0	0	0	0	0	0	0	0	0	0	0	0	0	0	0	0	0	0	0	0	0	0	0
Qin	SRR341670	M		Asia	China	53	Type 2 diabetes stage1	19.84	normal	0.00138453	0	0	0	0	0.000221525	0	0	0	0.00047997	0.000738416	0.000246139	0.000265752	0.000375349	0.000514254	0	0	0.000261522	0	0.00110762	0	0	0	0	0	0	0	0	0.00120703	0.000223311	0.000239592	0	0	0.000298443	0	0.00020768	0.000426897	0.000426009	0.000406508	0
Qin	SRR341671	M		Asia	China	45	Type 2 diabetes stage1	20.81	normal	0	0	0	0	0	0	0	0	0	0	0	0	7.47924e-05	0	0	0	0	0	0	0	0	0	0	0	0	0	0	0	0	0	0	0	0	0	0	0	0.0348223	0	0	0
Qin	SRR341672	M		Asia	China	39	Type 2 diabetes stage1	20.57	normal	0	0	0	0	0	0	0	0	0	0	0	0	0	0	0	0	0	0	0	0	0	0	0	0	0	0	0	0	0	0	0	0	0	0	0	0	0	0	0	0
Qin	SRR341673	M		Asia	China	70	Type 2 diabetes stage1	21.6	normal	0	0	0	0	0	0	0	0	0	0	0	0	0	0	0	0	0	0	0	0	0	0	0	0	0	0	0	0	0	0	0	0	0	0	0	0	0	0	0	0
Qin	SRR341674	M		Asia	China	63	Type 2 diabetes stage1	20.42	normal	0	0	0	0	0	0	0	0	0	0	0	0	0.0007373	0	0	0	0	0	0	0	0	0	0	0	0	0	0	0	0	0	0	0	0	0	0	0	0	0	0	0
Qin	SRR341675	F		Asia	China	59	Type 2 diabetes stage1	26.71	overweight	0	0	0	0	0	0	0	0	0	0	0	0	0.000134756	0	0	0	0	0	0	0	0	0	0	0	0	0	0	0	0	0	0	0	0	0	0	0	0.0217949	0	0	0
Qin	SRR341676	F		Asia	China	63	Type 2 diabetes stage1	25.39	overweight	0	0	0	0	0	0	0	0	0	0	0	0	0	0	0	0	0	0	0	0	0	0	0	0	0	0	0	0	0	0	0	0	0	0	0	0	0.0388418	0	0	0
Qin	SRR341677	F		Asia	China	51	Type 2 diabetes stage1	26.04	overweight	0	0	0	0	0	0	0	0	0	0	0	0	0	0	0	0	0	0	0	0	0	0	0	0	0	0	0	0	0	0	0	0	0	0	0	0	0.0416667	0	0	0
Qin	SRR341678	F		Asia	China	40	Type 2 diabetes stage1	25.84	overweight	0	0	0	0	0	0	0	0	0	0	0	0	0	0	0	0	0	0	0	0	0	0	0	0	0	0	0	0	0	0	0	0	0	0	0	0	0.0177778	0	0	0
Qin	SRR341679	M		Asia	China	59	Type 2 diabetes stage1	25.26	overweight	0	0	0	0	0	0	0	0	0	0	0	0	6.72356e-05	0	0	0	0	0	0	0	0	0	0	0	0	0	0	0	0	0	0	0	0	0	0	0	0.0259067	0	0	0
Qin	SRR341680	M		Asia	China	53	Type 2 diabetes stage1	25.16	overweight	0	0	0	0	0	0	0	0	0	0	0	0	0	0	0	0	0	0	0	0	0	0	0	0	0	0	0	0	0	0	0	0	0	0	0	0	0.0416667	0	0	0
Qin	SRR341681	M		Asia	China	75	Type 2 diabetes stage1	25.39	overweight	0	0	0	0	0	0	0	0	0	0	0	0	0.00081103	0	0	0	0	0	0	0	0	0	0	0	0	0	0	0	0	0	0	0	0	0	0	0	0	0	0	0
Qin	SRR341682	M		Asia	China	74	Type 2 diabetes stage1	25.75	overweight	0	0	0	0	0	0	0	0	0	0	0	0	0.000156654	0	0	0	0	0	0	0	0	0	0	0	0	0	0	0	0	0	0	0	0	0	0	0	0.0336186	0	0	0
Qin	SRR341683	M		Asia	China	36	Type 2 diabetes stage1	26.82	overweight	0	0	0	0	0	0	0	0	0	0	0	0	0.000106116	0	0	0	0	0	0	0	0	0	0	0	0	0	0	0	0	0	0	0	0	0	0	0	0.0324507	0	0	0
Qin	SRR341684	M		Asia	China	68	Type 2 diabetes stage1	25.35	overweight	0	0	0	0	0	0	0	0	0	0	0	0	0.00081103	0	0	0	0	0	0	0	0	0	0	0	0	0	0	0	0	0	0	0	0	0	0	0	0	0	0	0
Qin	SRR341685	M		Asia	China	39	Type 2 diabetes stage1	27.58	overweight	0	0	0	0	0	0	0	0	0	0	0	0	2.52077e-05	0	0	0	0	0	0	0	0	0	0	0	0	0	0	0	0	0	0	0	0	0	0	0	0.0343468	0	0	0
Qin	SRR341686	M		Asia	China	68	Type 2 diabetes stage1	25.5	overweight	0	0	0	0	0	0	0	0	0	0	0	0	0	0	0	0	0	0	0	0	0	0	0	0	0	0	0	0	0	0	0	0	0	0	0	0	0.0416667	0	0	0
Qin	SRR341687	M		Asia	China	53	Type 2 diabetes stage1	25.31	overweight	0	0	0	0	0	0	0	0	0	0	0	0	0.000249548	0	0	0	0	0	0	0	0	0	0	0	0	0	0	0	0	0	0	0	0	0	0	0	0.0268817	0	0	0
Qin	SRR341688	M		Asia	China	31	Type 2 diabetes stage1	27.43	overweight	0	0	0	0	0	0	0	0	0	0	0	0	4.39019e-05	0	0	0	0	0	0	0	0	0	0	0	0	0	0	0	0	0	0	0	0	0	0	0	0.0344255	0	0	0
Qin	SRR341689	M		Asia	China	36	Type 2 diabetes stage1	27.28	overweight	0	0	0	0	0	0	0	0	0	0	0	0	2.36222e-05	0	0	0	0	0	0	0	0	0	0	0	0	0	0	0	0	0	0	0	0	0	0	0	0.0404531	0	0	0
Qin	SRR341690	F		Asia	China	26	Type 2 diabetes stage1	18.03	underweight	0	0	0	0	0	0	0	0	0	0	0	0	0.00081103	0	0	0	0	0	0	0	0	0	0	0	0	0	0	0	0	0	0	0	0	0	0	0	0	0	0	0
Qin	SRR341691	F		Asia	China	27	Type 2 diabetes stage1	19.53	normal	0	0	0	0	0	0	0	0	0	0	0	0	0.000369131	0	0	0	0	0	0	0	0	0	0	0	0	0	0	0	0	0	0	0	0	0	0	0	0.021751	0	0	0
Qin	SRR341692	F		Asia	China	32	Type 2 diabetes stage1	18.2	underweight	0	0	0	0	0	0	0	0	0	0	0	0	5.36852e-05	0	0	0	0	0	0	0	0	0	0	0	0	0	0	0	0	0	0	0	0	0	0	0	0.0206856	0	0.00275268	0
Qin	SRR341693	F		Asia	China	59	Type 2 diabetes stage1	19.15	normal	0	0	0	0	0	0	0	0	0	0	0	0	0.00081103	0	0	0	0	0	0	0	0	0	0	0	0	0	0	0	0	0	0	0	0	0	0	0	0	0	0	0
Qin	SRR341694	M		Asia	China	23	Type 2 diabetes stage1	18.72	normal	0	0	0	0	0	0	0	0	0	0	0	0	0	0	0	0	0	0	0	0	0	0	0	0	0	0	0	0	0	0	0	0	0	0	0	0	0.0416667	0	0	0
Qin	SRR341695	M		Asia	China	24	Type 2 diabetes stage1	19.35	normal	0	0	0	0	0	0	0	0	0	0	0	0	0	0	0	0	0	0	0	0	0	0	0	0	0	0	0	0	0	0	0	0	0	0	0	0	0	0	0	0
Qin	SRR341696	M		Asia	China	24	Type 2 diabetes stage1	19.03	normal	0	0	0	0	0	0	0	0	0	0	0	0	0.000263585	0	0	0	0	0	0	0	0	0	0	0	0	0	0	0	0	0	0	0	0	0	0	0	0.028125	0	0	0
Qin	SRR341697	M		Asia	China	22	Type 2 diabetes stage1	19.92	normal	0	0	0	0	0	0	0	0	0	0	0	0	0	0	0	0	0	0	0	0	0	0	0	0	0	0	0	0	0	0	0	0	0	0	0	0	0.0416667	0	0	0
Qin	SRR341698	M		Asia	China	23	Type 2 diabetes stage1	19.96	normal	0	0	0	0	0	0	0	0	0	0	0	0	5.19379e-05	0	0	0	0	0	0	0	0	0	0	0	0	0	0	0	0	0	0	0	0	0	0	0	0.0389984	0	0	0
Qin	SRR341699	M		Asia	China	25	Type 2 diabetes stage1	18.59	normal	0	0	0	0	0	0	0	0	0	0	0	0	4.67902e-05	0	0	0	0	0	0	0	0	0	0	0	0	0	0	0	0	0	0	0	0	0	0	0	0.0392628	0	0	0
Qin	SRR341700	M		Asia	China	29	Type 2 diabetes stage1	19.84	normal	0	0	0	0	0	0	0	0	0	0	0	0	0.000369583	0	0	0	0	0	0	0	0	0	0	0	0	0	0	0	0	0	0	0	0	0	0	0	0.0226793	0	0	0
Qin	SRR341701	M		Asia	China	23	Type 2 diabetes stage1	19.38	normal	0	0	0	0	0	0	0	0	0	0	0	0	0	0	0	0	0	0	0	0	0	0	0	0	0	0	0	0	0	0	0	0	0	0	0	0	0.0416667	0	0	0
Qin	SRR341702	M		Asia	China	24	Type 2 diabetes stage1	20.66	normal	0	0	0	0	0	0	0	0	0	0	0	0	8.91708e-05	0.000453893	0	0	0	0	0	0	0	0	0	0	0	0	0	0	0	0	0	0	0	0	0	0	0.0200698	0	0	0
Qin	SRR341703	M		Asia	China	22	Type 2 diabetes stage1	19.36	normal	0	0	0	0	0	0	0	0	0	0	0	0	0	0	0.0633484	0	0	0	0	0	0	0	0	0	0	0	0	0	0	0.00486547	0	0	0	0	0	0	0	0	0	0
Qin	SRR341704	M		Asia	China	21	Type 2 diabetes stage1	19.05	normal	0	0	0	0	0	0	0	0	0	0	0	0	0	0	0	0	0	0	0	0	0	0	0	0	0	0	0	0	0	0	0	0	0	0	0	0	0.0405605	0	0	0
Qin	SRR341705	M		Asia	China	25	Type 2 diabetes stage1	19.44	normal	0	0	0	0	0	0	0	0	0	0	0	0	5.47531e-05	0	0	0	0	0	0	0	0	0	0	0	0	0	0	0	0	0	0	0	0	0	0	0	0.0124824	0	0	0
Qin	SRR341706	M		Asia	China	33	Type 2 diabetes stage1	20.31	normal	0	0	0	0	0	0	0	0	0	0	0	0	0.000558677	0	0	0	0	0	0	0	0	0	0	0	0	0	0	0	0	0	0	0	0	0	0	0	0.011241	0	0	0
Qin	SRR341707	M		Asia	China	39	Type 2 diabetes stage1	19.49	normal	0	0	0	0	0	0	0	0	0	0	0	0	3.58466e-05	0	0	0	0	0	0	0	0	0	0	0	0	0	0	0	0	0	0	0	0	0	0	0	0.0230203	0	0	0
Qin	SRR341708	F		Asia	China	32	Type 2 diabetes stage1	25.39	overweight	0	0	0	0	0	0	0	0	0	0	0	0	4.60703e-05	0	0	0	0	0	0	0	0	0	0	0	0	0	0	0	0	0	0	0	0	0	0	0	0.0345168	0	0	0
Qin	SRR341709	F		Asia	China	30	Type 2 diabetes stage1	26.71	overweight	0	0	0	0	0	0	0	0	0	0	0	0	0.000240265	0	0	0	0	0	0	0	0	0	0	0	0	0	0	0	0	0	0	0	0	0	0	0	0.0201072	0	0	0
Qin	SRR341710	F		Asia	China	40	Type 2 diabetes stage1	24.89	normal	0	0	0	0	0	0	0	0	0	0	0	0	7.373e-05	0	0	0	0	0	0	0	0	0	0	0	0	0	0	0	0	0	0	0	0	0	0	0	0.035073	0	0	0
Qin	SRR341711	F		Asia	China	38	Type 2 diabetes stage1	25.81	overweight	0	0	0	0	0	0	0	0	0	0	0	0	0.000306389	0.000358423	0	0	0	0	0	0	0	0	0	0	0	0	0	0	0	0	0	0	0	0	0	0	0	0	0	0
Qin	SRR341712	M		Asia	China	48	Type 2 diabetes stage1	26.45	overweight	0	0	0	0	0	0	0	0	0	0	0	0	0.00016665	0	0	0	0	0	0	0	0	0	0	0	0	0	0	0	0	0	0	0	0	0	0	0	0.0228311	0	0	0
Qin	SRR341713	M		Asia	China	68	Type 2 diabetes stage1	28.3	overweight	0	0	0	0	0	0	0	0	0	0	0	0	1.62781e-05	0	0	0	0	0	0	0	0	0	0	0	0	0	0	0	0	0	0	0	0	0	0	0	0.0196773	0	0	0
Qin	SRR341714	M		Asia	China	46	Type 2 diabetes stage1	25.4	overweight	0	0	0	0	0	0	0	0	0	0	0	0	0	0	0	0	0	0	0	0	0	0	0	0	0	0	0	0	0	0	0	0	0	0	0	0	0	0	0	0
Qin	SRR341715	M		Asia	China	33	Type 2 diabetes stage1	25.18	overweight	0	0	0	0	0	0	0	0	0	0	0	0	0	0	0	0	0	0	0	0	0	0	0	0	0	0	0	0	0	0	0	0	0	0	0	0	0.00798403	0	0	0
Qin	SRR341716	M		Asia	China	30	Type 2 diabetes stage1	25.71	overweight	0	0	0	0	0	0	0	0	0	0	0	0	8.27582e-05	0	0	0	0	0	0	0	0	0	0	0	0	0	0	0	0	0	0	0	0	0	0	0	0.037415	0	0	0
Qin	SRR341717	M		Asia	China	41	Type 2 diabetes stage1	25.1	overweight	0	0	0	0	0	0	0	0	0	0	0	0	2.30898e-05	0	0	0	0	0	0	0	0	0	0	0	0	0	0	0	0	0	0	0	0	0	0	0	0.0392942	0	0	0
Qin	SRR341718	M		Asia	China	32	Type 2 diabetes stage1	25.73	overweight	0	0	0	0	0	0	0	0	0	0	0	0	4.80401e-05	0	0	0	0	0	0	0	0	0	0	0	0	0	0	0	0	0	0	0	0	0	0	0	0.0391986	0	0	0
Qin	SRR341719	M		Asia	China	37	Type 2 diabetes stage1	24.77	normal	0	0	0	0	0	0	0	0	0	0	0	0	0.000117386	0	0	0	0	0	0	0	0	0	0	0	0	0	0	0	0	0	0	0	0	0	0	0	0.0310673	0	0	0
Qin	SRR341720	M		Asia	China	39	Type 2 diabetes stage1	27.24	overweight	0	0	0	0	0	0	0	0	0	0	0	0	0	0	0	0	0	0	0	0	0	0	0	0	0	0	0	0	0	0	0	0	0	0	0	0	0	0	0	0
Qin	SRR341721	M		Asia	China	26	Type 2 diabetes stage1	25.47	overweight	0	0	0	0	0	0	0	0	0	0	0	0	0.00029831	0	0	0	0	0	0	0	0	0	0	0	0	0	0	0	0	0	0	0	0	0	0	0	0.026341	0	0	0
Qin	SRR341722	M		Asia	China	24	Type 2 diabetes stage1	25.21	overweight	0	0	0	0	0	0	0	0	0	0	0	0	0	0	0	0	0	0	0	0	0	0	0	0	0	0	0	0	0	0	0	0	0	0	0	0	0.0416667	0	0	0
Qin	SRR341723	M		Asia	China	28	Type 2 diabetes stage1	25.59	overweight	0	0	0	0	0	0	0	0	0	0	0	0	6.10906e-05	0	0	0	0	0	0	0	0	0	0	0	0	0	0	0	0	0	0	0	0	0	0	0	0.0340909	0	0	0
Qin	SRR341724	M		Asia	China	38	Type 2 diabetes stage1	25.71	overweight	0	0	0	0	0	0	0	0	0	0	0	0	0	0	0	0	0	0	0	0	0	0	0	0	0	0	0	0	0	0	0	0	0	0	0	0	0	0	0	0
Qin	SRR341725	M		Asia	China	47	Type 2 diabetes stage1	26.57	overweight	0	0	0	0	0	0	0	0	0	0	0	0	5.1494e-05	0	0	0	0	0	0	0	0	0	0	0	0	0	0	0	0	0	0	0	0	0	0	0	0.0275573	0	0	0
Rampelli_2015	SRR1927149	F	Rural	Africa	Tanzania	43	healthy			0	0	0.0148976	0	0	0	0	0	0	0	0.00126968	0.00201738	0.000268833	0.000170827	0	0	0	0	0	0	0	0	0	0	0	0	0	0	0	0.000160189	0.000277349	0	0	0.00027933	0	0	0	0	0.000216831	0
Rampelli_2015	SRR1929408	F		Africa	Tanzania	40	healthy			0	0	0.0105	0	0	0.00036	0	0	0	0.0018	0.000863636	0.00125	0.00027129	0.000196573	0	0	0	0	0	0	0	0	0	0	0	0	0	0.002125	0	0.00027957	0.000244681	0	0	0.000266667	0	0	0	0	0.000342466	0
Rampelli_2015	SRR1929484	F	Rural	Africa	Tanzania	29	healthy			0	0	0	0	0	0	0	0	0	0	0	0	0.000195766	0.000521413	0	0	0	0	0	0	0	0	0	0	0	0	0	0	0	0	0.00128393	0	0	0	0	0	0	0	0	0
Rampelli_2015	SRR1929485	F	Rural	Africa	Tanzania	8	healthy			0	0	0	0	0	0	0	0	0	0	0	0	0	0	0	0	0	0	0	0	0	0	0	0	0	0	0	0	0	0	0	0	0	0	0	0	0	0	0	0
Rampelli_2015	SRR1929563	M	Rural	Africa	Tanzania	34	healthy			0	0	0	0	0	0	0	0	0	0	0	0	0	0.00104839	0	0	0	0	0	0	0	0	0	0	0	0	0	0	0	0.00516129	0	0	0	0	0	0	0	0	0	0
Rampelli_2015	SRR1929574	M	Rural	Africa	Tanzania	16	healthy			0	0	0	0	0	0	0	0	0	0	0	0	0.000244148	0.000257915	0	0	0	0	0	0	0	0	0	0	0	0	0	0	0.000711863	0.000251696	0.000136091	0	0	0.000235892	0	0.00058973	0.000703139	0	0.000298283	0
Rampelli_2015	SRR1930121	M		Africa	Tanzania	30	healthy			0	0	0	0	0	0	0	0	0	0	0	0	0	0.00112327	0	0	0	0	0	0	0	0	0	0	0	0	0	0	0	0.0047619	0	0	0	0	0	0	0	0	0	0
Rampelli_2015	SRR1930122	M	Rural	Africa	Tanzania	21	healthy			0	0	0	0	0	0	0	0	0	0	0	0	0	0.000119362	0	0	0	0	0	0	0	0	0	0	0	0	0	0	0	0.000509277	0	0	0	0	0	0	0	0	0	0
Rampelli_2015	SRR1930123	M		Africa	Tanzania	23	healthy			0	0	0.00515996	0	0	0.000199518	0	0	0	0.000859993	0.000390906	0.000630662	0.000252209	0.000237538	0	0.000859993	0	0	0	0	0	0	0	0	0	0	0	0.000988992	0.000357228	0.000242278	0.000173828	0	0	0.000199518	0	0	0.000322497	0	0.00029334	0
Rampelli_2015	SRR1930128	M	Rural	Africa	Tanzania	17	healthy			0	0	0	0	0	0	0	0	0	0	0	0	0	0	0	0	0	0	0	0	0	0	0	0	0	0	0	0	0	0	0	0	0	0	0	0	0	0	0	0
Rampelli_2015	SRR1930132	M	Rural	Africa	Tanzania	15	healthy			0	0	0	0	0	0	0	0	0	0	0	0	0	0	0	0	0	0	0	0	0	0	0	0	0	0	0	0	0	0	0	0	0	0	0	0	0	0	0	0
Rampelli_2015	SRR1930133	M	Rural	Africa	Tanzania	37	healthy			0	0	0	0	0	0	0	0	0	0	0	0	0	0	0	0	0	0	0	0	0	0	0	0	0	0	0	0	0	0	0	0	0	0	0	0	0	0	0	0
Rampelli_2015	SRR1930134	M	Rural	Africa	Tanzania	13	healthy			0	0	0.0158879	0	0	0	0	0	0	0	0.00135939	0.00186916	0.00027666	0.000186539	0	0	0	0	0	0	0	0	0	0	0	0	0	0	0	0	0.000343011	0	0	0.00034891	0	0	0	0	0.000198438	0
Rampelli_2015	SRR1930136	M		Africa	Tanzania	43	healthy			0	0	0	0	0	0	0	0	0	0	0	0	0	0	0	0	0	0	0	0	0	0	0	0	0	0	0	0	0	0	0	0	0	0	0	0	0	0	0	0
Rampelli_2015	SRR1930138	M	Rural	Africa	Tanzania	38	healthy			0	0	0	0	0	0	0	0	0	0	0	0	0.000405515	0	0	0	0	0	0	0	0	0	0	0	0	0	0	0	0	0	0	0	0	0	0	0	0	0	0	0
Rampelli_2015	SRR1930140	M	Rural	Africa	Tanzania	24	healthy			0	0	0	0	0	0	0	0	0	0	0	0	0	0	0	0	0	0	0	0	0	0	0	0	0	0	0	0	0	0	0	0	0	0	0	0	0	0	0	0
Rampelli_2015	SRR1930141	M		Africa	Tanzania	65	healthy			0	0	0.0120101	0	0	0.000467762	0	0	0	0.00189633	0.000976899	0.00168563	0.000284527	0.0001644	0	0	0	0	0	0	0	0	0	0	0	0	0	0.00252845	0	0.00028547	0.000215187	0	0	0.000210704	0	0	0	0	0.000294408	0
Rampelli_2015	SRR1930142	M	Rural	Africa	Tanzania	40	healthy			0	0	0.0138151	0	0	0.000276302	0	0	0	0	0.00135253	0.0021254	0.000312863	0.000194971	0	0	0	0	0	0	0	0	0	0	0	0	0	0.00345377	0	0	0.00025437	0	0	0.000177117	0	0	0	0	0.000407611	0
Rampelli_2015	SRR1930143	M	Rural	Africa	Tanzania	48	healthy			0	0	0	0	0	0	0	0	0	0	0	0	0.000421736	0	0	0	0	0	0	0	0	0	0	0	0	0	0	0	0	0	0	0	0	0	0	0	0	0	0	0
Rampelli_2015	SRR1930144	F	Rural	Africa	Tanzania	29	healthy			0	0	0	0	0	0	0	0	0	0	0	0	0.000284956	0.00065388	0	0	0	0	0	0	0	0	0	0	0	0	0	0	0	0	0	0	0	0	0	0	0	0	0	0
Rampelli_2015	SRR1930145	M		Africa	Tanzania	22	healthy			0	0	0	0	0	0	0	0	0	0	0	0	0	0	0	0	0	0	0	0	0	0	0	0	0	0	0	0	0	0	0	0	0	0	0	0	0	0	0	0
Rampelli_2015	SRR1930149	M	Rural	Africa	Tanzania	24	healthy			0	0	0	0	0	0	0	0	0	0	0	0	0	0	0	0	0	0	0	0	0	0	0	0	0	0	0	0	0	0	0	0	0	0	0	0	0	0	0	0
Rampelli_2015	SRR1930176	F	Rural	Africa	Tanzania	70	healthy			0	0	0	0	0	0	0	0	0	0	0	0	0	0	0	0	0	0	0	0	0	0	0	0	0	0	0	0	0	0	0	0	0	0	0	0	0	0	0	0
Rampelli_2015	SRR1930177	M	Rural	Africa	Tanzania	30	healthy			0	0	0	0	0	0	0	0	0	0	0	0	0	0	0	0	0	0	0	0	0	0	0	0	0	0	0	0	0	0	0	0	0	0	0	0	0	0	0	0
Rampelli_2015	SRR1930179	F	Rural	Africa	Tanzania	38	healthy			0	0	0	0	0	0	0	0	0	0	0	0	0	0	0	0	0	0	0	0	0	0	0	0	0	0	0	0	0	0	0	0	0	0	0	0	0	0	0	0
Rampelli_2015	SRR1930187	F	Rural	Africa	Tanzania	20	healthy			0	0	0	0	0	0	0	0	0	0	0	0	0	0	0	0	0	0	0	0	0	0	0	0	0	0	0	0	0	0	0	0	0	0	0	0	0	0	0.00684932	0
Rampelli_2015	SRR1930244	F	Rural	Africa	Tanzania	47	healthy			0	0	0	0	0	0	0	0	0	0	0	0	0.000207956	0	0	0	0	0	0	0	0	0	0	0	0	0	0	0	0	0	0	0	0	0	0	0	0	0	0	0
Rampelli_2015	SRR1930247	M	Urban	Europe	Italy	38	healthy			0	0	0	0	0	0	0	0	0	0	0	0	0	0	0	0	0	0	0	0	0	0	0	0	0	0	0	0	0	0	0	0	0	0	0	0	0.0416667	0	0	0
Rampelli_2015	SRR1930248	F	Urban	Europe	Italy	40	healthy			0	0	0	0	0	0	0	0	0	0	0	0	0	0	0	0	0	0	0	0	0	0	0	0	0	0	0	0	0	0	0	0	0	0	0	0	0	0	0	0
Rampelli_2015	SRR1930250	F	Urban	Europe	Italy	21	healthy			0	0	0	0	0	0	0	0	0	0	0	0	0	0	0	0	0	0	0	0	0	0	0	0	0	0	0	0	0	0	0	0	0	0	0	0	0	0	0	0
Rampelli_2015	SRR1930251	F	Urban	Europe	Italy	30	healthy			0	0	0	0	0	0	0	0	0	0	0	0	0	0	0	0	0	0	0	0	0	0	0	0	0	0	0	0	0	0	0	0	0	0	0	0	0	0	0	0
Rampelli_2015	SRR1930253	F	Urban	Europe	Italy	34	healthy			0	0	0	0	0	0	0	0	0	0	0	0	0.000453627	0	0	0	0	0	0	0	0	0	0	0	0	0	0	0	0	0	0	0	0	0	0	0	0	0	0	0
Rampelli_2015	SRR1930255	F	Urban	Europe	Italy	29	healthy			0	0	0	0	0	0	0	0	0	0	0	0	0	0	0	0	0	0	0	0	0	0	0	0	0	0	0	0	0	0	0	0	0	0	0	0	0.0416667	0	0	0
Rampelli_2015	SRR1930777	M	Urban	Europe	Italy	27	healthy			0	0	0	0	0	0	0	0	0	0	0	0	0	0	0	0	0	0	0	0	0	0	0	0	0	0	0	0	0	0	0	0	0	0	0	0	0	0	0	0
Rampelli_2015	SRR1931170	M	Urban	Europe	Italy	30	healthy			0	0	0	0	0	0	0	0	0	0	0	0	4.52193e-05	0	0	0	0	0	0	0	0	0	0	0	0	0	0	0	0	0	0	0	0	0	0	0	0.0382194	0	0	0
Rampelli_2015	SRR1931173	F	Urban	Europe	Italy	32	healthy			0	0	0	0	0	0	0	0	0	0	0	0	0.000364763	0	0	0	0	0	0	0	0	0	0	0	0	0	0	0	0	0	0	0	0	0	0	0	0.0116694	0	0	0
Rampelli_2015	SRR1931177	F	Urban	Europe	Italy	25	healthy			0	0	0	0	0	0	0	0	0	0	0	0	0	0	0	0	0	0	0	0	0	0	0	0	0	0	0	0	0	0	0	0	0	0	0	0	0	0	0	0
Rampelli_2015	SRR1931178	M	Urban	Europe	Italy	34	healthy			0	0	0	0	0	0	0	0	0	0	0	0	0	0	0	0	0	0	0	0	0	0	0	0	0	0	0	0	0	0	0	0	0	0	0	0	0	0	0	0
Rampelli_2020	SRR9654970	F	Urban	Europe	Italy	106				0	0	0	0	0	0	0	0	0	0	0	0	0	0.000672043	0	0	0	0	0	0	0	0	0	0	0	0	0	0	0	0	0	0	0	0	0	0	0	0	0	0
Rampelli_2020	SRR9654971	F	Urban	Europe	Italy	105				0	0	0	0	0	0	0	0	0	0	0	0	0	0	0	0	0	0	0	0	0	0	0	0	0	0	0	0	0	0	0	0	0	0	0	0	0	0	0	0
Rampelli_2020	SRR9654972	M	Urban	Europe	Italy	106				0	0	0	0	0	0	0	0	0	0	0	0	0.00081103	0	0	0	0	0	0	0	0	0	0	0	0	0	0	0	0	0	0	0	0	0	0	0	0	0	0	0
Rampelli_2020	SRR9654973	F	Urban	Europe	Italy	108				0	0	0	0	0	0	0	0	0	0.00180328	0	0	0.00021007	0.000652763	0	0	0	0	0	0	0	0	0	0	0	0	0	0	0.000945776	0.000158646	6.97593e-05	0	0	0.000360656	0	0	0	0	0.000471592	0
Rampelli_2020	SRR9654974	F	Urban	Europe	Italy	105				0	0.00280861	0	0	0	0.000147118	0	0	0	0	0.000218853	0	0.000290266	0.000254005	0.000382124	0	0	0	0	0	0	0	0	0	0	0	0	0	0	0.000402669	0.000232628	0	0	0.000356649	0	0.000612991	0.000133743	0.000545262	0.00035268	0.000468102
Rampelli_2020	SRR9654975	F	Urban	Europe	Italy	105				0	0	0	0	0	0.000221037	0	0.00116335	0.000824043	0.000387785	0.000255585	0	0.000270003	0.000328953	0.000540129	0	0	0	0	0	0	0.000407174	0	0	0	0.00164809	0	0.000824043	0.000141691	0.00023559	0.000387269	0	0.00145419	0.000327678	0	0.000323154	0.000185814	0.000119318	0.000152723	0.000662466
Rampelli_2020	SRR9654976	F	Urban	Europe	Italy	105				0	0	0	0	0	0	0	0	0	0	0	0	0	0	0	0	0	0	0	0	0	0	0	0	0	0	0	0	0	0	0	0	0	0	0	0	0	0	0	0
Rampelli_2020	SRR9654977	F	Urban	Europe	Italy	104				0	0.0101868	0	0	0	0.000373514	0	0	0	0	0	0	0.000294211	0.000156316	0	0	0	0	0	0	0	0	0	0	0	0	0	0	0	0.000182558	0.000279955	0	0	0.000607433	0	0	0	0.00082713	0.000267461	0.00150915
Rampelli_2020	SRR9654978	M	Urban	Europe	Italy	105				0	0	0	0	0	0	0	0	0	0	0	0	0	0	0	0	0	0	0	0	0	0	0	0	0	0	0	0	0	0	0	0	0	0	0	0	0	0	0	0
Rampelli_2020	SRR9654979	F	Urban	Europe	Italy	105				0	0	0	0	0	0	0	0	0	0	0	0	0	0	0	0	0	0	0	0	0	0	0	0	0	0	0	0	0	0	0	0	0	0	0	0	0	0	0	0
Rampelli_2020	SRR9654980	F	Urban	Europe	Italy	107				0	0	0	0	0	0.000114749	0	0	0	0	0	0	0.000342696	0.000201409	0	0	0	0	0	0	0	0	0	0	0	0	0	0	0	0.000254029	0.000159772	0	0	0.000472494	0	0	0	0	0.000251966	0.000674992
Rampelli_2020	SRR9654981	F	Urban	Europe	Italy	105				0	0	0	0	0	0	0	0	0	0	0	0	0	0.000553447	0	0	0	0	0	0	0	0	0	0	0	0	0	0	0	0	0.00385899	0	0	0	0	0	0	0	0	0
Rampelli_2020	SRR9654982	F	Urban	Europe	Italy	70				0	0	0	0	0	0	0	0	0	0	0	0	0.000765658	0	0	0	0	0	0	0	0	0	0	0	0	0	0	0	0	0	0	0	0	0	0	0	0	0	0	0
Rampelli_2020	SRR9654983	F	Urban	Europe	Italy	63				0	0	0	0	0	0	0	0	0	0	0	0	0	0	0	0	0	0	0	0	0	0	0	0	0	0	0	0	0	0	0	0	0	0	0	0	0	0	0	0
Rampelli_2020	SRR9654984	F	Urban	Europe	Italy	71				0	0	0	0	0	0	0	0	0	0	0	0	0	0	0	0	0	0	0	0	0	0	0	0	0	0	0	0	0	0	0	0	0	0	0	0	0	0	0	0
Rampelli_2020	SRR9654985	F	Urban	Europe	Italy	75				0	0	0	0	0	0	0	0	0	0	0	0	0.000232796	0	0	0	0	0	0	0	0	0	0	0	0	0	0	0	0	0	0	0	0	0	0	0	0	0	0	0
Rampelli_2020	SRR9654986	F	Urban	Europe	Italy	70				0	0	0	0	0	0	0	0	0	0	0	0	0.000510164	0	0	0	0	0	0	0	0	0	0	0	0	0	0	0	0	0	0	0	0	0	0	0	0.015457	0	0	0
Rampelli_2020	SRR9654987	F	Urban	Europe	Italy	71				0	0	0	0	0	0	0	0	0	0	0	0	0	0.000336022	0	0	0	0	0	0	0	0	0	0	0	0	0	0	0	0	0	0	0	0	0	0	0.0202295	0	0.00238237	0
Rampelli_2020	SRR9654988	M	Urban	Europe	Italy	76				0	0	0	0	0	0.000258909	0	0.000626392	0	0.000306236	0	0.000231997	0.000249157	0.000237703	0.000338053	0.000417595	0	0	0	0	0	0	0	0	0	0	0	0.000365395	0.000214151	0.000249958	0.000406118	0	0	0.000298348	0.00309716	0.000243597	0.000263897	0.000160613	0.000206891	0.000347996
Rampelli_2020	SRR9654989	F	Urban	Europe	Italy	76				0	0	0	0	0	0	0	0	0	0	0	0	0	0	0	0	0	0	0	0	0	0	0	0	0	0	0	0	0	0	0	0	0	0	0	0	0	0	0	0
Rampelli_2020	SRR9654990	F	Urban	Europe	Italy	107				0	0	0	0	0	0.000355089	0	0	0	0.000700175	0	0	0.000299345	0.000255104	0	0	0	0	0	0	0	0	0	0	0	0	0	0	0.000327005	0.00039526	0.00022346	0	0	0.000393432	0	0	0	0	0.000311722	0.000916896
Rampelli_2020	SRR9654991	F	Urban	Europe	Italy	109				0.000749304	0	0	0	0.000401413	0.000298651	0	0.00195354	0	0.000331835	0.000583873	0.000187326	0.000289443	0.000218403	0.000344068	0.000285449	0	0	0	0.00030329	0	0	0	0	0	0.00535217	0	0.000561978	0.000555803	0.000289478	0.000240848	0	0.000856348	0.000259045	0	0.000169485	0.000332281	0.000230555	0.000242314	0.00125776
Rampelli_2020	SRR9654992	F	Urban	Europe	Italy	107				0	0	0	0	0	0	0	0	0	0	0	0	0	0.00108007	0	0	0	0	0	0	0	0	0	0	0	0	0	0	0	0	0	0	0	0	0	0	0	0	0	0
Rampelli_2020	SRR9654993	M	Urban	Europe	Italy	32				0	0	0	0	0	0	0	0	0	0	0	0	0.000109869	0	0	0	0	0	0	0	0	0	0	0	0	0	0	0	0	0	0	0	0	0	0	0	0.0297619	0	0	0
Rampelli_2020	SRR9654994	F	Urban	Europe	Italy	30				0	0	0	0	0	0	0	0	0	0	0	0	0.000154338	0.00015798	0	0	0	0	0	0	0	0	0	0	0	0	0	0	0	0	0	0	0	0	0	0	0.0143035	0	0	0
Rampelli_2020	SRR9654995	F	Urban	Europe	Italy	32				0	0	0	0	0	0	0	0	0	0	0	0	0	0	0	0	0	0	0	0	0	0	0	0	0	0	0	0	0	0	0	0	0	0	0	0	0.0323834	0	0	0
Rampelli_2020	SRR9654996	M	Urban	Europe	Italy	22				0	0	0	0	0	0	0	0	0	0	0	0	0	0	0	0	0	0	0	0	0	0	0	0	0	0	0	0	0	0	0	0	0	0	0	0	0	0	0	0
Rampelli_2020	SRR9654997	F	Urban	Europe	Italy	109				0	0	0	0	0	0.01841	0	0	0	0	0	0	0	0	0	0	0	0	0	0	0	0	0	0	0	0	0	0	0	0	0	0	0	0	0	0	0	0	0	0
Rampelli_2020	SRR9654998	M	Urban	Europe	Italy	25				0	0	0	0	0	0	0	0	0	0	0	0	0	0	0	0	0	0	0	0	0	0	0	0	0	0	0	0	0	0	0	0	0	0	0	0	0	0	0	0
Rampelli_2020	SRR9654999	F	Urban	Europe	Italy	37				0	0	0	0	0	0.000348718	0	0	0	0	0	0	0.000290307	0.000250207	0	0	0	0	0	0	0	0	0.00547009	0	0	0	0	0	0	0.000771988	0.000463721	0	0	0.000608547	0	0	0	0	0.000428521	0
Rampelli_2020	SRR9655000	F	Urban	Europe	Italy	25				0	0	0	0	0	0	0	0	0	0	0	0	0.00081103	0	0	0	0	0	0	0	0	0	0	0	0	0	0	0	0	0	0	0	0	0	0	0	0	0	0	0
Rampelli_2020	SRR9655001	M	Urban	Europe	Italy	32				0	0	0	0	0	0	0	0	0	0	0	0	0.000453479	0.000205949	0	0	0	0	0	0	0	0	0	0	0	0	0	0	0	0	0	0	0	0	0	0	0	0	0	0
Rampelli_2020	SRR9655002	F	Urban	Europe	Italy	25				0	0	0	0	0	0	0	0	0	0	0	0	0	0	0	0	0	0	0	0	0	0	0	0	0	0	0	0	0	0	0	0	0	0	0	0	0.0416667	0	0	0
Rampelli_2020	SRR9655003	M	Urban	Europe	Italy	48				0	0	0	0	0	0	0	0	0	0	0	0	0	0	0	0	0	0	0	0	0	0	0	0	0	0	0	0	0	0	0	0	0	0	0	0	0	0	0.00332681	0
Rampelli_2020	SRR9655004	M	Urban	Europe	Italy	75				0	0	0	0	0	0	0	0	0	0	0	0	0	0	0	0	0	0	0	0	0	0	0	0	0	0	0	0	0	0	0	0	0	0	0	0	0	0	0	0
Rampelli_2020	SRR9655005	F	Urban	Europe	Italy	100				0	0	0	0	0	0	0	0	0	0	0	0	6.68891e-05	0	0	0	0	0	0	0	0	0	0	0	0	0	0	0	0	0	0	0	0	0	0	0	0.0343643	0	0	0
Rampelli_2020	SRR9655006	M	Urban	Europe	Italy	70				0	0	0	0	0	0	0	0	0	0	0	0	0	0.000136509	0	0	0	0	0	0	0	0	0	0	0	0	0	0	0	0	0	0	0	0.00100694	0	0	0.015191	0	0.00103453	0
Rampelli_2020	SRR9655007	M	Urban	Europe	Italy	75				0	0	0	0	0	0.000305164	0	0	0	0	0	0	0.000286526	0.000131332	0.00167673	0	0	0	0	0	0	0	0	0	0	0	0	0	0	0.000176687	0.000243482	0	0	0.000262128	0	0	0.000562402	0.00185085	5.62737e-05	0
Rampelli_2020	SRR9655008	F	Urban	Europe	Italy	102				0	0	0	0	0	0.000421053	0	0	0	0.0022291	0	0	0.000224477	0.000473135	0.00132685	0	0	0	0	0	0	0	0	0	0	0	0	0	0	9.98702e-05	0.000207496	0	0	0.00030547	0	0.000567595	0	0	0.000390178	0
Rampelli_2020	SRR9655009	F	Urban	Europe	Italy	100				0	0	0	0	0	0	0	0	0	0	0	0	0	0	0	0	0	0	0	0	0	0	0	0	0	0	0	0	0	0	0	0	0	0	0	0	0	0	0	0
Rampelli_2020	SRR9655010	M	Urban	Europe	Italy	104				0	0	0	0	0	0	0	0	0	0	0	0	0	0.000695217	0	0	0	0	0	0	0	0	0	0	0	0	0	0	0	0	0.00300807	0	0	0	0	0	0	0	0	0
Rampelli_2020	SRR9655011	F	Urban	Europe	Italy	99				0	0	0	0	0	0.000300515	0	0.00161879	0	0.000398473	0.000128296	0	0.000278804	0.00029139	0.000391357	0	0	0	0	0	0	0	0	0	0	0.00257347	0	0.000352814	0.000376761	0.000288321	0.000232707	0	0.00116221	0.000298301	0	0.000290553	0.000449665	8.94009e-05	0.000179677	0.000428911
Rampelli_2020	SRR9655012	M	Urban	Europe	Italy	106				0	0	0	0	0	0	0	0	0	0	0	0	0	0	0	0	0	0	0	0	0	0	0	0	0	0	0	0	0	0	0	0	0	0	0	0	0	0	0	0
Rampelli_2020	SRR9655013	F	Urban	Europe	Italy	106				0	0.00200121	0	0	0	0.00017592	0.000496424	0	0	0	0.00047809	0	0.000275577	0.000267041	0.000312481	0	0	0	0.00232699	0	0	0	0	0	0	0	0	0	0	0.000247712	0.000265623	0	0	0.00029258	0	0.000612774	0.000409162	6.44397e-05	0.00033311	0.000395588
Rampelli_2020	SRR9655014	F	Urban	Europe	Italy	107				0	0	0	0	0	0.000278422	0	0	0	0.000721836	0	0	0.000481935	0.000181394	0	0	0	0	0	0	0	0	0	0	0	0	0	0	0	0.00019127	9.59888e-05	0	0	0.000207957	0	0	0	0	5.12065e-05	0.000859328
Rampelli_2020	SRR9655015	M	Urban	Europe	Italy	105				0	0	0	0	0	0.000353635	0	0.000642285	0	0.000302252	0.000467116	0	0.000307645	0.00023263	0.000788014	0.000478565	0	0	0	0.000302252	0	0	0	0	0.00113344	0	0	0.000698957	0.000209251	0.000260002	0.000309085	0	0.00113344	0.000251876	0	0.000226689	0.000232986	0.000290627	0.000232382	0.00016372
Rampelli_2020	SRR9655016	M	Urban	Europe	Italy	65				0	0	0	0	0	0	0	0	0	0	0	0	0	0	0	0	0	0	0	0	0	0	0	0	0	0	0	0	0	0	0	0	0	0	0	0	0	0	0	0
Rampelli_2020	SRR9655017	M	Urban	Europe	Italy	76				0	0	0	0	0	0.000469692	0	0.00412567	0	0	0	0	0.000350305	0.000182994	0	0	0	0	0	0	0	0	0	0	0	0	0	0	0	0.000136499	0.000172184	0	0	0.000236962	0	0	0.000211573	0	0.000421697	0.00174548
Rampelli_2020	SRR9655018	F	Urban	Europe	Italy	109				0	0	0	0	0	0	0	0	0	0	0	0	0.000714776	0.000146225	0	0	0	0	0	0	0	0	0	0	0	0	0	0	0	0	0	0	0	0	0	0	0	0	0	0
Rampelli_2020	SRR9655019	M	Urban	Europe	Italy	105				0	0	0	0	0	0.000376671	0	0	0	0.00103281	0	0	0.000259421	0.00041278	0.000650929	0	0	0	0	0	0	0	0	0	0	0.0072904	0	0.00121507	0.000677633	0.000173114	0.000132494	0	0	0.000226812	0	0	0.000810045	0	0.000108191	0.00111381
Rampelli_2020	SRR9655020	F	Urban	Europe	Italy	101				0	0	0	0	0	0	0	0	0	0	0	0	0	0	0	0	0	0	0	0	0	0	0	0	0	0	0	0	0	0	0.0035461	0	0	0	0	0	0	0	0	0
Rampelli_2020	SRR9655021	F	Urban	Europe	Italy	100				0	0	0	0	0	0	0	0	0	0	0	0	0.00081103	0	0	0	0	0	0	0	0	0	0	0	0	0	0	0	0	0	0	0	0	0	0	0	0	0	0	0
Rampelli_2020	SRR9655022	F	Urban	Europe	Italy	101				0	0.00290549	0	0	0	0.000205093	0	0	0	0	0.000388434	0	0.000264891	0.00027773	0.000463901	0	0	0	0.00316185	0	0	0	0	0	0	0	0	0	0	0.000205828	0.000179093	0	0	0.000347519	0	0.000740614	0.000612431	0	0.000402694	0.000598188
Rampelli_2020	SRR9655023	F	Urban	Europe	Italy	100				0	0	0	0	0	0.000149134	0	0.00599201	0	0.000798935	0	0	0.00029871	0.000194365	0	0	0	0	0	0	0	0	0	0	0	0	0	0	0.000327768	0.00028922	0.000143072	0	0	0.000200621	0	0	0	0.000266312	0.000209766	0
Rampelli_2020	SRR9655024	F	Urban	Europe	Italy	99				0	0	0	0	0	0	0	0	0	0	0	0	0.000264466	0.00024419	0	0	0	0	0	0	0	0	0	0	0	0	0	0	0	0	0	0	0	0.000641822	0	0	0	0	0	0
Rampelli_2020	SRR9655025	F	Urban	Europe	Italy	101				0	0	0	0	0	0	0	0	0	0	0.00629544	0	0.000348348	0.000177845	0	0.00879362	0.0136026	0	0	0	0	0	0	0	0	0	0	0	0	0	0	0	0	0	0	0	0	0	0	0.00700742
Rampelli_2020	SRR9655026	F	Urban	Europe	Italy	99				0	0	0	0	0	0	0	0	0	0	0	0	0	0	0	0	0	0	0	0	0	0	0	0	0	0	0	0	0	0	0	0	0	0	0	0	0.0416667	0	0	0
Rampelli_2020	SRR9655027	F	Urban	Europe	Italy	98				0	0	0	0	0	0	0	0	0	0	0	0	0	0	0	0	0	0	0	0	0	0	0	0	0	0	0	0	0	0	0	0	0	0	0	0	0.0235215	0	0	0
Rampelli_2020	SRR9655028	F	Urban	Europe	Italy	99				0	0	0	0	0	0	0	0	0	0	0	0	0	0	0	0	0	0	0	0	0	0	0	0	0	0	0	0	0	0	0.000693802	0	0	0	0	0	0	0	0	0
Rampelli_2020	SRR9655029	F	Urban	Europe	Italy	100				0	0	0	0	0	0.000375898	0	0.00143726	0	0.00039801	0	0	0.000282179	0.000333235	0.000536998	0	0	0	0	0	0	0	0	0	0	0.0026534	0	0.00174129	0.000306162	0.000292445	0.000255813	0	0.00176893	0.000285978	0	0.000304035	0.000377741	0.000119063	0.0002037	0.000386954
Rampelli_2020	SRR9655030	M	Urban	Europe	Italy	105				0	0	0	0	0	0	0	0	0	0	0	0	0.000232148	0.000406925	0	0	0	0	0	0	0	0	0	0	0	0	0	0	0	0	0	0	0	0	0	0	0	0	0	0.00550459
Rampelli_2020	SRR9655031	F	Urban	Europe	Italy	46				0	0	0	0	0	0	0	0	0	0	0	0	0	0	0	0	0	0	0	0	0	0	0	0	0	0	0	0	0	0	0	0	0	0	0	0	0.0189934	0	0	0
Smits	SRR5763445	F	Rural	Africa	Tanzania	55				0	0	0	0	0	0	0	0	0	0	0	0	0	0.00115207	0	0	0	0	0	0	0	0	0	0	0	0	0	0	0	0	0.00227964	0	0	0	0	0	0	0	0	0
Smits	SRR5763446	F	Rural	Africa	Tanzania	7				0	0	0	0	0	0	0	0	0	0	0	0	0	0	0	0	0	0	0	0	0	0	0	0	0	0	0	0	0	0	0	0	0	0	0	0	0	0	0	0
Smits	SRR5763447		Rural	Africa	Tanzania	0				0	0	0	0	0	0	0	0	0	0	0	0	0	0	0	0	0	0	0	0	0	0	0	0	0	0	0	0	0	0	0	0	0	0	0	0	0	0	0	0
Smits	SRR5763448	M	Rural	Africa	Tanzania	0				0	0	0	0	0	0	0	0	0	0	0	0	0	0.00201613	0	0	0	0	0	0	0	0	0	0	0	0	0	0	0	0	0	0	0	0	0	0	0	0	0	0
Smits	SRR5763449		Rural	Africa	Tanzania	0				0	0	0	0	0	0	0	0	0	0	0	0	0	0	0	0	0	0	0	0	0	0	0	0	0	0	0	0	0	0	0	0	0	0	0	0	0	0	0	0
Smits	SRR5763450		Rural	Africa	Tanzania	0				0	0	0	0	0	0	0	0	0	0	0	0	0.000431005	0.000241935	0	0	0	0	0	0	0	0	0.04	0	0	0	0	0	0	0	0	0	0	0	0	0	0	0	0	0
Smits	SRR5763451		Rural	Africa	Tanzania	0				0	0	0	0	0	0	0	0	0	0	0	0	0	0	0	0	0	0	0	0	0	0	0	0	0	0	0	0	0	0	0	0	0	0	0	0	0	0	0	0
Smits	SRR5763452		Rural	Africa	Tanzania	0				0	0	0	0	0	0	0	0	0	0	0	0	0	0	0	0	0	0	0	0	0	0	0	0	0	0	0	0	0	0	0	0	0	0	0	0	0	0	0	0
Smits	SRR5763453	M	Rural	Africa	Tanzania	9				0	0	0	0	0	0	0	0	0	0	0	0	0.00081103	0	0	0	0	0	0	0	0	0	0	0	0	0	0	0	0	0	0	0	0	0	0	0	0	0	0	0
Smits	SRR5763454		Rural	Africa	Tanzania	0				0	0	0	0	0	0	0	0	0	0	0	0	0	0	0	0	0	0	0	0	0	0	0	0	0	0	0	0	0	0	0	0	0	0.00666667	0	0	0	0	0	0
Smits	SRR5763455	M	Rural	Africa	Tanzania	33				0	0	0	0	0	0	0	0	0	0	0	0	0	0	0	0	0	0	0	0	0	0	0	0	0	0	0	0	0	0	0	0	0	0	0	0	0	0	0	0
Smits	SRR5763456	F	Rural	Africa	Tanzania	48				0	0	0	0	0	0	0	0	0	0	0	0	0.000396504	0.00041816	0	0	0	0	0	0	0	0	0	0	0	0	0	0	0	0	0	0	0	0	0	0	0	0	0	0
Smits	SRR5763457	F	Rural	Africa	Tanzania	49				0	0	0	0	0	0	0	0	0	0	0	0	0	0	0	0	0	0	0	0	0	0	0	0	0	0	0	0	0	0	0	0	0	0	0	0	0	0	0	0
Smits	SRR5763458	F	Rural	Africa	Tanzania	55				0	0	0	0	0	0	0	0	0	0	0	0	0.000270012	0.000323272	0	0	0	0	0	0	0	0	0	0	0	0	0	0	0	0	0.000208339	0	0	0.000285598	0	0	0	0	9.22184e-05	0
Smits	SRR5763459	F	Rural	Africa	Tanzania	48				0	0	0	0	0	0	0	0	0	0	0	0	0	0	0	0	0	0	0	0	0	0	0	0	0	0	0	0	0	0	0	0	0	0	0	0	0	0	0	0
Smits	SRR5763460		Rural	Africa	Tanzania					0	0	0	0	0	0.000461712	0	0	0	0	0	0	0.000221024	0.000380295	0	0	0	0	0	0	0	0	0.00581832	0	0	0	0	0	0	9.68711e-05	0.000284527	0	0	0.000379129	0	0	0	0.000563063	0.000104128	0
Smits	SRR5763461		Rural	Africa	Tanzania					0	0	0	0	0	0	0	0	0	0	0	0	0	0	0	0	0	0	0	0	0	0	0	0	0	0	0	0	0	0	0	0	0	0	0	0	0	0	0	0
Smits	SRR5763462	F	Rural	Africa	Tanzania	6				0	0	0	0	0	0	0	0	0	0	0	0	0	0	0	0	0	0	0	0	0	0	0	0	0	0	0	0	0	0	0	0	0	0	0	0	0	0	0	0
Smits	SRR5763463	M	Rural	Africa	Tanzania	35				0	0	0	0	0	0	0	0	0	0	0	0	0	0.0010189	0	0	0	0	0	0	0	0	0	0	0	0	0	0	0	0	0	0	0	0	0	0	0	0	0	0
Smits	SRR5763464		Rural	Africa	Tanzania					0	0	0	0	0	0	0	0	0	0	0	0	0	0	0	0	0	0	0	0	0	0	0	0	0	0	0	0	0	0	0	0	0	0	0	0	0	0	0	0
Smits	SRR5763465		Rural	Africa	Tanzania					0	0	0	0	0	0	0	0	0	0	0	0	0	0	0	0	0	0	0	0	0	0	0	0	0	0	0	0	0	0	0	0	0	0	0	0	0	0	0	0
Smits	SRR5763466	M	Rural	Africa	Tanzania	40				0	0	0	0	0	0	0	0	0	0	0	0	0.000201612	0.000364498	0	0	0	0	0	0	0	0	0	0	0	0	0	0	0	0.00109349	0.000480827	0	0	0.000715631	0	0	0	0	0	0
Smits	SRR5763467	F	Rural	Africa	Tanzania	49				0	0	0	0	0	0	0	0	0	0	0	0	0	0	0	0	0	0	0	0	0	0	0	0	0	0	0	0	0	0	0	0	0	0	0	0	0	0	0	0
Smits	SRR5763468	M	Rural	Africa	Tanzania	40				0	0	0	0	0	0	0	0	0	0	0	0	0	0	0	0	0	0	0	0	0	0	0	0	0	0	0	0	0	0	0	0	0	0	0	0	0	0	0	0
Smits	SRR5763469	M	Rural	Africa	Tanzania	13				0	0	0	0	0	0	0	0	0	0	0	0	0	0	0	0	0	0	0	0	0	0	0	0	0	0	0	0	0	0	0	0	0	0	0	0	0	0	0	0
Smits	SRR5763470	M	Rural	Africa	Tanzania	13				0	0	0	0	0	0	0	0	0	0	0	0	0.000226124	9.74337e-05	0	0	0	0	0	0	0	0	0	0	0	0	0	0	0	0	0	0	0	0.000297398	0	0	0.00247831	0	0	0
Smits	SRR5763471	M	Rural	Africa	Tanzania	35				0	0	0	0	0	0	0	0	0	0	0	0	0.000284789	0	0	0	0	0	0	0	0	0	0	0	0	0	0	0	0	0	0	0	0	0	0	0	0	0	0	0
Smits	SRR5763472	F	Rural	Africa	Tanzania	5				0	0	0	0	0	0	0	0	0	0	0	0	6.90238e-05	0.000154427	0	0	0	0	0	0	0	0	0.0411348	0	0	0	0	0	0	0	0	0	0	0	0	0	0	0	0	0
Smits	SRR5763473	F	Rural	Africa	Tanzania	7				0	0	0	0	0	0	0	0	0	0	0	0	0.000163226	0.000278961	0	0	0	0	0	0	0	0	0.022362	0	0	0	0	0	0	0	0	0	0	0.000684836	0	0	0	0	0	0
Smits	SRR5763474	M	Rural	Africa	Tanzania	32				0	0	0	0	0	0	0	0	0	0	0	0	0	0	0	0	0	0	0	0	0	0	0	0	0	0	0	0	0	0	0	0	0	0	0	0	0	0	0	0
Smits	SRR5763475	M	Rural	Africa	Tanzania	35				0	0	0	0	0	0.000216802	0	0	0	0	0	0	0.000260233	0.000320177	0	0	0	0	0	0	0	0	0	0	0	0	0	0	0	0.000122388	0.000256588	0	0	0.000296296	0	0	0	0	0.000174481	0
Smits	SRR5763476	F	Rural	Africa	Tanzania	55				0	0	0	0	0	0.000144107	0	0	0	0	0	0	0.000244603	0.00034242	0	0	0	0	0	0	0	0	0.00394579	0	0	0	0	0	0	9.40791e-05	0.000197107	0	0	0.000236747	0	0	0	0.000673027	0.000264384	0
Smits	SRR5763477		Rural	Africa	Tanzania					0	0	0	0	0	0.000306924	0	0	0	0	0	0.000832739	0.00026687	0.000341058	0	0	0	0	0	0.00154651	0	0	0	0	0	0	0	0	0	8.82626e-05	0.000364481	0	0	0.000340233	0	0	0	0.0004667	0.000107555	0
Smits	SRR5763478	M	Rural	Africa	Tanzania	0				0	0	0	0	0	0	0	0	0	0	0	0	0	0	0	0	0	0	0	0	0	0	0	0	0	0	0	0	0	0	0	0	0	0	0	0	0	0	0	0
Smits	SRR5763479	M	Rural	Africa	Tanzania	40				0	0	0	0	0	0	0	0	0	0	0	0	0.000282097	0	0	0	0	0	0	0	0	0	0	0	0	0	0	0	0	0	0	0	0	0.000740741	0	0	0	0	0.00125736	0
Smits	SRR5763480	F	Rural	Africa	Tanzania	4				0	0	0	0	0	0	0	0	0	0	0	0	0.000182175	0.00038755	0	0	0	0	0	0	0	0	0.0338373	0	0	0	0	0	0	0	0	0	0	0.000662347	0	0	0	0	0	0
Smits	SRR5763481	F	Rural	Africa	Tanzania	6				0	0	0	0	0	0	0	0	0	0	0	0	0	0	0	0	0	0	0	0	0	0	0	0	0	0	0	0	0	0	0	0	0	0	0	0	0	0	0	0
Smits	SRR5763482	F	Rural	Africa	Tanzania	48				0	0	0	0	0	0	0	0	0	0	0	0	0	0	0	0	0	0	0	0	0	0	0	0	0	0	0	0	0	0	0	0	0	0	0	0	0	0	0	0
Smits	SRR5763483	M	Rural	Africa	Tanzania	12				0	0	0	0	0	0	0	0	0	0	0	0	0.00081103	0	0	0	0	0	0	0	0	0	0	0	0	0	0	0	0	0	0	0	0	0	0	0	0	0	0	0
Smits	SRR5763484	M	Rural	Africa	Tanzania	33				0	0	0	0	0	0	0	0	0	0	0	0	0	0	0	0	0	0	0	0	0	0	0.333333	0	0	0	0	0	0	0	0	0	0	0	0	0	0	0	0	0
Vatanen	SRR4305033	M		Europe	Russia	1.35068	carrying HLA alleles			0	0	0	0	0	0	0	0	0	0	0	0	0.00015421	0	0	0	0	0	0	0	0	0	0	0	0	0	0	0	0	0	0	0	0	0	0	0	0.0284624	0	0	0
Vatanen	SRR4305056	M	Urban	Europe	Finland	2.94521	carrying HLA alleles			0	0	0	0	0	0	0	0	0	0	0	0	0	0	0	0	0	0	0	0	0	0	0	0	0	0	0	0	0	0	0	0	0	0	0	0	0	0	0	0
Vatanen	SRR4305072	M		Europe	Russia	1.09589	carrying HLA alleles			0	0	0	0	0	0	0	0	0	0	0	0	0.00081103	0	0	0	0	0	0	0	0	0	0	0	0	0	0	0	0	0	0	0	0	0	0	0	0	0	0	0
Vatanen	SRR4305073	M		Europe	Russia	1.36438	carrying HLA alleles			0	0	0	0	0	0	0	0	0	0	0	0	0.00081103	0	0	0	0	0	0	0	0	0	0	0	0	0	0	0	0	0	0	0	0	0	0	0	0	0	0	0
Vatanen	SRR4305077	M		Europe	Russia	0.583562	carrying HLA alleles			0	0	0	0	0	0	0	0	0	0	0	0	0	0	0	0	0	0	0	0	0	0	0	0	0	0	0	0	0	0	0	0	0	0	0	0	0	0	0	0
Vatanen	SRR4305097	M		Europe	Russia	1.10959	carrying HLA alleles			0	0	0	0	0	0	0	0	0	0	0	0	0	0	0	0	0	0	0	0	0	0	0	0	0	0	0	0	0	0	0	0	0	0	0	0	0	0	0	0
Vatanen	SRR4305123	M		Europe	Estonia	1.10137	carrying HLA alleles			0	0	0	0	0	0	0	0	0	0	0	0	0	0	0	0	0	0	0	0	0	0	0	0	0	0	0	0	0	0	0	0	0	0	0	0	0	0	0.00625249	0
Vatanen	SRR4305144	M		Europe	Estonia	1.32877	carrying HLA alleles			0	0	0	0	0	0	0	0	0	0	0	0	0	0	0	0	0	0	0	0	0	0	0	0	0	0	0	0	0	0	0	0	0	0	0	0	0	0	0	0
Vatanen	SRR4305155	M		Europe	Estonia	1.86849	carrying HLA alleles			0	0	0	0	0	0	0	0	0	0	0	0	0.00081103	0	0	0	0	0	0	0	0	0	0	0	0	0	0	0	0	0	0	0	0	0	0	0	0	0	0	0
Vatanen	SRR4305161	F	Urban	Europe	Finland	1.86301	carrying HLA alleles			0	0	0	0	0	0	0	0	0	0	0	0	0	0	0	0	0	0	0	0	0	0	0	0	0	0	0	0	0	0	0	0	0	0	0	0	0.0416667	0	0	0
Vatanen	SRR4305166	F	Urban	Europe	Finland	1.31233	carrying HLA alleles			0	0	0	0	0	0	0	0	0	0	0	0	0	0	0	0	0	0	0	0	0	0	0	0	0	0	0	0	0	0	0	0	0	0	0	0	0	0	0	0
Vatanen	SRR4305176	M		Europe	Russia	0.561644	carrying HLA alleles			0	0	0	0	0	0	0	0	0	0	0	0	0	0	0	0	0	0	0	0	0	0	0	0	0	0	0	0	0	0	0	0	0	0	0	0	0	0	0	0
Vatanen	SRR4305186	M	Urban	Europe	Finland	1.58082	carrying HLA alleles			0	0	0	0	0	0	0	0	0	0	0	0	0	0	0	0	0	0	0	0	0	0	0	0	0	0	0	0	0	0.0107527	0	0	0	0	0	0	0	0	0	0
Vatanen	SRR4305187	M		Europe	Russia	0.545205	carrying HLA alleles			0	0	0	0	0	0	0	0	0	0	0	0	0	0	0	0	0	0	0	0	0	0	0	0	0	0	0	0	0	0	0	0	0	0	0	0	0	0	0	0
Vatanen	SRR4305190	F		Europe	Russia	1.09589	carrying HLA alleles			0	0	0	0	0	0	0	0	0	0	0	0	0	0	0	0	0	0	0	0	0	0	0	0	0	0	0	0	0	0	0	0	0	0	0	0	0.0416667	0	0	0
Vatanen	SRR4305197	M		Europe	Estonia	1.3726	carrying HLA alleles			0	0	0	0	0	0	0	0	0	0	0	0	0.00081103	0	0	0	0	0	0	0	0	0	0	0	0	0	0	0	0	0	0	0	0	0	0	0	0	0	0	0
Vatanen	SRR4305202	F	Urban	Europe	Finland	0.263014	carrying HLA alleles			0	0	0	0	0	0	0	0	0	0	0	0	0	0	0	0	0	0	0	0	0	0	0	0	0	0	0	0	0	0	0	0	0	0	0	0	0	0	0	0
Vatanen	SRR4305204	M	Urban	Europe	Finland	0.334247	carrying HLA alleles			0	0	0	0	0	0	0	0	0	0	0	0	0	0	0	0	0	0	0	0	0	0	0	0	0	0	0	0	0	0	0	0	0	0	0	0	0.0416667	0	0	0
Vatanen	SRR4305211	F	Urban	Europe	Finland	1.8137	carrying HLA alleles			0	0	0	0	0	0	0	0	0	0	0	0	0.00081103	0	0	0	0	0	0	0	0	0	0	0	0	0	0	0	0	0	0	0	0	0	0	0	0	0	0	0
Vatanen	SRR4305213	M	Urban	Europe	Finland	1.80822	carrying HLA alleles			0	0	0	0	0	0	0	0	0	0	0	0	0.00081103	0	0	0	0	0	0	0	0	0	0	0	0	0	0	0	0	0	0	0	0	0	0	0	0	0	0	0
Vatanen	SRR4305222	M		Europe	Russia	0.843836	carrying HLA alleles			0	0	0	0	0	0	0	0	0	0	0	0	0	0	0	0	0	0	0	0	0	0	0	0	0	0	0	0	0	0	0	0	0	0	0	0	0	0	0	0
Vatanen	SRR4305227	F		Europe	Russia	0.830137	carrying HLA alleles			0	0	0	0	0	0	0	0	0	0	0	0	0.00029466	0.000213347	0	0	0	0	0	0	0	0	0	0	0	0	0	0	0	0	0	0	0	0	0	0	0.00345385	0	0	0
Vatanen	SRR4305229	M		Europe	Estonia	2.36986	carrying HLA alleles			0	0	0	0	0	0	0	0	0	0	0	0	0.000608273	0	0	0	0	0	0	0	0	0	0	0	0	0	0	0	0	0	0	0	0	0	0	0	0	0	0	0
Vatanen	SRR4305241	F	Urban	Europe	Finland	1.56986	carrying HLA alleles			0	0	0	0	0	0	0	0	0	0	0	0	0	0	0	0	0	0	0	0	0	0	0	0	0	0	0	0	0	0	0	0	0	0	0	0	0.0416667	0	0	0
Vatanen	SRR4305254	F		Europe	Russia	1.30137	carrying HLA alleles			0	0	0	0	0	0	0	0	0	0	0	0	0	0	0	0	0	0	0	0	0	0	0	0	0	0	0	0	0	0	0	0	0	0	0	0	0	0	0	0
Vatanen	SRR4305266	M		Europe	Russia	1.01644	carrying HLA alleles			0	0	0	0	0	0	0	0	0	0	0	0	0	0	0	0	0	0	0	0	0	0	0	0	0	0	0	0	0	0	0	0	0	0	0	0	0.0403226	0	0	0
Vatanen	SRR4305267	M		Europe	Russia	0.479452	carrying HLA alleles			0	0	0	0	0	0	0	0	0	0	0	0	0	0	0	0	0	0	0	0	0	0	0	0	0	0	0	0	0	0	0	0	0	0	0	0	0	0	0	0
Vatanen	SRR4305270	M		Europe	Russia	0.791781	carrying HLA alleles			0	0	0	0	0	0	0	0	0	0	0	0	0	0	0	0	0	0	0	0	0	0	0	0	0	0	0	0	0	0	0	0	0	0	0	0	0	0	0	0
Vatanen	SRR4305272	M		Europe	Russia	0.249315	carrying HLA alleles			0	0	0	0	0	0	0	0	0	0	0	0	0	0	0	0	0	0	0	0	0	0	0	0	0	0	0	0	0	0	0	0	0	0	0	0	0	0	0	0
Vatanen	SRR4305280	M	Urban	Europe	Finland	1.07123	carrying HLA alleles			0	0	0	0	0	0	0	0	0	0	0	0	0	0	0	0	0	0	0	0	0	0	0	0	0	0	0	0	0	0	0	0	0	0	0	0	0	0	0	0
Vatanen	SRR4305285	M		Europe	Russia	0.50411	carrying HLA alleles			0	0	0	0	0	0	0	0	0	0	0	0	0	0	0	0	0	0	0	0	0	0	0	0	0	0	0	0	0	0	0	0	0	0	0	0	0	0	0	0
Vatanen	SRR4305286	M		Europe	Russia	0.421918	carrying HLA alleles			0	0	0	0	0	0	0	0	0	0	0	0	0	0	0	0	0	0	0	0	0	0	0	0	0	0	0	0	0	0	0	0	0	0	0	0	0	0	0	0
Vatanen	SRR4305287	M		Europe	Russia	0.6	carrying HLA alleles			0	0	0	0	0	0	0	0	0	0	0	0	0	0	0	0	0	0	0	0	0	0	0	0	0	0	0	0	0	0	0	0	0	0	0	0	0	0	0	0
Vatanen	SRR4305300	F		Europe	Estonia	1.33973	carrying HLA alleles			0	0	0	0	0	0	0	0	0	0	0	0	0.000327531	0	0	0	0	0	0	0	0	0	0	0	0	0	0	0	0	0	0	0	0	0	0	0	0.0248397	0	0	0
Vatanen	SRR4305303	F		Europe	Russia	1.10959	carrying HLA alleles			0	0	0	0	0	0	0	0	0	0	0	0	0	0	0	0	0	0	0	0	0	0	0	0	0	0	0	0	0	0	0	0	0	0	0	0	0.0416667	0	0	0
Vatanen	SRR4305311	M		Europe	Estonia	1.87123	carrying HLA alleles			0	0	0	0	0	0	0	0	0	0	0	0	0	0	0	0	0	0	0	0	0	0	0	0	0	0	0	0	0	0	0	0	0	0	0	0	0	0	0	0
Vatanen	SRR4305312	F		Europe	Russia	1.29589	carrying HLA alleles			0	0	0	0	0	0	0	0	0	0	0	0	0.00081103	0	0	0	0	0	0	0	0	0	0	0	0	0	0	0	0	0	0	0	0	0	0	0	0	0	0	0
Vatanen	SRR4305321	F	Urban	Europe	Finland	2.98356	carrying HLA alleles			0	0	0	0	0	0	0	0	0	0	0	0	0	0	0	0	0	0	0	0	0	0	0	0	0	0	0	0	0	0	0	0	0	0	0	0	0.0416667	0	0	0
Vatanen	SRR4305346	F		Europe	Russia	0.643836	carrying HLA alleles			0	0	0	0	0	0	0	0	0	0	0	0	0	0	0	0	0	0	0	0	0	0	0	0	0	0	0	0	0	0	0	0	0	0	0	0	0	0	0	0
Vatanen	SRR4305348	F		Europe	Russia	0.564384	carrying HLA alleles			0	0	0	0	0	0	0	0	0	0	0	0	0	0	0	0	0	0	0	0	0	0	0	0	0	0	0	0	0	0	0	0	0	0	0	0	0	0	0	0
Vatanen	SRR4305360	M		Europe	Russia	1.50137	carrying HLA alleles			0	0	0	0	0	0	0	0	0	0	0	0	0	0	0	0	0	0	0	0	0	0	0	0	0	0	0	0	0	0	0	0	0	0	0	0	0	0	0	0
Vatanen	SRR4305392	M		Europe	Estonia	1.35342	carrying HLA alleles			0	0	0	0	0	0	0	0	0	0	0	0	0.00081103	0	0	0	0	0	0	0	0	0	0	0	0	0	0	0	0	0	0	0	0	0	0	0	0	0	0	0
Vatanen	SRR4305405	M		Europe	Russia	0.432877	carrying HLA alleles			0	0	0	0	0	0	0	0	0	0	0	0	0	0	0	0	0	0	0	0	0	0	0	0	0	0	0	0	0	0	0	0	0	0	0	0	0	0	0	0
Vatanen	SRR4305421	M		Europe	Russia	1.05205	carrying HLA alleles			0	0	0	0	0	0	0	0	0	0	0	0	0	0.00164104	0	0	0	0	0	0	0	0	0	0	0	0	0	0	0	0	0	0	0	0	0	0	0	0	0	0
Vatanen	SRR4305425	M	Urban	Europe	Finland	1.95068	carrying HLA alleles			0	0	0	0	0	0	0	0	0	0	0	0	0	0	0	0	0	0	0	0	0	0	0	0	0	0	0	0	0	0	0	0	0	0	0	0	0.0416667	0	0	0
Vatanen	SRR4305428	M	Urban	Europe	Finland	1.08493	carrying HLA alleles			0	0	0	0	0	0	0	0	0	0	0	0	0.000342435	0	0	0	0	0	0	0	0	0	0	0	0	0	0	0	0	0	0	0	0	0	0	0	0	0	0	0
Vatanen	SRR4305430	M		Europe	Russia	2.35068	carrying HLA alleles			0	0	0	0	0	0	0	0	0	0	0	0	0	0	0	0	0	0	0	0	0	0	0	0	0	0	0	0	0	0	0	0	0	0	0	0	0.0416667	0	0	0
Vatanen	SRR4305431	M	Urban	Europe	Finland	2.30137	carrying HLA alleles			0	0	0	0	0	0	0	0	0	0	0	0	0.000310895	0	0	0	0	0	0	0	0	0	0	0	0	0	0	0	0	0	0	0	0	0	0	0	0.0256944	0	0	0
Vatanen	SRR4305432	M	Urban	Europe	Finland	2.33151	carrying HLA alleles			0	0	0	0	0	0	0	0	0	0	0	0	0.00081103	0	0	0	0	0	0	0	0	0	0	0	0	0	0	0	0	0	0	0	0	0	0	0	0	0	0	0
Vatanen	SRR4305433	M		Europe	Estonia	1.33973	carrying HLA alleles			0	0	0	0	0	0	0	0	0	0	0	0	0.000356334	0.000784306	0	0	0	0	0	0	0	0	0	0	0	0	0	0	0	0	0	0	0	0	0	0	0.00238368	0	0	0
Vatanen	SRR4305435	F		Europe	Russia	1.74795	carrying HLA alleles			0	0	0	0	0	0	0	0	0	0	0	0	0	0	0	0	0	0	0	0	0	0	0	0	0	0	0	0	0	0	0	0	0	0	0	0	0	0	0	0
Vatanen	SRR4305437	M		Europe	Estonia	1.3726	carrying HLA alleles			0	0	0	0	0	0	0	0	0	0	0	0	7.84868e-05	0	0	0	0	0	0	0	0	0	0	0	0	0	0	0	0	0	0	0	0	0	0	0	0.0376344	0	0	0
Vatanen	SRR4305438	M		Europe	Russia	1.63836	carrying HLA alleles			0	0	0	0	0	0	0	0	0	0	0	0	0	0	0	0	0	0	0	0	0	0	0	0	0	0	0	0	0	0	0	0	0	0	0	0	0	0	0	0
Vatanen	SRR4305442	M	Urban	Europe	Finland	1.37534	carrying HLA alleles			0	0	0	0	0	0	0	0	0	0	0	0	0.00081103	0	0	0	0	0	0	0	0	0	0	0	0	0	0	0	0	0	0	0	0	0	0	0	0	0	0	0
Vatanen	SRR4305444	M	Urban	Europe	Finland	1.86849	carrying HLA alleles			0	0	0	0	0	0	0	0	0	0	0	0	0	0	0	0	0	0	0	0	0	0	0	0	0	0	0	0	0	0	0	0	0	0	0	0	0.0416667	0	0	0
Vatanen	SRR4305445	M		Europe	Estonia	2.19452	carrying HLA alleles			0	0	0	0	0	0	0	0	0	0	0	0	0.000327863	0.000128689	0	0	0	0	0	0	0	0	0	0	0	0	0	0	0	0	0.000198053	0	0	0.000265957	0	0	0.0132979	0	0.000418974	0
Vatanen	SRR4305451	F		Europe	Russia	0.915068	carrying HLA alleles			0	0	0	0	0	0	0	0	0	0	0	0	0	0	0	0	0	0	0	0	0	0	0	0	0	0	0	0	0	0.0107527	0	0	0	0	0	0	0	0	0	0
Vatanen	SRR4305452	M		Europe	Russia	2.0137	carrying HLA alleles			0	0	0	0	0	0	0	0	0	0	0	0	7.272e-05	0	0	0	0	0	0	0	0	0	0	0	0	0	0	0	0	0	0	0	0	0	0	0	0.0285388	0	0	0
Vatanen	SRR4305453	F	Urban	Europe	Finland	1.33425	carrying HLA alleles			0	0	0	0	0	0	0	0	0	0	0	0	0	0	0	0	0	0	0	0	0	0	0	0	0	0	0	0	0	0	0	0	0	0.00217391	0	0	0.0280797	0	0	0
Vatanen	SRR4305454	M		Europe	Russia	1.98082	carrying HLA alleles			0	0	0	0	0	0	0	0	0	0	0	0	0.00081103	0	0	0	0	0	0	0	0	0	0	0	0	0	0	0	0	0	0	0	0	0	0	0	0	0	0	0
Vatanen	SRR4305455	M	Urban	Europe	Finland	3.01644	carrying HLA alleles			0	0	0	0	0	0	0	0	0	0	0	0	0.00081103	0	0	0	0	0	0	0	0	0	0	0	0	0	0	0	0	0	0	0	0	0	0	0	0	0	0	0
Vatanen	SRR4305456	M	Urban	Europe	Finland	2.34521	carrying HLA alleles			0	0	0	0	0	0	0	0	0	0	0	0	0	0	0	0	0	0	0	0	0	0	0	0	0	0	0	0	0	0	0	0	0	0	0	0	0	0	0	0
Vatanen	SRR4305460	F		Europe	Russia	0.980822	carrying HLA alleles			0	0	0	0	0	0	0	0	0	0	0	0	2.67413e-07	1.0475e-06	0	0	0	0	0	0	0	0	0	0	0	0	0	0	0	0.0107436	0	0	0	0	0	0	0	0	0	0
Vatanen	SRR4305461	F		Europe	Estonia	3.01918	carrying HLA alleles			0	0	0	0	0	0	0	0	0	0	0	0	0.000279207	0	0	0	0	0	0	0	0	0	0	0	0	0	0	0	0	0	0	0	0	0	0	0	0.0273224	0	0	0
Vatanen	SRR4305462	M	Urban	Europe	Finland	1.3863	carrying HLA alleles			0	0	0	0	0	0	0	0	0	0	0	0	0	0	0	0	0	0	0	0	0	0	0	0	0	0	0	0	0	0	0	0	0	0	0	0	0.0411523	0	0	0
Vatanen	SRR4305463	F		Europe	Russia	2	carrying HLA alleles			0	0	0	0	0	0	0	0	0	0	0	0	0	0	0	0	0	0	0	0	0	0	0	0	0	0	0	0	0	0	0	0	0	0	0	0	0	0	0	0
Vatanen	SRR4305465	M		Europe	Russia	1.58904	carrying HLA alleles			0	0	0	0	0	0	0	0	0	0	0	0	0	0	0	0	0	0	0	0	0	0	0	0	0	0	0	0	0	0	0	0	0	0	0	0	0.0416667	0	0	0
Vatanen	SRR4305466	F		Europe	Russia	2.40822	carrying HLA alleles			0	0	0	0	0	0	0	0	0	0	0	0	0.00081103	0	0	0	0	0	0	0	0	0	0	0	0	0	0	0	0	0	0	0	0	0	0	0	0	0	0	0
Vatanen	SRR4305470	M	Urban	Europe	Finland	1.56438	carrying HLA alleles			0	0	0	0	0	0	0	0	0	0	0	0	0	0	0	0	0	0	0	0	0	0	0	0	0	0	0	0	0	0	0	0	0	0	0	0	0	0	0	0
Vatanen	SRR4305473	F		Europe	Russia	1.43288	carrying HLA alleles			0	0	0	0	0	0	0	0	0	0	0	0	0.00081103	0	0	0	0	0	0	0	0	0	0	0	0	0	0	0	0	0	0	0	0	0	0	0	0	0	0	0
Vatanen	SRR4305474	M	Urban	Europe	Finland	1.33699	carrying HLA alleles			0	0	0	0	0	0	0	0	0	0	0	0	3.54287e-05	0	0	0	0	0	0	0	0	0	0	0	0	0	0	0	0	0	0	0	0	0	0	0	0.0398465	0	0	0
Vatanen	SRR4305481	M		Europe	Russia	0.756164	carrying HLA alleles			0	0	0	0	0	0	0	0	0	0	0	0	0	0	0	0	0	0	0	0	0	0	0	0	0	0	0	0	0	0	0	0	0	0	0	0	0	0	0	0
Vatanen	SRR4305482	M		Europe	Russia	1.85205	carrying HLA alleles			0	0	0	0	0	0	0	0	0	0	0	0	4.8912e-05	0	0	0	0	0	0	0	0	0	0	0	0	0	0	0	0	0	0	0	0	0	0	0	0.0391538	0	0	0
Vatanen	SRR4305484	F	Urban	Europe	Finland	1.31781	carrying HLA alleles			0	0	0	0	0	0	0	0	0	0	0	0	0.00081103	0	0	0	0	0	0	0	0	0	0	0	0	0	0	0	0	0	0	0	0	0	0	0	0	0	0	0
Vatanen	SRR4305530	F		Europe	Russia	3.01644	carrying HLA alleles			0	0	0	0	0	0	0	0	0	0.00107488	0	0	0.000455932	0.000130749	0	0	0	0	0	0	0	0	0	0	0	0	0	0	0	5.77894e-05	6.09863e-05	0	0	0.000262749	0	0	0.000373223	0	0.000100617	0
Vatanen	SRR4408001	M	Urban	Europe	Finland	3.03014	carrying HLA alleles			0	0	0	0	0	0	0	0	0	0	0	0	5.33413e-05	0	0	0	0	0	0	0	0	0	0	0	0	0	0	0	0	0	0	0	0	0	0	0	0.0373692	0	0	0
Vatanen	SRR4408005	M	Urban	Europe	Finland	1.08219	carrying HLA alleles			0	0	0	0	0	0	0	0	0	0	0	0	0	0	0	0	0	0	0	0	0	0	0	0	0	0	0	0	0	0	0	0	0	0	0	0	0	0	0	0
Vatanen	SRR4408007	M	Urban	Europe	Finland	2.24932	carrying HLA alleles			0	0	0	0	0	0	0	0	0	0	0	0	0.000671634	0	0	0	0	0	0	0	0	0	0	0	0	0	0	0	0	0	0	0	0	0	0	0	0	0	0	0
Vatanen	SRR4408017	F		Europe	Estonia	3.01096	carrying HLA alleles			0	0	0	0	0	0	0	0	0	0	0	0	0.00037212	0	0	0	0	0	0	0	0	0	0	0	0	0	0	0	0	0	0	0	0	0	0	0	0.022549	0	0	0
Vatanen	SRR4408018	M		Europe	Russia	1.00822	carrying HLA alleles			0	0	0	0	0	0	0	0	0	0	0	0	0	0	0	0	0	0	0	0	0	0	0	0	0	0	0	0	0	0	0	0	0	0	0	0	0	0	0	0
Vatanen	SRR4408023	M		Europe	Russia	1.3863	carrying HLA alleles			0	0	0	0	0	0	0	0	0	0	0	0	0	0	0	0	0	0	0	0	0	0	0	0	0	0	0	0	0	0	0	0	0	0	0	0	0	0	0	0
Vatanen	SRR4408028	M		Europe	Estonia	1.86849	carrying HLA alleles			0	0	0	0	0	0	0	0	0	0	0	0	0	0	0	0	0	0	0	0	0	0	0	0	0	0	0	0	0	0	0	0	0	0	0	0	0.0416667	0	0	0
Vatanen	SRR4408030	M	Urban	Europe	Finland	0.879452	carrying HLA alleles			0	0	0	0	0	0	0	0	0	0	0	0	0.000234595	0	0	0	0	0	0	0	0	0	0	0	0	0	0	0	0	0	0	0	0	0	0	0	0.0296143	0	0	0
Vatanen	SRR4408031	F	Urban	Europe	Finland	2.34247	carrying HLA alleles			0	0	0	0	0	0	0	0	0	0	0	0	0	0	0	0	0	0	0	0	0	0	0	0	0	0	0	0	0	0	0	0	0	0	0	0	0	0	0	0
Vatanen	SRR4408044	F	Urban	Europe	Finland	0.605479	carrying HLA alleles			0	0	0	0	0	0	0	0	0	0	0	0	0	0	0	0	0	0	0	0	0	0	0	0	0	0	0	0	0	0	0	0	0	0	0	0	0	0	0	0
Vatanen	SRR4408050	F		Europe	Estonia	1.32877	carrying HLA alleles			0	0	0	0	0	0	0	0	0	0	0	0	0	0	0	0	0	0	0	0	0	0	0	0	0	0	0	0	0	0	0	0	0	0	0	0	0	0	0	0
Vatanen	SRR4408051	M		Europe	Estonia	0.372603	carrying HLA alleles			0	0	0	0	0	0	0	0	0	0	0	0	0.000276095	0	0	0	0	0	0	0	0	0	0	0	0	0	0	0	0	0	0	0	0	0	0	0	0.0274823	0	0	0
Vatanen	SRR4408052	M	Urban	Europe	Finland	0.123288	carrying HLA alleles			0	0	0	0	0	0	0	0	0	0	0	0	0	0	0	0	0	0	0	0	0	0	0	0	0	0	0	0	0	0	0	0	0	0	0	0	0	0	0	0
Vatanen	SRR4408053	F	Urban	Europe	Finland	1.34795	carrying HLA alleles			0	0	0	0	0	0	0	0	0	0	0	0	0	0	0	0	0	0	0	0	0	0	0	0	0	0	0	0	0	0	0	0	0	0	0	0	0	0	0.00684932	0
Vatanen	SRR4408054	M		Europe	Russia	0.534247	carrying HLA alleles			0	0	0	0	0	0	0	0	0	0	0	0	0	0	0	0	0	0	0	0	0	0	0	0	0	0	0	0	0	0	0	0	0	0	0	0	0	0	0	0
Vatanen	SRR4408059	M	Urban	Europe	Finland	0.435616	carrying HLA alleles			0	0	0	0	0	0	0	0	0	0	0	0	0	0	0	0	0	0	0	0	0	0	0	0	0	0	0	0	0	0	0	0	0	0	0	0	0	0	0	0
Vatanen	SRR4408060	M		Europe	Estonia	1.09315	carrying HLA alleles			0	0	0	0	0	0	0	0	0	0	0	0	0.000103071	0	0	0	0	0	0	0	0	0	0	0	0	0	0	0	0	0	0	0	0	0	0	0	0.0363714	0	0	0
Vatanen	SRR4408061	F	Urban	Europe	Finland	1.01644	carrying HLA alleles			0	0	0	0	0	0	0	0	0	0	0	0	0	0	0	0	0	0	0	0	0	0	0	0	0	0	0	0	0	0	0	0	0	0	0	0	0	0	0	0
Vatanen	SRR4408063	M		Europe	Estonia	0.863014	carrying HLA alleles			0	0	0	0	0	0	0	0	0	0	0	0	3.40668e-05	0	0	0	0	0	0	0	0	0	0	0	0	0	0	0	0	0	0	0	0	0	0	0	0.0399165	0	0	0
Vatanen	SRR4408066	F	Urban	Europe	Finland	1.08493	carrying HLA alleles			0	0	0	0	0	0	0	0	0	0	0	0	0	0	0	0	0	0	0	0	0	0	0	0	0	0	0	0	0	0	0	0	0	0	0	0	0	0	0	0
Vatanen	SRR4408071	F		Europe	Russia	2.70685	carrying HLA alleles			0	0	0	0	0	0	0	0	0	0	0	0	0.000409243	0.000597219	0	0	0	0	0	0	0	0	0	0	0	0	0	0	0	0	0	0	0	0	0	0	0	0	0	0
Vatanen	SRR4408072	M		Europe	Estonia	0.29589	carrying HLA alleles			0	0	0	0	0	0	0	0	0	0	0	0	0	0	0	0	0	0	0	0	0	0	0	0	0	0	0	0	0	0	0	0	0	0	0	0	0	0	0	0
Vatanen	SRR4408074	F		Europe	Estonia	0.120548	carrying HLA alleles			0	0	0	0	0	0	0	0	0	0	0	0	0	0	0	0	0	0	0	0	0	0	0	0	0	0	0	0	0	0	0	0	0	0	0	0	0.0416667	0	0	0
Vatanen	SRR4408077	F		Europe	Estonia	0.112329	carrying HLA alleles			0	0	0	0	0	0	0	0	0	0	0	0	0.00081103	0	0	0	0	0	0	0	0	0	0	0	0	0	0	0	0	0	0	0	0	0	0	0	0	0	0	0
Vatanen	SRR4408078	M	Urban	Europe	Finland	0.619178	carrying HLA alleles			0	0	0	0	0	0	0	0	0	0	0	0	0	0	0	0	0	0	0	0	0	0	0	0	0	0	0	0	0	0	0	0	0	0	0	0	0.00360577	0	0	0
Vatanen	SRR4408081	M		Europe	Estonia	0.484932	carrying HLA alleles			0	0	0	0	0	0	0	0	0	0	0	0	6.97524e-05	0	0	0	0	0	0	0	0	0	0	0	0	0	0	0	0	0	0	0	0	0	0	0	0.0358353	0	0	0
Vatanen	SRR4408084	F	Urban	Europe	Finland	0.115068	carrying HLA alleles			0	0	0	0	0	0	0	0	0	0	0	0	0	0	0	0	0	0	0	0	0	0	0	0	0	0	0	0	0	0	0	0	0	0	0	0	0	0	0	0
Vatanen	SRR4408085	M	Urban	Europe	Finland	0.326027	carrying HLA alleles			0	0	0	0	0	0	0	0	0	0	0	0	0	0	0	0	0	0	0	0	0	0	0	0	0	0	0	0	0	0	0	0	0	0	0	0	0	0	0	0
Vatanen	SRR4408090	M	Urban	Europe	Finland	0.591781	carrying HLA alleles			0	0	0	0	0	0	0	0	0	0	0	0	0	0	0	0	0	0	0	0	0	0	0	0	0	0	0	0	0	0	0	0	0	0	0	0	0.0416667	0	0	0
Vatanen	SRR4408091	M		Europe	Estonia	1.82466	carrying HLA alleles			0	0	0	0	0	0	0	0	0	0	0	0	0.00081103	0	0	0	0	0	0	0	0	0	0	0	0	0	0	0	0	0	0	0	0	0	0	0	0	0	0	0
Vatanen	SRR4408095	M		Europe	Estonia	0.328767	carrying HLA alleles			0	0	0	0	0	0	0	0	0	0	0	0	0	0	0	0	0	0	0	0	0	0	0	0	0	0	0	0	0	0	0	0	0	0	0	0	0.0416667	0	0	0
Vatanen	SRR4408096	M		Europe	Estonia	1.85753	carrying HLA alleles			0	0	0	0	0	0	0	0	0	0	0	0	0.000637346	0	0	0	0	0	0	0	0	0	0	0	0	0	0	0	0.00701905	0	0	0	0	0	0	0	0.00294848	0	0	0
Vatanen	SRR4408097	F		Europe	Estonia	0.591781	carrying HLA alleles			0	0	0	0	0	0	0	0	0	0	0	0	0	0	0	0	0	0	0	0	0	0	0	0	0	0	0	0	0	0	0	0	0	0	0	0	0	0	0	0
Vatanen	SRR4408098	M	Urban	Europe	Finland	0.539726	carrying HLA alleles			0	0	0	0	0	0	0	0	0	0	0	0	0	0	0	0	0	0	0	0	0	0	0	0	0	0	0	0	0	0	0	0	0	0	0	0	0.0416667	0	0	0
Vatanen	SRR4408106	M	Urban	Europe	Finland	0.287671	carrying HLA alleles			0	0	0	0	0	0	0	0	0	0	0	0	0	0	0	0	0	0	0	0	0	0	0	0	0	0	0	0	0	0	0	0	0	0	0	0	0.0416667	0	0	0
Vatanen	SRR4408107	M		Europe	Estonia	0.873973	carrying HLA alleles			0	0	0	0	0	0	0	0	0	0	0	0	5.1174e-05	0	0	0	0	0	0	0	0	0	0	0	0	0	0	0	0	0	0	0	0	0	0	0	0.0390376	0	0	0
Vatanen	SRR4408117	M		Europe	Estonia	0.169863	carrying HLA alleles			0	0	0	0	0	0	0	0	0	0	0	0	0.00024442	0	0	0	0	0	0	0	0	0	0	0	0	0	0	0	0	0	0	0	0	0	0	0	0.0291096	0	0	0
Vatanen	SRR4408119	M		Europe	Russia	2.47123	carrying HLA alleles			0	0	0	0	0	0	0	0	0	0	0	0	0	0	0	0	0	0	0	0	0	0	0	0	0	0	0	0	0	0	0	0	0	0	0	0	0.0416667	0	0	0
Vatanen	SRR4408120	F		Europe	Russia	1.50685	carrying HLA alleles			0	0	0	0	0	0	0	0	0	0	0	0	0.00081103	0	0	0	0	0	0	0	0	0	0	0	0	0	0	0	0	0	0	0	0	0	0	0	0	0	0	0
Vatanen	SRR4408121	F		Europe	Estonia	1.6137	carrying HLA alleles			0	0	0	0	0	0	0	0	0	0	0	0	0	0	0	0	0	0	0	0	0	0	0	0	0	0	0	0	0	0	0	0	0	0	0	0	0.0416667	0	0	0
Vatanen	SRR4408122	F	Urban	Europe	Finland	0.873973	carrying HLA alleles			0	0	0	0	0	0	0	0	0	0	0	0	0	0	0	0	0	0	0	0	0	0	0	0	0	0	0	0	0	0	0	0	0	0	0	0	0.0416667	0	0	0
Vatanen	SRR4408125	F	Urban	Europe	Finland	0.142466	carrying HLA alleles			0	0	0	0	0	0	0	0	0	0	0	0	0.00081103	0	0	0	0	0	0	0	0	0	0	0	0	0	0	0	0	0	0	0	0	0	0	0	0	0	0	0
Vatanen	SRR4408127	F		Europe	Estonia	0.331507	carrying HLA alleles			0	0	0	0	0	0	0	0	0	0	0	0	0	0	0	0	0	0	0	0	0	0	0	0	0	0	0	0	0	0	0	0	0	0	0	0	0	0	0	0
Vatanen	SRR4408128	M	Urban	Europe	Finland	0.854795	carrying HLA alleles			0	0	0	0	0	0	0	0	0	0	0	0	0.00081103	0	0	0	0	0	0	0	0	0	0	0	0	0	0	0	0	0	0	0	0	0	0	0	0	0	0	0
Vatanen	SRR4408133	F	Urban	Europe	Finland	1.35068	carrying HLA alleles			0	0	0	0	0	0	0	0	0	0	0	0	0.00081103	0	0	0	0	0	0	0	0	0	0	0	0	0	0	0	0	0	0	0	0	0	0	0	0	0	0	0
Vatanen	SRR4408134	F	Urban	Europe	Finland	0.334247	carrying HLA alleles			0	0	0	0	0	0	0	0	0	0	0	0	0	0	0	0	0	0	0	0	0	0	0	0	0	0	0	0	0	0	0	0	0	0	0	0	0	0	0	0
Vatanen	SRR4408135	M	Urban	Europe	Finland	0.569863	carrying HLA alleles			0	0	0	0	0	0	0	0	0	0	0	0	0	0	0	0	0	0	0	0	0	0	0	0	0	0	0	0	0	0	0	0	0	0	0	0	0	0	0	0
Vatanen	SRR4408141	F	Urban	Europe	Finland	0.939726	carrying HLA alleles			0	0	0	0	0	0	0	0	0	0	0	0	0	0	0	0	0	0	0	0	0	0	0	0	0	0	0	0	0	0	0	0	0	0	0	0	0	0	0	0
Vatanen	SRR4408142	F	Urban	Europe	Finland	1.50411	carrying HLA alleles			0	0	0	0	0	0	0	0	0	0	0	0	0	0	0	0	0	0	0	0	0	0	0	0	0	0	0	0	0	0	0	0	0	0	0	0	0	0	0	0
Vatanen	SRR4408149	M	Urban	Europe	Finland	0.372603	carrying HLA alleles			0	0	0	0	0	0	0	0	0	0	0	0	0	0	0	0	0	0	0	0	0	0	0	0	0	0	0	0	0	0	0	0	0	0	0	0	0	0	0	0
Vatanen	SRR4408150	M		Europe	Russia	1.00548	carrying HLA alleles			0	0	0	0	0	0	0	0	0	0	0	0	0.00081103	0	0	0	0	0	0	0	0	0	0	0	0	0	0	0	0	0	0	0	0	0	0	0	0	0	0	0
Vatanen	SRR4408151	F		Europe	Russia	1.00274	carrying HLA alleles			0	0	0	0	0	0	0	0	0	0	0	0	0	0	0	0	0	0	0	0	0	0	0	0	0	0	0	0	0	0	0	0	0	0	0	0	0	0	0	0
Vatanen	SRR4408152	F	Urban	Europe	Finland	0.331507	carrying HLA alleles			0	0	0	0	0	0	0	0	0	0	0	0	0	0	0	0	0	0	0	0	0	0	0	0	0	0	0	0	0	0	0	0	0	0	0	0	0	0	0	0
Vatanen	SRR4408154	M		Europe	Estonia	2.3589	carrying HLA alleles			0	0	0	0	0	0	0	0	0	0	0	0	0.000186035	0.00030138	0	0	0	0	0	0	0	0	0	0	0	0	0	0	0	0	0	0	0	0	0	0	0.0193299	0	0	0
Vatanen	SRR4408159	M	Urban	Europe	Finland	0.128767	carrying HLA alleles			0	0	0	0	0	0	0	0	0	0	0	0	0	0	0	0	0	0	0	0	0	0	0	0	0	0	0	0	0	0	0	0	0	0	0	0	0	0	0	0
Vatanen	SRR4408200	M		Europe	Russia	0.786301	carrying HLA alleles			0	0	0	0	0	0	0	0	0	0	0	0	0	0	0	0	0	0	0	0	0	0	0	0	0	0	0	0	0	0	0	0	0	0	0	0	0	0	0	0
Vatanen	SRR4408207	F	Urban	Europe	Finland	0.583562	carrying HLA alleles			0	0	0	0	0	0	0	0	0	0	0	0	0	0	0	0	0	0	0	0	0	0	0	0	0	0	0	0	0	0	0	0	0	0	0	0	0	0	0	0
Vatanen	SRR4408208	M		Europe	Estonia	0.893151	carrying HLA alleles			0	0	0	0	0	0	0	0	0	0	0	0	0	0	0	0	0	0	0	0	0	0	0	0	0	0	0	0	0	0.0014952	0	0	0	0	0	0	0.0339004	0	0	0
Vatanen	SRR4408211	M		Europe	Russia	1.01096	carrying HLA alleles			0	0	0	0	0	0	0	0	0	0	0	0	0	0	0	0	0	0	0	0	0	0	0	0	0	0	0	0	0	0	0	0	0	0	0	0	0	0	0	0
Vatanen	SRR4408216	M		Europe	Russia	1.30685	carrying HLA alleles			0	0	0	0	0	0	0	0	0	0	0	0	0	0.000856855	0	0	0	0	0	0	0	0	0	0	0	0	0	0	0	0	0	0	0	0	0	0	0	0	0	0
Vatanen	SRR4408218	F		Europe	Russia	1.91507	carrying HLA alleles			0	0	0	0	0	0	0	0	0	0	0	0	0.000362947	0	0	0	0	0	0	0	0	0	0	0	0	0	0	0	0	0	0	0	0	0	0	0	0	0	0	0
Vatanen	SRR4408219	M	Urban	Europe	Finland	1.58356	carrying HLA alleles			0	0	0	0	0	0	0	0	0	0	0	0	0	0	0	0	0	0	0	0	0	0	0	0	0	0	0	0	0	0	0	0	0	0	0	0	0	0	0	0
Vatanen	SRR4408220	M		Europe	Estonia	2.36438	carrying HLA alleles			0	0	0	0	0	0	0	0	0	0	0	0	0.000332389	0	0	0	0	0	0	0	0	0	0	0	0	0	0	0	0	0	0	0	0	0	0	0	0	0	0	0
Vatanen	SRR4408223	M	Urban	Europe	Finland	1.36438	carrying HLA alleles			0	0	0	0	0	0	0	0	0	0	0	0	0.00081103	0	0	0	0	0	0	0	0	0	0	0	0	0	0	0	0	0	0	0	0	0	0	0	0	0	0	0
Vatanen	SRR4408232	M		Europe	Russia	0.873973	carrying HLA alleles			0	0	0	0	0	0	0	0	0	0	0	0	0.00081103	0	0	0	0	0	0	0	0	0	0	0	0	0	0	0	0	0	0	0	0	0	0	0	0	0	0	0
Vatanen	SRR4408233	F		Europe	Russia	1.37808	carrying HLA alleles			0	0	0	0	0	0	0	0	0	0	0	0	7.05992e-05	0	0	0	0	0	0	0	0	0	0	0	0	0	0	0	0	0	0	0	0	0	0	0	0.0380396	0	0	0
Vatanen	SRR4408240	F		Europe	Estonia	1.24932	carrying HLA alleles			0	0	0	0	0	0	0	0	0	0	0	0	0	0.000969589	0	0	0	0	0	0	0	0	0	0	0	0	0	0	0	0	0	0	0	0	0	0	0	0	0	0
Vatanen	SRR4408243	M	Urban	Europe	Finland	1.09315	carrying HLA alleles			0	0	0	0	0	0	0	0	0	0	0	0	0.00081103	0	0	0	0	0	0	0	0	0	0	0	0	0	0	0	0	0	0	0	0	0	0	0	0	0	0	0
Vatanen	SRR4408246	M		Europe	Estonia	2.40548	carrying HLA alleles			0	0	0	0	0	0	0	0	0	0	0	0	0.000109313	0	0	0	0	0	0	0	0	0	0	0	0	0	0	0	0	0	0	0	0	0	0	0	0.0307971	0	0	0
Vatanen	SRR4408253	F		Europe	Russia	1.50685	carrying HLA alleles			0	0	0	0	0	0	0	0	0	0	0	0	0.000464597	0.000113491	0	0	0	0	0	0	0	0	0	0	0	0	0	0	0	0	0	0	0	0	0	0	0.0125552	0	0.000476277	0
Vatanen	SRR4408254	F		Europe	Estonia	1.61644	carrying HLA alleles			0	0	0	0	0	0	0	0	0	0	0	0	2.87211e-05	0	0	0	0	0	0	0	0	0	0	0	0	0	0	0	0	0	0	0	0	0	0	0	0.0337268	0	0	0
Vatanen	SRR4408257	F	Urban	Europe	Finland	3.03836	carrying HLA alleles			0	0	0	0	0	0	0	0	0	0	0	0	0.00081103	0	0	0	0	0	0	0	0	0	0	0	0	0	0	0	0	0	0	0	0	0	0	0	0	0	0	0
Vatanen	SRR4408260	F		Europe	Estonia	0.857534	carrying HLA alleles			0	0	0	0	0	0	0	0	0	0	0	0	0	0	0	0	0	0	0	0	0	0	0	0	0	0	0	0	0	0	0	0	0	0	0	0	0.0411959	0	0	0
Vatanen	SRR4408268	M		Europe	Russia	2.04658	carrying HLA alleles			0	0	0	0	0	0	0	0	0	0	0	0	0.000466522	0	0	0	0	0	0	0	0	0	0	0	0	0	0	0	0	0	0	0	0	0	0	0	0.0176991	0	0	0
Vatanen	SRR4408272	M		Europe	Russia	2.28219	carrying HLA alleles			0	0	0	0	0	0	0	0	0	0	0	0	0	0.000342453	0	0	0	0	0	0	0	0	0	0	0	0	0	0	0	0	0	0	0	0	0	0	0.0189394	0	0	0
Vatanen	SRR4408273	M		Europe	Estonia	1.35068	carrying HLA alleles			0	0	0	0	0	0	0	0	0	0	0	0	0.000155553	0	0	0	0	0	0	0	0	0	0	0	0	0	0	0	0	0	0	0	0	0	0	0	0.0336751	0	0	0
Vatanen	SRR4408276	F		Europe	Russia	1.68493	carrying HLA alleles			0	0	0	0	0	0	0	0	0	0	0	0	0.000501558	0	0	0	0	0	0	0	0	0	0	0	0	0	0	0	0	0	0	0	0	0	0	0	0.0158991	0	0	0
Vatanen	SRR4408279	F		Europe	Russia	1.31781	carrying HLA alleles			0	0	0	0	0	0	0	0	0	0	0	0	0	0	0	0	0	0	0	0	0	0	0	0	0	0	0	0	0	0	0	0	0	0	0	0	0.0293603	0	0	0
Vatanen	SRR4408286	F		Europe	Russia	1.41918	carrying HLA alleles			0	0	0	0	0	0	0	0	0	0	0	0	0.000726974	0	0	0	0	0	0	0	0	0	0	0	0	0	0	0	0	0	0	0	0	0	0	0	0.00431839	0	0	0
Vatanen	SRR4408287	F	Urban	Europe	Finland	1.32877	carrying HLA alleles			0	0	0	0	0	0	0	0	0	0	0	0	3.08445e-05	0	0	0	0	0	0	0	0	0	0	0	0	0	0	0	0	0	0	0	0	0	0	0	0.040082	0	0	0
Vatanen	SRR4408288	M		Europe	Russia	1.53699	carrying HLA alleles			0	0	0	0	0	0	0	0	0	0	0	0	0	0	0	0	0	0	0	0	0	0	0	0	0	0	0	0	0	0	0	0	0	0	0	0	0.040011	0	0	0
Vatanen	SRR4408291	F		Europe	Russia	1.81644	carrying HLA alleles			0	0	0	0	0	0	0	0	0	0	0	0	0.000309696	0.000529322	0	0	0	0	0	0	0	0	0	0	0	0	0	0	0	0	0	0	0	0	0	0	0	0	0.000147856	0
Vatanen	SRR4408292	F		Europe	Estonia	1.84384	carrying HLA alleles			0	0	0	0	0	0	0	0	0	0	0	0	0.00081103	0	0	0	0	0	0	0	0	0	0	0	0	0	0	0	0	0	0	0	0	0	0	0	0	0	0	0
Vatanen	SRR4408293	M	Urban	Europe	Finland	2.99452	carrying HLA alleles			0	0	0	0	0	0	0	0	0	0	0	0	0.00081103	0	0	0	0	0	0	0	0	0	0	0	0	0	0	0	0	0	0	0	0	0	0	0	0	0	0	0
Zeller	CCIS00146684ST-4-0	F		Europe	France	72	Normal	25	overweight	0	0	0	0	0	0	0	0	0	0	0	0	0.000307654	6.52871e-05	0	0	0	0.00179902	0	0	0	0	0	0	0	0	0	0	0	0.00057204	0	0	0	0.000328964	0	0	0.00514007	0	0	0
Zeller	CCIS00281083ST-3-0	M		Europe	France	53	Normal	32	obesity	0	0	0	0	0	0	0	0	0	0	0	0	0	0	0	0	0	0	0	0	0	0	0	0	0	0	0	0	0	0	0	0	0	0	0	0	0.0348837	0	0	0
Zeller	CCIS02124300ST-4-0	M		Europe	France	35	Normal	23	normal	0	0	0	0	0	0	0	0	0	0	0	0	6.28197e-05	0	0	0	0	0	0	0	0	0	0	0	0	0	0	0	0	0	0	0	0	0	0	0	0.00529865	0	0.00427587	0
Zeller	CCIS02379307ST-4-0	M		Europe	France	67	Cancer	28	overweight	0	0	0	0	0	0	0	0	0	0	0	0	0.000110068	0	0	0	0	0	0	0	0	0	0	0	0	0	0	0	0	0	0	0	0	0	0	0	0.0282738	0	0	0
Zeller	CCIS02856720ST-4-0	M		Europe	France	74	Normal	27	overweight	0	0	0	0	0	0	0	0	0	0	0	0	0.000105354	0	0	0	0	0	0	0	0	0	0	0	0	0	0	0	0	0	0	0	0	0	0	0	0.0234886	0	0.00125907	0
Zeller	CCIS03473770ST-4-0	M		Europe	France	29	Normal	24.49	normal	0	0	0	0	0	0	0	0	0	0.00286738	0	0	0.000337929	0.000220401	0	0	0	0	0	0	0	0	0	0	0	0	0	0	0	0.00015416	0	0	0	0.000489845	0	0	0.00235215	0	0	0.00238949
Zeller	CCIS03857607ST-4-0	M		Europe	France	61	Normal	23	normal	0	0	0	0	0	0	0	0	0	0	0	0	0.000216712	0.000146924	0	0	0	0	0	0	0	0	0	0	0	0	0	0	0	0	0	0	0	0	0	0	0.00387989	0	0	0
Zeller	CCIS05314658ST-4-0	F		Europe	France	65	Normal	24	normal	0	0	0	0	0	0	0	0	0	0	0	0	0.000212426	0.000218115	0	0	0	0	0	0	0	0.00384342	0	0	0	0	0	0	0	0.000198982	4.54305e-05	0	0	0.000289442	0	0	0.0115658	0.000875992	0.000633744	0
Zeller	CCIS06260551ST-3-0	M		Europe	France	58	Cancer	24	normal	0.000805338	0	0	0	0.000431431	0.000390014	0	0.0010642	0.000488955	0.000253106	0.000251015	0.000153398	0.000277497	0.000264774	0.000320492	0.000594416	0	0	0	0.000632766	0	0.000195582	0.000306796	0	0	0.00109296	0	0.000503336	0.00034072	0.000287621	0.000262836	0	0.000862862	0.000259242	0	0.000191747	0.000285224	0.000212397	0.000302987	0.000373907
Zeller	CCIS07277498ST-4-0	M		Europe	France	63	Normal			0	0	0	0	0	0	0	0	0	0	0	0	0.000140969	0	0	0	0	0	0	0	0	0	0	0	0	0	0	0	0	0	0	0	0	0	0	0	0.0244545	0	0	0
Zeller	CCIS07539127ST-4-0	F		Europe	France	77	Normal	22	normal	0	0	0	0	0	0	0	0	0	0.00107839	0.00116889	0	0.000320914	0.00019484	0	0	0	0	0.00394027	0	0	0	0	0	0	0	0	0	0	0	0	0	0	0.000171436	0	0	0.00760404	0	0.000525559	0.00138255
Zeller	CCIS07648107ST-4-0	F		Europe	France	62	Normal	21	normal	0	0	0	0	0	0	0	0	0	0	0	0	6.12098e-05	0	0	0	0	0	0	0	0	0	0	0	0	0	0	0	0	0	0	0	0	0	0	0	0.0314465	0	0	0
Zeller	CCIS08668806ST-3-0	M		Europe	France	63	Small adenoma	26	overweight	0	0	0	0	0	0	0	0	0	0	0	0	0.000278237	0	0	0	0	0	0	0	0	0	0	0	0	0	0	0	0	0.00125579	0	0	0.167883	0	0	0	0.0155109	0	0	0
Zeller	CCIS09568613ST-4-0	M		Europe	France	67	Normal	21	normal	0	0	0	0	0	0	0	0	0	0	0	0	0.000436708	0.000159933	0	0	0	0	0	0	0	0	0	0	0	0	0	0	0	0	0	0	0	0	0	0	0.00961538	0	0	0
Zeller	CCIS10706551ST-3-0	M		Europe	France	25	Normal	24.15	normal	0	0	0	0	0	0	0	0	0	0	0	0	0	0	0	0	0	0	0	0	0	0	0	0	0	0	0	0	0	0	0	0	0	0	0	0	0.0385528	0	0	0
Zeller	CCIS10793554ST-4-0	M		Europe	France	64	Small adenoma	26	overweight	0	0	0	0	0	0	0	0	0	0	0	0	0.000131518	0	0	0	0	0	0	0	0	0	0	0	0	0	0	0	0	0	0	0	0	0	0	0	0.0243994	0	0	0
Zeller	CCIS11015875ST-4-0	M		Europe	France	62	Cancer	26	overweight	0	0	0	0	0	0	0	0	0	0	0	0	0.000112928	6.38016e-05	0	0	0	0	0	0	0	0	0	0	0	0	0	0	0	0	0	0	0	0.000179325	0	0	0.00336234	0	0.000162563	0
Zeller	CCIS11019776ST-4-0	M		Europe	France	58	Large adenoma	22	normal	0	0	0	0	0.0189284	0	0	0	0	0	0	0	0.000245151	0	0	0	0	0	0	0	0	0	0	0	0	0	0	0	0.00228484	0.000325649	0.00028501	0	0	0.000314502	0	0	0	0	0.000247325	0
Zeller	CCIS11354283ST-4-0	M		Europe	France	67	Normal	27	overweight	0	0	0	0	0	0.000148004	0	0	0	0	0.00037178	0.000486855	0.000266763	0.000210447	0.000417304	0	0	0.000454398	0	0.00097371	0	0	0	0	0.00350536	0	0	0	0	0.00028269	0.000276575	0	0	0.00024148	0	0	0.00163908	0.000299603	0.000209414	0
Zeller	CCIS11362406ST-4-0	F		Europe	France	44	Normal	26	overweight	0	0.00142967	0	0	0	0.000218535	0.00095311	0	0	0	0.000306357	0.000178708	0.000277079	0.000252724	0.000335534	0	0	0.000153178	0.000536125	0.000272317	0	0	0	0	0.00122543	0	0	0	0	0.000209179	0.000336232	0	0	0.000264148	0	0.000212748	0.000285082	0.000271008	0.000274882	0.000229768
Zeller	CCIS11558985ST-4-0	F		Europe	France	56	Normal			0	0	0	0	0	0	0	0	0	0	0	0	0.000193102	0	0	0	0	0	0	0	0	0	0	0	0	0	0	0	0	0	0	0	0	0	0	0	0.0186741	0	0.00113196	0
Zeller	CCIS12370844ST-4-0	F		Europe	France	81	Cancer	38.71	obesity	0	0	0	0	0	0	0	0	0	0	0	0	0	0	0	0	0	0	0	0	0	0	0	0	0	0	0	0	0	0	0	0	0	0	0	0	0	0	0	0
Zeller	CCIS12656533ST-4-0	M		Europe	France	51	Cancer	30	overweight	0	0	0	0	0	0.000320427	0	0.000788931	0.000546183	0.000242748	0	0	0.000307077	0.000283247	0.00156919	0.000364122	0	0.000182061	0	0.000303435	0	0	0	0	0	0.00103168	0	0.000546183	0.000443482	0.000266892	0.000191745	0	0.000849618	0.000201076	0	0.000869847	0.000948234	0.00013071	0.000178736	0.000182061
Zeller	CCIS13047523ST-4-0	M		Europe	France	70	Normal	22	normal	0	0	0	0	0	0	0	0	0	0	0	0	0	0	0	0	0	0	0	0	0	0	0	0	0	0	0	0	0	0	0	0	0	0	0	0	0.0366234	0	0	0
Zeller	CCIS14449628ST-4-0	F		Europe	France	59	Cancer	20	normal	0	0	0	0	0	0	0	0	0	0	0	0	0.00016975	0	0	0	0	0	0	0	0	0	0	0	0	0	0	0	0	0	0	0	0	0	0	0	0	0	0.00438038	0
Zeller	CCIS15704761ST-4-0	F		Europe	France	56	Cancer			0	0	0	0	0	0	0	0	0	0	0	0	0	0	0	0	0	0	0	0	0	0	0	0	0	0	0	0	0	0	0	0	0	0	0	0	0	0	0	0
Zeller	CCIS15794887ST-4-0	F		Europe	France	37	Normal	18	underweight	0	0	0	0	0	0	0	0	0	0	0	0	0.000623213	0	0	0	0	0	0	0	0	0	0	0	0	0	0	0	0	0	0	0	0	0	0	0	0	0	0	0
Zeller	CCIS16326685ST-4-0	F		Europe	France	46	Normal	29	overweight	0	0	0	0	0	0	0	0	0	0	0	0	0.000431334	0	0	0	0	0	0	0	0	0	0	0	0	0	0	0	0	0	0	0	0	0	0	0	0.0195069	0	0	0
Zeller	CCIS16383318ST-4-0	F		Europe	France	61	Normal	24	normal	0	0	0	0	0	0	0	0	0	0	0	0	3.82986e-05	0	0	0	0	0	0	0	0	0	0	0	0	0	0	0	0	0	0	0	0	0	0	0	0.0335648	0	0	0
Zeller	CCIS16561622ST-4-0	M		Europe	France	54	Normal	26	overweight	0	0	0	0	0	0	0	0	0	0	0	0	0.000262998	0	0	0	0	0	0	0	0	0	0	0	0	0	0	0	0	0.00113087	0	0	0	0.000993281	0	0	0.0102249	0	0.000216105	0
Zeller	CCIS17669415ST-4-0	F		Europe	France	72	Cancer	37	obesity	0	0	0	0	0	0	0	0	0	0	0	0	0.000166115	0	0	0	0	0	0	0	0	0	0	0	0	0	0	0	0	0	0	0	0	0	0	0	0.0143072	0	0	0
Zeller	CCIS19142497ST-3-0	M		Europe	France	68	Large adenoma	23	normal	0	0	0	0	0	0	0	0	0	0	0	0	0	0	0	0	0	0	0	0	0	0	0	0	0	0	0	0	0	0	0	0	0	0	0	0	0.0116342	0	0.00244618	0
Zeller	CCIS20795251ST-4-0	F		Europe	France	71	Normal	23	normal	0.00111424	0	0	0	0	0.000398506	0	0	0	0.000340827	0.000214507	0.000524349	0.000246865	0.0003001	0.000421352	0	0	0.000273099	0	0.0010487	0	0	0.000458806	0.00117979	0	0	0	0	0	0.000224117	0.000344453	0	0	0.000239453	0	0.000234865	0.000502502	0.00038822	0.00031021	0
Zeller	CCIS21126322ST-4-0	M		Europe	France	59	Normal	25	overweight	0	0	0	0	0	0	0	0	0.00333444	0	0	0	0.00043026	0.000157983	0	0	0	0.00105591	0	0	0	0	0	0	0	0	0	0	0	0.000372884	0.000140118	0	0	0.000266756	0	0	0	0	0.000260361	0
Zeller	CCIS21278152ST-4-0	M		Europe	France	63	Cancer	25	overweight	0	0	0	0	0	0.000361206	0	0	0	0.000722413	0	0	0.0003511	0.000251971	0.000438608	0	0	0	0	0	0	0.000722413	0	0	0	0	0	0	0.000416777	0.000271876	0.000183485	0	0	0.000309434	0	0.000255855	0.000842815	0.000166711	0.000138545	0.000722413
Zeller	CCIS22275061ST-4-0	M		Europe	France	62	Large adenoma	29	overweight	0	0	0	0	0	0	0	0	0	0	0.00462773	0	0.000137618	0.000346665	0.00606012	0	0	0	0	0	0	0	0	0	0	0	0	0	0	0	0	0	0	0	0	0	0.00313443	0	0.000333168	0
Zeller	CCIS22416007ST-4-0	M		Europe	France	82	Cancer	24.49	normal	0	0	0	0	0	0	0	0	0	0	0	0	0.000362829	0	0	0	0	0	0	0	0	0	0	0	0	0	0	0	0	0	0	0	0	0	0	0	0.0230263	0	0	0
Zeller	CCIS22906510ST-20-0	M		Europe	France	77	Small adenoma	23	normal	0	0	0	0	0	0	0	0	0	0	0	0	0.000463446	0	0	0	0	0	0	0	0	0	0	0	0	0	0	0	0	0	0	0	0	0	0	0	0.0125313	0	0	0
Zeller	CCIS22958137ST-20-0	M		Europe	France	60	Cancer	26	overweight	0	0	0	0	0	0	0	0	0	0	0	0	0.000298601	0.000185572	0	0	0	0	0	0	0	0	0	0	0	0	0	0	0	0.00109037	0	0	0	0.00104004	0	0	0.00975039	0	0	0
Zeller	CCIS23164343ST-4-0	M		Europe	France	62	Normal	23	normal	0	0	0	0	0	0	0	0	0	0	0	0	0	0	0	0	0	0	0	0	0	0	0	0	0	0	0	0	0	0	0	0	0	0	0	0	0.0114504	0	0	0
Zeller	CCIS24254057ST-4-0	F		Europe	France	69	Cancer	24	normal	0	0	0	0	0	0	0	0	0	0	0	0	0.000436471	4.12779e-05	0	0	0	0	0	0	0	0	0	0	0	0	0	0	0	0	0	0	0	0	0	0	0.0108463	0	0	0
Zeller	CCIS24898163ST-4-0	M		Europe	France	59	Small adenoma	31	obesity	0	0	0	0	0	0	0	0	0	0	0	0	0	0	0	0	0	0	0	0	0	0	0	0	0	0	0	0	0	0	0	0	0	0	0	0	0.0416667	0	0	0
Zeller	CCIS25399172ST-4-0	M		Europe	France	60	Small adenoma	27	overweight	0	0	0	0	0	0.000143659	0	0	0	0	0	0	0.000277934	0.000299378	0	0.000914196	0	0	0	0	0	0.00143659	0.0010448	0	0	0	0	0	0.000271245	0.000252773	0.000154913	0.00470158	0	0.000229855	0	0.000467981	0.000370032	0.000210968	0.000289823	0.000544164
Zeller	CCIS27304052ST-3-0	F		Europe	France	52	Normal	20	normal	0	0	0	0	0	0	0	0	0	0	0	0	0.000284613	5.46454e-05	0	0	0	0	0	0	0	0	0	0	0	0	0	0	0	0	0.000614623	0	0	0.000703757	0	0	0.00392297	0	0.000703496	0
Zeller	CCIS27927933ST-4-0	M		Europe	France	72	Normal	24	normal	0	0	0	0	0	0	0	0	0	0	0	0	0.000783723	0	0	0	0	0	0	0	0	0	0	0	0	0	0	0	0	0	0	0	0	0	0	0	0	0	0	0
Zeller	CCIS28384594ST-4-0	M		Europe	France	89	Large adenoma	24	normal	0	0	0	0	0	0	0	0	0	0	0	0	7.67191e-05	0	0	0	0	0	0	0	0	0	0	0	0	0	0	0	0	0	0	0	0	0.00019305	0	0	0.00345882	0	0.000409901	0
Zeller	CCIS29210128ST-4-0	M		Europe	France	64	Normal	27	overweight	0	0	0	0	0	0	0	0	0	0	0	0	6.07949e-05	0	0	0	0	0	0	0	0	0	0	0	0	0	0	0	0	0	0	0	0	0	0	0	0.0285752	0	0	0
Zeller	CCIS29688262ST-20-0	M		Europe	France	50	Normal	25	overweight	0	0	0	0	0	0	0	0	0	0	0	0	0	0	0	0	0	0	0	0	0	0	0	0	0	0	0	0	0	0	0	0	0	0	0	0	0.0251938	0	0	0
Zeller	CCIS31434951ST-20-0	M		Europe	France	66	Small adenoma	24	normal	0	0	0	0	0	0.00132701	0	0	0	0	0	0	0.000115312	0.000229323	0	0	0	0	0	0	0	0	0	0	0	0	0	0	0	0.000764409	0	0	0	0	0	0	0.00562796	0	0.000973836	0
Zeller	CCIS32105356ST-4-0	M		Europe	France	53	Small adenoma	30	overweight	0	0	0	0	0	0.000327103	0	0	0	0	0	0.00101246	0.000258847	0.00027604	0	0	0	0	0	0	0	0	0	0	0	0	0	0	0	0.000145714	0.000330583	0	0	0.000395639	0	0	0.000934579	0.00046729	0.000275253	0
Zeller	CCIS32452666ST-4-0	M		Europe	France	68	Normal	26	overweight	0	0	0	0	0	0	0	0	0	0	0	0	0.000126723	0	0	0	0	0	0	0	0	0	0	0	0	0	0	0	0.00583791	0	0	0	0	0	0	0	0.0223214	0	0	0
Zeller	CCIS33816588ST-4-0	M		Europe	France	64	Cancer	21	normal	0.000865177	0	0	0	0.000342466	0.00041168	0	0.000324441	0	0.00102379	0	0.000534727	0.000267196	0.000258521	0.000231744	0.00026436	0	0	0	0.000660899	0	0	0.000372507	0	0	0.000612833	0	0.000306417	0.000144196	0.000279864	0.000282256	0	0.000540735	0.000309541	0	0.000841144	0.000506188	0.000346625	0.00022222	9.61307e-05
Zeller	CCIS34055159ST-4-0	M		Europe	France	80	Cancer	29.4	overweight	0	0	0	0	0	0	0	0	0	0	0	0	0	0	0	0	0	0	0	0	0	0	0	0	0	0	0	0	0	0	0	0	0	0	0	0	0	0	0	0
Zeller	CCIS34604008ST-4-0	F		Europe	France	63	Normal	27	overweight	0	0	0	0	0	0	0	0	0	0	0	0	0.000404804	0	0	0	0	0	0	0	0	0	0	0	0	0	0	0	0.00438596	0	0	0	0	0.000426901	0	0	0.00438596	0	0.000270368	0
Zeller	CCIS35092938ST-4-0	F		Europe	France	62	Small adenoma	21	normal	0	0	0	0	0	0	0	0	0	0	0	0	0.000148965	0	0	0	0	0	0	0	0	0	0	0	0	0	0	0	0	0	0	0	0	0	0	0	0.0133625	0	0.00147769	0
Zeller	CCIS35100175ST-4-0	M		Europe	France	73	Cancer	40	obesity	0	0	0	0	0	0	0	0	0	0	0	0	0.000248139	0	0	0	0	0	0	0	0	0	0	0	0	0	0	0	0	0.000574065	0.000163834	0	0	0.000465435	0	0	0.00427789	0	0	0
Zeller	CCIS36699628ST-4-0	F		Europe	France	68	Normal	25	overweight	0	0	0	0	0	0	0	0	0	0	0	0	0.000138638	0	0	0	0	0	0	0	0	0	0	0	0	0	0	0	0	0	0	0	0	0	0	0	0	0	0	0
Zeller	CCIS36797902ST-4-0	M		Europe	France	63	Normal	25	overweight	0.000777998	0	0	0	0	0.000322091	0	0.000388999	0.0014004	0.000272299	6.71908e-05	0.000460316	0.000281354	0.000233556	0.000244514	0.000337133	0.000350099	0.000291749	0	0.000557565	0	0.00016338	0.000479766	0	0	0.0014393	0	0.000719648	0.000266315	0.000344243	0.000256574	0	0.000739098	0.000264001	0	0.000145875	0.00044897	0.00018253	0.000311999	0.000259333
Zeller	CCIS37250421ST-4-0	F		Europe	France	59	Small adenoma	21	normal	0	0	0	0	0	0	0	0	0	0	0	0	6.75858e-05	0	0	0	0	0	0	0	0	0	0	0	0	0	0	0	0	0	0	0	0	0	0	0	0.0228851	0	0	0
Zeller	CCIS38765456ST-20-0	F		Europe	France	79	Cancer	22	normal	0	0	0	0	0	0.000256041	0	0.000396963	0	0.000188558	0.000153372	0	0.000264803	0.000277914	0.000241013	0.000413503	0.000843547	0	0	0.000264642	0	0	0	0	0	0.000843547	0	0.000483799	0.000534374	0.00025077	0.000294027	0	0	0.000263981	0	0.000458989	0.000731901	0.000118326	0.000366715	0.000148861
Zeller	CCIS40244499ST-3-0	F		Europe	France	87	Cancer	32.42	obesity	0	0	0	0	0	0	0	0	0	0	0	0	2.52234e-05	0	0	0	0	0	0	0	0	0	0	0	0	0	0	0	0	0	0	0	0	0	0	0	0.0264155	0	0.00229403	0
Zeller	CCIS41222843ST-4-0	F		Europe	France	73	Cancer	24	normal	0	0	0	0	0	0	0	0.00799444	0	0.000903719	0	0	0.00017647	0.000257184	0	0	0	0	0	0	0	0	0	0	0	0	0	0	0.00141707	0.000407384	0.000447422	0	0	0.000145985	0	0.000782065	0.00460549	0	0.000240452	0
Zeller	CCIS41288781ST-4-0	F		Europe	France	74	Cancer	19	normal	0	0	0	0	0	0	0	0	0	0	0	0	0	0.000127654	0	0	0	0	0	0	0	0	0	0	0	0	0	0	0	0.00680819	0	0	0	0	0	0	0.00181374	0	0	0
Zeller	CCIS41548810ST-4-0	M		Europe	France	78	Cancer	19	normal	0	0	0	0	0	0	0	0	0	0	0	0	7.08799e-05	0	0	0	0	0	0	0	0	0	0	0	0	0	0	0	0	0	0	0	0	0	0	0	0.0315126	0	0	0
Zeller	CCIS41692898ST-4-0	F		Europe	France	67	Normal	28	overweight	0	0	0	0	0	0	0	0	0	0	0	0	0.000254832	0	0	0	0	0	0	0	0	0	0	0	0	0	0	0	0	0	0	0	0	0	0	0	0.0170765	0	0	0
Zeller	CCIS41806458ST-4-0	F		Europe	France	59	Small adenoma			0	0	0	0	0.000678952	0.000364694	0	0	0	0.00029098	0.000167534	0.000274814	0.000292553	0.000253825	0.000443398	0.000581959	0	0.000242483	0	0.000517297	0	0	0	0	0	0	0	0.000703201	0.000156681	0.000217974	0.000312132	0	0.0013579	0.000267055	0	0.0002344	0.000529421	0.000253675	0.000255105	0
Zeller	CCIS44093303ST-4-0	F		Europe	France	62	Normal	20	normal	0	0	0	0	0	0	0	0	0	0	0	0	0.000402996	0	0	0	0	0	0	0	0	0	0	0	0	0	0	0	0	0	0	0	0	0	0	0	0.0209627	0	0	0
Zeller	CCIS44676181ST-4-0	F		Europe	France	48	Small adenoma	21	normal	0	0	0	0	0	0	0	0	0	0	0	0	0.000181867	0	0	0	0	0	0	0	0	0	0	0	0	0	0	0	0	0	0	0	0	0	0	0	0	0	0	0
Zeller	CCIS44743950ST-4-0	M		Europe	France	66	Small adenoma	22	normal	0	0	0	0	0	0	0	0	0	0	0	0	7.40018e-05	0	0	0	0	0	0	0	0	0	0	0	0	0	0	0	0	0	0	0	0	0	0	0	0.0353303	0	0	0
Zeller	CCIS44757994ST-4-0	M		Europe	France	75	Cancer	37	obesity	0	0	0	0	0	8.46891e-05	0	0	0	0	0	0	0.000283147	0.000328009	0	0	0	0	0	0	0	0.00403388	0.00241438	0	0	0	0	0	0	0.000203695	0.000178411	0.00924894	0	0.000208751	0	0.000668598	0.000715029	0.000317156	0.000144252	0.000947181
Zeller	CCIS45571137ST-3-0	F		Europe	France	55	Normal	20	normal	0	0	0	0	0	0	0	0	0	0	0	0	0.00014746	0	0	0	0	0	0	0	0	0	0	0	0	0	0	0	0	0	0	0	0	0	0	0	0.0340909	0	0	0
Zeller	CCIS45793747ST-4-0	M		Europe	France	67	Normal	25	overweight	0	0	0	0	0.0172483	0	0	0	0	0	0	0	0.00034712	1.53656e-05	0	0	0	0.00367696	0	0	0	0	0	0	0	0	0	0	0.00290043	0	0	0	0	0.000221955	0	0	0.00250702	0	0.000739056	0
Zeller	CCIS46047672ST-4-0	M		Europe	France	65	Cancer	24	normal	0	0	0	0	0	0.000423509	0	0	0	0.000777874	0	0	0.000239909	0.000199957	0	0.00345722	0	0	0	0	0	0	0	0	0	0	0	0	0	0.000462356	0.000400545	0	0	0.000476808	0	0.00132347	0.00073826	0.00177016	0.000372213	0
Zeller	CCIS46467422ST-4-0	F		Europe	France	54	Cancer	22	normal	0	0	0	0	0	0	0	0	0	0	0	0	0	0	0	0	0	0	0	0	0	0	0	0	0	0	0	0	0	0	0	0	0	0	0	0	0.0416667	0	0	0
Zeller	CCIS47284573ST-4-0	M		Europe	France	67	Cancer	25	overweight	0	0	0	0	0	0	0	0	0	0.00316456	0	0	0.000209602	0.000121223	0	0	0	0	0	0	0	0	0	0	0	0	0	0	0	0	0.000286157	0	0	0	0	0	0.00483474	0	0.000260101	0
Zeller	CCIS47745468ST-4-0	M		Europe	France	63	Large adenoma	27	overweight	0	0	0	0	0	0	0	0	0	0	0	0	0.000118983	0	0	0	0	0	0	0	0	0	0	0	0	0	0	0	0	0	0	0	0	0	0	0	0.00898204	0	0.00274793	0
Zeller	CCIS48174381ST-4-0	M		Europe	France	66	Normal	25	overweight	0	0	0	0	0	0	0	0	0	0	0	0	6.21695e-05	0	0	0	0	0	0	0	0	0	0	0	0	0	0	0	0	0	0	0	0	0	0	0	0.0087108	0	0.00226719	0
Zeller	CCIS48507077ST-4-0	F		Europe	France	72	Small adenoma	32	obesity	0	0	0	0	0	0	0	0	0	0	0	0	4.00218e-05	0	0	0	0	0	0	0	0	0	0	0	0	0	0	0	0	0	0	0	0	0	0	0	0.0380987	0	0	0
Zeller	CCIS48579360ST-4-0	F		Europe	France	52	Small adenoma	23	normal	0	0	0	0	0	0	0	0	0	0	0	0	0	0	0	0	0	0	0	0	0	0	0	0	0	0	0	0	0	0	0	0	0	0	0	0	0	0	0	0
Zeller	CCIS48725289ST-4-0	F		Europe	France	62	Cancer	21	normal	0	0	0	0	0	0	0	0	0	0	0	0	0.000156974	0	0	0	0	0	0	0	0	0	0	0	0	0	0	0	0	0	0	0	0	0	0	0	0.0192012	0	0	0
Zeller	CCIS50003399ST-4-0	F		Europe	France	66	Normal	28	overweight	0	0	0	0	0	0	0	0	0	0	0	0	2.07956e-05	0	0	0	0	0	0	0	0	0	0	0	0	0	0	0	0	0	0	0	0	0	0	0	0.0219298	0	0	0
Zeller	CCIS50148151ST-4-0	F		Europe	France	87	Cancer	15.15	underweight	0	0	0	0	0	0	0	0	0	0	0	0	0.000116282	0	0	0	0	0	0	0	0	0	0	0	0	0	0	0	0	0	0	0	0	0	0	0	0.0287356	0	0	0
Zeller	CCIS50369211ST-20-0	F		Europe	France	53	Small adenoma	33	obesity	0	0	0	0	0	0	0	0	0	0	0	0	0	0	0	0	0	0	0	0	0	0	0	0	0	0	0	0	0	0	0	0	0	0	0	0	0	0	0	0
Zeller	CCIS50471204ST-4-0	F		Europe	France	61	Normal	23	normal	0	0.00312012	0	0	0	0.000120905	0.00182007	0	0	0	0	0	0.00026001	0.000247691	0.00047359	0	0	0	0	0	0	0	0	0	0	0	0	0	0	0.00018033	0.000207455	0	0	0.000330213	0	0.000633775	0.0019257	0	0.00051824	0.000520021
Zeller	CCIS50561855ST-4-0	F		Europe	France	60	Large adenoma	26	overweight	0	0	0	0	0	0	0	0	0	0	0	0	0.000244258	0.000176853	0	0	0	0	0	0	0	0	0	0	0	0	0	0	0	0	0	0	0	0	0	0	0.0109649	0	0.00200272	0
Zeller	CCIS51595129ST-4-0	F		Europe	France	63	Normal	22	normal	0	0	0	0	0	0.000351759	0	0	0	0	0	0	0.000221607	0.000182363	0	0.0031407	0	0	0	0	0	0	0	0	0	0	0	0	0.000579822	0.000216134	0.000387576	0	0	0.000376884	0	0	0.0031407	0	0.00101965	0
Zeller	CCIS51667829ST-4-0	M		Europe	France	63	Small adenoma	26	overweight	0	0	0	0	0	0.000666082	0	0	0	0	0	0	0.000218928	0.000346329	0	0	0	0	0	0	0	0	0	0	0	0	0	0	0	0	0.000685289	0	0	0.000239556	0	0	0.0024832	0.000809007	0.000498241	0.00219106
Zeller	CCIS52234160ST-4-0	M		Europe	France	64	Large adenoma	28	overweight	0	0	0	0	0	0.000462963	0	0	0	0.00154321	0	0	0.000255011	0.000202235	0	0	0	0	0	0	0	0	0	0	0	0	0	0	0	0.000315279	0.000334499	0	0	0.000583848	0	0.00115741	0.000803755	0	0.000103057	0
Zeller	CCIS52370277ST-4-0	M		Europe	France	53	Cancer	25	overweight	0	0	0	0	0	0	0	0	0	0	0	0	0.000160843	0	0	0	0	0	0	0	0	0	0	0	0	0	0	0	0	0	0	0	0	0	0	0	0.030112	0	0	0
Zeller	CCIS53043478ST-4-0	M		Europe	France	72	Cancer	22	normal	0	0	0.00670297	0	0	0.000310013	0	0	0	0.00150817	0.000723617	0.00139645	0.000270457	0.000141898	0	0	0	0	0	0	0	0	0	0	0	0	0	0.00188521	0	0.000238748	0.000242894	0	0	0.000360285	0	0	0.00296746	0	0.000215207	0
Zeller	CCIS53355328ST-4-0	M		Europe	France	76	Cancer			0	0	0	0	0	0.000705792	0	0	0	0.00107403	0	0	0.000352473	0.000191018	0	0	0	0	0	0	0	0	0	0	0	0	0	0	0.000619634	0.000259846	0.000171388	0	0.00498657	0.000414269	0	0	0.000974939	0	0.000433501	0.00140647
Zeller	CCIS53557295ST-4-0	M		Europe	France	45	Small adenoma	24	normal	0	0	0	0	0	0	0	0	0	0	0	0	0.000169627	0	0	0	0	0	0	0	0	0	0	0	0	0	0	0	0	0	0	0	0	0	0	0	0.0198802	0	0	0
Zeller	CCIS54027808ST-4-0	M		Europe	France	52	Small adenoma	33	obesity	0	0	0	0	0	0	0	0	0	0	0	0	0	0	0	0	0	0	0	0	0	0	0	0	0	0	0	0	0	0	0	0	0	0	0	0	0	0	0	0
Zeller	CCIS55230578ST-4-0	M		Europe	France	64	Cancer	30	overweight	0	0	0	0	0	0.000366848	0	0	0	0.000951087	0.000494071	0	0.000288709	0.000197915	0	0	0	0	0	0	0	0	0	0	0	0	0	0.00127378	0.000470318	0.000189925	0.000303538	0	0.00883152	0.000328351	0	0	0.0015993	0	0.000228	0.000849185
Zeller	CCIS55531770ST-4-0	F		Europe	France	45	Small adenoma	24	normal	0	0	0	0	0	0	0	0	0	0	0	0	0	0	0	0	0	0	0	0	0	0	0	0	0	0	0	0	0	0	0	0	0	0	0	0	0.0273224	0	0	0
Zeller	CCIS56503244ST-3-0	M		Europe	France	68	Large adenoma	21	normal	0	0	0	0	0	0	0	0	0	0	0	0	0.00019419	0	0	0	0	0	0	0	0	0	0	0	0	0	0	0	0	0	0	0	0	0	0	0	0.021518	0	0	0
Zeller	CCIS58234805ST-4-0	F		Europe	France	70	Cancer	26	overweight	0	0	0	0	0	0	0	0	0	0	0	0	0.000661944	0	0	0	0	0	0	0	0	0	0	0	0	0	0	0	0	0	0	0	0	0.000588235	0	0	0	0	0	0
Zeller	CCIS59132091ST-4-0	F		Europe	France	80	Cancer	23.19	normal	0	0.00216713	0	0	0	0.000204577	0.00101133	0	0	0	0.00017337	0	0.000278194	0.000249045	0.000321973	0	0	0	0	0	0	0	0	0	0	0	0	0	0	0.000247006	0.000256367	0	0	0.000295885	0	0.000151699	0.00017337	0.000200043	0.000361584	0.000462321
Zeller	CCIS59903910ST-4-0	F		Europe	France	76	Small adenoma	34	obesity	0	0	0	0	0	0	0	0	0	0	0	0	1.82374e-05	0	0	0	0	0	0	0	0	0	0	0	0	0	0	0	0	0	0	0	0	0	0	0	0.0330688	0	0	0
Zeller	CCIS61287323ST-4-0	M		Europe	France	76	Cancer	25	overweight	0	0	0	0	0	0	0	0	0	0	0	0	0.000191367	0.000166123	0	0	0	0	0	0	0	0	0	0	0	0	0	0	0	0	0	0	0	0	0	0	0.0249688	0	0	0
Zeller	CCIS62605362ST-3-0	F		Europe	France	56	Cancer	23	normal	0	0	0	0	0	8.45528e-05	0	0	0	0.00123577	0	0	0.000277728	0.000311435	0.000650407	0	0	0	0	0	0	0	0	0	0	0	0	0	0	0.000111898	0.000226604	0	0.0136585	9.9729e-05	0	0	0.00284553	0	0.000245016	0
Zeller	CCIS62794166ST-4-0	M		Europe	France	68	Cancer	23	normal	0	0	0	0	0	0	0	0	0	0	0	0	0.000275137	0	0	0	0	0	0	0	0	0	0	0	0	0	0	0	0	0	0	0	0	0	0.0153664	0	0.0231481	0	0.000113346	0
Zeller	CCIS63448910ST-4-0	F		Europe	France	61	Normal	34	obesity	0	0	0	0	0	0	0	0	0	0	0	0	2.65516e-05	0	0	0	0	0	0	0	0	0	0	0	0	0	0	0	0	0	0	0	0	0	0	0	0.0341022	0	0	0
Zeller	CCIS63468405ST-4-0	F		Europe	France	69	Normal	25	overweight	0	0	0	0	0	0	0	0	0	0	0	0	0.000534211	0	0	0	0	0	0	0	0	0	0	0	0	0	0	0	0	0	0	0	0	0	0	0	0.0123503	0	0	0
Zeller	CCIS63910149ST-4-0	F		Europe	France	49	Normal	23	normal	0	0	0	0	0	0	0	0	0	0	0	0	0.000207197	0	0	0	0	0	0	0	0	0	0	0	0	0	0	0	0	0	0	0	0	0	0	0	0.0206813	0	0	0
Zeller	CCIS64773582ST-4-0	F		Europe	France	63	Normal	23	normal	0	0	0	0	0	0.000100019	0	0	0	0	0.000145825	0.00025162	0.000241595	0.000274131	0.000552665	0.000880669	0	0	0	0.000345977	0	0.000773731	0	0	0	0	0	0	0.00033388	0.00016335	0.000187209	0	0	0.000191231	0	0.000259483	0.00175348	0.000116132	0.000376137	0
Zeller	CCIS64785924ST-20-0	F		Europe	France	59	Normal	25	overweight	0	0	0	0	0	0	0	0	0	0	0	0	0.00081103	0	0	0	0	0	0	0	0	0	0	0	0	0	0	0	0	0	0	0	0	0	0	0	0	0	0	0
Zeller	CCIS65479369ST-4-0	F		Europe	France	69	Cancer	25	overweight	0	0	0	0	0	0	0	0	0	0	0	0	0	0	0	0	0	0	0	0	0	0	0	0	0	0	0	0	0	0	0	0	0	0	0	0	0.0416667	0	0	0
Zeller	CCIS70398272ST-4-0	M		Europe	France	55	Small adenoma	24	normal	0	0	0	0	0	0	0	0	0	0	0.0100799	0	0.000147614	0	0	0	0	0	0	0	0	0	0	0	0	0	0	0	0	0	0.00064542	0	0	0	0	0	0.0148187	0	0	0
Zeller	CCIS71301801ST-4-0	F		Europe	France	50	Cancer	24	normal	0	0	0	0	0	0	0	0	0	0	0	0	0.000357572	0	0	0	0	0	0	0	0	0	0	0	0	0	0	0	0	0	0	0	0	0	0	0	0.0220649	0	0	0
Zeller	CCIS71578391ST-4-0	M		Europe	France	70	Normal	25	overweight	0	0	0	0	0	0	0	0	0	0	0	0	0.000119378	0	0	0	0	0	0	0	0	0	0	0	0	0	0	0	0	0.0001958	0.000621509	0	0	0	0	0	0.00821952	0	0.00176689	0
Zeller	CCIS72607085ST-4-0	F		Europe	France	74	Cancer	26	overweight	0	0	0	0	0	0	0	0	0	0	0	0	0.00072022	0	0	0	0	0	0	0	0	0	0	0	0	0	0	0	0	0	0	0	0	0	0	0	0	0	0	0
Zeller	CCIS74239020ST-4-0	M		Europe	France	62	Normal	24	normal	0	0	0	0	0	0	0	0	0	0	0	0	0.000243857	0	0	0	0	0	0	0	0	0	0	0	0	0	0	0	0	0	0	0	0	0	0	0	0.0119651	0	0	0
Zeller	CCIS74726977ST-3-0	M		Europe	France	66	Small adenoma	24	normal	0	0	0.00299037	0	0	0.000134567	0	0	0	0.000747594	0.000237871	0.000451671	0.000256095	0.00024342	0	0.000498396	0	0	0	0	0	0.0011027	0.000591845	0	0	0	0	0.000630782	0.00040255	0.000221063	0.00016801	0.00112139	0	0.000230508	0	0.000327072	0.000646357	0.000115014	0.000436523	0.000311497
Zeller	CCIS76563044ST-4-0	M		Europe	France	68	Small adenoma	36	obesity	0	0	0	0	0	0.00110115	0	0	0	0	0	0	0.00028142	0.000113585	0	0	0	0	0	0	0	0	0	0	0	0	0	0	0	0	0.00049718	0	0	0.000162185	0	0	0.00640205	0	0.000166629	0
Zeller	CCIS76845094ST-20-0	M		Europe	France	44	Cancer	20	normal	0	0	0	0	0	0	0	0	0	0	0	0	0.000397187	0	0	0	0	0	0	0	0	0	0	0	0	0	0	0	0	0	0	0	0	0	0	0	0.0151395	0	0	0
Zeller	CCIS77100899ST-4-0	M		Europe	France	73	Large adenoma	26	overweight	0	0	0	0	0	0	0	0	0	0	0	0	0.000123194	0	0	0	0	0	0	0	0	0	0	0	0	0	0	0	0	0	0	0	0	0	0	0	0.0114276	0	0.00346801	0
Zeller	CCIS77252613ST-4-0	M		Europe	France	65	Cancer	26	overweight	0	0	0	0	0	0	0	0	0	0	0	0	0.000266964	0	0	0	0	0	0	0	0	0	0	0	0	0	0	0	0	0	0	0	0	0	0	0	0.0131944	0	0	0
Zeller	CCIS78100604ST-4-0	F		Europe	France	64	Normal	30	overweight	0	0	0	0	0	0	0	0	0	0	0	0	0.000114754	0	0	0	0	0	0	0	0	0	0	0	0	0	0	0	0	0	0	0	0	0	0	0	0.0262906	0	0	0
Zeller	CCIS78318719ST-4-0	F		Europe	France	69	Cancer	30	overweight	0	0	0	0	0	0	0	0	0	0	0.00280199	0	0.000156466	0.000529349	0	0	0	0	0	0	0	0	0	0	0	0	0	0	0	0	0	0	0	0	0	0	0	0	0.00297116	0
Zeller	CCIS79210440ST-3-0	M		Europe	France	65	Normal	30	overweight	0	0	0	0	0	0	0.00272665	0	0	0	0	0	0.000267026	0.000158734	0	0	0	0	0	0	0	0	0	0	0	0	0	0	0	0.000285859	0.000122373	0	0	0.000211316	0	0	0.00138463	0.000865188	0.001033	0
Zeller	CCIS80834637ST-4-0	F		Europe	France	60	Normal	28	overweight	0	0	0	0	0	0	0	0	0	0	0	0	0.000156101	0.000325182	0	0	0	0	0	0	0	0	0	0	0	0	0	0	0	0.000508729	0	0	0	0	0	0	0.0224014	0	0	0
Zeller	CCIS81139242ST-4-0	F		Europe	France	64	Normal	20	normal	0	0	0	0	0	0	0	0	0	0	0	0	4.9995e-05	0.000635219	0	0	0	0	0	0	0	0	0	0	0	0	0	0	0	0	0	0	0	0	0	0	0.00656393	0	0	0
Zeller	CCIS81710917ST-20-0	M		Europe	France	49	Small adenoma	20	normal	0	0.00190579	0	0	0	0.000283703	0.00135716	0	0	0	0.000271694	0	0.000283733	0.000274857	0.000309382	0	0	0	0.000833785	0	0	0	0	0	0	0	0	0	0	0.000192815	0.000282114	0	0	0.000291067	0	0.000451182	0.0005342	0.000189913	0.000383888	0.00039704
Zeller	CCIS81735969ST-20-0	M		Europe	France	68	Large adenoma	26	overweight	0	0	0	0	0	0	0	0	0	0	0	0	0.00035438	0	0	0	0	0	0	0	0	0	0	0	0	0	0	0	0.00315813	0	0	0	0	0.000840665	0	0	0.0146628	0	0	0
Zeller	CCIS81887263ST-4-0	M		Europe	France	59	Cancer	27	overweight	0.00169827	0	0	0	0	0.000492499	0	0	0	0.000509482	0.000874868	0	0.000242988	0.000419718	0.000606526	0	0	0	0	0.0029248	0	0	0.00113218	0.00325502	0	0	0	0	0.000511659	0.000170436	0.000202498	0	0	0.000196245	0	0.000224078	0.00213464	0.000163296	0.00037901	0
Zeller	CCIS82146115ST-4-0	M		Europe	France	51	Cancer	24	normal	0	0	0	0	0	0	0	0	0	0	0	0	0	0	0	0	0	0	0	0	0	0	0	0	0	0	0	0	0	0	0	0	0	0	0	0	0.0416667	0	0	0
Zeller	CCIS82507866ST-3-0	M		Europe	France	57	Normal	24	normal	0	0	0	0	0	0	0	0	0	0	0	0	0.00020614	0.000300738	0	0.00228983	0	0	0	0	0	0	0	0	0	0	0	0	0.000566166	0.000147731	3.13198e-05	0	0	0.000124305	0	0.000572457	0.00568368	0	0.000571336	0
Zeller	CCIS82944710ST-20-0	F		Europe	France	38	Normal	22	normal	0	0	0	0	0	0	0	0	0	0	0	0	0	0	0	0	0	0	0	0	0	0	0	0	0	0	0	0	0	0	0	0	0	0	0	0	0	0	0	0
Zeller	CCIS83445808ST-4-0	M		Europe	France	66	Small adenoma	29	overweight	0	0	0	0	0	0	0	0	0	0	0	0	8.51767e-05	0	0	0	0	0	0	0	0	0	0	0	0	0	0	0	0	0	0	0	0	0	0	0	0.0163623	0	0.00293989	0
Zeller	CCIS83574003ST-4-0	M		Europe	France	60	Large adenoma	24	normal	0	0	0	0	0	0	0	0	0	0	0	0	0.000451462	0	0	0	0	0	0	0	0	0	0	0	0	0	0	0	0	0	0	0	0	0	0	0	0.0179747	0	0	0
Zeller	CCIS83870198ST-4-0	F		Europe	France	48	Cancer	24	normal	0	0	0	0	0	0	0	0	0	0	0	0	0.000171238	0.000140334	0	0	0	0	0	0	0	0	0	0	0	0	0	0	0	0	0	0	0	0	0	0	0.0193349	0	0	0
Zeller	CCIS84543192ST-4-0	F		Europe	France	45	Cancer	28	overweight	0	0	0	0	0	0	0	0	0	0	0	0	0.000517179	0	0	0	0	0	0	0	0	0	0	0	0	0	0	0	0	0	0	0	0	0	0	0	0.0150966	0	0	0
Zeller	CCIS85214191ST-3-0	M		Europe	France	63	Cancer	22	normal	0	0	0	0	0	0	0	0	0	0	0	0	0.000415825	0	0	0	0	0	0	0	0	0	0	0	0	0	0	0	0	0	0	0	0	0	0	0	0.0203037	0	0	0
Zeller	CCIS87116798ST-4-0	F		Europe	France	85	Cancer	20.31	normal	0.00146992	0	0	0	0	0.000153777	0	0	0	0.000452284	0	0.000320368	0.000238797	0.000301143	0.000274601	0.00113071	0	0	0	0.000678426	0	0	0.000904568	0	0	0	0	0	0.000295724	0.000193315	0.000286286	0	0	0.000208051	0	0.000395749	0.000932836	0.000139164	0.00029352	0
Zeller	CCIS87167916ST-4-0	M		Europe	France	79	Cancer	30	overweight	0	0	0	0	0	0	0	0	0	0	0	0	0	0	0	0	0	0	0	0	0	0	0	0	0	0	0	0	0	0	0	0	0	0	0	0	0	0	0	0
Zeller	CCIS87252800ST-4-0	M		Europe	France	73	Cancer	17	underweight	0	0	0	0	0	0	0	0	0	0	0	0	0.000473101	0	0	0	0	0	0	0	0	0	0	0	0	0	0	0	0	0	0	0	0	0	0	0	0.0173611	0	0	0
Zeller	CCIS87290971ST-4-0	M		Europe	France	71	Large adenoma	29	overweight	0	0	0	0	0	0	0	0	0	0	0	0	3.35463e-05	0	0	0	0	0	0	0	0	0	0	0	0	0	0	0	0	0	0	0	0	0	0	0	0.0314274	0	0.00063327	0
Zeller	CCIS87605453ST-4-0	F		Europe	France	73	Cancer	26	overweight	0	0	0	0	0	0	0	0	0	0	0	0	0.000479997	0	0	0	0	0	0	0	0	0	0	0	0	0	0	0	0	0	0	0	0	0	0	0	0.0170068	0	0	0
Zeller	CCIS88007743ST-4-0	F		Europe	France	67	Normal	23	normal	0	0	0	0	0	0	0	0	0	0	0	0	6.61222e-05	0	0	0	0	0	0	0	0	0	0	0	0	0	0	0	0	0	0	0	0	0	0	0	0.037155	0	0	0
Zeller	CCIS88317640ST-4-0	M		Europe	France	74	Normal	27	overweight	0	0	0	0	0	0.000161812	0	0	0	0	0	0	0.00032065	0.000180516	0	0	0	0	0	0	0	0	0	0	0	0	0	0	0	0.000191391	0.000106153	0	0	0.000280475	0	0	0.00191028	0	0.000240132	0
Zeller	CCIS90164298ST-4-0	M		Europe	France	84	Normal	23	normal	0	0	0	0	0	0.000480612	0	0	0	0.00158383	0.000670275	0	0.000263109	0.000212514	0	0	0	0	0	0	0	0	0	0	0	0	0	0	0	0.000231967	0.000321008	0	0	0.000476971	0	0.00106954	0.0003641	0.000483132	0.000190778	0
Zeller	CCIS90166425ST-4-0	F		Europe	France	78	Large adenoma	23	normal	0	0	0	0	0	0	0	0	0	0	0	0	0.000429155	0.000379719	0	0	0	0	0	0	0	0	0	0	0	0	0	0	0	0	0	0	0	0	0	0	0.0069133	0	0	0
Zeller	CCIS90443472ST-4-0	M		Europe	France	63	Large adenoma	30	overweight	0	0	0.0071599	0	0	0.000304296	0	0	0	0.00137232	0.000705142	0.00119332	0.000235905	0.000166607	0	0	0	0	0	0	0	0	0	0	0	0	0	0.00156623	0	0.000247004	0.000293569	0	0	0.000407717	0	0	0.00174025	0	0.000339196	0
Zeller	CCIS90903952ST-3-0	F		Europe	France	71	Large adenoma	22	normal	0	0	0	0	0	0	0	0	0	0	0	0	0.000158189	0	0	0	0	0	0	0	0	0	0	0	0	0	0	0	0	0	0	0	0	0	0	0	0.0335397	0	0	0
Zeller	CCIS91228662ST-4-0	M		Europe	France	63	Cancer	31	obesity	0	0	0	0	0	0	0	0	0	0	0	0	6.50683e-05	0	0	0	0	0	0	0	0	0	0	0	0	0	0	0	0	0	0	0	0	0	0	0	0.0370105	0	0	0
Zeller	CCIS93040568ST-20-0	M		Europe	France	65	Normal	30	overweight	0	0	0	0	0	0	0	0	0	0	0	0	0.000559678	0	0	0	0	0	0	0	0	0	0	0	0	0	0	0	0	0	0	0	0	0	0	0	0	0	0	0
Zeller	CCIS94417875ST-3-0	F		Europe	France	59	Normal	25	overweight	0	0	0	0	0	0.000163399	0	0	0	0.000594177	0	0	0.000317087	0.000279718	0.000318309	0.00113884	0	0	0	0	0	0	0.000693207	0	0	0	0	0	0.000239956	0.000132572	0.000146174	0	0	0.000127748	0	0.000903644	0.000513716	0	0.000330664	0
Zeller	CCIS94496512ST-4-0	M		Europe	France	64	Small adenoma	28	overweight	0	0	0	0	0	0	0	0	0	0	0	0	0	0	0	0	0	0	0	0	0	0	0	0	0	0	0	0	0	0	0	0	0	0	0	0	0.0215517	0	0	0
Zeller	CCIS94603952ST-4-0	F		Europe	France	80	Normal	21	normal	0	0	0	0	0	0	0	0	0	0	0	0	9.7624e-05	0	0	0	0	0	0	0	0	0	0	0	0	0	0	0	0	0	0	0	0	0	0	0	0.025463	0	0	0
Zeller	CCIS95097901ST-4-0	M		Europe	France	52	Normal	24	normal	0	0	0	0	0	0	0	0	0	0	0	0	6.09224e-05	0	0	0	0	0	0	0	0	0	0	0	0	0	0	0	0	0	0	0	0	0	0	0	0.0332551	0	0	0
Zeller	CCIS95409808ST-4-0	F		Europe	France	63	Normal	21	normal	0.00192264	0	0	0	0	0.00046822	0	0	0	0.00067858	0	0.000867074	0.000232889	0.000324925	0.00033929	0	0	0	0	0.00192264	0	0	0.000716278	0	0	0	0	0.000537209	0.000147896	0.000459683	0.000288156	0	0	0.000287265	0	0.000188494	0.000414687	0.000313191	0.00032767	0
Zeller	CCIS96387239ST-4-0	M		Europe	France	66	Small adenoma	20	normal	0	0	0	0	0	0	0	0	0	0	0	0	0.00018887	0	0	0	0	0	0	0	0	0	0	0	0	0	0	0	0	0	0	0	0	0	0	0	0.0319635	0	0	0
Zeller	CCIS98482370ST-3-0	F		Europe	France	53	Normal	30	overweight	0	0	0	0	0	0	0	0	0	0	0	0	2.51873e-05	0	0	0	0	0	0	0	0	0	0	0	0	0	0	0	0	0	0	0	0	0	0	0	0.0163906	0	0	0
Zeller	CCIS98512455ST-4-0	M		Europe	France	63	Cancer	29	overweight	0	0	0	0	0	0	0	0	0	0	0	0	0.000512464	0	0	0	0	0	0	0	0	0	0	0	0	0	0	0	0	0	0	0	0	0	0	0	0.0107601	0	0	0
Zeller	CCIS98832363ST-4-0	F		Europe	France	55	Cancer	25	overweight	0	0	0	0	0	0.000377321	0.00193246	0	0.00176869	0.00110052	0.000544901	0	0.000271911	0.000219502	0.000856273	0	0	0.000524058	0	0	0	0	0	0	0	0	0	0	0	0.000388817	0.00029635	0	0	0.00032033	0	0	0.000753333	0.000340133	0.000160179	0
Zeller	CCMD11006829ST-21-0	F		Europe	Germany	42	Cancer	34.8	obesity	0	0	0	0	0	0	0	0	0	0	0	0	7.53797e-05	0	0	0	0	0	0	0	0	0	0	0	0	0	0	0	0	0	0	0	0	0	0	0	0.0164945	0	0.00318299	0
Zeller	CCMD12232071ST-21-0	M		Europe	Germany	75	Cancer	27.8	overweight	0	0	0	0	0	0	0	0	0	0	0	0	0.000314901	0.000543173	0	0	0	0	0	0	0	0	0	0	0	0	0	0	0	0	0	0	0	0	0	0	0	0	0	0
Zeller	CCMD13071240ST-21-0	F		Europe	Germany	66	Cancer	23	normal	0	0	0	0	0	0	0	0	0	0	0	0	0.000455579	0	0	0	0	0	0	0	0	0	0	0	0	0	0	0	0	0	0	0	0	0	0	0	0.0115741	0	0	0
Zeller	CCMD13934959ST-21-0	M		Europe	Germany	56	Cancer	26.8	overweight	0	0	0	0	0	0	0	0	0	0	0	0	0.000207638	0	0	0	0	0	0	0	0	0	0	0	0	0	0	0	0	0	0	0	0	0	0	0	0.0237053	0	0	0
Zeller	CCMD14479708ST-21-0	M		Europe	Germany	74	Cancer	25.5	overweight	0	0	0	0	0	0	0	0	0	0	0	0	0.000511162	0	0	0	0	0	0	0	0	0	0	0	0	0	0	0	0	0	0	0	0	0	0	0	0.0115132	0	0	0
Zeller	CCMD18872694ST-21-0	M		Europe	Germany	63	Cancer	25.3	overweight	0	0	0	0	0	0	0	0	0	0	0	0	0.000109352	0	0	0	0	0	0	0	0	0	0	0	0	0	0	0	0	0	0	0	0	0	0	0	0.0339419	0	0	0
Zeller	CCMD19497912ST-21-0	F		Europe	Germany	53	Cancer	32	obesity	0	0	0	0	0	0	0	0	0	0	0	0	0.0002923	0.000525353	0	0	0	0	0	0	0	0	0	0	0	0	0	0	0	0	0	0	0	0.00034969	0	0	0.00846024	0	0	0
Zeller	CCMD23101338ST-21-0	M		Europe	Germany	69	Cancer	27.8	overweight	0	0	0	0	0	0	0	0	0	0	0	0	0.000205425	0	0	0	0	0	0	0	0	0	0	0	0	0	0	0	0	0	0	0	0	0	0	0	0.0205592	0	0	0
Zeller	CCMD25511638ST-21-0	F		Europe	Germany	72	Cancer	24.3	normal	0	0	0	0	0	0	0	0	0	0	0	0	0.000323819	0.000298549	0	0	0	0	0	0	0	0	0.00329068	0	0	0	0	0	0.00092814	0.000216233	0.00019254	0	0	0.000146252	0	0	0.00182815	0.000759387	0.000225389	0
Zeller	CCMD25963797ST-21-0	M		Europe	Germany	62	Cancer	21.7	normal	0	0	0	0	0	0	0	0	0	0	0	0	0.000367378	6.78421e-05	0	0	0	0	0	0	0	0	0	0	0	0	0	0	0	0.000185551	0.000188167	0	0	0	0	0	0.00575209	0	0.000715071	0
Zeller	CCMD26709089ST-21-0	M		Europe	Germany	66	Cancer	25.5	overweight	0	0	0	0	0	0	0	0	0	0	0	0	8.8691e-05	0	0	0	0	0	0	0	0	0	0	0	0	0	0	0	0	0	0	0	0	0	0	0	0.0334143	0	0	0
Zeller	CCMD26925580ST-21-0	M		Europe	Germany	42	Cancer	27.4	overweight	0	0	0	0	0	0	0	0	0	0	0	0	0.000261252	0	0	0	0	0	0	0	0	0	0	0	0	0	0	0	0	0	0	0	0	0	0	0	0.0125369	0	0	0
Zeller	CCMD34381688ST-21-0	M		Europe	Germany	41	Cancer	21.9	normal	0	0	0	0	0	0	0	0	0	0	0	0	0.000387884	0	0	0	0	0	0	0	0	0	0	0	0	0	0	0	0	0	0	0	0	0	0	0	0.0217391	0	0	0
Zeller	CCMD35802077ST-21-0	M		Europe	Germany	71	Cancer	29.7	overweight	0	0	0	0	0	0	0	0	0	0	0	0	6.36392e-05	9.19767e-05	0	0	0	0	0	0	0	0	0	0	0	0	0	0	0	0	0	0	0	0	0	0	0.00988443	0	0	0
Zeller	CCMD40701343ST-21-0	M		Europe	Germany	65	Cancer	27.7	overweight	0	0	0	0	0	0	0	0	0	0	0	0	0.000104784	8.46566e-05	0	0	0	0	0	0	0	0	0	0	0	0	0	0	0	0	0	0	0	0	0	0	0.0322997	0	0	0
Zeller	CCMD42428553ST-21-0	M		Europe	Germany	87	Cancer	22	normal	0	0	0	0	0	0	0	0	0	0	0	0	0.000375243	0.000129006	0	0	0	0	0	0	0	0	0	0	0	0	0	0	0	0	0	0	0	0	0	0	0.00160651	0	0.000213514	0
Zeller	CCMD45988061ST-21-0	F		Europe	Germany	62	Cancer	26.6	overweight	0	0	0	0	0	0	0	0	0	0	0	0	0.000218928	0.000523616	0	0	0	0	0	0	0	0	0	0	0	0	0	0	0	0	0	0	0	0	0	0	0.0195978	0	0	0
Zeller	CCMD46222674ST-21-0	M		Europe	Germany	59	Cancer	23.7	normal	0	0	0	0	0	0	0	0	0	0	0	0	0.000564077	0	0	0	0	0	0	0	0	0	0	0	0	0	0	0	0	0	0	0	0	0	0	0	0.00617027	0	0	0
Zeller	CCMD46947453ST-21-0	M		Europe	Germany	69	Cancer	24.3072	normal	0	0	0	0	0	0	0	0	0	0	0	0	0.000476911	0	0	0	0	0	0	0	0	0	0	0	0	0	0	0	0	0	0	0	0	0	0	0	0.00722752	0	0	0
Zeller	CCMD48236717ST-21-0	F		Europe	Germany	58	Cancer	32.4	obesity	0	0	0	0	0	0	0	0	0	0	0	0	9.76923e-05	0.00119135	0	0	0	0	0	0	0	0	0	0	0	0	0	0	0	0.000610948	0	0	0	0	0	0	0.00795455	0	0	0
Zeller	CCMD50071957ST-21-0	F		Europe	Germany	35	Cancer	22.3	normal	0	0	0	0	0	0	0	0	0	0	0	0	0.000254227	6.59119e-05	0	0	0	0	0	0	0	0	0	0	0	0	0	0	0	0	0	0	0	0	0	0	0.0144231	0	0.00171233	0
Zeller	CCMD51864103ST-21-0	M		Europe	Germany	58	Cancer	25.2	overweight	0	0	0	0	0	0	0	0	0	0	0	0	0.00015062	0	0	0	0	0	0	0	0	0	0	0	0	0	0	0	0	0	0	0	0	0	0	0	0.00892857	0	0	0
Zeller	CCMD60079086ST-21-0	F		Europe	Germany	73	Cancer	22.4	normal	0	0	0	0	0	0	0	0	0	0	0	0	0	0	0	0	0	0	0	0	0	0	0	0	0	0	0	0	0	0	0	0	0	0	0	0	0	0	0	0
Zeller	CCMD63399960ST-21-0	M		Europe	Germany	51	Cancer	27.7489	overweight	0	0	0	0	0	0.000590648	0	0	0	0	0	0	0.000166331	5.29255e-05	0	0	0	0	0	0	0	0	0	0	0	0	0	0	0	0	0.000322902	0	0	0.000164069	0	0	0.0160651	0	0.000752919	0
Zeller	CCMD64503764ST-21-0	M		Europe	Germany	66	Cancer	31.1	obesity	0	0	0	0	0	0	0	0	0	0	0	0	0.000366161	0	0	0	0	0	0	0	0	0	0	0	0	0	0	0	0	0	0	0	0	0	0	0	0.0228551	0	0	0
Zeller	CCMD64776337ST-21-0	F		Europe	Germany	79	Cancer	26.4	overweight	0	0	0	0	0	0	0	0	0	0	0	0	0.000462895	0	0	0	0	0	0	0	0	0	0	0	0	0	0	0	0	0	0	0	0	0	0	0	0.0118906	0	0	0
Zeller	CCMD72895164ST-21-0	M		Europe	Germany	34	Cancer	26.8	overweight	0	0	0	0	0	0	0	0	0	0	0	0	0.000236266	0	0	0	0	0	0	0	0	0	0	0	0	0	0	0	0	0	0	0	0	0	0	0	0.026455	0	0	0
Zeller	CCMD74930188ST-21-0	M		Europe	Germany	67	Cancer	30.1	obesity	0	0	0	0	0	0	0	0	0	0	0	0	1.36645e-05	0	0	0	0	0	0	0	0	0	0	0	0	0	0	0	0	0	0	0	0	0	0	0	0.0363396	0	0	0
Zeller	CCMD79987997ST-21-0	M		Europe	Germany	70	Cancer	25.2	overweight	0	0	0	0	0	0	0	0	0	0	0	0	0.000388388	0	0	0	0	0	0	0	0	0	0	0	0	0	0	0	0	0.000715177	0	0	0	0.000931161	0	0	0.0124709	0	0	0
Zeller	CCMD82866709ST-21-0	F		Europe	Germany	77	Cancer	26.2	overweight	0	0	0	0	0	0.0001	0	0	0	0	0	0	0.000298729	0.00031026	0	0	0	0	0	0	0	0.00405556	0.00166667	0	0	0	0	0	0	0.000218041	0.000135934	0.00694444	0	0.000203704	0	0.000555556	0.00162037	0.000512821	0.000135084	0.000925926
Zeller	CCMD86114146ST-21-0	M		Europe	Germany	68	Cancer	22.7	normal	0	0.00197376	0	0	0	0.000260072	0	0	0	0	0	0	0.000273733	0.000289323	0.000464414	0	0	0	0	0	0	0	0	0	0	0	0	0	0	0.000176028	0.000296435	0	0	0.000346763	0	0.000464414	0.000536979	0.000276862	0.000357058	0.00032896
Zeller	CCMD86707194ST-21-0	F		Europe	Germany	53	Cancer	30.5	obesity	0	0	0	0	0	0	0	0	0	0	0	0	1.59286e-05	3.29972e-05	0	0	0	0	0	0	0	0	0	0	0	0	0	0	0	0	0	0	0	0	0	0	0.0177305	0	0.000287724	0
Zeller	CCMD87156761ST-21-0	M		Europe	Germany	55	Cancer	27.5	overweight	0	0	0	0	0	0.00153846	0	0	0	0	0	0	0.000363472	0.000128115	0	0	0	0	0	0	0	0	0	0	0	0	0	0	0	0	0.000329111	0	0	0.000401338	0	0	0	0	0.00030925	0
Zeller	CCMD88272491ST-21-0	M		Europe	Germany	72	Cancer	27.7	overweight	0	0	0	0	0	0	0	0	0	0	0	0	7.85501e-05	3.09172e-05	0	0	0	0	0	0	0	0	0	0	0	0	0	0	0	0	0	0	0	0	0	0	0.0369922	0	0	0
Zeller	CCMD90311071ST-21-0	F		Europe	Germany	43	Cancer	22.1	normal	0	0	0	0	0	0	0	0	0	0	0	0	0.000191698	0	0	0	0	0	0	0	0	0	0	0	0	0	0	0	0	0	0.000437748	0	0	0.00014673	0	0	0.015949	0	0	0
Zeller	CCMD93344354ST-21-0	M		Europe	Germany	51	Cancer	29.7	overweight	0	0	0	0	0	0	0	0	0	0	0	0	0.000141857	0	0	0	0	0	0	0	0	0	0	0	0	0	0	0	0	0	0	0	0	0	0	0	0.028649	0	0.000570088	0
Zeller	CCMD95433940ST-21-0	F		Europe	Germany	49	Cancer	30.3	obesity	0	0	0	0	0	0	0	0	0	0	0	0	0.000240943	0	0	0	0	0	0	0	0	0	0	0	0	0	0	0	0	0	0	0	0	0	0	0	0.0232095	0	0	0
Zeller	CCMD96553385ST-21-0	M		Europe	Germany	90	Cancer	27.7	overweight	0	0	0	0	0	0	0	0	0	0	0	0	0.00052305	0	0	0	0	0	0	0	0	0	0	0	0	0	0	0	0	0	0	0	0	0	0	0	0.0136821	0	0	0
Zeller	MMPU29365221ST	M		Europe	Germany	34	Normal	23.3	normal	0	0	0	0	0	0	0	0	0	0	0	0	0.000140804	0.000101506	0	0	0	0	0	0	0	0	0	0	0	0	0	0	0	0	0	0	0	0	0	0	0.0289352	0	0	0
Zeller	MMPU68403337ST	M		Europe	Germany	30	Normal	31.2	obesity	0	0	0	0	0	0	0	0	0	0	0	0	0.000540687	9.75204e-05	0	0	0	0	0	0	0	0	0	0	0	0	0	0	0	0	0	0	0	0	0	0	0.0074483	0	0	0.00403084
Zeller	MMPU72854103ST	M		Europe	Germany	34	Normal	21.1	normal	0	0	0	0	0	0	0	0	0	0	0	0	6.92755e-05	0.000121808	0	0	0	0	0	0	0	0	0	0	0	0	0	0	0	0	0	0	0	0	0	0	0.0121528	0	0	0
Zeller	MMPU84450604ST	M		Europe	Germany	37	Normal	25	overweight	0	0	0	0	0	0	0	0	0	0	0	0	4.87891e-05	0.000149408	0	0	0	0	0	0	0	0	0	0	0	0	0	0	0	0	0	0	0	0	0	0	0.0170735	0	0.000220946	0
Zeller	MMPU99077057ST	M		Europe	Germany	49	Normal	26.3	overweight	0	0	0	0	0	0	0	0	0	0	0	0	8.83266e-05	0	0	0	0	0	0	0	0	0	0	0	0	0	0	0	0	0	0	0	0	0	0	0	0.0334178	0	0	0
Zhang	ERR589440			Asia	China					0	0	0	0	0	0	0	0	0	0	0	0	5.42276e-05	0	0	0	0	0	0	0	0	0	0	0	0	0	0	0	0	0	0	0	0	0	0	0	0.0306147	0	0	0
Zhang	ERR589441			Asia	China					0	0	0	0	0	0	0	0	0	0	0	0	5.9323e-06	0	0	0	0	0	0	0	0	0	0	0	0	0	0	0	0	0	0	0	0	0	0	0	0.0413619	0	0	0
Zhang	ERR589442			Asia	China					0	0	0	0	0	0	0	0	0	0	0	0	0	0	0	0	0	0	0	0	0	0	0	0	0	0	0	0	0	0	0	0	0	0	0	0	0.039185	0	0	0
Zhang	ERR589443			Asia	China					0	0	0	0	0	0	0	0	0	0	0	0	0.000207394	0.000117363	0	0	0	0	0	0	0	0	0	0	0	0	0	0	0	0	0	0	0	0	0	0	0.0285863	0	0	0
Zhang	ERR589448			Asia	China					0	0	0	0	0	0	0	0	0	0	0	0	4.91533e-05	0	0	0	0	0	0	0	0	0	0	0	0	0	0	0	0	0	0	0	0	0	0	0	0.00847763	0	0	0
Zhang	ERR589452			Asia	China					0	0	0	0	0	0	0	0	0	0	0	0	0	0	0	0	0	0	0	0	0	0	0	0	0	0	0	0	0	0	0	0	0	0	0	0	0	0	0	0
Zhang	ERR589485			Asia	China					0	0	0	0	0	0	0	0	0	0	0	0	5.3743e-05	0	0	0	0	0	0	0	0	0	0	0	0	0	0	0	0	0	0	0	0	0	0	0	0.0329891	0	0	0
Zhang	ERR589501			Asia	China					0	0	0	0	0	0	0	0	0	0	0	0	0.000334711	0	0	0	0	0	0	0	0	0	0	0	0	0	0	0	0	0	0	0	0	0	0	0	0.01924	0	0	0
Zhang	ERR589502			Asia	China					0	0	0	0	0	0	0	0	0	0	0	0	1.33353e-05	0	0	0	0	0	0	0	0	0	0	0	0	0	0	0	0	0	0	0	0	0	0	0	0.0404833	0	0	0
Zhang	ERR589503			Asia	China					0	0	0	0	0	0	0	0	0	0	0	0	0.000703599	0	0	0	0	0	0	0	0	0	0	0	0	0	0	0	0	0	0	0	0	0	0	0	0.00551928	0	0	0
Zhang	ERR589504			Asia	China					0	0	0	0	0	0	0	0	0	0	0	0	0.000260834	0	0	0	0	0	0	0	0	0	0	0	0	0	0	0	0	0	0	0	0	0	0	0	0.0219849	0	0	0
Zhang	ERR589505			Asia	China					0	0	0	0	0	0	0	0	0	0	0	0	0.000180066	0	0	0	0	0	0	0	0	0	0	0	0	0	0	0	0	0	0	0	0	0	0	0	0.0320948	0	0	0
Zhang	ERR589506			Asia	China					0	0	0	0	0	0	0	0	0	0	0	0	0.00081103	0	0	0	0	0	0	0	0	0	0	0	0	0	0	0	0	0	0	0	0	0	0	0	0	0	0	0
Zhang	ERR589507			Asia	China					0	0	0	0	0	0	0	0	0	0	0	0	7.62724e-05	0	0	0	0	0	0	0	0	0	0	0	0	0	0	0	0	0	0	0	0	0	0	0	0.0222048	0	0	0
Zhang	ERR589508			Asia	China					0	0	0	0	0	0	0	0	0	0	0	0	0.000251097	0	0	0	0	0	0	0	0	0	0	0	0	0	0	0	0	0	0	0	0	0	0	0	0.0227649	0	0	0
Zhang	ERR589509			Asia	China					0	0	0	0	0	0	0	0	0	0	0	0	3.31371e-05	0	0	0	0	0	0	0	0	0	0	0	0	0	0	0	0	0	0	0	0	0	0	0	0.0391556	0	0	0
Zhang	ERR589510			Asia	China					0	0	0	0	0	0	0	0	0.00839454	0	0	0	0.000268074	9.94313e-05	0	0	0	0.00262329	0	0	0	0	0	0	0	0	0	0	0	0.000473886	6.69777e-05	0	0	0.000209864	0	0	0.00170514	0	0.00208426	0
Zhang	ERR589511			Asia	China					0	0	0	0	0	0	0	0	0	0	0	0	0.000408708	0.000333376	0	0	0	0	0	0	0	0	0	0	0	0	0	0	0	0	0	0	0	0	0	0	0	0	0	0
Zhang	ERR589512			Asia	China					0	0	0	0	0	0	0	0	0	0	0	0	0.00081103	0	0	0	0	0	0	0	0	0	0	0	0	0	0	0	0	0	0	0	0	0	0	0	0	0	0	0
Zhang	ERR589513			Asia	China					0	0	0	0	0	0	0	0	0	0	0	0	0.000225026	0	0	0	0	0	0	0	0	0	0	0	0	0	0	0	0	0	0	0	0	0	0	0	0.0180636	0	0	0
Zhang	ERR589527			Asia	China					0	0	0	0	0	0	0	0	0	0	0	0	0.000388158	0	0	0	0	0	0	0	0	0	0	0	0	0	0	0	0	0	0	0	0	0	0	0	0.017834	0	0	0
Zhang	ERR589528			Asia	China					0	0	0	0	0	0	0	0	0	0	0.00170486	0	0.0001682	0	0	0	0	0	0	0	0	0	0	0	0	0	0	0	0	0	0	0	0	0	0	0	0.0252804	0	0	0
Zhang	ERR589529			Asia	China					0	0	0	0	0	0	0	0	0	0	0	0	0.000335881	0	0	0	0	0	0	0	0	0	0	0	0	0	0	0	0	0	0	0	0	0	0	0	0	0	0	0
Zhang	ERR589530			Asia	China					0	0	0	0	0	0	0	0	0	0	0	0	0.000535726	0	0	0	0	0	0	0	0	0	0	0	0	0	0	0	0	0	0	0	0	0	0	0	0.0066896	0	0	0
Zhang	ERR589531			Asia	China					0	0	0	0	0	0	0	0	0	0	0	0	0	0	0	0	0	0	0	0	0	0	0	0	0	0	0	0	0	0	0	0	0	0	0	0	0	0	0	0
Zhang	ERR589532			Asia	China					0	0	0	0	0	0	0	0	0	0	0	0	0	0	0	0	0	0	0	0	0	0	0	0	0	0	0	0	0	0	0	0	0	0	0	0	0	0	0	0
Zhang	ERR589533			Asia	China					0	0	0	0	0	0	0	0	0	0	0	0	3.17015e-05	0	0	0	0	0	0	0	0	0	0	0	0	0	0	0	0	0	0	0	0	0	0	0	0.040038	0	0	0
Zhang	ERR589534			Asia	China					0	0	0	0	0	0	0	0	0	0	0	0	0	0	0	0	0	0	0	0	0	0	0	0	0	0	0	0	0	0	0	0	0	0	0	0	0	0	0	0
Zhang	ERR589535			Asia	China					0	0	0	0	0	0	0	0	0	0	0	0	0.00061065	0	0	0	0	0	0	0	0	0	0	0	0	0	0	0	0	0	0	0	0	0	0	0	0.00872418	0	0	0
Zhang	ERR589536			Asia	China					0	0	0	0	0	0	0	0	0	0	0	0	3.4883e-05	0	0	0	0	0	0	0	0	0	0	0	0	0	0	0	0	0	0	0	0	0	0	0	0.0324821	0	0	0
Zhang	ERR589537			Asia	China					0	0	0	0	0	0	0	0	0	0	0	0	0.000208421	0	0	0	0	0	0	0	0	0	0	0	0	0	0	0	0	0	0	0	0	0	0	0	0.0221136	0	0	0
Zhang	ERR589538			Asia	China					0	0	0	0	0	0	0	0	0	0	0	0	6.64001e-05	0	0	0	0	0	0	0	0	0	0	0	0	0	0	0	0	0	0	0	0	0	0	0	0.0231481	0	0	0
Zhang	ERR589539			Asia	China					0	0	0	0	0	0	0	0	0	0	0	0	0.000403291	0	0	0	0	0	0	0	0	0	0	0	0	0	0	0	0	0	0	0	0	0	0	0	0.0182815	0	0	0
Zhang	ERR589540			Asia	China					0	0	0	0	0	0	0	0	0	0	0	0	0.000333508	0	0	0	0	0	0	0	0	0	0	0	0	0	0	0	0	0	0	0	0	0	0	0	0.00895639	0	0	0
Zhang	ERR589542			Asia	China					0	0	0	0	0	0	0	0	0	0	0	0	0.000475084	0	0	0	0	0	0	0	0	0	0	0	0	0	0	0	0	0	0	0	0	0	0	0	0.0155192	0	0	0
Zhang	ERR589543			Asia	China					0	0	0	0	0	0.000340757	0	0	0	0.000423163	0.000658028	0	0.000220369	0.000260211	0.000509068	0.00137342	0	0.00077951	0	0	0	0	0	0	0	0.00244989	0	0.000473274	0.00139627	0.000251455	0.000399232	0	0.00155902	0.000195249	0	0.000167038	0.000255197	0.000419736	0.000295939	0.000371195
Zhang	ERR589544			Asia	China					0	0	0	0	0	0	0	0	0	0	0	0	0	0	0	0	0	0	0	0	0	0	0	0	0	0	0	0	0	0	0	0	0	0	0	0	0.0160256	0	0	0
Zhang	ERR589545			Asia	China					0	0	0	0	0	0	0	0	0	0	0	0	6.45138e-05	0	0	0	0	0	0	0	0	0	0	0	0	0	0	0	0	0	0	0	0	0	0	0	0	0	0	0
Zhang	ERR589546			Asia	China					0	0	0	0	0	0	0	0	0	0	0	0	0.000605338	0	0	0	0	0	0	0	0	0	0	0	0	0	0	0	0	0	0	0	0	0	0	0	0.0101549	0	0	0
Zhang	ERR589547			Asia	China					0	0	0	0	0	0	0	0	0	0	0	0	0	0	0	0	0	0	0	0	0	0	0	0	0	0	0	0	0	0	0	0	0	0	0	0	0	0	0	0
Zhang	ERR589548			Asia	China					0	0	0	0	0	0	0	0	0	0	0	0	2.96997e-05	0	0	0	0	0	0	0	0	0	0	0	0	0	0	0	0	0	0	0	0	0	0	0	0.00569249	0	0.0050164	0
Zhang	ERR589549			Asia	China					0	0	0	0	0	0	0	0	0	0	0	0	0	0	0	0	0	0	0	0	0	0	0	0	0	0	0	0	0	0	0	0	0	0	0	0	0	0	0	0
Zhang	ERR589550			Asia	China					0	0	0	0	0	0	0	0	0	0	0	0	0.000601923	0	0	0	0	0	0	0	0	0	0	0	0	0	0	0	0	0	0	0	0	0	0	0	0.0101888	0	0	0
Zhang	ERR589551			Asia	China					0	0	0	0	0	0	0	0	0	0	0	0	0	0	0	0	0	0	0	0	0	0	0	0	0	0	0	0	0	0	0	0	0	0	0	0	0	0	0	0
Zhang	ERR589552			Asia	China					0	0	0	0	0	0	0	0	0	0	0	0	0.00031736	0	0	0	0	0	0	0	0	0	0	0	0	0	0	0	0	0	0	0	0	0	0	0	0	0	0	0
Zhang	ERR589553			Asia	China					0	0	0	0	0	0	0	0	0	0	0	0	0.000305606	0	0	0	0	0	0	0	0	0	0	0	0	0	0	0	0	0	0	0	0	0	0	0	0.0259662	0	0	0
Zhang	ERR589554			Asia	China					0	0	0	0	0	0	0	0	0	0	0	0	6.33871e-05	0	0	0	0	0	0	0	0	0	0	0	0	0	0	0	0	0	0	0	0	0	0	0	0.0346526	0	0	0
Zhang	ERR589555			Asia	China					0	0	0	0	0	0	0	0	0	0	0	0	0.000124444	0.000394692	0	0	0	0	0	0	0	0	0	0	0	0	0	0	0	0	0	0	0	0	0	0	0	0	0	0
Zhang	ERR589556			Asia	China					0	0	0	0	0	0	0	0	0	0	0	0	0.00021727	0	0	0	0	0	0	0	0	0	0	0	0	0	0	0	0	0	0	0	0	0	0	0	0.0247103	0	0	0
Zhang	ERR589557			Asia	China					0	0	0	0	0	0	0	0	0	0	0	0	6.21059e-05	0	0	0	0	0	0	0	0	0	0	0	0	0	0	0	0	0	0	0	0	0	0	0	0.0356607	0	0	0
Zhang	ERR589558			Asia	China					0	0	0	0	0	0	0	0	0	0	0	0	1.27654e-05	3.17334e-05	0	0	0	0	0	0	0	0	0	0	0	0	0	0	0	0	0	0	0	0	0	0	0.0257957	0	0	0
Zhang	ERR589559			Asia	China					0	0	0	0	0	0	0	0	0	0	0	0	0.000251397	0.000374967	0	0	0	0	0	0	0	0	0	0	0	0	0	0	0	0.00115932	0	0	0	0	0	0	0.00977089	0	0	0
Zhang	ERR589560			Asia	China					0	0	0	0	0	0	0	0	0	0	0	0	0.000227841	0	0	0	0	0	0	0	0	0	0	0	0	0	0	0	0	0	0	0	0	0	0	0	0.027921	0	0	0
Zhang	ERR589561			Asia	China					0	0	0	0	0	0	0	0	0	0	0	0	6.86759e-05	0.000197819	0	0	0	0	0	0	0	0	0	0	0	0	0	0	0	0	0.000264528	0	0	0.000143369	0	0	0.0263217	0	0	0
Zhang	ERR589562			Asia	China					0	0	0	0	0	0	0	0	0	0	0	0	1.51164e-05	0	0	0	0	0	0	0	0	0	0	0	0	0	0	0	0	0	0	0	0	0	0	0	0.0168828	0	0	0
Zhang	ERR589563			Asia	China					0	0	0	0	0	0	0	0	0	0	0	0	0.000164248	0	0	0	0	0	0	0	0	0	0	0	0	0	0	0	0	0	0	0	0	0	0	0	0.028419	0	0	0
Zhang	ERR589564			Asia	China					0	0	0	0	0	0	0	0	0	0	0	0	0.00011505	0	0	0	0	0	0	0	0	0	0	0	0	0	0	0	0	0	0	0	0	0	0	0	0.0240806	0	0	0
Zhang	ERR589565			Asia	China					0	0	0	0	0	0	0	0	0	0	0	0	0.000762527	0	0	0	0	0	0	0	0	0	0	0	0	0	0	0	0	0	0	0	0	0	0	0	0.00163399	0	0	0
Zhang	ERR589566			Asia	China					0	0	0	0	0	0	0	0	0	0	0	0	0.000190831	0	0	0	0	0	0	0	0	0	0	0	0	0	0	0	0	0	0	0	0	0	0	0	0.0273933	0	0	0
Zhang	ERR589567			Asia	China					0	0	0	0	0	0	0	0	0	0	0	0	0	0	0	0	0	0	0	0	0	0	0	0	0	0	0	0	0	0	0	0	0	0	0	0	0.0143208	0	0	0
Zhang	ERR589568			Asia	China					0	0	0	0	0	0	0	0	0	0	0	0	9.10556e-05	0	0	0	0	0	0	0	0	0	0	0	0	0	0	0	0	0	0	0	0	0	0	0	0.0369887	0	0	0
Zhang	ERR589569			Asia	China					0	0	0	0	0	0	0	0	0	0	0	0	0.000239499	0	0	0	0	0	0	0	0	0	0	0	0	0	0	0	0	0	0	0	0	0	0	0	0.0293624	0	0	0
Zhang	ERR589570			Asia	China					0	0	0	0	0	0	0	0	0	0	0	0	4.81323e-05	0	0	0	0	0	0	0	0	0	0	0	0	0	0	0	0	0	0	0	0	0	0	0	0.0284372	0	0	0
Zhang	ERR589571			Asia	China					0	0	0	0	0	0	0	0	0	0	0	0	4.36799e-05	0	0	0	0	0	0	0	0	0	0	0	0	0	0	0	0	0	0	0	0	0	0	0	0.0394226	0	0	0
Zhang	ERR589572			Asia	China					0	0	0	0	0	0	0	0	0	0	0	0	0.00053591	0	0	0	0	0	0	0	0	0	0	0	0	0	0	0	0	0	0	0	0	0	0	0	0.00588928	0	0	0
Zhang	ERR589573			Asia	China					0	0	0	0	0	0	0	0	0	0	0	0	0.00081103	0	0	0	0	0	0	0	0	0	0	0	0	0	0	0	0	0	0	0	0	0	0	0	0	0	0	0
Zhang	ERR589574			Asia	China					0	0	0	0	0	0	0	0	0	0	0	0	0.000716105	0	0	0	0	0	0	0	0	0	0	0	0	0	0	0	0	0	0	0	0	0	0	0	0.00316564	0	0	0
Zhang	ERR589575			Asia	China					0	0	0	0	0	0	0	0	0	0	0	0	0.000218354	0	0	0	0	0	0	0	0	0	0	0	0	0	0	0	0	0	0	0	0	0	0	0	0.025641	0	0	0
Zhang	ERR589576			Asia	China					0	0	0	0	0	0	0	0	0	0	0	0	7.2514e-05	0	0	0	0	0	0	0	0	0	0	0	0	0	0	0	0	0	0	0	0	0	0	0	0.036169	0	0	0
Zhang	ERR589577			Asia	China					0	0	0	0	0	0	0	0	0	0	0	0	0.00061105	0.000289991	0	0	0	0	0	0	0	0	0	0	0	0	0	0	0	0	0	0	0	0	0	0	0	0	0	0
Zhang	ERR589578			Asia	China					0	0	0	0	0	0	0	0	0	0	0	0	0	0	0	0	0	0	0	0	0	0	0	0	0	0	0	0	0	0	0	0	0	0	0	0	0.0228697	0	0	0
Zhang	ERR589579			Asia	China					0	0	0	0	0	0	0	0	0	0	0	0	0.000192306	0	0	0	0	0	0	0	0	0	0	0	0	0	0	0	0	0	0	0	0	0	0	0	0.027921	0	0	0
Zhang	ERR589580			Asia	China					0	0	0	0	0	0	0	0	0	0	0	0	0.000176722	0	0	0	0	0	0	0	0	0	0	0	0	0	0	0	0	0	0	0	0	0	0	0	0.0235084	0	0.00113267	0
Zhang	ERR589581			Asia	China					0	0	0	0	0	0	0	0	0	0	0	0	0.000104218	0	0	0	0	0	0	0	0	0	0	0	0	0	0	0	0	0	0.00219075	0	0	0	0	0	0.0178473	0	0	0
Zhang	ERR589582			Asia	China					0	0	0	0	0	0	0	0	0	0	0	0	7.10017e-05	0	0	0	0	0	0	0	0	0	0	0	0	0	0	0	0	0	0	0	0	0	0	0	0.0349729	0	0	0
Zhang	ERR589583			Asia	China					0	0	0	0	0	0	0	0	0	0	0	0	0.000160437	4.71058e-05	0	0	0	0	0	0	0	0	0	0	0	0	0	0	0	0	0.000132564	0	0	0	0	0	0.00330997	0	0.000928178	0
Zhang	ERR589584			Asia	China					0	0	0	0	0	0	0	0	0	0	0	0	0	0	0	0	0	0	0	0	0	0	0	0	0	0	0	0	0	0	0	0	0	0	0	0	0.0407545	0	0	0
Zhang	ERR589585			Asia	China					0	0	0	0	0	0	0	0	0	0	0	0	5.10128e-05	0	0	0	0	0	0	0	0	0	0	0	0	0	0	0	0	0	0	0	0	0	0	0	0.0262078	0	0	0
Zhang	ERR589586			Asia	China					0	0	0	0	0	0	0	0	0	0	0	0	6.69824e-05	0	0	0	0	0	0	0	0	0	0	0	0	0	0	0	0	0	0	0	0	0	0	0	0.0274368	0	0	0
Zhang	ERR589587			Asia	China					0	0	0	0	0	0	0	0	0	0	0	0	0.00018608	0	0	0	0	0	0	0	0	0	0	0	0	0	0	0	0	0	0	0	0	0	0	0	0.0222463	0	0	0
Zhang	ERR589588			Asia	China					0	0	0	0	0	0	0	0	0	0	0	0	0	0	0	0	0	0	0	0	0	0	0	0	0	0	0	0	0	0	0	0	0	0	0	0	0.0416667	0	0	0
Zhang	ERR589589			Asia	China					0	0	0	0	0	0	0	0	0	0	0	0	0	0	0	0	0	0	0	0	0	0	0	0	0	0	0	0	0	0	0	0	0	0	0	0	0.0359195	0	0	0
Zhang	ERR589590			Asia	China					0	0	0	0	0	0	0	0	0	0	0	0	0.000375843	0	0	0	0	0	0	0	0	0	0	0	0	0	0	0	0	0	0	0	0	0	0	0	0.0223577	0	0	0
Zhang	ERR589591			Asia	China					0	0	0	0	0	0	0	0	0	0	0	0	0.000154965	0	0	0	0	0	0	0	0	0	0	0	0	0	0	0	0	0.000460829	0	0	0	0	0	0	0.0193452	0	0	0
Zhang	ERR589592			Asia	China					0	0	0	0	0	0	0	0	0	0	0	0	0	0	0	0	0	0	0	0	0	0	0	0	0	0	0	0	0	0	0	0	0	0	0	0	0.0320893	0	0	0
Zhang	ERR589593			Asia	China					0	0	0	0	0	0	0	0	0	0	0	0	0	0	0	0	0	0	0	0	0	0	0	0	0	0	0	0	0	0	0	0	0	0	0	0	0.0313422	0	0	0
Zhang	ERR589594			Asia	China					0	0	0	0	0	0	0	0	0	0	0	0	5.08483e-05	0	0	0	0	0	0	0	0	0	0	0	0	0	0	0	0	0	0	0	0	0	0	0	0.0365726	0	0	0
Zhang	ERR589595			Asia	China					0	0	0	0	0	0	0	0	0	0	0	0	9.999e-05	0	0	0	0	0	0	0	0	0	0	0	0	0	0	0	0	0	0	0	0	0	0	0	0.0276826	0	0	0
Zhang	ERR589732			Asia	China					0	0	0	0	0	0	0	0	0	0	0	0	0	0	0	0	0	0	0	0	0	0	0	0	0	0	0	0	0	0	0	0	0	0	0	0	0.0152905	0	0	0
Zhang	ERR589733			Asia	China					0	0	0	0	0	0	0	0	0	0	0	0	5.60866e-05	0	0	0	0	0	0	0	0	0	0	0	0	0	0	0	0	0	0	0	0	0	0	0	0.0365898	0	0	0
Zhang	ERR589734			Asia	China					0	0	0	0	0	0	0	0	0	0	0	0	7.49321e-05	0	0	0	0	0.0048913	0	0	0	0	0	0	0	0	0	0	0	0	0	0	0	0	0	0	0.0194746	0	0	0
Zhang	ERR589735			Asia	China					0	0	0	0	0	0	0	0	0	0	0.0122727	0	6.08273e-05	0	0	0	0	0	0	0	0	0	0	0	0	0	0	0	0	0	0	0	0	0	0	0	0.00625	0	0.00376712	0
Zhang	ERR589736			Asia	China					0	0	0	0	0	0	0	0	0	0	0	0	5.94161e-05	0	0	0	0	0	0	0	0	0	0	0	0	0	0	0	0	0	0	0	0	0	0	0	0.0167888	0	0	0
Zhang	ERR589737			Asia	China					0	0	0	0	0	0	0	0	0	0	0	0	0.000398163	0	0	0	0	0	0	0	0	0	0	0	0	0	0	0	0	0	0	0	0	0	0	0	0.0197583	0	0	0
Zhang	ERR589738			Asia	China					0	0	0	0	0	0	0	0	0	0	0	0	0.000204594	0	0	0	0	0	0	0	0	0	0	0	0	0	0	0	0	0	0	0	0	0	0	0	0.00916343	0	0	0
Zhang	ERR589739			Asia	China					0	0	0	0	0	0	0	0	0	0	0	0	0.000180229	0	0	0	0	0	0	0	0	0	0	0	0	0	0	0	0	0	0	0	0	0	0	0	0.0324074	0	0	0
Zhang	ERR589740			Asia	China					0	0	0	0	0	0	0	0	0	0	0	0	0.000538663	4.31258e-05	0	0	0	0	0	0	0	0	0	0	0	0	0	0	0	0	0	0	0	0	0	0	0.00935829	0	0	0
Zhang	ERR589741			Asia	China					0	0	0	0	0	0	0	0	0	0	0	0	9.15116e-05	0	0	0	0	0	0	0	0	0	0	0	0	0	0	0	0	0	0	0	0	0	0	0	0.0254809	0	0.00188784	0
Zhang	ERR589742			Asia	China					0	0	0	0	0	0	0	0	0	0	0	0	6.28263e-05	0	0	0	0	0	0	0	0	0	0	0	0	0	0	0	0	0	0	0	0	0	0	0	0.037412	0	0	0
Zhang	ERR589743			Asia	China					0	0	0	0	0	0	0	0	0	0	0.00247612	0	0.000398678	9.67533e-05	0	0	0	0	0	0	0	0	0	0	0	0	0	0	0	0	0	0	0	0	0	0	0.0113489	0	0.00050637	0
Zhang	ERR589744			Asia	China					0	0	0	0	0	0	0	0	0	0	0	0	0.000160203	0	0	0	0	0	0	0	0	0	0	0	0	0	0	0	0	0	0	0	0	0	0	0	0.0308642	0	0	0
Zhang	ERR589745			Asia	China					0	0	0	0	0	0	0	0	0	0	0	0	0	0.00159019	0	0	0	0	0	0	0	0	0	0	0	0	0	0	0	0	0	0	0	0	0	0	0	0	0	0
Zhang	ERR589746			Asia	China					0	0	0	0	0	0	0	0	0	0	0	0	0	0	0	0	0	0	0	0	0	0	0	0	0	0	0	0	0	0	0	0	0	0	0	0	0.0222646	0	0	0
Zhang	ERR589747			Asia	China					0	0	0	0	0	0	0	0	0	0	0	0	0	0	0	0	0	0	0	0	0	0	0	0	0	0	0	0	0	0	0	0	0	0	0	0	0.03327	0	0	0
Zhang	ERR589748			Asia	China					0	0	0	0	0	0	0	0	0	0	0	0	0.000170384	0.000242839	0	0	0	0	0	0	0	0	0	0	0	0	0	0	0	0	0	0	0	0	0	0	0.0122549	0	0	0
Zhang	ERR589749			Asia	China					0	0	0	0	0	0	0	0	0	0	0	0	0.00081103	0	0	0	0	0	0	0	0	0	0	0	0	0	0	0	0	0	0	0	0	0	0	0	0	0	0	0
Zhang	ERR589750			Asia	China					0	0	0	0	0	0	0	0	0	0	0	0	0.000742092	0	0	0	0	0	0	0	0	0	0	0	0	0	0	0	0	0	0	0	0	0	0	0	0	0	0	0
Zhang	ERR589751			Asia	China					0	0	0	0	0	0	0	0	0	0	0	0	4.37485e-05	0	0	0	0	0	0	0	0	0	0	0	0	0	0	0	0	0	0	0	0	0	0	0	0.00656985	0	0	0
Zhang	ERR589752			Asia	China					0	0	0	0	0	0	0	0	0	0	0	0	0	0	0	0	0	0	0	0	0	0	0	0	0	0	0	0	0	0	0	0	0	0	0	0	0.0416667	0	0	0
Zhang	ERR589753			Asia	China					0	0	0	0	0	0	0	0	0	0	0	0	6.59141e-05	0	0	0	0	0	0	0	0	0	0	0	0	0	0	0	0	0	0	0	0	0	0	0	0.0119258	0	0	0
Zhang	ERR589754			Asia	China					0	0	0	0	0	0	0	0	0	0	0	0	2.37955e-05	0	0	0	0	0	0	0	0	0	0	0	0	0	0	0	0	0.000341772	0	0	0	0	0	0	0.00346373	0	0	0
Zhang	ERR589755			Asia	China					0	0	0	0	0	0	0	0	0	0	0	0	6.09724e-05	0	0	0	0	0	0	0	0	0	0	0	0	0	0	0	0	0	0	0	0	0	0	0	0.0208831	0	0	0
Zhang	ERR589756			Asia	China					0	0	0	0	0	0	0	0	0	0	0	0	0	0	0	0	0	0	0	0	0	0	0	0	0	0	0	0	0	0	0	0	0	0	0	0	0.00941265	0	0	0
Zhang	ERR589757			Asia	China					0	0	0	0	0	0	0	0	0	0	0	0	0	0.000406763	0	0	0	0	0	0	0	0	0	0	0	0	0	0	0	0	0	0	0	0	0	0	0.0137061	0	0	0
Zhang	ERR589758			Asia	China					0	0	0	0	0	0	0	0	0	0	0	0	0.000103465	0	0	0	0	0	0	0	0	0	0	0	0	0	0	0	0	0	0	0	0	0	0	0	0.0188615	0	0	0
Zhang	ERR589759			Asia	China					0	0	0	0	0	0	0	0	0	0	0	0	0.000302418	0	0	0	0	0	0	0	0	0	0	0	0	0	0	0	0	0	0	0	0	0	0	0	0.0240113	0	0	0
Zhang	ERR589760			Asia	China					0	0	0	0	0	0	0	0	0	0	0	0	4.24913e-05	0	0	0	0	0	0	0	0	0	0	0	0	0	0	0	0	0	0	0	0	0	0	0	0.0294229	0	0	0
Zhang	ERR589761			Asia	China					0	0	0	0	0	0	0	0	0	0	0	0	2.05696e-05	0	0	0	0	0	0	0	0	0	0	0	0	0	0	0	0	0	0	0	0	0	0	0	0.0362319	0	0	0
Zhang	ERR589762			Asia	China					0	0	0	0	0	0	0	0	0	0	0	0	0	0	0	0	0	0	0	0	0	0	0	0	0	0	0	0	0	0	0	0	0	0	0	0	0.0416667	0	0	0
Zhang	ERR589763			Asia	China					0	0	0	0	0	0	0	0	0	0	0	0	0.000280197	0.000108635	0	0	0	0	0	0	0	0	0	0	0	0	0	0	0	0	0	0	0	0	0	0	0.0191495	0	0	0
Zhang	ERR589764			Asia	China					0	0	0	0	0	0	0	0	0	0	0	0	0.000603699	0	0	0	0	0	0	0	0	0	0	0	0	0	0	0	0	0	0	0	0	0	0	0	0.0093985	0	0	0
Zhang	ERR589765			Asia	China					0	0	0	0	0	0	0	0	0	0	0	0	2.59391e-05	0	0	0	0	0	0	0	0	0	0	0	0	0	0	0	0	0	0	0	0	0	0	0	0	0	0	0
Zhang	ERR589766			Asia	China					0	0	0	0	0	0	0	0	0	0	0	0	0.000439881	0.000123018	0	0	0	0	0	0	0	0	0	0	0	0	0	0	0	0	0.000342589	0	0	0	0	0	0.00677966	0	0	0
Zhang	ERR589767			Asia	China					0	0	0	0	0	0	0	0	0	0	0	0	2.0634e-05	0	0	0	0	0	0	0	0	0	0	0	0	0	0	0	0	0	0	0	0	0	0	0	0.0212014	0	0	0
Zhang	ERR589768			Asia	China					0	0	0	0	0	0	0	0	0	0	0	0	0.00015988	0	0	0	0	0	0	0	0	0	0	0	0	0	0	0	0	0	0	0	0	0	0	0	0.020908	0	0.00112928	0
Zhang	ERR589769			Asia	China					0	0	0.00586588	0	0	0.000399947	0	0	0	0.00178643	0.00060598	0.00104431	0.000277552	0.000173095	0	0	0	0	0	0	0	0	0	0	0	0	0	0.00159979	0.000994739	0.00025373	0.000246066	0	0	0.000247967	0	0	0.00163867	0	0.000258413	0
Zhang	ERR589770			Asia	China					0	0	0	0	0	0	0	0	0	0	0	0	0.000198099	0	0	0	0	0	0	0	0	0	0	0	0	0	0	0	0	0	0	0	0	0	0	0	0.0277106	0	0	0
Zhang	ERR589771			Asia	China					0	0	0	0	0	0	0	0	0	0	0.00563587	0	0.000275444	0.000141292	0	0	0	0.0184187	0	0	0	0	0	0	0	0	0	0	0	0	0	0	0	0	0	0	0.0146002	0	0	0
Zhang	ERR589772			Asia	China					0	0	0	0	0	0	0	0	0	0	0	0	3.00836e-05	0	0	0	0	0	0	0	0	0	0	0	0	0	0	0	0	0	0	0	0	0	0	0	0.0378501	0	0	0
Zhang	ERR589773			Asia	China					0	0	0	0	0	0	0	0	0	0	0	0	3.37244e-05	0	0	0	0	0	0	0	0	0	0	0	0	0	0	0	0	0	0	0	0	0	0	0	0.0388776	0	0	0
Zhang	ERR589774			Asia	China					0	0	0	0	0	0	0	0	0	0	0	0	0.000291104	0.000370241	0	0	0	0	0	0	0	0	0	0	0	0	0	0	0	0	0	0	0	0	0	0	0.0118253	0	0	0
Zhang	ERR589775			Asia	China					0	0	0	0	0	0.000263397	0	0	0	0	0	0	0.000253033	0.000279255	0	0	0	0.000908265	0	0	0	0	0	0	0.00454133	0	0	0	0	0.000366236	0.000318859	0	0.00953678	0.000302755	0	0	0.00264911	0.000454133	0.000192851	0
Zhang	ERR589776			Asia	China					0	0	0	0	0	0	0	0	0	0	0	0	0.000128561	0	0	0	0	0	0	0	0	0	0	0	0	0	0	0	0	0	0	0	0	0	0	0	0.0302136	0	0	0
Zhang	ERR589777			Asia	China					0	0	0	0	0	0	0	0	0	0	0	0	5.30213e-05	0	0	0	0	0	0	0	0	0	0	0	0	0	0	0	0	0	0	0	0	0	0	0	0.025222	0	0	0
Zhang	ERR589778			Asia	China					0	0	0	0	0	0	0	0	0	0	0	0	0.000128855	0	0	0	0	0	0	0	0	0	0	0	0	0	0	0	0	0	0	0	0	0	0	0	0.027648	0	0	0
Zhang	ERR589779			Asia	China					0	0	0	0	0	0	0	0	0	0	0	0	0.00034735	0	0	0	0	0	0	0	0	0	0	0	0	0	0	0	0	0	0	0	0	0	0	0	0.0210438	0	0	0
Zhang	ERR589780			Asia	China					0	0	0	0	0	0	0	0	0	0	0	0	0.000185442	0	0	0	0	0	0	0	0	0	0	0	0	0	0	0	0	0	0	0	0	0	0	0	0.0248699	0	0	0
Zhang	ERR589781			Asia	China					0	0	0	0	0	0	0	0	0	0	0	0	0.000389918	0	0	0	0	0	0	0	0	0	0	0	0	0	0	0	0	0	0	0	0	0	0	0	0.0216346	0	0	0
Zhang	ERR589782			Asia	China					0	0	0	0	0	0	0	0	0	0	0	0	2.77572e-05	0	0	0	0	0	0	0	0	0	0	0	0	0	0	0	0	0	0	0	0	0	0	0	0.0311943	0	0	0
Zhang	ERR589783			Asia	China					0	0	0	0	0	0	0	0	0	0	0	0	1.9132e-05	0	0	0	0	0	0	0	0	0	0	0	0	0	0	0	0	0	0	0	0	0	0	0	0.0350427	0	0	0
Zhang	ERR589784			Asia	China					0	0	0	0	0	0	0	0	0	0	0	0	7.6008e-05	0	0	0	0	0	0	0	0	0	0	0	0	0	0	0	0	0	0	0	0	0	0	0	0.0210264	0	0	0
Zhang	ERR589785			Asia	China					0	0	0	0	0	0	0	0	0	0	0	0	0.000136979	0	0	0	0	0	0	0	0	0	0	0	0	0	0	0	0	0.00136206	0	0	0	0	0	0	0.0216983	0	0.000438626	0
Zhang	ERR589786			Asia	China					0	0	0	0	0	0	0	0	0	0	0	0	0.000111699	0	0	0	0	0	0	0	0	0	0	0	0	0	0	0	0	0	0	0	0	0	0	0	0.0274451	0	0	0
Zhang	ERR589787			Asia	China					0	0	0	0	0	0	0	0	0	0	0	0	0.000360458	0	0	0	0	0	0	0	0	0	0	0	0	0	0	0	0	0	0	0	0	0	0	0	0.0231481	0	0	0
Zhang	ERR589788			Asia	China					0	0	0	0	0	0	0	0	0	0	0	0	8.1103e-05	0.000229106	0	0	0	0	0	0	0	0	0	0	0	0	0	0	0	0	0	0	0	0	0	0	0.0227273	0	0	0
Zhang	ERR589789			Asia	China					0	0	0	0	0	0	0	0	0	0	0	0	6.04565e-05	0	0	0	0	0	0	0	0	0	0	0	0	0	0	0	0	0	0	0	0	0	0	0	0.0316456	0	0	0
Zhang	ERR589790			Asia	China					0	0	0	0	0	0.000361415	0	0	0	0	0.000323932	0.000636294	0.000247087	0.000252465	0.000472676	0	0	0.000593875	0	0.00118775	0	0	0	0	0.00407228	0	0	0	0	8.7576e-05	0.000335747	0	0	0.000193433	0	0	0.000137864	0.000332831	0.000216166	0
Zhang	ERR589791			Asia	China					0	0	0	0	0	0	0	0	0	0	0	0	0.00010862	0	0	0	0	0	0	0	0	0	0	0	0	0	0	0	0	0	0	0	0	0	0	0	0.0223214	0	0	0
Zhang	ERR589792			Asia	China					0	0	0	0	0	0	0	0	0	0	0	0	0.000445874	0.000248433	0	0	0	0	0	0	0	0	0	0	0	0	0	0	0	0	0	0	0	0	0	0	0	0	0	0
Zhang	ERR589793			Asia	China					0	0	0	0	0	0	0	0	0	0	0	0	0.000495231	0	0	0	0	0	0	0	0	0	0	0	0	0	0	0	0	0	0	0	0	0	0	0	0	0	0	0
Zhang	ERR589794			Asia	China					0	0	0	0	0	0	0	0	0	0	0	0	0.000736829	0	0	0	0	0	0	0	0	0	0	0	0	0	0	0	0	0	0	0	0	0	0	0	0	0	0	0
Zhang	ERR589795			Asia	China					0	0	0	0	0	0	0	0	0	0	0	0	0.000286033	0	0	0	0	0	0	0	0	0	0	0	0	0	0	0	0	0	0	0	0	0	0	0	0	0	0	0
Zhang	ERR589796			Asia	China					0	0	0	0	0	0	0	0	0	0	0	0	0	4.0907e-05	0	0	0	0	0	0	0	0	0	0	0	0	0	0	0	0	0	0	0	0	0	0	0.000785024	0	0	0
Zhang	ERR589797			Asia	China					0	0	0	0	0	0	0	0	0	0	0	0	0.000347584	0	0	0	0	0	0	0	0	0	0	0	0	0	0	0	0	0	0	0	0	0	0	0	0.00873744	0	0	0
Zhang	ERR589798			Asia	China					0	0	0	0	0	0	0	0	0	0	0	0	0.00081103	0	0	0	0	0	0	0	0	0	0	0	0	0	0	0	0	0	0	0	0	0	0	0	0	0	0	0
Zhang	ERR589799			Asia	China					0	0	0	0	0	0	0	0	0	0	0	0	0.000153604	0	0	0	0	0	0	0	0	0	0	0	0	0	0	0	0	0	0	0	0	0	0	0	0.0315657	0	0	0
Zhang	ERR589800			Asia	China					0	0	0	0	0	0	0	0	0	0	0.0057754	0	0	0	0	0	0	0	0	0	0	0	0	0	0	0	0	0	0	0.000936116	0	0	0	0	0	0	0.00980392	0	0.00354553	0
Zhang	ERR589801			Asia	China					0	0	0	0	0	0	0	0	0	0	0	0	7.82719e-05	0	0	0	0	0	0	0	0	0	0	0	0	0	0	0	0	0	0	0	0	0	0	0	0.0253822	0	0.000609453	0
Zhang	ERR589802			Asia	China					0	0	0	0	0	0	0	0	0	0	0	0	0	0.000975546	0	0	0	0	0	0	0	0	0	0	0	0	0	0	0	0	0	0	0	0	0	0	0	0	0	0
Zhang	ERR589803			Asia	China					0	0	0	0	0	0	0	0	0	0	0	0	0.000280794	0	0	0	0	0	0	0	0	0	0	0	0	0	0	0	0	0	0	0	0	0	0	0	0.0203081	0	0	0
Zhang	ERR589804			Asia	China					0	0	0	0	0	0	0	0	0	0	0	0	0.000269418	0	0	0	0	0	0	0	0	0	0	0	0	0	0	0	0	0.000552364	0	0	0	0	0	0	0.0256849	0	0	0
Zhang	ERR589805			Asia	China					0	0	0	0	0	0	0	0	0	0	0	0	0	0	0	0	0	0	0	0	0	0	0	0	0	0	0	0	0	0	0	0	0	0	0	0	0.0182292	0	0	0
Zhang	ERR589806			Asia	China					0	0	0	0	0	0	0	0	0	0	0	0	0.000294197	0	0	0	0	0	0	0	0	0	0	0	0	0	0	0	0	0	0	0	0	0	0	0	0	0	0	0
Zhang	ERR589807			Asia	China					0	0	0	0	0	0	0	0	0	0	0	0	3.57507e-05	0	0	0	0	0	0	0	0	0	0	0	0	0	0	0	0	0	0	0	0	0	0	0	0.0309614	0	0	0
Zhang	ERR589808			Asia	China					0	0	0	0	0	0	0	0	0	0	0	0	9.12735e-05	0	0	0	0	0	0	0	0	0	0	0	0	0	0	0	0	0	0	0	0	0	0	0	0.0068328	0	0.00110118	0
Zhang	ERR589809			Asia	China					0	0	0	0	0	0	0	0	0	0	0	0	2.89018e-05	2.21067e-05	0	0	0	0	0	0	0	0	0	0	0	0	0	0	0	0	0	0	0	0	0	0	0.0342654	0	0	0
Zhang	ERR589810			Asia	China					0	0	0	0	0	0	0	0	0	0	0	0	0.000729092	0	0	0	0	0	0	0	0	0	0	0	0	0	0	0	0	0	0	0	0	0	0	0	0.00339102	0	0	0
Zhang	ERR589811			Asia	China					0	0	0	0	0	0	0	0	0	0	0	0	0.00051611	0	0	0	0	0	0	0	0	0	0	0	0	0	0	0	0	0	0	0	0	0	0	0	0.0105219	0	0	0
Zhang	ERR589812			Asia	China					0	0	0	0	0	0	0	0	0	0	0	0	0	0	0	0	0	0	0	0	0	0	0	0	0	0	0	0	0	0	0	0	0	0	0	0	0	0	0	0
Zhang	ERR589813			Asia	China					0	0	0	0	0	0.000377049	0	0	0	0.00114754	0	0	0.000327404	0.00018674	0	0.00245902	0	0	0	0	0	0	0	0	0	0	0	0.00143443	0	0.000304072	0.000196198	0	0	0.000265027	0	0	0.00221995	0.00037831	0.000314395	0
Zhang	ERR589814			Asia	China					0	0	0	0	0	0	0	0	0	0	0	0	0.000168526	0	0	0	0	0	0	0	0	0	0	0	0	0	0	0	0	0	0	0	0	0	0	0	0.00775613	0	0	0
Zhang	ERR589815			Asia	China					0	0	0	0	0	0	0	0	0	0	0	0	0	0	0	0	0	0	0	0	0	0	0	0	0	0	0	0	0	0	0	0	0	0	0	0	0.0296053	0	0	0
Zhang	ERR589816			Asia	China					0	0	0	0	0	0	0	0	0	0	0	0	0	0	0	0	0	0	0	0	0	0	0	0	0	0	0	0	0	0	0	0	0	0	0	0	0.027039	0	0	0
Zhang	ERR589817			Asia	China					0	0	0	0	0	0	0	0	0	0	0	0	1.87922e-05	0	0	0	0	0	0	0	0	0	0	0	0	0	0	0	0	0	0	0	0	0	0	0	0.0304878	0	0.0011694	0
Zhang	ERR589818			Asia	China					0	0	0	0	0	0	0	0	0	0	0	0	0.000215491	0	0	0	0	0	0	0	0	0	0	0	0	0	0	0	0	0	0	0	0	0	0	0	0	0	0	0
Zhang	ERR589819			Asia	China					0	0	0	0	0	0	0	0	0	0	0	0	0.000174466	0	0	0	0	0	0	0	0	0	0	0	0	0	0	0	0	0	0	0	0	0	0	0	0.00282623	0	0	0
Zhang	ERR589820			Asia	China					0	0	0	0	0	0	0	0	0	0	0	0	0.000641772	0	0	0	0	0	0	0	0	0	0	0	0	0	0	0	0	0	0	0	0	0	0	0	0	0	0	0
Zhang	ERR589821			Asia	China					0	0	0	0	0	0	0	0	0	0	0	0	0.00049616	0	0	0	0	0	0	0	0	0	0	0	0	0	0	0	0	0	0	0	0	0	0	0	0.0142157	0	0	0
Zhang	ERR589822			Asia	China					0	0	0	0	0	0	0	0	0	0	0	0	0.00023546	0	0	0	0	0	0	0	0	0	0	0	0	0	0	0	0	0	0	0	0	0	0	0	0.0295699	0	0	0
Zhang	ERR589823			Asia	China					0	0	0	0	0	0	0	0	0	0	0	0	0.000537468	0	0	0	0	0	0	0	0	0	0	0	0	0	0	0	0	0	0	0	0	0	0	0	0.0140542	0	0	0
Zhang	ERR589824			Asia	China					0	0	0	0	0	0	0	0	0	0	0	0	1.88542e-05	0	0	0	0	0	0	0	0	0	0	0	0	0	0	0	0	0	0	0	0	0	0	0	0.0307503	0	0	0
Zhang	ERR589825			Asia	China					0	0	0	0	0	0	0	0	0	0	0	0	0.000431262	0	0	0	0	0	0	0	0	0	0	0	0	0	0	0	0	0	0	0	0	0	0	0	0.00958995	0	0	0
Zhang	ERR589826			Asia	China					0	0	0	0	0	0	0	0	0	0	0	0	8.76301e-05	0.000935358	0	0	0	0	0	0	0	0	0	0	0	0	0	0	0.000856843	0.000125762	4.88811e-05	0	0	3.15604e-05	0	0	0.00140397	0	0	0
Zhang	ERR589827			Asia	China					0	0	0	0	0	0	0	0	0	0	0	0	0.000223732	0	0	0	0	0	0	0	0	0	0	0	0	0	0	0	0	0	0	0	0	0	0	0	0.0301724	0	0	0
Zhang	ERR589828			Asia	China					0	0	0	0	0	0	0	0	0	0	0	0	0.000147055	0	0	0	0	0	0	0	0	0	0	0	0	0	0	0	0	0	0	0	0	0	0	0	0.0297619	0	0	0
Zhang	ERR589829			Asia	China					0	0	0	0	0	0	0	0	0	0	0	0	0.000556135	0	0	0	0	0	0	0	0	0	0	0	0	0	0	0	0	0	0	0	0	0	0	0	0	0	0	0
Zhang	ERR589830			Asia	China					0	0	0	0	0	0	0	0	0	0	0	0	0.000267106	0	0	0	0	0	0	0	0	0	0	0	0	0	0	0	0	0	0	0	0	0	0	0	0.0279441	0	0	0
Zhang	ERR589831			Asia	China					0	0	0	0	0	0	0	0	0	0	0	0	0.000126504	0	0	0	0	0	0	0	0	0	0	0	0	0	0	0	0	0	0	0	0	0	0	0	0.0324957	0	0	0
Zhang	ERR589832			Asia	China					0	0	0	0	0	0	0	0	0	0	0	0	0.000344821	0	0	0	0	0	0	0	0	0	0	0	0	0	0	0	0	0	0	0	0	0	0	0	0.0233004	0	0	0
Zhang	ERR589833			Asia	China					0	0	0	0	0	0	0	0	0	0	0	0	0.000245024	0	0	0	0	0	0	0	0	0	0	0	0	0	0	0	0	0	0	0	0	0	0	0	0.020141	0	0	0
Zhang	ERR589834			Asia	China					0	0	0	0	0	0	0	0	0	0	0	0	0	0	0	0	0	0	0	0	0	0	0	0	0	0	0	0	0	0	0	0	0	0	0	0	0.0416667	0	0	0
Zhang	ERR589835			Asia	China					0	0	0	0	0	0	0	0	0	0	0	0	0.00020918	0	0	0	0	0	0	0	0	0	0	0	0	0	0	0	0	0	0	0	0	0	0	0	0.0119407	0	0	0
Zhang	ERR589836			Asia	China					0	0	0	0	0	0	0	0	0	0	0	0	7.36906e-05	0.00172411	0	0	0	0	0	0	0	0	0	0	0	0	0	0	0	0	0	0	0	0	0	0	0.00113576	0	0.000128127	0
Zhang	ERR589837			Asia	China					0	0	0	0	0	0	0	0	0	0	0	0	0	0.000138091	0	0	0	0	0	0	0	0	0	0	0	0	0	0	0	0	0	0	0	0	0	0	0.010274	0	0	0
Zhang	ERR589838			Asia	China					0	0	0	0	0	0	0	0	0	0	0	0	0.000136743	0	0	0	0	0	0	0	0	0	0	0	0	0	0	0	0	0	0	0	0	0	0	0	0.0266473	0	0	0
Zhang	ERR589839			Asia	China					0	0	0	0	0	0	0	0	0	0	0	0	0.000166503	0	0	0	0	0	0	0	0	0	0	0	0	0	0	0	0	0	0	0	0	0	0	0	0	0	0	0
Zhang	ERR589840			Asia	China					0	0	0	0	0	0	0	0	0	0	0	0	6.93188e-05	0	0	0	0	0	0	0	0	0	0	0	0	0	0	0	0	0	0	0	0	0	0	0	0.0132275	0	0	0
Zhang	ERR589841			Asia	China					0	0	0	0	0	0	0	0	0	0	0	0	3.58779e-05	0	0	0	0	0	0	0	0	0	0	0	0	0	0	0	0	0	0	0	0	0	0	0	0.0383198	0	0	0
Zhang	ERR589842			Asia	China					0	0	0	0	0	0	0	0	0	0	0	0	4.41737e-05	0	0	0	0	0	0	0	0	0	0	0	0	0	0	0	0	0	0	0	0	0	0	0	0.0385802	0	0	0
Zhang	ERR589843			Asia	China					0	0	0	0	0	0.000559105	0	0	0	0	0	0.00412673	0.000207292	0.000220615	0	0	0	0	0	0	0	0	0	0	0	0	0	0	0	0	0.000118959	0	0	0.00013312	0	0	0.00865282	0	9.84726e-05	0
Zhang	ERR589844			Asia	China					0	0	0.00739372	0	0	0.000425139	0	0	0	0.00157116	0.000714166	0.00115527	0.000240985	0.000136955	0	0	0	0	0	0	0	0	0	0	0	0	0	0.0017329	0	0.000163974	0.000255634	0	0	0.000147874	0	0	0.00385089	0	0.000269035	0
Zhang	ERR589845			Asia	China					0	0	0	0	0	0	0	0	0	0	0	0	1.13829e-05	0	0	0	0	0	0	0	0	0	0	0	0	0	0	0	0	0	0	0	0	0	0	0	0.0396825	0	0	0
Zhang	ERR589846			Asia	China					0	0	0	0	0	0	0	0	0	0	0	0	6.45953e-05	0	0	0	0	0	0	0	0	0	0	0	0	0	0	0	0	0	0	0	0	0	0	0	0.0154867	0	0	0
Zhang	ERR589847			Asia	China					0	0	0	0	0	0	0	0	0	0	0	0	0.000255651	0	0	0	0	0	0	0	0	0	0	0	0	0	0	0	0	0	0	0	0	0	0	0	0.0185688	0	0	0
Zhang	ERR589848			Asia	China					0	0	0	0	0	0	0	0	0	0	0	0	7.45939e-05	0	0	0	0	0	0	0	0	0	0	0	0	0	0	0	0	0	0	0	0	0	0	0	0.0268502	0	0.000682123	0
Zhang	ERR589849			Asia	China					0	0	0	0	0	0	0	0	0	0	0	0	1.43404e-05	0	0	0	0	0	0	0	0	0	0	0	0	0	0	0	0	0	0	0	0	0	0	0	0.0409299	0	0	0
Zhang	ERR589850			Asia	China					0	0	0	0	0	0	0	0	0	0	0	0	0.000100444	2.92193e-05	0	0	0	0	0	0	0	0	0	0	0	0	0	0	0	0	0	0	0	0	0	0	0.0236056	0	0	0
Zhang	ERR589851			Asia	China					0	0	0	0	0	0	0	0	0	0	0	0	0.000433536	0	0	0	0	0	0	0	0	0	0	0	0	0	0	0	0	0	0	0	0	0	0	0	0.017927	0	0	0
Zhang	ERR589852			Asia	China					0	0	0	0	0	0	0	0	0	0	0	0	3.39667e-05	4.59221e-05	0	0	0	0	0	0	0	0	0	0	0	0	0	0	0	0	0	0	0	0	0	0	0.00336762	0	0.00201302	0
Zhang	ERR589853			Asia	China					0	0	0	0	0	0	0	0	0	0	0	0	7.68261e-05	0	0	0	0	0	0	0	0	0	0	0	0	0	0	0	0	0.000189012	0	0	0	0	0	0	0.0309245	0	0.000541792	0
Zhang	ERR589854			Asia	China					0	0	0	0	0	0	0	0	0	0	0	0	0.000539028	0	0	0	0	0	0	0	0	0	0	0	0	0	0	0	0	0	0	0	0	0	0	0	0.00783913	0	0.00100849	0
Zhang	ERR589855			Asia	China					0	0	0	0	0	0	0	0	0	0	0	0	0.000408189	0.000327898	0	0	0	0	0	0	0	0	0	0	0	0	0	0	0	0.000378117	0	0	0	0	0	0	0.0100733	0	0	0
Zhang	ERR589856			Asia	China					0	0	0	0	0	0	0	0	0	0	0	0	0.000155463	0	0	0	0	0	0	0	0	0	0	0	0	0	0	0	0	0	0	0	0	0	0	0	0.0250192	0	0	0
Zhang	ERR589857			Asia	China					0	0	0	0	0	0	0	0	0	0	0	0	1.77445e-05	0	0	0	0	0	0	0	0	0	0	0	0	0	0	0	0	0	0	0	0	0	0	0	0.0391463	0	0	0
Zhang	ERR589858			Asia	China					0	0	0	0	0	0	0	0	0	0	0	0	0.000551012	0	0	0	0	0	0	0	0	0	0	0	0	0	0	0	0	0	0	0	0	0	0	0	0.0125386	0	0	0
Zhang	ERR589859			Asia	China					0	0	0	0	0	0	0	0	0	0	0	0	0.000509114	3.99442e-05	0	0	0	0	0	0	0	0	0	0	0	0	0	0	0	0	0	0	0	0	0	0	0.0043448	0	0.000521376	0
Zhang	ERR589860			Asia	China					0	0	0	0	0	0	0	0	0	0	0	0	0.000120559	0	0	0	0	0	0	0	0	0	0	0	0	0	0	0	0	0	0	0	0	0	0	0	0.035473	0	0	0
Zhang	ERR589861			Asia	China					0	0	0	0	0	0	0	0	0	0	0	0	0.000298956	0	0	0	0	0	0	0	0	0	0	0	0	0	0	0	0	0	0	0	0	0	0	0	0.0250912	0	0	0
Zhang	ERR589862			Asia	China					0	0	0	0	0	0	0	0	0	0	0	0	0.000149717	0	0	0	0	0	0	0	0	0	0	0	0	0	0	0	0	0	0	0	0	0	0	0	0.0239641	0	0	0
Zhang	ERR589863			Asia	China					0	0	0	0	0	0	0	0	0	0	0	0	0.000223394	0	0	0	0	0	0	0	0	0	0	0	0	0	0	0	0	0	0	0	0	0	0	0	0.0299533	0	0	0
Zhang	ERR589864			Asia	China					0	0	0	0	0	0	0	0	0	0	0	0	0.00014846	0	0	0	0	0	0	0	0	0	0	0	0	0	0	0	0	0	0	0	0	0	0	0	0.0141243	0	0.00278616	0
Zhang	ERR589865			Asia	China					0	0	0	0	0	0	0	0	0	0	0	0	4.41737e-05	0	0	0	0	0	0	0	0	0	0	0	0	0	0	0	0	0	0	0	0	0	0	0	0.0222404	0	0	0
Zhang	ERR589866			Asia	China					0	0	0	0	0	0	0	0	0	0	0	0	0.000538294	0	0	0	0	0	0	0	0	0	0	0	0	0	0	0	0	0	0	0	0	0	0	0	0.0106932	0	0	0
Zhang	ERR589867			Asia	China					0	0	0	0	0	0	0	0	0	0	0	0	3.9223e-05	0	0	0	0	0	0	0	0	0	0	0	0	0	0	0	0	0	0	0	0	0	0	0	0.0396516	0	0	0
Zhang	ERR589868			Asia	China					0	0	0	0	0	0	0	0	0	0	0	0	0	0	0	0	0	0	0	0	0	0	0	0	0	0	0	0	0	0	0	0	0	0	0	0	0.0416667	0	0	0
Zhang	ERR589869			Asia	China					0	0	0	0	0	0	0	0	0	0	0	0	7.49925e-05	0	0	0	0	0	0	0	0	0	0	0	0	0	0	0	0	0	0	0	0	0	0	0	0.0228311	0	0	0
Zhang	ERR589870			Asia	China					0	0	0	0	0	0	0	0	0	0	0	0	0.000181867	0.00120968	0	0	0	0	0	0	0	0	0	0	0	0	0	0	0	0	0	0	0	0	0	0	0.00732323	0	0	0
Zhang	ERR589871			Asia	China					0	0	0	0	0	0	0	0	0	0	0	0	3.05681e-05	0	0	0	0	0	0	0	0	0	0	0	0	0	0	0	0	0	0	0	0	0	0	0	0.014702	0	0	0
Zhang	ERR589872			Asia	China					0	0	0	0	0	0	0	0	0	0	0	0	6.71859e-05	0	0	0	0	0	0	0	0	0	0	0	0	0	0	0	0	0	0	0	0	0	0	0	0.0246548	0	0	0
Zhang	ERR589873			Asia	China					0	0	0	0	0	0	0	0	0	0	0	0	0	0	0	0	0	0	0	0	0	0	0	0	0	0	0	0	0	0	0	0	0	0	0	0	0.0162602	0	0	0
Zhang	ERR589874			Asia	China					0	0	0	0	0	0.00018112	0	0	0	0.000878156	0.000923062	0.00141786	0.000304693	0.000175941	0	0	0	0	0	0	0	0	0	0	0	0	0	0	0.000654395	0.000286227	0.000221874	0	0.00548847	0.000241493	0	0	0.00114343	0.000274424	9.58603e-05	0
Zhang	ERR589875			Asia	China					0	0	0	0	0	0	0	0	0	0	0	0	0.000124909	0	0	0	0	0	0	0	0	0	0	0	0	0	0	0	0	0	0	0	0	0	0	0	0.00406725	0	0.00386295	0
HMP	SRS011061	F		North America	America		healthy			0	0	0	0	0	0	0	0	0	0	0	0	0	0	0	0	0	0	0	0	0	0	0	0	0	0	0	0	0	0	0	0	0	0	0	0	0.0416667	0	0	0
HMP	SRS011134	M		North America	America		healthy			0	0	0	0	0	0	0	0	0	0	0	0.00379096	0.000462505	0.000139213	0	0	0	0	0	0	0	0	0	0	0	0	0	0.00639724	0	0.000283885	0	0	0	0	0	0	0.00372326	0	0.000909718	0
HMP	SRS011239	F		North America	America		healthy			0	0	0	0	0	0	0	0	0	0	0	0	2.3741e-05	0	0	0	0	0	0	0	0	0	0	0	0	0	0	0	0	0	0	0	0	0	0	0	0.0253321	0	0	0
HMP	SRS011271	M		North America	America		healthy			0	0	0	0	0	0	0	0	0	0	0.00726156	0	0.00021179	0	0	0	0	0	0	0	0	0	0	0	0	0	0	0	0	0	0	0	0	0	0	0	0.0262417	0	0	0
HMP	SRS011452	M		North America	America		healthy			0	0	0	0	0	0	0	0	0	0	0	0	0.00081103	0	0	0	0	0	0	0	0	0	0	0	0	0	0	0	0	0	0	0	0	0	0	0	0	0	0	0
HMP	SRS011529	M		North America	America		healthy			0	0	0	0	0	0.000388821	0	0	0	0	0	0	0.000170977	3.6746e-05	0	0	0	0	0	0	0	0	0	0	0	0	0	0	0	0	9.37153e-05	0	0	0.000121507	0	0	0.0278453	0	8.32238e-05	0
HMP	SRS011586	F		North America	America		healthy			0	0	0	0	0	0	0	0	0	0	0	0	0.0001596	0	0	0	0	0	0	0	0	0	0	0	0	0	0	0	0	0	0	0	0	0	0	0	0.0334672	0	0	0
HMP	SRS012273	F		North America	America		healthy			0	0	0	0	0	0	0	0	0	0	0	0	6.13752e-05	0	0	0	0	0	0	0	0	0	0	0	0	0	0	0	0	0	0	0	0	0	0	0	0.0292793	0	0	0
HMP	SRS012849	M		North America	America		healthy			0	0	0	0	0	0	0	0	0	0	0	0	0.000380991	0	0	0	0	0	0	0	0	0	0	0	0	0	0	0	0	0	0	0	0	0	0	0	0.0184485	0	0.00059913	0
HMP	SRS012902	F		North America	America		healthy			0	0	0	0	0	0	0	0	0	0	0	0	0	0	0	0	0	0	0	0	0	0	0	0	0	0	0	0	0	0	0	0	0	0	0	0	0.0416667	0	0	0
HMP	SRS013098	F		North America	America		healthy			0	0	0	0	0	0	0	0	0	0	0	0	0.000387337	0	0	0	0	0	0	0	0	0	0	0	0	0	0	0	0	0	0	0	0	0	0	0	0.0172414	0	0	0
HMP	SRS013158	M		North America	America		healthy			0	0	0	0	0	0	0	0	0	0	0	0	0	0	0	0	0	0	0	0	0	0	0	0	0	0	0	0	0	0	0	0	0	0	0	0	0.0416667	0	0	0
HMP	SRS013382	M		North America	America		healthy			0	0	0	0	0	0	0	0	0	0	0	0	9.23958e-05	0	0	0	0	0	0	0	0	0	0	0	0	0	0	0	0	0	0	0	0	0	0	0	0.0369198	0	0	0
HMP	SRS013476	M		North America	America		healthy			0	0	0	0.0052578	0	0.000145862	0	0	0	0.000949796	0	0.000650158	0.000260806	0.000236628	0	0	0	0	0	0	0	0	0	0	0	0	0.00457938	0	0	3.10033e-05	0.000256214	0	0	0.000187698	0.00127205	0.000395749	0.00445217	0	0.000168445	0
HMP	SRS013521	F		North America	America		healthy			0	0	0	0	0	0	0	0	0	0	0	0	9.39894e-05	0	0	0	0	0	0	0	0	0	0	0	0	0	0	0	0	0	0	0	0	0	0	0	0.03558	0	3.9688e-05	0
HMP	SRS013638	M		North America	America		healthy			0	0	0	0	0	0	0	0	0	0	0	0	2.41858e-05	0.000236484	0	0	0	0	0	0	0	0	0	0	0	0	0	0	0	0	0	0	0	0	0	0	0.0306494	0	0	0
HMP	SRS013687	M		North America	America		healthy			0	0	0	0	0	0.000940476	0	0	0	0	0	0	0.000308964	9.00058e-05	0	0	0	0	0	0	0	0	0	0	0	0	0	0	0	0	0.000215299	0	0	0.000242063	0	0	0.00297619	0	0.000240541	0
HMP	SRS013940	M		North America	America		healthy			0	0	0	0	0	0	0	0	0	0	0	0	0.000358819	0	0	0	0	0	0	0	0	0	0	0	0	0	0	0	0	0	0	0	0	0	0	0	0	0	0.00381901	0
HMP	SRS014235	M		North America	America		healthy			0	0	0	0.00493131	0	9.86263e-05	0	0	0	0.000915815	0	0.00076318	0.000211399	0.000151973	0	0	0	0	0	0	0	0	0	0	0	0	0.00493131	0	0	0	0.000209843	0	0	0.00013385	0	0.00038159	0.00747035	0	6.75522e-05	0
HMP	SRS014287	M		North America	America		healthy			0	0	0	0	0	0	0	0	0	0	0	0	7.49321e-05	0	0	0	0	0	0	0	0	0	0	0	0	0	0	0	0	0	0	0	0	0	0	0	0.0362319	0	0	0
HMP	SRS014412	F		North America	America		healthy			0	0	0	0	0	0	0	0	0	0	0	0	6.24657e-05	0	0	0	0	0	0	0	0	0	0	0	0	0	0	0	0	0	0	0	0	0	0	0	0.0368266	0	0	0
HMP	SRS014534	F		North America	America		healthy			0	0	0	0	0	0	0	0	0	0	0	0	9.54153e-05	0	0	0	0	0	0	0	0	0	0	0	0	0	0	0	0	0	0	0	0	0	0	0	0.0367647	0	0	0
HMP	SRS014736	F		North America	America		healthy			0	0	0	0	0	0	0	0	0	0	0	0	0	0	0	0	0	0	0	0	0	0	0	0	0	0	0	0	0	0	0	0	0	0	0	0	0.0412931	0	0	0
HMP	SRS014948	M		North America	America		healthy			0	0	0	0	0	0	0	0	0	0	0	0	3.05226e-05	0.000278211	0.00896057	0	0	0	0	0	0	0	0	0	0	0	0	0	0	0	0	0	0	0	0	0	0.0194146	0	0	0
HMP	SRS014979	F		North America	America		healthy			0	0	0	0	0	0	0	0	0	0	0	0	0.000576327	0	0	0	0	0	0	0	0	0	0	0	0	0	0	0	0.00178086	0	5.47308e-05	0	0	0.00024866	0	0	0.00166131	0	0.000242259	0
HMP	SRS015065	F		North America	America		healthy			0	0	0	0	0	0	0	0	0	0	0.00345224	0	2.2399e-05	0.000102082	0	0	0	0	0	0	0	0	0	0	0	0	0	0	0	0	0	0	0	0	0	0	0.0354814	0	0	0
HMP	SRS015133	F		North America	America		healthy			0	0	0	0	0	0	0	0	0	0	0	0	0.000274072	0	0	0	0	0	0	0	0	0	0	0	0	0	0	0	0	0	0	0	0	0	0	0	0.0201149	0	0	0
HMP	SRS015190	F		North America	America		healthy			0	0	0	0	0	0	0	0	0	0	0	0	0	1.49389e-05	0	0	0	0	0	0	0	0	0	0	0	0	0	0	0	0	0	0	0	0	0	0	0.0398786	0	9.30441e-05	0
HMP	SRS015264	M		North America	America		healthy			0	0	0	0	0	0	0	0	0	0	0	0	3.12304e-05	0	0	0	0	0	0	0	0	0	0	0	0	0	0	0	0	0	0	0	0	0	0	0	0.0394945	0	0	0
HMP	SRS015369	F		North America	America		healthy			0	0	0	0	0	0	0	0	0	0	0	0	0.000177857	0	0	0	0	0	0	0	0	0	0	0	0	0	0	0	0	0	0	0	0	0	0	0	0.0325292	0	0	0
HMP	SRS015486	F		North America	America		healthy			0	0	0	0	0	0	0	0	0	0	0	0	0.000263266	0	0	0	0	0	0	0	0	0	0	0	0	0	0	0	0	0	0	0	0	0	0	0	0.0276323	0	0	0
HMP	SRS015578	M		North America	America		healthy			0	0	0	0	0	0	0	0	0	0	0	0	8.3325e-05	0	0	0	0	0	0	0	0	0	0	0	0	0	0	0	0	0	0	0	0	0	0	0	0.0338898	0	0	0
HMP	SRS015579	F		North America	America		healthy			0	0	0	0	0	0	0	0	0	0	0	0	0.000408201	0	0	0	0	0	0	0	0	0	0	0	0	0	0	0	0	0	0	0	0	0	0	0	0.0206954	0	0	0
HMP	SRS015794	M		North America	America		healthy			0	0	0	0	0	0	0	0	0	0	0	0	0.000757408	0	0	0	0	0	0	0	0	0	0	0	0	0	0	0	0	0	0	0	0	0	0	0	0.00275482	0	0	0
HMP	SRS015854	M		North America	America		healthy			0	0	0	0	0	0	0	0	0	0	0	0	0.000196427	0	0	0	0	0	0	0	0	0	0	0	0	0	0	0	0	0	0	0	0	0	0	0	0.0309423	0	0	0
HMP	SRS015890	M		North America	America		healthy			0	0	0	0	0	0	0	0	0	0	0	0	0.000733213	0	0	0	0	0	0	0	0	0	0	0	0	0	0	0	0	0	0	0	0	0	0	0	0	0	0	0
HMP	SRS015960	M		North America	America		healthy			0	0	0	0	0	0	0	0	0	0	0	0	0.000324412	0	0	0	0	0	0	0	0	0	0	0	0	0	0	0	0	0	0	0	0	0	0	0	0.025	0	0	0
HMP	SRS016095	F		North America	America		healthy			0	0	0	0	0	0.000393701	0	0	0	0	0	0	0.000336865	3.96876e-05	0	0	0	0	0	0	0	0	0	0	0	0	0	0	0	0	0.000104708	0	0	6.12423e-05	0	0	0.0188648	0	8.08974e-05	0
HMP	SRS016132	F		North America	America		healthy			0	0	0	0	0	0	0	0	0	0	0	0	0.000381459	0	0	0	0	0	0	0	0	0	0	0	0	0	0	0	0	0	0	0	0	0	0	0	0.0220692	0	0	0
HMP	SRS016335	M		North America	America		healthy			0	0	0	0	0	0	0	0	0	0	0	0	9.90357e-05	7.1632e-05	0	0	0	0	0	0	0	0	0	0	0	0	0	0	0	0	0	0	0	0	0	0	0.00344947	0	0.000756047	0
HMP	SRS016381	M		North America	America		healthy			0	0	0	0	0	0	0	0	0	0	0	0	0.00081103	0	0	0	0	0	0	0	0	0	0	0	0	0	0	0	0	0	0	0	0	0	0	0	0	0	0	0
HMP	SRS016438	M		North America	America		healthy			0	0	0	0	0	0	0	0	0	0	0	0	7.14114e-05	0	0	0	0	0	0	0	0	0	0	0	0	0	0	0	0	0	0	0	0	0	0	0	0.0379979	0	0	0
HMP	SRS016495	F		North America	America		healthy			0	0	0	0	0	0	0	0	0	0	0	0	0.000232796	0	0	0	0	0	0	0	0	0	0	0	0	0	0	0	0	0	0	0	0	0	0	0	0.0270062	0	0	0
HMP	SRS016585	F		North America	America		healthy			0	0	0	0	0	0	0	0	0	0	0	0	0	0	0	0	0	0	0	0	0	0	0	0	0	0	0	0	0	0	0	0	0	0	0	0	0.0416667	0	0	0
HMP	SRS016629	F		North America	America		healthy			0	0	0	0	0	0	0	0	0	0	0	0	8.1103e-05	0	0	0	0	0	0	0	0	0	0	0	0	0	0	0	0	0	0	0	0	0	0	0	0.00899123	0	0	0
HMP	SRS016753	M		North America	America		healthy			0	0	0	0	0	0	0	0	0	0	0	0	2.28167e-05	0	0	0	0	0	0	0	0	0	0	0	0	0	0	0	0	0	0	0	0	0	0	0	0.0404945	0	0	0
HMP	SRS016840	M		North America	America		healthy			0	0	0	0	0	0	0	0	0	0	0	0	0.000261895	0	0	0	0	0	0	0	0	0	0	0	0	0	0	0	0	0	0	0	0	0	0	0	0.0282118	0	0	0
HMP	SRS016897	M		North America	America		healthy			0	0	0	0	0	0	0	0	0	0	0	0	0.000161368	0	0	0	0	0	0	0	0	0	0	0	0	0	0	0	0	0	0	0	0	0	0	0	0.0333764	0	0	0
HMP	SRS016954	M		North America	America		healthy			0	0	0	0	0	0	0	0	0	0	0	0	0.000272317	0	0	0	0	0	0	0	0	0	0	0	0	0	0	0	0	0	0	0	0	0	0	0	0.0276764	0	0	0
HMP	SRS017191	M		North America	America		healthy			0	0	0	0	0	0	0	0	0	0	0	0	0	0	0	0	0	0	0	0	0	0	0	0	0	0	0	0	0	0	0	0	0	0	0	0	0.0374455	0	0	0
HMP	SRS017247	M		North America	America		healthy			0	0	0	0	0	0	0	0	0	0	0	0	0.000264107	0	0	0	0	0	0	0	0	0	0	0	0	0	0	0	0	0	0	0	0	0	0	0	0.0268544	0	0	0
HMP	SRS017248	M		North America	America		healthy			0	0	0	0	0	0	0	0	0	0	0	0	0.000270343	0	0	0	0	0	0	0	0	0	0	0	0	0	0	0	0	0	0	0	0	0	0	0	0.0277778	0	0	0
HMP	SRS017307	M		North America	America		healthy			0	0	0	0	0	0	0	0	0	0	0	0	0.000389667	0	0	0	0	0	0	0	0	0	0	0	0	0	0	0	0	0.000543814	0	0	0	0.000429119	0	0	0.0141762	0	0.000440875	0
HMP	SRS017375	M		North America	America		healthy			0	0	0	0	0	0	0	0	0	0	0	0	0	0	0	0	0	0	0	0	0	0	0	0	0	0	0	0	0	0	0	0	0	0	0	0	0.0416667	0	0	0
HMP	SRS017433	F		North America	America		healthy			0	0	0	0	0	0	0	0	0	0	0	0	4.49711e-05	0	0	0	0	0	0	0	0	0	0	0	0	0	0	0	0	0	0	0	0	0	0	0	0.0386393	0	0	0
HMP	SRS017521	F		North America	America		healthy			0	0	0	0	0	0	0	0	0	0	0	0	0.000162335	0	0	0	0	0	0	0	0	0	0	0	0	0	0	0	0	0	0	0	0	0	0	0	0.0330295	0	0	0
HMP	SRS017622	M		North America	America		healthy			0	0	0	0	0	0	0	0	0	0	0	0	0	0	0	0	0	0	0	0	0	0	0	0	0	0	0	0	0	0	0	0	0	0	0	0	0	0	0	0
HMP	SRS017701	F		North America	America		healthy			0	0	0	0	0	0	0	0	0	0	0	0	9.51208e-05	0	0	0	0	0	0	0	0	0	0	0	0	0	0	0	0	0	0	0	0	0	0	0	0.0364369	0	0	0
HMP	SRS017745	M		North America	America		healthy			0	0	0	0	0	0	0	0	0	0	0	0	0.000287785	0	0	0	0	0	0	0	0	0	0	0	0	0	0	0	0	0	0	0	0	0	0	0	0.0268817	0	0	0
HMP	SRS017859	M		North America	America		healthy			0	0	0	0	0	0	0	0	0	0	0	0	6.8911e-05	0	0	0	0	0	0	0	0	0	0	0	0	0	0	0	0	0	0	0	0	0	0	0	0.0381264	0	0	0
HMP	SRS017916	M		North America	America		healthy			0	0	0	0	0	0	0	0	0	0	0	0	0.00081103	0	0	0	0	0	0	0	0	0	0	0	0	0	0	0	0	0	0	0	0	0	0	0	0	0	0	0
HMP	SRS018049	M		North America	America		healthy			0	0	0	0	0	0	0	0	0	0	0	0	0	0	0	0	0	0	0	0	0	0	0	0	0	0	0	0	0	0	0	0	0	0	0	0	0	0	0	0
HMP	SRS018351	M		North America	America		healthy			0	0	0	0	0	0	0	0	0	0	0	0	0.00025274	0	0	0	0	0	0	0	0	0	0	0	0	0	0	0	0	0	0	0	0	0.000545736	0	0	0.022093	0	0	0
HMP	SRS018541	F		North America	America		healthy			0	0	0	0	0	0.000317003	0	0	0	0.00345821	0	0	0.000262942	0.000618783	0	0	0	0	0	0	0	0	0	0	0	0	0	0	0	0	0	0	0	0	0	0	0	0	9.86933e-05	0
HMP	SRS018575	M		North America	America		healthy			0	0	0	0	0	0	0	0	0	0	0	0	0.000715954	0	0	0	0	0	0	0	0	0	0	0	0	0	0	0	0	0	0.000623559	0	0	0	0	0	0	0	0	0
HMP	SRS018623	M		North America	America		healthy			0	0	0	0	0	0	0	0	0	0	0	0	0.000293186	4.03928e-05	0	0	0	0	0	0	0	0	0	0	0	0	0	0	0	0	0	0	0	0	0	0	0.0257695	0	0	0
HMP	SRS018656	F		North America	America		healthy			0	0	0	0	0	0	0	0	0	0	0	0	0	0	0	0	0	0	0	0	0	0	0	0	0	0	0	0	0	0	0	0	0	0	0	0	0	0	0	0
HMP	SRS018836	F		North America	America		healthy			0	0	0	0	0	0	0	0	0	0	0	0	0.000115727	0	0	0	0	0	0	0	0	0	0	0	0	0	0	0	0	0	0	0	0	0	0	0	0.0328693	0	0.000468805	0
HMP	SRS019030	M		North America	America		healthy			0	0	0	0	0	0	0	0	0	0	0	0	0.000219846	0	0	0	0	0	0	0	0	0	0	0	0	0	0	0	0	0	0	0	0	0	0	0	0.0303721	0	0	0
HMP	SRS019068	M		North America	America		healthy			0	0	0	0	0	0	0	0	0	0	0	0	7.61236e-05	0.00062149	0.000397213	0	0	0	0	0	0	0	0	0	0	0	0	0	0	0	5.59616e-05	0	0	3.00594e-05	0	0	0.0148512	0	1.38973e-05	0
HMP	SRS019161	M		North America	America		healthy			0	0	0	0	0	0	0	0	0	0	0	0	0.000224816	8.41306e-05	0	0	0	0	0	0	0	0	0	0	0	0	0	0	0	0	0	0	0	0	0	0	0.0223547	0	0.000336852	0.00285643
HMP	SRS019178	M		North America	America		healthy			0	0	0	0	0	0	0	0	0	0	0	0	0	0	0	0	0	0	0	0	0	0	0	0	0	0	0	0	0	0	0	0	0	0	0	0	0.0416667	0	0	0
HMP	SRS019286	F		North America	America		healthy			0	0	0	0	0	0	0	0	0	0	0	0	0.000391532	0	0	0	0	0	0	0	0	0	0	0	0	0	0	0	0	0	0	0	0	0	0	0	0.0215517	0	0	0
HMP	SRS019381	F		North America	America		healthy			0	0	0	0	0	0	0	0	0	0	0	0	0.000764897	9.37645e-06	0	0	0	0	0	0	0	0	0	0	0	0	0	0	0	0	0	0	0	0	0	0	0.00208686	0	1.4702e-05	0
HMP	SRS019397	M		North America	America		healthy			0	0	0	0	0	0	0	0	0	0	0	0	0.000297095	0	0	0	0	0	0	0	0	0	0	0	0	0	0	0	0	0	0	0	0	0	0	0	0.0257691	0	0	0
HMP	SRS019445	M		North America	America		healthy			0	0	0	0	0	0	0	0	0	0	0	0	0.000272538	0	0	0	0	0	0	0	0	0	0	0	0	0	0	0	0	0	0	0	0	0	0	0	0.0250271	0	0	0
HMP	SRS019496	F		North America	America		healthy			0	0	0	0	0	0	0	0	0	0	0	0	0.000406063	3.2694e-05	0	0	0	0	0	0	0	0	0	0	0	0	0	0	0	0	0	0	0	0	0	0	0.0191441	0	0	0
HMP	SRS019582	M		North America	America		healthy			0	0	0	0.00388787	0	0.000110497	0	0	0	0.000654798	0	0.00228497	0.000285611	0.000397698	0	0	0	0	0	0	0	0	0	0	0	0	0.00429711	0	0	0.000888906	0.00016653	0	0	0.000107769	0	0.000306937	0.00196098	0	0.000197617	0.00136416
HMP	SRS019601	F		North America	America		healthy			0	0	0	0	0	0	0	0	0	0	0	0	0.000280174	0	0	0	0	0	0	0	0	0	0	0	0	0	0	0	0	0	0	0	0	0	0	0	0.0272727	0	0	0
HMP	SRS019787	M		North America	America		healthy			0	0	0	0	0	0	0	0	0	0	0	0	0.000393359	0	0	0	0	0	0	0	0	0	0	0	0	0	0	0	0	0	0	0	0	0	0	0	0	0	0	0
HMP	SRS019808	F		North America	America		healthy			0	0	0	0	0	0	0	0	0	0	0	0	0	0	0	0	0	0	0	0	0	0	0	0	0	0	0	0	0	0	0	0	0	0	0	0	0.0381264	0	0	0
HMP	SRS019910	M		North America	America		healthy			0	0	0	0	0	0	0	0	0	0	0	0	7.373e-05	0	0	0	0	0	0	0	0	0	0	0	0	0	0	0	0	0	0	0	0	0	0	0	0.0378788	0	0	0
HMP	SRS019968	F		North America	America		healthy			0	0	0	0	0	0	0	0	0	0	0	0	0.000287926	0	0	0	0	0	0	0	0	0	0	0	0	0	0	0	0	0	0	0	0	0	0	0	0.0264874	0	0	0
HMP	SRS020233	M		North America	America		healthy			0	0	0	0	0	0	0	0	0	0	0	0	0.000356888	0	0	0	0	0	0	0	0	0	0	0	0	0	0	0	0	0	0	0	0	0	0	0	0.0211902	0	0	0
HMP	SRS020271	M		North America	America		healthy			0	0	0	0	0	0	0	0	0	0	0	0	0.000380688	0	0	0	0	0	0	0	0	0	0	0	0	0	0	0	0	0	0	0	0	0	0	0	0.0221088	0	0	0
HMP	SRS020394	M		North America	America		healthy			0	0	0	0.00494875	0	0	0	0	0	0.000848356	0	0.000765877	0.000173444	0.000172465	0	0	0	0	0	0	0	0	0	0	0	0	0.00424178	0	0	0	0.00025383	0	0	0.00012961	0	0.000412395	0.0151555	0	8.9581e-05	0
HMP	SRS020508	M		North America	America		healthy			0	0	0	0	0	0	0	0	0	0	0	0	4.50572e-05	0	0	0	0	0	0	0	0	0	0	0	0	0	0	0	0	0	0	0	0	0	0	0	0.0393519	0	0	0
HMP	SRS020622	M		North America	America		healthy			0	0	0	0	0	0	0	0	0	0	0	0	0.000208441	0	0	0	0	0	0	0	0	0	0	0	0	0	0	0	0	0	0	0	0	0	0	0	0.030958	0	0	0
HMP	SRS020869	M		North America	America		healthy			0	0	0	0	0	0	0	0	0	0	0	0	6.47098e-05	0	0	0	0	0	0	0	0	0	0	0	0	0	0	0	0	0	0	0	0	0	0	0	0.0363475	0	0	0
HMP	SRS021153	F		North America	America		healthy			0	0	0	0	0	0	0	0	0	0	0	0	7.05243e-05	0	0	0	0	0	0	0	0	0	0	0	0	0	0	0	0	0	0	0	0	0	0	0	0.0380435	0	0	0
HMP	SRS021219	F		North America	America		healthy			0	0	0	0	0	0	0	0	0	0	0	0	0.000105348	0	0	0	0	0	0	0	0	0	0	0	0	0	0	0	0	0	0	0	0	0	0	0	0.0362544	0	0	0
HMP	SRS021484	M		North America	America		healthy			0	0	0	0	0	0	0	0	0	0	0	0	0.000209847	0	0	0	0	0	0	0	0	0	0	0	0	0	0	0	0	0	0	0	0	0	0	0	0.0291375	0	0	0
HMP	SRS021948	F		North America	America		healthy			0	0	0	0	0	0	0	0	0	0	0	0	0.000326084	0	0	0	0	0	0	0	0	0	0	0	0	0	0	0	0	0	0	0	0	0	0	0	0.0243414	0	0	0
HMP	SRS022137	F		North America	America		healthy			0	0	0	0	0	0	0	0	0	0	0.00273493	0	9.75969e-05	0	0	0	0	0	0	0	0	0	0	0	0	0	0	0	0	0	0	0	0	0	0	0	0.0350983	0	0	0
HMP	SRS022524	F		North America	America		healthy			0	0	0	0	0	0	0	0	0	0	0	0	0.000201956	0	0	0	0	0	0	0	0	0	0	0	0	0	0	0	0	0	0	0	0	0	0	0	0.0312912	0	0	0
HMP	SRS023176	M		North America	America		healthy			0	0	0	0	0	0	0	0	0	0	0	0	1.59025e-05	0	0	0	0	0	0	0	0	0	0	0	0	0	0	0	0	0	0	0	0	0	0	0	0.0408497	0	0	0
HMP	SRS023346	F		North America	America		healthy			0	0	0	0	0	0	0	0	0	0	0	0	0.000782344	0	0	0	0	0	0	0	0	0	0	0	0	0	0	0	0	0	0	0	0	0	0	0	0	0	0	0
HMP	SRS023583	F		North America	America		healthy			0	0	0	0	0	0	0	0	0	0	0	0	7.68586e-05	0	0	0	0	0	0	0	0	0	0	0	0	0	0	0	0	0	0	0	0	0	0	0	0.0377181	0	0	0
HMP	SRS023715	M		North America	America		healthy			0	0	0	0	0	0	0	0	0	0	0	0	0.00067972	0	0	0	0	0	0	0	0	0	0	0	0	0	0	0	0	0	0	0	0	0	0	0	0	0	0	0
HMP	SRS024009	F		North America	America		healthy			0	0	0	0	0	0	0	0	0	0	0	0	8.1103e-05	0	0	0	0	0	0	0	0	0	0	0	0	0	0	0	0	0	0	0	0	0	0	0	0.0269608	0	0	0
HMP	SRS024076	M		North America	America		healthy			0	0	0	0	0	0	0	0	0	0	0	0	0.000189335	0	0	0	0	0	0	0	0	0	0	0	0	0	0	0	0	0	0	0	0	0	0	0	0.0319396	0	0	0
HMP	SRS024132	M		North America	America		healthy			0	0	0	0.00479731	0	0.000177501	0	0	0	0.00100744	0	0.000679619	0.000345111	0.000256792	0	0	0	0	0	0	0	0	0	0	0	0	0.00479731	0	0	3.35296e-05	0.000219452	0	0	0.000187095	0	0.000399776	0.000449748	0	0.000170863	0
HMP	SRS024265	F		North America	America		healthy			0	0	0	0	0	0	0	0	0	0	0	0	0.000290462	0	0	0	0	0	0	0	0	0	0	0	0	0	0	0	0	0	0	0	0	0	0	0	0.0258398	0	0	0.00361757
HMP	SRS024331	M		North America	America		healthy			0	0	0	0	0	0	0	0	0	0	0	0	0.000111685	0	0	0	0	0	0	0	0	0	0	0	0	0	0	0	0	0	0	0	0	0	0	0	0.0320643	0	0.000305154	0
HMP	SRS024388	F		North America	America		healthy			0	0	0	0	0	0	0	0	0	0	0	0	0.00081103	0	0	0	0	0	0	0	0	0	0	0	0	0	0	0	0	0	0	0	0	0	0	0	0	0	0	0
HMP	SRS024435	M		North America	America		healthy			0	0	0	0	0	0	0	0	0	0	0.000517152	0.00373499	0.000341273	0.000201578	0	0	0	0.00316037	0	0	0	0	0	0	0	0	0	0	0	0.000352183	0.00014671	0	0	0	0	0	0.00351951	0	0.000200721	0
HMP	SRS024549	M		North America	America		healthy			0	0	0	0	0	0	0	0	0	0	0	0	0.000202758	0	0	0	0	0	0	0	0	0	0	0	0	0	0	0	0	0	0	0	0	0	0	0	0.03125	0	0	0
HMP	SRS024663	M		North America	America		healthy			0	0	0	0	0	0	0	0	0	0	0	0	0.00081103	0	0	0	0	0	0	0	0	0	0	0	0	0	0	0	0	0	0	0	0	0	0	0	0	0	0	0
HMP	SRS042231	M		North America	America		healthy			0	0	0	0	0	0	0	0	0	0	0	0	5.85279e-05	0	0	0	0	0	0	0	0	0	0	0	0	0	0	0	0	0	0	0	0	0	0	0	0.0386598	0	0	0
HMP	SRS042284	F		North America	America		healthy			0	0	0	0	0	0	0	0	0	0	0	0	7.373e-05	0	0	0	0	0	0	0	0	0	0	0	0	0	0	0	0	0	0	0	0	0	0	0	0.0378788	0	0	0
HMP	SRS042600	F		North America	America		healthy			0	0	0	0	0	0	0	0	0	0	0	0	0.000120318	0	0	0	0	0	0	0	0	0	0	0	0	0	0	0	0	0	0	0	0	0	0	0	0.0320513	0	0	0
HMP	SRS042628	M		North America	America		healthy			0	0	0	0	0	0	0	0	0	0	0	0	0.000405515	0	0	0	0	0	0	0	0	0	0	0	0	0	0	0	0	0	0	0	0	0	0	0	0	0	0.00342466	0
HMP	SRS042690	M		North America	America		healthy			0	0	0	0	0	0	0	0	0	0	0	0	0.000233418	0	0	0	0	0	0	0	0	0	0	0	0	0	0	0	0	0	0	0	0	0	0	0	0.0264228	0	0	0
HMP	SRS042893	F		North America	America		healthy			0	0	0	0	0	0	0	0	0	0	0	0	0.00081103	0	0	0	0	0	0	0	0	0	0	0	0	0	0	0	0	0	0	0	0	0	0	0	0	0	0	0
HMP	SRS042966	F		North America	America		healthy			0	0	0	0	0	0	0	0	0	0	0	0	0.000549407	0	0	0	0	0	0	0	0	0	0	0	0	0	0	0	0	0	0	0	0	0	0	0	0.0134409	0	0	0
HMP	SRS043667	M		North America	America		healthy			0	0	0	0	0	0	0	0	0	0	0	0	1.43902e-05	0	0	0	0	0	0	0	0	0	0	0	0	0	0	0	0	0	0	0	0	0	0	0	0.0384433	0	0	0
HMP	SRS044365	M		North America	America		healthy			0	0	0	0	0	0	0	0	0	0	0	0	6.62065e-05	0	0	0	0	0	0	0	0	0	0	0	0	0	0	0	0	0	0	0	0	0	0	0	0.0382653	0	0	0
HMP	SRS044535	M		North America	America		healthy			0	0	0	0	0	0	0	0	0	0	0	0	0.00019176	0	0	0	0	0	0	0	0	0	0	0	0	0	0	0	0	0	0	0	0	0	0	0	0.0116525	0	0	0
HMP	SRS044973	M		North America	America		healthy			0	0	0	0	0	0	0	0	0	0	0	0	0.00029831	0.000301261	0	0	0	0	0	0	0	0	0	0	0	0	0	0	0	0.0021011	0	0	0	0	0	0	0	0	0	0
HMP	SRS045324	F		North America	America		healthy			0	0	0	0	0	0	0	0	0	0	0	0	0	0	0	0	0	0	0	0	0	0	0	0	0	0	0	0	0	0	0	0	0	0	0	0	0	0	0	0
HMP	SRS045645	M		North America	America		healthy			0	0	0	0	0	0	0	0	0	0	0	0	5.74181e-05	0	0	0	0	0	0	0	0	0	0	0	0	0	0	0	0	0	0	0	0	0	0	0	0.0387168	0	0	0
HMP	SRS045713	M		North America	America		healthy			0	0	0	0	0	0	0	0	0	0	0	0	0.000310769	0	0	0	0	0	0	0	0	0	0	0	0	0	0	0	0	0	0	0	0	0	0	0	0.0257009	0	0	0
HMP	SRS045739	M		North America	America		healthy			0	0	0	0	0	0	0	0	0	0	0	0	2.50991e-05	0	0	0	0	0	0	0	0	0	0	0	0	0	0	0	0	0	0	0	0	0	0	0	0.0403772	0	0	0
HMP	SRS045826	F		North America	America		healthy			0	0	0	0	0	0	0	0	0	0	0	0	0.000453709	0	0	0	0	0	0	0	0	0	0	0	0	0	0	0	0	0	0	0	0	0	0	0	0.0170068	0	0	0
HMP	SRS045936	M		North America	America		healthy			0	0	0	0	0	0	0	0	0	0	0	0	0.000198106	0	0	0	0	0	0	0	0	0	0	0	0	0	0	0	0	0	0	0	0	0	0	0	0.031489	0	0	0
HMP	SRS045938	M		North America	America		healthy			0	0	0	0	0	0	0	0	0	0	0	0	4.19498e-05	0	0	0	0	0	0	0	0	0	0	0	0	0	0	0	0	0	0	0	0	0	0	0	0.0395115	0	0	0
HMP	SRS046717	M		North America	America		healthy			0	0	0	0	0	0	0	0	0	0	0	0	0.00081103	0	0	0	0	0	0	0	0	0	0	0	0	0	0	0	0	0	0	0	0	0	0	0	0	0	0	0
HMP	SRS046810	M		North America	America		healthy			0	0	0	0	0	0	0	0	0	0	0	0	0	0	0	0	0	0	0	0	0	0	0	0	0	0	0	0	0	0	0	0	0	0	0	0	0.0416667	0	0	0
HMP	SRS047014	M		North America	America		healthy			0	0	0	0	0	0	0	0	0	0	0.000894188	0	2.96301e-05	2.54967e-05	0	0	0	0	0	0	0	0	0	0	0	0	0	0	0	0	0	0	0	0	0	0	0.0351288	0	0	0
HMP	SRS047433	F		North America	America		healthy			0	0	0	0	0	0	0	0	0	0	0	0	0.000295431	0	0	0	0	0	0	0	0	0	0	0	0	0	0	0	0	0	0	0	0	0	0	0	0.0138504	0	0.00189732	0
HMP	SRS048060	F		North America	America		healthy			0	0	0	0	0	0	0	0	0	0	0	0	0.00081103	0	0	0	0	0	0	0	0	0	0	0	0	0	0	0	0	0	0	0	0	0	0	0	0	0	0	0
HMP	SRS048164	M		North America	America		healthy			0	0	0	0	0	0	0	0	0	0	0	0	8.71063e-05	0	0	0	0	0	0	0	0	0	0	0	0	0	0	0	0	0	0	0	0	0	0	0	0.0362845	0	0	0
HMP	SRS048654	F		North America	America		healthy			0	0	0	0	0	0	0	0	0	0	0	0	0.000114478	0	0	0	0	0	0	0	0	0	0	0	0	0	0	0	0	0	0	0	0	0	0	0	0.0334781	0	0	0
HMP	SRS048870	F		North America	America		healthy			0	0	0	0.00523059	0	0.000170915	0	0	0	0.00111979	0	0.000859486	0.000298923	0.000247003	0	0	0	0	0	0	0	0	0	0	0	0	0.00523059	0	0	4.91135e-05	0.000239428	0	0	0.000221011	0.00117872	0.000472717	0.00228378	0	0.000195277	0
HMP	SRS048981	M		North America	America		healthy			0	0	0	0	0	0	0	0	0	0	0	0	0.00081103	0	0	0	0	0	0	0	0	0	0	0	0	0	0	0	0	0	0	0	0	0	0	0	0	0	0	0
HMP	SRS049402	F		North America	America		healthy			0	0	0	0	0	0	0	0	0	0	0	0	0.000105787	0	0	0	0	0	0	0	0	0	0	0	0	0	0	0	0	0	0	0	0	0	0	0	0.0362319	0	0	0
HMP	SRS049712	M		North America	America		healthy			0	0	0	0	0	0	0	0	0	0	0	0	9.74796e-05	7.10815e-05	0	0	0	0	0	0	0	0	0	0	0	0	0	0	0	0	0	0	0	0	0	0	0.0333868	0	0	0
HMP	SRS049900	M		North America	America		healthy			0	0	0	0	0	0	0	0	0	0	0	0	0	0	0	0	0	0	0	0	0	0	0	0	0	0	0	0	0	0	0	0	0	0	0	0	0.0416667	0	0	0
HMP	SRS049995	F		North America	America		healthy			0	0	0	0	0	0	0	0	0	0	0	0	0.000133717	0	0	0	0	0	0	0	0	0	0	0	0	0	0	0	0.000805243	6.56605e-05	0	0	0	0.000137637	0	0	0.0278666	0	0.000155349	0
HMP	SRS050422	M		North America	America		healthy			0	0	0	0	0	0	0	0	0	0	0	0	0	0	0	0	0	0	0	0	0	0	0	0	0	0	0	0	0	0	0	0	0	0	0	0	0.0371609	0	0	0
HMP	SRS050520	F		North America	America		healthy			0	0	0	0	0	0	0	0	0	0	0	0	0.000466006	0	0	0	0	0	0	0	0	0	0	0	0	0	0	0	0	0	0	0	0	0	0	0	0.0177256	0	0	0
HMP	SRS050801	M		North America	America		healthy			0	0	0	0	0	0.00292135	0	0	0	0	0	0	0.000109352	0	0	0	0	0	0	0	0	0	0	0	0	0	0	0	0	0	0	0	0	0	0	0	0.0299625	0	0	0
HMP	SRS051031	M		North America	America		healthy			0	0	0	0	0	0.000806568	0	0	0	0	0	0	0.000473574	7.01093e-05	0	0	0	0	0	0	0	0	0	0	0	0	0	0	0	0	0.00019653	0	0	0.00019963	0	0	0.00684215	0	0.000181943	0
HMP	SRS051610	F		North America	America		healthy			0	0	0	0	0	0	0	0	0	0	0	0	0	0	0	0	0	0	0	0	0	0	0	0	0	0	0	0	0	0	0	0	0	0	0	0	0.0409226	0	0	0
HMP	SRS051882	F		North America	America		healthy			0	0	0	0	0	0	0	0	0	0	0	0	7.58591e-05	0	0	0	0	0	0	0	0	0	0	0	0	0	0	0	0	0	0	0	0	0	0	0	0.0366185	0	0	0
HMP	SRS052027	M		North America	America		healthy			0	0	0	0	0	0	0	0	0	0	0	0	0.000132493	0	0	0	0	0	0	0	0	0	0	0	0	0	0	0	0	0	0	0	0	0	0	0	0.0275209	0	0	0
HMP	SRS052078	M		North America	America		healthy			0	0	0	0	0	0	0	0	0	0	0	0	0	0	0	0	0	0	0	0	0	0	0	0	0	0	0	0	0	0	0	0	0	0	0	0	0	0	0	0
HMP	SRS052697	F		North America	America		healthy			0	0	0	0	0	0	0	0	0	0	0	0	0.000445013	0	0	0	0	0	0	0	0	0	0	0	0	0	0	0	0	0	0	0	0	0	0	0	0.0128517	0	0	0
HMP	SRS053087	F		North America	America		healthy			0	0	0	0	0	0	0	0	0	0	0	0	0.000230503	0	0	0	0	0	0	0	0	0	0	0	0	0	0	0	0	0	0	0	0	0	0	0	0.0298246	0	0	0
HMP	SRS053290	F		North America	America		healthy			0	0	0	0	0	0	0	0	0	0	0	0	0.000307632	0	0	0	0	0	0	0	0	0	0	0	0	0	0	0	0	0	0	0	0	0	0	0	0.0258621	0	0	0
HMP	SRS053356	M		North America	America		healthy			0	0	0	0	0	0.00137255	0	0	0	0	0	0	0.000337267	0.000108713	0	0	0	0	0	0	0	0	0	0	0	0	0	0	0	0	0.000269434	0	0	0.000321351	0	0	0.00510621	0	0.000318963	0
HMP	SRS053398	F		North America	America		healthy			0	0	0	0	0	0	0	0	0	0	0	0	0.000184506	0	0	0	0	0	0	0	0	0	0	0	0	0	0	0	0	0	0	0	0	0	0	0	0.031824	0	0	0
HMP	SRS053573	M		North America	America		healthy			0	0	0	0	0	0	0	0	0	0	0	0	0.00081103	0	0	0	0	0	0	0	0	0	0	0	0	0	0	0	0	0	0	0	0	0	0	0	0	0	0	0
HMP	SRS053587	M		North America	America		healthy			0	0	0	0	0	0	0	0	0	0	0	0	0.00040953	0	0	0	0	0	0	0	0	0	0	0	0	0	0	0	0	0	0.00223826	0	0	0	0	0	0	0	0	0
HMP	SRS054352	M		North America	America		healthy			0	0	0	0	0	0	0	0	0	0	0	0	0.000255184	0	0	0	0	0	0	0	0	0	0	0	0	0	0	0	0	0	0	0	0	0	0	0	0.0285566	0	0	0
HMP	SRS054590	F		North America	America		healthy			0	0	0	0	0	0	0	0	0	0	0	0	0	0	0	0	0	0	0	0	0	0	0	0	0	0	0	0	0	0	0	0	0	0	0	0	0	0	0	0
HMP	SRS054753	F		North America	America		healthy			0	0	0	0	0	0	0	0	0	0	0	0	0.000130012	0	0	0	0	0	0	0	0	0	0	0	0	0	0	0	0	0	0	0	0	0	0	0	0.0349873	0	0	0
HMP	SRS054869	M		North America	America		healthy			0	0	0	0	0	0	0	0	0	0	0	0	0.000110983	0	0	0	0	0	0	0	0	0	0	0	0	0	0	0	0	0	0	0	0	0	0	0	0.0359649	0	0	0
HMP	SRS054905	F		North America	America		healthy			0	0	0	0	0	0.000189766	0	0	0	0	0	0	0.000277306	0.00030505	0	0	0	0.00104484	0	0	0.00762453	0	0	0	0	0	0	0	0	0.000173078	0.000292905	0	0	0.000264317	0	0	0.00183554	0.000377968	0	0
HMP	SRS055017	M		North America	America		healthy			0	0	0	0	0	0	0	0	0	0	0	0	0.000174628	0.000194676	0	0	0	0	0	0	0	0	0	0	0	0	0	0	0	0	0	0	0	0	0	0	0.0101739	0	0	0
HMP	SRS055533	M		North America	America		healthy			0	0	0	0	0	0	0	0	0	0	0	0	2.92324e-05	0	0	0	0	0	0	0	0	0	0	0	0	0	0	0	0	0	0	0	0	0	0	0	0.0401649	0	0	0
HMP	SRS055982	F		North America	America		healthy			0	0	0	0	0	0	0	0	0	0	0	0	9.15987e-05	0	0	0	0	0	0	0	0	0	0	0	0	0	0	0	0	0	0	0	0	0	0	0	0.0352941	0	0	0
HMP	SRS056273	M		North America	America		healthy			0	0	0	0	0	0	0	0	0	0	0	0	0.000187161	0	0	0	0	0	0	0	0	0	0	0	0	0	0	0	0	0	0	0	0	0	0	0	0.0320513	0	0	0
HMP	SRS057478	F		North America	America		healthy			0	0	0	0	0	0	0	0	0	0	0	0	0.00081103	0	0	0	0	0	0	0	0	0	0	0	0	0	0	0	0	0	0	0	0	0	0	0	0	0	0	0
HMP	SRS057480	F		North America	America		healthy			0	0	0	0	0	0	0	0	0	0	0	0	0.000377866	0	0	0	0	0	0	0	0	0	0	0	0	0	0	0	0	0	0	0	0	0	0	0	0.0222538	0	0	0
HMP	SRS057717	F		North America	America		healthy			0	0	0	0	0	0	0	0	0	0	0	0	0.00081103	0	0	0	0	0	0	0	0	0	0	0	0	0	0	0	0	0	0	0	0	0	0	0	0	0	0	0
HMP	SRS058070	M		North America	America		healthy			0	0	0	0	0	0	0	0	0	0	0	0	0.000426569	0.000186594	0	0	0	0	0	0	0	0	0	0	0	0	0	0	0	0.00169907	0	0	0	0	0	0	0	0	0	0
HMP	SRS058268	M		North America	America		healthy			0	0	0	0	0	0	0	0	0	0	0	0	4.59074e-05	0	0	0	0	0	0	0	0	0	0	0	0	0	0	0	0	0	0	0	0	0	0	0	0.0393082	0	0	0
HMP	SRS058723	F		North America	America		healthy			0	0	0	0	0	0	0	0	0	0	0	0	0	8.8141e-06	0	0	0	0	0	0	0	0	0	0	0	0	0	0	0	0	0	0	0	0	0	0	0.0403916	0	0	0
HMP	SRS058770	M		North America	America		healthy			0	0	0	0	0	0	0	0	0	0	0	0	0.000743739	0	0	0	0	0	0	0	0	0	0	0	0	0	0	0	0	0	0	0	0	0	0	0	0	0	0	0
HMP	SRS062654	F		North America	America		healthy			0	0	0	0	0	0	0	0	0	0	0	0	0.000116358	7.55509e-05	0	0	0	0	0	0	0	0	0	0	0	0	0	0	0	0	0	0	0	0	0	0	0.0321199	0	0	0
HMP	SRS062701	F		North America	America		healthy			0	0	0	0	0	0	0	0	0	0	0	0	6.44665e-05	0	0	0	0	0	0	0	0	0	0	0	0	0	0	0	0	0	0	0	0	0	0	0	0.0363248	0	0	0
HMP	SRS062716	F		North America	America		healthy			0	0	0	0	0	0	0	0	0	0	0	0	0.000146572	0.00034007	0	0	0	0	0	0	0	0	0	0	0	0	0	0	0	0	0	0	0	0	0	0	0.0271084	0	0	0
HMP	SRS063040	F		North America	America		healthy			0	0	0	0	0	0	0	0	0	0	0	0	0.000115457	0	0	0	0	0	0	0	0	0	0	0	0	0	0	0	0	0	0	0	0	0	0	0	0.0319842	0	0	0
HMP	SRS063127	M		North America	America		healthy			0	0	0	0	0	0	0	0	0	0	0	0	0	0	0	0	0	0	0	0	0	0	0	0	0	0	0	0	0	0	0	0	0	0	0	0	0.0409644	0	0	0
HMP	SRS063190	F		North America	America		healthy			0	0	0	0	0	0	0	0	0	0	0.0088078	0	1.6838e-05	3.48811e-05	0	0	0	0	0	0	0	0	0	0	0	0	0	0	0	0	0	0	0	0	0	0	0.0360438	0	0	0
HMP	SRS063489	F		North America	America		healthy			0	0	0	0	0	0	0	0	0	0	0	0	0.000101574	9.32314e-05	0	0	0	0	0	0	0	0	0	0	0	0	0	0	0	0	0	0	0	0	0	0	0.0345215	0	0	0
HMP	SRS063518	F		North America	America		healthy			0	0	0	0	0	0	0	0	0	0	0	0	0	0	0	0	0	0	0	0	0	0	0	0	0	0	0	0	0	0	0	0	0	0	0	0	0.0399042	0	0	0
HMP	SRS063813	M		North America	America		healthy			0	0	0	0	0	0	0	0	0	0	0	0	0.00027663	0	0	0	0	0	0	0	0	0	0	0	0	0	0	0	0	0	0	0	0	0	0	0	0.0274548	0	0	0
HMP	SRS063928	F		North America	America		healthy			0	0	0	0	0	0	0	0	0	0	0	0	0.000160203	0	0	0	0	0	0	0	0	0	0	0	0	0	0	0	0	0	0	0	0	0	0	0	0.0334362	0	0	0
HMP	SRS063985	F		North America	America		healthy			0	0	0	0	0	0	0	0	0	0	0	0	0.000276373	0	0	0	0	0	0	0	0	0	0	0	0	0	0	0	0	0	0	0	0	0	0	0	0.0263321	0	0	0
HMP	SRS064232	F		North America	America		healthy			0	0	0	0	0	0	0	0	0	0	0	0	0.000130445	0	0	0	0	0	0	0	0	0	0	0	0	0	0	0	0	0	0	0	0	0	0	0	0.034965	0	0	0
HMP	SRS064276	F		North America	America		healthy			0	0	0	0	0	0	0	0	0	0	0	0	0.000765973	0.000112007	0	0	0	0	0	0	0	0	0	0	0	0	0	0	0	0	0	0	0	0	0	0	0	0	0	0
HMP	SRS064645	M		North America	America		healthy			0	0	0	0	0	0	0	0	0	0	0	0	0	0	0	0	0	0	0	0	0	0	0	0	0	0	0	0	0	0	0	0	0	0	0	0	0.0416667	0	0	0
HMP	SRS064662	F		North America	America		healthy			0	0	0	0	0	0	0	0	0	0	0	0	0	0	0	0	0	0	0	0	0	0	0	0	0	0	0	0	0	0	0	0	0	0	0	0	0.0416667	0	0	0
HMP	SRS064757	F		North America	America		healthy			0	0	0	0	0	0	0	0	0	0	0	0	0.000203281	0	0	0	0	0	0	0	0	0	0	0	0	0	0	0	0	0	0	0	0	0	0	0	0.0209948	0	0	0
HMP	SRS064973	M		North America	America		healthy			0	0	0	0	0	0	0	0	0	0	0	0	0.000436038	0	0	0	0	0	0	0	0	0	0	0	0	0	0	0	0	0	0	0	0	0	0	0	0	0	0	0
HMP	SRS065176	F		North America	America		healthy			0	0	0	0	0	0	0	0	0	0	0	0	0.000332355	0	0	0	0	0	0	0	0	0	0	0	0	0	0	0	0	0	0	0	0	0	0	0	0.0225515	0	0	0
HMP	SRS065397	F		North America	America		healthy			0	0	0	0	0	0	0	0	0	0	0	0	0.000103612	0	0	0	0	0	0	0	0	0	0	0	0	0	0	0	0	0	0	0	0	0	0	0	0.0312041	0	0	0
HMP	SRS074586	F		North America	America		healthy			0	0	0	0	0	0	0	0	0	0	0	0	0.000166115	0	0	0	0	0	0	0	0	0	0	0	0	0	0	0	0	0	0	0	0	0	0	0	0.0331325	0	0	0
HMP	SRS074964	M		North America	America		healthy			0	0	0	0	0	0	0	0	0	0	0	0	2.2346e-05	0	0	0	0	0	0	0	0	0	0	0	0	0	0	0	0	0	0	0	0	0	0	0	0.0405186	0	0	0
HMP	SRS075341	M		North America	America		healthy			0	0	0	0	0	0	0	0	0	0	0	0	0.000564859	0.000132827	0	0	0	0	0	0	0	0	0	0	0	0	0	0	0	0.00118912	0	0	0	0	0	0	0	0	0	0
HMP	SRS075398	F		North America	America		healthy			0	0	0	0	0	0	0	0	0	0	0	0	0	0	0	0	0	0	0	0	0	0	0	0	0	0	0	0	0	0	0	0	0	0	0	0	0.0416667	0	0	0
HMP	SRS075399	F		North America	America		healthy			0	0	0	0	0	0	0	0	0	0	0	0	0	0	0	0	0	0	0	0	0	0	0	0	0	0	0	0	0	0	0	0	0	0	0	0	0.0416667	0	0	0
HMP	SRS075716	F		North America	America		healthy			0	0	0	0	0	0	0	0	0	0	0	0	4.53054e-05	0	0	0	0	0	0	0	0	0	0	0	0	0	0	0	0	0	0	0	0	0	0	0	0.0393391	0	0	0
HMP	SRS075773	M		North America	America		healthy			0	0	0	0	0	0	0	0	0	0	0	0	0.00035476	0	0	0	0	0	0	0	0	0	0	0	0	0	0	0	0	0	0	0	0	0	0	0	0.0209677	0	0	0
HMP	SRS075878	F		North America	America		healthy			0	0	0	0	0	0	0	0	0	0	0	0	0.000206505	0	0	0	0	0	0	0	0	0	0	0	0	0	0	0	0	0	0	0	0	0	0	0	0.0278063	0	0	0
HMP	SRS075984	F		North America	America		healthy			0	0	0	0	0	0	0	0	0	0	0	0	0.000120579	0.000166102	0	0	0	0	0	0	0	0	0	0	0	0	0	0	0	0	0	0	0	0	0	0	0.0256471	0	0	0
HMP	SRS076756	M		North America	America		healthy			0	0	0	0	0	0	0	0	0	0	0	0	4.25613e-05	0	0	0	0	0	0	0	0	0	0	0	0	0	0	0	0	0	0	0	0	0	0	0	0.0394801	0	0	0
HMP	SRS076804	F		North America	America		healthy			0	0	0	0	0	0	0	0	0	0	0.0104683	0	0.000638993	0	0	0	0	0	0	0	0	0	0	0	0	0	0	0	0	0	0	0	0	0	0	0	0	0	0	0
HMP	SRS076876	M		North America	America		healthy			0	0	0	0	0	0	0	0	0	0	0	0	0	0	0	0	0	0	0	0	0	0	0	0	0	0	0	0	0	0	0	0	0	0	0	0	0.0416667	0	0	0
HMP	SRS076976	M		North America	America		healthy			0	0	0	0	0	0	0	0	0	0	0	0	0.00020075	0	0	0	0	0	0	0	0	0	0	0	0	0	0	0	0	0	0	0	0	0	0	0	0.0313531	0	0	0
HMP	SRS077127	F		North America	America		healthy			0	0	0	0	0	0	0	0	0	0	0	0	0.00016665	0	0	0	0	0	0	0	0	0	0	0	0	0	0	0	0	0	0	0	0	0	0	0	0.033105	0	0	0
HMP	SRS077194	F		North America	America		healthy			0	0	0	0	0	0	0	0	0	0	0	0	0.000124939	0	0	0	0	0	0	0	0	0	0	0	0	0	0	0	0	0	0	0	0	0	0	0	0.0348445	0	0	0
HMP	SRS077231	M		North America	America		healthy			0	0	0	0	0	0	0	0	0	0	0	0	6.40287e-05	0	0	0	0	0	0	0	0	0	0	0	0	0	0	0	0	0	0	0	0	0	0	0	0.0383772	0	0	0
HMP	SRS077294	M		North America	America		healthy			0	0	0	0	0	0	0	0	0	0	0	0	0.000310807	0	0	0	0	0	0	0	0	0	0	0	0	0	0	0	0	0	0	0	0	0	0	0	0.0247047	0	0	0
HMP	SRS077335	F		North America	America		healthy			0	0	0	0	0	0	0	0	0	0	0	0	5.47839e-05	1.75908e-05	0	0	0	0	0	0	0	0	0	0	0	0	0	0	0	0	0	0	0	0	0	0	0.0351815	0	0	0
HMP	SRS077392	F		North America	America		healthy			0	0	0	0	0	0.000553907	0	0	0	0	0	0	0.000409125	9.57213e-05	0	0	0	0	0	0	0	0	0	0	0	0	0	0	0	0	6.83966e-05	0	0	0.000184636	0	0	0.00700626	0	0.00015582	0
HMP	SRS077454	M		North America	America		healthy			0	0	0	0	0	0	0	0	0	0	0	0	3.86927e-05	0	0	0	0	0	0	0	0	0	0	0	0	0	0	0	0	0	0	0	0	0	0	0	0.0385875	0	0	0
HMP	SRS077552	M		North America	America		healthy			0	0	0	0	0	0	0	0	0	0	0	0	0.000210927	0	0	0	0	0	0	0	0	0	0	0	0	0	0	0	0	0	0	0	0	0	0	0	0.030525	0	0	0
HMP	SRS077589	M		North America	America		healthy			0	0	0	0	0	0	0	0	0	0	0	0	6.14999e-05	0	0	0	0	0	0	0	0	0	0	0	0	0	0	0	0	0	0	0	0	0	0	0	0.0385071	0	0	0
HMP	SRS077641	F		North America	America		healthy			0	0	0	0	0	0	0	0	0	0	0	0	0.000499476	0	0	0	0	0	0	0	0	0	0	0	0	0	0	0	0	0	0	0	0	0	0	0	0.0160061	0	0	0
HMP	SRS077730	F		North America	America		healthy			0	0	0	0	0	0	0	0	0	0	0	0	0.00048519	0	0	0	0	0	0	0	0	0	0	0	0	0	0	0	0	0	0	0	0	0	0	0	0.0149055	0	0	0
HMP	SRS077731	F		North America	America		healthy			0	0	0	0	0	0	0	0	0	0	0	0	0.000509057	0	0	0	0	0	0	0	0	0	0	0	0	0	0	0	0	0	0	0	0	0	0	0	0.0137969	0	0	0
HMP	SRS077849	M		North America	America		healthy			0	0	0	0	0	0	0	0	0	0	0	0	0.000210267	0	0	0	0	0	0	0	0	0	0	0	0	0	0	0	0	0	0	0	0	0	0	0	0.0308642	0	0	0
HMP	SRS077991	M		North America	America		healthy			0	0	0	0	0	0	0	0	0	0	0	0	5.13652e-05	0.00078293	0	0	0	0	0	0	0	0	0	0	0	0	0	0	0	0	0	0	0	0	0	0	0.00569444	0	0	0
HMP	SRS078177	F		North America	America		healthy			0	0	0	0	0	0	0	0	0	0	0	0	0.000104119	0	0	0	0	0	0	0	0	0	0	0	0	0	0	0	0	0	0	0	0	0	0	0	0.0219595	0	0	0
[truncated: 127 more rows]
[truncated: 16 more columns]

## Sheet: c. Relative Abundance (Genus)
Batch	Sample	Gender	Lifestyle	Continent	Country	Age	Health_status	BMI	BMI1	Archaeoglobus	Methanomassiliicoccaceae DTU008	Methanomethylophilaceae ISO4-G1	Methanobacterium	Methanobrevibacter	Methanobrevibacter_A	Methanobrevibacter_B	Methanobrevibacter_C	Methanobrevibacter_D	Methanocella	Methanococcus	Methanolacinia	Methanomassiliicoccus	Methanomassiliicoccus_A	Methanomethylophilus	Methanoplasma	Methanosphaera	Altarchaeia IMC4 QMZM01	Methanomethylophilaceae RumEn-M2	Methanomethylophilaceae UBA328	Methanomethylophilaceae UBA71	Methanomethylophilaceae VadinCA11
[truncated: 1,904 more rows]
