# Supplementary material for: Metagenomic analysis reveals unexplored diversity of archaeal virome in the human gut
Source: Nat Commun. 2022 Dec 29;13:7978. doi: 10.1038/s41467-022-35735-y (PMC9800368; doi:10.1038/s41467-022-35735-y)
Supplement: Supplementary file 11 — Data 7 [file 41467_2022_35735_MOESM11_ESM.xlsx]

## Sheet: Supplementary Table9
Genome	Order	Family	Genus	VC	VC Status	Size	VC Subcluster	VC Subcluster Size	Quality	Adj P-value	Topology Confidence Score	Genera in VC	Families in VC	Orders in VC	Genus Confidence Score
Achromobacter~phage~83-24	Caudovirales	Siphoviridae	Jwxvirus	0_0	Clustered	2	VC_0_0	2	0.1858	0.952275	0.177	1	1	1	1
Achromobacter~phage~JWAlpha	Caudovirales	Podoviridae	Jwalphavirus	7_0	Clustered	20	VC_7_0	20	0.5726	1	0.5726	7	1	1	0.8316
Achromobacter~phage~JWF	Caudovirales	Siphoviridae	Unassigned	16_0	Clustered	2	VC_16_0	2	1	1	1	2	1	1	1
Achromobacter~phage~JWX	Caudovirales	Siphoviridae	Jwxvirus	0_0	Clustered	2	VC_0_0	2	0.1858	0.952275	0.177	1	1	1	1
Achromobacter~phage~phiAxp-1	Caudovirales	Siphoviridae	Unassigned	1_0	Clustered	12	VC_1_0	12	0.7025	1	0.7025	5	1	1	1
Achromobacter~phage~phiAxp-2	Caudovirales	Siphoviridae	Unassigned	19_0	Clustered	5	VC_19_0	5	0.0927	0.948135	0.0879	3	1	1	1
Achromobacter~phage~phiAxp-3	Caudovirales	Podoviridae	Jwalphavirus	7_0	Clustered	20	VC_7_0	20	0.5726	1	0.5726	7	1	1	0.8316
Acidianus~bottle-shaped~virus	Unassigned	Ampullaviridae	Ampullavirus	22_0	Clustered	3	VC_22_0	3	1	1	1	1	1	1	1
Acidianus~bottle-shaped~virus~2	Unassigned	Ampullaviridae	Ampullavirus	22_0	Clustered	3	VC_22_0	3	1	1	1	1	1	1	1
Acidianus~bottle-shaped~virus~3	Unassigned	Ampullaviridae	Ampullavirus	22_0	Clustered	3	VC_22_0	3	1	1	1	1	1	1	1
Acidianus~filamentous~virus~2	Ligamenvirales	Lipothrixviridae	Deltalipothrixvirus	25_0	Clustered	2	VC_25_0	2	0.3769	0.929484	0.3504	1	1	1	1
Acidianus~filamentous~virus~3	Ligamenvirales	Lipothrixviridae	Betalipothrixvirus	24_0	Clustered	6	VC_24_0	6	0.9299	0.999999	0.9299	1	1	1	1
Acidianus~filamentous~virus~6	Ligamenvirales	Lipothrixviridae	Betalipothrixvirus	24_0	Clustered	6	VC_24_0	6	0.9299	0.999999	0.9299	1	1	1	1
Acidianus~filamentous~virus~7	Ligamenvirales	Lipothrixviridae	Betalipothrixvirus	24_0	Clustered	6	VC_24_0	6	0.9299	0.999999	0.9299	1	1	1	1
Acidianus~filamentous~virus~8	Ligamenvirales	Lipothrixviridae	Betalipothrixvirus	24_0	Clustered	6	VC_24_0	6	0.9299	0.999999	0.9299	1	1	1	1
Acidianus~filamentous~virus~9	Ligamenvirales	Lipothrixviridae	Betalipothrixvirus	24_0	Clustered	6	VC_24_0	6	0.9299	0.999999	0.9299	1	1	1	1
Acidianus~spindle-shaped~virus~1	Unassigned	Fuselloviridae	Betafusellovirus	27_0	Clustered	9	VC_27_0	9	0.908	0.999998	0.908	2	1	1	1
Acinetobacter~phage~AB1	Caudovirales	Myoviridae	Ap22virus	35_0	Clustered	9	VC_35_0	9	0.86	1	0.86	2	1	1	1
Acinetobacter~phage~AB3	Caudovirales	Podoviridae	Fri1virus	36_0	Clustered	23	VC_36_0	23	1	1	1	4	2	1	1
Acinetobacter~phage~AM101	Caudovirales	Myoviridae	Unassigned	37_0	Clustered	10	VC_37_0	10	0.243	1	0.243	1	1	1	0.9333
Acinetobacter~phage~AP22	Caudovirales	Myoviridae	Ap22virus	35_0	Clustered	9	VC_35_0	9	0.86	1	0.86	2	1	1	1
Acinetobacter~phage~AbKT21phiIII	Caudovirales	Autographiviridae	Friunavirus	36_0	Clustered	23	VC_36_0	23	1	1	1	4	2	1	1
Acinetobacter~phage~AbP2	Caudovirales	Myoviridae	Obolenskvirus	35_0	Clustered	9	VC_35_0	9	0.86	1	0.86	2	1	1	1
Acinetobacter~phage~AbTZA1	Caudovirales	Myoviridae	Unassigned	37_0	Clustered	10	VC_37_0	10	0.243	1	0.243	1	1	1	0.9333
Acinetobacter~phage~Abp1	Caudovirales	Podoviridae	Fri1virus	36_0	Clustered	23	VC_36_0	23	1	1	1	4	2	1	1
Acinetobacter~phage~Ac42	Caudovirales	Myoviridae	Unassigned	37_4	Clustered/Singleton	1	VC_37_4	1	0	1	0	1	1	1	1
Acinetobacter~phage~Acj61	Caudovirales	Myoviridae	Unassigned	37_1	Clustered/Singleton	1	VC_37_1	1	0	1	0	1	1	1	1
Acinetobacter~phage~Acj9	Caudovirales	Myoviridae	Unassigned	37_2	Clustered/Singleton	1	VC_37_2	1	0	1	0	1	1	1	1
Acinetobacter~phage~Fri1	Caudovirales	Podoviridae	Fri1virus	36_0	Clustered	23	VC_36_0	23	1	1	1	4	2	1	1
Acinetobacter~phage~IME-AB2	Caudovirales	Myoviridae	Ap22virus	35_0	Clustered	9	VC_35_0	9	0.86	1	0.86	2	1	1	1
Acinetobacter~phage~IME200	Caudovirales	Podoviridae	Fri1virus	36_0	Clustered	23	VC_36_0	23	1	1	1	4	2	1	1
Acinetobacter~phage~IMEAB3	Caudovirales	Siphoviridae	Lokivirus	1_0	Clustered	12	VC_1_0	12	0.7025	1	0.7025	5	1	1	1
Acinetobacter~phage~KARL-1	Caudovirales	Myoviridae	Unassigned	37_0	Clustered	10	VC_37_0	10	0.243	1	0.243	1	1	1	0.9333
Acinetobacter~phage~LZ35	Caudovirales	Myoviridae	Obolenskvirus	35_0	Clustered	9	VC_35_0	9	0.86	1	0.86	2	1	1	1
Acinetobacter~phage~Loki	Caudovirales	Siphoviridae	Lokivirus	1_0	Clustered	12	VC_1_0	12	0.7025	1	0.7025	5	1	1	1
Acinetobacter~phage~Petty	Caudovirales	Autographiviridae	Pettyvirus	36_0	Clustered	23	VC_36_0	23	1	1	1	4	2	1	1
Acinetobacter~phage~SH-Ab~15519	Caudovirales	Autographiviridae	Friunavirus	36_0	Clustered	23	VC_36_0	23	1	1	1	4	2	1	1
Acinetobacter~phage~WCHABP1	Caudovirales	Myoviridae	Obolenskvirus	35_0	Clustered	9	VC_35_0	9	0.86	1	0.86	2	1	1	1
Acinetobacter~phage~WCHABP12	Caudovirales	Myoviridae	Obolenskvirus	35_0	Clustered	9	VC_35_0	9	0.86	1	0.86	2	1	1	1
Acinetobacter~phage~WCHABP5	Caudovirales	Autographiviridae	Friunavirus	36_0	Clustered	23	VC_36_0	23	1	1	1	4	2	1	1
Acinetobacter~phage~YMC-13-01-C62	Caudovirales	Myoviridae	Ap22virus	35_0	Clustered	9	VC_35_0	9	0.86	1	0.86	2	1	1	1
Acinetobacter~phage~YMC/09/02/B1251	Caudovirales	Siphoviridae	Vieuvirus	47_0	Clustered	3	VC_47_0	3	0.9158	0.981556	0.8989	1	1	1	1
Acinetobacter~phage~YMC11/11/R3177	Caudovirales	Siphoviridae	Vieuvirus	47_0	Clustered	3	VC_47_0	3	0.9158	0.981556	0.8989	1	1	1	1
Acinetobacter~phage~YMC11/12/R2315	Caudovirales	Myoviridae	Obolenskvirus	35_0	Clustered	9	VC_35_0	9	0.86	1	0.86	2	1	1	1
Acinetobacter~phage~ZZ1	Caudovirales	Myoviridae	Unassigned	37_3	Clustered/Singleton	1	VC_37_3	1	0	1	0	1	1	1	1
Acinetobacter~phage~phiAB1	Caudovirales	Podoviridae	Fri1virus	36_0	Clustered	23	VC_36_0	23	1	1	1	4	2	1	1
Acinetobacter~phage~phiAB6	Caudovirales	Autographiviridae	Friunavirus	36_0	Clustered	23	VC_36_0	23	1	1	1	4	2	1	1
Acinetobacter~phage~vB_AbaM_Acibel004	Caudovirales	Myoviridae	Saclayvirus	50_1	Clustered/Singleton	1	VC_50_1	1	0	1	0	1	1	1	1
Acinetobacter~phage~vB_AbaM_B09_Aci01-1	Caudovirales	Myoviridae	Saclayvirus	50_0	Clustered	4	VC_50_0	4	0.6182	0.99998	0.6182	1	1	1	1
Acinetobacter~phage~vB_AbaM_B09_Aci02-2	Caudovirales	Myoviridae	Saclayvirus	50_0	Clustered	4	VC_50_0	4	0.6182	0.99998	0.6182	1	1	1	1
Acinetobacter~phage~vB_AbaM_B09_Aci05	Caudovirales	Myoviridae	Saclayvirus	50_0	Clustered	4	VC_50_0	4	0.6182	0.99998	0.6182	1	1	1	1
Acinetobacter~phage~vB_AbaM_PhT2	Caudovirales	Myoviridae	Unassigned	37_0	Clustered	10	VC_37_0	10	0.243	1	0.243	1	1	1	0.9333
Acinetobacter~phage~vB_AbaM_phiAbaA1	Caudovirales	Myoviridae	Saclayvirus	50_0	Clustered	4	VC_50_0	4	0.6182	0.99998	0.6182	1	1	1	1
Acinetobacter~phage~vB_AbaP_46-62_Aci07	Caudovirales	Autographiviridae	Friunavirus	36_0	Clustered	23	VC_36_0	23	1	1	1	4	2	1	1
Acinetobacter~phage~vB_AbaP_AS11	Caudovirales	Autographiviridae	Friunavirus	36_0	Clustered	23	VC_36_0	23	1	1	1	4	2	1	1
Acinetobacter~phage~vB_AbaP_AS12	Caudovirales	Autographiviridae	Friunavirus	36_0	Clustered	23	VC_36_0	23	1	1	1	4	2	1	1
Acinetobacter~phage~vB_AbaP_Acibel007	Caudovirales	Autographiviridae	Daemvirus	36_0	Clustered	23	VC_36_0	23	1	1	1	4	2	1	1
Acinetobacter~phage~vB_AbaP_Apostate	Caudovirales	Myoviridae	Unassigned	37_0	Clustered	10	VC_37_0	10	0.243	1	0.243	1	1	1	0.9333
Acinetobacter~phage~vB_AbaP_B09_Aci08	Caudovirales	Autographiviridae	Friunavirus	36_0	Clustered	23	VC_36_0	23	1	1	1	4	2	1	1
Acinetobacter~phage~vB_AbaP_B1	Caudovirales	Autographiviridae	Friunavirus	36_0	Clustered	23	VC_36_0	23	1	1	1	4	2	1	1
Acinetobacter~phage~vB_AbaP_B3	Caudovirales	Autographiviridae	Friunavirus	36_0	Clustered	23	VC_36_0	23	1	1	1	4	2	1	1
Acinetobacter~phage~vB_AbaP_B5	Caudovirales	Autographiviridae	Friunavirus	36_0	Clustered	23	VC_36_0	23	1	1	1	4	2	1	1
Acinetobacter~phage~vB_AbaP_Berthold	Caudovirales	Myoviridae	Unassigned	37_0	Clustered	10	VC_37_0	10	0.243	1	0.243	1	1	1	0.9333
Acinetobacter~phage~vB_AbaP_D2	Caudovirales	Autographiviridae	Friunavirus	36_0	Clustered	23	VC_36_0	23	1	1	1	4	2	1	1
Acinetobacter~phage~vB_AbaP_Kimel	Caudovirales	Myoviridae	Unassigned	37_0	Clustered	10	VC_37_0	10	0.243	1	0.243	1	1	1	0.9333
Acinetobacter~phage~vB_AbaP_Konradin	Caudovirales	Myoviridae	Unassigned	37_0	Clustered	10	VC_37_0	10	0.243	1	0.243	1	1	1	0.9333
Acinetobacter~phage~vB_AbaP_Lazarus	Caudovirales	Myoviridae	Unassigned	37_0	Clustered	10	VC_37_0	10	0.243	1	0.243	1	1	1	0.9333
Acinetobacter~phage~vB_AbaP_PD-6A3	Caudovirales	Podoviridae	Fri1virus	36_0	Clustered	23	VC_36_0	23	1	1	1	4	2	1	1
Acinetobacter~phage~vB_AbaP_PD-AB9	Caudovirales	Podoviridae	Fri1virus	36_0	Clustered	23	VC_36_0	23	1	1	1	4	2	1	1
Acinetobacter~phage~vB_AbaS_TRS1	Caudovirales	Siphoviridae	Vieuvirus	47_0	Clustered	3	VC_47_0	3	0.9158	0.981556	0.8989	1	1	1	1
Acinetobacter~phage~vB_ApiM_fHyAci03	Caudovirales	Myoviridae	Unassigned	37_0	Clustered	10	VC_37_0	10	0.243	1	0.243	1	1	1	0.9333
Acinetobacter~phage~vB_ApiP_P1	Caudovirales	Autographiviridae	Friunavirus	36_0	Clustered	23	VC_36_0	23	1	1	1	4	2	1	1
Acinetobacter~phage~vB_ApiP_P2	Caudovirales	Autographiviridae	Friunavirus	36_0	Clustered	23	VC_36_0	23	1	1	1	4	2	1	1
Acinetobacter~virus~133	Caudovirales	Myoviridae	Unassigned	37_5	Clustered/Singleton	1	VC_37_5	1	0	1	0	1	1	1	1
Aeribacillus~phage~AP45	Caudovirales	Myoviridae	Unassigned	60_0	Clustered	3	VC_60_0	3	0.2654	0.990409	0.2629	1	2	1	0.6667
Aeromonas~phage~2-L372D	Caudovirales	Myoviridae	Unassigned	66_0	Clustered	2	VC_66_0	2	0.0924	0.946903	0.0875	1	1	1	1
Aeromonas~phage~25AhydR2PP	Caudovirales	Autographiviridae	Aerosvirus	75_0	Clustered	14	VC_75_0	14	0.6366	1	0.6366	8	1	1	1
Aeromonas~phage~2_L372X	Caudovirales	Myoviridae	Unassigned	66_0	Clustered	2	VC_66_0	2	0.0924	0.946903	0.0875	1	1	1	1
Aeromonas~phage~4_4572	Caudovirales	Podoviridae	Unassigned	82_0	Clustered	4	VC_82_0	4	0.4913	0.999981	0.4913	1	1	1	1
Aeromonas~phage~4_L372D	Caudovirales	Myoviridae	Unassigned	66_1	Clustered/Singleton	1	VC_66_1	1	0	1	0	1	1	1	1
Aeromonas~phage~4_L372XY	Caudovirales	Myoviridae	Unassigned	66_2	Clustered/Singleton	1	VC_66_2	1	0	1	0	1	1	1	1
Aeromonas~phage~AS-gz	Caudovirales	Myoviridae	Tulanevirus	38_1	Clustered	5	VC_38_1	5	0.0954	1	0.0954	2	1	1	1
Aeromonas~phage~Aes012	Caudovirales	Myoviridae	Secunda5virus	38_1	Clustered	5	VC_38_1	5	0.0954	1	0.0954	2	1	1	1
Aeromonas~phage~Aes508	Caudovirales	Myoviridae	Secunda5virus	38_1	Clustered	5	VC_38_1	5	0.0954	1	0.0954	2	1	1	1
Aeromonas~phage~Ahp1	Caudovirales	Autographiviridae	Ahphunavirus	75_0	Clustered	14	VC_75_0	14	0.6366	1	0.6366	8	1	1	1
Aeromonas~phage~CF7	Caudovirales	Autographiviridae	Ahphunavirus	75_0	Clustered	14	VC_75_0	14	0.6366	1	0.6366	8	1	1	1
Aeromonas~phage~LAh9	Caudovirales	Podoviridae	Unassigned	82_0	Clustered	4	VC_82_0	4	0.4913	0.999981	0.4913	1	1	1	1
Aeromonas~phage~LAh_6	Caudovirales	Podoviridae	Unassigned	82_0	Clustered	4	VC_82_0	4	0.4913	0.999981	0.4913	1	1	1	1
Aeromonas~phage~LAh_8	Caudovirales	Podoviridae	Unassigned	82_0	Clustered	4	VC_82_0	4	0.4913	0.999981	0.4913	1	1	1	1
Aeromonas~phage~PX29	Caudovirales	Myoviridae	Unassigned	40_0	Clustered	3	VC_40_0	3	0.0703	0.99857	0.0702	1	1	1	1
Aeromonas~phage~ZPAH7	Caudovirales	Autographiviridae	Aerosvirus	75_0	Clustered	14	VC_75_0	14	0.6366	1	0.6366	8	1	1	1
Aeromonas~phage~pAh6-C	Caudovirales	Chaseviridae	Pahsextavirus	95_0	Clustered	3	VC_95_0	3	0.2329	0.997498	0.2323	2	1	1	1
Aeromonas~phage~pIS4-A	Caudovirales	Siphoviridae	Pis4avirus	97_0	Clustered	5	VC_97_0	5	0.6132	1	0.6132	3	1	1	1
Aeromonas~phage~phiAS4	Caudovirales	Myoviridae	Secunda5virus	38_1	Clustered	5	VC_38_1	5	0.0954	1	0.0954	2	1	1	1
Aeromonas~phage~phiAS5	Caudovirales	Myoviridae	Unassigned	40_0	Clustered	3	VC_40_0	3	0.0703	0.99857	0.0702	1	1	1	1
Aeromonas~phage~phiAS7	Caudovirales	Autographiviridae	Aerosvirus	75_0	Clustered	14	VC_75_0	14	0.6366	1	0.6366	8	1	1	1
Aeromonas~virus~25	Caudovirales	Myoviridae	Secunda5virus	38_1	Clustered	5	VC_38_1	5	0.0954	1	0.0954	2	1	1	1
Aeromonas~virus~31	Caudovirales	Myoviridae	Secunda5virus	38_0	Clustered	2	VC_38_0	2	0.0227	0.949707	0.0216	2	1	1	1
Aeromonas~virus~44RR2	Caudovirales	Myoviridae	Biquartavirus	38_0	Clustered	2	VC_38_0	2	0.0227	0.949707	0.0216	2	1	1	1
Aeromonas~virus~Aeh1	Caudovirales	Myoviridae	Unassigned	40_0	Clustered	3	VC_40_0	3	0.0703	0.99857	0.0702	1	1	1	1
Aeromonas~virus~phiO18P	Caudovirales	Myoviridae	Hp1virus	107_0	Clustered	14	VC_107_0	14	0.8861	1	0.8861	8	1	1	1
Aggregatibacter~phage~S1249	Caudovirales	Myoviridae	Unassigned	110_0	Clustered	2	VC_110_0	2	0.4036	0.94664	0.3821	1	1	1	1
Agrobacterium~phage~7-7-1	Caudovirales	Myoviridae	Schmittlotzvirus	112_0	Clustered	3	VC_112_0	3	0.1641	0.987049	0.162	3	2	1	1
Aquamicrobium~phage~P14	Caudovirales	Autographiviridae	Aqualcavirus	76_0	Clustered	19	VC_76_0	19	0.4268	1	0.4268	14	1	1	1
Archaeal~BJ1~virus	Caudovirales	Siphoviridae	Unassigned	127_0	Clustered	2	VC_127_0	2	0.8117	0.814453	0.6611	1	2	2	1
Arthrobacter~phage~Abidatro	Caudovirales	Siphoviridae	Galaxyvirus	132_0	Clustered	6	VC_132_0	6	0.7983	1	0.7983	3	1	1	1
Arthrobacter~phage~Adat	Caudovirales	Podoviridae	Jasminevirus	141_0	Clustered	2	VC_141_0	2	1	1	1	1	1	1	1
Arthrobacter~phage~Amigo	Caudovirales	Siphoviridae	Amigovirus	142_0	Clustered	2	VC_142_0	2	0.7665	0.918133	0.7038	1	1	1	1
Arthrobacter~phage~Andrew	Caudovirales	Siphoviridae	Andrewvirus	132_0	Clustered	6	VC_132_0	6	0.7983	1	0.7983	3	1	1	1
Arthrobacter~phage~Anjali	Caudovirales	Podoviridae	Unassigned	55_0	Clustered	2	VC_55_0	2	0.7994	0.729854	0.5834	1	1	1	1
Arthrobacter~phage~BarretLemon	Caudovirales	Myoviridae	Marthavirus	129_0	Clustered	9	VC_129_0	9	0.6874	1	0.6874	1	1	1	1
Arthrobacter~phage~Beans	Caudovirales	Myoviridae	Marthavirus	129_0	Clustered	9	VC_129_0	9	0.6874	1	0.6874	1	1	1	1
Arthrobacter~phage~Bennie	Caudovirales	Siphoviridae	Korravirus	133_0	Clustered	9	VC_133_0	9	0.8502	1	0.8502	1	1	1	1
Arthrobacter~phage~Brent	Caudovirales	Myoviridae	Marthavirus	129_0	Clustered	9	VC_129_0	9	0.6874	1	0.6874	1	1	1	1
Arthrobacter~phage~Bridgette	Caudovirales	Siphoviridae	Bridgettevirus	146_0	Clustered	5	VC_146_0	5	0.9851	0.999776	0.9849	1	1	1	1
Arthrobacter~phage~Colucci	Caudovirales	Myoviridae	Radnorvirus	130_0	Clustered	6	VC_130_0	6	0.6108	1	0.6108	2	1	1	1
Arthrobacter~phage~Constance	Caudovirales	Siphoviridae	Bridgettevirus	146_0	Clustered	5	VC_146_0	5	0.9851	0.999776	0.9849	1	1	1	1
Arthrobacter~phage~Coral	Caudovirales	Siphoviridae	Coralvirus	132_0	Clustered	6	VC_132_0	6	0.7983	1	0.7983	3	1	1	1
Arthrobacter~phage~DrManhattan	Caudovirales	Siphoviridae	Manhattanvirus	145_0	Clustered	4	VC_145_0	4	0.5972	0.999976	0.5972	4	1	1	1
Arthrobacter~phage~DrRobert	Caudovirales	Siphoviridae	Korravirus	133_0	Clustered	9	VC_133_0	9	0.8502	1	0.8502	1	1	1	1
Arthrobacter~phage~DrYang	Caudovirales	Myoviridae	Radnorvirus	130_0	Clustered	6	VC_130_0	6	0.6108	1	0.6108	2	1	1	1
Arthrobacter~phage~Eileen	Caudovirales	Siphoviridae	Bridgettevirus	146_0	Clustered	5	VC_146_0	5	0.9851	0.999776	0.9849	1	1	1	1
Arthrobacter~phage~Galaxy	Caudovirales	Siphoviridae	Galaxyvirus	132_0	Clustered	6	VC_132_0	6	0.7983	1	0.7983	3	1	1	1
Arthrobacter~phage~Glenn	Caudovirales	Siphoviridae	Korravirus	133_0	Clustered	9	VC_133_0	9	0.8502	1	0.8502	1	1	1	1
Arthrobacter~phage~HunterDalle	Caudovirales	Siphoviridae	Korravirus	133_0	Clustered	9	VC_133_0	9	0.8502	1	0.8502	1	1	1	1
Arthrobacter~phage~Jasmine	Caudovirales	Podoviridae	Jasminevirus	141_0	Clustered	2	VC_141_0	2	1	1	1	1	1	1	1
Arthrobacter~phage~Jawnski	Caudovirales	Myoviridae	Marthavirus	129_0	Clustered	9	VC_129_0	9	0.6874	1	0.6874	1	1	1	1
Arthrobacter~phage~Joann	Caudovirales	Siphoviridae	Korravirus	133_0	Clustered	9	VC_133_0	9	0.8502	1	0.8502	1	1	1	1
Arthrobacter~phage~Judy	Caudovirales	Siphoviridae	Bridgettevirus	146_0	Clustered	5	VC_146_0	5	0.9851	0.999776	0.9849	1	1	1	1
Arthrobacter~phage~KBurrousTX	Caudovirales	Myoviridae	Radnorvirus	130_0	Clustered	6	VC_130_0	6	0.6108	1	0.6108	2	1	1	1
Arthrobacter~phage~KellEzio	Caudovirales	Siphoviridae	Kelleziovirus	156_0	Clustered	2	VC_156_0	2	1	1	1	1	1	1	1
Arthrobacter~phage~Kepler	Caudovirales	Siphoviridae	Coralvirus	132_0	Clustered	6	VC_132_0	6	0.7983	1	0.7983	3	1	1	1
Arthrobacter~phage~Kitkat	Caudovirales	Siphoviridae	Kelleziovirus	156_0	Clustered	2	VC_156_0	2	1	1	1	1	1	1	1
Arthrobacter~phage~Korra	Caudovirales	Siphoviridae	Korravirus	133_0	Clustered	9	VC_133_0	9	0.8502	1	0.8502	1	1	1	1
Arthrobacter~phage~Kuleana	Caudovirales	Siphoviridae	Coralvirus	132_0	Clustered	6	VC_132_0	6	0.7983	1	0.7983	3	1	1	1
Arthrobacter~phage~Liebe	Caudovirales	Siphoviridae	Liebevirus	145_0	Clustered	4	VC_145_0	4	0.5972	0.999976	0.5972	4	1	1	1
Arthrobacter~phage~Lymara	Caudovirales	Myoviridae	Radnorvirus	130_0	Clustered	6	VC_130_0	6	0.6108	1	0.6108	2	1	1	1
Arthrobacter~phage~Maja	Caudovirales	Siphoviridae	Majavirus	134_0	Clustered	2	VC_134_0	2	0.0691	0.676106	0.0467	2	1	1	1
Arthrobacter~phage~Martha	Caudovirales	Myoviridae	Marthavirus	129_0	Clustered	9	VC_129_0	9	0.6874	1	0.6874	1	1	1	1
Arthrobacter~phage~Mendel	Caudovirales	Podoviridae	Unassigned	55_0	Clustered	2	VC_55_0	2	0.7994	0.729854	0.5834	1	1	1	1
Arthrobacter~phage~Molivia	Caudovirales	Siphoviridae	Amigovirus	142_0	Clustered	2	VC_142_0	2	0.7665	0.918133	0.7038	1	1	1	1
Arthrobacter~phage~Mufasa8	Caudovirales	Siphoviridae	Unassigned	131_0	Clustered	2	VC_131_0	2	0.6817	0.942872	0.6428	2	1	1	1
Arthrobacter~phage~Peas	Caudovirales	Siphoviridae	Bridgettevirus	146_0	Clustered	5	VC_146_0	5	0.9851	0.999776	0.9849	1	1	1	1
Arthrobacter~phage~Piccoletto	Caudovirales	Myoviridae	Marthavirus	129_0	Clustered	9	VC_129_0	9	0.6874	1	0.6874	1	1	1	1
Arthrobacter~phage~Preamble	Caudovirales	Siphoviridae	Korravirus	133_0	Clustered	9	VC_133_0	9	0.8502	1	0.8502	1	1	1	1
Arthrobacter~phage~PrincessTrina	Caudovirales	Myoviridae	Arv1virus	130_0	Clustered	6	VC_130_0	6	0.6108	1	0.6108	2	1	1	1
Arthrobacter~phage~Pumancara	Caudovirales	Siphoviridae	Korravirus	133_0	Clustered	9	VC_133_0	9	0.8502	1	0.8502	1	1	1	1
Arthrobacter~phage~Shade	Caudovirales	Myoviridae	Marthavirus	129_0	Clustered	9	VC_129_0	9	0.6874	1	0.6874	1	1	1	1
Arthrobacter~phage~Sonali	Caudovirales	Siphoviridae	Sonalivirus	131_0	Clustered	2	VC_131_0	2	0.6817	0.942872	0.6428	2	1	1	1
Arthrobacter~phage~Sonny	Caudovirales	Myoviridae	Marthavirus	129_0	Clustered	9	VC_129_0	9	0.6874	1	0.6874	1	1	1	1
Arthrobacter~phage~TripleJ	Caudovirales	Siphoviridae	Unassigned	143_0	Clustered	2	VC_143_0	2	0.1369	0.949608	0.13	2	1	1	1
Arthrobacter~phage~Wayne	Caudovirales	Siphoviridae	Korravirus	133_0	Clustered	9	VC_133_0	9	0.8502	1	0.8502	1	1	1	1
Arthrobacter~phage~Yang	Caudovirales	Siphoviridae	Yangvirus	145_0	Clustered	4	VC_145_0	4	0.5972	0.999976	0.5972	4	1	1	1
Arthrobacter~phage~Zartrosa	Caudovirales	Myoviridae	Marthavirus	129_0	Clustered	9	VC_129_0	9	0.6874	1	0.6874	1	1	1	1
Arthrobacter~phage~vB_ArS-ArV2	Caudovirales	Siphoviridae	Unassigned	134_0	Clustered	2	VC_134_0	2	0.0691	0.676106	0.0467	2	1	1	1
Arthrobacter~phage~vB_ArtM-ArV1	Caudovirales	Myoviridae	Arv1virus	130_0	Clustered	6	VC_130_0	6	0.6108	1	0.6108	2	1	1	1
Bacillus~phage~AR9	Caudovirales	Myoviridae	Unassigned	164_0	Clustered	2	VC_164_0	2	0.7241	0.729854	0.5285	1	1	1	1
Bacillus~phage~Aurora	Caudovirales	Podoviridae	Unassigned	165_0	Clustered	4	VC_165_0	4	0.6742	0.999895	0.6741	1	1	1	1
Bacillus~phage~BCD7	Caudovirales	Myoviridae	Unassigned	174_0	Clustered	2	VC_174_0	2	0.7074	0.814453	0.5762	1	1	1	1
Bacillus~phage~BCP78	Caudovirales	Myoviridae	Tsarbombavirus	167_0	Clustered	3	VC_167_0	3	0.0509	0.99848	0.0509	1	1	1	1
Bacillus~phage~BCP8-2	Caudovirales	Myoviridae	Bc431virus	167_4	Clustered	2	VC_167_4	2	0.0251	0.945105	0.0237	1	1	1	1
Bacillus~phage~BCU4	Caudovirales	Myoviridae	Tsarbombavirus	167_0	Clustered	3	VC_167_0	3	0.0509	0.99848	0.0509	1	1	1	1
Bacillus~phage~BPS10C	Caudovirales	Herelleviridae	Wphvirus	168_1	Clustered	4	VC_168_1	4	0.0697	0.999276	0.0697	1	2	1	1
Bacillus~phage~BPS13	Caudovirales	Myoviridae	Wphvirus	168_1	Clustered	4	VC_168_1	4	0.0697	0.999276	0.0697	1	2	1	1
Bacillus~phage~BSP38	Caudovirales	Herelleviridae	Nitunavirus	167_3	Clustered	2	VC_167_3	2	0.0289	0.952673	0.0276	1	1	1	1
Bacillus~phage~BalMu-1	Caudovirales	Myoviridae	Unassigned	185_0	Clustered	2	VC_185_0	2	0.0481	0.86925	0.0418	2	1	1	1
Bacillus~phage~Bam35c	Kalamavirales	Tectiviridae	Betatectivirus	187_0	Clustered	4	VC_187_0	4	1	1	1	1	1	1	1
Bacillus~phage~Bcp1	Caudovirales	Myoviridae	Bc431virus	167_5	Clustered	4	VC_167_5	4	0.0781	0.999974	0.0781	1	1	1	0.8333
Bacillus~phage~Belinda	Caudovirales	Herelleviridae	Wphvirus	168_0	Clustered	12	VC_168_0	12	0.3119	1	0.3119	1	2	1	1
Bacillus~phage~Bobb	Caudovirales	Myoviridae	Agatevirus	167_6	Clustered	3	VC_167_6	3	0.0645	0.99832	0.0644	1	1	1	1
Bacillus~phage~Bp8p-C	Caudovirales	Myoviridae	Agatevirus	167_6	Clustered	3	VC_167_6	3	0.0645	0.99832	0.0644	1	1	1	1
Bacillus~phage~Bp8p-T	Caudovirales	Myoviridae	Agatevirus	167_6	Clustered	3	VC_167_6	3	0.0645	0.99832	0.0644	1	1	1	1
Bacillus~phage~CampHawk	Caudovirales	Myoviridae	Spo1virus	169_0	Clustered	2	VC_169_0	2	0.2406	0.95468	0.2297	1	1	1	1
Bacillus~phage~Carmen17	Caudovirales	Siphoviridae	Unassigned	197_0	Clustered	2	VC_197_0	2	0.2518	0.953301	0.24	1	1	1	1
Bacillus~phage~Claudi	Caudovirales	Podoviridae	Unassigned	165_0	Clustered	4	VC_165_0	4	0.6742	0.999895	0.6741	1	1	1	1
Bacillus~phage~DIGNKC	Caudovirales	Herelleviridae	Wphvirus	168_0	Clustered	12	VC_168_0	12	0.3119	1	0.3119	1	2	1	1
Bacillus~phage~Deep~Blue	Caudovirales	Myoviridae	Bc431virus	167_5	Clustered	4	VC_167_5	4	0.0781	0.999974	0.0781	1	1	1	0.8333
Bacillus~phage~DirtyBetty	Caudovirales	Herelleviridae	Wphvirus	168_0	Clustered	12	VC_168_0	12	0.3119	1	0.3119	1	2	1	1
Bacillus~phage~Eldridge	Caudovirales	Herelleviridae	Unassigned	167_8	Clustered	2	VC_167_8	2	0.0304	0.956304	0.029	1	1	1	1
Bacillus~phage~Eyuki	Caudovirales	Myoviridae	Wphvirus	168_0	Clustered	12	VC_168_0	12	0.3119	1	0.3119	1	2	1	1
Bacillus~phage~Fah	Caudovirales	Siphoviridae	Wbetavirus	189_0	Clustered	3	VC_189_0	3	0.3607	0.998162	0.36	1	1	1	1
Bacillus~phage~GIL16c	Kalamavirales	Tectiviridae	Betatectivirus	187_0	Clustered	4	VC_187_0	4	1	1	1	1	1	1	1
Bacillus~phage~Gamma	Caudovirales	Siphoviridae	Wbetavirus	189_0	Clustered	3	VC_189_0	3	0.3607	0.998162	0.36	1	1	1	1
Bacillus~phage~Grass	Caudovirales	Myoviridae	Nit1virus	167_2	Clustered	2	VC_167_2	2	0.0302	0.951539	0.0287	1	1	1	1
Bacillus~phage~Hakuna	Caudovirales	Myoviridae	Wphvirus	168_0	Clustered	12	VC_168_0	12	0.3119	1	0.3119	1	2	1	1
Bacillus~phage~JBP901	Caudovirales	Myoviridae	Bc431virus	167_4	Clustered	2	VC_167_4	2	0.0251	0.945105	0.0237	1	1	1	1
Bacillus~phage~Kida	Caudovirales	Herelleviridae	Wphvirus	168_0	Clustered	12	VC_168_0	12	0.3119	1	0.3119	1	2	1	1
Bacillus~phage~MG-B1	Caudovirales	Podoviridae	Unassigned	165_0	Clustered	4	VC_165_0	4	0.6742	0.999895	0.6741	1	1	1	1
Bacillus~phage~Mater	Caudovirales	Herelleviridae	Unassigned	167_9	Clustered/Singleton	1	VC_167_9	1	0	1	0	1	1	1	1
Bacillus~phage~Megatron	Caudovirales	Myoviridae	Wphvirus	168_0	Clustered	12	VC_168_0	12	0.3119	1	0.3119	1	2	1	1
Bacillus~phage~Mgbh1	Caudovirales	Siphoviridae	Magadivirus	206_0	Clustered	2	VC_206_0	2	0.6397	0.855578	0.5473	2	1	1	1
Bacillus~phage~Moonbeam	Caudovirales	Herelleviridae	Unassigned	167_8	Clustered	2	VC_167_8	2	0.0304	0.956304	0.029	1	1	1	1
Bacillus~phage~Nemo	Caudovirales	Herelleviridae	Wphvirus	168_0	Clustered	12	VC_168_0	12	0.3119	1	0.3119	1	2	1	1
Bacillus~phage~Nigalana	Caudovirales	Herelleviridae	Wphvirus	168_0	Clustered	12	VC_168_0	12	0.3119	1	0.3119	1	2	1	1
Bacillus~phage~NotTheCreek	Caudovirales	Herelleviridae	Wphvirus	168_0	Clustered	12	VC_168_0	12	0.3119	1	0.3119	1	2	1	1
Bacillus~phage~PBC1	Caudovirales	Siphoviridae	Unassigned	197_0	Clustered	2	VC_197_0	2	0.2518	0.953301	0.24	1	1	1	1
Bacillus~phage~PM1	Caudovirales	Siphoviridae	Saundersvirus	208_0	Clustered	3	VC_208_0	3	0.2976	0.958919	0.2854	3	1	1	0.6667
Bacillus~phage~Page	Caudovirales	Podoviridae	Pagevirus	62_0	Clustered	6	VC_62_0	6	0.9817	0.999996	0.9817	1	1	1	1
Bacillus~phage~Palmer	Caudovirales	Podoviridae	Pagevirus	62_0	Clustered	6	VC_62_0	6	0.9817	0.999996	0.9817	1	1	1	1
Bacillus~phage~Pascal	Caudovirales	Podoviridae	Pagevirus	62_0	Clustered	6	VC_62_0	6	0.9817	0.999996	0.9817	1	1	1	1
Bacillus~phage~Pavlov	Caudovirales	Podoviridae	Pagevirus	62_0	Clustered	6	VC_62_0	6	0.9817	0.999996	0.9817	1	1	1	1
Bacillus~phage~PfEFR-4	Caudovirales	Siphoviridae	Unassigned	190_0	Clustered	3	VC_190_0	3	0.2619	0.998449	0.2614	1	1	1	1
Bacillus~phage~PfEFR-5	Caudovirales	Siphoviridae	Unassigned	190_0	Clustered	3	VC_190_0	3	0.2619	0.998449	0.2614	1	1	1	1
Bacillus~phage~Pony	Caudovirales	Podoviridae	Pagevirus	62_0	Clustered	6	VC_62_0	6	0.9817	0.999996	0.9817	1	1	1	1
Bacillus~phage~Pookie	Caudovirales	Podoviridae	Pagevirus	62_0	Clustered	6	VC_62_0	6	0.9817	0.999996	0.9817	1	1	1	1
Bacillus~phage~SIOphi	Caudovirales	Herelleviridae	Unassigned	167_11	Clustered/Singleton	1	VC_167_11	1	0	1	0	1	1	1	1
Bacillus~phage~SageFayge	Caudovirales	Herelleviridae	Wphvirus	168_0	Clustered	12	VC_168_0	12	0.3119	1	0.3119	1	2	1	1
Bacillus~phage~SalinJah	Caudovirales	Herelleviridae	Wphvirus	168_1	Clustered	4	VC_168_1	4	0.0697	0.999276	0.0697	1	2	1	1
Bacillus~phage~Shbh1	Caudovirales	Myoviridae	Shalavirus	167_1	Clustered/Singleton	1	VC_167_1	1	0	1	0	1	1	1	1
Bacillus~phage~Slash	Caudovirales	Siphoviridae	Slashvirus	205_0	Clustered	4	VC_205_0	4	0.9978	0.966623	0.9645	1	1	1	1
Bacillus~phage~Stahl	Caudovirales	Siphoviridae	Slashvirus	205_0	Clustered	4	VC_205_0	4	0.9978	0.966623	0.9645	1	1	1	1
Bacillus~phage~Staley	Caudovirales	Siphoviridae	Slashvirus	205_0	Clustered	4	VC_205_0	4	0.9978	0.966623	0.9645	1	1	1	1
Bacillus~phage~Stills	Caudovirales	Siphoviridae	Slashvirus	205_0	Clustered	4	VC_205_0	4	0.9978	0.966623	0.9645	1	1	1	1
Bacillus~phage~Stitch	Caudovirales	Podoviridae	Unassigned	165_0	Clustered	4	VC_165_0	4	0.6742	0.999895	0.6741	1	1	1	1
Bacillus~phage~TP21-L	Caudovirales	Siphoviridae	Tp21virus	191_0	Clustered	2	VC_191_0	2	0.7807	0.879217	0.6864	1	1	1	1
Bacillus~phage~TsarBomba	Caudovirales	Myoviridae	Tsarbombavirus	167_0	Clustered	3	VC_167_0	3	0.0509	0.99848	0.0509	1	1	1	1
Bacillus~phage~W.Ph.	Caudovirales	Myoviridae	Wphvirus	168_1	Clustered	4	VC_168_1	4	0.0697	0.999276	0.0697	1	2	1	1
Bacillus~phage~Wip1	Kalamavirales	Tectiviridae	Betatectivirus	187_0	Clustered	4	VC_187_0	4	1	1	1	1	1	1	1
Bacillus~phage~Zuko	Caudovirales	Herelleviridae	Wphvirus	168_0	Clustered	12	VC_168_0	12	0.3119	1	0.3119	1	2	1	1
Bacillus~phage~phiAGATE	Caudovirales	Myoviridae	Agatevirus	167_7	Clustered/Singleton	1	VC_167_7	1	0	1	0	1	1	1	1
Bacillus~phage~phiNIT1	Caudovirales	Myoviridae	Nit1virus	167_2	Clustered	2	VC_167_2	2	0.0302	0.951539	0.0287	1	1	1	1
Bacillus~phage~vB_BanS-Tsamsa	Caudovirales	Siphoviridae	Unassigned	170_3	Clustered/Singleton	1	VC_170_3	1	0	1	0	1	1	1	1
Bacillus~phage~vB_BceM_Bc431v3	Caudovirales	Myoviridae	Bc431virus	167_5	Clustered	4	VC_167_5	4	0.0781	0.999974	0.0781	1	1	1	0.8333
Bacillus~phage~vB_BceS-MY192	Caudovirales	Siphoviridae	Unassigned	190_0	Clustered	3	VC_190_0	3	0.2619	0.998449	0.2614	1	1	1	1
Bacillus~phage~vB_BmeM-Goe8	Caudovirales	Herelleviridae	Unassigned	167_10	Clustered/Singleton	1	VC_167_10	1	0	1	0	1	1	1	1
Bacillus~phage~vB_BsuM-Goe3	Caudovirales	Herelleviridae	Nitunavirus	167_3	Clustered	2	VC_167_3	2	0.0289	0.952673	0.0276	1	1	1	1
Bacillus~phage~vB_BtS_B83	Caudovirales	Siphoviridae	Unassigned	192_0	Clustered	2	VC_192_0	2	0.5413	0.946255	0.5122	1	1	1	1
Bacillus~phage~vB_BtS_BMBtp14	Caudovirales	Siphoviridae	Unassigned	192_0	Clustered	2	VC_192_0	2	0.5413	0.946255	0.5122	1	1	1	1
Bacillus~virus~1	Caudovirales	Myoviridae	Svunavirus	120_0	Clustered	2	VC_120_0	2	0.4522	0.94551	0.4276	1	1	1	1
Bacillus~virus~AP50	Kalamavirales	Tectiviridae	Betatectivirus	187_0	Clustered	4	VC_187_0	4	1	1	1	1	1	1	1
Bacillus~virus~Andromeda	Caudovirales	Siphoviridae	Andromedavirus	215_0	Clustered	8	VC_215_0	8	1	1	1	1	1	1	1
Bacillus~virus~BM15	Caudovirales	Myoviridae	Bc431virus	167_5	Clustered	4	VC_167_5	4	0.0781	0.999974	0.0781	1	1	1	0.8333
Bacillus~virus~BMBtp2	Caudovirales	Siphoviridae	Tp21virus	191_0	Clustered	2	VC_191_0	2	0.7807	0.879217	0.6864	1	1	1	1
Bacillus~virus~Blastoid	Caudovirales	Siphoviridae	Andromedavirus	215_0	Clustered	8	VC_215_0	8	1	1	1	1	1	1	1
Bacillus~virus~Curly	Caudovirales	Siphoviridae	Andromedavirus	215_0	Clustered	8	VC_215_0	8	1	1	1	1	1	1	1
Bacillus~virus~Eoghan	Caudovirales	Siphoviridae	Andromedavirus	215_0	Clustered	8	VC_215_0	8	1	1	1	1	1	1	1
Bacillus~virus~Finn	Caudovirales	Siphoviridae	Andromedavirus	215_0	Clustered	8	VC_215_0	8	1	1	1	1	1	1	1
Bacillus~virus~Glittering	Caudovirales	Siphoviridae	Andromedavirus	215_0	Clustered	8	VC_215_0	8	1	1	1	1	1	1	1
Bacillus~virus~PBS1	Caudovirales	Myoviridae	Unassigned	164_0	Clustered	2	VC_164_0	2	0.7241	0.729854	0.5285	1	1	1	1
Bacillus~virus~Riggi	Caudovirales	Siphoviridae	Andromedavirus	215_0	Clustered	8	VC_215_0	8	1	1	1	1	1	1	1
Bacillus~virus~SPO1	Caudovirales	Myoviridae	Spo1virus	169_0	Clustered	2	VC_169_0	2	0.2406	0.95468	0.2297	1	1	1	1
Bacillus~virus~SPbeta	Caudovirales	Siphoviridae	Spbetavirus	170_0	Clustered/Singleton	1	VC_170_0	1	0	1	0	1	1	1	1
Bacillus~virus~Taylor	Caudovirales	Siphoviridae	Andromedavirus	215_0	Clustered	8	VC_215_0	8	1	1	1	1	1	1	1
Bacillus~virus~Wbeta	Caudovirales	Siphoviridae	Wbetavirus	189_0	Clustered	3	VC_189_0	3	0.3607	0.998162	0.36	1	1	1	1
Bacteriophage~APSE-2	Caudovirales	Podoviridae	Unassigned	218_0	Clustered	2	VC_218_0	2	0.1197	0.952993	0.1141	1	1	1	1
Bacteriophage~sp.	Unassigned	Unassigned	Unassigned	18_0	Clustered	20	VC_18_0	20	0.8567	1	0.8567	2	2	2	1
Bacteroides~phage~B124-14	Caudovirales	Siphoviridae	Unassigned	200_0	Clustered	2	VC_200_0	2	0.4711	0.945404	0.4454	1	1	1	1
Bacteroides~phage~B40-8	Caudovirales	Siphoviridae	Unassigned	200_0	Clustered	2	VC_200_0	2	0.4711	0.945404	0.4454	1	1	1	1
Bdellovibrio~phage~phiMH2K	Petitvirales	Microviridae	Bdellomicrovirus	225_0	Clustered	5	VC_225_0	5	0.7953	0.999912	0.7952	2	1	1	1
Bifidobacterium~phage~BadAargau2	Caudovirales	Podoviridae	Unassigned	57_0	Clustered	2	VC_57_0	2	0.8437	0.76025	0.6414	1	1	1	1
Bifidobacterium~phage~BadAztec1	Caudovirales	Podoviridae	Unassigned	57_0	Clustered	2	VC_57_0	2	0.8437	0.76025	0.6414	1	1	1	1
Bordetella~virus~BPP1	Caudovirales	Podoviridae	Bpp1virus	228_0	Clustered	3	VC_228_0	3	0.1461	0.935853	0.1367	2	1	1	1
Brevibacillus~phage~Abouo	Caudovirales	Myoviridae	Abouovirus	193_0	Clustered	5	VC_193_0	5	0.7807	1	0.7807	2	1	1	1
Brevibacillus~phage~Davies	Caudovirales	Myoviridae	Abouovirus	193_0	Clustered	5	VC_193_0	5	0.7807	1	0.7807	2	1	1	1
Brevibacillus~phage~Jimmer1	Caudovirales	Myoviridae	Jimmervirus	193_0	Clustered	5	VC_193_0	5	0.7807	1	0.7807	2	1	1	1
Brevibacillus~phage~Jimmer2	Caudovirales	Myoviridae	Jimmervirus	193_0	Clustered	5	VC_193_0	5	0.7807	1	0.7807	2	1	1	1
Brevibacillus~phage~Osiris	Caudovirales	Myoviridae	Jimmervirus	193_0	Clustered	5	VC_193_0	5	0.7807	1	0.7807	2	1	1	1
Brevibacillus~phage~Sundance	Caudovirales	Siphoviridae	Unassigned	170_4	Clustered/Singleton	1	VC_170_4	1	0	1	0	1	1	1	1
Brevibacterium~phage~LuckyBarnes	Caudovirales	Siphoviridae	Luckybarnesvirus	143_0	Clustered	2	VC_143_0	2	0.1369	0.949608	0.13	2	1	1	1
Brucella~phage~BiPBO1	Caudovirales	Siphoviridae	Unassigned	234_0	Clustered	2	VC_234_0	2	0.884	0.5	0.442	1	1	1	1
Brucella~phage~Pr	Caudovirales	Podoviridae	Prtbvirus	235_0	Clustered	2	VC_235_0	2	0.839	0.933768	0.7834	1	1	1	1
Brucella~phage~Tb	Caudovirales	Podoviridae	Prtbvirus	235_0	Clustered	2	VC_235_0	2	0.839	0.933768	0.7834	1	1	1	1
Burkholderia~phage~Bcep176	Caudovirales	Siphoviridae	Stanholtvirus	238_0	Clustered	5	VC_238_0	5	0.4736	1	0.4736	2	1	1	1
Burkholderia~phage~BcepB1A	Caudovirales	Myoviridae	Unassigned	243_0	Clustered	2	VC_243_0	2	0.0206	0.954535	0.0196	1	1	1	1
Burkholderia~phage~BcepNazgul	Caudovirales	Siphoviridae	Nazgulvirus	19_0	Clustered	5	VC_19_0	5	0.0927	0.948135	0.0879	3	1	1	1
Burkholderia~phage~Bp-AMP1	Caudovirales	Autographiviridae	Ampunavirus	76_0	Clustered	19	VC_76_0	19	0.4268	1	0.4268	14	1	1	1
Burkholderia~phage~JG068	Caudovirales	Autographiviridae	Mguuvirus	76_0	Clustered	19	VC_76_0	19	0.4268	1	0.4268	14	1	1	1
Burkholderia~phage~KL3	Caudovirales	Myoviridae	Tigrvirus	108_0	Clustered	44	VC_108_0	44	0.8526	1	0.8526	14	1	1	1
Burkholderia~phage~KS14	Caudovirales	Myoviridae	Kisquattuordecimvirus	108_0	Clustered	44	VC_108_0	44	0.8526	1	0.8526	14	1	1	1
Burkholderia~phage~KS5	Caudovirales	Myoviridae	Kisquinquevirus	108_0	Clustered	44	VC_108_0	44	0.8526	1	0.8526	14	1	1	1
Burkholderia~phage~KS9	Caudovirales	Siphoviridae	Stanholtvirus	238_0	Clustered	5	VC_238_0	5	0.4736	1	0.4736	2	1	1	1
Burkholderia~phage~ST79	Caudovirales	Myoviridae	Nampongvirus	108_0	Clustered	44	VC_108_0	44	0.8526	1	0.8526	14	1	1	1
Burkholderia~phage~vB_BceM_AP3	Caudovirales	Myoviridae	Peduovirus	108_0	Clustered	44	VC_108_0	44	0.8526	1	0.8526	14	1	1	1
Burkholderia~phage~vB_BceS_AH2	Caudovirales	Siphoviridae	Ahduovirus	19_0	Clustered	5	VC_19_0	5	0.0927	0.948135	0.0879	3	1	1	1
Burkholderia~phage~vB_BceS_KL1	Caudovirales	Siphoviridae	Septima3virus	1_0	Clustered	12	VC_1_0	12	0.7025	1	0.7025	5	1	1	1
Burkholderia~virus~Bcep1	Caudovirales	Myoviridae	Bcep78virus	106_0	Clustered	4	VC_106_0	4	0.769	0.999558	0.7687	1	1	1	1
Burkholderia~virus~Bcep22	Caudovirales	Podoviridae	Bcep22virus	252_0	Clustered	4	VC_252_0	4	0.6549	0.99997	0.6548	1	1	1	1
Burkholderia~virus~Bcep43	Caudovirales	Myoviridae	Bcep78virus	106_0	Clustered	4	VC_106_0	4	0.769	0.999558	0.7687	1	1	1	1
Burkholderia~virus~Bcep781	Caudovirales	Myoviridae	Bcep78virus	106_0	Clustered	4	VC_106_0	4	0.769	0.999558	0.7687	1	1	1	1
Burkholderia~virus~BcepF1	Caudovirales	Myoviridae	Pbunavirus	242_0	Clustered	6	VC_242_0	6	0.0848	0.64002	0.0543	4	1	1	0.8667
Burkholderia~virus~BcepNY3	Caudovirales	Myoviridae	Bcep78virus	106_0	Clustered	4	VC_106_0	4	0.769	0.999558	0.7687	1	1	1	1
Burkholderia~virus~Bcepil02	Caudovirales	Podoviridae	Bcep22virus	252_0	Clustered	4	VC_252_0	4	0.6549	0.99997	0.6548	1	1	1	1
Burkholderia~virus~Bcepmigl	Caudovirales	Podoviridae	Bcep22virus	252_0	Clustered	4	VC_252_0	4	0.6549	0.99997	0.6548	1	1	1	1
Burkholderia~virus~DC1	Caudovirales	Podoviridae	Bcep22virus	252_0	Clustered	4	VC_252_0	4	0.6549	0.99997	0.6548	1	1	1	1
Burkholderia~virus~phi1026b	Caudovirales	Siphoviridae	E125virus	238_0	Clustered	5	VC_238_0	5	0.4736	1	0.4736	2	1	1	1
Burkholderia~virus~phi52237	Caudovirales	Myoviridae	P2virus	108_0	Clustered	44	VC_108_0	44	0.8526	1	0.8526	14	1	1	1
Burkholderia~virus~phi6442	Caudovirales	Siphoviridae	E125virus	238_0	Clustered	5	VC_238_0	5	0.4736	1	0.4736	2	1	1	1
Burkholderia~virus~phiE122	Caudovirales	Myoviridae	P2virus	108_0	Clustered	44	VC_108_0	44	0.8526	1	0.8526	14	1	1	1
Burkholderia~virus~phiE125	Caudovirales	Siphoviridae	E125virus	238_0	Clustered	5	VC_238_0	5	0.4736	1	0.4736	2	1	1	1
Burkholderia~virus~phiE202	Caudovirales	Myoviridae	P2virus	108_0	Clustered	44	VC_108_0	44	0.8526	1	0.8526	14	1	1	1
Campylobacter~phage~CP30A	Caudovirales	Myoviridae	Cp8virus	258_0	Clustered	6	VC_258_0	6	0.856	1	0.856	2	1	1	1
Campylobacter~phage~PC14	Caudovirales	Myoviridae	Fletchervirus	258_0	Clustered	6	VC_258_0	6	0.856	1	0.856	2	1	1	1
Campylobacter~phage~vB_CjeM_Los1	Caudovirales	Myoviridae	Fletchervirus	258_0	Clustered	6	VC_258_0	6	0.856	1	0.856	2	1	1	1
Campylobacter~virus~CP21	Caudovirales	Myoviridae	Cp220virus	259_0	Clustered	4	VC_259_0	4	0.7039	0.999901	0.7038	1	1	1	1
Campylobacter~virus~CP220	Caudovirales	Myoviridae	Cp220virus	259_0	Clustered	4	VC_259_0	4	0.7039	0.999901	0.7038	1	1	1	1
Campylobacter~virus~CP81	Caudovirales	Myoviridae	Cp8virus	258_0	Clustered	6	VC_258_0	6	0.856	1	0.856	2	1	1	1
Campylobacter~virus~CPX	Caudovirales	Myoviridae	Cp8virus	258_0	Clustered	6	VC_258_0	6	0.856	1	0.856	2	1	1	1
Campylobacter~virus~CPt10	Caudovirales	Myoviridae	Cp220virus	259_0	Clustered	4	VC_259_0	4	0.7039	0.999901	0.7038	1	1	1	1
Campylobacter~virus~IBB35	Caudovirales	Myoviridae	Cp220virus	259_0	Clustered	4	VC_259_0	4	0.7039	0.999901	0.7038	1	1	1	1
Campylobacter~virus~NCTC12673	Caudovirales	Myoviridae	Cp8virus	258_0	Clustered	6	VC_258_0	6	0.856	1	0.856	2	1	1	1
Caulobacter~phage~CcrBL10	Caudovirales	Siphoviridae	Poindextervirus	116_2	Clustered	2	VC_116_2	2	0.0822	0.827899	0.068	2	1	1	1
Caulobacter~phage~CcrBL9	Caudovirales	Siphoviridae	Bertelyvirus	116_0	Clustered	2	VC_116_0	2	0.1723	0.941661	0.1623	1	1	1	1
Caulobacter~phage~CcrColossus	Caudovirales	Siphoviridae	Colossusvirus	116_1	Clustered	2	VC_116_1	2	0.1277	0.941661	0.1202	1	1	1	1
Caulobacter~phage~CcrPW	Caudovirales	Siphoviridae	Colossusvirus	116_1	Clustered	2	VC_116_1	2	0.1277	0.941661	0.1202	1	1	1	1
Caulobacter~phage~CcrSC	Caudovirales	Siphoviridae	Bertelyvirus	116_0	Clustered	2	VC_116_0	2	0.1723	0.941661	0.1623	1	1	1	1
Caulobacter~phage~Lullwater	Caudovirales	Autographiviridae	Lullwatervirus	76_0	Clustered	19	VC_76_0	19	0.4268	1	0.4268	14	1	1	1
Caulobacter~phage~Percy	Caudovirales	Autographiviridae	Percyvirus	76_0	Clustered	19	VC_76_0	19	0.4268	1	0.4268	14	1	1	1
Caulobacter~phage~Seuss	Caudovirales	Siphoviridae	Seussvirus	16_0	Clustered	2	VC_16_0	2	1	1	1	2	1	1	1
Caulobacter~virus~Karma	Caudovirales	Siphoviridae	Phicbkvirus	116_3	Clustered	4	VC_116_3	4	0.2989	0.998339	0.2984	1	1	1	1
Caulobacter~virus~Magneto	Caudovirales	Siphoviridae	Phicbkvirus	116_3	Clustered	4	VC_116_3	4	0.2989	0.998339	0.2984	1	1	1	1
Caulobacter~virus~Rogue	Caudovirales	Siphoviridae	Phicbkvirus	116_2	Clustered	2	VC_116_2	2	0.0822	0.827899	0.068	2	1	1	1
Caulobacter~virus~Swift	Caudovirales	Siphoviridae	Phicbkvirus	116_3	Clustered	4	VC_116_3	4	0.2989	0.998339	0.2984	1	1	1	1
Caulobacter~virus~phiCbK	Caudovirales	Siphoviridae	Phicbkvirus	116_3	Clustered	4	VC_116_3	4	0.2989	0.998339	0.2984	1	1	1	1
Celeribacter~phage~P12053L	Caudovirales	Podoviridae	Unassigned	261_0	Clustered	4	VC_261_0	4	0.7554	0.999931	0.7553	1	1	1	1
Cellulophaga~phage~phi10:1	Caudovirales	Siphoviridae	Unassigned	264_0	Clustered	2	VC_264_0	2	0.409	0.944058	0.3861	1	1	1	1
Cellulophaga~phage~phi12:1	Caudovirales	Siphoviridae	Cba181virus	266_0	Clustered	3	VC_266_0	3	0.8974	0.989354	0.8879	1	1	1	1
Cellulophaga~phage~phi12:2	Petitvirales	Microviridae	Unassigned	268_0	Clustered	2	VC_268_0	2	1	1	1	1	1	1	1
Cellulophaga~phage~phi12a:1	Petitvirales	Microviridae	Unassigned	268_0	Clustered	2	VC_268_0	2	1	1	1	1	1	1	1
Cellulophaga~phage~phi13:2	Caudovirales	Podoviridae	Unassigned	263_0	Clustered	4	VC_263_0	4	0.9151	0.999769	0.9149	1	1	1	1
Cellulophaga~phage~phi14:2	Caudovirales	Podoviridae	Unassigned	269_0	Clustered	2	VC_269_0	2	0.0152	0.926603	0.014	1	1	1	1
Cellulophaga~phage~phi17:1	Caudovirales	Siphoviridae	Cba181virus	266_0	Clustered	3	VC_266_0	3	0.8974	0.989354	0.8879	1	1	1	1
Cellulophaga~phage~phi17:2	Caudovirales	Podoviridae	Cba41virus	265_0	Clustered	2	VC_265_0	2	0.9247	0.912378	0.8437	1	1	1	1
Cellulophaga~phage~phi18:1	Caudovirales	Siphoviridae	Cba181virus	266_0	Clustered	3	VC_266_0	3	0.8974	0.989354	0.8879	1	1	1	1
Cellulophaga~phage~phi18:3	Caudovirales	Podoviridae	Unassigned	263_0	Clustered	4	VC_263_0	4	0.9151	0.999769	0.9149	1	1	1	1
Cellulophaga~phage~phi19:1	Caudovirales	Siphoviridae	Unassigned	264_0	Clustered	2	VC_264_0	2	0.409	0.944058	0.3861	1	1	1	1
Cellulophaga~phage~phi19:3	Caudovirales	Podoviridae	Unassigned	263_0	Clustered	4	VC_263_0	4	0.9151	0.999769	0.9149	1	1	1	1
Cellulophaga~phage~phi38:1	Caudovirales	Podoviridae	Unassigned	269_0	Clustered	2	VC_269_0	2	0.0152	0.926603	0.014	1	1	1	1
Cellulophaga~phage~phi46:3	Caudovirales	Podoviridae	Unassigned	263_0	Clustered	4	VC_263_0	4	0.9151	0.999769	0.9149	1	1	1	1
Cellulophaga~phage~phi4:1	Caudovirales	Podoviridae	Cba41virus	265_0	Clustered	2	VC_265_0	2	0.9247	0.912378	0.8437	1	1	1	1
Chlamydia~phage~2	Petitvirales	Microviridae	Chlamydiamicrovirus	225_0	Clustered	5	VC_225_0	5	0.7953	0.999912	0.7952	2	1	1	1
Chlamydia~phage~4	Petitvirales	Microviridae	Chlamydiamicrovirus	225_0	Clustered	5	VC_225_0	5	0.7953	0.999912	0.7952	2	1	1	1
Chlamydia~phage~CPG1	Petitvirales	Microviridae	Chlamydiamicrovirus	225_0	Clustered	5	VC_225_0	5	0.7953	0.999912	0.7952	2	1	1	1
Chlamydia~virus~CPAR39	Petitvirales	Microviridae	Chlamydiamicrovirus	225_0	Clustered	5	VC_225_0	5	0.7953	0.999912	0.7952	2	1	1	1
Citrobacter~phage~CF1~DK-2017	Caudovirales	Drexlerviridae	Tlsvirus	102_1	Clustered	13	VC_102_1	13	0.2398	1	0.2398	3	2	1	0.9744
Citrobacter~phage~CF1~ERZ-2017	Caudovirales	Myoviridae	Moonvirus	41_8	Clustered	3	VC_41_8	3	0.0209	0.997642	0.0208	1	1	1	1
Citrobacter~phage~CR44b	Caudovirales	Autographiviridae	Kayfunavirus	275_0	Clustered	19	VC_275_0	19	0.6522	1	0.6522	3	1	1	1
Citrobacter~phage~CR8	Caudovirales	Autographiviridae	Caroctavirus	275_0	Clustered	19	VC_275_0	19	0.6522	1	0.6522	3	1	1	1
Citrobacter~phage~CVT22	Caudovirales	Podoviridae	Unassigned	86_0	Clustered	4	VC_86_0	4	0.52	0.999969	0.52	1	1	1	1
Citrobacter~phage~IME-CF2	Caudovirales	Myoviridae	Unassigned	42_1	Clustered	10	VC_42_1	10	0.2886	1	0.2886	1	1	1	1
Citrobacter~phage~Margaery	Caudovirales	Myoviridae	Unassigned	42_1	Clustered	10	VC_42_1	10	0.2886	1	0.2886	1	1	1	1
Citrobacter~phage~Merlin	Caudovirales	Myoviridae	Moonvirus	41_8	Clustered	3	VC_41_8	3	0.0209	0.997642	0.0208	1	1	1	1
Citrobacter~phage~Michonne	Caudovirales	Myoviridae	Mooglevirus	20_0	Clustered	25	VC_20_0	25	0.8985	1	0.8985	5	1	1	0.9933
Citrobacter~phage~Miller	Caudovirales	Myoviridae	Unassigned	42_1	Clustered	10	VC_42_1	10	0.2886	1	0.2886	1	1	1	1
Citrobacter~phage~Moogle	Caudovirales	Myoviridae	Mooglevirus	20_0	Clustered	25	VC_20_0	25	0.8985	1	0.8985	5	1	1	0.9933
Citrobacter~phage~Moon	Caudovirales	Myoviridae	Moonvirus	41_8	Clustered	3	VC_41_8	3	0.0209	0.997642	0.0208	1	1	1	1
Citrobacter~phage~Mordin	Caudovirales	Myoviridae	Mooglevirus	20_0	Clustered	25	VC_20_0	25	0.8985	1	0.8985	5	1	1	0.9933
Citrobacter~phage~SH1	Caudovirales	Autographiviridae	Teetrevirus	276_0	Clustered	59	VC_276_0	59	0.7562	1	0.7562	11	2	1	1
Citrobacter~phage~SH2	Caudovirales	Autographiviridae	Teetrevirus	276_0	Clustered	59	VC_276_0	59	0.7562	1	0.7562	11	2	1	1
Citrobacter~phage~SH3	Caudovirales	Autographiviridae	Kayfunavirus	275_0	Clustered	19	VC_275_0	19	0.6522	1	0.6522	3	1	1	1
Citrobacter~phage~SH4	Caudovirales	Autographiviridae	Kayfunavirus	275_0	Clustered	19	VC_275_0	19	0.6522	1	0.6522	3	1	1	1
Citrobacter~phage~Sazh	Caudovirales	Drexlerviridae	Tlsvirus	102_1	Clustered	13	VC_102_1	13	0.2398	1	0.2398	3	2	1	0.9744
Citrobacter~phage~phiCFP-1	Caudovirales	Autographiviridae	Teetrevirus	276_0	Clustered	59	VC_276_0	59	0.7562	1	0.7562	11	2	1	1
Citrobacter~phage~vB_CfrM_CfP1	Caudovirales	Myoviridae	Unassigned	42_1	Clustered	10	VC_42_1	10	0.2886	1	0.2886	1	1	1	1
Citrobacter~phage~vB_CroP_CrRp3	Caudovirales	Autographiviridae	Vectrevirus	284_0	Clustered	23	VC_284_0	23	0.6936	1	0.6936	7	2	1	1
Citrobacter~virus~Stevie	Caudovirales	Siphoviridae	Tlsvirus	102_1	Clustered	13	VC_102_1	13	0.2398	1	0.2398	3	2	1	0.9744
Clavibacter~phage~CMP1	Caudovirales	Siphoviridae	Cimpunavirus	144_0	Clustered	3	VC_144_0	3	0.6031	0.990548	0.5974	3	1	1	1
Clavibacter~phage~CN1A	Caudovirales	Siphoviridae	Cinunavirus	144_0	Clustered	3	VC_144_0	3	0.6031	0.990548	0.5974	3	1	1	1
Clostridium~phage~CDKM15	Caudovirales	Myoviridae	Lubbockvirus	186_1	Clustered	5	VC_186_1	5	0.3858	1	0.3858	2	1	1	1
Clostridium~phage~CDKM9	Caudovirales	Myoviridae	Lubbockvirus	186_1	Clustered	5	VC_186_1	5	0.3858	1	0.3858	2	1	1	1
Clostridium~phage~CDMH1	Caudovirales	Myoviridae	Lubbockvirus	186_2	Clustered	4	VC_186_2	4	0.281	0.999979	0.281	2	1	1	1
Clostridium~phage~CPS2	Caudovirales	Podoviridae	Unassigned	288_0	Clustered	4	VC_288_0	4	0.5907	0.999871	0.5906	1	1	1	1
Clostridium~phage~PhiS63	Caudovirales	Siphoviridae	Unassigned	195_0	Clustered	3	VC_195_0	3	0.2544	0.988393	0.2514	1	1	1	1
Clostridium~phage~phi3626	Caudovirales	Siphoviridae	Unassigned	195_0	Clustered	3	VC_195_0	3	0.2544	0.988393	0.2514	1	1	1	1
Clostridium~phage~phi8074-B1	Caudovirales	Siphoviridae	Unassigned	173_0	Clustered	3	VC_173_0	3	0.614	0.95472	0.5862	1	1	1	1
Clostridium~phage~phiCD111	Caudovirales	Siphoviridae	Unassigned	257_0	Clustered	3	VC_257_0	3	0.524	0.997451	0.5226	1	1	1	1
Clostridium~phage~phiCD146	Caudovirales	Siphoviridae	Unassigned	257_0	Clustered	3	VC_257_0	3	0.524	0.997451	0.5226	1	1	1	1
Clostridium~phage~phiCD38-2	Caudovirales	Siphoviridae	Unassigned	257_0	Clustered	3	VC_257_0	3	0.524	0.997451	0.5226	1	1	1	1
Clostridium~phage~phiCD481-1	Caudovirales	Myoviridae	Unassigned	286_0	Clustered	6	VC_286_0	6	0.6009	1	0.6009	1	1	1	1
Clostridium~phage~phiCD505	Caudovirales	Myoviridae	Lubbockvirus	186_1	Clustered	5	VC_186_1	5	0.3858	1	0.3858	2	1	1	1
Clostridium~phage~phiCD506	Caudovirales	Myoviridae	Unassigned	286_0	Clustered	6	VC_286_0	6	0.6009	1	0.6009	1	1	1	1
Clostridium~phage~phiCDHM11	Caudovirales	Myoviridae	Unassigned	286_0	Clustered	6	VC_286_0	6	0.6009	1	0.6009	1	1	1	1
Clostridium~phage~phiCDHM13	Caudovirales	Myoviridae	Unassigned	286_0	Clustered	6	VC_286_0	6	0.6009	1	0.6009	1	1	1	1
Clostridium~phage~phiCDHM14	Caudovirales	Myoviridae	Unassigned	286_0	Clustered	6	VC_286_0	6	0.6009	1	0.6009	1	1	1	1
Clostridium~phage~phiCDHM19	Caudovirales	Myoviridae	Lubbockvirus	186_0	Clustered	2	VC_186_0	2	0.0946	0.950752	0.0899	2	1	1	1
Clostridium~phage~phiCP13O	Caudovirales	Siphoviridae	Unassigned	289_0	Clustered	4	VC_289_0	4	1	1	1	1	1	1	1
Clostridium~phage~phiCP26F	Caudovirales	Siphoviridae	Unassigned	289_0	Clustered	4	VC_289_0	4	1	1	1	1	1	1	1
Clostridium~phage~phiCP34O	Caudovirales	Siphoviridae	Unassigned	289_0	Clustered	4	VC_289_0	4	1	1	1	1	1	1	1
Clostridium~phage~phiCP39-O	Caudovirales	Siphoviridae	Unassigned	289_0	Clustered	4	VC_289_0	4	1	1	1	1	1	1	1
Clostridium~phage~phiCP7R	Caudovirales	Podoviridae	Unassigned	288_0	Clustered	4	VC_288_0	4	0.5907	0.999871	0.5906	1	1	1	1
Clostridium~phage~phiCPV4	Caudovirales	Podoviridae	Unassigned	288_0	Clustered	4	VC_288_0	4	0.5907	0.999871	0.5906	1	1	1	1
Clostridium~phage~phiCT19406A	Caudovirales	Siphoviridae	Unassigned	198_0	Clustered	2	VC_198_0	2	0.437	0.941042	0.4112	1	1	1	1
Clostridium~phage~phiCT19406B	Caudovirales	Myoviridae	Unassigned	63_0	Clustered	3	VC_63_0	3	0.4006	0.998002	0.3998	1	1	1	1
Clostridium~phage~phiCT453B	Caudovirales	Myoviridae	Unassigned	63_0	Clustered	3	VC_63_0	3	0.4006	0.998002	0.3998	1	1	1	1
Clostridium~phage~phiCTC2A	Caudovirales	Siphoviridae	Unassigned	198_0	Clustered	2	VC_198_0	2	0.437	0.941042	0.4112	1	1	1	1
Clostridium~phage~phiCTC2B	Caudovirales	Myoviridae	Unassigned	63_0	Clustered	3	VC_63_0	3	0.4006	0.998002	0.3998	1	1	1	1
Clostridium~phage~phiCTP1	Caudovirales	Siphoviridae	Unassigned	173_0	Clustered	3	VC_173_0	3	0.614	0.95472	0.5862	1	1	1	1
Clostridium~phage~phiMMP01	Caudovirales	Myoviridae	Lubbockvirus	186_2	Clustered	4	VC_186_2	4	0.281	0.999979	0.281	2	1	1	1
Clostridium~phage~phiMMP02	Caudovirales	Myoviridae	Lubbockvirus	186_1	Clustered	5	VC_186_1	5	0.3858	1	0.3858	2	1	1	1
Clostridium~phage~phiMMP03	Caudovirales	Myoviridae	Lubbockvirus	186_2	Clustered	4	VC_186_2	4	0.281	0.999979	0.281	2	1	1	1
Clostridium~phage~phiMMP04	Caudovirales	Myoviridae	Unassigned	286_0	Clustered	6	VC_286_0	6	0.6009	1	0.6009	1	1	1	1
Clostridium~phage~phiSM101	Caudovirales	Siphoviridae	Unassigned	195_0	Clustered	3	VC_195_0	3	0.2544	0.988393	0.2514	1	1	1	1
Clostridium~phage~phiZP2	Caudovirales	Podoviridae	Unassigned	288_0	Clustered	4	VC_288_0	4	0.5907	0.999871	0.5906	1	1	1	1
Clostridium~virus~phiC2	Caudovirales	Myoviridae	Cd119virus	186_2	Clustered	4	VC_186_2	4	0.281	0.999979	0.281	2	1	1	1
Clostridium~virus~phiCD119	Caudovirales	Myoviridae	Cd119virus	186_0	Clustered	2	VC_186_0	2	0.0946	0.950752	0.0899	2	1	1	1
Clostridium~virus~phiCD27	Caudovirales	Myoviridae	Cd119virus	186_1	Clustered	5	VC_186_1	5	0.3858	1	0.3858	2	1	1	1
Corynebacterium~phage~Adelaide	Caudovirales	Siphoviridae	Unassigned	199_0	Clustered	6	VC_199_0	6	0.7401	1	0.7401	2	1	1	1
Corynebacterium~phage~BFK20	Caudovirales	Siphoviridae	Sasvirus	157_0	Clustered	3	VC_157_0	3	0.6117	0.997488	0.6101	2	1	1	1
Corynebacterium~phage~C3PO	Caudovirales	Siphoviridae	Ceetrepovirus	295_0	Clustered	3	VC_295_0	3	0.6629	0.995531	0.66	1	1	1	1
Corynebacterium~phage~Darwin	Caudovirales	Siphoviridae	Ceetrepovirus	295_0	Clustered	3	VC_295_0	3	0.6629	0.995531	0.66	1	1	1	1
Corynebacterium~phage~Dina	Caudovirales	Siphoviridae	Unassigned	199_0	Clustered	6	VC_199_0	6	0.7401	1	0.7401	2	1	1	1
Corynebacterium~phage~Lederberg	Caudovirales	Siphoviridae	Unassigned	199_0	Clustered	6	VC_199_0	6	0.7401	1	0.7401	2	1	1	1
Corynebacterium~phage~SamW	Caudovirales	Siphoviridae	Samwavirus	199_0	Clustered	6	VC_199_0	6	0.7401	1	0.7401	2	1	1	1
Corynebacterium~phage~StAB	Caudovirales	Siphoviridae	Unassigned	199_0	Clustered	6	VC_199_0	6	0.7401	1	0.7401	2	1	1	1
Corynebacterium~phage~Stiles	Caudovirales	Siphoviridae	Unassigned	199_0	Clustered	6	VC_199_0	6	0.7401	1	0.7401	2	1	1	1
Corynebacterium~phage~Zion	Caudovirales	Siphoviridae	Ceetrepovirus	295_0	Clustered	3	VC_295_0	3	0.6629	0.995531	0.66	1	1	1	1
Corynebacterium~phage~phi673	Caudovirales	Siphoviridae	Ikedavirus	157_0	Clustered	3	VC_157_0	3	0.6117	0.997488	0.6101	2	1	1	1
Corynebacterium~phage~phi674	Caudovirales	Siphoviridae	Ikedavirus	157_0	Clustered	3	VC_157_0	3	0.6117	0.997488	0.6101	2	1	1	1
Cronobacter~phage~CR5	Caudovirales	Myoviridae	Derbicusvirus	299_0	Clustered	4	VC_299_0	4	0.1436	0.999981	0.1436	1	1	1	1
Cronobacter~phage~CS01	Caudovirales	Drexlerviridae	Unassigned	102_0	Clustered	21	VC_102_0	21	0.3686	1	0.3686	6	2	1	0.9381
Cronobacter~phage~Dev-CD-23823	Caudovirales	Autographiviridae	Cronosvirus	75_0	Clustered	14	VC_75_0	14	0.6366	1	0.6366	8	1	1	1
Cronobacter~phage~Dev2	Caudovirales	Autographiviridae	Kayfunavirus	275_0	Clustered	19	VC_275_0	19	0.6522	1	0.6522	3	1	1	1
Cronobacter~phage~ESSI-2	Caudovirales	Myoviridae	Seongnamvirus	107_0	Clustered	14	VC_107_0	14	0.8861	1	0.8861	8	1	1	1
Cronobacter~phage~GW1	Caudovirales	Autographiviridae	Kayfunavirus	275_0	Clustered	19	VC_275_0	19	0.6522	1	0.6522	3	1	1	1
Cronobacter~phage~vB_CsaM_GAP161	Caudovirales	Myoviridae	Unassigned	42_1	Clustered	10	VC_42_1	10	0.2886	1	0.2886	1	1	1	1
Cronobacter~phage~vB_CsaM_GAP31	Caudovirales	Myoviridae	Se1virus	68_3	Clustered	2	VC_68_3	2	0.0309	0.921267	0.0284	1	1	1	1
Cronobacter~phage~vB_CsaM_GAP32	Caudovirales	Myoviridae	Mimasvirus	114_2	Clustered/Singleton	1	VC_114_2	1	0	1	0	1	1	1	1
Cronobacter~phage~vB_CsaM_leB	Caudovirales	Myoviridae	Unassigned	42_1	Clustered	10	VC_42_1	10	0.2886	1	0.2886	1	1	1	1
Cronobacter~phage~vB_CsaM_leE	Caudovirales	Myoviridae	Unassigned	42_1	Clustered	10	VC_42_1	10	0.2886	1	0.2886	1	1	1	1
Cronobacter~phage~vB_CsaP_009	Caudovirales	Podoviridae	Unassigned	83_0	Clustered	2	VC_83_0	2	0.162	0.952255	0.1542	1	1	1	1
Cronobacter~phage~vB_CsaP_GAP52	Caudovirales	Podoviridae	Unassigned	83_1	Clustered	2	VC_83_1	2	0.081	0.952703	0.0772	1	1	1	1
Cronobacter~phage~vB_CskP_GAP227	Caudovirales	Autographiviridae	Cronosvirus	75_0	Clustered	14	VC_75_0	14	0.6366	1	0.6366	8	1	1	1
Cronobacter~virus~Esp2949-1	Caudovirales	Siphoviridae	Unassigned	102_0	Clustered	21	VC_102_0	21	0.3686	1	0.3686	6	2	1	0.9381
Curvibacter~phage~P26059B	Caudovirales	Autographiviridae	Kalppathivirus	76_0	Clustered	19	VC_76_0	19	0.4268	1	0.4268	14	1	1	1
Cyanophage~9515-10a	Caudovirales	Autographiviridae	Tangaroavirus	308_0	Clustered	20	VC_308_0	20	0.8878	1	0.8878	16	2	1	1
Cyanophage~KBS-P-1A	Caudovirales	Autographiviridae	Unassigned	308_0	Clustered	20	VC_308_0	20	0.8878	1	0.8878	16	2	1	1
Cyanophage~MED4-117	Caudovirales	Siphoviridae	Unassigned	311_0	Clustered	2	VC_311_0	2	0.7806	0.729854	0.5698	1	1	1	1
Cyanophage~NATL1A-7	Caudovirales	Autographiviridae	Cheungvirus	308_0	Clustered	20	VC_308_0	20	0.8878	1	0.8878	16	2	1	1
Cyanophage~NATL2A-133	Caudovirales	Autographiviridae	Tangaroavirus	308_0	Clustered	20	VC_308_0	20	0.8878	1	0.8878	16	2	1	1
Cyanophage~P-RSM1	Caudovirales	Myoviridae	Unassigned	32_32	Clustered	2	VC_32_32	2	0.0141	0.936472	0.0132	1	1	1	1
Cyanophage~P-RSM6	Caudovirales	Myoviridae	Libanvirus	32_11	Clustered/Singleton	1	VC_32_11	1	0	1	0	1	1	1	1
Cyanophage~P-SSP2	Caudovirales	Autographiviridae	Tritonvirus	308_0	Clustered	20	VC_308_0	20	0.8878	1	0.8878	16	2	1	1
Cyanophage~P-TIM40	Caudovirales	Myoviridae	Libanvirus	32_22	Clustered/Singleton	1	VC_32_22	1	0	1	0	1	1	1	1
Cyanophage~PP	Caudovirales	Podoviridae	Unassigned	119_0	Clustered	2	VC_119_0	2	0.5565	0.868224	0.4832	1	1	1	1
Cyanophage~PSS2	Caudovirales	Siphoviridae	Unassigned	313_0	Clustered	2	VC_313_0	2	0.8715	0.855578	0.7456	1	1	1	1
Cyanophage~S-RIM12	Caudovirales	Myoviridae	Brizovirus	32_7	Clustered	7	VC_32_7	7	0.0848	1	0.0848	2	1	1	0.7619
Cyanophage~S-RIM32	Caudovirales	Myoviridae	Unassigned	32_18	Clustered/Singleton	1	VC_32_18	1	0	1	0	1	1	1	1
Cyanophage~S-RIM44	Caudovirales	Myoviridae	Vellamovirus	32_17	Clustered	2	VC_32_17	2	0.0173	0.932096	0.0161	1	1	1	1
Cyanophage~S-RIM50	Caudovirales	Myoviridae	Neptunevirus	32_4	Clustered	3	VC_32_4	3	0.026	0.988611	0.0257	1	1	1	1
Cyanophage~S-TIM4	Caudovirales	Myoviridae	Thaumasvirus	32_31	Clustered	2	VC_32_31	2	0.0138	0.934965	0.0129	1	1	1	1
Cyanophage~S-TIM5	Caudovirales	Myoviridae	Aurunvirus	312_0	Clustered/Singleton	1	VC_312_0	1	0	1	0	1	1	1	1
Cyanophage~SS120-1	Caudovirales	Autographiviridae	Banchanvirus	308_0	Clustered	20	VC_308_0	20	0.8878	1	0.8878	16	2	1	1
Cyanophage~Syn30	Caudovirales	Myoviridae	Leucotheavirus	32_34	Clustered	2	VC_32_34	2	0.013	0.900249	0.0117	1	1	1	1
Deep-sea~thermophilic~phage~D6E	Caudovirales	Myoviridae	Unassigned	60_0	Clustered	3	VC_60_0	3	0.2654	0.990409	0.2629	1	2	1	0.6667
Delftia~phage~RG-2014	Caudovirales	Podoviridae	Jwalphavirus	7_0	Clustered	20	VC_7_0	20	0.5726	1	0.5726	7	1	1	0.8316
Dickeya~phage~BF25/12	Caudovirales	Autographiviridae	Stompvirus	78_0	Clustered	16	VC_78_0	16	0.7636	1	0.7636	4	1	1	1
Dickeya~phage~Dagda	Caudovirales	Autographiviridae	Aarhusvirus	278_0	Clustered	4	VC_278_0	4	0.1354	0.999987	0.1353	1	1	1	1
Dickeya~phage~Katbat	Caudovirales	Autographiviridae	Aarhusvirus	278_0	Clustered	4	VC_278_0	4	0.1354	0.999987	0.1353	1	1	1	1
Dickeya~phage~Luksen	Caudovirales	Autographiviridae	Aarhusvirus	278_0	Clustered	4	VC_278_0	4	0.1354	0.999987	0.1353	1	1	1	1
Dickeya~phage~Mysterion	Caudovirales	Autographiviridae	Aarhusvirus	278_0	Clustered	4	VC_278_0	4	0.1354	0.999987	0.1353	1	1	1	1
Dickeya~phage~RC-2014	Caudovirales	Ackermannviridae	Limestonevirus	33_2	Clustered	7	VC_33_2	7	0.0561	0.987748	0.0554	3	1	1	1
Dickeya~phage~vB_DsoM_AD1	Caudovirales	Myoviridae	Alexandravirus	318_1	Clustered	3	VC_318_1	3	0.2219	0.987345	0.2191	2	1	1	1
Dickeya~phage~vB_DsoM_JA11	Caudovirales	Myoviridae	Salmondvirus	318_0	Clustered	2	VC_318_0	2	0.1028	0.933768	0.096	1	1	1	1
Dickeya~phage~vB_DsoM_JA29	Caudovirales	Myoviridae	Salmondvirus	318_0	Clustered	2	VC_318_0	2	0.1028	0.933768	0.096	1	1	1	1
Dickeya~virus~Limestone	Caudovirales	Ackermannviridae	Limestonevirus	33_2	Clustered	7	VC_33_2	7	0.0561	0.987748	0.0554	3	1	1	1
Edwardsiella~phage~KF-1	Caudovirales	Podoviridae	Kf1virus	321_0	Clustered	3	VC_321_0	3	1	1	1	2	1	1	1
Edwardsiella~phage~MSW-3	Caudovirales	Myoviridae	Msw3virus	103_0	Clustered	8	VC_103_0	8	0.8711	1	0.8711	4	1	1	0.8571
Edwardsiella~phage~PEi20	Caudovirales	Myoviridae	Unassigned	41_3	Clustered	2	VC_41_3	2	0.0104	0.938973	0.0098	1	1	1	1
Edwardsiella~phage~PEi21	Caudovirales	Myoviridae	Msw3virus	103_0	Clustered	8	VC_103_0	8	0.8711	1	0.8711	4	1	1	0.8571
Edwardsiella~phage~eiAU	Caudovirales	Siphoviridae	Eiauvirus	305_0	Clustered	2	VC_305_0	2	0.1096	0.954539	0.1046	1	1	1	1
Edwardsiella~phage~eiAU-183	Caudovirales	Siphoviridae	Eiauvirus	305_0	Clustered	2	VC_305_0	2	0.1096	0.954539	0.1046	1	1	1	1
Edwardsiella~virus~pEt-SU	Caudovirales	Myoviridae	Unassigned	298_0	Clustered	2	VC_298_0	2	0.1009	0.953085	0.0962	1	1	1	1
Eggerthella~phage~PMBT5	Caudovirales	Siphoviridae	Lentavirus	177_0	Clustered	2	VC_177_0	2	0.0804	0.896402	0.072	2	1	1	1
Enteritis_DCY0308.NODE_5622_6212	Unassigned	Unassigned	Unassigned	330_0	Clustered	2	VC_330_0	2	0.007	0.952022	0.0066	1	1	1	1
Enterobacter~phage~Arya	Caudovirales	Myoviridae	Jilinvirus	98_0	Clustered	5	VC_98_0	5	0.3776	1	0.3776	2	1	1	1
Enterobacter~phage~CC31	Caudovirales	Myoviridae	Cc31virus	41_9	Clustered	2	VC_41_9	2	0.0102	0.948364	0.0097	1	1	1	1
Enterobacter~phage~E-2	Caudovirales	Autographiviridae	Teetrevirus	276_0	Clustered	59	VC_276_0	59	0.7562	1	0.7562	11	2	1	1
Enterobacter~phage~E-3	Caudovirales	Autographiviridae	Teetrevirus	276_0	Clustered	59	VC_276_0	59	0.7562	1	0.7562	11	2	1	1
Enterobacter~phage~Ec_L1	Caudovirales	Drexlerviridae	Eclunavirus	102_0	Clustered	21	VC_102_0	21	0.3686	1	0.3686	6	2	1	0.9381
Enterobacter~phage~Enc34	Caudovirales	Siphoviridae	Chivirus	18_0	Clustered	20	VC_18_0	20	0.8567	1	0.8567	2	2	2	1
Enterobacter~phage~EspM4VN	Caudovirales	Ackermannviridae	Agtrevirus	33_2	Clustered	7	VC_33_2	7	0.0561	0.987748	0.0554	3	1	1	1
Enterobacter~phage~PG7	Caudovirales	Myoviridae	Cc31virus	41_9	Clustered	2	VC_41_9	2	0.0102	0.948364	0.0097	1	1	1	1
Enterobacter~phage~Tyrion	Caudovirales	Podoviridae	Uetakevirus	226_0	Clustered	5	VC_226_0	5	0.6977	1	0.6977	2	1	1	1
Enterobacter~phage~phiEap-2	Caudovirales	Siphoviridae	Cornellvirus	105_0	Clustered	24	VC_105_0	24	0.856	1	0.856	5	1	1	1
Enterobacter~phage~phiEap-3	Caudovirales	Myoviridae	Kp15virus	42_0	Clustered	6	VC_42_0	6	0.1405	1	0.1405	2	1	1	1
Enterobacter~phage~phiKDA1	Caudovirales	Autographiviridae	Koutsourovirus	314_0	Clustered	21	VC_314_0	21	0.7496	1	0.7496	3	2	1	1
Enterobacter~phage~phiT5282H	Caudovirales	Myoviridae	Peduovirus	108_0	Clustered	44	VC_108_0	44	0.8526	1	0.8526	14	1	1	1
Enterobacter~phage~vB_EclM_CIP9	Caudovirales	Myoviridae	Unassigned	41_3	Clustered	2	VC_41_3	2	0.0104	0.938973	0.0098	1	1	1	1
Enterobacter~virus~F20	Caudovirales	Siphoviridae	Kp36virus	273_0	Clustered	18	VC_273_0	18	0.5114	1	0.5114	2	2	1	1
Enterobacteria~phage~13a	Caudovirales	Autographiviridae	Teseptimavirus	276_0	Clustered	59	VC_276_0	59	0.7562	1	0.7562	11	2	1	1
Enterobacteria~phage~285P	Caudovirales	Autographiviridae	Teseptimavirus	276_0	Clustered	59	VC_276_0	59	0.7562	1	0.7562	11	2	1	1
Enterobacteria~phage~9g	Caudovirales	Siphoviridae	Nonagvirus	3_1	Clustered	6	VC_3_1	6	0.465	1	0.465	2	1	1	1
Enterobacteria~phage~BA14	Caudovirales	Autographiviridae	Berlinvirus	276_0	Clustered	59	VC_276_0	59	0.7562	1	0.7562	11	2	1	1
Enterobacteria~phage~BP-4795	Caudovirales	Siphoviridae	Unassigned	240_0	Clustered	3	VC_240_0	3	0.0934	0.998477	0.0933	1	1	1	1
Enterobacteria~phage~Bp7	Caudovirales	Myoviridae	Js98virus	41_1	Clustered	8	VC_41_1	8	0.0692	1	0.0692	2	1	1	1
Enterobacteria~phage~C-1~INW-2012	Levivirales	Leviviridae	Levivirus	336_0	Clustered	4	VC_336_0	4	0.7433	0.999976	0.7433	1	1	1	1
Enterobacteria~phage~EcoDS1	Caudovirales	Autographiviridae	Teseptimavirus	275_0	Clustered	19	VC_275_0	19	0.6522	1	0.6522	3	1	1	1
Enterobacteria~phage~GEC-3S	Caudovirales	Myoviridae	Krischvirus	43_0	Clustered	5	VC_43_0	5	0.1237	1	0.1237	2	1	1	1
Enterobacteria~phage~HK106	Caudovirales	Siphoviridae	Hk97virus	239_0	Clustered	13	VC_239_0	13	0.412	1	0.412	2	1	1	1
Enterobacteria~phage~HK140	Caudovirales	Siphoviridae	Hendrixvirus	239_0	Clustered	13	VC_239_0	13	0.412	1	0.412	2	1	1	1
Enterobacteria~phage~HK620	Caudovirales	Podoviridae	Lederbergvirus	219_0	Clustered	18	VC_219_0	18	0.5384	1	0.5384	2	1	1	0.8497
Enterobacteria~phage~Hgal1	Levivirales	Leviviridae	Levivirus	336_0	Clustered	4	VC_336_0	4	0.7433	0.999976	0.7433	1	1	1	1
Enterobacteria~phage~IME08	Caudovirales	Myoviridae	Js98virus	41_1	Clustered	8	VC_41_1	8	0.0692	1	0.0692	2	1	1	1
Enterobacteria~phage~IME_EC2	Caudovirales	Siphoviridae	Murrayvirus	220_0	Clustered	6	VC_220_0	6	0.6777	1	0.6777	4	2	1	1
Enterobacteria~phage~If1	Tubulavirales	Inoviridae	Infulavirus	341_0	Clustered	3	VC_341_0	3	0.689	0.963901	0.6641	2	1	1	1
Enterobacteria~phage~J8-65	Caudovirales	Autographiviridae	Unassigned	77_0	Clustered	3	VC_77_0	3	0.1747	0.99847	0.1745	3	2	1	1
Enterobacteria~phage~JenK1	Caudovirales	Siphoviridae	Nonagvirus	3_1	Clustered	6	VC_3_1	6	0.465	1	0.465	2	1	1	1
Enterobacteria~phage~JenP1	Caudovirales	Siphoviridae	Nonagvirus	3_1	Clustered	6	VC_3_1	6	0.465	1	0.465	2	1	1	1
Enterobacteria~phage~JenP2	Caudovirales	Siphoviridae	Nonagvirus	3_1	Clustered	6	VC_3_1	6	0.465	1	0.465	2	1	1	1
Enterobacteria~phage~K1F	Caudovirales	Autographiviridae	Teseptimavirus	275_0	Clustered	19	VC_275_0	19	0.6522	1	0.6522	3	1	1	1
Enterobacteria~phage~M	Levivirales	Leviviridae	Levivirus	336_0	Clustered	4	VC_336_0	4	0.7433	0.999976	0.7433	1	1	1	1
Enterobacteria~phage~P88	Caudovirales	Myoviridae	Peduovirus	108_0	Clustered	44	VC_108_0	44	0.8526	1	0.8526	14	1	1	1
Enterobacteria~phage~PR4	Kalamavirales	Tectiviridae	Alphatectivirus	342_0	Clustered	2	VC_342_0	2	0.9117	0.76025	0.6931	1	1	1	1
Enterobacteria~phage~PRD1	Kalamavirales	Tectiviridae	Alphatectivirus	342_0	Clustered	2	VC_342_0	2	0.9117	0.76025	0.6931	1	1	1	1
Enterobacteria~phage~RB27	Caudovirales	Myoviridae	Tequatrovirus	41_6	Clustered	32	VC_41_6	32	0.3634	1	0.3634	3	1	1	0.996
Enterobacteria~phage~RB51	Caudovirales	Myoviridae	Tequatrovirus	41_6	Clustered	32	VC_41_6	32	0.3634	1	0.3634	3	1	1	0.996
Enterobacteria~phage~RB68	Caudovirales	Myoviridae	Tequatrovirus	41_6	Clustered	32	VC_41_6	32	0.3634	1	0.3634	3	1	1	0.996
Enterobacteria~phage~SP	Levivirales	Leviviridae	Allolevivirus	45_0	Clustered	3	VC_45_0	3	0.7433	0.996222	0.7405	1	1	1	1
Enterobacteria~phage~ST104	Caudovirales	Podoviridae	Lederbergvirus	219_0	Clustered	18	VC_219_0	18	0.5384	1	0.5384	2	1	1	0.8497
Enterobacteria~phage~Sf101	Caudovirales	Podoviridae	Lederbergvirus	219_0	Clustered	18	VC_219_0	18	0.5384	1	0.5384	2	1	1	0.8497
Enterobacteria~phage~SfV	Caudovirales	Myoviridae	Unassigned	221_0	Clustered	6	VC_221_0	6	0.6177	1	0.6177	1	1	1	1
Enterobacteria~phage~T3	Caudovirales	Autographiviridae	Teetrevirus	276_0	Clustered	59	VC_276_0	59	0.7562	1	0.7562	11	2	1	1
Enterobacteria~phage~T7M	Caudovirales	Autographiviridae	Teetrevirus	276_0	Clustered	59	VC_276_0	59	0.7562	1	0.7562	11	2	1	1
Enterobacteria~phage~UAB_Phi20	Caudovirales	Podoviridae	Lederbergvirus	219_0	Clustered	18	VC_219_0	18	0.5384	1	0.5384	2	1	1	0.8497
Enterobacteria~phage~UAB_Phi78	Caudovirales	Autographiviridae	Zindervirus	284_0	Clustered	23	VC_284_0	23	0.6936	1	0.6936	7	2	1	1
Enterobacteria~phage~VT2-Sakai	Caudovirales	Podoviridae	Traversvirus	253_1	Clustered	14	VC_253_1	14	0.5724	1	0.5724	5	1	1	0.8901
Enterobacteria~phage~VT2phi_272	Caudovirales	Podoviridae	Oslovirus	253_1	Clustered	14	VC_253_1	14	0.5724	1	0.5724	5	1	1	0.8901
Enterobacteria~phage~WA13~sensu~lato	Petitvirales	Microviridae	Alphatrevirus	338_0	Clustered	11	VC_338_0	11	0.6947	1	0.6947	2	1	1	1
Enterobacteria~phage~YYZ-2008	Caudovirales	Siphoviridae	Unassigned	240_0	Clustered	3	VC_240_0	3	0.0934	0.998477	0.0933	1	1	1	1
Enterobacteria~phage~fd	Tubulavirales	Inoviridae	Inovirus	341_0	Clustered	3	VC_341_0	3	0.689	0.963901	0.6641	2	1	1	1
Enterobacteria~phage~fiAA91-ss	Caudovirales	Myoviridae	Peduovirus	108_0	Clustered	44	VC_108_0	44	0.8526	1	0.8526	14	1	1	1
Enterobacteria~phage~mEp235	Caudovirales	Siphoviridae	Hendrixvirus	239_0	Clustered	13	VC_239_0	13	0.412	1	0.412	2	1	1	1
Enterobacteria~phage~phi92	Caudovirales	Myoviridae	Unassigned	69_1	Clustered/Singleton	1	VC_69_1	1	0	1	0	1	1	1	1
Enterobacteria~phage~phiEcoM-GJ1	Caudovirales	Chaseviridae	Carltongylesvirus	94_0	Clustered	11	VC_94_0	11	0.8494	1	0.8494	5	2	1	1
Enterobacteria~phage~phiP27	Caudovirales	Myoviridae	Unassigned	221_0	Clustered	6	VC_221_0	6	0.6177	1	0.6177	1	1	1	1
Enterobacteria~phage~vB_EcoP_ACG-C91	Caudovirales	Autographiviridae	Zindervirus	284_0	Clustered	23	VC_284_0	23	0.6936	1	0.6936	7	2	1	1
Enterobacteria~phage~vB_EcoP_IME390	Caudovirales	Autographiviridae	Teseptimavirus	276_0	Clustered	59	VC_276_0	59	0.7562	1	0.7562	11	2	1	1
Enterobacteria~phage~vB_EcoS_IME18	Caudovirales	Drexlerviridae	Tunavirus	102_0	Clustered	21	VC_102_0	21	0.3686	1	0.3686	6	2	1	0.9381
Enterobacteria~phage~vB_EcoS_IME347	Caudovirales	Drexlerviridae	Unassigned	102_0	Clustered	21	VC_102_0	21	0.3686	1	0.3686	6	2	1	0.9381
Enterobacteria~phage~vB_EcoS_NBD2	Caudovirales	Drexlerviridae	Eclunavirus	102_0	Clustered	21	VC_102_0	21	0.3686	1	0.3686	6	2	1	0.9381
Enterobacteriaphage~UAB_Phi87	Caudovirales	Myoviridae	Felixo1virus	20_0	Clustered	25	VC_20_0	25	0.8985	1	0.8985	5	1	1	0.9933
Enterococcus~phage~AUEF3	Caudovirales	Siphoviridae	Efquatrovirus	344_0	Clustered	16	VC_344_0	16	0.8906	1	0.8906	2	1	1	1
Enterococcus~phage~BC611	Caudovirales	Siphoviridae	Sap6virus	207_0	Clustered	6	VC_207_0	6	0.8802	1	0.8802	2	1	1	1
Enterococcus~phage~EFC-1	Caudovirales	Siphoviridae	Unassigned	122_0	Clustered/Singleton	1	VC_122_0	1	0	1	0	1	1	1	1
Enterococcus~phage~Ec-ZZ2	Caudovirales	Siphoviridae	Efquatrovirus	344_0	Clustered	16	VC_344_0	16	0.8906	1	0.8906	2	1	1	1
Enterococcus~phage~EfaCPT1	Caudovirales	Siphoviridae	Efquatrovirus	344_0	Clustered	16	VC_344_0	16	0.8906	1	0.8906	2	1	1	1
Enterococcus~phage~IME-EF4	Caudovirales	Siphoviridae	Efquatrovirus	344_0	Clustered	16	VC_344_0	16	0.8906	1	0.8906	2	1	1	1
Enterococcus~phage~IME-EFm1	Caudovirales	Siphoviridae	Unassigned	344_0	Clustered	16	VC_344_0	16	0.8906	1	0.8906	2	1	1	1
Enterococcus~phage~IME-EFm5	Caudovirales	Siphoviridae	Unassigned	344_0	Clustered	16	VC_344_0	16	0.8906	1	0.8906	2	1	1	1
Enterococcus~phage~IMEEF1	Caudovirales	Siphoviridae	Sap6virus	207_0	Clustered	6	VC_207_0	6	0.8802	1	0.8802	2	1	1	1
Enterococcus~phage~IME_EF3	Caudovirales	Siphoviridae	Efquatrovirus	344_0	Clustered	16	VC_344_0	16	0.8906	1	0.8906	2	1	1	1
Enterococcus~phage~LY0322	Caudovirales	Siphoviridae	Efquatrovirus	344_0	Clustered	16	VC_344_0	16	0.8906	1	0.8906	2	1	1	1
Enterococcus~phage~PMBT2	Caudovirales	Siphoviridae	Efquatrovirus	344_0	Clustered	16	VC_344_0	16	0.8906	1	0.8906	2	1	1	1
Enterococcus~phage~SANTOR1	Caudovirales	Siphoviridae	Efquatrovirus	344_0	Clustered	16	VC_344_0	16	0.8906	1	0.8906	2	1	1	1
Enterococcus~phage~SAP6	Caudovirales	Siphoviridae	Sap6virus	207_0	Clustered	6	VC_207_0	6	0.8802	1	0.8802	2	1	1	1
Enterococcus~phage~VD13	Caudovirales	Siphoviridae	Sap6virus	207_0	Clustered	6	VC_207_0	6	0.8802	1	0.8802	2	1	1	1
Enterococcus~phage~phiFL1A	Caudovirales	Siphoviridae	Phifelvirus	231_0	Clustered	3	VC_231_0	3	0.4826	0.997284	0.4813	1	1	1	1
Enterococcus~phage~phiFL2A	Caudovirales	Siphoviridae	Phifelvirus	231_0	Clustered	3	VC_231_0	3	0.4826	0.997284	0.4813	1	1	1	1
Enterococcus~phage~phiFL3A	Caudovirales	Siphoviridae	Phifelvirus	231_0	Clustered	3	VC_231_0	3	0.4826	0.997284	0.4813	1	1	1	1
Enterococcus~phage~phiSHEF2	Caudovirales	Siphoviridae	Efquatrovirus	344_0	Clustered	16	VC_344_0	16	0.8906	1	0.8906	2	1	1	1
Enterococcus~phage~phiSHEF4	Caudovirales	Siphoviridae	Efquatrovirus	344_0	Clustered	16	VC_344_0	16	0.8906	1	0.8906	2	1	1	1
Enterococcus~phage~phiSHEF5	Caudovirales	Siphoviridae	Efquatrovirus	344_0	Clustered	16	VC_344_0	16	0.8906	1	0.8906	2	1	1	1
Enterococcus~phage~vB_EfaS_AL2	Caudovirales	Siphoviridae	Efquatrovirus	344_0	Clustered	16	VC_344_0	16	0.8906	1	0.8906	2	1	1	1
Enterococcus~phage~vB_EfaS_AL3	Caudovirales	Siphoviridae	Efquatrovirus	344_0	Clustered	16	VC_344_0	16	0.8906	1	0.8906	2	1	1	1
Enterococcus~phage~vB_EfaS_IME196	Caudovirales	Siphoviridae	Efquatrovirus	344_0	Clustered	16	VC_344_0	16	0.8906	1	0.8906	2	1	1	1
Enterococcus~phage~vB_EfaS_IME198	Caudovirales	Siphoviridae	Saphexavirus	207_0	Clustered	6	VC_207_0	6	0.8802	1	0.8802	2	1	1	1
Erwinia~amylovora~phage~Era103	Caudovirales	Podoviridae	Sp6virus	284_0	Clustered	23	VC_284_0	23	0.6936	1	0.6936	7	2	1	1
Erwinia~phage~Derbicus	Caudovirales	Myoviridae	Derbicusvirus	299_0	Clustered	4	VC_299_0	4	0.1436	0.999981	0.1436	1	1	1	1
Erwinia~phage~ENT90	Caudovirales	Myoviridae	Entnonagintavirus	108_0	Clustered	44	VC_108_0	44	0.8526	1	0.8526	14	1	1	1
Erwinia~phage~Ea35-70	Caudovirales	Myoviridae	Agrican357virus	300_0	Clustered	6	VC_300_0	6	0.4316	1	0.4316	2	1	1	1
Erwinia~phage~Ea9-2	Caudovirales	Podoviridae	Ea92virus	7_0	Clustered	20	VC_7_0	20	0.5726	1	0.5726	7	1	1	0.8316
Erwinia~phage~EtG	Caudovirales	Myoviridae	Eganvirus	108_0	Clustered	44	VC_108_0	44	0.8526	1	0.8526	14	1	1	1
Erwinia~phage~FE44	Caudovirales	Autographiviridae	Berlinvirus	276_0	Clustered	59	VC_276_0	59	0.7562	1	0.7562	11	2	1	1
Erwinia~phage~Faunus	Caudovirales	Chaseviridae	Faunusvirus	94_0	Clustered	11	VC_94_0	11	0.8494	1	0.8494	5	2	1	1
Erwinia~phage~Hena1	Caudovirales	Myoviridae	Unassigned	68_0	Clustered	2	VC_68_0	2	0.0337	0.954381	0.0322	1	1	1	1
Erwinia~phage~Machina	Caudovirales	Myoviridae	Machinavirus	299_3	Clustered	2	VC_299_3	2	0.0414	0.907581	0.0376	1	1	1	1
Erwinia~phage~Wellington	Caudovirales	Myoviridae	Wellingtonvirus	299_1	Clustered	2	VC_299_1	2	0.0421	0.903388	0.0381	2	1	1	1
Erwinia~phage~pEp_SNUABM_01	Caudovirales	Myoviridae	Unassigned	68_0	Clustered	2	VC_68_0	2	0.0337	0.954381	0.0322	1	1	1	1
Erwinia~phage~phiEa100	Caudovirales	Autographiviridae	Eracentumvirus	284_0	Clustered	23	VC_284_0	23	0.6936	1	0.6936	7	2	1	1
Erwinia~phage~phiEa104	Caudovirales	Myoviridae	Ea214virus	117_0	Clustered	3	VC_117_0	3	0.0893	0.99825	0.0891	1	1	1	1
Erwinia~phage~phiEa21-4	Caudovirales	Myoviridae	Ea214virus	117_0	Clustered	3	VC_117_0	3	0.0893	0.99825	0.0891	1	1	1	1
Erwinia~phage~phiEa2809	Caudovirales	Ackermannviridae	Unassigned	33_4	Clustered	2	VC_33_4	2	0.0102	0.955808	0.0098	1	1	1	1
Erwinia~phage~phiEaH2	Caudovirales	Myoviridae	Eah2virus	299_2	Clustered	3	VC_299_2	3	0.087	0.991126	0.0862	2	1	1	1
Erwinia~phage~phiEaP-8	Caudovirales	Podoviridae	Johnsonvirus	7_0	Clustered	20	VC_7_0	20	0.5726	1	0.5726	7	1	1	0.8316
Erwinia~phage~phiEt88	Caudovirales	Myoviridae	Unassigned	307_0	Clustered	2	VC_307_0	2	0.0909	0.859291	0.0781	1	1	1	1
Erwinia~phage~vB_Eam-MM7	Caudovirales	Myoviridae	Ea214virus	117_0	Clustered	3	VC_117_0	3	0.0893	0.99825	0.0891	1	1	1	1
Erwinia~phage~vB_EamM-Bue1	Caudovirales	Ackermannviridae	Unassigned	33_4	Clustered	2	VC_33_4	2	0.0102	0.955808	0.0098	1	1	1	1
Erwinia~phage~vB_EamM-Y2	Caudovirales	Chaseviridae	Loessnervirus	94_0	Clustered	11	VC_94_0	11	0.8494	1	0.8494	5	2	1	1
Erwinia~phage~vB_EamM_Alexandra	Caudovirales	Myoviridae	Alexandravirus	318_1	Clustered	3	VC_318_1	3	0.2219	0.987345	0.2191	2	1	1	1
Erwinia~phage~vB_EamM_Asesino	Caudovirales	Myoviridae	Eah2virus	299_2	Clustered	3	VC_299_2	3	0.087	0.991126	0.0862	2	1	1	1
Erwinia~phage~vB_EamM_Caitlin	Caudovirales	Myoviridae	Machinavirus	299_4	Clustered	2	VC_299_4	2	0.0415	0.905563	0.0376	1	1	1	1
Erwinia~phage~vB_EamM_ChrisDB	Caudovirales	Myoviridae	Machinavirus	299_4	Clustered	2	VC_299_4	2	0.0415	0.905563	0.0376	1	1	1	1
Erwinia~phage~vB_EamM_Deimos-Minion	Caudovirales	Myoviridae	Agrican357virus	300_0	Clustered	6	VC_300_0	6	0.4316	1	0.4316	2	1	1	1
Erwinia~phage~vB_EamM_Desertfox	Caudovirales	Myoviridae	Agricanvirus	300_0	Clustered	6	VC_300_0	6	0.4316	1	0.4316	2	1	1	1
Erwinia~phage~vB_EamM_EarlPhillipIV	Caudovirales	Myoviridae	Derbicusvirus	299_0	Clustered	4	VC_299_0	4	0.1436	0.999981	0.1436	1	1	1	1
Erwinia~phage~vB_EamM_Huxley	Caudovirales	Myoviridae	Machinavirus	299_3	Clustered	2	VC_299_3	2	0.0414	0.907581	0.0376	1	1	1	1
Erwinia~phage~vB_EamM_Kwan	Caudovirales	Myoviridae	Unassigned	299_1	Clustered	2	VC_299_1	2	0.0421	0.903388	0.0381	2	1	1	1
Erwinia~phage~vB_EamM_Phobos	Caudovirales	Myoviridae	Derbicusvirus	299_0	Clustered	4	VC_299_0	4	0.1436	0.999981	0.1436	1	1	1	1
Erwinia~phage~vB_EamM_RAY	Caudovirales	Myoviridae	Agrican357virus	300_0	Clustered	6	VC_300_0	6	0.4316	1	0.4316	2	1	1	1
Erwinia~phage~vB_EamM_RisingSun	Caudovirales	Myoviridae	Risingsunvirus	298_1	Clustered	2	VC_298_1	2	0.0567	0.953791	0.0541	2	1	1	1
Erwinia~phage~vB_EamM_Simmy50	Caudovirales	Myoviridae	Agrican357virus	300_0	Clustered	6	VC_300_0	6	0.4316	1	0.4316	2	1	1	1
Erwinia~phage~vB_EamM_Special~G	Caudovirales	Myoviridae	Agrican357virus	300_0	Clustered	6	VC_300_0	6	0.4316	1	0.4316	2	1	1	1
Erwinia~phage~vB_EamM_Y3	Caudovirales	Myoviridae	Sasquatchvirus	318_1	Clustered	3	VC_318_1	3	0.2219	0.987345	0.2191	2	1	1	1
Erwinia~phage~vB_EamM_Yoloswag	Caudovirales	Myoviridae	Yoloswagvirus	318_2	Clustered/Singleton	1	VC_318_2	1	0	1	0	1	1	1	1
Erwinia~phage~vB_EamP-L1	Caudovirales	Autographiviridae	Elunavirus	276_0	Clustered	59	VC_276_0	59	0.7562	1	0.7562	11	2	1	1
Erwinia~phage~vB_EamP-S2	Caudovirales	Autographiviridae	Eracentumvirus	284_0	Clustered	23	VC_284_0	23	0.6936	1	0.6936	7	2	1	1
Erwinia~phage~vB_EamP_Frozen	Caudovirales	Podoviridae	Ea92virus	7_0	Clustered	20	VC_7_0	20	0.5726	1	0.5726	7	1	1	0.8316
Erwinia~phage~vB_EhrS_49	Caudovirales	Siphoviridae	Feofaniavirus	101_0	Clustered	2	VC_101_0	2	0.1191	0.954394	0.1137	1	1	1	1
Erwinia~phage~vB_EhrS_59	Caudovirales	Siphoviridae	Feofaniavirus	101_0	Clustered	2	VC_101_0	2	0.1191	0.954394	0.1137	1	1	1	1
Escherichia~Stx1~converting~phage	Caudovirales	Podoviridae	Traversvirus	253_0	Clustered	2	VC_253_0	2	0.0676	0.955168	0.0646	2	1	1	1
Escherichia~coli~O157~typing~phage~3	Caudovirales	Myoviridae	Mosigvirus	41_0	Clustered	9	VC_41_0	9	0.0681	1	0.0681	2	1	1	1
Escherichia~coli~O157~typing~phage~6	Caudovirales	Myoviridae	Mosigvirus	41_0	Clustered	9	VC_41_0	9	0.0681	1	0.0681	2	1	1	1
Escherichia~phage~121Q	Caudovirales	Myoviridae	Asteriusvirus	114_4	Clustered	2	VC_114_4	2	0.0908	0.920072	0.0835	1	1	1	1
Escherichia~phage~172-1	Caudovirales	Podoviridae	Phieco32virus	84_0	Clustered	6	VC_84_0	6	0.6757	1	0.6757	1	1	1	1
Escherichia~phage~186	Caudovirales	Myoviridae	P2virus	108_0	Clustered	44	VC_108_0	44	0.8526	1	0.8526	14	1	1	1
Escherichia~phage~4MG	Caudovirales	Myoviridae	Se1virus	68_3	Clustered	2	VC_68_3	2	0.0309	0.921267	0.0284	1	1	1	1
Escherichia~phage~64795_ec1	Caudovirales	Autographiviridae	Teseptimavirus	276_0	Clustered	59	VC_276_0	59	0.7562	1	0.7562	11	2	1	1
Escherichia~phage~933W	Caudovirales	Podoviridae	Nona33virus	253_1	Clustered	14	VC_253_1	14	0.5724	1	0.5724	5	1	1	0.8901
Escherichia~phage~ADB-2	Caudovirales	Siphoviridae	T1virus	102_0	Clustered	21	VC_102_0	21	0.3686	1	0.3686	6	2	1	0.9381
Escherichia~phage~APCEc01	Caudovirales	Myoviridae	Mosigvirus	41_0	Clustered	9	VC_41_0	9	0.0681	1	0.0681	2	1	1	1
Escherichia~phage~AR1	Caudovirales	Myoviridae	T4virus	41_6	Clustered	32	VC_41_6	32	0.3634	1	0.3634	3	1	1	0.996
Escherichia~phage~Av-05	Caudovirales	Myoviridae	Avunavirus	68_4	Clustered/Singleton	1	VC_68_4	1	0	1	0	1	1	1	1
Escherichia~phage~Bp4	Caudovirales	Podoviridae	G7cvirus	7_0	Clustered	20	VC_7_0	20	0.5726	1	0.5726	7	1	1	0.8316
Escherichia~phage~C130_2	Caudovirales	Podoviridae	Giessenvirus	220_0	Clustered	6	VC_220_0	6	0.6777	1	0.6777	4	2	1	1
Escherichia~phage~C5	Caudovirales	Autographiviridae	Teseptimavirus	276_0	Clustered	59	VC_276_0	59	0.7562	1	0.7562	11	2	1	1
Escherichia~phage~CAjan	Caudovirales	Siphoviridae	Seuratvirus	3_0	Clustered	3	VC_3_0	3	0.2414	0.998194	0.241	1	1	1	1
Escherichia~phage~CICC~80001	Caudovirales	Autographiviridae	Teseptimavirus	276_0	Clustered	59	VC_276_0	59	0.7562	1	0.7562	11	2	1	1
Escherichia~phage~D108	Caudovirales	Myoviridae	Muvirus	247_0	Clustered	3	VC_247_0	3	0.7049	0.996636	0.7025	1	1	1	1
Escherichia~phage~EC1-UPM	Caudovirales	Podoviridae	G7cvirus	7_0	Clustered	20	VC_7_0	20	0.5726	1	0.5726	7	1	1	0.8316
Escherichia~phage~EC6	Caudovirales	Myoviridae	Felixo1virus	20_0	Clustered	25	VC_20_0	25	0.8985	1	0.8985	5	1	1	0.9933
Escherichia~phage~ECA2	Caudovirales	Autographiviridae	Teetrevirus	276_0	Clustered	59	VC_276_0	59	0.7562	1	0.7562	11	2	1	1
Escherichia~phage~ECBP1	Caudovirales	Podoviridae	G7cvirus	7_0	Clustered	20	VC_7_0	20	0.5726	1	0.5726	7	1	1	0.8316
Escherichia~phage~ECBP2	Caudovirales	Podoviridae	Phieco32virus	84_0	Clustered	6	VC_84_0	6	0.6757	1	0.6757	1	1	1	1
Escherichia~phage~ECD7	Caudovirales	Myoviridae	Krischvirus	43_0	Clustered	5	VC_43_0	5	0.1237	1	0.1237	2	1	1	1
Escherichia~phage~ECML-134	Caudovirales	Myoviridae	T4virus	41_6	Clustered	32	VC_41_6	32	0.3634	1	0.3634	3	1	1	0.996
Escherichia~phage~ECML-4	Caudovirales	Ackermannviridae	Vi1virus	33_1	Clustered	37	VC_33_1	37	0.4663	1	0.4663	3	1	1	1
Escherichia~phage~EG1	Caudovirales	Autographiviridae	Teseptimavirus	276_0	Clustered	59	VC_276_0	59	0.7562	1	0.7562	11	2	1	1
Escherichia~phage~EK99P-1	Caudovirales	Siphoviridae	Hk578virus	306_0	Clustered	10	VC_306_0	10	0.6834	1	0.6834	2	1	1	1
Escherichia~phage~EP75	Caudovirales	Ackermannviridae	Kuttervirus	33_1	Clustered	37	VC_33_1	37	0.4663	1	0.4663	3	1	1	1
Escherichia~phage~ESCO13	Caudovirales	Myoviridae	Phapecoctavirus	69_0	Clustered	5	VC_69_0	5	0.371	1	0.371	1	1	1	1
Escherichia~phage~ESCO5	Caudovirales	Myoviridae	Phapecoctavirus	69_0	Clustered	5	VC_69_0	5	0.371	1	0.371	1	1	1	1
Escherichia~phage~Ebrios	Caudovirales	Autographiviridae	Teseptimavirus	276_0	Clustered	59	VC_276_0	59	0.7562	1	0.7562	11	2	1	1
Escherichia~phage~Eco_BIFF	Caudovirales	Drexlerviridae	Tunavirus	102_0	Clustered	21	VC_102_0	21	0.3686	1	0.3686	6	2	1	0.9381
Escherichia~phage~Envy	Caudovirales	Siphoviridae	Dhillonvirus	306_0	Clustered	10	VC_306_0	10	0.6834	1	0.6834	2	1	1	1
Escherichia~phage~FEC14	Caudovirales	Ackermannviridae	Kuttervirus	33_1	Clustered	37	VC_33_1	37	0.4663	1	0.4663	3	1	1	1
Escherichia~phage~Gluttony	Caudovirales	Siphoviridae	Dhillonvirus	306_0	Clustered	10	VC_306_0	10	0.6834	1	0.6834	2	1	1	1
Escherichia~phage~HK446	Caudovirales	Siphoviridae	Hk97virus	239_0	Clustered	13	VC_239_0	13	0.412	1	0.412	2	1	1	1
Escherichia~phage~HK542	Caudovirales	Siphoviridae	Hk97virus	239_0	Clustered	13	VC_239_0	13	0.412	1	0.412	2	1	1	1
Escherichia~phage~HK544	Caudovirales	Siphoviridae	Hk97virus	239_0	Clustered	13	VC_239_0	13	0.412	1	0.412	2	1	1	1
Escherichia~phage~HK578	Caudovirales	Siphoviridae	Hk578virus	306_0	Clustered	10	VC_306_0	10	0.6834	1	0.6834	2	1	1	1
Escherichia~phage~HK633	Caudovirales	Siphoviridae	Hk97virus	239_0	Clustered	13	VC_239_0	13	0.412	1	0.412	2	1	1	1
Escherichia~phage~HK75	Caudovirales	Siphoviridae	Hk97virus	239_0	Clustered	13	VC_239_0	13	0.412	1	0.412	2	1	1	1
Escherichia~phage~HY01	Caudovirales	Myoviridae	T4virus	41_6	Clustered	32	VC_41_6	32	0.3634	1	0.3634	3	1	1	0.996
Escherichia~phage~HY02	Caudovirales	Myoviridae	Felixo1virus	20_0	Clustered	25	VC_20_0	25	0.8985	1	0.8985	5	1	1	0.9933
Escherichia~phage~HY03	Caudovirales	Myoviridae	Tequatrovirus	41_6	Clustered	32	VC_41_6	32	0.3634	1	0.3634	3	1	1	0.996
Escherichia~phage~HZ2R8	Caudovirales	Autographiviridae	Teseptimavirus	276_0	Clustered	59	VC_276_0	59	0.7562	1	0.7562	11	2	1	1
Escherichia~phage~HZP2	Caudovirales	Autographiviridae	Teseptimavirus	276_0	Clustered	59	VC_276_0	59	0.7562	1	0.7562	11	2	1	1
Escherichia~phage~ID21	Petitvirales	Microviridae	Alpha3microvirus	338_0	Clustered	11	VC_338_0	11	0.6947	1	0.6947	2	1	1	1
Escherichia~phage~ID32	Petitvirales	Microviridae	Alpha3microvirus	338_0	Clustered	11	VC_338_0	11	0.6947	1	0.6947	2	1	1	1
Escherichia~phage~ID62	Petitvirales	Microviridae	Alpha3microvirus	338_0	Clustered	11	VC_338_0	11	0.6947	1	0.6947	2	1	1	1
Escherichia~phage~IME11	Caudovirales	Podoviridae	G7cvirus	7_0	Clustered	20	VC_7_0	20	0.5726	1	0.5726	7	1	1	0.8316
Escherichia~phage~IMM-002	Caudovirales	Autographiviridae	Kayfunavirus	275_0	Clustered	19	VC_275_0	19	0.6522	1	0.6522	3	1	1	1
Escherichia~phage~JH2	Caudovirales	Myoviridae	Felixo1virus	20_0	Clustered	25	VC_20_0	25	0.8985	1	0.8985	5	1	1	0.9933
Escherichia~phage~JMPW1	Caudovirales	Siphoviridae	T1virus	102_0	Clustered	21	VC_102_0	21	0.3686	1	0.3686	6	2	1	0.9381
Escherichia~phage~JMPW2	Caudovirales	Siphoviridae	T1virus	102_0	Clustered	21	VC_102_0	21	0.3686	1	0.3686	6	2	1	0.9381
Escherichia~phage~JS10	Caudovirales	Myoviridae	Js98virus	41_1	Clustered	8	VC_41_1	8	0.0692	1	0.0692	2	1	1	1
Escherichia~phage~JS98	Caudovirales	Myoviridae	Js98virus	41_1	Clustered	8	VC_41_1	8	0.0692	1	0.0692	2	1	1	1
Escherichia~phage~JSE	Caudovirales	Myoviridae	Rb49virus	43_0	Clustered	5	VC_43_0	5	0.1237	1	0.1237	2	1	1	1
Escherichia~phage~K1-dep(1)	Caudovirales	Siphoviridae	K1gvirus	105_0	Clustered	24	VC_105_0	24	0.856	1	0.856	5	1	1	1
Escherichia~phage~K1-dep(4)	Caudovirales	Siphoviridae	K1gvirus	105_0	Clustered	24	VC_105_0	24	0.856	1	0.856	5	1	1	1
Escherichia~phage~K1-ind(2)	Caudovirales	Siphoviridae	K1gvirus	105_0	Clustered	24	VC_105_0	24	0.856	1	0.856	5	1	1	1
Escherichia~phage~K1ind1	Caudovirales	Siphoviridae	K1gvirus	105_0	Clustered	24	VC_105_0	24	0.856	1	0.856	5	1	1	1
Escherichia~phage~K30	Caudovirales	Podoviridae	Kp32virus	279_0	Clustered	22	VC_279_0	22	0.7193	1	0.7193	2	2	1	1
Escherichia~phage~KBNP1711	Caudovirales	Podoviridae	Phieco32virus	84_0	Clustered	6	VC_84_0	6	0.6757	1	0.6757	1	1	1	1
Escherichia~phage~LL11	Caudovirales	Autographiviridae	Vectrevirus	284_0	Clustered	23	VC_284_0	23	0.6936	1	0.6936	7	2	1	1
Escherichia~phage~LL2	Caudovirales	Autographiviridae	Teetrevirus	276_0	Clustered	59	VC_276_0	59	0.7562	1	0.7562	11	2	1	1
Escherichia~phage~LL5	Caudovirales	Drexlerviridae	Tlsvirus	102_1	Clustered	13	VC_102_1	13	0.2398	1	0.2398	3	2	1	0.9744
Escherichia~phage~LM33_P1	Caudovirales	Autographiviridae	Kayfunavirus	275_0	Clustered	19	VC_275_0	19	0.6522	1	0.6522	3	1	1	1
Escherichia~phage~Lidtsur	Caudovirales	Autographiviridae	Bonnellvirus	77_0	Clustered	3	VC_77_0	3	0.1747	0.99847	0.1745	3	2	1	1
Escherichia~phage~Lw1	Caudovirales	Myoviridae	Unassigned	42_1	Clustered	10	VC_42_1	10	0.2886	1	0.2886	1	1	1	1
Escherichia~phage~MX01	Caudovirales	Myoviridae	Dhakavirus	41_1	Clustered	8	VC_41_1	8	0.0692	1	0.0692	2	1	1	1
Escherichia~phage~Mangalitsa	Caudovirales	Chaseviridae	Carltongylesvirus	94_0	Clustered	11	VC_94_0	11	0.8494	1	0.8494	5	2	1	1
Escherichia~phage~Min27	Caudovirales	Podoviridae	Nona33virus	253_1	Clustered	14	VC_253_1	14	0.5724	1	0.5724	5	1	1	0.8901
Escherichia~phage~Minorna	Caudovirales	Autographiviridae	Drulisvirus	314_0	Clustered	21	VC_314_0	21	0.7496	1	0.7496	3	2	1	1
Escherichia~phage~Mu	Caudovirales	Myoviridae	Muvirus	247_0	Clustered	3	VC_247_0	3	0.7049	0.996636	0.7025	1	1	1	1
Escherichia~phage~N30	Caudovirales	Autographiviridae	Teseptimavirus	276_0	Clustered	59	VC_276_0	59	0.7562	1	0.7562	11	2	1	1
Escherichia~phage~NC28	Petitvirales	Microviridae	Alpha3microvirus	338_0	Clustered	11	VC_338_0	11	0.6947	1	0.6947	2	1	1	1
Escherichia~phage~NC29	Petitvirales	Microviridae	Alpha3microvirus	338_0	Clustered	11	VC_338_0	11	0.6947	1	0.6947	2	1	1	1
Escherichia~phage~NC35	Petitvirales	Microviridae	Alpha3microvirus	338_0	Clustered	11	VC_338_0	11	0.6947	1	0.6947	2	1	1	1
Escherichia~phage~NJ01	Caudovirales	Podoviridae	Phieco32virus	84_0	Clustered	6	VC_84_0	6	0.6757	1	0.6757	1	1	1	1
Escherichia~phage~P13374	Caudovirales	Podoviridae	Oslovirus	253_1	Clustered	14	VC_253_1	14	0.5724	1	0.5724	5	1	1	0.8901
Escherichia~phage~P483	Caudovirales	Autographiviridae	Berlinvirus	276_0	Clustered	59	VC_276_0	59	0.7562	1	0.7562	11	2	1	1
Escherichia~phage~P694	Caudovirales	Autographiviridae	Berlinvirus	276_0	Clustered	59	VC_276_0	59	0.7562	1	0.7562	11	2	1	1
Escherichia~phage~PA2	Caudovirales	Podoviridae	Tl2011virus	253_1	Clustered	14	VC_253_1	14	0.5724	1	0.5724	5	1	1	0.8901
Escherichia~phage~PA28	Caudovirales	Podoviridae	Nona33virus	253_1	Clustered	14	VC_253_1	14	0.5724	1	0.5724	5	1	1	0.8901
Escherichia~phage~PBECO4	Caudovirales	Myoviridae	Asteriusvirus	114_4	Clustered	2	VC_114_4	2	0.0908	0.920072	0.0835	1	1	1	1
Escherichia~phage~PE3-1	Caudovirales	Autographiviridae	Kayfunavirus	275_0	Clustered	19	VC_275_0	19	0.6522	1	0.6522	3	1	1	1
Escherichia~phage~PGT2	Caudovirales	Autographiviridae	Ermolevavirus	76_0	Clustered	19	VC_76_0	19	0.4268	1	0.4268	14	1	1	1
Escherichia~phage~PhaxI	Caudovirales	Ackermannviridae	Cba120virus	33_1	Clustered	37	VC_33_1	37	0.4663	1	0.4663	3	1	1	1
Escherichia~phage~Phi1	Caudovirales	Myoviridae	Rb49virus	43_0	Clustered	5	VC_43_0	5	0.1237	1	0.1237	2	1	1	1
Escherichia~phage~Pollock	Caudovirales	Podoviridae	Sp58virus	11_0	Clustered	5	VC_11_0	5	0.2538	1	0.2538	2	1	1	1
Escherichia~phage~QL01	Caudovirales	Myoviridae	Js98virus	41_1	Clustered	8	VC_41_1	8	0.0692	1	0.0692	2	1	1	1
Escherichia~phage~RB3	Caudovirales	Myoviridae	T4virus	41_6	Clustered	32	VC_41_6	32	0.3634	1	0.3634	3	1	1	0.996
Escherichia~phage~RB49	Caudovirales	Myoviridae	Rb49virus	43_0	Clustered	5	VC_43_0	5	0.1237	1	0.1237	2	1	1	1
Escherichia~phage~RB69	Caudovirales	Myoviridae	Rb69virus	41_0	Clustered	9	VC_41_0	9	0.0681	1	0.0681	2	1	1	1
Escherichia~phage~RCS47	Caudovirales	Myoviridae	Punavirus	352_0	Clustered	3	VC_352_0	3	0.9969	0.814453	0.8119	2	1	1	1
Escherichia~phage~SRT7	Caudovirales	Autographiviridae	Foetvirus	276_0	Clustered	59	VC_276_0	59	0.7562	1	0.7562	11	2	1	1
Escherichia~phage~SRT8	Caudovirales	Drexlerviridae	Sertoctavirus	102_0	Clustered	21	VC_102_0	21	0.3686	1	0.3686	6	2	1	0.9381
Escherichia~phage~ST0	Caudovirales	Myoviridae	Mosigvirus	41_0	Clustered	9	VC_41_0	9	0.0681	1	0.0681	2	1	1	1
Escherichia~phage~ST31	Caudovirales	Autographiviridae	Kayfunavirus	275_0	Clustered	19	VC_275_0	19	0.6522	1	0.6522	3	1	1	1
Escherichia~phage~ST32	Caudovirales	Chaseviridae	Carltongylesvirus	94_0	Clustered	11	VC_94_0	11	0.8494	1	0.8494	5	2	1	1
Escherichia~phage~SUSP1	Caudovirales	Myoviridae	Suspvirus	20_0	Clustered	25	VC_20_0	25	0.8985	1	0.8985	5	1	1	0.9933
Escherichia~phage~SUSP2	Caudovirales	Myoviridae	Suspvirus	20_0	Clustered	25	VC_20_0	25	0.8985	1	0.8985	5	1	1	0.9933
Escherichia~phage~Seurat	Caudovirales	Siphoviridae	Seuratvirus	3_0	Clustered	3	VC_3_0	3	0.2414	0.998194	0.241	1	1	1	1
Escherichia~phage~Skarpretter	Caudovirales	Podoviridae	Skarprettervirus	220_0	Clustered	6	VC_220_0	6	0.6777	1	0.6777	4	2	1	1
Escherichia~phage~Sortsne	Caudovirales	Podoviridae	Sortsnevirus	220_0	Clustered	6	VC_220_0	6	0.6777	1	0.6777	4	2	1	1
Escherichia~phage~St-1	Petitvirales	Microviridae	Alpha3microvirus	338_0	Clustered	11	VC_338_0	11	0.6947	1	0.6947	2	1	1	1
Escherichia~phage~Stx2~II	Caudovirales	Podoviridae	Nona33virus	253_0	Clustered	2	VC_253_0	2	0.0676	0.955168	0.0646	2	1	1	1
Escherichia~phage~T7	Caudovirales	Podoviridae	T7virus	276_0	Clustered	59	VC_276_0	59	0.7562	1	0.7562	11	2	1	1
Escherichia~phage~TL-2011b	Caudovirales	Podoviridae	Uetakevirus	226_0	Clustered	5	VC_226_0	5	0.6977	1	0.6977	2	1	1	1
Escherichia~phage~TL-2011c	Caudovirales	Podoviridae	Tl2011virus	253_1	Clustered	14	VC_253_1	14	0.5724	1	0.5724	5	1	1	0.8901
Escherichia~phage~UFV-AREG1	Caudovirales	Myoviridae	Tequatrovirus	41_6	Clustered	32	VC_41_6	32	0.3634	1	0.3634	3	1	1	0.996
Escherichia~phage~VB_EcoS-Golestan	Caudovirales	Siphoviridae	Kagunavirus	105_0	Clustered	24	VC_105_0	24	0.856	1	0.856	5	1	1	1
Escherichia~phage~WA45	Petitvirales	Microviridae	Alpha3microvirus	338_0	Clustered	11	VC_338_0	11	0.6947	1	0.6947	2	1	1	1
Escherichia~phage~WG01	Caudovirales	Myoviridae	Dhakavirus	41_1	Clustered	8	VC_41_1	8	0.0692	1	0.0692	2	1	1	1
Escherichia~phage~Wphi	Caudovirales	Myoviridae	P2virus	108_0	Clustered	44	VC_108_0	44	0.8526	1	0.8526	14	1	1	1
Escherichia~phage~YD-2008.s	Caudovirales	Siphoviridae	Hk578virus	306_0	Clustered	10	VC_306_0	10	0.6834	1	0.6834	2	1	1	1
Escherichia~phage~YZ1	Caudovirales	Autographiviridae	Kayfunavirus	275_0	Clustered	19	VC_275_0	19	0.6522	1	0.6522	3	1	1	1
Escherichia~phage~ZG49	Caudovirales	Autographiviridae	Kayfunavirus	275_0	Clustered	19	VC_275_0	19	0.6522	1	0.6522	3	1	1	1
Escherichia~phage~alpha3	Petitvirales	Microviridae	Alpha3microvirus	338_0	Clustered	11	VC_338_0	11	0.6947	1	0.6947	2	1	1	1
Escherichia~phage~flopper	Caudovirales	Chaseviridae	Carltongylesvirus	94_0	Clustered	11	VC_94_0	11	0.8494	1	0.8494	5	2	1	1
Escherichia~phage~ime09	Caudovirales	Myoviridae	T4virus	41_6	Clustered	32	VC_41_6	32	0.3634	1	0.3634	3	1	1	0.996
Escherichia~phage~mEp234	Caudovirales	Siphoviridae	Hk97virus	239_0	Clustered	13	VC_239_0	13	0.412	1	0.412	2	1	1	1
Escherichia~phage~mEpX1	Caudovirales	Siphoviridae	Hk97virus	239_0	Clustered	13	VC_239_0	13	0.412	1	0.412	2	1	1	1
Escherichia~phage~mEpX2	Caudovirales	Siphoviridae	Hk97virus	239_0	Clustered	13	VC_239_0	13	0.412	1	0.412	2	1	1	1
Escherichia~phage~phAPEC8	Caudovirales	Myoviridae	Phapecoctavirus	69_0	Clustered	5	VC_69_0	5	0.371	1	0.371	1	1	1	1
Escherichia~phage~phi191	Caudovirales	Podoviridae	Tl2011virus	253_1	Clustered	14	VC_253_1	14	0.5724	1	0.5724	5	1	1	0.8901
Escherichia~phage~phiK	Petitvirales	Microviridae	Alpha3microvirus	338_0	Clustered	11	VC_338_0	11	0.6947	1	0.6947	2	1	1	1
Escherichia~phage~phiKT	Caudovirales	Autographiviridae	Ermolevavirus	76_0	Clustered	19	VC_76_0	19	0.4268	1	0.4268	14	1	1	1
Escherichia~phage~phiV10	Caudovirales	Podoviridae	Epsilon15virus	226_0	Clustered	5	VC_226_0	5	0.6977	1	0.6977	2	1	1	1
Escherichia~phage~pro147	Caudovirales	Myoviridae	Peduovirus	108_0	Clustered	44	VC_108_0	44	0.8526	1	0.8526	14	1	1	1
Escherichia~phage~pro483	Caudovirales	Myoviridae	Peduovirus	108_0	Clustered	44	VC_108_0	44	0.8526	1	0.8526	14	1	1	1
Escherichia~phage~saus132	Caudovirales	Demerecviridae	Epseptimavirus	90_0	Clustered	32	VC_90_0	32	0.5221	1	0.5221	2	2	1	0.998
Escherichia~phage~slur01	Caudovirales	Siphoviridae	Seuratvirus	3_0	Clustered	3	VC_3_0	3	0.2414	0.998194	0.241	1	1	1	1
Escherichia~phage~slur02	Caudovirales	Myoviridae	Tequatrovirus	41_6	Clustered	32	VC_41_6	32	0.3634	1	0.3634	3	1	1	0.996
Escherichia~phage~slur03	Caudovirales	Myoviridae	Tequatrovirus	41_6	Clustered	32	VC_41_6	32	0.3634	1	0.3634	3	1	1	0.996
Escherichia~phage~slur04	Caudovirales	Myoviridae	Tequatrovirus	41_6	Clustered	32	VC_41_6	32	0.3634	1	0.3634	3	1	1	0.996
Escherichia~phage~slur05	Caudovirales	Siphoviridae	Dhillonvirus	306_0	Clustered	10	VC_306_0	10	0.6834	1	0.6834	2	1	1	1
Escherichia~phage~slur07	Caudovirales	Myoviridae	Tequatrovirus	41_6	Clustered	32	VC_41_6	32	0.3634	1	0.3634	3	1	1	0.996
Escherichia~phage~slur14	Caudovirales	Myoviridae	Tequatrovirus	41_6	Clustered	32	VC_41_6	32	0.3634	1	0.3634	3	1	1	0.996
Escherichia~phage~vB_EcoM-12474III	Caudovirales	Myoviridae	Peduovirus	108_0	Clustered	44	VC_108_0	44	0.8526	1	0.8526	14	1	1	1
Escherichia~phage~vB_EcoM-UFV13	Caudovirales	Myoviridae	Tequatrovirus	41_6	Clustered	32	VC_41_6	32	0.3634	1	0.3634	3	1	1	0.996
Escherichia~phage~vB_EcoM-VpaE1	Caudovirales	Myoviridae	Felixo1virus	20_0	Clustered	25	VC_20_0	25	0.8985	1	0.8985	5	1	1	0.9933
Escherichia~phage~vB_EcoM-ep3	Caudovirales	Myoviridae	Cvm10virus	98_0	Clustered	5	VC_98_0	5	0.3776	1	0.3776	2	1	1	1
Escherichia~phage~vB_EcoM_112	Caudovirales	Myoviridae	T4virus	41_6	Clustered	32	VC_41_6	32	0.3634	1	0.3634	3	1	1	0.996
Escherichia~phage~vB_EcoM_ACG-C40	Caudovirales	Myoviridae	T4virus	41_6	Clustered	32	VC_41_6	32	0.3634	1	0.3634	3	1	1	0.996
Escherichia~phage~vB_EcoM_AYO145A	Caudovirales	Myoviridae	Felixo1virus	20_0	Clustered	25	VC_20_0	25	0.8985	1	0.8985	5	1	1	0.9933
Escherichia~phage~vB_EcoM_Alf5	Caudovirales	Myoviridae	Felixounavirus	20_0	Clustered	25	VC_20_0	25	0.8985	1	0.8985	5	1	1	0.9933
Escherichia~phage~vB_EcoM_ECO1230-10	Caudovirales	Myoviridae	Cvm10virus	98_0	Clustered	5	VC_98_0	5	0.3776	1	0.3776	2	1	1	1
Escherichia~phage~vB_EcoM_ECOO78	Caudovirales	Myoviridae	Jilinvirus	98_0	Clustered	5	VC_98_0	5	0.3776	1	0.3776	2	1	1	1
Escherichia~phage~vB_EcoM_Goslar	Caudovirales	Myoviridae	Goslarvirus	302_1	Clustered/Singleton	1	VC_302_1	1	0	1	0	1	1	1	1
Escherichia~phage~vB_EcoM_JS09	Caudovirales	Myoviridae	Rb69virus	41_0	Clustered	9	VC_41_0	9	0.0681	1	0.0681	2	1	1	1
Escherichia~phage~vB_EcoM_KWBSE43-6	Caudovirales	Ackermannviridae	Taipeivirus	33_0	Clustered	8	VC_33_0	8	0.0659	0.996053	0.0657	1	1	1	0.9643
Escherichia~phage~vB_EcoM_PhAPEC2	Caudovirales	Myoviridae	Mosigvirus	41_0	Clustered	9	VC_41_0	9	0.0681	1	0.0681	2	1	1	1
Escherichia~phage~vB_EcoM_Schickermooser	Caudovirales	Myoviridae	Phapecoctavirus	69_0	Clustered	5	VC_69_0	5	0.371	1	0.371	1	1	1	1
Escherichia~phage~vB_EcoM_VR20	Caudovirales	Myoviridae	Sp18virus	41_13	Clustered	5	VC_41_13	5	0.0394	1	0.0394	1	1	1	1
Escherichia~phage~vB_EcoM_VR25	Caudovirales	Myoviridae	Sp18virus	41_13	Clustered	5	VC_41_13	5	0.0394	1	0.0394	1	1	1	1
Escherichia~phage~vB_EcoM_VR26	Caudovirales	Myoviridae	Sp18virus	41_13	Clustered	5	VC_41_13	5	0.0394	1	0.0394	1	1	1	1
Escherichia~phage~vB_EcoM_VR7	Caudovirales	Myoviridae	Sp18virus	41_13	Clustered	5	VC_41_13	5	0.0394	1	0.0394	1	1	1	1
Escherichia~phage~vB_EcoP-Ro45lw	Caudovirales	Autographiviridae	Kayfunavirus	275_0	Clustered	19	VC_275_0	19	0.6522	1	0.6522	3	1	1	1
Escherichia~phage~vB_EcoP_24B	Caudovirales	Podoviridae	Nona33virus	253_1	Clustered	14	VC_253_1	14	0.5724	1	0.5724	5	1	1	0.8901
Escherichia~phage~vB_EcoP_B	Caudovirales	Autographiviridae	Vectrevirus	284_0	Clustered	23	VC_284_0	23	0.6936	1	0.6936	7	2	1	1
Escherichia~phage~vB_EcoP_C	Caudovirales	Autographiviridae	Vectrevirus	284_0	Clustered	23	VC_284_0	23	0.6936	1	0.6936	7	2	1	1
Escherichia~phage~vB_EcoP_F	Caudovirales	Autographiviridae	Kayfunavirus	275_0	Clustered	19	VC_275_0	19	0.6522	1	0.6522	3	1	1	1
Escherichia~phage~vB_EcoP_G7C	Caudovirales	Podoviridae	G7cvirus	7_0	Clustered	20	VC_7_0	20	0.5726	1	0.5726	7	1	1	0.8316
Escherichia~phage~vB_EcoP_GA2A	Caudovirales	Autographiviridae	Kayfunavirus	275_0	Clustered	19	VC_275_0	19	0.6522	1	0.6522	3	1	1	1
Escherichia~phage~vB_EcoP_K	Caudovirales	Autographiviridae	Vectrevirus	284_0	Clustered	23	VC_284_0	23	0.6936	1	0.6936	7	2	1	1
Escherichia~phage~vB_EcoP_PhAPEC5	Caudovirales	Podoviridae	G7cvirus	7_0	Clustered	20	VC_7_0	20	0.5726	1	0.5726	7	1	1	0.8316
Escherichia~phage~vB_EcoP_PhAPEC7	Caudovirales	Podoviridae	G7cvirus	7_0	Clustered	20	VC_7_0	20	0.5726	1	0.5726	7	1	1	0.8316
Escherichia~phage~vB_EcoP_S523	Caudovirales	Autographiviridae	Berlinvirus	276_0	Clustered	59	VC_276_0	59	0.7562	1	0.7562	11	2	1	1
Escherichia~phage~vB_EcoP_SU10	Caudovirales	Podoviridae	Phieco32virus	84_0	Clustered	6	VC_84_0	6	0.6757	1	0.6757	1	1	1	1
Escherichia~phage~vB_EcoS-95	Caudovirales	Drexlerviridae	Warwickvirus	102_1	Clustered	13	VC_102_1	13	0.2398	1	0.2398	3	2	1	0.9744
Escherichia~phage~vB_EcoS_SH2	Caudovirales	Drexlerviridae	Tunavirus	102_0	Clustered	21	VC_102_0	21	0.3686	1	0.3686	6	2	1	0.9381
Escherichia~phage~vB_Eco_swan01	Caudovirales	Drexlerviridae	Warwickvirus	102_1	Clustered	13	VC_102_1	13	0.2398	1	0.2398	3	2	1	0.9744
Escherichia~phage~vb_EcoM-VR5	Caudovirales	Myoviridae	Js98virus	41_1	Clustered	8	VC_41_1	8	0.0692	1	0.0692	2	1	1	1
Escherichia~phage~wV7	Caudovirales	Myoviridae	Tequatrovirus	41_6	Clustered	32	VC_41_6	32	0.3634	1	0.3634	3	1	1	0.996
Escherichia~phage~wV8	Caudovirales	Myoviridae	Felixo1virus	20_0	Clustered	25	VC_20_0	25	0.8985	1	0.8985	5	1	1	0.9933
Escherichia~typing~phage~1	Caudovirales	Myoviridae	Felixo1virus	20_0	Clustered	25	VC_20_0	25	0.8985	1	0.8985	5	1	1	0.9933
Escherichia~virus~AAPEc6	Caudovirales	Autographiviridae	Vectrevirus	284_0	Clustered	23	VC_284_0	23	0.6936	1	0.6936	7	2	1	1
Escherichia~virus~CBA120	Caudovirales	Ackermannviridae	Cba120virus	33_1	Clustered	37	VC_33_1	37	0.4663	1	0.4663	3	1	1	1
Escherichia~virus~EPS7	Caudovirales	Siphoviridae	T5virus	90_0	Clustered	32	VC_90_0	32	0.5221	1	0.5221	2	2	1	0.998
Escherichia~virus~FI	Levivirales	Leviviridae	Allolevivirus	45_0	Clustered	3	VC_45_0	3	0.7433	0.996222	0.7405	1	1	1	1
Escherichia~virus~HK022	Caudovirales	Siphoviridae	Hk97virus	239_0	Clustered	13	VC_239_0	13	0.412	1	0.412	2	1	1	1
Escherichia~virus~HK97	Caudovirales	Siphoviridae	Hk97virus	239_0	Clustered	13	VC_239_0	13	0.412	1	0.412	2	1	1	1
Escherichia~virus~I22	Tubulavirales	Inoviridae	Lineavirus	340_0	Clustered/Singleton	1	VC_340_0	1	0	1	0	1	1	1	1
Escherichia~virus~JL1	Caudovirales	Siphoviridae	Hk578virus	306_0	Clustered	10	VC_306_0	10	0.6834	1	0.6834	2	1	1	1
Escherichia~virus~K1-5	Caudovirales	Podoviridae	Sp6virus	284_0	Clustered	23	VC_284_0	23	0.6936	1	0.6936	7	2	1	1
Escherichia~virus~K1E	Caudovirales	Podoviridae	Sp6virus	284_0	Clustered	23	VC_284_0	23	0.6936	1	0.6936	7	2	1	1
Escherichia~virus~M13	Tubulavirales	Inoviridae	Inovirus	341_0	Clustered	3	VC_341_0	3	0.689	0.963901	0.6641	2	1	1	1
Escherichia~virus~N4	Caudovirales	Podoviridae	N4virus	7_0	Clustered	20	VC_7_0	20	0.5726	1	0.5726	7	1	1	0.8316
Escherichia~virus~P1	Caudovirales	Myoviridae	P1virus	352_0	Clustered	3	VC_352_0	3	0.9969	0.814453	0.8119	2	1	1	1
Escherichia~virus~P2	Caudovirales	Myoviridae	P2virus	108_0	Clustered	44	VC_108_0	44	0.8526	1	0.8526	14	1	1	1
Escherichia~virus~Qbeta	Levivirales	Leviviridae	Allolevivirus	45_0	Clustered	3	VC_45_0	3	0.7433	0.996222	0.7405	1	1	1	1
Escherichia~virus~RB14	Caudovirales	Myoviridae	T4virus	41_6	Clustered	32	VC_41_6	32	0.3634	1	0.3634	3	1	1	0.996
Escherichia~virus~RB16	Caudovirales	Myoviridae	Unassigned	42_1	Clustered	10	VC_42_1	10	0.2886	1	0.2886	1	1	1	1
Escherichia~virus~RB32	Caudovirales	Myoviridae	Unassigned	41_6	Clustered	32	VC_41_6	32	0.3634	1	0.3634	3	1	1	0.996
Escherichia~virus~RB43	Caudovirales	Myoviridae	Unassigned	42_1	Clustered	10	VC_42_1	10	0.2886	1	0.2886	1	1	1	1
Escherichia~virus~SSL2009a	Caudovirales	Siphoviridae	Hk578virus	306_0	Clustered	10	VC_306_0	10	0.6834	1	0.6834	2	1	1	1
Escherichia~virus~T1	Caudovirales	Siphoviridae	T1virus	102_0	Clustered	21	VC_102_0	21	0.3686	1	0.3686	6	2	1	0.9381
Escherichia~virus~T4	Caudovirales	Myoviridae	T4virus	41_6	Clustered	32	VC_41_6	32	0.3634	1	0.3634	3	1	1	0.996
Escherichia~virus~TLS	Caudovirales	Siphoviridae	Tlsvirus	102_1	Clustered	13	VC_102_1	13	0.2398	1	0.2398	3	2	1	0.9744
Escherichia~virus~VEc3	Caudovirales	Autographiviridae	Vectrevirus	284_0	Clustered	23	VC_284_0	23	0.6936	1	0.6936	7	2	1	1
Escherichia~virus~Vec13	Caudovirales	Autographiviridae	Kayfunavirus	275_0	Clustered	19	VC_275_0	19	0.6522	1	0.6522	3	1	1	1
Escherichia~virus~mutPK1A2	Caudovirales	Autographiviridae	Vectrevirus	284_0	Clustered	23	VC_284_0	23	0.6936	1	0.6936	7	2	1	1
Escherichia~virus~phiEco32	Caudovirales	Podoviridae	Phieco32virus	84_0	Clustered	6	VC_84_0	6	0.6757	1	0.6757	1	1	1	1
Faecalibacterium~phage~FP_Epona	Caudovirales	Myoviridae	Eponavirus	223_0	Clustered	5	VC_223_0	5	0.6564	0.687258	0.4511	5	1	1	1
Faecalibacterium~phage~FP_Lagaffe	Caudovirales	Myoviridae	Lagaffevirus	223_0	Clustered	5	VC_223_0	5	0.6564	0.687258	0.4511	5	1	1	1
Faecalibacterium~phage~FP_Lugh	Caudovirales	Siphoviridae	Lughvirus	177_0	Clustered	2	VC_177_0	2	0.0804	0.896402	0.072	2	1	1	1
Faecalibacterium~phage~FP_Mushu	Caudovirales	Myoviridae	Mushuvirus	185_0	Clustered	2	VC_185_0	2	0.0481	0.86925	0.0418	2	1	1	1
Faecalibacterium~phage~FP_Taranis	Caudovirales	Myoviridae	Taranisvirus	223_0	Clustered	5	VC_223_0	5	0.6564	0.687258	0.4511	5	1	1	1
Faecalibacterium~phage~FP_Toutatis	Caudovirales	Myoviridae	Toutatisvirus	223_0	Clustered	5	VC_223_0	5	0.6564	0.687258	0.4511	5	1	1	1
Faecalibacterium~phage~FP_oengus	Caudovirales	Siphoviridae	Oengusvirus	149_0	Clustered/Singleton	1	VC_149_0	1	0	1	0	1	1	1	1
Feng_Q_2015_NC_ERR688506.NODE_1464_21827	Unassigned	Unassigned	Unassigned	354_0	Clustered	2	VC_354_0	2	0.019	0.95611	0.0182	1	1	1	1
Feng_Q_2015_NC_ERR688517.NODE_3_335063	Unassigned	Unassigned	Unassigned	331_4	Clustered	5	VC_331_4	5	0.0206	0.99998	0.0206	1	1	1	0.7
Feng_Q_2015_NC_ERR688517.NODE_40_158718	Unassigned	Unassigned	Unassigned	334_1	Clustered	38	VC_334_1	38	0.4904	1	0.4904	1	1	1	0.7681
Feng_Q_2015_NC_ERR688525.NODE_14_257992	Unassigned	Unassigned	Unassigned	332_0	Clustered	5	VC_332_0	5	0.0341	1	0.0341	1	1	1	1
Feng_Q_2015_NC_ERR688525.NODE_40_157640	Unassigned	Unassigned	Unassigned	328_0	Clustered	35	VC_328_0	35	0.6388	1	0.6388	1	1	1	0.8992
Feng_Q_2015_NC_ERR688525.NODE_47_150203	Unassigned	Unassigned	Unassigned	334_2	Clustered	2	VC_334_2	2	0.0117	0.950842	0.0111	1	1	1	1
Feng_Q_2015_NC_ERR688525.NODE_4_348843	Unassigned	Unassigned	Unassigned	357_7	Clustered	3	VC_357_7	3	0.012	0.979022	0.0118	1	1	1	0.6667
Feng_Q_2015_NC_ERR688525.NODE_79_122797	Unassigned	Unassigned	Unassigned	356_2	Clustered	17	VC_356_2	17	0.1807	1	0.1807	1	1	1	0.9559
Feng_Q_2015_NC_ERR688540.NODE_1021_17892	Unassigned	Unassigned	Unassigned	364_0	Clustered	7	VC_364_0	7	0.1986	0.999999	0.1986	1	1	1	1
Feng_Q_2015_NC_ERR688547.NODE_109_79908	Unassigned	Unassigned	Unassigned	357_4	Clustered	7	VC_357_4	7	0.0732	0.999922	0.0732	1	1	1	0.7619
Feng_Q_2015_NC_ERR688547.NODE_133_70863	Unassigned	Unassigned	Unassigned	331_3	Clustered	32	VC_331_3	32	0.2198	1	0.2198	1	1	1	0.8649
Feng_Q_2015_NC_ERR688547.NODE_88_90759	Unassigned	Unassigned	Unassigned	334_1	Clustered	38	VC_334_1	38	0.4904	1	0.4904	1	1	1	0.7681
Feng_Q_2015_NC_ERR688553.NODE_1530_15294	Unassigned	Unassigned	Unassigned	360_0	Clustered	11	VC_360_0	11	0.0999	1	0.0999	1	1	1	1
Feng_Q_2015_NC_ERR688555.NODE_16_180361	Unassigned	Unassigned	Unassigned	331_13	Clustered	26	VC_331_13	26	0.1628	1	0.1628	1	1	1	0.9908
Feng_Q_2015_NC_ERR688555.NODE_27_145559	Unassigned	Unassigned	Unassigned	329_9	Clustered	10	VC_329_9	10	0.1045	1	0.1045	1	1	1	0.8444
Feng_Q_2015_NC_ERR688555.NODE_95_78185	Unassigned	Unassigned	Unassigned	327_4	Clustered	17	VC_327_4	17	0.2834	1	0.2834	1	1	1	0.9118
Feng_Q_2015_NC_ERR688556.NODE_11_243924	Unassigned	Unassigned	Unassigned	331_14	Clustered	3	VC_331_14	3	0.0106	0.982253	0.0104	1	1	1	1
Feng_Q_2015_NC_ERR688558.NODE_36_162037	Unassigned	Unassigned	Unassigned	331_2	Clustered	4	VC_331_2	4	0.0297	0.999911	0.0297	1	1	1	1
Feng_Q_2015_NC_ERR688558.NODE_46_155326	Unassigned	Unassigned	Unassigned	356_2	Clustered	17	VC_356_2	17	0.1807	1	0.1807	1	1	1	0.9559
Feng_Q_2015_NC_ERR688558.NODE_8_356872	Unassigned	Unassigned	Unassigned	331_7	Clustered/Singleton	1	VC_331_7	1	0	1	0	1	1	1	1
Feng_Q_2015_NC_ERR688559.NODE_137_87077	Unassigned	Unassigned	Unassigned	332_1	Clustered	41	VC_332_1	41	0.4805	1	0.4805	1	1	1	0.8146
Feng_Q_2015_NC_ERR688559.NODE_255_57902	Unassigned	Unassigned	Unassigned	327_4	Clustered	17	VC_327_4	17	0.2834	1	0.2834	1	1	1	0.9118
Feng_Q_2015_NC_ERR688564.NODE_124_96826	Unassigned	Unassigned	Unassigned	333_0	Clustered	22	VC_333_0	22	0.3822	1	0.3822	1	1	1	0.9784
Feng_Q_2015_NC_ERR688564.NODE_1308_21004	Unassigned	Unassigned	Unassigned	362_0	Clustered	6	VC_362_0	6	0.0992	0.999798	0.0992	1	1	1	1
Feng_Q_2015_NC_ERR688564.NODE_132_95137	Unassigned	Unassigned	Unassigned	332_1	Clustered	41	VC_332_1	41	0.4805	1	0.4805	1	1	1	0.8146
Feng_Q_2015_NC_ERR688564.NODE_270_68917	Unassigned	Unassigned	Unassigned	356_3	Clustered	2	VC_356_3	2	0.0102	0.925021	0.0095	1	1	1	1
Feng_Q_2015_NC_ERR688564.NODE_36_168274	Unassigned	Unassigned	Unassigned	329_6	Clustered	8	VC_329_6	8	0.0694	1	0.0694	1	1	1	0.9286
Feng_Q_2015_NC_ERR688567.NODE_103_94083	Unassigned	Unassigned	Unassigned	328_0	Clustered	35	VC_328_0	35	0.6388	1	0.6388	1	1	1	0.8992
Feng_Q_2015_NC_ERR688567.NODE_11_337426	Unassigned	Unassigned	Unassigned	357_7	Clustered	3	VC_357_7	3	0.012	0.979022	0.0118	1	1	1	0.6667
Feng_Q_2015_NC_ERR688567.NODE_33_179828	Unassigned	Unassigned	Unassigned	329_4	Clustered	4	VC_329_4	4	0.0323	0.999981	0.0323	1	1	1	0.6667
Feng_Q_2015_NC_ERR688567.NODE_49_144613	Unassigned	Unassigned	Unassigned	356_2	Clustered	17	VC_356_2	17	0.1807	1	0.1807	1	1	1	0.9559
Feng_Q_2015_NC_ERR688567.NODE_6_356251	Unassigned	Unassigned	Unassigned	334_3	Clustered/Singleton	1	VC_334_3	1	0	1	0	1	1	1	1
Feng_Q_2015_NC_ERR688567.NODE_92_98026	Unassigned	Unassigned	Unassigned	333_0	Clustered	22	VC_333_0	22	0.3822	1	0.3822	1	1	1	0.9784
Feng_Q_2015_NC_ERR688567.NODE_96_97017	Unassigned	Unassigned	Unassigned	332_1	Clustered	41	VC_332_1	41	0.4805	1	0.4805	1	1	1	0.8146
Feng_Q_2015_NC_ERR688569.NODE_24_224744	Unassigned	Unassigned	Unassigned	331_13	Clustered	26	VC_331_13	26	0.1628	1	0.1628	1	1	1	0.9908
Feng_Q_2015_NC_ERR688569.NODE_34_181591	Unassigned	Unassigned	Unassigned	334_1	Clustered	38	VC_334_1	38	0.4904	1	0.4904	1	1	1	0.7681
Feng_Q_2015_NC_ERR688569.NODE_59_138225	Unassigned	Unassigned	Unassigned	329_5	Clustered	17	VC_329_5	17	0.206	1	0.206	1	1	1	0.9412
Feng_Q_2015_NC_ERR688569.NODE_65_130683	Unassigned	Unassigned	Unassigned	328_0	Clustered	35	VC_328_0	35	0.6388	1	0.6388	1	1	1	0.8992
Feng_Q_2015_NC_ERR688580.NODE_71_98157	Unassigned	Unassigned	Unassigned	331_11	Clustered	8	VC_331_11	8	0.0538	1	0.0538	1	1	1	1
Feng_Q_2015_NC_ERR688580.NODE_89_84760	Unassigned	Unassigned	Unassigned	328_0	Clustered	35	VC_328_0	35	0.6388	1	0.6388	1	1	1	0.8992
Feng_Q_2015_NC_ERR688586.NODE_6124_6133	Unassigned	Unassigned	Unassigned	361_0	Clustered	2	VC_361_0	2	0.0183	0.955988	0.0175	1	1	1	1
Feng_Q_2015_NC_ERR688586.NODE_82094_779	Unassigned	Unassigned	Unassigned	375_0	Clustered	3	VC_375_0	3	0.4416	0.95221	0.4205	1	1	1	1
Feng_Q_2015_NC_ERR688589.NODE_26_209350	Unassigned	Unassigned	Unassigned	329_8	Clustered	3	VC_329_8	3	0.0153	0.995169	0.0152	1	1	1	1
Feng_Q_2015_NC_ERR688589.NODE_37_178501	Unassigned	Unassigned	Unassigned	333_0	Clustered	22	VC_333_0	22	0.3822	1	0.3822	1	1	1	0.9784
Feng_Q_2015_NC_ERR688589.NODE_46_157332	Unassigned	Unassigned	Unassigned	331_3	Clustered	32	VC_331_3	32	0.2198	1	0.2198	1	1	1	0.8649
Feng_Q_2015_NC_ERR688589.NODE_52_150807	Unassigned	Unassigned	Unassigned	334_1	Clustered	38	VC_334_1	38	0.4904	1	0.4904	1	1	1	0.7681
Feng_Q_2015_NC_ERR688589.NODE_76_116818	Unassigned	Unassigned	Unassigned	332_1	Clustered	41	VC_332_1	41	0.4805	1	0.4805	1	1	1	0.8146
Feng_Q_2015_NC_ERR688592.NODE_149_84504	Unassigned	Unassigned	Unassigned	331_3	Clustered	32	VC_331_3	32	0.2198	1	0.2198	1	1	1	0.8649
Feng_Q_2015_NC_ERR688593.NODE_117_79004	Unassigned	Unassigned	Unassigned	328_0	Clustered	35	VC_328_0	35	0.6388	1	0.6388	1	1	1	0.8992
Feng_Q_2015_NC_ERR688593.NODE_462_38307	Unassigned	Unassigned	Unassigned	324_0	Clustered	61	VC_324_0	61	0.6933	1	0.6933	1	1	1	1
Feng_Q_2015_NC_ERR688593.NODE_61_106133	Unassigned	Unassigned	Unassigned	356_2	Clustered	17	VC_356_2	17	0.1807	1	0.1807	1	1	1	0.9559
Feng_Q_2015_NC_ERR688604.NODE_185_81020	Unassigned	Unassigned	Unassigned	328_0	Clustered	35	VC_328_0	35	0.6388	1	0.6388	1	1	1	0.8992
Feng_Q_2015_NC_ERR688605.NODE_11_256862	Unassigned	Unassigned	Unassigned	332_0	Clustered	5	VC_332_0	5	0.0341	1	0.0341	1	1	1	1
Feng_Q_2015_NC_ERR688605.NODE_12_251688	Unassigned	Unassigned	Unassigned	356_4	Clustered	21	VC_356_4	21	0.1749	1	0.1749	1	1	1	0.881
Feng_Q_2015_NC_ERR688605.NODE_144_63822	Unassigned	Unassigned	Unassigned	359_0	Clustered	22	VC_359_0	22	0.745	1	0.745	1	1	1	1
Feng_Q_2015_NC_ERR688605.NODE_29_163335	Unassigned	Unassigned	Unassigned	331_3	Clustered	32	VC_331_3	32	0.2198	1	0.2198	1	1	1	0.8649
Feng_Q_2015_NC_ERR688605.NODE_42_133535	Unassigned	Unassigned	Unassigned	329_9	Clustered	10	VC_329_9	10	0.1045	1	0.1045	1	1	1	0.8444
Feng_Q_2015_NC_ERR688610.NODE_14_279815	Unassigned	Unassigned	Unassigned	356_4	Clustered	21	VC_356_4	21	0.1749	1	0.1749	1	1	1	0.881
Feng_Q_2015_NC_ERR688610.NODE_3_496081	Unassigned	Unassigned	Unassigned	331_9	Clustered/Singleton	1	VC_331_9	1	0	1	0	1	1	1	1
Feng_Q_2015_NC_ERR688610.NODE_6_403104	Unassigned	Unassigned	Unassigned	357_8	Clustered/Singleton	1	VC_357_8	1	0	1	0	1	1	1	1
Feng_Q_2015_NC_ERR688611.NODE_169_75697	Unassigned	Unassigned	Unassigned	328_0	Clustered	35	VC_328_0	35	0.6388	1	0.6388	1	1	1	0.8992
Feng_Q_2015_NC_ERR688618.NODE_109_124524	Unassigned	Unassigned	Unassigned	328_0	Clustered	35	VC_328_0	35	0.6388	1	0.6388	1	1	1	0.8992
Feng_Q_2015_NC_ERR688618.NODE_12_352307	Unassigned	Unassigned	Unassigned	329_0	Clustered/Singleton	1	VC_329_0	1	0	1	0	1	1	1	1
Feng_Q_2015_NC_ERR688618.NODE_213_86366	Unassigned	Unassigned	Unassigned	332_1	Clustered	41	VC_332_1	41	0.4805	1	0.4805	1	1	1	0.8146
Feng_Q_2015_NC_ERR688618.NODE_5_518151	Unassigned	Unassigned	Unassigned	331_8	Clustered/Singleton	1	VC_331_8	1	0	1	0	1	1	1	1
Feng_Q_2015_NC_ERR688623.NODE_137_87382	Unassigned	Unassigned	Unassigned	357_2	Clustered	7	VC_357_2	7	0.0563	0.999799	0.0563	1	1	1	1
Feng_Q_2015_NC_ERR688624.NODE_13_239271	Unassigned	Unassigned	Unassigned	356_4	Clustered	21	VC_356_4	21	0.1749	1	0.1749	1	1	1	0.881
Feng_Q_2015_NC_ERR688624.NODE_154_87382	Unassigned	Unassigned	Unassigned	328_0	Clustered	35	VC_328_0	35	0.6388	1	0.6388	1	1	1	0.8992
Feng_Q_2015_NC_ERR688624.NODE_176_83618	Unassigned	Unassigned	Unassigned	333_0	Clustered	22	VC_333_0	22	0.3822	1	0.3822	1	1	1	0.9784
Feng_Q_2015_NC_ERR688624.NODE_178_82922	Unassigned	Unassigned	Unassigned	332_1	Clustered	41	VC_332_1	41	0.4805	1	0.4805	1	1	1	0.8146
Feng_Q_2015_NC_ERR688626.NODE_21_215262	Unassigned	Unassigned	Unassigned	332_0	Clustered	5	VC_332_0	5	0.0341	1	0.0341	1	1	1	1
Feng_Q_2015_NC_ERR688626.NODE_24_209135	Unassigned	Unassigned	Unassigned	357_4	Clustered	7	VC_357_4	7	0.0732	0.999922	0.0732	1	1	1	0.7619
Feng_Q_2015_NC_ERR688626.NODE_44_153581	Unassigned	Unassigned	Unassigned	331_2	Clustered	4	VC_331_2	4	0.0297	0.999911	0.0297	1	1	1	1
Feng_Q_2015_NC_ERR688626.NODE_50_139189	Unassigned	Unassigned	Unassigned	331_11	Clustered	8	VC_331_11	8	0.0538	1	0.0538	1	1	1	1
Feng_Q_2015_NC_ERR688626.NODE_75_119800	Unassigned	Unassigned	Unassigned	334_1	Clustered	38	VC_334_1	38	0.4904	1	0.4904	1	1	1	0.7681
Feng_Q_2015_NC_ERR688632.NODE_10_226415	Unassigned	Unassigned	Unassigned	331_13	Clustered	26	VC_331_13	26	0.1628	1	0.1628	1	1	1	0.9908
Feng_Q_2015_NC_ERR688632.NODE_22_179180	Unassigned	Unassigned	Unassigned	334_1	Clustered	38	VC_334_1	38	0.4904	1	0.4904	1	1	1	0.7681
Feng_Q_2015_NC_ERR688632.NODE_56_124711	Unassigned	Unassigned	Unassigned	328_0	Clustered	35	VC_328_0	35	0.6388	1	0.6388	1	1	1	0.8992
Feng_Q_2015_NC_ERR688633.NODE_6706_6515	Unassigned	Unassigned	Unassigned	379_0	Clustered	2	VC_379_0	2	0.0243	0.718608	0.0175	1	1	1	1
Feng_Q_2015_NC_ERR688635.NODE_2103_16787	Unassigned	Unassigned	Unassigned	363_0	Clustered	3	VC_363_0	3	0.0225	0.687013	0.0154	1	1	1	1
Feng_Q_2015_NC_ERR688642.NODE_140_129000	Unassigned	Unassigned	Unassigned	331_11	Clustered	8	VC_331_11	8	0.0538	1	0.0538	1	1	1	1
Feng_Q_2015_NC_ERR688642.NODE_244_91493	Unassigned	Unassigned	Unassigned	357_5	Clustered/Singleton	1	VC_357_5	1	0	1	0	1	1	1	1
Feng_Q_2015_NC_ERR688642.NODE_262_85734	Unassigned	Unassigned	Unassigned	332_1	Clustered	41	VC_332_1	41	0.4805	1	0.4805	1	1	1	0.8146
Feng_Q_2015_NC_ERR688642.NODE_263_85708	Unassigned	Unassigned	Unassigned	357_2	Clustered	7	VC_357_2	7	0.0563	0.999799	0.0563	1	1	1	1
Feng_Q_2015_NC_ERR688642.NODE_74_174533	Unassigned	Unassigned	Unassigned	329_6	Clustered	8	VC_329_6	8	0.0694	1	0.0694	1	1	1	0.9286
Feng_Q_2015_NC_ERR688642.NODE_93_154348	Unassigned	Unassigned	Unassigned	356_3	Clustered	2	VC_356_3	2	0.0102	0.925021	0.0095	1	1	1	1
Feng_Q_2015_NC_ERR710424.NODE_224_72588	Unassigned	Unassigned	Unassigned	331_3	Clustered	32	VC_331_3	32	0.2198	1	0.2198	1	1	1	0.8649
Feng_Q_2015_NC_ERR710424.NODE_25_230116	Unassigned	Unassigned	Unassigned	357_6	Clustered	20	VC_357_6	20	0.1865	1	0.1865	1	1	1	0.9105
Feng_Q_2015_NC_ERR710429.NODE_1634_15065	Unassigned	Unassigned	Unassigned	374_0	Clustered	3	VC_374_0	3	0.2795	0.982118	0.2745	1	1	1	1
Feng_Q_2015_NC_ERR710432.NODE_47_178432	Unassigned	Unassigned	Unassigned	334_1	Clustered	38	VC_334_1	38	0.4904	1	0.4904	1	1	1	0.7681
Feng_Q_2015_NC_ERR710432.NODE_62_151820	Unassigned	Unassigned	Unassigned	328_2	Clustered/Singleton	1	VC_328_2	1	0	1	0	1	1	1	1
Feng_Q_2015_NC_ERR710432.NODE_9_302670	Unassigned	Unassigned	Unassigned	331_14	Clustered	3	VC_331_14	3	0.0106	0.982253	0.0104	1	1	1	1
Flavobacterium~phage~1H	Caudovirales	Siphoviridae	Unahavirus	381_0	Clustered	5	VC_381_0	5	1	1	1	1	1	1	1
Flavobacterium~phage~23T	Caudovirales	Siphoviridae	Unahavirus	381_0	Clustered	5	VC_381_0	5	1	1	1	1	1	1	1
Flavobacterium~phage~2A	Caudovirales	Siphoviridae	Unahavirus	381_0	Clustered	5	VC_381_0	5	1	1	1	1	1	1	1
Flavobacterium~phage~6H	Caudovirales	Siphoviridae	Unahavirus	381_0	Clustered	5	VC_381_0	5	1	1	1	1	1	1	1
Flavobacterium~phage~FCL-2	Caudovirales	Myoviridae	Ficleduovirus	272_0	Clustered	2	VC_272_0	2	0.7089	0.76025	0.5389	1	1	1	1
Flavobacterium~phage~FCV-1	Caudovirales	Myoviridae	Ficleduovirus	272_0	Clustered	2	VC_272_0	2	0.7089	0.76025	0.5389	1	1	1	1
Flavobacterium~phage~FpV4	Caudovirales	Podoviridae	Fipvunavirus	270_0	Clustered	5	VC_270_0	5	0.9789	0.9987	0.9776	1	1	1	1
Flavobacterium~phage~Fpv1	Caudovirales	Podoviridae	Fipvunavirus	270_0	Clustered	5	VC_270_0	5	0.9789	0.9987	0.9776	1	1	1	1
Flavobacterium~phage~Fpv10	Caudovirales	Siphoviridae	Unassigned	224_0	Clustered	6	VC_224_0	6	0.8543	1	0.8543	1	1	1	1
Flavobacterium~phage~Fpv11	Caudovirales	Siphoviridae	Unassigned	224_0	Clustered	6	VC_224_0	6	0.8543	1	0.8543	1	1	1	1
Flavobacterium~phage~Fpv2	Caudovirales	Podoviridae	Fipvunavirus	270_0	Clustered	5	VC_270_0	5	0.9789	0.9987	0.9776	1	1	1	1
Flavobacterium~phage~Fpv20	Caudovirales	Podoviridae	Fipvunavirus	270_0	Clustered	5	VC_270_0	5	0.9789	0.9987	0.9776	1	1	1	1
Flavobacterium~phage~Fpv3	Caudovirales	Podoviridae	Fipvunavirus	270_0	Clustered	5	VC_270_0	5	0.9789	0.9987	0.9776	1	1	1	1
Flavobacterium~phage~Fpv5	Caudovirales	Siphoviridae	Unassigned	224_0	Clustered	6	VC_224_0	6	0.8543	1	0.8543	1	1	1	1
Flavobacterium~phage~Fpv6	Caudovirales	Siphoviridae	Unassigned	224_0	Clustered	6	VC_224_0	6	0.8543	1	0.8543	1	1	1	1
Flavobacterium~phage~Fpv7	Caudovirales	Siphoviridae	Unassigned	224_0	Clustered	6	VC_224_0	6	0.8543	1	0.8543	1	1	1	1
Flavobacterium~phage~Fpv8	Caudovirales	Siphoviridae	Unassigned	224_0	Clustered	6	VC_224_0	6	0.8543	1	0.8543	1	1	1	1
Flavobacterium~phage~vB_FspM_lotta8-1	Caudovirales	Myoviridae	Unassigned	267_0	Clustered	2	VC_267_0	2	0.7482	0.918407	0.6871	1	1	1	1
Flavobacterium~phage~vB_FspM_pippi8-1	Caudovirales	Myoviridae	Unassigned	267_0	Clustered	2	VC_267_0	2	0.7482	0.918407	0.6871	1	1	1	1
Flavobacterium~phage~vB_FspS_filifjonk9-1	Caudovirales	Siphoviridae	Unassigned	271_0	Clustered	12	VC_271_0	12	0.9955	1	0.9955	1	1	1	1
Flavobacterium~phage~vB_FspS_hattifnatt9-1	Caudovirales	Siphoviridae	Unassigned	271_0	Clustered	12	VC_271_0	12	0.9955	1	0.9955	1	1	1	1
Flavobacterium~phage~vB_FspS_hemulen6-1	Caudovirales	Siphoviridae	Unassigned	271_0	Clustered	12	VC_271_0	12	0.9955	1	0.9955	1	1	1	1
Flavobacterium~phage~vB_FspS_laban6-1	Caudovirales	Siphoviridae	Unahavirus	381_0	Clustered	5	VC_381_0	5	1	1	1	1	1	1	1
Flavobacterium~phage~vB_FspS_lillamy9-1	Caudovirales	Siphoviridae	Unassigned	271_0	Clustered	12	VC_271_0	12	0.9955	1	0.9955	1	1	1	1
Flavobacterium~phage~vB_FspS_morran9-1	Caudovirales	Siphoviridae	Unassigned	271_0	Clustered	12	VC_271_0	12	0.9955	1	0.9955	1	1	1	1
Flavobacterium~phage~vB_FspS_mumin9-1	Caudovirales	Siphoviridae	Unassigned	271_0	Clustered	12	VC_271_0	12	0.9955	1	0.9955	1	1	1	1
Flavobacterium~phage~vB_FspS_mymlan6-1	Caudovirales	Siphoviridae	Unassigned	271_0	Clustered	12	VC_271_0	12	0.9955	1	0.9955	1	1	1	1
Flavobacterium~phage~vB_FspS_sniff9-1	Caudovirales	Siphoviridae	Unassigned	271_0	Clustered	12	VC_271_0	12	0.9955	1	0.9955	1	1	1	1
Flavobacterium~phage~vB_FspS_snork6-1	Caudovirales	Siphoviridae	Unassigned	271_0	Clustered	12	VC_271_0	12	0.9955	1	0.9955	1	1	1	1
Flavobacterium~phage~vB_FspS_snusmum6-1	Caudovirales	Siphoviridae	Unassigned	271_0	Clustered	12	VC_271_0	12	0.9955	1	0.9955	1	1	1	1
Flavobacterium~phage~vB_FspS_stinky9-1	Caudovirales	Siphoviridae	Unassigned	271_0	Clustered	12	VC_271_0	12	0.9955	1	0.9955	1	1	1	1
Flavobacterium~phage~vB_FspS_tooticki6-1	Caudovirales	Siphoviridae	Unassigned	271_0	Clustered	12	VC_271_0	12	0.9955	1	0.9955	1	1	1	1
GPD|uvig_137293	Unassigned	Unassigned	Unassigned	359_0	Clustered	22	VC_359_0	22	0.745	1	0.745	1	1	1	1
GPD|uvig_145864	Unassigned	Unassigned	Unassigned	324_0	Clustered	61	VC_324_0	61	0.6933	1	0.6933	1	1	1	1
GPD|uvig_147901	Unassigned	Unassigned	Unassigned	323_0	Clustered	23	VC_323_0	23	0.4894	1	0.4894	1	1	1	1
GPD|uvig_148987	Unassigned	Unassigned	Unassigned	383_0	Clustered	4	VC_383_0	4	0.166	0.999975	0.166	1	1	1	1
GPD|uvig_156887	Unassigned	Unassigned	Unassigned	324_0	Clustered	61	VC_324_0	61	0.6933	1	0.6933	1	1	1	1
GPD|uvig_163399	Unassigned	Unassigned	Unassigned	326_0	Clustered	22	VC_326_0	22	0.7319	1	0.7319	1	1	1	1
GPD|uvig_163681	Unassigned	Unassigned	Unassigned	324_0	Clustered	61	VC_324_0	61	0.6933	1	0.6933	1	1	1	1
GPD|uvig_174040	Unassigned	Unassigned	Unassigned	359_0	Clustered	22	VC_359_0	22	0.745	1	0.745	1	1	1	1
GPD|uvig_177382	Unassigned	Unassigned	Unassigned	324_0	Clustered	61	VC_324_0	61	0.6933	1	0.6933	1	1	1	1
GPD|uvig_178408	Unassigned	Unassigned	Unassigned	358_0	Clustered	25	VC_358_0	25	0.7076	1	0.7076	1	1	1	0.8267
GPD|uvig_178441	Unassigned	Unassigned	Unassigned	324_0	Clustered	61	VC_324_0	61	0.6933	1	0.6933	1	1	1	1
GPD|uvig_183331	Unassigned	Unassigned	Unassigned	326_0	Clustered	22	VC_326_0	22	0.7319	1	0.7319	1	1	1	1
GPD|uvig_185256	Unassigned	Unassigned	Unassigned	370_0	Clustered	7	VC_370_0	7	0.369	1	0.369	1	1	1	1
GPD|uvig_195409	Unassigned	Unassigned	Unassigned	323_0	Clustered	23	VC_323_0	23	0.4894	1	0.4894	1	1	1	1
GPD|uvig_196446	Unassigned	Unassigned	Unassigned	324_0	Clustered	61	VC_324_0	61	0.6933	1	0.6933	1	1	1	1
GPD|uvig_204047	Unassigned	Unassigned	Unassigned	324_0	Clustered	61	VC_324_0	61	0.6933	1	0.6933	1	1	1	1
GPD|uvig_204276	Unassigned	Unassigned	Unassigned	370_0	Clustered	7	VC_370_0	7	0.369	1	0.369	1	1	1	1
GPD|uvig_204331	Unassigned	Unassigned	Unassigned	395_0	Clustered	3	VC_395_0	3	0.6795	0.986558	0.6704	1	1	1	1
GPD|uvig_220840	Unassigned	Unassigned	Unassigned	324_0	Clustered	61	VC_324_0	61	0.6933	1	0.6933	1	1	1	1
GPD|uvig_245464	Unassigned	Unassigned	Unassigned	323_0	Clustered	23	VC_323_0	23	0.4894	1	0.4894	1	1	1	1
GPD|uvig_259726	Unassigned	Unassigned	Unassigned	326_0	Clustered	22	VC_326_0	22	0.7319	1	0.7319	1	1	1	1
GPD|uvig_281916	Unassigned	Unassigned	Unassigned	324_0	Clustered	61	VC_324_0	61	0.6933	1	0.6933	1	1	1	1
GPD|uvig_305526	Unassigned	Unassigned	Unassigned	389_0	Clustered	3	VC_389_0	3	0.5566	0.997527	0.5552	1	1	1	1
GPD|uvig_330919	Unassigned	Unassigned	Unassigned	358_0	Clustered	25	VC_358_0	25	0.7076	1	0.7076	1	1	1	0.8267
GPD|uvig_333147	Unassigned	Unassigned	Unassigned	370_0	Clustered	7	VC_370_0	7	0.369	1	0.369	1	1	1	1
GPD|uvig_338096	Unassigned	Unassigned	Unassigned	323_0	Clustered	23	VC_323_0	23	0.4894	1	0.4894	1	1	1	1
GPD|uvig_338375	Unassigned	Unassigned	Unassigned	324_0	Clustered	61	VC_324_0	61	0.6933	1	0.6933	1	1	1	1
GPD|uvig_351915	Unassigned	Unassigned	Unassigned	359_0	Clustered	22	VC_359_0	22	0.745	1	0.745	1	1	1	1
GPD|uvig_355152	Unassigned	Unassigned	Unassigned	324_0	Clustered	61	VC_324_0	61	0.6933	1	0.6933	1	1	1	1
GPD|uvig_384462	Unassigned	Unassigned	Unassigned	323_0	Clustered	23	VC_323_0	23	0.4894	1	0.4894	1	1	1	1
GPD|uvig_418233	Unassigned	Unassigned	Unassigned	324_0	Clustered	61	VC_324_0	61	0.6933	1	0.6933	1	1	1	1
GPD|uvig_441795	Unassigned	Unassigned	Unassigned	324_0	Clustered	61	VC_324_0	61	0.6933	1	0.6933	1	1	1	1
GPD|uvig_447134	Unassigned	Unassigned	Unassigned	324_0	Clustered	61	VC_324_0	61	0.6933	1	0.6933	1	1	1	1
GPD|uvig_487713	Unassigned	Unassigned	Unassigned	358_0	Clustered	25	VC_358_0	25	0.7076	1	0.7076	1	1	1	0.8267
GPD|uvig_545215	Unassigned	Unassigned	Unassigned	323_0	Clustered	23	VC_323_0	23	0.4894	1	0.4894	1	1	1	1
GPD|uvig_552052	Unassigned	Unassigned	Unassigned	326_0	Clustered	22	VC_326_0	22	0.7319	1	0.7319	1	1	1	1
GPD|uvig_552115	Unassigned	Unassigned	Unassigned	326_0	Clustered	22	VC_326_0	22	0.7319	1	0.7319	1	1	1	1
GPD|uvig_552897	Unassigned	Unassigned	Unassigned	326_0	Clustered	22	VC_326_0	22	0.7319	1	0.7319	1	1	1	1
GPD|uvig_558240	Unassigned	Unassigned	Unassigned	358_0	Clustered	25	VC_358_0	25	0.7076	1	0.7076	1	1	1	0.8267
GPD|uvig_558467	Unassigned	Unassigned	Unassigned	326_0	Clustered	22	VC_326_0	22	0.7319	1	0.7319	1	1	1	1
GPD|uvig_558965	Unassigned	Unassigned	Unassigned	358_0	Clustered	25	VC_358_0	25	0.7076	1	0.7076	1	1	1	0.8267
GPD|uvig_565629	Unassigned	Unassigned	Unassigned	323_0	Clustered	23	VC_323_0	23	0.4894	1	0.4894	1	1	1	1
GPD|uvig_580462	Unassigned	Unassigned	Unassigned	397_0	Clustered	4	VC_397_0	4	0.9235	0.997463	0.9212	1	1	1	1
GPD|uvig_582667	Unassigned	Unassigned	Unassigned	383_0	Clustered	4	VC_383_0	4	0.166	0.999975	0.166	1	1	1	1
GPD|uvig_584620	Unassigned	Unassigned	Unassigned	389_0	Clustered	3	VC_389_0	3	0.5566	0.997527	0.5552	1	1	1	1
GPD|uvig_587908	Unassigned	Unassigned	Unassigned	359_0	Clustered	22	VC_359_0	22	0.745	1	0.745	1	1	1	1
GPD|uvig_591342	Unassigned	Unassigned	Unassigned	323_0	Clustered	23	VC_323_0	23	0.4894	1	0.4894	1	1	1	1
GPD|uvig_591350	Unassigned	Unassigned	Unassigned	397_0	Clustered	4	VC_397_0	4	0.9235	0.997463	0.9212	1	1	1	1
GPD|uvig_59249	Unassigned	Unassigned	Unassigned	324_0	Clustered	61	VC_324_0	61	0.6933	1	0.6933	1	1	1	1
GPD|uvig_593340	Unassigned	Unassigned	Unassigned	383_0	Clustered	4	VC_383_0	4	0.166	0.999975	0.166	1	1	1	1
GPD|uvig_593635	Unassigned	Unassigned	Unassigned	383_0	Clustered	4	VC_383_0	4	0.166	0.999975	0.166	1	1	1	1
GPD|uvig_594210	Unassigned	Unassigned	Unassigned	358_0	Clustered	25	VC_358_0	25	0.7076	1	0.7076	1	1	1	0.8267
GPD|uvig_597759	Unassigned	Unassigned	Unassigned	358_0	Clustered	25	VC_358_0	25	0.7076	1	0.7076	1	1	1	0.8267
GPD|uvig_598747	Unassigned	Unassigned	Unassigned	359_0	Clustered	22	VC_359_0	22	0.745	1	0.745	1	1	1	1
GPD|uvig_86060	Unassigned	Unassigned	Unassigned	326_0	Clustered	22	VC_326_0	22	0.7319	1	0.7319	1	1	1	1
Geobacillus~phage~GBK2	Caudovirales	Siphoviridae	Unassigned	208_0	Clustered	3	VC_208_0	3	0.2976	0.958919	0.2854	3	1	1	0.6667
Geobacillus~phage~GBSV1	Caudovirales	Myoviridae	Svunavirus	120_0	Clustered	2	VC_120_0	2	0.4522	0.94551	0.4276	1	1	1	1
Geobacillus~phage~TP-84	Caudovirales	Siphoviridae	Tp84virus	208_0	Clustered	3	VC_208_0	3	0.2976	0.958919	0.2854	3	1	1	0.6667
Geobacillus~virus~E2	Caudovirales	Siphoviridae	Unassigned	60_0	Clustered	3	VC_60_0	3	0.2654	0.990409	0.2629	1	2	1	0.6667
Geobacillus~virus~E3	Caudovirales	Siphoviridae	Unassigned	170_2	Clustered/Singleton	1	VC_170_2	1	0	1	0	1	1	1	1
Gordonia~phage~Adgers	Caudovirales	Siphoviridae	Montyvirus	398_3	Clustered	12	VC_398_3	12	0.5467	1	0.5467	2	1	1	1
Gordonia~phage~Apricot	Caudovirales	Siphoviridae	Apricotvirus	160_1	Clustered/Singleton	1	VC_160_1	1	0	1	0	1	1	1	1
Gordonia~phage~Asapag	Caudovirales	Siphoviridae	Getalongvirus	160_0	Clustered	6	VC_160_0	6	0.5192	1	0.5192	3	1	1	1
Gordonia~phage~Attis	Caudovirales	Siphoviridae	Attisvirus	400_0	Clustered	2	VC_400_0	2	0.1689	0.954474	0.1612	1	1	1	1
Gordonia~phage~Avazak	Caudovirales	Siphoviridae	Unassigned	150_0	Clustered	12	VC_150_0	12	0.6551	1	0.6551	2	1	1	0.8939
Gordonia~phage~BENtherdunthat	Caudovirales	Siphoviridae	Getalongvirus	160_0	Clustered	6	VC_160_0	6	0.5192	1	0.5192	3	1	1	1
Gordonia~phage~Bachita	Caudovirales	Siphoviridae	Smoothievirus	408_0	Clustered	4	VC_408_0	4	0.3864	0.999866	0.3863	1	1	1	1
Gordonia~phage~Bantam	Caudovirales	Siphoviridae	Bantamvirus	407_0	Clustered	2	VC_407_0	2	0.2156	0.939818	0.2026	2	1	1	1
Gordonia~phage~BaxterFox	Caudovirales	Siphoviridae	Baxtervirus	400_1	Clustered	5	VC_400_1	5	0.4084	1	0.4084	2	1	1	0.9
Gordonia~phage~Beaver	Caudovirales	Siphoviridae	Montyvirus	398_3	Clustered	12	VC_398_3	12	0.5467	1	0.5467	2	1	1	1
Gordonia~phage~BetterKatz	Caudovirales	Siphoviridae	Betterkatzvirus	291_1	Clustered	2	VC_291_1	2	0.0658	0.955272	0.0629	2	1	1	1
Gordonia~phage~BirksAndSocks	Caudovirales	Siphoviridae	Montyvirus	398_3	Clustered	12	VC_398_3	12	0.5467	1	0.5467	2	1	1	1
Gordonia~phage~Blueberry	Caudovirales	Siphoviridae	Unassigned	292_0	Clustered	8	VC_292_0	8	0.7009	1	0.7009	1	1	1	1
Gordonia~phage~Brandonk123	Caudovirales	Siphoviridae	Vividuovirus	412_0	Clustered	5	VC_412_0	5	0.7997	0.999986	0.7997	2	1	1	1
Gordonia~phage~BrutonGaster	Caudovirales	Siphoviridae	Oneupvirus	408_1	Clustered	2	VC_408_1	2	0.1106	0.941721	0.1042	2	1	1	1
Gordonia~phage~CaptainKirk2	Caudovirales	Siphoviridae	Unassigned	292_0	Clustered	8	VC_292_0	8	0.7009	1	0.7009	1	1	1	1
Gordonia~phage~CarolAnn	Caudovirales	Siphoviridae	Unassigned	292_0	Clustered	8	VC_292_0	8	0.7009	1	0.7009	1	1	1	1
Gordonia~phage~Chelms	Caudovirales	Siphoviridae	Woesvirus	398_3	Clustered	12	VC_398_3	12	0.5467	1	0.5467	2	1	1	1
Gordonia~phage~Chikenjars	Caudovirales	Siphoviridae	Unassigned	150_0	Clustered	12	VC_150_0	12	0.6551	1	0.6551	2	1	1	0.8939
Gordonia~phage~ClubL	Caudovirales	Siphoviridae	Smoothievirus	408_0	Clustered	4	VC_408_0	4	0.3864	0.999866	0.3863	1	1	1	1
Gordonia~phage~Cozz	Caudovirales	Siphoviridae	Emalynvirus	401_0	Clustered	4	VC_401_0	4	0.6665	0.999959	0.6664	1	1	1	1
Gordonia~phage~Crocheter	Caudovirales	Siphoviridae	Unassigned	150_0	Clustered	12	VC_150_0	12	0.6551	1	0.6551	2	1	1	0.8939
Gordonia~phage~Cucurbita	Caudovirales	Siphoviridae	Smoothievirus	408_0	Clustered	4	VC_408_0	4	0.3864	0.999866	0.3863	1	1	1	1
Gordonia~phage~Daredevil	Caudovirales	Siphoviridae	Daredevilvirus	407_0	Clustered	2	VC_407_0	2	0.2156	0.939818	0.2026	2	1	1	1
Gordonia~phage~Demosthenes	Caudovirales	Siphoviridae	Demosthenesvirus	398_0	Clustered	3	VC_398_0	3	0.119	0.998177	0.1188	1	1	1	1
Gordonia~phage~Duffington	Caudovirales	Siphoviridae	Unassigned	150_0	Clustered	12	VC_150_0	12	0.6551	1	0.6551	2	1	1	0.8939
Gordonia~phage~Emalyn	Caudovirales	Siphoviridae	Emalynvirus	401_0	Clustered	4	VC_401_0	4	0.6665	0.999959	0.6664	1	1	1	1
Gordonia~phage~Fairfaxidum	Caudovirales	Siphoviridae	Unassigned	292_0	Clustered	8	VC_292_0	8	0.7009	1	0.7009	1	1	1	1
Gordonia~phage~Flakey	Caudovirales	Siphoviridae	Montyvirus	398_3	Clustered	12	VC_398_3	12	0.5467	1	0.5467	2	1	1	1
Gordonia~phage~Fryberger	Caudovirales	Siphoviridae	Ronaldovirus	415_0	Clustered	2	VC_415_0	2	0.9502	0.89435	0.8498	1	1	1	1
Gordonia~phage~GMA1	Caudovirales	Siphoviridae	Unassigned	135_0	Clustered	3	VC_135_0	3	0.1459	0.99045	0.1445	1	1	1	1
Gordonia~phage~GMA3	Caudovirales	Siphoviridae	Gamtrevirus	399_0	Clustered	5	VC_399_0	5	0.3452	1	0.3452	3	1	1	1
Gordonia~phage~GMA5	Caudovirales	Siphoviridae	Unassigned	152_0	Clustered	4	VC_152_0	4	0.7852	0.990672	0.7779	1	1	1	1
Gordonia~phage~GMA7	Caudovirales	Siphoviridae	Getseptimavirus	398_2	Clustered	2	VC_398_2	2	0.0533	0.952034	0.0508	1	1	1	1
Gordonia~phage~GRU1	Caudovirales	Siphoviridae	Unassigned	296_0	Clustered	3	VC_296_0	3	0.6373	0.998128	0.6361	1	1	1	1
Gordonia~phage~GRU3	Caudovirales	Siphoviridae	Unassigned	152_0	Clustered	4	VC_152_0	4	0.7852	0.990672	0.7779	1	1	1	1
Gordonia~phage~GTE2	Caudovirales	Siphoviridae	Emalynvirus	401_0	Clustered	4	VC_401_0	4	0.6665	0.999959	0.6664	1	1	1	1
Gordonia~phage~GTE5	Caudovirales	Siphoviridae	Unassigned	296_0	Clustered	3	VC_296_0	3	0.6373	0.998128	0.6361	1	1	1	1
Gordonia~phage~GTE6	Caudovirales	Siphoviridae	Unassigned	412_0	Clustered	5	VC_412_0	5	0.7997	0.999986	0.7997	2	1	1	1
Gordonia~phage~GTE7	Caudovirales	Siphoviridae	Getseptimavirus	398_2	Clustered	2	VC_398_2	2	0.0533	0.952034	0.0508	1	1	1	1
Gordonia~phage~GTE8	Caudovirales	Siphoviridae	Unassigned	296_0	Clustered	3	VC_296_0	3	0.6373	0.998128	0.6361	1	1	1	1
Gordonia~phage~Getalong	Caudovirales	Siphoviridae	Getalongvirus	160_0	Clustered	6	VC_160_0	6	0.5192	1	0.5192	3	1	1	1
Gordonia~phage~Gibbin	Caudovirales	Siphoviridae	Unassigned	417_0	Clustered	5	VC_417_0	5	0.4826	1	0.4826	1	1	1	1
Gordonia~phage~Gmala1	Caudovirales	Siphoviridae	Gordtnkvirus	399_0	Clustered	5	VC_399_0	5	0.3452	1	0.3452	3	1	1	1
Gordonia~phage~GordDuk1	Caudovirales	Siphoviridae	Gordtnkvirus	399_0	Clustered	5	VC_399_0	5	0.3452	1	0.3452	3	1	1	1
Gordonia~phage~GordTnk2	Caudovirales	Siphoviridae	Gordtnkvirus	399_0	Clustered	5	VC_399_0	5	0.3452	1	0.3452	3	1	1	1
Gordonia~phage~Gsput1	Caudovirales	Siphoviridae	Gesputvirus	136_0	Clustered	3	VC_136_0	3	0.7104	0.997982	0.709	2	1	1	1
Gordonia~phage~Guacamole	Caudovirales	Siphoviridae	Unassigned	292_0	Clustered	8	VC_292_0	8	0.7009	1	0.7009	1	1	1	1
Gordonia~phage~Gustav	Caudovirales	Siphoviridae	Gustavvirus	137_0	Clustered	3	VC_137_0	3	0.4373	0.998427	0.4366	2	1	1	1
Gordonia~phage~Horus	Caudovirales	Siphoviridae	Horusvirus	160_0	Clustered	6	VC_160_0	6	0.5192	1	0.5192	3	1	1	1
Gordonia~phage~Hotorobo	Caudovirales	Siphoviridae	Woesvirus	398_3	Clustered	12	VC_398_3	12	0.5467	1	0.5467	2	1	1	1
Gordonia~phage~Jellybones	Caudovirales	Siphoviridae	Montyvirus	398_3	Clustered	12	VC_398_3	12	0.5467	1	0.5467	2	1	1	1
Gordonia~phage~John316	Caudovirales	Siphoviridae	Montyvirus	398_3	Clustered	12	VC_398_3	12	0.5467	1	0.5467	2	1	1	1
Gordonia~phage~Jumbo	Caudovirales	Siphoviridae	Gorjumvirus	399_0	Clustered	5	VC_399_0	5	0.3452	1	0.3452	3	1	1	1
Gordonia~phage~Katyusha	Caudovirales	Siphoviridae	Demosthenesvirus	398_0	Clustered	3	VC_398_0	3	0.119	0.998177	0.1188	1	1	1	1
Gordonia~phage~Kenna	Caudovirales	Siphoviridae	Getalongvirus	160_0	Clustered	6	VC_160_0	6	0.5192	1	0.5192	3	1	1	1
Gordonia~phage~Kenosha	Caudovirales	Siphoviridae	Unassigned	150_0	Clustered	12	VC_150_0	12	0.6551	1	0.6551	2	1	1	0.8939
Gordonia~phage~Kita	Caudovirales	Siphoviridae	Nymphadoravirus	400_1	Clustered	5	VC_400_1	5	0.4084	1	0.4084	2	1	1	0.9
Gordonia~phage~Kvothe	Caudovirales	Siphoviridae	Demosthenesvirus	398_0	Clustered	3	VC_398_0	3	0.119	0.998177	0.1188	1	1	1	1
Gordonia~phage~Lambo	Caudovirales	Siphoviridae	Unassigned	417_0	Clustered	5	VC_417_0	5	0.4826	1	0.4826	1	1	1	1
Gordonia~phage~Lennon	Caudovirales	Siphoviridae	Vividuovirus	412_0	Clustered	5	VC_412_0	5	0.7997	0.999986	0.7997	2	1	1	1
Gordonia~phage~Mahdia	Caudovirales	Siphoviridae	Gustavvirus	137_0	Clustered	3	VC_137_0	3	0.4373	0.998427	0.4366	2	1	1	1
Gordonia~phage~McGonagall	Caudovirales	Siphoviridae	Unassigned	152_0	Clustered	4	VC_152_0	4	0.7852	0.990672	0.7779	1	1	1	1
Gordonia~phage~Monty	Caudovirales	Siphoviridae	Woesvirus	398_3	Clustered	12	VC_398_3	12	0.5467	1	0.5467	2	1	1	1
Gordonia~phage~Nymphadora	Caudovirales	Siphoviridae	Nymphadoravirus	400_1	Clustered	5	VC_400_1	5	0.4084	1	0.4084	2	1	1	0.9
Gordonia~phage~Obliviate	Caudovirales	Siphoviridae	Unassigned	292_0	Clustered	8	VC_292_0	8	0.7009	1	0.7009	1	1	1	1
Gordonia~phage~OhMyWard	Caudovirales	Siphoviridae	Unassigned	150_0	Clustered	12	VC_150_0	12	0.6551	1	0.6551	2	1	1	0.8939
Gordonia~phage~OneUp	Caudovirales	Siphoviridae	Smoothievirus	408_1	Clustered	2	VC_408_1	2	0.1106	0.941721	0.1042	2	1	1	1
Gordonia~phage~Phinally	Caudovirales	Siphoviridae	Unassigned	412_0	Clustered	5	VC_412_0	5	0.7997	0.999986	0.7997	2	1	1	1
Gordonia~phage~Phistory	Caudovirales	Siphoviridae	Phistoryvirus	160_0	Clustered	6	VC_160_0	6	0.5192	1	0.5192	3	1	1	1
Gordonia~phage~Ranch	Caudovirales	Siphoviridae	Unassigned	417_0	Clustered	5	VC_417_0	5	0.4826	1	0.4826	1	1	1	1
Gordonia~phage~Rickmore	Caudovirales	Siphoviridae	Unassigned	150_0	Clustered	12	VC_150_0	12	0.6551	1	0.6551	2	1	1	0.8939
Gordonia~phage~Ronaldo	Caudovirales	Siphoviridae	Ronaldovirus	415_0	Clustered	2	VC_415_0	2	0.9502	0.89435	0.8498	1	1	1	1
Gordonia~phage~Ruthy	Caudovirales	Siphoviridae	Ruthyvirus	291_1	Clustered	2	VC_291_1	2	0.0658	0.955272	0.0629	2	1	1	1
Gordonia~phage~Sadboi	Caudovirales	Siphoviridae	Unassigned	417_0	Clustered	5	VC_417_0	5	0.4826	1	0.4826	1	1	1	1
Gordonia~phage~Secretariat	Caudovirales	Siphoviridae	Unassigned	150_0	Clustered	12	VC_150_0	12	0.6551	1	0.6551	2	1	1	0.8939
Gordonia~phage~Smoothie	Caudovirales	Siphoviridae	Smoothievirus	408_0	Clustered	4	VC_408_0	4	0.3864	0.999866	0.3863	1	1	1	1
Gordonia~phage~SoilAssassin	Caudovirales	Siphoviridae	Attisvirus	400_0	Clustered	2	VC_400_0	2	0.1689	0.954474	0.1612	1	1	1	1
Gordonia~phage~Sombrero	Caudovirales	Siphoviridae	Montyvirus	398_3	Clustered	12	VC_398_3	12	0.5467	1	0.5467	2	1	1	1
Gordonia~phage~Sour	Caudovirales	Siphoviridae	Sourvirus	426_0	Clustered/Singleton	1	VC_426_0	1	0	1	0	1	1	1	1
Gordonia~phage~Splinter	Caudovirales	Siphoviridae	Vendettavirus	136_0	Clustered	3	VC_136_0	3	0.7104	0.997982	0.709	2	1	1	1
Gordonia~phage~SteveFrench	Caudovirales	Siphoviridae	Montyvirus	398_3	Clustered	12	VC_398_3	12	0.5467	1	0.5467	2	1	1	1
Gordonia~phage~Suzy	Caudovirales	Siphoviridae	Terapinvirus	418_0	Clustered	2	VC_418_0	2	0.1625	0.952255	0.1548	1	1	1	1
Gordonia~phage~Tanis	Caudovirales	Siphoviridae	Unassigned	150_0	Clustered	12	VC_150_0	12	0.6551	1	0.6551	2	1	1	0.8939
Gordonia~phage~Terapin	Caudovirales	Siphoviridae	Terapinvirus	418_0	Clustered	2	VC_418_0	2	0.1625	0.952255	0.1548	1	1	1	1
Gordonia~phage~Trine	Caudovirales	Siphoviridae	Trinevirus	137_0	Clustered	3	VC_137_0	3	0.4373	0.998427	0.4366	2	1	1	1
Gordonia~phage~Troje	Caudovirales	Siphoviridae	Emalynvirus	401_0	Clustered	4	VC_401_0	4	0.6665	0.999959	0.6664	1	1	1	1
Gordonia~phage~Twister6	Caudovirales	Siphoviridae	Wizardvirus	402_0	Clustered	2	VC_402_0	2	0.3635	0.950122	0.3454	1	1	1	1
Gordonia~phage~UmaThurman	Caudovirales	Siphoviridae	Unassigned	292_0	Clustered	8	VC_292_0	8	0.7009	1	0.7009	1	1	1	1
Gordonia~phage~Untouchable	Caudovirales	Siphoviridae	Unassigned	150_0	Clustered	12	VC_150_0	12	0.6551	1	0.6551	2	1	1	0.8939
Gordonia~phage~Utz	Caudovirales	Siphoviridae	Unassigned	292_0	Clustered	8	VC_292_0	8	0.7009	1	0.7009	1	1	1	1
Gordonia~phage~Vendetta	Caudovirales	Siphoviridae	Vendettavirus	136_0	Clustered	3	VC_136_0	3	0.7104	0.997982	0.709	2	1	1	1
Gordonia~phage~Vivi2	Caudovirales	Siphoviridae	Vividuovirus	412_0	Clustered	5	VC_412_0	5	0.7997	0.999986	0.7997	2	1	1	1
Gordonia~phage~Wizard	Caudovirales	Siphoviridae	Wizardvirus	402_0	Clustered	2	VC_402_0	2	0.3635	0.950122	0.3454	1	1	1	1
Gordonia~phage~Woes	Caudovirales	Siphoviridae	Woesvirus	398_3	Clustered	12	VC_398_3	12	0.5467	1	0.5467	2	1	1	1
Gordonia~phage~Yeezy	Caudovirales	Siphoviridae	Baxtervirus	400_1	Clustered	5	VC_400_1	5	0.4084	1	0.4084	2	1	1	0.9
Gordonia~phage~Yikes	Caudovirales	Siphoviridae	Unassigned	417_0	Clustered	5	VC_417_0	5	0.4826	1	0.4826	1	1	1	1
Gordonia~phage~Zirinka	Caudovirales	Siphoviridae	Nymphadoravirus	400_1	Clustered	5	VC_400_1	5	0.4084	1	0.4084	2	1	1	0.9
HMP.158499257.contig46474_38876	Unassigned	Unassigned	Unassigned	324_0	Clustered	61	VC_324_0	61	0.6933	1	0.6933	1	1	1	1
HMP.370027359.contig60005_6711	Unassigned	Unassigned	Unassigned	385_0	Clustered	3	VC_385_0	3	0.0679	0.946267	0.0642	1	1	1	1
HMP.706846339.contig81847_53536	Unassigned	Unassigned	Unassigned	358_0	Clustered	25	VC_358_0	25	0.7076	1	0.7076	1	1	1	0.8267
HMP.763678604.contig63623_40452	Unassigned	Unassigned	Unassigned	326_0	Clustered	22	VC_326_0	22	0.7319	1	0.7319	1	1	1	1
HMP.763698834.contig11430_20516	Unassigned	Unassigned	Unassigned	378_0	Clustered	4	VC_378_0	4	0.0709	0.935906	0.0663	1	1	1	1
HMP.763860675.contig65806_66934	Unassigned	Unassigned	Unassigned	331_3	Clustered	32	VC_331_3	32	0.2198	1	0.2198	1	1	1	0.8649
HMP.763860675.contig67146_10080	Unassigned	Unassigned	Unassigned	364_0	Clustered	7	VC_364_0	7	0.1986	0.999999	0.1986	1	1	1	1
HMP.764062976.contig18993_126298	Unassigned	Unassigned	Unassigned	356_0	Clustered	4	VC_356_0	4	0.0324	0.999968	0.0324	1	1	1	1
HMP.764062976.contig215436_8358	Unassigned	Unassigned	Unassigned	369_0	Clustered	6	VC_369_0	6	0.1592	1	0.1592	1	1	1	1
HMP.764062976.contig36899_56556	Unassigned	Unassigned	Unassigned	358_0	Clustered	25	VC_358_0	25	0.7076	1	0.7076	1	1	1	0.8267
HMP.764062976.contig62638_78500	Unassigned	Unassigned	Unassigned	333_0	Clustered	22	VC_333_0	22	0.3822	1	0.3822	1	1	1	0.9784
HMP.764083206.contig155544_8721	Unassigned	Unassigned	Unassigned	360_0	Clustered	11	VC_360_0	11	0.0999	1	0.0999	1	1	1	1
HMP.SRS048870.scaffold27331_1	Unassigned	Unassigned	Unassigned	373_0	Clustered	2	VC_373_0	2	0.2257	0.729854	0.1647	1	1	1	1
HMP.SRS048870.scaffold89200_1	Unassigned	Unassigned	Unassigned	373_0	Clustered	2	VC_373_0	2	0.2257	0.729854	0.1647	1	1	1	1
HMP.SRS049773.contig8443_4801	Unassigned	Unassigned	Unassigned	379_0	Clustered	2	VC_379_0	2	0.0243	0.718608	0.0175	1	1	1	1
HMP.SRS055017.contig131148_8109	Unassigned	Unassigned	Unassigned	385_0	Clustered	3	VC_385_0	3	0.0679	0.946267	0.0642	1	1	1	1
HMP.SRS055017.contig37574_35635	Unassigned	Unassigned	Unassigned	358_0	Clustered	25	VC_358_0	25	0.7076	1	0.7076	1	1	1	0.8267
HMP.SRS077024.contig34979_404	Unassigned	Unassigned	Unassigned	386_0	Clustered	2	VC_386_0	2	0.0289	0.942872	0.0272	1	1	1	1
HMP.SRS1041033.contig18634_8187	Unassigned	Unassigned	Unassigned	376_0	Clustered	2	VC_376_0	2	0.0406	0.718488	0.0292	1	1	1	1
HMP.SRS148196.contig141895_1499	Unassigned	Unassigned	Unassigned	396_0	Clustered	2	VC_396_0	2	0.0738	0.85408	0.063	1	1	1	1
Haemophilus~phage~Aaphi23	Caudovirales	Myoviridae	Unassigned	110_0	Clustered	2	VC_110_0	2	0.4036	0.94664	0.3821	1	1	1	1
Haemophilus~virus~HP1	Caudovirales	Myoviridae	Hp1virus	107_0	Clustered	14	VC_107_0	14	0.8861	1	0.8861	8	1	1	1
Haemophilus~virus~HP2	Caudovirales	Myoviridae	Hp1virus	107_0	Clustered	14	VC_107_0	14	0.8861	1	0.8861	8	1	1	1
Haloarcula~californiae~icosahedral~virus~1	Halopanivirales	Sphaerolipoviridae	Alphasphaerolipovirus	429_0	Clustered	4	VC_429_0	4	1	1	1	1	1	1	1
Haloarcula~hispanica~icosahedral~virus~2	Halopanivirales	Sphaerolipoviridae	Alphasphaerolipovirus	429_0	Clustered	4	VC_429_0	4	1	1	1	1	1	1	1
Haloarcula~hispanica~pleomorphic~virus~1	Haloruvirales	Pleolipoviridae	Alphapleolipovirus	430_0	Clustered	5	VC_430_0	5	1	1	1	1	1	1	1
Haloarcula~hispanica~pleomorphic~virus~2	Haloruvirales	Pleolipoviridae	Alphapleolipovirus	430_0	Clustered	5	VC_430_0	5	1	1	1	1	1	1	1
Haloarcula~hispanica~pleomorphic~virus~3	Haloruvirales	Pleolipoviridae	Betapleolipovirus	431_0	Clustered	2	VC_431_0	2	0.8134	0.729854	0.5937	1	1	1	1
Haloarcula~hispanica~pleomorphic~virus~4	Haloruvirales	Pleolipoviridae	Betapleolipovirus	431_0	Clustered	2	VC_431_0	2	0.8134	0.729854	0.5937	1	1	1	1
Haloarcula~hispanica~virus~PH1	Halopanivirales	Sphaerolipoviridae	Alphasphaerolipovirus	429_0	Clustered	4	VC_429_0	4	1	1	1	1	1	1	1
Haloarcula~hispanica~virus~SH1	Halopanivirales	Sphaerolipoviridae	Alphasphaerolipovirus	429_0	Clustered	4	VC_429_0	4	1	1	1	1	1	1	1
Halocynthia~phage~JM-2012	Caudovirales	Myoviridae	Unassigned	302_2	Clustered/Singleton	1	VC_302_2	1	0	1	0	1	1	1	1
Halogeometricum~pleomorphic~virus~1	Haloruvirales	Pleolipoviridae	Betapleolipovirus	433_0	Clustered	3	VC_433_0	3	0.8107	0.974085	0.7897	2	2	2	1
Halomonas~virus~HAP1	Caudovirales	Myoviridae	Hapunavirus	335_0	Clustered	2	VC_335_0	2	0.2657	0.937339	0.249	1	1	1	1
Halorubrum~phage~CGphi46	Unassigned	Unassigned	Unassigned	127_0	Clustered	2	VC_127_0	2	0.8117	0.814453	0.6611	1	2	2	1
Halorubrum~phage~HF2	Caudovirales	Myoviridae	Unassigned	435_0	Clustered	3	VC_435_0	3	0.665	0.99314	0.6605	1	1	1	1
Halorubrum~pleomorphic~virus~1	Haloruvirales	Pleolipoviridae	Alphapleolipovirus	430_0	Clustered	5	VC_430_0	5	1	1	1	1	1	1	1
Halorubrum~pleomorphic~virus~10	Haloruvirales	Pleolipoviridae	Betapleolipovirus	432_0	Clustered	3	VC_432_0	3	0.9048	0.959572	0.8683	1	1	1	1
Halorubrum~pleomorphic~virus~11	Haloruvirales	Pleolipoviridae	Betapleolipovirus	432_0	Clustered	3	VC_432_0	3	0.9048	0.959572	0.8683	1	1	1	1
Halorubrum~pleomorphic~virus~12	Haloruvirales	Pleolipoviridae	Betapleolipovirus	432_0	Clustered	3	VC_432_0	3	0.9048	0.959572	0.8683	1	1	1	1
Halorubrum~pleomorphic~virus~2	Haloruvirales	Pleolipoviridae	Alphapleolipovirus	430_0	Clustered	5	VC_430_0	5	1	1	1	1	1	1	1
Halorubrum~pleomorphic~virus~6	Haloruvirales	Pleolipoviridae	Alphapleolipovirus	430_0	Clustered	5	VC_430_0	5	1	1	1	1	1	1	1
Halovirus~HCTV-1	Unassigned	Unassigned	Unassigned	434_0	Clustered	3	VC_434_0	3	0.8909	0.988673	0.8808	1	1	1	1
Halovirus~HCTV-2	Unassigned	Unassigned	Unassigned	437_0	Clustered	2	VC_437_0	2	0.4731	0.855578	0.4048	1	1	1	1
Halovirus~HCTV-5	Unassigned	Unassigned	Unassigned	434_0	Clustered	3	VC_434_0	3	0.8909	0.988673	0.8808	1	1	1	1
Halovirus~HHTV-2	Unassigned	Unassigned	Unassigned	437_0	Clustered	2	VC_437_0	2	0.4731	0.855578	0.4048	1	1	1	1
Halovirus~HRTV-4	Unassigned	Unassigned	Unassigned	128_0	Clustered	2	VC_128_0	2	0.589	0.5	0.2945	1	1	1	1
Halovirus~HRTV-5	Caudovirales	Myoviridae	Unassigned	435_0	Clustered	3	VC_435_0	3	0.665	0.99314	0.6605	1	1	1	1
Halovirus~HRTV-8	Caudovirales	Myoviridae	Unassigned	435_0	Clustered	3	VC_435_0	3	0.665	0.99314	0.6605	1	1	1	1
Halovirus~HSTV-1	Unassigned	Unassigned	Unassigned	128_0	Clustered	2	VC_128_0	2	0.589	0.5	0.2945	1	1	1	1
Halovirus~HVTV-1	Unassigned	Unassigned	Unassigned	434_0	Clustered	3	VC_434_0	3	0.8909	0.988673	0.8808	1	1	1	1
Hamiltonella~virus~APSE1	Caudovirales	Podoviridae	Unassigned	218_0	Clustered	2	VC_218_0	2	0.1197	0.952993	0.1141	1	1	1	1
Helicobacter~phage~1961P	Caudovirales	Podoviridae	Una961virus	438_0	Clustered	4	VC_438_0	4	1	1	1	2	1	1	1
Helicobacter~phage~KHP30	Caudovirales	Podoviridae	Una961virus	438_0	Clustered	4	VC_438_0	4	1	1	1	2	1	1	1
Helicobacter~phage~KHP40	Caudovirales	Podoviridae	Una961virus	438_0	Clustered	4	VC_438_0	4	1	1	1	2	1	1	1
Helicobacter~phage~phiHP33	Caudovirales	Podoviridae	Schmidvirus	438_0	Clustered	4	VC_438_0	4	1	1	1	2	1	1	1
IMG|DTR_387488	Unassigned	Unassigned	Unassigned	397_0	Clustered	4	VC_397_0	4	0.9235	0.997463	0.9212	1	1	1	1
IMG|DTR_392373	Unassigned	Unassigned	Unassigned	359_0	Clustered	22	VC_359_0	22	0.745	1	0.745	1	1	1	1
IMG|DTR_584019	Unassigned	Unassigned	Unassigned	326_0	Clustered	22	VC_326_0	22	0.7319	1	0.7319	1	1	1	1
IMG|DTR_733507	Unassigned	Unassigned	Unassigned	324_0	Clustered	61	VC_324_0	61	0.6933	1	0.6933	1	1	1	1
IMG|GCA_003963595.1	Unassigned	Unassigned	Unassigned	440_0	Clustered	7	VC_440_0	7	0.8665	1	0.8665	1	1	1	1
IMG|GCA_003963895.1	Unassigned	Unassigned	Unassigned	440_0	Clustered	7	VC_440_0	7	0.8665	1	0.8665	1	1	1	1
IMG|GCA_003964035.1	Unassigned	Unassigned	Unassigned	441_0	Clustered	4	VC_441_0	4	0.616	0.999999	0.616	1	1	1	1
IMG|GCA_003964135.1	Unassigned	Unassigned	Unassigned	439_0	Clustered	2	VC_439_0	2	0.3095	0.729854	0.2259	1	1	1	1
IMG|IMGVR_UViG_2065487003_000002|2065487003|mockstg_il_soap_contig_48	Unassigned	Unassigned	Unassigned	324_0	Clustered	61	VC_324_0	61	0.6933	1	0.6933	1	1	1	1
IMG|IMGVR_UViG_2554235476_000001|2554235476|2554309869	Unassigned	Unassigned	Unassigned	433_0	Clustered	3	VC_433_0	3	0.8107	0.974085	0.7897	2	2	2	1
IMG|IMGVR_UViG_2554235498_000001|2554235498|2554311572	Unassigned	Unassigned	Unassigned	433_0	Clustered	3	VC_433_0	3	0.8107	0.974085	0.7897	2	2	2	1
IMG|IMGVR_UViG_3300007802_000040|3300007802|Ga0105667_101691	Unassigned	Unassigned	Unassigned	388_0	Clustered/Singleton	1	VC_388_0	1	0	1	0	1	1	1	1
IMG|IMGVR_UViG_3300008132_000081|3300008132|Ga0111230_1002000	Unassigned	Unassigned	Unassigned	395_0	Clustered	3	VC_395_0	3	0.6795	0.986558	0.6704	1	1	1	1
IMG|IMGVR_UViG_3300008268_000037|3300008268|Ga0111491_1000709	Unassigned	Unassigned	Unassigned	324_0	Clustered	61	VC_324_0	61	0.6933	1	0.6933	1	1	1	1
IMG|IMGVR_UViG_3300008299_000034|3300008299|Ga0114868_1000657|1185-38654	Unassigned	Unassigned	Unassigned	324_0	Clustered	61	VC_324_0	61	0.6933	1	0.6933	1	1	1	1
IMG|IMGVR_UViG_3300008523_000017|3300008523|Ga0115231_1000581	Unassigned	Unassigned	Unassigned	324_0	Clustered	61	VC_324_0	61	0.6933	1	0.6933	1	1	1	1
IMG|IMGVR_UViG_3300008725_000008|3300008725|Ga0115670_1000674	Unassigned	Unassigned	Unassigned	326_0	Clustered	22	VC_326_0	22	0.7319	1	0.7319	1	1	1	1
IMG|IMGVR_UViG_3300010278_000002|3300010278|Ga0129311_1000428	Unassigned	Unassigned	Unassigned	324_0	Clustered	61	VC_324_0	61	0.6933	1	0.6933	1	1	1	1
IMG|IMGVR_UViG_3300014028_000007|3300014028|Ga0117810_1000126	Unassigned	Unassigned	Unassigned	359_0	Clustered	22	VC_359_0	22	0.745	1	0.745	1	1	1	1
IMG|IMGVR_UViG_3300021255_000120|3300021255|Ga0223825_12561298	Unassigned	Unassigned	Unassigned	390_0	Clustered	3	VC_390_0	3	0.7338	0.98908	0.7258	1	1	1	1
IMG|IMGVR_UViG_3300021256_000170|3300021256|Ga0223826_10001368	Unassigned	Unassigned	Unassigned	390_0	Clustered	3	VC_390_0	3	0.7338	0.98908	0.7258	1	1	1	1
IMG|IMGVR_UViG_3300021295_000003|3300021295|Ga0214522_1000017	Unassigned	Unassigned	Unassigned	391_0	Clustered/Singleton	1	VC_391_0	1	0	1	0	1	1	1	1
IMG|IMGVR_UViG_3300021399_000238|3300021399|Ga0224415_10000710	Unassigned	Unassigned	Unassigned	390_0	Clustered	3	VC_390_0	3	0.7338	0.98908	0.7258	1	1	1	1
IMG|IMGVR_UViG_3300027976_000177|3300027976|Ga0209702_10003104	Unassigned	Unassigned	Unassigned	109_0	Clustered	2	VC_109_0	2	0.3761	0.932327	0.3506	1	2	2	1
IMG|IMGVR_UViG_3300029718_000038|3300029718|Ga0245237_1001780	Unassigned	Unassigned	Unassigned	326_0	Clustered	22	VC_326_0	22	0.7319	1	0.7319	1	1	1	1
IMG|IMGVR_UViG_3300029852_000010|3300029852|Ga0245291_100449	Unassigned	Unassigned	Unassigned	359_0	Clustered	22	VC_359_0	22	0.745	1	0.745	1	1	1	1
IMG|IMGVR_UViG_3300029871_000021|3300029871|Ga0245314_100772	Unassigned	Unassigned	Unassigned	326_0	Clustered	22	VC_326_0	22	0.7319	1	0.7319	1	1	1	1
IMG|IMGVR_UViG_3300029885_000006|3300029885|Ga0245329_100482|1171-40797	Unassigned	Unassigned	Unassigned	323_0	Clustered	23	VC_323_0	23	0.4894	1	0.4894	1	1	1	1
IMG|NC_039061.1	Unassigned	Unassigned	Unassigned	440_0	Clustered	7	VC_440_0	7	0.8665	1	0.8665	1	1	1	1
IMG|NC_039062.1	Unassigned	Unassigned	Unassigned	439_0	Clustered	2	VC_439_0	2	0.3095	0.729854	0.2259	1	1	1	1
IMG|NC_039063.1	Unassigned	Unassigned	Unassigned	441_0	Clustered	4	VC_441_0	4	0.616	0.999999	0.616	1	1	1	1
IMG|Norman_113_NODE_25_length_2504_cov_6.768477	Unassigned	Unassigned	Unassigned	440_0	Clustered	7	VC_440_0	7	0.8665	1	0.8665	1	1	1	1
IMG|UGV-GENOME-0001201	Unassigned	Unassigned	Unassigned	440_0	Clustered	7	VC_440_0	7	0.8665	1	0.8665	1	1	1	1
IMG|UGV-GENOME-0179807_1	Unassigned	Unassigned	Unassigned	397_0	Clustered	4	VC_397_0	4	0.9235	0.997463	0.9212	1	1	1	1
IMG|UGV-GENOME-0189063	Unassigned	Unassigned	Unassigned	324_0	Clustered	61	VC_324_0	61	0.6933	1	0.6933	1	1	1	1
IMG|UGV-GENOME-0200618	Unassigned	Unassigned	Unassigned	358_0	Clustered	25	VC_358_0	25	0.7076	1	0.7076	1	1	1	0.8267
IMG|UGV-GENOME-0209861	Unassigned	Unassigned	Unassigned	324_0	Clustered	61	VC_324_0	61	0.6933	1	0.6933	1	1	1	1
IMG|UGV-GENOME-0226971	Unassigned	Unassigned	Unassigned	358_0	Clustered	25	VC_358_0	25	0.7076	1	0.7076	1	1	1	0.8267
IMG|UGV-GENOME-0228900	Unassigned	Unassigned	Unassigned	358_0	Clustered	25	VC_358_0	25	0.7076	1	0.7076	1	1	1	0.8267
IMG|UGV-GENOME-0231656	Unassigned	Unassigned	Unassigned	324_0	Clustered	61	VC_324_0	61	0.6933	1	0.6933	1	1	1	1
IMG|UGV-GENOME-0239406	Unassigned	Unassigned	Unassigned	359_0	Clustered	22	VC_359_0	22	0.745	1	0.745	1	1	1	1
IMG|UGV-GENOME-0240165	Unassigned	Unassigned	Unassigned	324_0	Clustered	61	VC_324_0	61	0.6933	1	0.6933	1	1	1	1
IMG|UGV-GENOME-0255461	Unassigned	Unassigned	Unassigned	324_0	Clustered	61	VC_324_0	61	0.6933	1	0.6933	1	1	1	1
IMG|UGV-GENOME-0255724	Unassigned	Unassigned	Unassigned	324_0	Clustered	61	VC_324_0	61	0.6933	1	0.6933	1	1	1	1
IMG|UGV-GENOME-0256087	Unassigned	Unassigned	Unassigned	324_0	Clustered	61	VC_324_0	61	0.6933	1	0.6933	1	1	1	1
IMG|UGV-GENOME-0256185	Unassigned	Unassigned	Unassigned	324_0	Clustered	61	VC_324_0	61	0.6933	1	0.6933	1	1	1	1
IMG|UGV-GENOME-0257216	Unassigned	Unassigned	Unassigned	324_0	Clustered	61	VC_324_0	61	0.6933	1	0.6933	1	1	1	1
IMG|UGV-GENOME-0257348	Unassigned	Unassigned	Unassigned	324_0	Clustered	61	VC_324_0	61	0.6933	1	0.6933	1	1	1	1
IMG|UGV-GENOME-0257711	Unassigned	Unassigned	Unassigned	324_0	Clustered	61	VC_324_0	61	0.6933	1	0.6933	1	1	1	1
IMG|UGV-GENOME-0258495	Unassigned	Unassigned	Unassigned	324_0	Clustered	61	VC_324_0	61	0.6933	1	0.6933	1	1	1	1
IMG|UGV-GENOME-0260234	Unassigned	Unassigned	Unassigned	324_0	Clustered	61	VC_324_0	61	0.6933	1	0.6933	1	1	1	1
IMG|UGV-GENOME-0260310	Unassigned	Unassigned	Unassigned	324_0	Clustered	61	VC_324_0	61	0.6933	1	0.6933	1	1	1	1
IMG|UGV-GENOME-0262162	Unassigned	Unassigned	Unassigned	324_0	Clustered	61	VC_324_0	61	0.6933	1	0.6933	1	1	1	1
IMG|UGV-GENOME-0262696_1	Unassigned	Unassigned	Unassigned	324_0	Clustered	61	VC_324_0	61	0.6933	1	0.6933	1	1	1	1
IMG|UGV-GENOME-0263128	Unassigned	Unassigned	Unassigned	324_0	Clustered	61	VC_324_0	61	0.6933	1	0.6933	1	1	1	1
IMG|UGV-GENOME-0264891	Unassigned	Unassigned	Unassigned	324_0	Clustered	61	VC_324_0	61	0.6933	1	0.6933	1	1	1	1
IMG|UGV-GENOME-0266066	Unassigned	Unassigned	Unassigned	324_0	Clustered	61	VC_324_0	61	0.6933	1	0.6933	1	1	1	1
IMG|UGV-GENOME-0268635_1	Unassigned	Unassigned	Unassigned	324_0	Clustered	61	VC_324_0	61	0.6933	1	0.6933	1	1	1	1
IMG|UGV-GENOME-0271153	Unassigned	Unassigned	Unassigned	323_0	Clustered	23	VC_323_0	23	0.4894	1	0.4894	1	1	1	1
IMG|UGV-GENOME-0271425	Unassigned	Unassigned	Unassigned	359_0	Clustered	22	VC_359_0	22	0.745	1	0.745	1	1	1	1
IMG|UGV-GENOME-0271646	Unassigned	Unassigned	Unassigned	323_0	Clustered	23	VC_323_0	23	0.4894	1	0.4894	1	1	1	1
IMG|UGV-GENOME-0274814	Unassigned	Unassigned	Unassigned	324_0	Clustered	61	VC_324_0	61	0.6933	1	0.6933	1	1	1	1
IMG|UGV-GENOME-0303866	Unassigned	Unassigned	Unassigned	359_0	Clustered	22	VC_359_0	22	0.745	1	0.745	1	1	1	1
IMG|UGV-GENOME-0309168	Unassigned	Unassigned	Unassigned	323_0	Clustered	23	VC_323_0	23	0.4894	1	0.4894	1	1	1	1
IMG|UGV-GENOME-0313195	Unassigned	Unassigned	Unassigned	359_0	Clustered	22	VC_359_0	22	0.745	1	0.745	1	1	1	1
IMG|UGV-GENOME-0318191	Unassigned	Unassigned	Unassigned	358_0	Clustered	25	VC_358_0	25	0.7076	1	0.7076	1	1	1	0.8267
IMG|UGV-GENOME-0318983	Unassigned	Unassigned	Unassigned	359_0	Clustered	22	VC_359_0	22	0.745	1	0.745	1	1	1	1
IMG|UGV-GENOME-0320937_1	Unassigned	Unassigned	Unassigned	359_0	Clustered	22	VC_359_0	22	0.745	1	0.745	1	1	1	1
IMG|UGV-GENOME-0327529	Unassigned	Unassigned	Unassigned	370_0	Clustered	7	VC_370_0	7	0.369	1	0.369	1	1	1	1
IMG|UGV-GENOME-0373642	Unassigned	Unassigned	Unassigned	392_0	Clustered	3	VC_392_0	3	0.8025	0.997489	0.8005	1	1	1	1
IMG|UGV-GENOME-0374504	Unassigned	Unassigned	Unassigned	392_0	Clustered	3	VC_392_0	3	0.8025	0.997489	0.8005	1	1	1	1
IMG|UGV-GENOME-0375013	Unassigned	Unassigned	Unassigned	392_0	Clustered	3	VC_392_0	3	0.8025	0.997489	0.8005	1	1	1	1
IMG|UGV-GENOME-2640363	Unassigned	Unassigned	Unassigned	441_0	Clustered	4	VC_441_0	4	0.616	0.999999	0.616	1	1	1	1
IMG|UGV-GENOME-2871376	Unassigned	Unassigned	Unassigned	441_0	Clustered	4	VC_441_0	4	0.616	0.999999	0.616	1	1	1	1
IMG|UGV-GENOME-4414252	Unassigned	Unassigned	Unassigned	324_0	Clustered	61	VC_324_0	61	0.6933	1	0.6933	1	1	1	1
IMG|UGV-GENOME-4415077	Unassigned	Unassigned	Unassigned	324_0	Clustered	61	VC_324_0	61	0.6933	1	0.6933	1	1	1	1
IMG|UGV-GENOME-4415268	Unassigned	Unassigned	Unassigned	324_0	Clustered	61	VC_324_0	61	0.6933	1	0.6933	1	1	1	1
IMG|UGV-GENOME-4426261	Unassigned	Unassigned	Unassigned	358_0	Clustered	25	VC_358_0	25	0.7076	1	0.7076	1	1	1	0.8267
IMG|Yinda_HP22_trimmed_NODE_10_length_49556_cov_108.480657	Unassigned	Unassigned	Unassigned	359_0	Clustered	22	VC_359_0	22	0.745	1	0.745	1	1	1	1
Idiomarinaceae~phage~Phi1M2-2	Caudovirales	Siphoviridae	Unassigned	96_0	Clustered	5	VC_96_0	5	0.2208	0.993352	0.2193	1	1	1	1
Iodobacter~phage~PhiPLPE	Caudovirales	Myoviridae	Iodovirus	103_0	Clustered	8	VC_103_0	8	0.8711	1	0.8711	4	1	1	0.8571
Klebsiella~phage~1513	Caudovirales	Siphoviridae	Kp36virus	273_0	Clustered	18	VC_273_0	18	0.5114	1	0.5114	2	2	1	1
Klebsiella~phage~2044-307w	Caudovirales	Autographiviridae	Przondovirus	279_0	Clustered	22	VC_279_0	22	0.7193	1	0.7193	2	2	1	1
Klebsiella~phage~3~LV-2017	Caudovirales	Myoviridae	Peduovirus	108_0	Clustered	44	VC_108_0	44	0.8526	1	0.8526	14	1	1	1
Klebsiella~phage~4~LV-2017	Caudovirales	Myoviridae	Peduovirus	108_0	Clustered	44	VC_108_0	44	0.8526	1	0.8526	14	1	1	1
Klebsiella~phage~AltoGao	Caudovirales	Autographiviridae	Drulisvirus	314_0	Clustered	21	VC_314_0	21	0.7496	1	0.7496	3	2	1	1
Klebsiella~phage~F19	Caudovirales	Podoviridae	Kp34virus	314_0	Clustered	21	VC_314_0	21	0.7496	1	0.7496	3	2	1	1
Klebsiella~phage~GH-K3	Caudovirales	Drexlerviridae	Webervirus	273_0	Clustered	18	VC_273_0	18	0.5114	1	0.5114	2	2	1	1
Klebsiella~phage~Henu1	Caudovirales	Autographiviridae	Przondovirus	279_0	Clustered	22	VC_279_0	22	0.7193	1	0.7193	2	2	1	1
Klebsiella~phage~JD001	Caudovirales	Myoviridae	Jedunavirus	103_0	Clustered	8	VC_103_0	8	0.8711	1	0.8711	4	1	1	0.8571
Klebsiella~phage~JD18	Caudovirales	Myoviridae	Jd18virus	41_10	Clustered	2	VC_41_10	2	0.0107	0.954199	0.0102	2	1	1	1
Klebsiella~phage~K11	Caudovirales	Podoviridae	Kp32virus	279_0	Clustered	22	VC_279_0	22	0.7193	1	0.7193	2	2	1	1
Klebsiella~phage~K5	Caudovirales	Podoviridae	Kp32virus	279_0	Clustered	22	VC_279_0	22	0.7193	1	0.7193	2	2	1	1
Klebsiella~phage~K5-2	Caudovirales	Autographiviridae	Przondovirus	279_0	Clustered	22	VC_279_0	22	0.7193	1	0.7193	2	2	1	1
Klebsiella~phage~K5-4	Caudovirales	Autographiviridae	Przondovirus	279_0	Clustered	22	VC_279_0	22	0.7193	1	0.7193	2	2	1	1
Klebsiella~phage~KLPN1	Caudovirales	Siphoviridae	Kp36virus	273_0	Clustered	18	VC_273_0	18	0.5114	1	0.5114	2	2	1	1
Klebsiella~phage~KOX1	Caudovirales	Drexlerviridae	Webervirus	273_0	Clustered	18	VC_273_0	18	0.5114	1	0.5114	2	2	1	1
Klebsiella~phage~KP-Rio/2015	Caudovirales	Autographiviridae	Drulisvirus	314_0	Clustered	21	VC_314_0	21	0.7496	1	0.7496	3	2	1	1
Klebsiella~phage~KP15	Caudovirales	Myoviridae	Kp15virus	42_0	Clustered	6	VC_42_0	6	0.1405	1	0.1405	2	1	1	1
Klebsiella~phage~KP27	Caudovirales	Myoviridae	Kp15virus	42_0	Clustered	6	VC_42_0	6	0.1405	1	0.1405	2	1	1	1
Klebsiella~phage~KP32	Caudovirales	Podoviridae	Kp32virus	279_0	Clustered	22	VC_279_0	22	0.7193	1	0.7193	2	2	1	1
Klebsiella~phage~KP34	Caudovirales	Podoviridae	Kp34virus	314_0	Clustered	21	VC_314_0	21	0.7496	1	0.7496	3	2	1	1
Klebsiella~phage~KP36	Caudovirales	Siphoviridae	Kp36virus	273_0	Clustered	18	VC_273_0	18	0.5114	1	0.5114	2	2	1	1
Klebsiella~phage~KP8	Caudovirales	Podoviridae	Gamaleyavirus	7_0	Clustered	20	VC_7_0	20	0.5726	1	0.5726	7	1	1	0.8316
Klebsiella~phage~KPN~N137	Caudovirales	Siphoviridae	Unassigned	18_0	Clustered	20	VC_18_0	20	0.8567	1	0.8567	2	2	2	1
Klebsiella~phage~KPN~N141	Caudovirales	Drexlerviridae	Webervirus	273_0	Clustered	18	VC_273_0	18	0.5114	1	0.5114	2	2	1	1
Klebsiella~phage~KPV811	Caudovirales	Autographiviridae	Drulisvirus	314_0	Clustered	21	VC_314_0	21	0.7496	1	0.7496	3	2	1	1
Klebsiella~phage~Kp2	Caudovirales	Podoviridae	Kp34virus	314_0	Clustered	21	VC_314_0	21	0.7496	1	0.7496	3	2	1	1
Klebsiella~phage~KpCHEMY26	Caudovirales	Podoviridae	Ithacavirus	11_0	Clustered	5	VC_11_0	5	0.2538	1	0.2538	2	1	1	1
Klebsiella~phage~KpKT21phi1	Caudovirales	Drexlerviridae	Webervirus	273_0	Clustered	18	VC_273_0	18	0.5114	1	0.5114	2	2	1	1
Klebsiella~phage~KpV41	Caudovirales	Podoviridae	Kp34virus	314_0	Clustered	21	VC_314_0	21	0.7496	1	0.7496	3	2	1	1
Klebsiella~phage~KpV475	Caudovirales	Podoviridae	Kp34virus	314_0	Clustered	21	VC_314_0	21	0.7496	1	0.7496	3	2	1	1
Klebsiella~phage~KpV71	Caudovirales	Podoviridae	Kp34virus	314_0	Clustered	21	VC_314_0	21	0.7496	1	0.7496	3	2	1	1
Klebsiella~phage~Magnus	Caudovirales	Ackermannviridae	Taipeivirus	33_0	Clustered	8	VC_33_0	8	0.0659	0.996053	0.0657	1	1	1	0.9643
Klebsiella~phage~Marfa	Caudovirales	Myoviridae	Unassigned	41_2	Clustered	2	VC_41_2	2	0.0107	0.953302	0.0102	1	1	1	1
Klebsiella~phage~Matisse	Caudovirales	Myoviridae	Kp15virus	42_0	Clustered	6	VC_42_0	6	0.1405	1	0.1405	2	1	1	1
Klebsiella~phage~May	Caudovirales	Ackermannviridae	Taipeivirus	33_0	Clustered	8	VC_33_0	8	0.0659	0.996053	0.0657	1	1	1	0.9643
Klebsiella~phage~Menlow	Caudovirales	Ackermannviridae	Taipeivirus	33_0	Clustered	8	VC_33_0	8	0.0659	0.996053	0.0657	1	1	1	0.9643
Klebsiella~phage~MezzoGao	Caudovirales	Drexlerviridae	Webervirus	273_0	Clustered	18	VC_273_0	18	0.5114	1	0.5114	2	2	1	1
Klebsiella~phage~Miro	Caudovirales	Myoviridae	Kp15virus	42_0	Clustered	6	VC_42_0	6	0.1405	1	0.1405	2	1	1	1
Klebsiella~phage~NJR15	Caudovirales	Drexlerviridae	Webervirus	273_0	Clustered	18	VC_273_0	18	0.5114	1	0.5114	2	2	1	1
Klebsiella~phage~NJS1	Caudovirales	Drexlerviridae	Webervirus	273_0	Clustered	18	VC_273_0	18	0.5114	1	0.5114	2	2	1	1
Klebsiella~phage~NJS2	Caudovirales	Drexlerviridae	Webervirus	273_0	Clustered	18	VC_273_0	18	0.5114	1	0.5114	2	2	1	1
Klebsiella~phage~NTUH-K2044-K1-1	Caudovirales	Podoviridae	Kp34virus	314_0	Clustered	21	VC_314_0	21	0.7496	1	0.7496	3	2	1	1
Klebsiella~phage~PKO111	Caudovirales	Myoviridae	Jd18virus	41_11	Clustered/Singleton	1	VC_41_11	1	0	1	0	1	1	1	1
Klebsiella~phage~PKP126	Caudovirales	Siphoviridae	Kp36virus	273_0	Clustered	18	VC_273_0	18	0.5114	1	0.5114	2	2	1	1
Klebsiella~phage~PMBT1	Caudovirales	Myoviridae	Slopekvirus	42_0	Clustered	6	VC_42_0	6	0.1405	1	0.1405	2	1	1	1
Klebsiella~phage~Pharr	Caudovirales	Autographiviridae	Przondovirus	279_0	Clustered	22	VC_279_0	22	0.7193	1	0.7193	2	2	1	1
Klebsiella~phage~Pylas	Caudovirales	Podoviridae	Ithacavirus	11_0	Clustered	5	VC_11_0	5	0.2538	1	0.2538	2	1	1	1
Klebsiella~phage~SH-Kp~152410	Caudovirales	Autographiviridae	Przondovirus	279_0	Clustered	22	VC_279_0	22	0.7193	1	0.7193	2	2	1	1
Klebsiella~phage~ST13-OXA48phi12.1	Caudovirales	Myoviridae	Peduovirus	108_0	Clustered	44	VC_108_0	44	0.8526	1	0.8526	14	1	1	1
Klebsiella~phage~ST147-VIM1phi7.1	Caudovirales	Myoviridae	Peduovirus	108_0	Clustered	44	VC_108_0	44	0.8526	1	0.8526	14	1	1	1
Klebsiella~phage~ST15-OXA48phi14.1	Caudovirales	Myoviridae	Peduovirus	108_0	Clustered	44	VC_108_0	44	0.8526	1	0.8526	14	1	1	1
Klebsiella~phage~ST16-OXA48phi5.4	Caudovirales	Myoviridae	Peduovirus	108_0	Clustered	44	VC_108_0	44	0.8526	1	0.8526	14	1	1	1
Klebsiella~phage~ST437-OXA245phi4.1	Caudovirales	Myoviridae	Peduovirus	108_0	Clustered	44	VC_108_0	44	0.8526	1	0.8526	14	1	1	1
Klebsiella~phage~ST437-OXA245phi4.2	Caudovirales	Myoviridae	Peduovirus	108_0	Clustered	44	VC_108_0	44	0.8526	1	0.8526	14	1	1	1
Klebsiella~phage~ST512-KPC3phi13.2	Caudovirales	Myoviridae	Peduovirus	108_0	Clustered	44	VC_108_0	44	0.8526	1	0.8526	14	1	1	1
Klebsiella~phage~Seifer	Caudovirales	Siphoviridae	Unassigned	18_0	Clustered	20	VC_18_0	20	0.8567	1	0.8567	2	2	2	1
Klebsiella~phage~Soft	Caudovirales	Siphoviridae	Unassigned	18_0	Clustered	20	VC_18_0	20	0.8567	1	0.8567	2	2	2	1
Klebsiella~phage~Sushi	Caudovirales	Siphoviridae	Kp36virus	273_0	Clustered	18	VC_273_0	18	0.5114	1	0.5114	2	2	1	1
Klebsiella~phage~TAH8	Caudovirales	Drexlerviridae	Webervirus	273_0	Clustered	18	VC_273_0	18	0.5114	1	0.5114	2	2	1	1
Klebsiella~phage~TSK1	Caudovirales	Drexlerviridae	Webervirus	273_0	Clustered	18	VC_273_0	18	0.5114	1	0.5114	2	2	1	1
Klebsiella~phage~ZCKP1	Caudovirales	Myoviridae	Phapecoctavirus	69_0	Clustered	5	VC_69_0	5	0.371	1	0.371	1	1	1	1
Klebsiella~phage~kpssk3	Caudovirales	Autographiviridae	Przondovirus	279_0	Clustered	22	VC_279_0	22	0.7193	1	0.7193	2	2	1	1
Klebsiella~phage~myPSH1235	Caudovirales	Autographiviridae	Drulisvirus	314_0	Clustered	21	VC_314_0	21	0.7496	1	0.7496	3	2	1	1
Klebsiella~phage~phiBO1E	Caudovirales	Autographiviridae	Drulisvirus	314_0	Clustered	21	VC_314_0	21	0.7496	1	0.7496	3	2	1	1
Klebsiella~phage~phiKO2	Caudovirales	Siphoviridae	Unassigned	241_0	Clustered	2	VC_241_0	2	0.2148	0.941977	0.2023	1	1	1	1
Klebsiella~phage~phiKpS2	Caudovirales	Autographiviridae	Drulisvirus	314_0	Clustered	21	VC_314_0	21	0.7496	1	0.7496	3	2	1	1
Klebsiella~phage~vB_KleM_RaK2	Caudovirales	Myoviridae	Alcyoneusvirus	114_5	Clustered/Singleton	1	VC_114_5	1	0	1	0	1	1	1	1
Klebsiella~phage~vB_Kp1	Caudovirales	Podoviridae	Kp32virus	279_0	Clustered	22	VC_279_0	22	0.7193	1	0.7193	2	2	1	1
Klebsiella~phage~vB_KpnM_BIS47	Caudovirales	Myoviridae	Unassigned	68_1	Clustered	5	VC_68_1	5	0.1412	0.999999	0.1412	1	1	1	1
Klebsiella~phage~vB_KpnM_KB57	Caudovirales	Myoviridae	Unassigned	68_1	Clustered	5	VC_68_1	5	0.1412	0.999999	0.1412	1	1	1	1
Klebsiella~phage~vB_KpnM_KpV477	Caudovirales	Myoviridae	Jiaodavirus	41_10	Clustered	2	VC_41_10	2	0.0107	0.954199	0.0102	2	1	1	1
Klebsiella~phage~vB_KpnM_KpV52	Caudovirales	Myoviridae	Jedunavirus	103_0	Clustered	8	VC_103_0	8	0.8711	1	0.8711	4	1	1	0.8571
Klebsiella~phage~vB_KpnM_KpV79	Caudovirales	Myoviridae	Jedunavirus	103_0	Clustered	8	VC_103_0	8	0.8711	1	0.8711	4	1	1	0.8571
Klebsiella~phage~vB_KpnP_BIS33	Caudovirales	Autographiviridae	Przondovirus	279_0	Clustered	22	VC_279_0	22	0.7193	1	0.7193	2	2	1	1
Klebsiella~phage~vB_KpnP_IL33	Caudovirales	Autographiviridae	Przondovirus	279_0	Clustered	22	VC_279_0	22	0.7193	1	0.7193	2	2	1	1
Klebsiella~phage~vB_KpnP_IME205	Caudovirales	Autographiviridae	Przondovirus	279_0	Clustered	22	VC_279_0	22	0.7193	1	0.7193	2	2	1	1
Klebsiella~phage~vB_KpnP_IME321	Caudovirales	Autographiviridae	Przondovirus	279_0	Clustered	22	VC_279_0	22	0.7193	1	0.7193	2	2	1	1
Klebsiella~phage~vB_KpnP_KpV289	Caudovirales	Podoviridae	Kp32virus	279_0	Clustered	22	VC_279_0	22	0.7193	1	0.7193	2	2	1	1
Klebsiella~phage~vB_KpnP_KpV48	Caudovirales	Autographiviridae	Drulisvirus	314_0	Clustered	21	VC_314_0	21	0.7496	1	0.7496	3	2	1	1
Klebsiella~phage~vB_KpnP_KpV74	Caudovirales	Autographiviridae	Drulisvirus	314_0	Clustered	21	VC_314_0	21	0.7496	1	0.7496	3	2	1	1
Klebsiella~phage~vB_KpnP_KpV763	Caudovirales	Autographiviridae	Przondovirus	279_0	Clustered	22	VC_279_0	22	0.7193	1	0.7193	2	2	1	1
Klebsiella~phage~vB_KpnP_KpV766	Caudovirales	Autographiviridae	Przondovirus	279_0	Clustered	22	VC_279_0	22	0.7193	1	0.7193	2	2	1	1
Klebsiella~phage~vB_KpnP_KpV767	Caudovirales	Autographiviridae	Przondovirus	279_0	Clustered	22	VC_279_0	22	0.7193	1	0.7193	2	2	1	1
Klebsiella~phage~vB_KpnP_PRA33	Caudovirales	Autographiviridae	Przondovirus	279_0	Clustered	22	VC_279_0	22	0.7193	1	0.7193	2	2	1	1
Klebsiella~phage~vB_KpnP_SU503	Caudovirales	Podoviridae	Kp34virus	314_0	Clustered	21	VC_314_0	21	0.7496	1	0.7496	3	2	1	1
Klebsiella~phage~vB_KpnP_SU552A	Caudovirales	Podoviridae	Kp34virus	314_0	Clustered	21	VC_314_0	21	0.7496	1	0.7496	3	2	1	1
Klebsiella~phage~vB_KpnS_IME279	Caudovirales	Podoviridae	Sortsnevirus	220_0	Clustered	6	VC_220_0	6	0.6777	1	0.6777	4	2	1	1
Klebsiella~phage~vB_KpnS_KpV522	Caudovirales	Drexlerviridae	Webervirus	273_0	Clustered	18	VC_273_0	18	0.5114	1	0.5114	2	2	1	1
Klebsiella~phage~vB_Kpn_F48	Caudovirales	Myoviridae	Unassigned	41_2	Clustered	2	VC_41_2	2	0.0107	0.953302	0.0102	1	1	1	1
Klebsiella~phage~vB_Kpn_IME260	Caudovirales	Demerecviridae	Sugarlandvirus	91_1	Clustered/Singleton	1	VC_91_1	1	0	1	0	1	1	1	1
Klebsiella~virus~0507KN21	Caudovirales	Ackermannviridae	Taipeivirus	33_0	Clustered	8	VC_33_0	8	0.0659	0.996053	0.0657	1	1	1	0.9643
Klebsiella~virus~GML-KpCol1	Caudovirales	Drexlerviridae	Webervirus	273_0	Clustered	18	VC_273_0	18	0.5114	1	0.5114	2	2	1	1
Klebsiella~virus~KP32	Caudovirales	Podoviridae	Kp32virus	279_0	Clustered	22	VC_279_0	22	0.7193	1	0.7193	2	2	1	1
Klebsiella~virus~KpS8	Caudovirales	Myoviridae	Unassigned	68_1	Clustered	5	VC_68_1	5	0.1412	0.999999	0.1412	1	1	1	1
Klebsiella~virus~UPM~2146	Caudovirales	Ackermannviridae	Taipeivirus	33_0	Clustered	8	VC_33_0	8	0.0659	0.996053	0.0657	1	1	1	0.9643
Klebsiella~virus~vB_KpnM_KpS110	Caudovirales	Ackermannviridae	Taipeivirus	33_0	Clustered	8	VC_33_0	8	0.0659	0.996053	0.0657	1	1	1	0.9643
Kluyvera~phage~Kvp1	Caudovirales	Podoviridae	T7virus	276_0	Clustered	59	VC_276_0	59	0.7562	1	0.7562	11	2	1	1
Lactobacillus~phage~3-521	Caudovirales	Herelleviridae	Unassigned	172_2	Clustered/Singleton	1	VC_172_2	1	0	1	0	1	1	1	1
Lactobacillus~phage~521B	Caudovirales	Herelleviridae	Unassigned	182_0	Clustered	2	VC_182_0	2	0.1339	0.9561	0.1281	1	1	1	1
Lactobacillus~phage~A2	Caudovirales	Siphoviridae	Unassigned	346_0	Clustered	9	VC_346_0	9	0.498	1	0.498	1	1	1	0.9444
Lactobacillus~phage~ATCC~8014-B2	Caudovirales	Siphoviridae	Douglaswolinvirus	442_1	Clustered	4	VC_442_1	4	0.3641	0.999971	0.3641	2	1	1	1
Lactobacillus~phage~BH1	Caudovirales	Siphoviridae	Unassigned	346_0	Clustered	9	VC_346_0	9	0.498	1	0.498	1	1	1	0.9444
Lactobacillus~phage~Bacchae	Caudovirales	Herelleviridae	Harbinvirus	172_0	Clustered	4	VC_172_0	4	0.3054	0.999984	0.3054	1	1	1	1
Lactobacillus~phage~Bromius	Caudovirales	Herelleviridae	Harbinvirus	172_0	Clustered	4	VC_172_0	4	0.3054	0.999984	0.3054	1	1	1	1
Lactobacillus~phage~Iacchus	Caudovirales	Herelleviridae	Harbinvirus	172_0	Clustered	4	VC_172_0	4	0.3054	0.999984	0.3054	1	1	1	1
Lactobacillus~phage~J-1	Caudovirales	Siphoviridae	Unassigned	346_0	Clustered	9	VC_346_0	9	0.498	1	0.498	1	1	1	0.9444
Lactobacillus~phage~KC5a	Caudovirales	Myoviridae	Unassigned	229_0	Clustered	4	VC_229_0	4	0.7339	0.999958	0.7338	1	1	1	1
Lactobacillus~phage~LF1	Caudovirales	Siphoviridae	Unassigned	444_0	Clustered	2	VC_444_0	2	0.1304	0.941661	0.1228	1	1	1	1
Lactobacillus~phage~LJ	Caudovirales	Siphoviridae	Unassigned	346_0	Clustered	9	VC_346_0	9	0.498	1	0.498	1	1	1	0.9444
Lactobacillus~phage~LL-H	Caudovirales	Siphoviridae	Unassigned	176_0	Clustered	2	VC_176_0	2	0.2575	0.948904	0.2444	1	1	1	1
Lactobacillus~phage~Lc-Nu	Caudovirales	Siphoviridae	Unassigned	346_0	Clustered	9	VC_346_0	9	0.498	1	0.498	1	1	1	0.9444
Lactobacillus~phage~Ld17	Caudovirales	Siphoviridae	C5virus	351_0	Clustered	6	VC_351_0	6	0.9995	0.935839	0.9354	1	1	1	1
Lactobacillus~phage~Ld25A	Caudovirales	Siphoviridae	C5virus	351_0	Clustered	6	VC_351_0	6	0.9995	0.935839	0.9354	1	1	1	1
Lactobacillus~phage~Ld3	Caudovirales	Siphoviridae	C5virus	351_0	Clustered	6	VC_351_0	6	0.9995	0.935839	0.9354	1	1	1	1
Lactobacillus~phage~Ldl1	Caudovirales	Siphoviridae	Lidleunavirus	447_0	Clustered	2	VC_447_0	2	0.224	0.942513	0.2111	1	1	1	1
Lactobacillus~phage~Lenus	Caudovirales	Siphoviridae	Lenusvirus	442_0	Clustered	3	VC_442_0	3	0.3135	0.997897	0.3128	1	1	1	1
Lactobacillus~phage~Lpa804	Caudovirales	Herelleviridae	Harbinvirus	172_1	Clustered	3	VC_172_1	3	0.1203	0.995491	0.1198	2	2	1	0.6667
Lactobacillus~phage~LpeD	Caudovirales	Herelleviridae	Unassigned	172_1	Clustered	3	VC_172_1	3	0.1203	0.995491	0.1198	2	2	1	0.6667
Lactobacillus~phage~Lrm1	Caudovirales	Siphoviridae	Unassigned	346_0	Clustered	9	VC_346_0	9	0.498	1	0.498	1	1	1	0.9444
Lactobacillus~phage~Maenad	Caudovirales	Siphoviridae	Maenadvirus	442_1	Clustered	4	VC_442_1	4	0.3641	0.999971	0.3641	2	1	1	1
Lactobacillus~phage~Nyseid	Caudovirales	Siphoviridae	Lenusvirus	442_0	Clustered	3	VC_442_0	3	0.3135	0.997897	0.3128	1	1	1	1
Lactobacillus~phage~P1	Caudovirales	Siphoviridae	Maenadvirus	442_1	Clustered	4	VC_442_1	4	0.3641	0.999971	0.3641	2	1	1	1
Lactobacillus~phage~PL-1	Caudovirales	Siphoviridae	Unassigned	346_0	Clustered	9	VC_346_0	9	0.498	1	0.498	1	1	1	0.9444
Lactobacillus~phage~PLE2	Caudovirales	Siphoviridae	Unassigned	194_0	Clustered	2	VC_194_0	2	0.3432	0.939818	0.3225	1	1	1	1
Lactobacillus~phage~SA-C12	Caudovirales	Siphoviridae	Lenusvirus	442_0	Clustered	3	VC_442_0	3	0.3135	0.997897	0.3128	1	1	1	1
Lactobacillus~phage~SAC12B	Caudovirales	Herelleviridae	Unassigned	182_0	Clustered	2	VC_182_0	2	0.1339	0.9561	0.1281	1	1	1	1
Lactobacillus~phage~Satyr	Caudovirales	Siphoviridae	Maenadvirus	442_1	Clustered	4	VC_442_1	4	0.3641	0.999971	0.3641	2	1	1	1
Lactobacillus~phage~Semele	Caudovirales	Herelleviridae	Harbinvirus	172_0	Clustered	4	VC_172_0	4	0.3054	0.999984	0.3054	1	1	1	1
Lactobacillus~phage~T25	Caudovirales	Siphoviridae	Unassigned	346_0	Clustered	9	VC_346_0	9	0.498	1	0.498	1	1	1	0.9444
Lactobacillus~phage~ViSo-2018a	Caudovirales	Siphoviridae	Lidleunavirus	447_0	Clustered	2	VC_447_0	2	0.224	0.942513	0.2111	1	1	1	1
Lactobacillus~phage~iA2	Caudovirales	Siphoviridae	Unassigned	194_0	Clustered	2	VC_194_0	2	0.3432	0.939818	0.3225	1	1	1	1
Lactobacillus~phage~phi~jlb1	Caudovirales	Myoviridae	Unassigned	229_0	Clustered	4	VC_229_0	4	0.7339	0.999958	0.7338	1	1	1	1
Lactobacillus~phage~phiAQ113	Caudovirales	Myoviridae	Unassigned	229_0	Clustered	4	VC_229_0	4	0.7339	0.999958	0.7338	1	1	1	1
Lactobacillus~phage~phiAT3	Caudovirales	Siphoviridae	Unassigned	346_0	Clustered	9	VC_346_0	9	0.498	1	0.498	1	1	1	0.9444
Lactobacillus~phage~phiJB	Caudovirales	Siphoviridae	Unassigned	176_0	Clustered	2	VC_176_0	2	0.2575	0.948904	0.2444	1	1	1	1
Lactobacillus~phage~phiLdb	Caudovirales	Siphoviridae	C5virus	351_0	Clustered	6	VC_351_0	6	0.9995	0.935839	0.9354	1	1	1	1
Lactobacillus~phage~phiPYB5	Caudovirales	Siphoviridae	Unassigned	444_0	Clustered	2	VC_444_0	2	0.1304	0.941661	0.1228	1	1	1	1
Lactobacillus~prophage~Lj771	Caudovirales	Myoviridae	Unassigned	229_0	Clustered	4	VC_229_0	4	0.7339	0.999958	0.7338	1	1	1	1
Lactobacillus~virus~ATCC8014	Caudovirales	Siphoviridae	Phijl1virus	125_0	Clustered	3	VC_125_0	3	0.8641	0.993634	0.8586	1	1	1	1
Lactobacillus~virus~LLKu	Caudovirales	Siphoviridae	C5virus	351_0	Clustered	6	VC_351_0	6	0.9995	0.935839	0.9354	1	1	1	1
Lactobacillus~virus~LP65	Caudovirales	Myoviridae	Unassigned	172_1	Clustered	3	VC_172_1	3	0.1203	0.995491	0.1198	2	2	1	0.6667
Lactobacillus~virus~c5	Caudovirales	Siphoviridae	C5virus	351_0	Clustered	6	VC_351_0	6	0.9995	0.935839	0.9354	1	1	1	1
Lactobacillus~virus~phiJL1	Caudovirales	Siphoviridae	Phijl1virus	125_0	Clustered	3	VC_125_0	3	0.8641	0.993634	0.8586	1	1	1	1
Lactococcus~lactis~phage~P475	Caudovirales	Siphoviridae	Skunavirus	449_0	Clustered	97	VC_449_0	97	1	0.992826	0.9928	2	1	1	1
Lactococcus~lactis~phage~p272	Caudovirales	Siphoviridae	Skunavirus	449_0	Clustered	97	VC_449_0	97	1	0.992826	0.9928	2	1	1	1
Lactococcus~phage~05601	Caudovirales	Siphoviridae	Skunavirus	449_0	Clustered	97	VC_449_0	97	1	0.992826	0.9928	2	1	1	1
Lactococcus~phage~10W18	Caudovirales	Siphoviridae	Skunavirus	449_0	Clustered	97	VC_449_0	97	1	0.992826	0.9928	2	1	1	1
Lactococcus~phage~1358	Caudovirales	Siphoviridae	Unassigned	201_0	Clustered	3	VC_201_0	3	0.4531	0.99628	0.4514	1	1	1	1
Lactococcus~phage~13W11L	Caudovirales	Siphoviridae	Skunavirus	449_0	Clustered	97	VC_449_0	97	1	0.992826	0.9928	2	1	1	1
Lactococcus~phage~16802	Caudovirales	Siphoviridae	Skunavirus	449_0	Clustered	97	VC_449_0	97	1	0.992826	0.9928	2	1	1	1
Lactococcus~phage~16W23	Caudovirales	Siphoviridae	Skunavirus	449_0	Clustered	97	VC_449_0	97	1	0.992826	0.9928	2	1	1	1
Lactococcus~phage~30804	Caudovirales	Siphoviridae	Skunavirus	449_0	Clustered	97	VC_449_0	97	1	0.992826	0.9928	2	1	1	1
Lactococcus~phage~340	Caudovirales	Siphoviridae	Skunavirus	449_0	Clustered	97	VC_449_0	97	1	0.992826	0.9928	2	1	1	1
Lactococcus~phage~37201	Caudovirales	Siphoviridae	Skunavirus	449_0	Clustered	97	VC_449_0	97	1	0.992826	0.9928	2	1	1	1
Lactococcus~phage~38503	Caudovirales	Siphoviridae	Skunavirus	449_0	Clustered	97	VC_449_0	97	1	0.992826	0.9928	2	1	1	1
Lactococcus~phage~38507	Caudovirales	Siphoviridae	Skunavirus	449_0	Clustered	97	VC_449_0	97	1	0.992826	0.9928	2	1	1	1
Lactococcus~phage~3R16S	Caudovirales	Siphoviridae	Skunavirus	449_0	Clustered	97	VC_449_0	97	1	0.992826	0.9928	2	1	1	1
Lactococcus~phage~51701	Caudovirales	Siphoviridae	Skunavirus	449_0	Clustered	97	VC_449_0	97	1	0.992826	0.9928	2	1	1	1
Lactococcus~phage~56003	Caudovirales	Siphoviridae	Skunavirus	449_0	Clustered	97	VC_449_0	97	1	0.992826	0.9928	2	1	1	1
Lactococcus~phage~56301	Caudovirales	Siphoviridae	Skunavirus	449_0	Clustered	97	VC_449_0	97	1	0.992826	0.9928	2	1	1	1
Lactococcus~phage~57001	Caudovirales	Siphoviridae	Skunavirus	449_0	Clustered	97	VC_449_0	97	1	0.992826	0.9928	2	1	1	1
Lactococcus~phage~62601	Caudovirales	Siphoviridae	Skunavirus	449_0	Clustered	97	VC_449_0	97	1	0.992826	0.9928	2	1	1	1
Lactococcus~phage~62605	Caudovirales	Siphoviridae	Skunavirus	449_0	Clustered	97	VC_449_0	97	1	0.992826	0.9928	2	1	1	1
Lactococcus~phage~63302	Caudovirales	Siphoviridae	Skunavirus	449_0	Clustered	97	VC_449_0	97	1	0.992826	0.9928	2	1	1	1
Lactococcus~phage~66901	Caudovirales	Siphoviridae	Skunavirus	449_0	Clustered	97	VC_449_0	97	1	0.992826	0.9928	2	1	1	1
Lactococcus~phage~79201	Caudovirales	Siphoviridae	Skunavirus	449_0	Clustered	97	VC_449_0	97	1	0.992826	0.9928	2	1	1	1
Lactococcus~phage~88605	Caudovirales	Siphoviridae	Skunavirus	449_0	Clustered	97	VC_449_0	97	1	0.992826	0.9928	2	1	1	1
Lactococcus~phage~8V08	Caudovirales	Siphoviridae	Skunavirus	449_0	Clustered	97	VC_449_0	97	1	0.992826	0.9928	2	1	1	1
Lactococcus~phage~936	Caudovirales	Siphoviridae	Skunavirus	449_0	Clustered	97	VC_449_0	97	1	0.992826	0.9928	2	1	1	1
Lactococcus~phage~936~group~phage~Phi109	Caudovirales	Siphoviridae	Skunavirus	449_0	Clustered	97	VC_449_0	97	1	0.992826	0.9928	2	1	1	1
Lactococcus~phage~936~group~phage~Phi155	Caudovirales	Siphoviridae	Skunavirus	449_0	Clustered	97	VC_449_0	97	1	0.992826	0.9928	2	1	1	1
Lactococcus~phage~936~group~phage~Phi19.3	Caudovirales	Siphoviridae	Skunavirus	449_0	Clustered	97	VC_449_0	97	1	0.992826	0.9928	2	1	1	1
Lactococcus~phage~936~group~phage~Phi4.2	Caudovirales	Siphoviridae	Skunavirus	449_0	Clustered	97	VC_449_0	97	1	0.992826	0.9928	2	1	1	1
Lactococcus~phage~936~group~phage~Phi44	Caudovirales	Siphoviridae	Skunavirus	449_0	Clustered	97	VC_449_0	97	1	0.992826	0.9928	2	1	1	1
Lactococcus~phage~936~group~phage~Phi5.12	Caudovirales	Siphoviridae	Skunavirus	449_0	Clustered	97	VC_449_0	97	1	0.992826	0.9928	2	1	1	1
Lactococcus~phage~936~group~phage~Phi91127	Caudovirales	Siphoviridae	Skunavirus	449_0	Clustered	97	VC_449_0	97	1	0.992826	0.9928	2	1	1	1
Lactococcus~phage~936~group~phage~PhiA.16	Caudovirales	Siphoviridae	Skunavirus	449_0	Clustered	97	VC_449_0	97	1	0.992826	0.9928	2	1	1	1
Lactococcus~phage~936~group~phage~PhiB1127	Caudovirales	Siphoviridae	Skunavirus	449_0	Clustered	97	VC_449_0	97	1	0.992826	0.9928	2	1	1	1
Lactococcus~phage~936~group~phage~PhiE1127	Caudovirales	Siphoviridae	Skunavirus	449_0	Clustered	97	VC_449_0	97	1	0.992826	0.9928	2	1	1	1
Lactococcus~phage~936~group~phage~PhiF0139	Caudovirales	Siphoviridae	Skunavirus	449_0	Clustered	97	VC_449_0	97	1	0.992826	0.9928	2	1	1	1
Lactococcus~phage~936~group~phage~PhiJF1	Caudovirales	Siphoviridae	Skunavirus	449_0	Clustered	97	VC_449_0	97	1	0.992826	0.9928	2	1	1	1
Lactococcus~phage~936~group~phage~PhiL.18	Caudovirales	Siphoviridae	Skunavirus	449_0	Clustered	97	VC_449_0	97	1	0.992826	0.9928	2	1	1	1
Lactococcus~phage~936~group~phage~PhiL.6	Caudovirales	Siphoviridae	Skunavirus	449_0	Clustered	97	VC_449_0	97	1	0.992826	0.9928	2	1	1	1
Lactococcus~phage~936~group~phage~PhiLj	Caudovirales	Siphoviridae	Skunavirus	449_0	Clustered	97	VC_449_0	97	1	0.992826	0.9928	2	1	1	1
Lactococcus~phage~936~group~phage~PhiM1127	Caudovirales	Siphoviridae	Skunavirus	449_0	Clustered	97	VC_449_0	97	1	0.992826	0.9928	2	1	1	1
Lactococcus~phage~936~group~phage~PhiS0139	Caudovirales	Siphoviridae	Skunavirus	449_0	Clustered	97	VC_449_0	97	1	0.992826	0.9928	2	1	1	1
Lactococcus~phage~949	Caudovirales	Siphoviridae	Unassigned	212_0	Clustered	3	VC_212_0	3	0.6879	0.996618	0.6856	1	1	1	1
Lactococcus~phage~96401	Caudovirales	Siphoviridae	Skunavirus	449_0	Clustered	97	VC_449_0	97	1	0.992826	0.9928	2	1	1	1
Lactococcus~phage~96403	Caudovirales	Siphoviridae	Skunavirus	449_0	Clustered	97	VC_449_0	97	1	0.992826	0.9928	2	1	1	1
Lactococcus~phage~96603	Caudovirales	Siphoviridae	Skunavirus	449_0	Clustered	97	VC_449_0	97	1	0.992826	0.9928	2	1	1	1
Lactococcus~phage~BK5-T	Caudovirales	Siphoviridae	Unassigned	123_0	Clustered	6	VC_123_0	6	0.2281	0.999918	0.2281	1	1	1	0.7333
Lactococcus~phage~BM13	Caudovirales	Siphoviridae	Unassigned	123_0	Clustered	6	VC_123_0	6	0.2281	0.999918	0.2281	1	1	1	0.7333
Lactococcus~phage~CHPC129	Caudovirales	Siphoviridae	Skunavirus	449_0	Clustered	97	VC_449_0	97	1	0.992826	0.9928	2	1	1	1
Lactococcus~phage~CHPC361	Caudovirales	Siphoviridae	Skunavirus	449_0	Clustered	97	VC_449_0	97	1	0.992826	0.9928	2	1	1	1
Lactococcus~phage~CHPC362	Caudovirales	Siphoviridae	Skunavirus	449_0	Clustered	97	VC_449_0	97	1	0.992826	0.9928	2	1	1	1
Lactococcus~phage~CHPC52	Caudovirales	Siphoviridae	Skunavirus	449_0	Clustered	97	VC_449_0	97	1	0.992826	0.9928	2	1	1	1
Lactococcus~phage~CHPC781	Caudovirales	Siphoviridae	Skunavirus	449_0	Clustered	97	VC_449_0	97	1	0.992826	0.9928	2	1	1	1
Lactococcus~phage~CHPC958	Caudovirales	Siphoviridae	Skunavirus	449_0	Clustered	97	VC_449_0	97	1	0.992826	0.9928	2	1	1	1
Lactococcus~phage~CHPC959	Caudovirales	Siphoviridae	Skunavirus	449_0	Clustered	97	VC_449_0	97	1	0.992826	0.9928	2	1	1	1
Lactococcus~phage~CHPC964	Caudovirales	Siphoviridae	Skunavirus	449_0	Clustered	97	VC_449_0	97	1	0.992826	0.9928	2	1	1	1
Lactococcus~phage~CHPC965	Caudovirales	Siphoviridae	Skunavirus	449_0	Clustered	97	VC_449_0	97	1	0.992826	0.9928	2	1	1	1
Lactococcus~phage~CaseusJM1	Caudovirales	Siphoviridae	Skunavirus	449_0	Clustered	97	VC_449_0	97	1	0.992826	0.9928	2	1	1	1
Lactococcus~phage~D4410	Caudovirales	Siphoviridae	Ceduovirus	451_0	Clustered	7	VC_451_0	7	0.9746	0.999999	0.9746	2	1	1	1
Lactococcus~phage~D4412	Caudovirales	Siphoviridae	Ceduovirus	451_0	Clustered	7	VC_451_0	7	0.9746	0.999999	0.9746	2	1	1	1
Lactococcus~phage~GE1	Caudovirales	Siphoviridae	Unassigned	450_0	Clustered	2	VC_450_0	2	0.0443	0.54623	0.0242	1	1	1	1
Lactococcus~phage~LP0209	Caudovirales	Siphoviridae	Skunavirus	449_0	Clustered	97	VC_449_0	97	1	0.992826	0.9928	2	1	1	1
Lactococcus~phage~LP0903	Caudovirales	Siphoviridae	Skunavirus	449_0	Clustered	97	VC_449_0	97	1	0.992826	0.9928	2	1	1	1
Lactococcus~phage~LP1502a	Caudovirales	Siphoviridae	Skunavirus	449_0	Clustered	97	VC_449_0	97	1	0.992826	0.9928	2	1	1	1
Lactococcus~phage~LP8511	Caudovirales	Siphoviridae	Skunavirus	449_0	Clustered	97	VC_449_0	97	1	0.992826	0.9928	2	1	1	1
Lactococcus~phage~LP9207	Caudovirales	Siphoviridae	Skunavirus	449_0	Clustered	97	VC_449_0	97	1	0.992826	0.9928	2	1	1	1
Lactococcus~phage~LP9404	Caudovirales	Siphoviridae	Skunavirus	449_0	Clustered	97	VC_449_0	97	1	0.992826	0.9928	2	1	1	1
Lactococcus~phage~LP9609	Caudovirales	Siphoviridae	Skunavirus	449_0	Clustered	97	VC_449_0	97	1	0.992826	0.9928	2	1	1	1
Lactococcus~phage~LP9903	Caudovirales	Siphoviridae	Skunavirus	449_0	Clustered	97	VC_449_0	97	1	0.992826	0.9928	2	1	1	1
Lactococcus~phage~LP9908	Caudovirales	Siphoviridae	Skunavirus	449_0	Clustered	97	VC_449_0	97	1	0.992826	0.9928	2	1	1	1
Lactococcus~phage~M5938	Caudovirales	Siphoviridae	Ceduovirus	451_0	Clustered	7	VC_451_0	7	0.9746	0.999999	0.9746	2	1	1	1
Lactococcus~phage~M6162	Caudovirales	Siphoviridae	Ceduovirus	451_0	Clustered	7	VC_451_0	7	0.9746	0.999999	0.9746	2	1	1	1
Lactococcus~phage~M6165	Caudovirales	Siphoviridae	Ceduovirus	451_0	Clustered	7	VC_451_0	7	0.9746	0.999999	0.9746	2	1	1	1
Lactococcus~phage~MP1	Caudovirales	Siphoviridae	Skunavirus	449_0	Clustered	97	VC_449_0	97	1	0.992826	0.9928	2	1	1	1
Lactococcus~phage~MV10L	Caudovirales	Siphoviridae	Skunavirus	449_0	Clustered	97	VC_449_0	97	1	0.992826	0.9928	2	1	1	1
Lactococcus~phage~P078	Caudovirales	Siphoviridae	Unassigned	151_0	Clustered	4	VC_151_0	4	0.4043	0.999977	0.4043	1	1	1	1
Lactococcus~phage~P092	Caudovirales	Siphoviridae	Unassigned	151_0	Clustered	4	VC_151_0	4	0.4043	0.999977	0.4043	1	1	1	1
Lactococcus~phage~P118	Caudovirales	Siphoviridae	Unassigned	151_0	Clustered	4	VC_151_0	4	0.4043	0.999977	0.4043	1	1	1	1
Lactococcus~phage~P1532	Caudovirales	Siphoviridae	Skunavirus	449_0	Clustered	97	VC_449_0	97	1	0.992826	0.9928	2	1	1	1
Lactococcus~phage~P162	Caudovirales	Siphoviridae	Unassigned	151_0	Clustered	4	VC_151_0	4	0.4043	0.999977	0.4043	1	1	1	1
Lactococcus~phage~P335~sensu~lato	Caudovirales	Siphoviridae	Unassigned	123_0	Clustered	6	VC_123_0	6	0.2281	0.999918	0.2281	1	1	1	0.7333
Lactococcus~phage~P4565	Caudovirales	Siphoviridae	Skunavirus	449_0	Clustered	97	VC_449_0	97	1	0.992826	0.9928	2	1	1	1
Lactococcus~phage~P656	Caudovirales	Siphoviridae	Skunavirus	449_0	Clustered	97	VC_449_0	97	1	0.992826	0.9928	2	1	1	1
Lactococcus~phage~P680	Caudovirales	Siphoviridae	Skunavirus	449_0	Clustered	97	VC_449_0	97	1	0.992826	0.9928	2	1	1	1
Lactococcus~phage~Q54	Caudovirales	Siphoviridae	Unassigned	450_0	Clustered	2	VC_450_0	2	0.0443	0.54623	0.0242	1	1	1	1
Lactococcus~phage~R31	Caudovirales	Siphoviridae	Skunavirus	449_0	Clustered	97	VC_449_0	97	1	0.992826	0.9928	2	1	1	1
Lactococcus~phage~WP-2	Caudovirales	Podoviridae	Negarvirus	349_0	Clustered	2	VC_349_0	2	0.0362	0.950529	0.0344	2	1	1	1
Lactococcus~phage~WRP3	Caudovirales	Siphoviridae	Unassigned	212_0	Clustered	3	VC_212_0	3	0.6879	0.996618	0.6856	1	1	1	1
Lactococcus~phage~bIL285	Caudovirales	Siphoviridae	Unassigned	123_0	Clustered	6	VC_123_0	6	0.2281	0.999918	0.2281	1	1	1	0.7333
Lactococcus~phage~bIL286	Caudovirales	Siphoviridae	Unassigned	123_0	Clustered	6	VC_123_0	6	0.2281	0.999918	0.2281	1	1	1	0.7333
Lactococcus~phage~bIL309	Caudovirales	Siphoviridae	Unassigned	123_0	Clustered	6	VC_123_0	6	0.2281	0.999918	0.2281	1	1	1	0.7333
Lactococcus~phage~bIL310	Caudovirales	Siphoviridae	Unassigned	452_0	Clustered	2	VC_452_0	2	0.9091	0.5	0.4545	1	1	1	1
Lactococcus~phage~bIL312	Caudovirales	Siphoviridae	Unassigned	452_0	Clustered	2	VC_452_0	2	0.9091	0.5	0.4545	1	1	1	1
Lactococcus~phage~fd13	Caudovirales	Siphoviridae	Skunavirus	449_0	Clustered	97	VC_449_0	97	1	0.992826	0.9928	2	1	1	1
Lactococcus~phage~i0139	Caudovirales	Siphoviridae	Skunavirus	449_0	Clustered	97	VC_449_0	97	1	0.992826	0.9928	2	1	1	1
Lactococcus~phage~jm2	Caudovirales	Siphoviridae	Skunavirus	449_0	Clustered	97	VC_449_0	97	1	0.992826	0.9928	2	1	1	1
Lactococcus~phage~jm3	Caudovirales	Siphoviridae	Skunavirus	449_0	Clustered	97	VC_449_0	97	1	0.992826	0.9928	2	1	1	1
Lactococcus~phage~phi145	Caudovirales	Siphoviridae	Skunavirus	449_0	Clustered	97	VC_449_0	97	1	0.992826	0.9928	2	1	1	1
Lactococcus~phage~phi15	Caudovirales	Siphoviridae	Skunavirus	449_0	Clustered	97	VC_449_0	97	1	0.992826	0.9928	2	1	1	1
Lactococcus~phage~phi7	Caudovirales	Siphoviridae	Skunavirus	449_0	Clustered	97	VC_449_0	97	1	0.992826	0.9928	2	1	1	1
Lactococcus~phage~phiL47	Caudovirales	Siphoviridae	Unassigned	212_0	Clustered	3	VC_212_0	3	0.6879	0.996618	0.6856	1	1	1	1
Lactococcus~phage~vB_Llc_bIBB5g1	Caudovirales	Siphoviridae	Skunavirus	449_0	Clustered	97	VC_449_0	97	1	0.992826	0.9928	2	1	1	1
Lactococcus~phage~vB_Llc_bIBBF12	Caudovirales	Siphoviridae	Skunavirus	449_0	Clustered	97	VC_449_0	97	1	0.992826	0.9928	2	1	1	1
Lactococcus~virus~712	Caudovirales	Siphoviridae	Sk1virus	449_0	Clustered	97	VC_449_0	97	1	0.992826	0.9928	2	1	1	1
Lactococcus~virus~ASCC191	Caudovirales	Siphoviridae	Sk1virus	449_0	Clustered	97	VC_449_0	97	1	0.992826	0.9928	2	1	1	1
Lactococcus~virus~ASCC273	Caudovirales	Siphoviridae	Sk1virus	449_0	Clustered	97	VC_449_0	97	1	0.992826	0.9928	2	1	1	1
Lactococcus~virus~ASCC281	Caudovirales	Siphoviridae	Sk1virus	449_0	Clustered	97	VC_449_0	97	1	0.992826	0.9928	2	1	1	1
Lactococcus~virus~ASCC465	Caudovirales	Siphoviridae	Sk1virus	449_0	Clustered	97	VC_449_0	97	1	0.992826	0.9928	2	1	1	1
Lactococcus~virus~ASCC532	Caudovirales	Siphoviridae	Sk1virus	449_0	Clustered	97	VC_449_0	97	1	0.992826	0.9928	2	1	1	1
Lactococcus~virus~Bibb29	Caudovirales	Siphoviridae	Sk1virus	449_0	Clustered	97	VC_449_0	97	1	0.992826	0.9928	2	1	1	1
Lactococcus~virus~CB13	Caudovirales	Siphoviridae	Sk1virus	449_0	Clustered	97	VC_449_0	97	1	0.992826	0.9928	2	1	1	1
Lactococcus~virus~CB14	Caudovirales	Siphoviridae	Sk1virus	449_0	Clustered	97	VC_449_0	97	1	0.992826	0.9928	2	1	1	1
Lactococcus~virus~CB19	Caudovirales	Siphoviridae	Sk1virus	449_0	Clustered	97	VC_449_0	97	1	0.992826	0.9928	2	1	1	1
Lactococcus~virus~CB20	Caudovirales	Siphoviridae	Sk1virus	449_0	Clustered	97	VC_449_0	97	1	0.992826	0.9928	2	1	1	1
Lactococcus~virus~P008	Caudovirales	Siphoviridae	Sk1virus	449_0	Clustered	97	VC_449_0	97	1	0.992826	0.9928	2	1	1	1
Lactococcus~virus~P2	Caudovirales	Siphoviridae	Sk1virus	449_0	Clustered	97	VC_449_0	97	1	0.992826	0.9928	2	1	1	1
Lactococcus~virus~Sl4	Caudovirales	Siphoviridae	Sk1virus	449_0	Clustered	97	VC_449_0	97	1	0.992826	0.9928	2	1	1	1
Lactococcus~virus~bIL170	Caudovirales	Siphoviridae	Sk1virus	449_0	Clustered	97	VC_449_0	97	1	0.992826	0.9928	2	1	1	1
Lactococcus~virus~bIL67	Caudovirales	Siphoviridae	C2virus	451_0	Clustered	7	VC_451_0	7	0.9746	0.999999	0.9746	2	1	1	1
Lactococcus~virus~c2	Caudovirales	Siphoviridae	C2virus	451_0	Clustered	7	VC_451_0	7	0.9746	0.999999	0.9746	2	1	1	1
Lactococcus~virus~jj50	Caudovirales	Siphoviridae	Sk1virus	449_0	Clustered	97	VC_449_0	97	1	0.992826	0.9928	2	1	1	1
Lactococcus~virus~sk1	Caudovirales	Siphoviridae	Sk1virus	449_0	Clustered	97	VC_449_0	97	1	0.992826	0.9928	2	1	1	1
Leclercia~phage~10164-302	Caudovirales	Autographiviridae	Teetrevirus	276_0	Clustered	59	VC_276_0	59	0.7562	1	0.7562	11	2	1	1
Lelliottia~phage~phD2B	Caudovirales	Autographiviridae	Tuodvirus	284_0	Clustered	23	VC_284_0	23	0.6936	1	0.6936	7	2	1	1
Lentibacter~virus~vB_LenP_ICBM1	Caudovirales	Podoviridae	Unassigned	261_0	Clustered	4	VC_261_0	4	0.7554	0.999931	0.7553	1	1	1	1
Lentibacter~virus~vB_LenP_ICBM2	Caudovirales	Podoviridae	Unassigned	261_0	Clustered	4	VC_261_0	4	0.7554	0.999931	0.7553	1	1	1	1
Leptospira~phage~LE3	Caudovirales	Myoviridae	Unassigned	454_0	Clustered	2	VC_454_0	2	1	1	1	1	1	1	1
Leptospira~phage~LE4	Caudovirales	Myoviridae	Unassigned	454_0	Clustered	2	VC_454_0	2	1	1	1	1	1	1	1
Leuconostoc~phage~1-A4	Caudovirales	Siphoviridae	Una4virus	456_0	Clustered	7	VC_456_0	7	0.6498	1	0.6498	2	1	1	1
Leuconostoc~phage~Lmd1	Caudovirales	Siphoviridae	Lmd1virus	455_0	Clustered	6	VC_455_0	6	0.5952	1	0.5952	1	1	1	1
Leuconostoc~phage~Ln-8	Caudovirales	Siphoviridae	Una4virus	456_0	Clustered	7	VC_456_0	7	0.6498	1	0.6498	2	1	1	1
Leuconostoc~phage~Ln-9	Caudovirales	Siphoviridae	Una4virus	456_0	Clustered	7	VC_456_0	7	0.6498	1	0.6498	2	1	1	1
Leuconostoc~phage~P793	Caudovirales	Siphoviridae	Lmd1virus	455_0	Clustered	6	VC_455_0	6	0.5952	1	0.5952	1	1	1	1
Leuconostoc~phage~phiLN03	Caudovirales	Siphoviridae	Lmd1virus	455_0	Clustered	6	VC_455_0	6	0.5952	1	0.5952	1	1	1	1
Leuconostoc~phage~phiLN04	Caudovirales	Siphoviridae	Lmd1virus	455_0	Clustered	6	VC_455_0	6	0.5952	1	0.5952	1	1	1	1
Leuconostoc~phage~phiLN12	Caudovirales	Siphoviridae	Lmd1virus	455_0	Clustered	6	VC_455_0	6	0.5952	1	0.5952	1	1	1	1
Leuconostoc~phage~phiLN25	Caudovirales	Siphoviridae	Una4virus	456_0	Clustered	7	VC_456_0	7	0.6498	1	0.6498	2	1	1	1
Leuconostoc~phage~phiLN34	Caudovirales	Siphoviridae	Una4virus	456_0	Clustered	7	VC_456_0	7	0.6498	1	0.6498	2	1	1	1
Leuconostoc~phage~phiLN6B	Caudovirales	Siphoviridae	Lmd1virus	455_0	Clustered	6	VC_455_0	6	0.5952	1	0.5952	1	1	1	1
Leuconostoc~phage~phiLNTR2	Caudovirales	Siphoviridae	Unaquatrovirus	456_0	Clustered	7	VC_456_0	7	0.6498	1	0.6498	2	1	1	1
Leuconostoc~phage~phiLNTR3	Caudovirales	Siphoviridae	Una4virus	456_0	Clustered	7	VC_456_0	7	0.6498	1	0.6498	2	1	1	1
Li_JH_2014_NBT_MH0315_101102.NODE_138753_269	Unassigned	Unassigned	Unassigned	457_0	Clustered	2	VC_457_0	2	0.5897	0.5	0.2949	1	1	1	1
Li_JH_2014_NBT_V1.FI04_110822.NODE_465562_5335	Unassigned	Unassigned	Unassigned	384_0	Clustered	2	VC_384_0	2	0.0176	0.937687	0.0165	1	1	1	1
Li_JH_2014_NBT_V1.FI04_110822.NODE_466216_6511	Unassigned	Unassigned	Unassigned	369_0	Clustered	6	VC_369_0	6	0.1592	1	0.1592	1	1	1	1
Liberibacter~phage~SC1	Caudovirales	Podoviridae	Unassigned	227_0	Clustered	2	VC_227_0	2	0.6806	0.931679	0.6341	1	1	1	1
Liberibacter~phage~SC2	Caudovirales	Podoviridae	Unassigned	227_0	Clustered	2	VC_227_0	2	0.6806	0.931679	0.6341	1	1	1	1
Listeria~phage~A006	Caudovirales	Siphoviridae	Unassigned	178_0	Clustered	6	VC_178_0	6	0.7545	1	0.7545	1	1	1	0.6667
Listeria~phage~A118	Caudovirales	Siphoviridae	Unassigned	178_0	Clustered	6	VC_178_0	6	0.7545	1	0.7545	1	1	1	0.6667
Listeria~phage~A500	Caudovirales	Siphoviridae	Unassigned	178_0	Clustered	6	VC_178_0	6	0.7545	1	0.7545	1	1	1	0.6667
Listeria~phage~B025	Caudovirales	Siphoviridae	Psavirus	202_0	Clustered	4	VC_202_0	4	0.4204	0.999983	0.4204	1	1	1	1
Listeria~phage~LMSP-25	Caudovirales	Herelleviridae	Pecentumvirus	183_0	Clustered	14	VC_183_0	14	0.7009	1	0.7009	2	2	1	1
Listeria~phage~LMTA-148	Caudovirales	Herelleviridae	Pecentumvirus	183_0	Clustered	14	VC_183_0	14	0.7009	1	0.7009	2	2	1	1
Listeria~phage~LMTA-34	Caudovirales	Herelleviridae	Pecentumvirus	183_0	Clustered	14	VC_183_0	14	0.7009	1	0.7009	2	2	1	1
Listeria~phage~LMTA-57	Caudovirales	Herelleviridae	Pecentumvirus	183_0	Clustered	14	VC_183_0	14	0.7009	1	0.7009	2	2	1	1
Listeria~phage~LMTA-94	Caudovirales	Herelleviridae	Pecentumvirus	183_0	Clustered	14	VC_183_0	14	0.7009	1	0.7009	2	2	1	1
Listeria~phage~LP-026	Caudovirales	Siphoviridae	P70virus	345_0	Clustered	5	VC_345_0	5	0.8912	1	0.8912	1	1	1	1
Listeria~phage~LP-030-2	Caudovirales	Siphoviridae	Psavirus	202_0	Clustered	4	VC_202_0	4	0.4204	0.999983	0.4204	1	1	1	1
Listeria~phage~LP-030-3	Caudovirales	Siphoviridae	Unassigned	178_0	Clustered	6	VC_178_0	6	0.7545	1	0.7545	1	1	1	0.6667
Listeria~phage~LP-037	Caudovirales	Siphoviridae	P70virus	345_0	Clustered	5	VC_345_0	5	0.8912	1	0.8912	1	1	1	1
Listeria~phage~LP-048	Caudovirales	Herelleviridae	Pecentumvirus	183_0	Clustered	14	VC_183_0	14	0.7009	1	0.7009	2	2	1	1
Listeria~phage~LP-064	Caudovirales	Herelleviridae	Pecentumvirus	183_0	Clustered	14	VC_183_0	14	0.7009	1	0.7009	2	2	1	1
Listeria~phage~LP-083-2	Caudovirales	Herelleviridae	Pecentumvirus	183_0	Clustered	14	VC_183_0	14	0.7009	1	0.7009	2	2	1	1
Listeria~phage~LP-101	Caudovirales	Siphoviridae	Psavirus	202_0	Clustered	4	VC_202_0	4	0.4204	0.999983	0.4204	1	1	1	1
Listeria~phage~LP-110	Caudovirales	Siphoviridae	P70virus	345_0	Clustered	5	VC_345_0	5	0.8912	1	0.8912	1	1	1	1
Listeria~phage~LP-114	Caudovirales	Siphoviridae	P70virus	345_0	Clustered	5	VC_345_0	5	0.8912	1	0.8912	1	1	1	1
Listeria~phage~LP-124	Caudovirales	Herelleviridae	Pecentumvirus	183_0	Clustered	14	VC_183_0	14	0.7009	1	0.7009	2	2	1	1
Listeria~phage~LP-125	Caudovirales	Herelleviridae	Pecentumvirus	183_0	Clustered	14	VC_183_0	14	0.7009	1	0.7009	2	2	1	1
Listeria~phage~List-36	Caudovirales	Herelleviridae	Pecentumvirus	183_0	Clustered	14	VC_183_0	14	0.7009	1	0.7009	2	2	1	1
Listeria~phage~P35	Caudovirales	Siphoviridae	Unassigned	201_0	Clustered	3	VC_201_0	3	0.4531	0.99628	0.4514	1	1	1	1
Listeria~phage~P40	Caudovirales	Siphoviridae	Unassigned	201_0	Clustered	3	VC_201_0	3	0.4531	0.99628	0.4514	1	1	1	1
Listeria~phage~P70	Caudovirales	Siphoviridae	P70virus	345_0	Clustered	5	VC_345_0	5	0.8912	1	0.8912	1	1	1	1
Listeria~phage~PSA	Caudovirales	Siphoviridae	Psavirus	202_0	Clustered	4	VC_202_0	4	0.4204	0.999983	0.4204	1	1	1	1
Listeria~phage~vB_LmoM_AG20	Caudovirales	Herelleviridae	Pecentumvirus	183_0	Clustered	14	VC_183_0	14	0.7009	1	0.7009	2	2	1	1
Listeria~phage~vB_LmoS_188	Caudovirales	Siphoviridae	Unassigned	178_0	Clustered	6	VC_178_0	6	0.7545	1	0.7545	1	1	1	0.6667
Listeria~phage~vB_LmoS_293	Caudovirales	Siphoviridae	Unassigned	178_0	Clustered	6	VC_178_0	6	0.7545	1	0.7545	1	1	1	0.6667
Listeria~virus~A511	Caudovirales	Myoviridae	P100virus	183_0	Clustered	14	VC_183_0	14	0.7009	1	0.7009	2	2	1	1
Listeria~virus~P100	Caudovirales	Myoviridae	P100virus	183_0	Clustered	14	VC_183_0	14	0.7009	1	0.7009	2	2	1	1
Loktanella~phage~pCB2051-A	Caudovirales	Siphoviridae	Unassigned	19_0	Clustered	5	VC_19_0	5	0.0927	0.948135	0.0879	3	1	1	1
Mannheimia~phage~vB_MhS_1152AP2	Caudovirales	Siphoviridae	Unassigned	99_0	Clustered	3	VC_99_0	3	0.4355	0.998243	0.4348	1	1	1	0.6667
Mannheimia~phage~vB_MhS_535AP2	Caudovirales	Siphoviridae	Unassigned	99_0	Clustered	3	VC_99_0	3	0.4355	0.998243	0.4348	1	1	1	0.6667
Mannheimia~phage~vB_MhS_587AP2	Caudovirales	Siphoviridae	Unassigned	99_0	Clustered	3	VC_99_0	3	0.4355	0.998243	0.4348	1	1	1	0.6667
Mesorhizobium~phage~vB_MloP_Lo5R7ANS	Caudovirales	Autographiviridae	Pairvirus	309_0	Clustered	2	VC_309_0	2	0.0645	0.956052	0.0616	2	1	1	1
Methanobacterium~phage~psiM2	Caudovirales	Siphoviridae	Psimunavirus	458_0	Clustered	2	VC_458_0	2	1	1	1	2	1	1	1
Methanothermobacter~phage~psiM100	Caudovirales	Siphoviridae	Unassigned	458_0	Clustered	2	VC_458_0	2	1	1	1	2	1	1	1
Microbacterium~phage~Akoni	Caudovirales	Podoviridae	Unassigned	459_0	Clustered	4	VC_459_0	4	0.5734	0.99959	0.5732	1	1	1	1
Microbacterium~phage~Alex44	Caudovirales	Podoviridae	Unassigned	459_0	Clustered	4	VC_459_0	4	0.5734	0.99959	0.5732	1	1	1	1
Microbacterium~phage~Armstrong	Caudovirales	Siphoviridae	Armstrongvirus	138_0	Clustered	3	VC_138_0	3	0.4638	0.998267	0.463	3	1	1	1
Microbacterium~phage~Dismas	Caudovirales	Siphoviridae	Dismasvirus	138_0	Clustered	3	VC_138_0	3	0.4638	0.998267	0.463	3	1	1	1
Microbacterium~phage~Eden	Caudovirales	Siphoviridae	Edenvirus	138_0	Clustered	3	VC_138_0	3	0.4638	0.998267	0.463	3	1	1	1
Microbacterium~phage~Eleri	Caudovirales	Siphoviridae	Elerivirus	461_0	Clustered	8	VC_461_0	8	0.9975	0.99922	0.9967	6	1	1	1
Microbacterium~phage~Fireman	Caudovirales	Siphoviridae	Metamorphoovirus	159_0	Clustered	6	VC_159_0	6	0.813	1	0.813	2	1	1	1
Microbacterium~phage~Golden	Caudovirales	Siphoviridae	Kojivirus	461_0	Clustered	8	VC_461_0	8	0.9975	0.99922	0.9967	6	1	1	1
Microbacterium~phage~Hamlet	Caudovirales	Siphoviridae	Ilzatvirus	461_0	Clustered	8	VC_461_0	8	0.9975	0.99922	0.9967	6	1	1	1
Microbacterium~phage~Hyperion	Caudovirales	Siphoviridae	Squashvirus	158_0	Clustered	3	VC_158_0	3	0.8123	0.996918	0.8098	2	1	1	1
Microbacterium~phage~Ilzat	Caudovirales	Siphoviridae	Ilzatvirus	461_0	Clustered	8	VC_461_0	8	0.9975	0.99922	0.9967	6	1	1	1
Microbacterium~phage~KaiHaiDragon	Caudovirales	Siphoviridae	Quhwahvirus	159_0	Clustered	6	VC_159_0	6	0.813	1	0.813	2	1	1	1
Microbacterium~phage~Koji	Caudovirales	Siphoviridae	Kojivirus	461_0	Clustered	8	VC_461_0	8	0.9975	0.99922	0.9967	6	1	1	1
Microbacterium~phage~Metamorphoo	Caudovirales	Siphoviridae	Metamorphoovirus	159_0	Clustered	6	VC_159_0	6	0.813	1	0.813	2	1	1	1
Microbacterium~phage~Neferthena	Caudovirales	Siphoviridae	Neferthenavirus	461_0	Clustered	8	VC_461_0	8	0.9975	0.99922	0.9967	6	1	1	1
Microbacterium~phage~OneinaGillian	Caudovirales	Siphoviridae	Gillianvirus	158_0	Clustered	3	VC_158_0	3	0.8123	0.996918	0.8098	2	1	1	1
Microbacterium~phage~Paschalis	Caudovirales	Siphoviridae	Quhwahvirus	159_0	Clustered	6	VC_159_0	6	0.813	1	0.813	2	1	1	1
Microbacterium~phage~Phedro	Caudovirales	Podoviridae	Unassigned	459_0	Clustered	4	VC_459_0	4	0.5734	0.99959	0.5732	1	1	1	1
Microbacterium~phage~Pikmin	Caudovirales	Siphoviridae	Pikminvirus	461_0	Clustered	8	VC_461_0	8	0.9975	0.99922	0.9967	6	1	1	1
Microbacterium~phage~Quhwah	Caudovirales	Siphoviridae	Quhwahvirus	159_0	Clustered	6	VC_159_0	6	0.813	1	0.813	2	1	1	1
Microbacterium~phage~RobsFeet	Caudovirales	Siphoviridae	Metamorphoovirus	159_0	Clustered	6	VC_159_0	6	0.813	1	0.813	2	1	1	1
Microbacterium~phage~Schubert	Caudovirales	Siphoviridae	Schubertvirus	461_0	Clustered	8	VC_461_0	8	0.9975	0.99922	0.9967	6	1	1	1
Microbacterium~phage~Squash	Caudovirales	Siphoviridae	Squashvirus	158_0	Clustered	3	VC_158_0	3	0.8123	0.996918	0.8098	2	1	1	1
Microbacterium~phage~TinyTimothy	Caudovirales	Podoviridae	Unassigned	459_0	Clustered	4	VC_459_0	4	0.5734	0.99959	0.5732	1	1	1	1
Microbacterium~phage~Zeta1847	Caudovirales	Siphoviridae	Zetavirus	145_0	Clustered	4	VC_145_0	4	0.5972	0.999976	0.5972	4	1	1	1
Microbacterium~phage~vB_MoxS-ISF9	Caudovirales	Siphoviridae	Unassigned	144_0	Clustered	3	VC_144_0	3	0.6031	0.990548	0.5974	3	1	1	1
Microcystis~phage~MaMV-DC	Caudovirales	Myoviridae	Unassigned	462_0	Clustered	2	VC_462_0	2	1	1	1	1	1	1	1
Microcystis~virus~Ma-LMM01	Caudovirales	Myoviridae	Unassigned	462_0	Clustered	2	VC_462_0	2	1	1	1	1	1	1	1
Morganella~phage~MmP1	Caudovirales	Autographiviridae	Minipunavirus	276_0	Clustered	59	VC_276_0	59	0.7562	1	0.7562	11	2	1	1
Morganella~phage~vB_MmoP_MP2	Caudovirales	Autographiviridae	Minipunavirus	276_0	Clustered	59	VC_276_0	59	0.7562	1	0.7562	11	2	1	1
Mycobacterium~phage~20ES	Caudovirales	Siphoviridae	Fromanvirus	421_2	Clustered	28	VC_421_2	28	0.4499	1	0.4499	2	1	1	0.9153
Mycobacterium~phage~32HC	Caudovirales	Siphoviridae	Trigintaduovirus	291_0	Clustered	2	VC_291_0	2	0.077	0.954001	0.0735	2	1	1	1
Mycobacterium~phage~40AC	Caudovirales	Siphoviridae	Fromanvirus	421_1	Clustered	12	VC_421_1	12	0.2072	1	0.2072	2	1	1	1
Mycobacterium~phage~Abrogate	Caudovirales	Siphoviridae	Fromanvirus	463_0	Clustered	55	VC_463_0	55	0.9974	1	0.9974	2	1	1	1
Mycobacterium~phage~Adzzy	Caudovirales	Siphoviridae	Fromanvirus	421_2	Clustered	28	VC_421_2	28	0.4499	1	0.4499	2	1	1	0.9153
Mycobacterium~phage~Aeneas	Caudovirales	Siphoviridae	Fromanvirus	463_0	Clustered	55	VC_463_0	55	0.9974	1	0.9974	2	1	1	1
Mycobacterium~phage~Alice	Caudovirales	Myoviridae	Bxz1virus	465_0	Clustered	21	VC_465_0	21	0.9247	1	0.9247	2	1	1	1
Mycobacterium~phage~Alsfro	Caudovirales	Siphoviridae	Fromanvirus	463_0	Clustered	55	VC_463_0	55	0.9974	1	0.9974	2	1	1	1
Mycobacterium~phage~Alvin	Caudovirales	Siphoviridae	Fromanvirus	463_0	Clustered	55	VC_463_0	55	0.9974	1	0.9974	2	1	1	1
Mycobacterium~phage~Angel	Caudovirales	Siphoviridae	Liefievirus	425_0	Clustered	9	VC_425_0	9	0.5308	1	0.5308	1	1	1	1
Mycobacterium~phage~AnnaL29	Caudovirales	Siphoviridae	Fromanvirus	421_2	Clustered	28	VC_421_2	28	0.4499	1	0.4499	2	1	1	0.9153
Mycobacterium~phage~Anubis	Caudovirales	Siphoviridae	Fromanvirus	422_0	Clustered	11	VC_422_0	11	0.2593	1	0.2593	2	1	1	1
Mycobacterium~phage~Apizium	Caudovirales	Siphoviridae	Pg1virus	58_0	Clustered	21	VC_58_0	21	0.5541	1	0.5541	2	1	1	1
Mycobacterium~phage~ArcherNM	Caudovirales	Siphoviridae	Fromanvirus	421_2	Clustered	28	VC_421_2	28	0.4499	1	0.4499	2	1	1	0.9153
Mycobacterium~phage~ArcherS7	Caudovirales	Myoviridae	Bxz1virus	465_0	Clustered	21	VC_465_0	21	0.9247	1	0.9247	2	1	1	1
Mycobacterium~phage~Archie	Caudovirales	Siphoviridae	Bronvirus	409_0	Clustered	10	VC_409_0	10	0.8063	1	0.8063	1	1	1	0.9556
Mycobacterium~phage~Ariel	Caudovirales	Siphoviridae	Omegavirus	464_3	Clustered	3	VC_464_3	3	0.0884	0.997373	0.0881	1	1	1	1
Mycobacterium~phage~Artemis2UCLA	Caudovirales	Siphoviridae	Fromanvirus	421_1	Clustered	12	VC_421_1	12	0.2072	1	0.2072	2	1	1	1
Mycobacterium~phage~Astraea	Caudovirales	Myoviridae	Bxz1virus	465_0	Clustered	21	VC_465_0	21	0.9247	1	0.9247	2	1	1	1
Mycobacterium~phage~BTCU-1	Caudovirales	Siphoviridae	Fromanvirus	422_0	Clustered	11	VC_422_0	11	0.2593	1	0.2593	2	1	1	1
Mycobacterium~phage~Bactobuster	Caudovirales	Siphoviridae	Fromanvirus	421_2	Clustered	28	VC_421_2	28	0.4499	1	0.4499	2	1	1	0.9153
Mycobacterium~phage~Badfish	Caudovirales	Siphoviridae	Pg1virus	58_0	Clustered	21	VC_58_0	21	0.5541	1	0.5541	2	1	1	1
Mycobacterium~phage~Barnyard	Caudovirales	Siphoviridae	Barnyardvirus	419_0	Clustered	2	VC_419_0	2	0.1416	0.952272	0.1348	1	1	1	1
Mycobacterium~phage~BarrelRoll	Caudovirales	Siphoviridae	Timquatrovirus	411_2	Clustered	16	VC_411_2	16	0.5907	1	0.5907	2	1	1	0.8
Mycobacterium~phage~Barriga	Caudovirales	Siphoviridae	Fromanvirus	463_0	Clustered	55	VC_463_0	55	0.9974	1	0.9974	2	1	1	1
Mycobacterium~phage~BellusTerra	Caudovirales	Siphoviridae	Fromanvirus	422_1	Clustered	19	VC_422_1	19	0.3938	1	0.3938	2	1	1	0.8655
Mycobacterium~phage~Bernal13	Caudovirales	Siphoviridae	Bernal13virus	410_0	Clustered/Singleton	1	VC_410_0	1	0	1	0	1	1	1	1
Mycobacterium~phage~BigNuz	Caudovirales	Siphoviridae	Bignuzvirus	406_0	Clustered	8	VC_406_0	8	0.5095	1	0.5095	3	1	1	1
Mycobacterium~phage~Bipolar	Caudovirales	Siphoviridae	Cheoctovirus	403_4	Clustered	16	VC_403_4	16	0.1788	1	0.1788	2	1	1	0.75
Mycobacterium~phage~Blue7	Caudovirales	Siphoviridae	Fromanvirus	421_1	Clustered	12	VC_421_1	12	0.2072	1	0.2072	2	1	1	1
Mycobacterium~phage~Bobi	Caudovirales	Siphoviridae	Cheoctovirus	403_8	Clustered	4	VC_403_8	4	0.0316	0.999828	0.0316	2	1	1	0.8333
Mycobacterium~phage~Bongo	Caudovirales	Siphoviridae	Bongovirus	428_0	Clustered	3	VC_428_0	3	0.5315	0.997601	0.5302	2	1	1	1
Mycobacterium~phage~Breeniome	Caudovirales	Myoviridae	Bxz1virus	465_0	Clustered	21	VC_465_0	21	0.9247	1	0.9247	2	1	1	1
Mycobacterium~phage~Brocalys	Caudovirales	Siphoviridae	Cheoctovirus	403_5	Clustered	20	VC_403_5	20	0.2244	1	0.2244	2	1	1	0.7474
Mycobacterium~phage~Bruin	Caudovirales	Siphoviridae	Kostyavirus	466_0	Clustered	25	VC_466_0	25	0.9615	1	0.9615	2	1	1	1
Mycobacterium~phage~Brusacoram	Caudovirales	Siphoviridae	Fishburnevirus	406_0	Clustered	8	VC_406_0	8	0.5095	1	0.5095	3	1	1	1
Mycobacterium~phage~Butters	Caudovirales	Siphoviridae	Buttersvirus	139_0	Clustered	10	VC_139_0	10	0.5172	1	0.5172	3	1	1	1
Mycobacterium~phage~BuzzLyseyear	Caudovirales	Siphoviridae	Cheoctovirus	403_9	Clustered	4	VC_403_9	4	0.0397	0.999986	0.0397	2	1	1	1
Mycobacterium~phage~Bxz1	Caudovirales	Myoviridae	Bxz1virus	465_0	Clustered	21	VC_465_0	21	0.9247	1	0.9247	2	1	1	1
Mycobacterium~phage~CASbig	Caudovirales	Siphoviridae	Fromanvirus	463_0	Clustered	55	VC_463_0	55	0.9974	1	0.9974	2	1	1	1
Mycobacterium~phage~CRB1	Caudovirales	Siphoviridae	Fromanvirus	421_2	Clustered	28	VC_421_2	28	0.4499	1	0.4499	2	1	1	0.9153
Mycobacterium~phage~Cabrinians	Caudovirales	Siphoviridae	Cheoctovirus	403_5	Clustered	20	VC_403_5	20	0.2244	1	0.2244	2	1	1	0.7474
Mycobacterium~phage~Cali	Caudovirales	Myoviridae	Bxz1virus	465_0	Clustered	21	VC_465_0	21	0.9247	1	0.9247	2	1	1	1
Mycobacterium~phage~Cambiare	Caudovirales	Siphoviridae	Liefievirus	425_0	Clustered	9	VC_425_0	9	0.5308	1	0.5308	1	1	1	1
Mycobacterium~phage~CaptainTrips	Caudovirales	Siphoviridae	Cheoctovirus	403_4	Clustered	16	VC_403_4	16	0.1788	1	0.1788	2	1	1	0.75
Mycobacterium~phage~Carcharodon	Caudovirales	Siphoviridae	Charlievirus	139_0	Clustered	10	VC_139_0	10	0.5172	1	0.5172	3	1	1	1
Mycobacterium~phage~Catalina	Caudovirales	Siphoviridae	Fromanvirus	421_0	Clustered	4	VC_421_0	4	0.0749	0.999987	0.0749	2	1	1	1
Mycobacterium~phage~Catdawg	Caudovirales	Siphoviridae	Corndogvirus	467_0	Clustered	4	VC_467_0	4	0.542	0.999986	0.542	1	1	1	1
Mycobacterium~phage~Catera	Caudovirales	Myoviridae	Bxz1virus	465_0	Clustered	21	VC_465_0	21	0.9247	1	0.9247	2	1	1	1
Mycobacterium~phage~Cerasum	Caudovirales	Siphoviridae	Cheoctovirus	403_7	Clustered	2	VC_403_7	2	0.0212	0.956481	0.0203	1	1	1	1
Mycobacterium~phage~Chadwick	Caudovirales	Siphoviridae	Fromanvirus	423_1	Clustered	11	VC_423_1	11	0.3463	1	0.3463	2	1	1	1
Mycobacterium~phage~Charlie	Caudovirales	Siphoviridae	Charlievirus	139_0	Clustered	10	VC_139_0	10	0.5172	1	0.5172	3	1	1	1
Mycobacterium~phage~Cheetobro	Caudovirales	Siphoviridae	Timquatrovirus	411_0	Clustered	2	VC_411_0	2	0.065	0.954351	0.062	2	1	1	1
Mycobacterium~phage~Chy4	Caudovirales	Siphoviridae	Fromanvirus	421_2	Clustered	28	VC_421_2	28	0.4499	1	0.4499	2	1	1	0.9153
Mycobacterium~phage~Chy5	Caudovirales	Siphoviridae	Fromanvirus	421_2	Clustered	28	VC_421_2	28	0.4499	1	0.4499	2	1	1	0.9153
Mycobacterium~phage~CloudWang3	Caudovirales	Siphoviridae	Fromanvirus	421_1	Clustered	12	VC_421_1	12	0.2072	1	0.2072	2	1	1	1
Mycobacterium~phage~Colbert	Caudovirales	Siphoviridae	Pg1virus	58_0	Clustered	21	VC_58_0	21	0.5541	1	0.5541	2	1	1	1
Mycobacterium~phage~Conspiracy	Caudovirales	Siphoviridae	Fromanvirus	423_1	Clustered	11	VC_423_1	11	0.3463	1	0.3463	2	1	1	1
Mycobacterium~phage~Contagion	Caudovirales	Siphoviridae	Kostyavirus	466_0	Clustered	25	VC_466_0	25	0.9615	1	0.9615	2	1	1	1
Mycobacterium~phage~Cornie	Caudovirales	Siphoviridae	Cheoctovirus	403_2	Clustered/Singleton	1	VC_403_2	1	0	1	0	1	1	1	1
Mycobacterium~phage~Crossroads	Caudovirales	Siphoviridae	Bronvirus	409_0	Clustered	10	VC_409_0	10	0.8063	1	0.8063	1	1	1	0.9556
Mycobacterium~phage~Cuke	Caudovirales	Siphoviridae	Unassigned	297_1	Clustered	3	VC_297_1	3	0.1938	0.998219	0.1935	1	1	1	1
Mycobacterium~phage~DD5	Caudovirales	Siphoviridae	Fromanvirus	463_0	Clustered	55	VC_463_0	55	0.9974	1	0.9974	2	1	1	1
Mycobacterium~phage~Daenerys	Caudovirales	Siphoviridae	Cheoctovirus	403_5	Clustered	20	VC_403_5	20	0.2244	1	0.2244	2	1	1	0.7474
Mycobacterium~phage~Damien	Caudovirales	Siphoviridae	Unassigned	419_1	Clustered	5	VC_419_1	5	0.3675	1	0.3675	3	1	1	0.8
Mycobacterium~phage~Dandelion	Caudovirales	Myoviridae	Bxz1virus	465_0	Clustered	21	VC_465_0	21	0.9247	1	0.9247	2	1	1	1
Mycobacterium~phage~Dante	Caudovirales	Siphoviridae	Cheoctovirus	403_5	Clustered	20	VC_403_5	20	0.2244	1	0.2244	2	1	1	0.7474
Mycobacterium~phage~Donovan	Caudovirales	Siphoviridae	Fishburnevirus	406_0	Clustered	8	VC_406_0	8	0.5095	1	0.5095	3	1	1	1
Mycobacterium~phage~DrDrey	Caudovirales	Siphoviridae	Kostyavirus	466_0	Clustered	25	VC_466_0	25	0.9615	1	0.9615	2	1	1	1
Mycobacterium~phage~DrLupo	Caudovirales	Siphoviridae	Barnyardvirus	419_0	Clustered	2	VC_419_0	2	0.1416	0.952272	0.1348	1	1	1	1
Mycobacterium~phage~Dreamboat	Caudovirales	Siphoviridae	Fromanvirus	463_0	Clustered	55	VC_463_0	55	0.9974	1	0.9974	2	1	1	1
Mycobacterium~phage~Dumbo	Caudovirales	Siphoviridae	Kostyavirus	466_0	Clustered	25	VC_466_0	25	0.9615	1	0.9615	2	1	1	1
Mycobacterium~phage~Dusk	Caudovirales	Siphoviridae	Kostyavirus	466_0	Clustered	25	VC_466_0	25	0.9615	1	0.9615	2	1	1	1
Mycobacterium~phage~Dylan	Caudovirales	Siphoviridae	Corndogvirus	467_0	Clustered	4	VC_467_0	4	0.542	0.999986	0.542	1	1	1	1
Mycobacterium~phage~ET08	Caudovirales	Myoviridae	Bxz1virus	465_0	Clustered	21	VC_465_0	21	0.9247	1	0.9247	2	1	1	1
Mycobacterium~phage~EagleEye	Caudovirales	Siphoviridae	Fromanvirus	421_1	Clustered	12	VC_421_1	12	0.2072	1	0.2072	2	1	1	1
Mycobacterium~phage~Echild	Caudovirales	Siphoviridae	Fromanvirus	421_2	Clustered	28	VC_421_2	28	0.4499	1	0.4499	2	1	1	0.9153
Mycobacterium~phage~Edtherson	Caudovirales	Siphoviridae	Fromanvirus	463_0	Clustered	55	VC_463_0	55	0.9974	1	0.9974	2	1	1	1
Mycobacterium~phage~Enkosi	Caudovirales	Siphoviridae	Timquatrovirus	411_2	Clustered	16	VC_411_2	16	0.5907	1	0.5907	2	1	1	0.8
Mycobacterium~phage~Equemioh13	Caudovirales	Siphoviridae	Fromanvirus	421_2	Clustered	28	VC_421_2	28	0.4499	1	0.4499	2	1	1	0.9153
Mycobacterium~phage~Eremos	Caudovirales	Siphoviridae	Pg1virus	58_0	Clustered	21	VC_58_0	21	0.5541	1	0.5541	2	1	1	1
Mycobacterium~phage~Estave1	Caudovirales	Siphoviridae	Cheoctovirus	403_11	Clustered/Singleton	1	VC_403_11	1	0	1	0	1	1	1	1
Mycobacterium~phage~EvilGenius	Caudovirales	Siphoviridae	Fromanvirus	421_2	Clustered	28	VC_421_2	28	0.4499	1	0.4499	2	1	1	0.9153
Mycobacterium~phage~FF47	Caudovirales	Siphoviridae	Ff47virus	414_0	Clustered	2	VC_414_0	2	0.2627	0.954534	0.2507	1	1	1	1
Mycobacterium~phage~First	Caudovirales	Siphoviridae	Fromanvirus	421_2	Clustered	28	VC_421_2	28	0.4499	1	0.4499	2	1	1	0.9153
Mycobacterium~phage~Fishburne	Caudovirales	Siphoviridae	Fishburnevirus	406_0	Clustered	8	VC_406_0	8	0.5095	1	0.5095	3	1	1	1
Mycobacterium~phage~FlagStaff	Caudovirales	Siphoviridae	Liefievirus	425_0	Clustered	9	VC_425_0	9	0.5308	1	0.5308	1	1	1	1
Mycobacterium~phage~Florinda	Caudovirales	Siphoviridae	Cheoctovirus	403_0	Clustered	2	VC_403_0	2	0.0171	0.956579	0.0164	1	1	1	1
Mycobacterium~phage~Fowlmouth	Caudovirales	Siphoviridae	Unassigned	297_1	Clustered	3	VC_297_1	3	0.1938	0.998219	0.1935	1	1	1	1
Mycobacterium~phage~Fredward	Caudovirales	Siphoviridae	Fromanvirus	423_0	Clustered	4	VC_423_0	4	0.1216	0.999987	0.1216	2	1	1	1
Mycobacterium~phage~Gardann	Caudovirales	Siphoviridae	Bronvirus	409_0	Clustered	10	VC_409_0	10	0.8063	1	0.8063	1	1	1	0.9556
Mycobacterium~phage~Gengar	Caudovirales	Siphoviridae	Timquatrovirus	411_1	Clustered	5	VC_411_1	5	0.1991	1	0.1991	2	1	1	1
Mycobacterium~phage~Giles	Caudovirales	Siphoviridae	Gilesvirus	291_0	Clustered	2	VC_291_0	2	0.077	0.954001	0.0735	2	1	1	1
Mycobacterium~phage~Gizmo	Caudovirales	Myoviridae	Bxz1virus	465_0	Clustered	21	VC_465_0	21	0.9247	1	0.9247	2	1	1	1
Mycobacterium~phage~Goku	Caudovirales	Siphoviridae	Kostyavirus	466_0	Clustered	25	VC_466_0	25	0.9615	1	0.9615	2	1	1	1
Mycobacterium~phage~Gompeii16	Caudovirales	Siphoviridae	Fromanvirus	463_0	Clustered	55	VC_463_0	55	0.9974	1	0.9974	2	1	1	1
Mycobacterium~phage~Graduation	Caudovirales	Siphoviridae	Fromanvirus	463_0	Clustered	55	VC_463_0	55	0.9974	1	0.9974	2	1	1	1
Mycobacterium~phage~Gumball	Caudovirales	Siphoviridae	Plotvirus	420_0	Clustered	5	VC_420_0	5	0.3963	1	0.3963	3	1	1	1
Mycobacterium~phage~HINdeR	Caudovirales	Siphoviridae	Fromanvirus	422_1	Clustered	19	VC_422_1	19	0.3938	1	0.3938	2	1	1	0.8655
Mycobacterium~phage~Hades	Caudovirales	Siphoviridae	Cheoctovirus	403_4	Clustered	16	VC_403_4	16	0.1788	1	0.1788	2	1	1	0.75
Mycobacterium~phage~Hamulus	Caudovirales	Siphoviridae	Cheoctovirus	403_5	Clustered	20	VC_403_5	20	0.2244	1	0.2244	2	1	1	0.7474
Mycobacterium~phage~HanShotFirst	Caudovirales	Siphoviridae	Fromanvirus	463_0	Clustered	55	VC_463_0	55	0.9974	1	0.9974	2	1	1	1
Mycobacterium~phage~Hawkeye	Caudovirales	Siphoviridae	Hawkeyevirus	420_0	Clustered	5	VC_420_0	5	0.3963	1	0.3963	3	1	1	1
Mycobacterium~phage~HufflyPuff	Caudovirales	Siphoviridae	Kostyavirus	466_0	Clustered	25	VC_466_0	25	0.9615	1	0.9615	2	1	1	1
Mycobacterium~phage~HyRo	Caudovirales	Myoviridae	Bxz1virus	465_0	Clustered	21	VC_465_0	21	0.9247	1	0.9247	2	1	1	1
Mycobacterium~phage~Indlulamithi	Caudovirales	Siphoviridae	Unassigned	297_1	Clustered	3	VC_297_1	3	0.1938	0.998219	0.1935	1	1	1	1
Mycobacterium~phage~Inventum	Caudovirales	Siphoviridae	Cheoctovirus	403_5	Clustered	20	VC_403_5	20	0.2244	1	0.2244	2	1	1	0.7474
Mycobacterium~phage~Iracema64	Caudovirales	Siphoviridae	Fromanvirus	422_1	Clustered	19	VC_422_1	19	0.3938	1	0.3938	2	1	1	0.8655
Mycobacterium~phage~JacAttac	Caudovirales	Siphoviridae	Pg1virus	58_0	Clustered	21	VC_58_0	21	0.5541	1	0.5541	2	1	1	1
Mycobacterium~phage~Jebeks	Caudovirales	Siphoviridae	Fishburnevirus	406_0	Clustered	8	VC_406_0	8	0.5095	1	0.5095	3	1	1	1
Mycobacterium~phage~Job42	Caudovirales	Siphoviridae	Cheoctovirus	403_9	Clustered	4	VC_403_9	4	0.0397	0.999986	0.0397	2	1	1	1
Mycobacterium~phage~Jobu08	Caudovirales	Siphoviridae	Fromanvirus	422_0	Clustered	11	VC_422_0	11	0.2593	1	0.2593	2	1	1	1
Mycobacterium~phage~Jolie2	Caudovirales	Siphoviridae	Liefievirus	425_0	Clustered	9	VC_425_0	9	0.5308	1	0.5308	1	1	1	1
Mycobacterium~phage~Jovo	Caudovirales	Siphoviridae	Fromanvirus	423_1	Clustered	11	VC_423_1	11	0.3463	1	0.3463	2	1	1	1
Mycobacterium~phage~Kampy	Caudovirales	Siphoviridae	Fromanvirus	422_1	Clustered	19	VC_422_1	19	0.3938	1	0.3938	2	1	1	0.8655
Mycobacterium~phage~Keshu	Caudovirales	Siphoviridae	Timquatrovirus	411_2	Clustered	16	VC_411_2	16	0.5907	1	0.5907	2	1	1	0.8
Mycobacterium~phage~Kikipoo	Caudovirales	Siphoviridae	Pg1virus	58_0	Clustered	21	VC_58_0	21	0.5541	1	0.5541	2	1	1	1
Mycobacterium~phage~Kimberlium	Caudovirales	Siphoviridae	Cheoctovirus	403_8	Clustered	4	VC_403_8	4	0.0316	0.999828	0.0316	2	1	1	0.8333
Mycobacterium~phage~Konstantine	Caudovirales	Siphoviridae	Barnyardvirus	419_1	Clustered	5	VC_419_1	5	0.3675	1	0.3675	3	1	1	0.8
Mycobacterium~phage~Kratio	Caudovirales	Siphoviridae	Timquatrovirus	411_1	Clustered	5	VC_411_1	5	0.1991	1	0.1991	2	1	1	1
Mycobacterium~phage~LadyBird	Caudovirales	Siphoviridae	Fromanvirus	421_2	Clustered	28	VC_421_2	28	0.4499	1	0.4499	2	1	1	0.9153
Mycobacterium~phage~Lamina13	Caudovirales	Siphoviridae	Fromanvirus	463_0	Clustered	55	VC_463_0	55	0.9974	1	0.9974	2	1	1	1
Mycobacterium~phage~Larenn	Caudovirales	Siphoviridae	Fromanvirus	421_2	Clustered	28	VC_421_2	28	0.4499	1	0.4499	2	1	1	0.9153
Mycobacterium~phage~Leo	Caudovirales	Siphoviridae	Liefievirus	425_0	Clustered	9	VC_425_0	9	0.5308	1	0.5308	1	1	1	1
Mycobacterium~phage~Lilac	Caudovirales	Siphoviridae	Kostyavirus	466_0	Clustered	25	VC_466_0	25	0.9615	1	0.9615	2	1	1	1
Mycobacterium~phage~LinStu	Caudovirales	Myoviridae	Bxz1virus	465_0	Clustered	21	VC_465_0	21	0.9247	1	0.9247	2	1	1	1
Mycobacterium~phage~LittleCherry	Caudovirales	Siphoviridae	Fromanvirus	423_1	Clustered	11	VC_423_1	11	0.3463	1	0.3463	2	1	1	1
Mycobacterium~phage~Llama	Caudovirales	Siphoviridae	Cheoctovirus	403_6	Clustered	3	VC_403_6	3	0.0215	0.995393	0.0214	2	1	1	0.6667
Mycobacterium~phage~Llij	Caudovirales	Siphoviridae	Che8virus	403_5	Clustered	20	VC_403_5	20	0.2244	1	0.2244	2	1	1	0.7474
Mycobacterium~phage~Lolly9	Caudovirales	Siphoviridae	Bronvirus	409_0	Clustered	10	VC_409_0	10	0.8063	1	0.8063	1	1	1	0.9556
Mycobacterium~phage~Loser	Caudovirales	Siphoviridae	Fromanvirus	421_2	Clustered	28	VC_421_2	28	0.4499	1	0.4499	2	1	1	0.9153
Mycobacterium~phage~Luchador	Caudovirales	Siphoviridae	Fromanvirus	421_2	Clustered	28	VC_421_2	28	0.4499	1	0.4499	2	1	1	0.9153
Mycobacterium~phage~Lukilu	Caudovirales	Myoviridae	Bixzunavirus	465_0	Clustered	21	VC_465_0	21	0.9247	1	0.9247	2	1	1	1
Mycobacterium~phage~MOOREtheMARYer	Caudovirales	Siphoviridae	Liefievirus	425_0	Clustered	9	VC_425_0	9	0.5308	1	0.5308	1	1	1	1
Mycobacterium~phage~Makemake	Caudovirales	Siphoviridae	Fromanvirus	463_0	Clustered	55	VC_463_0	55	0.9974	1	0.9974	2	1	1	1
Mycobacterium~phage~Malithi	Caudovirales	Siphoviridae	Fishburnevirus	406_0	Clustered	8	VC_406_0	8	0.5095	1	0.5095	3	1	1	1
Mycobacterium~phage~Manad	Caudovirales	Siphoviridae	Pg1virus	58_0	Clustered	21	VC_58_0	21	0.5541	1	0.5541	2	1	1	1
Mycobacterium~phage~MarQuardt	Caudovirales	Siphoviridae	Fromanvirus	422_0	Clustered	11	VC_422_0	11	0.2593	1	0.2593	2	1	1	1
Mycobacterium~phage~Marvin	Caudovirales	Siphoviridae	Marvinvirus	404_0	Clustered	2	VC_404_0	2	0.8308	0.942718	0.7832	1	1	1	1
Mycobacterium~phage~MiaZeal	Caudovirales	Siphoviridae	Omegavirus	464_3	Clustered	3	VC_464_3	3	0.0884	0.997373	0.0881	1	1	1	1
Mycobacterium~phage~MichelleMyBell	Caudovirales	Siphoviridae	Buttersvirus	139_0	Clustered	10	VC_139_0	10	0.5172	1	0.5172	3	1	1	1
Mycobacterium~phage~Milly	Caudovirales	Siphoviridae	Timquatrovirus	411_2	Clustered	16	VC_411_2	16	0.5907	1	0.5907	2	1	1	0.8
Mycobacterium~phage~Mindy	Caudovirales	Siphoviridae	Kostyavirus	466_0	Clustered	25	VC_466_0	25	0.9615	1	0.9615	2	1	1	1
Mycobacterium~phage~Minerva	Caudovirales	Siphoviridae	Omegavirus	464_0	Clustered	4	VC_464_0	4	0.1388	0.999947	0.1388	1	1	1	1
Mycobacterium~phage~MoMoMixon	Caudovirales	Myoviridae	Bxz1virus	465_0	Clustered	21	VC_465_0	21	0.9247	1	0.9247	2	1	1	1
Mycobacterium~phage~MosMoris	Caudovirales	Siphoviridae	Marvinvirus	404_0	Clustered	2	VC_404_0	2	0.8308	0.942718	0.7832	1	1	1	1
Mycobacterium~phage~Muddy	Caudovirales	Siphoviridae	Ff47virus	414_0	Clustered	2	VC_414_0	2	0.2627	0.954534	0.2507	1	1	1	1
Mycobacterium~phage~Mufasa	Caudovirales	Siphoviridae	Timquatrovirus	411_2	Clustered	16	VC_411_2	16	0.5907	1	0.5907	2	1	1	0.8
Mycobacterium~phage~Mulciber	Caudovirales	Siphoviridae	Fromanvirus	421_2	Clustered	28	VC_421_2	28	0.4499	1	0.4499	2	1	1	0.9153
Mycobacterium~phage~Murphy	Caudovirales	Siphoviridae	Kostyavirus	466_0	Clustered	25	VC_466_0	25	0.9615	1	0.9615	2	1	1	1
Mycobacterium~phage~Murucutumbu	Caudovirales	Siphoviridae	Timquatrovirus	411_2	Clustered	16	VC_411_2	16	0.5907	1	0.5907	2	1	1	0.8
Mycobacterium~phage~Nala	Caudovirales	Siphoviridae	Kostyavirus	466_0	Clustered	25	VC_466_0	25	0.9615	1	0.9615	2	1	1	1
Mycobacterium~phage~Nappy	Caudovirales	Myoviridae	Bxz1virus	465_0	Clustered	21	VC_465_0	21	0.9247	1	0.9247	2	1	1	1
Mycobacterium~phage~NelitzaMV	Caudovirales	Siphoviridae	Kostyavirus	466_0	Clustered	25	VC_466_0	25	0.9615	1	0.9615	2	1	1	1
Mycobacterium~phage~Nerujay	Caudovirales	Siphoviridae	Fromanvirus	463_0	Clustered	55	VC_463_0	55	0.9974	1	0.9974	2	1	1	1
Mycobacterium~phage~Newman	Caudovirales	Siphoviridae	Pg1virus	58_0	Clustered	21	VC_58_0	21	0.5541	1	0.5541	2	1	1	1
Mycobacterium~phage~Nhonho	Caudovirales	Siphoviridae	Fromanvirus	463_0	Clustered	55	VC_463_0	55	0.9974	1	0.9974	2	1	1	1
Mycobacterium~phage~Nyxis	Caudovirales	Siphoviridae	Fromanvirus	422_1	Clustered	19	VC_422_1	19	0.3938	1	0.3938	2	1	1	0.8655
Mycobacterium~phage~OSmaximus	Caudovirales	Siphoviridae	Pg1virus	58_0	Clustered	21	VC_58_0	21	0.5541	1	0.5541	2	1	1	1
Mycobacterium~phage~Oaker	Caudovirales	Siphoviridae	Unassigned	419_1	Clustered	5	VC_419_1	5	0.3675	1	0.3675	3	1	1	0.8
Mycobacterium~phage~Obama12	Caudovirales	Siphoviridae	L5virus	422_1	Clustered	19	VC_422_1	19	0.3938	1	0.3938	2	1	1	0.8655
Mycobacterium~phage~OkiRoe	Caudovirales	Siphoviridae	Timquatrovirus	411_1	Clustered	5	VC_411_1	5	0.1991	1	0.1991	2	1	1	1
Mycobacterium~phage~Oline	Caudovirales	Siphoviridae	Pg1virus	58_0	Clustered	21	VC_58_0	21	0.5541	1	0.5541	2	1	1	1
Mycobacterium~phage~Omnicron	Caudovirales	Siphoviridae	Timquatrovirus	411_1	Clustered	5	VC_411_1	5	0.1991	1	0.1991	2	1	1	1
Mycobacterium~phage~Orion	Caudovirales	Siphoviridae	Pg1virus	58_0	Clustered	21	VC_58_0	21	0.5541	1	0.5541	2	1	1	1
Mycobacterium~phage~Ovechkin	Caudovirales	Siphoviridae	Cheoctovirus	403_4	Clustered	16	VC_403_4	16	0.1788	1	0.1788	2	1	1	0.75
Mycobacterium~phage~PBI1	Caudovirales	Siphoviridae	Pbi1virus	420_0	Clustered	5	VC_420_0	5	0.3963	1	0.3963	3	1	1	1
Mycobacterium~phage~PG1	Caudovirales	Siphoviridae	Pg1virus	58_0	Clustered	21	VC_58_0	21	0.5541	1	0.5541	2	1	1	1
Mycobacterium~phage~PLot	Caudovirales	Siphoviridae	Plotvirus	420_0	Clustered	5	VC_420_0	5	0.3963	1	0.3963	3	1	1	1
Mycobacterium~phage~Panchino	Caudovirales	Siphoviridae	Redivirus	139_0	Clustered	10	VC_139_0	10	0.5172	1	0.5172	3	1	1	1
Mycobacterium~phage~Papez	Caudovirales	Siphoviridae	Fromanvirus	463_0	Clustered	55	VC_463_0	55	0.9974	1	0.9974	2	1	1	1
Mycobacterium~phage~Papyrus	Caudovirales	Siphoviridae	Send513virus	297_0	Clustered	2	VC_297_0	2	0.1473	0.952265	0.1403	1	1	1	1
Mycobacterium~phage~Pari	Caudovirales	Siphoviridae	Fromanvirus	463_0	Clustered	55	VC_463_0	55	0.9974	1	0.9974	2	1	1	1
Mycobacterium~phage~Patience	Caudovirales	Siphoviridae	Patiencevirus	419_1	Clustered	5	VC_419_1	5	0.3675	1	0.3675	3	1	1	0.8
Mycobacterium~phage~PattyP	Caudovirales	Siphoviridae	Fromanvirus	463_0	Clustered	55	VC_463_0	55	0.9974	1	0.9974	2	1	1	1
Mycobacterium~phage~PegLeg	Caudovirales	Siphoviridae	Bongovirus	428_0	Clustered	3	VC_428_0	3	0.5315	0.997601	0.5302	2	1	1	1
Mycobacterium~phage~Pepe	Caudovirales	Siphoviridae	Fromanvirus	463_0	Clustered	55	VC_463_0	55	0.9974	1	0.9974	2	1	1	1
Mycobacterium~phage~Phantastic	Caudovirales	Siphoviridae	Fromanvirus	422_0	Clustered	11	VC_422_0	11	0.2593	1	0.2593	2	1	1	1
Mycobacterium~phage~PhatBacter	Caudovirales	Siphoviridae	Kostyavirus	466_0	Clustered	25	VC_466_0	25	0.9615	1	0.9615	2	1	1	1
Mycobacterium~phage~Phatniss	Caudovirales	Siphoviridae	Cheoctovirus	403_5	Clustered	20	VC_403_5	20	0.2244	1	0.2244	2	1	1	0.7474
Mycobacterium~phage~Phaux	Caudovirales	Siphoviridae	Kostyavirus	466_0	Clustered	25	VC_466_0	25	0.9615	1	0.9615	2	1	1	1
Mycobacterium~phage~Phayonce	Caudovirales	Siphoviridae	Phayoncevirus	406_0	Clustered	8	VC_406_0	8	0.5095	1	0.5095	3	1	1	1
Mycobacterium~phage~Phipps	Caudovirales	Siphoviridae	Pg1virus	58_0	Clustered	21	VC_58_0	21	0.5541	1	0.5541	2	1	1	1
Mycobacterium~phage~Phlei	Caudovirales	Siphoviridae	Fromanvirus	421_1	Clustered	12	VC_421_1	12	0.2072	1	0.2072	2	1	1	1
Mycobacterium~phage~Phrann	Caudovirales	Siphoviridae	Redivirus	139_0	Clustered	10	VC_139_0	10	0.5172	1	0.5172	3	1	1	1
Mycobacterium~phage~PhrostyMug	Caudovirales	Siphoviridae	Fromanvirus	463_0	Clustered	55	VC_463_0	55	0.9974	1	0.9974	2	1	1	1
Mycobacterium~phage~Phrux	Caudovirales	Siphoviridae	Kostyavirus	466_0	Clustered	25	VC_466_0	25	0.9615	1	0.9615	2	1	1	1
Mycobacterium~phage~Pinto	Caudovirales	Siphoviridae	Fromanvirus	463_0	Clustered	55	VC_463_0	55	0.9974	1	0.9974	2	1	1	1
Mycobacterium~phage~Pioneer	Caudovirales	Siphoviridae	Fromanvirus	421_0	Clustered	4	VC_421_0	4	0.0749	0.999987	0.0749	2	1	1	1
Mycobacterium~phage~Pipsqueaks	Caudovirales	Siphoviridae	Charlievirus	139_0	Clustered	10	VC_139_0	10	0.5172	1	0.5172	3	1	1	1
Mycobacterium~phage~Piro94	Caudovirales	Siphoviridae	Fromanvirus	421_2	Clustered	28	VC_421_2	28	0.4499	1	0.4499	2	1	1	0.9153
Mycobacterium~phage~Pleione	Caudovirales	Myoviridae	Bxz1virus	465_0	Clustered	21	VC_465_0	21	0.9247	1	0.9247	2	1	1	1
Mycobacterium~phage~PopTart	Caudovirales	Siphoviridae	Cheoctovirus	403_4	Clustered	16	VC_403_4	16	0.1788	1	0.1788	2	1	1	0.75
Mycobacterium~phage~Pops	Caudovirales	Siphoviridae	Pg1virus	58_0	Clustered	21	VC_58_0	21	0.5541	1	0.5541	2	1	1	1
Mycobacterium~phage~Predator	Caudovirales	Siphoviridae	Barnyardvirus	419_1	Clustered	5	VC_419_1	5	0.3675	1	0.3675	3	1	1	0.8
Mycobacterium~phage~Quico	Caudovirales	Siphoviridae	Cheoctovirus	403_0	Clustered	2	VC_403_0	2	0.0171	0.956579	0.0164	1	1	1	1
Mycobacterium~phage~Quink	Caudovirales	Siphoviridae	Kostyavirus	466_0	Clustered	25	VC_466_0	25	0.9615	1	0.9615	2	1	1	1
Mycobacterium~phage~RedRock	Caudovirales	Siphoviridae	L5virus	421_2	Clustered	28	VC_421_2	28	0.4499	1	0.4499	2	1	1	0.9153
Mycobacterium~phage~Redi	Caudovirales	Siphoviridae	Redivirus	139_0	Clustered	10	VC_139_0	10	0.5172	1	0.5172	3	1	1	1
Mycobacterium~phage~Redno2	Caudovirales	Siphoviridae	Omegavirus	464_1	Clustered/Singleton	1	VC_464_1	1	0	1	0	1	1	1	1
Mycobacterium~phage~Renaud18	Caudovirales	Siphoviridae	Cheoctovirus	403_1	Clustered/Singleton	1	VC_403_1	1	0	1	0	1	1	1	1
Mycobacterium~phage~Rey	Caudovirales	Siphoviridae	Reyvirus	428_0	Clustered	3	VC_428_0	3	0.5315	0.997601	0.5302	2	1	1	1
Mycobacterium~phage~RhynO	Caudovirales	Siphoviridae	Fromanvirus	422_1	Clustered	19	VC_422_1	19	0.3938	1	0.3938	2	1	1	0.8655
Mycobacterium~phage~RidgeCB	Caudovirales	Siphoviridae	L5virus	463_0	Clustered	55	VC_463_0	55	0.9974	1	0.9974	2	1	1	1
Mycobacterium~phage~Rizal	Caudovirales	Myoviridae	Bxz1virus	465_0	Clustered	21	VC_465_0	21	0.9247	1	0.9247	2	1	1	1
Mycobacterium~phage~Rockstar	Caudovirales	Siphoviridae	L5virus	422_0	Clustered	11	VC_422_0	11	0.2593	1	0.2593	2	1	1	1
Mycobacterium~phage~Rufus	Caudovirales	Siphoviridae	Fromanvirus	463_0	Clustered	55	VC_463_0	55	0.9974	1	0.9974	2	1	1	1
Mycobacterium~phage~SWU1	Caudovirales	Siphoviridae	L5virus	421_2	Clustered	28	VC_421_2	28	0.4499	1	0.4499	2	1	1	0.9153
Mycobacterium~phage~Saal	Caudovirales	Siphoviridae	Cheoctovirus	403_5	Clustered	20	VC_403_5	20	0.2244	1	0.2244	2	1	1	0.7474
Mycobacterium~phage~SarFire	Caudovirales	Siphoviridae	Fromanvirus	463_0	Clustered	55	VC_463_0	55	0.9974	1	0.9974	2	1	1	1
Mycobacterium~phage~ScottMcG	Caudovirales	Myoviridae	Bxz1virus	465_0	Clustered	21	VC_465_0	21	0.9247	1	0.9247	2	1	1	1
Mycobacterium~phage~Seabiscuit	Caudovirales	Siphoviridae	Fromanvirus	463_0	Clustered	55	VC_463_0	55	0.9974	1	0.9974	2	1	1	1
Mycobacterium~phage~Seagreen	Caudovirales	Siphoviridae	Cheoctovirus	403_8	Clustered	4	VC_403_8	4	0.0316	0.999828	0.0316	2	1	1	0.8333
Mycobacterium~phage~Sebata	Caudovirales	Myoviridae	Bxz1virus	465_0	Clustered	21	VC_465_0	21	0.9247	1	0.9247	2	1	1	1
Mycobacterium~phage~Send513	Caudovirales	Siphoviridae	Send513virus	297_0	Clustered	2	VC_297_0	2	0.1473	0.952265	0.1403	1	1	1	1
Mycobacterium~phage~Serenity	Caudovirales	Siphoviridae	Fromanvirus	421_2	Clustered	28	VC_421_2	28	0.4499	1	0.4499	2	1	1	0.9153
Mycobacterium~phage~Severus	Caudovirales	Siphoviridae	Fromanvirus	422_1	Clustered	19	VC_422_1	19	0.3938	1	0.3938	2	1	1	0.8655
Mycobacterium~phage~Shauna1	Caudovirales	Siphoviridae	Che8virus	403_4	Clustered	16	VC_403_4	16	0.1788	1	0.1788	2	1	1	0.75
Mycobacterium~phage~ShedlockHolmes	Caudovirales	Siphoviridae	Timquatrovirus	411_2	Clustered	16	VC_411_2	16	0.5907	1	0.5907	2	1	1	0.8
Mycobacterium~phage~Sheen	Caudovirales	Siphoviridae	Fromanvirus	422_1	Clustered	19	VC_422_1	19	0.3938	1	0.3938	2	1	1	0.8655
Mycobacterium~phage~ShiLan	Caudovirales	Siphoviridae	Che8virus	403_5	Clustered	20	VC_403_5	20	0.2244	1	0.2244	2	1	1	0.7474
Mycobacterium~phage~ShiVal	Caudovirales	Siphoviridae	Pg1virus	58_0	Clustered	21	VC_58_0	21	0.5541	1	0.5541	2	1	1	1
Mycobacterium~phage~Shipwreck	Caudovirales	Siphoviridae	Fishburnevirus	406_0	Clustered	8	VC_406_0	8	0.5095	1	0.5095	3	1	1	1
Mycobacterium~phage~SiSi	Caudovirales	Siphoviridae	Cheoctovirus	403_5	Clustered	20	VC_403_5	20	0.2244	1	0.2244	2	1	1	0.7474
Mycobacterium~phage~SirDuracell	Caudovirales	Siphoviridae	Cjw1virus	466_0	Clustered	25	VC_466_0	25	0.9615	1	0.9615	2	1	1	1
Mycobacterium~phage~SkiPole	Caudovirales	Siphoviridae	L5virus	463_0	Clustered	55	VC_463_0	55	0.9974	1	0.9974	2	1	1	1
Mycobacterium~phage~SkinnyPete	Caudovirales	Siphoviridae	Redivirus	139_0	Clustered	10	VC_139_0	10	0.5172	1	0.5172	3	1	1	1
Mycobacterium~phage~Smeadley	Caudovirales	Siphoviridae	Fromanvirus	423_0	Clustered	4	VC_423_0	4	0.1216	0.999987	0.1216	2	1	1	1
Mycobacterium~phage~Sneeze	Caudovirales	Siphoviridae	Liefievirus	425_0	Clustered	9	VC_425_0	9	0.5308	1	0.5308	1	1	1	1
Mycobacterium~phage~Snenia	Caudovirales	Siphoviridae	Bronvirus	409_0	Clustered	10	VC_409_0	10	0.8063	1	0.8063	1	1	1	0.9556
Mycobacterium~phage~Solon	Caudovirales	Siphoviridae	L5virus	463_0	Clustered	55	VC_463_0	55	0.9974	1	0.9974	2	1	1	1
Mycobacterium~phage~Soto	Caudovirales	Siphoviridae	Pg1virus	58_0	Clustered	21	VC_58_0	21	0.5541	1	0.5541	2	1	1	1
Mycobacterium~phage~Sparkdehlily	Caudovirales	Siphoviridae	Cheoctovirus	403_6	Clustered	3	VC_403_6	3	0.0215	0.995393	0.0214	2	1	1	0.6667
Mycobacterium~phage~Sparky	Caudovirales	Siphoviridae	Unassigned	410_1	Clustered/Singleton	1	VC_410_1	1	0	1	0	1	1	1	1
Mycobacterium~phage~Spartacus	Caudovirales	Siphoviridae	Che8virus	403_4	Clustered	16	VC_403_4	16	0.1788	1	0.1788	2	1	1	0.75
Mycobacterium~phage~Spud	Caudovirales	Myoviridae	Bxz1virus	465_0	Clustered	21	VC_465_0	21	0.9247	1	0.9247	2	1	1	1
Mycobacterium~phage~Squirty	Caudovirales	Siphoviridae	Cheoctovirus	403_3	Clustered/Singleton	1	VC_403_3	1	0	1	0	1	1	1	1
Mycobacterium~phage~Suffolk	Caudovirales	Siphoviridae	Pg1virus	58_0	Clustered	21	VC_58_0	21	0.5541	1	0.5541	2	1	1	1
Mycobacterium~phage~SweetiePie	Caudovirales	Siphoviridae	Fromanvirus	421_2	Clustered	28	VC_421_2	28	0.4499	1	0.4499	2	1	1	0.9153
Mycobacterium~phage~Swirley	Caudovirales	Siphoviridae	Fromanvirus	423_1	Clustered	11	VC_423_1	11	0.3463	1	0.3463	2	1	1	1
Mycobacterium~phage~Swish	Caudovirales	Siphoviridae	Pg1virus	58_0	Clustered	21	VC_58_0	21	0.5541	1	0.5541	2	1	1	1
Mycobacterium~phage~Switzer	Caudovirales	Siphoviridae	L5virus	463_0	Clustered	55	VC_463_0	55	0.9974	1	0.9974	2	1	1	1
Mycobacterium~phage~TM4	Caudovirales	Siphoviridae	Tm4virus	411_2	Clustered	16	VC_411_2	16	0.5907	1	0.5907	2	1	1	0.8
Mycobacterium~phage~Taj	Caudovirales	Siphoviridae	Che8virus	403_4	Clustered	16	VC_403_4	16	0.1788	1	0.1788	2	1	1	0.75
Mycobacterium~phage~Tasp14	Caudovirales	Siphoviridae	Fromanvirus	463_0	Clustered	55	VC_463_0	55	0.9974	1	0.9974	2	1	1	1
Mycobacterium~phage~Theia	Caudovirales	Siphoviridae	Fromanvirus	423_1	Clustered	11	VC_423_1	11	0.3463	1	0.3463	2	1	1	1
Mycobacterium~phage~TheloniousMonk	Caudovirales	Siphoviridae	Fromanvirus	463_0	Clustered	55	VC_463_0	55	0.9974	1	0.9974	2	1	1	1
Mycobacterium~phage~Thibault	Caudovirales	Siphoviridae	Omegavirus	464_2	Clustered/Singleton	1	VC_464_2	1	0	1	0	1	1	1	1
Mycobacterium~phage~Tiffany	Caudovirales	Siphoviridae	Fromanvirus	422_0	Clustered	11	VC_422_0	11	0.2593	1	0.2593	2	1	1	1
Mycobacterium~phage~Tiger	Caudovirales	Siphoviridae	L5virus	423_1	Clustered	11	VC_423_1	11	0.3463	1	0.3463	2	1	1	1
Mycobacterium~phage~Timshel	Caudovirales	Siphoviridae	L5virus	422_1	Clustered	19	VC_422_1	19	0.3938	1	0.3938	2	1	1	0.8655
Mycobacterium~phage~Tonenili	Caudovirales	Myoviridae	Bixzunavirus	465_0	Clustered	21	VC_465_0	21	0.9247	1	0.9247	2	1	1	1
Mycobacterium~phage~Toto	Caudovirales	Siphoviridae	Cjw1virus	466_0	Clustered	25	VC_466_0	25	0.9615	1	0.9615	2	1	1	1
Mycobacterium~phage~Trike	Caudovirales	Siphoviridae	Fromanvirus	422_1	Clustered	19	VC_422_1	19	0.3938	1	0.3938	2	1	1	0.8655
Mycobacterium~phage~Trixie	Caudovirales	Siphoviridae	L5virus	421_2	Clustered	28	VC_421_2	28	0.4499	1	0.4499	2	1	1	0.9153
Mycobacterium~phage~Troll4	Caudovirales	Siphoviridae	Plotvirus	420_0	Clustered	5	VC_420_0	5	0.3963	1	0.3963	3	1	1	1
Mycobacterium~phage~Trouble	Caudovirales	Siphoviridae	Fromanvirus	463_0	Clustered	55	VC_463_0	55	0.9974	1	0.9974	2	1	1	1
Mycobacterium~phage~Turbido	Caudovirales	Siphoviridae	L5virus	421_2	Clustered	28	VC_421_2	28	0.4499	1	0.4499	2	1	1	0.9153
Mycobacterium~phage~Turj99	Caudovirales	Siphoviridae	Fromanvirus	463_0	Clustered	55	VC_463_0	55	0.9974	1	0.9974	2	1	1	1
Mycobacterium~phage~Tweety	Caudovirales	Siphoviridae	Che8virus	403_5	Clustered	20	VC_403_5	20	0.2244	1	0.2244	2	1	1	0.7474
Mycobacterium~phage~Twister	Caudovirales	Siphoviridae	L5virus	422_1	Clustered	19	VC_422_1	19	0.3938	1	0.3938	2	1	1	0.8655
Mycobacterium~phage~U2	Caudovirales	Siphoviridae	L5virus	463_0	Clustered	55	VC_463_0	55	0.9974	1	0.9974	2	1	1	1
Mycobacterium~phage~UncleHowie	Caudovirales	Siphoviridae	Pg1virus	58_0	Clustered	21	VC_58_0	21	0.5541	1	0.5541	2	1	1	1
Mycobacterium~phage~UnionJack	Caudovirales	Siphoviridae	Fromanvirus	423_1	Clustered	11	VC_423_1	11	0.3463	1	0.3463	2	1	1	1
Mycobacterium~phage~Validus	Caudovirales	Siphoviridae	Timquatrovirus	411_2	Clustered	16	VC_411_2	16	0.5907	1	0.5907	2	1	1	0.8
Mycobacterium~phage~Velveteen	Caudovirales	Siphoviridae	Cheoctovirus	403_7	Clustered	2	VC_403_7	2	0.0212	0.956481	0.0203	1	1	1	1
Mycobacterium~phage~Violet	Caudovirales	Siphoviridae	L5virus	463_0	Clustered	55	VC_463_0	55	0.9974	1	0.9974	2	1	1	1
Mycobacterium~phage~Vista	Caudovirales	Siphoviridae	Pg1virus	58_0	Clustered	21	VC_58_0	21	0.5541	1	0.5541	2	1	1	1
Mycobacterium~phage~VohminGhazi	Caudovirales	Siphoviridae	Fromanvirus	421_1	Clustered	12	VC_421_1	12	0.2072	1	0.2072	2	1	1	1
Mycobacterium~phage~Vortex	Caudovirales	Siphoviridae	Pegunavirus	58_0	Clustered	21	VC_58_0	21	0.5541	1	0.5541	2	1	1	1
Mycobacterium~phage~WIVsmall	Caudovirales	Siphoviridae	Cheoctovirus	403_10	Clustered/Singleton	1	VC_403_10	1	0	1	0	1	1	1	1
Mycobacterium~phage~Wanda	Caudovirales	Siphoviridae	Omegavirus	464_0	Clustered	4	VC_464_0	4	0.1388	0.999947	0.1388	1	1	1	1
Mycobacterium~phage~Wee	Caudovirales	Siphoviridae	Che8virus	403_4	Clustered	16	VC_403_4	16	0.1788	1	0.1788	2	1	1	0.75
Mycobacterium~phage~Wheeler	Caudovirales	Siphoviridae	Fromanvirus	463_0	Clustered	55	VC_463_0	55	0.9974	1	0.9974	2	1	1	1
Mycobacterium~phage~Whirlwind	Caudovirales	Siphoviridae	Bronvirus	409_0	Clustered	10	VC_409_0	10	0.8063	1	0.8063	1	1	1	0.9556
Mycobacterium~phage~Wile	Caudovirales	Siphoviridae	Fromanvirus	422_1	Clustered	19	VC_422_1	19	0.3938	1	0.3938	2	1	1	0.8655
Mycobacterium~phage~XFactor	Caudovirales	Siphoviridae	Cheoctovirus	403_4	Clustered	16	VC_403_4	16	0.1788	1	0.1788	2	1	1	0.75
Mycobacterium~phage~Xeno	Caudovirales	Siphoviridae	Charlievirus	139_0	Clustered	10	VC_139_0	10	0.5172	1	0.5172	3	1	1	1
Mycobacterium~phage~Zaka	Caudovirales	Siphoviridae	Fromanvirus	421_1	Clustered	12	VC_421_1	12	0.2072	1	0.2072	2	1	1	1
Mycobacterium~phage~ZoeJ	Caudovirales	Siphoviridae	Timquatrovirus	411_2	Clustered	16	VC_411_2	16	0.5907	1	0.5907	2	1	1	0.8
Mycobacterium~virus~244	Caudovirales	Siphoviridae	Cjw1virus	466_0	Clustered	25	VC_466_0	25	0.9615	1	0.9615	2	1	1	1
Mycobacterium~virus~Alma	Caudovirales	Siphoviridae	L5virus	421_0	Clustered	4	VC_421_0	4	0.0749	0.999987	0.0749	2	1	1	1
Mycobacterium~virus~Anaya	Caudovirales	Siphoviridae	Tm4virus	411_2	Clustered	16	VC_411_2	16	0.5907	1	0.5907	2	1	1	0.8
Mycobacterium~virus~Angelica	Caudovirales	Siphoviridae	Tm4virus	411_2	Clustered	16	VC_411_2	16	0.5907	1	0.5907	2	1	1	0.8
Mycobacterium~virus~Ardmore	Caudovirales	Siphoviridae	Che8virus	403_4	Clustered	16	VC_403_4	16	0.1788	1	0.1788	2	1	1	0.75
Mycobacterium~virus~Arturo	Caudovirales	Siphoviridae	L5virus	422_1	Clustered	19	VC_422_1	19	0.3938	1	0.3938	2	1	1	0.8655
Mycobacterium~virus~Astro	Caudovirales	Siphoviridae	L5virus	423_0	Clustered	4	VC_423_0	4	0.1216	0.999987	0.1216	2	1	1	1
Mycobacterium~virus~BBPiebs31	Caudovirales	Siphoviridae	L5virus	463_0	Clustered	55	VC_463_0	55	0.9974	1	0.9974	2	1	1	1
Mycobacterium~virus~Backyardigan	Caudovirales	Siphoviridae	L5virus	422_1	Clustered	19	VC_422_1	19	0.3938	1	0.3938	2	1	1	0.8655
Mycobacterium~virus~Baka	Caudovirales	Siphoviridae	Omegavirus	464_0	Clustered	4	VC_464_0	4	0.1388	0.999947	0.1388	1	1	1	1
Mycobacterium~virus~Bask21	Caudovirales	Siphoviridae	Cjw1virus	466_0	Clustered	25	VC_466_0	25	0.9615	1	0.9615	2	1	1	1
Mycobacterium~virus~Benedict	Caudovirales	Siphoviridae	L5virus	423_1	Clustered	11	VC_423_1	11	0.3463	1	0.3463	2	1	1	1
Mycobacterium~virus~Bethlehem	Caudovirales	Siphoviridae	L5virus	463_0	Clustered	55	VC_463_0	55	0.9974	1	0.9974	2	1	1	1
Mycobacterium~virus~Billknuckles	Caudovirales	Siphoviridae	L5virus	463_0	Clustered	55	VC_463_0	55	0.9974	1	0.9974	2	1	1	1
Mycobacterium~virus~Boomer	Caudovirales	Siphoviridae	Che8virus	403_5	Clustered	20	VC_403_5	20	0.2244	1	0.2244	2	1	1	0.7474
Mycobacterium~virus~Bron	Caudovirales	Siphoviridae	Bronvirus	409_0	Clustered	10	VC_409_0	10	0.8063	1	0.8063	1	1	1	0.9556
Mycobacterium~virus~Bruns	Caudovirales	Siphoviridae	L5virus	463_0	Clustered	55	VC_463_0	55	0.9974	1	0.9974	2	1	1	1
Mycobacterium~virus~Bxb1	Caudovirales	Siphoviridae	L5virus	463_0	Clustered	55	VC_463_0	55	0.9974	1	0.9974	2	1	1	1
Mycobacterium~virus~Bxz2	Caudovirales	Siphoviridae	L5virus	422_0	Clustered	11	VC_422_0	11	0.2593	1	0.2593	2	1	1	1
Mycobacterium~virus~CJW1	Caudovirales	Siphoviridae	Cjw1virus	466_0	Clustered	25	VC_466_0	25	0.9615	1	0.9615	2	1	1	1
Mycobacterium~virus~Che12	Caudovirales	Siphoviridae	L5virus	421_2	Clustered	28	VC_421_2	28	0.4499	1	0.4499	2	1	1	0.9153
Mycobacterium~virus~Che8	Caudovirales	Siphoviridae	Che8virus	403_6	Clustered	3	VC_403_6	3	0.0215	0.995393	0.0214	2	1	1	0.6667
Mycobacterium~virus~Corndog	Caudovirales	Siphoviridae	Corndogvirus	467_0	Clustered	4	VC_467_0	4	0.542	0.999986	0.542	1	1	1	1
Mycobacterium~virus~Courthouse	Caudovirales	Siphoviridae	Omegavirus	464_3	Clustered	3	VC_464_3	3	0.0884	0.997373	0.0881	1	1	1	1
Mycobacterium~virus~Crimd	Caudovirales	Siphoviridae	Tm4virus	411_2	Clustered	16	VC_411_2	16	0.5907	1	0.5907	2	1	1	0.8
Mycobacterium~virus~Cuco	Caudovirales	Siphoviridae	L5virus	423_1	Clustered	11	VC_423_1	11	0.3463	1	0.3463	2	1	1	1
Mycobacterium~virus~D29	Caudovirales	Siphoviridae	L5virus	421_2	Clustered	28	VC_421_2	28	0.4499	1	0.4499	2	1	1	0.9153
Mycobacterium~virus~Deadp	Caudovirales	Siphoviridae	Che8virus	403_4	Clustered	16	VC_403_4	16	0.1788	1	0.1788	2	1	1	0.75
Mycobacterium~virus~Dlane	Caudovirales	Siphoviridae	Che8virus	403_4	Clustered	16	VC_403_4	16	0.1788	1	0.1788	2	1	1	0.75
Mycobacterium~virus~Doom	Caudovirales	Siphoviridae	L5virus	463_0	Clustered	55	VC_463_0	55	0.9974	1	0.9974	2	1	1	1
Mycobacterium~virus~Dorothy	Caudovirales	Siphoviridae	Che8virus	403_5	Clustered	20	VC_403_5	20	0.2244	1	0.2244	2	1	1	0.7474
Mycobacterium~virus~Dotproduct	Caudovirales	Siphoviridae	Che8virus	403_5	Clustered	20	VC_403_5	20	0.2244	1	0.2244	2	1	1	0.7474
Mycobacterium~virus~Drago	Caudovirales	Siphoviridae	Che8virus	403_5	Clustered	20	VC_403_5	20	0.2244	1	0.2244	2	1	1	0.7474
Mycobacterium~virus~Ericb	Caudovirales	Siphoviridae	L5virus	421_1	Clustered	12	VC_421_1	12	0.2072	1	0.2072	2	1	1	1
Mycobacterium~virus~Euphoria	Caudovirales	Siphoviridae	L5virus	463_0	Clustered	55	VC_463_0	55	0.9974	1	0.9974	2	1	1	1
Mycobacterium~virus~Eureka	Caudovirales	Siphoviridae	Cjw1virus	466_0	Clustered	25	VC_466_0	25	0.9615	1	0.9615	2	1	1	1
Mycobacterium~virus~Faith1	Caudovirales	Siphoviridae	Bronvirus	409_0	Clustered	10	VC_409_0	10	0.8063	1	0.8063	1	1	1	0.9556
Mycobacterium~virus~Fionnbarth	Caudovirales	Siphoviridae	Tm4virus	411_0	Clustered	2	VC_411_0	2	0.065	0.954351	0.062	2	1	1	1
Mycobacterium~virus~Firecracker	Caudovirales	Siphoviridae	Corndogvirus	467_0	Clustered	4	VC_467_0	4	0.542	0.999986	0.542	1	1	1	1
Mycobacterium~virus~Fruitloop	Caudovirales	Siphoviridae	Che8virus	403_4	Clustered	16	VC_403_4	16	0.1788	1	0.1788	2	1	1	0.75
Mycobacterium~virus~George	Caudovirales	Siphoviridae	L5virus	423_1	Clustered	11	VC_423_1	11	0.3463	1	0.3463	2	1	1	1
Mycobacterium~virus~Gladiator	Caudovirales	Siphoviridae	L5virus	421_1	Clustered	12	VC_421_1	12	0.2072	1	0.2072	2	1	1	1
Mycobacterium~virus~Goose	Caudovirales	Siphoviridae	L5virus	422_1	Clustered	19	VC_422_1	19	0.3938	1	0.3938	2	1	1	0.8655
Mycobacterium~virus~Gumbie	Caudovirales	Siphoviridae	Che8virus	403_5	Clustered	20	VC_403_5	20	0.2244	1	0.2244	2	1	1	0.7474
Mycobacterium~virus~Halo	Caudovirales	Siphoviridae	Liefievirus	425_0	Clustered	9	VC_425_0	9	0.5308	1	0.5308	1	1	1	1
Mycobacterium~virus~Hammer	Caudovirales	Siphoviridae	L5virus	421_1	Clustered	12	VC_421_1	12	0.2072	1	0.2072	2	1	1	1
Mycobacterium~virus~Heldan	Caudovirales	Siphoviridae	L5virus	422_0	Clustered	11	VC_422_0	11	0.2593	1	0.2593	2	1	1	1
Mycobacterium~virus~Ibhubesi	Caudovirales	Siphoviridae	Che8virus	403_5	Clustered	20	VC_403_5	20	0.2244	1	0.2244	2	1	1	0.7474
Mycobacterium~virus~JC27	Caudovirales	Siphoviridae	L5virus	463_0	Clustered	55	VC_463_0	55	0.9974	1	0.9974	2	1	1	1
Mycobacterium~virus~JHC117	Caudovirales	Siphoviridae	L5virus	422_0	Clustered	11	VC_422_0	11	0.2593	1	0.2593	2	1	1	1
Mycobacterium~virus~Jasper	Caudovirales	Siphoviridae	L5virus	463_0	Clustered	55	VC_463_0	55	0.9974	1	0.9974	2	1	1	1
Mycobacterium~virus~Jaws	Caudovirales	Siphoviridae	Tm4virus	411_2	Clustered	16	VC_411_2	16	0.5907	1	0.5907	2	1	1	0.8
Mycobacterium~virus~Jeffabunny	Caudovirales	Siphoviridae	L5virus	421_1	Clustered	12	VC_421_1	12	0.2072	1	0.2072	2	1	1	1
Mycobacterium~virus~Joedirt	Caudovirales	Siphoviridae	Bronvirus	409_0	Clustered	10	VC_409_0	10	0.8063	1	0.8063	1	1	1	0.9556
Mycobacterium~virus~KBG	Caudovirales	Siphoviridae	L5virus	463_0	Clustered	55	VC_463_0	55	0.9974	1	0.9974	2	1	1	1
Mycobacterium~virus~Kostya	Caudovirales	Siphoviridae	Cjw1virus	466_0	Clustered	25	VC_466_0	25	0.9615	1	0.9615	2	1	1	1
Mycobacterium~virus~Kssjeb	Caudovirales	Siphoviridae	L5virus	463_0	Clustered	55	VC_463_0	55	0.9974	1	0.9974	2	1	1	1
Mycobacterium~virus~Kugel	Caudovirales	Siphoviridae	L5virus	463_0	Clustered	55	VC_463_0	55	0.9974	1	0.9974	2	1	1	1
Mycobacterium~virus~L5	Caudovirales	Siphoviridae	L5virus	421_2	Clustered	28	VC_421_2	28	0.4499	1	0.4499	2	1	1	0.9153
Mycobacterium~virus~LHTSCC	Caudovirales	Siphoviridae	L5virus	422_1	Clustered	19	VC_422_1	19	0.3938	1	0.3938	2	1	1	0.8655
Mycobacterium~virus~Larva	Caudovirales	Siphoviridae	Tm4virus	411_1	Clustered	5	VC_411_1	5	0.1991	1	0.1991	2	1	1	1
Mycobacterium~virus~Lesedi	Caudovirales	Siphoviridae	L5virus	463_0	Clustered	55	VC_463_0	55	0.9974	1	0.9974	2	1	1	1
Mycobacterium~virus~Liefie	Caudovirales	Siphoviridae	Liefievirus	425_0	Clustered	9	VC_425_0	9	0.5308	1	0.5308	1	1	1	1
Mycobacterium~virus~Littlee	Caudovirales	Siphoviridae	Omegavirus	464_4	Clustered	2	VC_464_4	2	0.0406	0.940048	0.0382	1	1	1	1
Mycobacterium~virus~Macncheese	Caudovirales	Siphoviridae	Tm4virus	411_2	Clustered	16	VC_411_2	16	0.5907	1	0.5907	2	1	1	0.8
Mycobacterium~virus~Marcell	Caudovirales	Siphoviridae	L5virus	463_0	Clustered	55	VC_463_0	55	0.9974	1	0.9974	2	1	1	1
Mycobacterium~virus~Microwolf	Caudovirales	Siphoviridae	L5virus	422_0	Clustered	11	VC_422_0	11	0.2593	1	0.2593	2	1	1	1
Mycobacterium~virus~Mozy	Caudovirales	Siphoviridae	Che8virus	403_8	Clustered	4	VC_403_8	4	0.0316	0.999828	0.0316	2	1	1	0.8333
Mycobacterium~virus~Mrgordo	Caudovirales	Siphoviridae	L5virus	463_0	Clustered	55	VC_463_0	55	0.9974	1	0.9974	2	1	1	1
Mycobacterium~virus~Museum	Caudovirales	Siphoviridae	L5virus	463_0	Clustered	55	VC_463_0	55	0.9974	1	0.9974	2	1	1	1
Mycobacterium~virus~Mutaforma13	Caudovirales	Siphoviridae	Che8virus	403_4	Clustered	16	VC_403_4	16	0.1788	1	0.1788	2	1	1	0.75
Mycobacterium~virus~Nepal	Caudovirales	Siphoviridae	L5virus	463_0	Clustered	55	VC_463_0	55	0.9974	1	0.9974	2	1	1	1
Mycobacterium~virus~Omega	Caudovirales	Siphoviridae	Omegavirus	464_4	Clustered	2	VC_464_4	2	0.0406	0.940048	0.0382	1	1	1	1
Mycobacterium~virus~Optimus	Caudovirales	Siphoviridae	Omegavirus	464_0	Clustered	4	VC_464_0	4	0.1388	0.999947	0.1388	1	1	1	1
Mycobacterium~virus~PMC	Caudovirales	Siphoviridae	Che8virus	403_5	Clustered	20	VC_403_5	20	0.2244	1	0.2244	2	1	1	0.7474
Mycobacterium~virus~Pacc40	Caudovirales	Siphoviridae	Che8virus	403_5	Clustered	20	VC_403_5	20	0.2244	1	0.2244	2	1	1	0.7474
Mycobacterium~virus~Packman	Caudovirales	Siphoviridae	L5virus	421_0	Clustered	4	VC_421_0	4	0.0749	0.999987	0.0749	2	1	1	1
Mycobacterium~virus~Peaches	Caudovirales	Siphoviridae	L5virus	422_1	Clustered	19	VC_422_1	19	0.3938	1	0.3938	2	1	1	0.8655
Mycobacterium~virus~Perseus	Caudovirales	Siphoviridae	L5virus	463_0	Clustered	55	VC_463_0	55	0.9974	1	0.9974	2	1	1	1
Mycobacterium~virus~Pixie	Caudovirales	Siphoviridae	Tm4virus	411_2	Clustered	16	VC_411_2	16	0.5907	1	0.5907	2	1	1	0.8
Mycobacterium~virus~Porky	Caudovirales	Siphoviridae	Cjw1virus	466_0	Clustered	25	VC_466_0	25	0.9615	1	0.9615	2	1	1	1
Mycobacterium~virus~Pukovnik	Caudovirales	Siphoviridae	L5virus	421_2	Clustered	28	VC_421_2	28	0.4499	1	0.4499	2	1	1	0.9153
Mycobacterium~virus~Pumpkin	Caudovirales	Siphoviridae	Cjw1virus	466_0	Clustered	25	VC_466_0	25	0.9615	1	0.9615	2	1	1	1
Mycobacterium~virus~Ramsey	Caudovirales	Siphoviridae	Che8virus	403_9	Clustered	4	VC_403_9	4	0.0397	0.999986	0.0397	2	1	1	1
Mycobacterium~virus~Rebeuca	Caudovirales	Siphoviridae	L5virus	422_1	Clustered	19	VC_422_1	19	0.3938	1	0.3938	2	1	1	0.8655
Mycobacterium~virus~Rockyhorror	Caudovirales	Siphoviridae	Che8virus	403_9	Clustered	4	VC_403_9	4	0.0397	0.999986	0.0397	2	1	1	1
Mycobacterium~virus~Rumpelstiltskin	Caudovirales	Siphoviridae	Bronvirus	409_0	Clustered	10	VC_409_0	10	0.8063	1	0.8063	1	1	1	0.9556
Mycobacterium~virus~SG4	Caudovirales	Siphoviridae	Che8virus	403_4	Clustered	16	VC_403_4	16	0.1788	1	0.1788	2	1	1	0.75
Mycobacterium~virus~Saintus	Caudovirales	Siphoviridae	L5virus	423_0	Clustered	4	VC_423_0	4	0.1216	0.999987	0.1216	2	1	1	1
Mycobacterium~virus~lockley	Caudovirales	Siphoviridae	L5virus	463_0	Clustered	55	VC_463_0	55	0.9974	1	0.9974	2	1	1	1
Mycoplasma~phage~MAV1	Unassigned	Unassigned	Unassigned	469_0	Clustered	2	VC_469_0	2	1	1	1	1	1	1	1
Mycoplasma~phage~phiMFV1	Unassigned	Unassigned	Unassigned	469_0	Clustered	2	VC_469_0	2	1	1	1	1	1	1	1
Myoviridae~sp.	Caudovirales	Myoviridae	Unassigned	94_0	Clustered	11	VC_94_0	11	0.8494	1	0.8494	5	2	1	1
Nodularia~phage~vB_NspS-kac65v151	Caudovirales	Siphoviridae	Unassigned	470_0	Clustered	2	VC_470_0	2	1	1	1	1	1	1	1
Nodularia~phage~vB_NspS-kac68v161	Caudovirales	Siphoviridae	Unassigned	470_0	Clustered	2	VC_470_0	2	1	1	1	1	1	1	1
Nonlabens~phage~P12024L	Caudovirales	Siphoviridae	P12024virus	471_0	Clustered	2	VC_471_0	2	1	1	1	1	1	1	1
Nonlabens~phage~P12024S	Caudovirales	Siphoviridae	P12024virus	471_0	Clustered	2	VC_471_0	2	1	1	1	1	1	1	1
Oenococcus~phage~phi9805	Caudovirales	Siphoviridae	Unassigned	121_0	Clustered	3	VC_121_0	3	0.5741	0.996612	0.5721	1	1	1	1
Oenococcus~phage~phiS11	Caudovirales	Siphoviridae	Unassigned	121_0	Clustered	3	VC_121_0	3	0.5741	0.996612	0.5721	1	1	1	1
Oenococcus~phage~phiS13	Caudovirales	Siphoviridae	Unassigned	121_0	Clustered	3	VC_121_0	3	0.5741	0.996612	0.5721	1	1	1	1
PVD|GVD|Ma_2019_SRR341589_NODE_262_length_45054_cov_5.487189	Unassigned	Unassigned	Unassigned	324_0	Clustered	61	VC_324_0	61	0.6933	1	0.6933	1	1	1	1
PVD|GVD|Ma_2019_SRR341670_NODE_370_length_49477_cov_15.778236	Unassigned	Unassigned	Unassigned	358_0	Clustered	25	VC_358_0	25	0.7076	1	0.7076	1	1	1	0.8267
PVD|GVD|Ma_2019_SRR413585_NODE_726_length_23621_cov_2.314394	Unassigned	Unassigned	Unassigned	323_0	Clustered	23	VC_323_0	23	0.4894	1	0.4894	1	1	1	1
PVD|GVD|Minot_Diet_SRR5088938_NODE_163_length_12154_cov_91.098288	Unassigned	Unassigned	Unassigned	395_0	Clustered	3	VC_395_0	3	0.6795	0.986558	0.6704	1	1	1	1
PVD|GVD|Norman_106_NODE_37_length_2504_cov_7.888934	Unassigned	Unassigned	Unassigned	440_0	Clustered	7	VC_440_0	7	0.8665	1	0.8665	1	1	1	1
PVD|GVD|Rampelli_HCO_12_NODE_74_length_42185_cov_4.777736	Unassigned	Unassigned	Unassigned	358_0	Clustered	25	VC_358_0	25	0.7076	1	0.7076	1	1	1	0.8267
PVD|GVD|Shkoporov_2018_SRR6128094_NODE_5_length_99079_cov_529.888320	Unassigned	Unassigned	Unassigned	389_0	Clustered	3	VC_389_0	3	0.5566	0.997527	0.5552	1	1	1	1
PVD|GVD|Zuo_2017_SRR5677806_NODE_21_length_40158_cov_338.408149	Unassigned	Unassigned	Unassigned	326_0	Clustered	22	VC_326_0	22	0.7319	1	0.7319	1	1	1	1
PVD|HGV_Individual|metaspades_NG-13376_922T9_lib202089_5478_NODE_17_length_36845_cov_38.724	Unassigned	Unassigned	Unassigned	324_0	Clustered	61	VC_324_0	61	0.6933	1	0.6933	1	1	1	1
PVD|gluvab|Seq_154001_Human_smacovirus_1_isolate_France/12/2008/3454_complete_genome	Unassigned	Unassigned	Unassigned	440_0	Clustered	7	VC_440_0	7	0.8665	1	0.8665	1	1	1	1
Paenibacillus~phage~BN12	Caudovirales	Siphoviridae	Sitaravirus	179_0	Clustered	20	VC_179_0	20	0.8509	1	0.8509	1	1	1	1
Paenibacillus~phage~Diva	Caudovirales	Siphoviridae	Sitaravirus	179_0	Clustered	20	VC_179_0	20	0.8509	1	0.8509	1	1	1	1
Paenibacillus~phage~Eltigre	Caudovirales	Siphoviridae	Sitaravirus	179_0	Clustered	20	VC_179_0	20	0.8509	1	0.8509	1	1	1	1
Paenibacillus~phage~Fern	Caudovirales	Siphoviridae	Sitaravirus	179_0	Clustered	20	VC_179_0	20	0.8509	1	0.8509	1	1	1	1
Paenibacillus~phage~HB10c2	Caudovirales	Siphoviridae	Sitaravirus	179_0	Clustered	20	VC_179_0	20	0.8509	1	0.8509	1	1	1	1
Paenibacillus~phage~Jacopo	Caudovirales	Siphoviridae	Sitaravirus	179_0	Clustered	20	VC_179_0	20	0.8509	1	0.8509	1	1	1	1
Paenibacillus~phage~Kawika	Caudovirales	Siphoviridae	Sitaravirus	179_0	Clustered	20	VC_179_0	20	0.8509	1	0.8509	1	1	1	1
Paenibacillus~phage~Leyra	Caudovirales	Siphoviridae	Sitaravirus	179_0	Clustered	20	VC_179_0	20	0.8509	1	0.8509	1	1	1	1
Paenibacillus~phage~Likha	Caudovirales	Siphoviridae	Sitaravirus	179_0	Clustered	20	VC_179_0	20	0.8509	1	0.8509	1	1	1	1
Paenibacillus~phage~Lucielle	Caudovirales	Siphoviridae	Sitaravirus	179_0	Clustered	20	VC_179_0	20	0.8509	1	0.8509	1	1	1	1
Paenibacillus~phage~PBL1c	Caudovirales	Siphoviridae	Sitaravirus	179_0	Clustered	20	VC_179_0	20	0.8509	1	0.8509	1	1	1	1
Paenibacillus~phage~Pagassa	Caudovirales	Siphoviridae	Sitaravirus	179_0	Clustered	20	VC_179_0	20	0.8509	1	0.8509	1	1	1	1
Paenibacillus~phage~Rani	Caudovirales	Siphoviridae	Sitaravirus	179_0	Clustered	20	VC_179_0	20	0.8509	1	0.8509	1	1	1	1
Paenibacillus~phage~Shelly	Caudovirales	Siphoviridae	Sitaravirus	179_0	Clustered	20	VC_179_0	20	0.8509	1	0.8509	1	1	1	1
Paenibacillus~phage~Sitara	Caudovirales	Siphoviridae	Sitaravirus	179_0	Clustered	20	VC_179_0	20	0.8509	1	0.8509	1	1	1	1
Paenibacillus~phage~Tadhana	Caudovirales	Siphoviridae	Sitaravirus	179_0	Clustered	20	VC_179_0	20	0.8509	1	0.8509	1	1	1	1
Paenibacillus~phage~Tripp	Caudovirales	Siphoviridae	Trippvirus	206_0	Clustered	2	VC_206_0	2	0.6397	0.855578	0.5473	2	1	1	1
Paenibacillus~phage~Willow	Caudovirales	Siphoviridae	Sitaravirus	179_0	Clustered	20	VC_179_0	20	0.8509	1	0.8509	1	1	1	1
Paenibacillus~phage~Xenia	Caudovirales	Siphoviridae	Sitaravirus	179_0	Clustered	20	VC_179_0	20	0.8509	1	0.8509	1	1	1	1
Paenibacillus~phage~Yerffej	Caudovirales	Siphoviridae	Sitaravirus	179_0	Clustered	20	VC_179_0	20	0.8509	1	0.8509	1	1	1	1
[truncated: 2,782 more rows]
