# Supplementary material for: Metagenomic analysis reveals unexplored diversity of archaeal virome in the human gut
Source: Nat Commun. 2022 Dec 29;13:7978. doi: 10.1038/s41467-022-35735-y (PMC9800368; doi:10.1038/s41467-022-35735-y)
Supplement: Supplementary file 12 — Data 8 [file 41467_2022_35735_MOESM12_ESM.xlsx]

## Sheet: Supplementary Table10
Genome	Order	Family	Genus	VC	VC Status	Size	VC Subcluster	VC Subcluster Size	Quality	Adj P-value	Topology Confidence Score	Genera in VC	Families in VC	Orders in VC	Genus Confidence Score
Achromobacter~phage~83-24	Caudovirales	Siphoviridae	Jwxvirus	0_0	Clustered	2	VC_0_0	2	0.1744	0.952505	0.1662	1	1	1	1
Achromobacter~phage~JWAlpha	Caudovirales	Podoviridae	Jwalphavirus	6_0	Clustered	22	VC_6_0	22	0.501	1	0.501	7	2	2	0.7792
Achromobacter~phage~JWF	Caudovirales	Siphoviridae	Unassigned	17_0	Clustered	2	VC_17_0	2	0.2475	0.931679	0.2306	2	1	1	1
Achromobacter~phage~JWX	Caudovirales	Siphoviridae	Jwxvirus	0_0	Clustered	2	VC_0_0	2	0.1744	0.952505	0.1662	1	1	1	1
Achromobacter~phage~phiAxp-1	Caudovirales	Siphoviridae	Unassigned	1_0	Clustered	12	VC_1_0	12	0.6666	1	0.6666	5	1	1	1
Achromobacter~phage~phiAxp-2	Caudovirales	Siphoviridae	Unassigned	23_0	Clustered	6	VC_23_0	6	0.1077	0.96498	0.1039	3	2	2	1
Achromobacter~phage~phiAxp-3	Caudovirales	Podoviridae	Jwalphavirus	6_0	Clustered	22	VC_6_0	22	0.501	1	0.501	7	2	2	0.7792
Acidianus~bottle-shaped~virus	Unassigned	Ampullaviridae	Ampullavirus	26_0	Clustered	3	VC_26_0	3	1	1	1	1	1	1	1
Acidianus~bottle-shaped~virus~2	Unassigned	Ampullaviridae	Ampullavirus	26_0	Clustered	3	VC_26_0	3	1	1	1	1	1	1	1
Acidianus~bottle-shaped~virus~3	Unassigned	Ampullaviridae	Ampullavirus	26_0	Clustered	3	VC_26_0	3	1	1	1	1	1	1	1
Acidianus~filamentous~virus~2	Ligamenvirales	Lipothrixviridae	Deltalipothrixvirus	29_0	Clustered	2	VC_29_0	2	0.3599	0.929484	0.3345	1	1	1	1
Acidianus~filamentous~virus~3	Ligamenvirales	Lipothrixviridae	Betalipothrixvirus	27_0	Clustered	6	VC_27_0	6	0.9208	1	0.9208	1	1	1	1
Acidianus~filamentous~virus~6	Ligamenvirales	Lipothrixviridae	Betalipothrixvirus	27_0	Clustered	6	VC_27_0	6	0.9208	1	0.9208	1	1	1	1
Acidianus~filamentous~virus~7	Ligamenvirales	Lipothrixviridae	Betalipothrixvirus	27_0	Clustered	6	VC_27_0	6	0.9208	1	0.9208	1	1	1	1
Acidianus~filamentous~virus~8	Ligamenvirales	Lipothrixviridae	Betalipothrixvirus	27_0	Clustered	6	VC_27_0	6	0.9208	1	0.9208	1	1	1	1
Acidianus~filamentous~virus~9	Ligamenvirales	Lipothrixviridae	Betalipothrixvirus	27_0	Clustered	6	VC_27_0	6	0.9208	1	0.9208	1	1	1	1
Acidianus~spindle-shaped~virus~1	Unassigned	Fuselloviridae	Betafusellovirus	31_0	Clustered	9	VC_31_0	9	0.911	0.999998	0.911	2	1	1	1
Acinetobacter~phage~AB1	Caudovirales	Myoviridae	Ap22virus	42_0	Clustered	9	VC_42_0	9	0.8491	1	0.8491	2	1	1	1
Acinetobacter~phage~AB3	Caudovirales	Podoviridae	Fri1virus	44_0	Clustered	23	VC_44_0	23	1	1	1	4	2	1	1
Acinetobacter~phage~AM101	Caudovirales	Myoviridae	Unassigned	45_0	Clustered	10	VC_45_0	10	0.1944	1	0.1944	1	1	1	0.9333
Acinetobacter~phage~AP22	Caudovirales	Myoviridae	Ap22virus	42_0	Clustered	9	VC_42_0	9	0.8491	1	0.8491	2	1	1	1
Acinetobacter~phage~AbKT21phiIII	Caudovirales	Autographiviridae	Friunavirus	44_0	Clustered	23	VC_44_0	23	1	1	1	4	2	1	1
Acinetobacter~phage~AbP2	Caudovirales	Myoviridae	Obolenskvirus	42_0	Clustered	9	VC_42_0	9	0.8491	1	0.8491	2	1	1	1
Acinetobacter~phage~AbTZA1	Caudovirales	Myoviridae	Unassigned	45_0	Clustered	10	VC_45_0	10	0.1944	1	0.1944	1	1	1	0.9333
Acinetobacter~phage~Abp1	Caudovirales	Podoviridae	Fri1virus	44_0	Clustered	23	VC_44_0	23	1	1	1	4	2	1	1
Acinetobacter~phage~Ac42	Caudovirales	Myoviridae	Unassigned	45_4	Clustered/Singleton	1	VC_45_4	1	0	1	0	1	1	1	1
Acinetobacter~phage~Acj61	Caudovirales	Myoviridae	Unassigned	45_1	Clustered/Singleton	1	VC_45_1	1	0	1	0	1	1	1	1
Acinetobacter~phage~Acj9	Caudovirales	Myoviridae	Unassigned	45_2	Clustered/Singleton	1	VC_45_2	1	0	1	0	1	1	1	1
Acinetobacter~phage~Fri1	Caudovirales	Podoviridae	Fri1virus	44_0	Clustered	23	VC_44_0	23	1	1	1	4	2	1	1
Acinetobacter~phage~IME-AB2	Caudovirales	Myoviridae	Ap22virus	42_0	Clustered	9	VC_42_0	9	0.8491	1	0.8491	2	1	1	1
Acinetobacter~phage~IME200	Caudovirales	Podoviridae	Fri1virus	44_0	Clustered	23	VC_44_0	23	1	1	1	4	2	1	1
Acinetobacter~phage~IMEAB3	Caudovirales	Siphoviridae	Lokivirus	1_0	Clustered	12	VC_1_0	12	0.6666	1	0.6666	5	1	1	1
Acinetobacter~phage~KARL-1	Caudovirales	Myoviridae	Unassigned	45_0	Clustered	10	VC_45_0	10	0.1944	1	0.1944	1	1	1	0.9333
Acinetobacter~phage~LZ35	Caudovirales	Myoviridae	Obolenskvirus	42_0	Clustered	9	VC_42_0	9	0.8491	1	0.8491	2	1	1	1
Acinetobacter~phage~Loki	Caudovirales	Siphoviridae	Lokivirus	1_0	Clustered	12	VC_1_0	12	0.6666	1	0.6666	5	1	1	1
Acinetobacter~phage~Petty	Caudovirales	Autographiviridae	Pettyvirus	44_0	Clustered	23	VC_44_0	23	1	1	1	4	2	1	1
Acinetobacter~phage~SH-Ab~15519	Caudovirales	Autographiviridae	Friunavirus	44_0	Clustered	23	VC_44_0	23	1	1	1	4	2	1	1
Acinetobacter~phage~WCHABP1	Caudovirales	Myoviridae	Obolenskvirus	42_0	Clustered	9	VC_42_0	9	0.8491	1	0.8491	2	1	1	1
Acinetobacter~phage~WCHABP12	Caudovirales	Myoviridae	Obolenskvirus	42_0	Clustered	9	VC_42_0	9	0.8491	1	0.8491	2	1	1	1
Acinetobacter~phage~WCHABP5	Caudovirales	Autographiviridae	Friunavirus	44_0	Clustered	23	VC_44_0	23	1	1	1	4	2	1	1
Acinetobacter~phage~YMC-13-01-C62	Caudovirales	Myoviridae	Ap22virus	42_0	Clustered	9	VC_42_0	9	0.8491	1	0.8491	2	1	1	1
Acinetobacter~phage~YMC/09/02/B1251	Caudovirales	Siphoviridae	Vieuvirus	52_0	Clustered	3	VC_52_0	3	0.8887	0.992942	0.8824	1	1	1	1
Acinetobacter~phage~YMC11/11/R3177	Caudovirales	Siphoviridae	Vieuvirus	52_0	Clustered	3	VC_52_0	3	0.8887	0.992942	0.8824	1	1	1	1
Acinetobacter~phage~YMC11/12/R2315	Caudovirales	Myoviridae	Obolenskvirus	42_0	Clustered	9	VC_42_0	9	0.8491	1	0.8491	2	1	1	1
Acinetobacter~phage~ZZ1	Caudovirales	Myoviridae	Unassigned	45_3	Clustered/Singleton	1	VC_45_3	1	0	1	0	1	1	1	1
Acinetobacter~phage~phiAB1	Caudovirales	Podoviridae	Fri1virus	44_0	Clustered	23	VC_44_0	23	1	1	1	4	2	1	1
Acinetobacter~phage~phiAB6	Caudovirales	Autographiviridae	Friunavirus	44_0	Clustered	23	VC_44_0	23	1	1	1	4	2	1	1
Acinetobacter~phage~vB_AbaM_Acibel004	Caudovirales	Myoviridae	Saclayvirus	53_1	Clustered/Singleton	1	VC_53_1	1	0	1	0	1	1	1	1
Acinetobacter~phage~vB_AbaM_B09_Aci01-1	Caudovirales	Myoviridae	Saclayvirus	53_0	Clustered	4	VC_53_0	4	0.5595	0.99998	0.5595	1	1	1	1
Acinetobacter~phage~vB_AbaM_B09_Aci02-2	Caudovirales	Myoviridae	Saclayvirus	53_0	Clustered	4	VC_53_0	4	0.5595	0.99998	0.5595	1	1	1	1
Acinetobacter~phage~vB_AbaM_B09_Aci05	Caudovirales	Myoviridae	Saclayvirus	53_0	Clustered	4	VC_53_0	4	0.5595	0.99998	0.5595	1	1	1	1
Acinetobacter~phage~vB_AbaM_PhT2	Caudovirales	Myoviridae	Unassigned	45_0	Clustered	10	VC_45_0	10	0.1944	1	0.1944	1	1	1	0.9333
Acinetobacter~phage~vB_AbaM_phiAbaA1	Caudovirales	Myoviridae	Saclayvirus	53_0	Clustered	4	VC_53_0	4	0.5595	0.99998	0.5595	1	1	1	1
Acinetobacter~phage~vB_AbaP_46-62_Aci07	Caudovirales	Autographiviridae	Friunavirus	44_0	Clustered	23	VC_44_0	23	1	1	1	4	2	1	1
Acinetobacter~phage~vB_AbaP_AS11	Caudovirales	Autographiviridae	Friunavirus	44_0	Clustered	23	VC_44_0	23	1	1	1	4	2	1	1
Acinetobacter~phage~vB_AbaP_AS12	Caudovirales	Autographiviridae	Friunavirus	44_0	Clustered	23	VC_44_0	23	1	1	1	4	2	1	1
Acinetobacter~phage~vB_AbaP_Acibel007	Caudovirales	Autographiviridae	Daemvirus	44_0	Clustered	23	VC_44_0	23	1	1	1	4	2	1	1
Acinetobacter~phage~vB_AbaP_Apostate	Caudovirales	Myoviridae	Unassigned	45_0	Clustered	10	VC_45_0	10	0.1944	1	0.1944	1	1	1	0.9333
Acinetobacter~phage~vB_AbaP_B09_Aci08	Caudovirales	Autographiviridae	Friunavirus	44_0	Clustered	23	VC_44_0	23	1	1	1	4	2	1	1
Acinetobacter~phage~vB_AbaP_B1	Caudovirales	Autographiviridae	Friunavirus	44_0	Clustered	23	VC_44_0	23	1	1	1	4	2	1	1
Acinetobacter~phage~vB_AbaP_B3	Caudovirales	Autographiviridae	Friunavirus	44_0	Clustered	23	VC_44_0	23	1	1	1	4	2	1	1
Acinetobacter~phage~vB_AbaP_B5	Caudovirales	Autographiviridae	Friunavirus	44_0	Clustered	23	VC_44_0	23	1	1	1	4	2	1	1
Acinetobacter~phage~vB_AbaP_Berthold	Caudovirales	Myoviridae	Unassigned	45_0	Clustered	10	VC_45_0	10	0.1944	1	0.1944	1	1	1	0.9333
Acinetobacter~phage~vB_AbaP_D2	Caudovirales	Autographiviridae	Friunavirus	44_0	Clustered	23	VC_44_0	23	1	1	1	4	2	1	1
Acinetobacter~phage~vB_AbaP_Kimel	Caudovirales	Myoviridae	Unassigned	45_0	Clustered	10	VC_45_0	10	0.1944	1	0.1944	1	1	1	0.9333
Acinetobacter~phage~vB_AbaP_Konradin	Caudovirales	Myoviridae	Unassigned	45_0	Clustered	10	VC_45_0	10	0.1944	1	0.1944	1	1	1	0.9333
Acinetobacter~phage~vB_AbaP_Lazarus	Caudovirales	Myoviridae	Unassigned	45_0	Clustered	10	VC_45_0	10	0.1944	1	0.1944	1	1	1	0.9333
Acinetobacter~phage~vB_AbaP_PD-6A3	Caudovirales	Podoviridae	Fri1virus	44_0	Clustered	23	VC_44_0	23	1	1	1	4	2	1	1
Acinetobacter~phage~vB_AbaP_PD-AB9	Caudovirales	Podoviridae	Fri1virus	44_0	Clustered	23	VC_44_0	23	1	1	1	4	2	1	1
Acinetobacter~phage~vB_AbaS_TRS1	Caudovirales	Siphoviridae	Vieuvirus	52_0	Clustered	3	VC_52_0	3	0.8887	0.992942	0.8824	1	1	1	1
Acinetobacter~phage~vB_ApiM_fHyAci03	Caudovirales	Myoviridae	Unassigned	45_0	Clustered	10	VC_45_0	10	0.1944	1	0.1944	1	1	1	0.9333
Acinetobacter~phage~vB_ApiP_P1	Caudovirales	Autographiviridae	Friunavirus	44_0	Clustered	23	VC_44_0	23	1	1	1	4	2	1	1
Acinetobacter~phage~vB_ApiP_P2	Caudovirales	Autographiviridae	Friunavirus	44_0	Clustered	23	VC_44_0	23	1	1	1	4	2	1	1
Acinetobacter~virus~133	Caudovirales	Myoviridae	Unassigned	45_5	Clustered/Singleton	1	VC_45_5	1	0	1	0	1	1	1	1
Actinoplanes~phage~phiAsp2	Caudovirales	Siphoviridae	Unassigned	72_0	Clustered/Singleton	1	VC_72_0	1	0	1	0	1	1	1	1
Aeribacillus~phage~AP45	Caudovirales	Myoviridae	Unassigned	74_0	Clustered/Singleton	1	VC_74_0	1	0	1	0	1	1	1	1
Aeromonas~phage~2-L372D	Caudovirales	Myoviridae	Unassigned	81_0	Clustered	2	VC_81_0	2	0.0783	0.946761	0.0741	1	1	1	1
Aeromonas~phage~25AhydR2PP	Caudovirales	Autographiviridae	Aerosvirus	88_0	Clustered	14	VC_88_0	14	0.6102	1	0.6102	8	1	1	1
Aeromonas~phage~2_L372X	Caudovirales	Myoviridae	Unassigned	81_0	Clustered	2	VC_81_0	2	0.0783	0.946761	0.0741	1	1	1	1
Aeromonas~phage~4_4572	Caudovirales	Podoviridae	Unassigned	95_0	Clustered	4	VC_95_0	4	0.4319	0.99998	0.4319	1	1	1	1
Aeromonas~phage~4_L372D	Caudovirales	Myoviridae	Unassigned	81_1	Clustered/Singleton	1	VC_81_1	1	0	1	0	1	1	1	1
Aeromonas~phage~4_L372XY	Caudovirales	Myoviridae	Unassigned	81_2	Clustered/Singleton	1	VC_81_2	1	0	1	0	1	1	1	1
Aeromonas~phage~AS-gz	Caudovirales	Myoviridae	Tulanevirus	46_1	Clustered	5	VC_46_1	5	0.0795	1	0.0795	2	1	1	1
Aeromonas~phage~Aes012	Caudovirales	Myoviridae	Secunda5virus	46_1	Clustered	5	VC_46_1	5	0.0795	1	0.0795	2	1	1	1
Aeromonas~phage~Aes508	Caudovirales	Myoviridae	Secunda5virus	46_1	Clustered	5	VC_46_1	5	0.0795	1	0.0795	2	1	1	1
Aeromonas~phage~Ahp1	Caudovirales	Autographiviridae	Ahphunavirus	88_0	Clustered	14	VC_88_0	14	0.6102	1	0.6102	8	1	1	1
Aeromonas~phage~CF7	Caudovirales	Autographiviridae	Ahphunavirus	88_0	Clustered	14	VC_88_0	14	0.6102	1	0.6102	8	1	1	1
Aeromonas~phage~LAh9	Caudovirales	Podoviridae	Unassigned	95_0	Clustered	4	VC_95_0	4	0.4319	0.99998	0.4319	1	1	1	1
Aeromonas~phage~LAh_6	Caudovirales	Podoviridae	Unassigned	95_0	Clustered	4	VC_95_0	4	0.4319	0.99998	0.4319	1	1	1	1
Aeromonas~phage~LAh_8	Caudovirales	Podoviridae	Unassigned	95_0	Clustered	4	VC_95_0	4	0.4319	0.99998	0.4319	1	1	1	1
Aeromonas~phage~ZPAH7	Caudovirales	Autographiviridae	Aerosvirus	88_0	Clustered	14	VC_88_0	14	0.6102	1	0.6102	8	1	1	1
Aeromonas~phage~pAh6-C	Caudovirales	Chaseviridae	Pahsextavirus	108_0	Clustered	3	VC_108_0	3	0.2386	0.997498	0.238	2	1	1	1
Aeromonas~phage~pIS4-A	Caudovirales	Siphoviridae	Pis4avirus	110_0	Clustered	11	VC_110_0	11	0.6946	1	0.6946	3	2	2	0.9455
Aeromonas~phage~phiA8-29	Caudovirales	Ackermannviridae	Unassigned	37_5	Clustered/Singleton	1	VC_37_5	1	0	1	0	1	1	1	1
Aeromonas~phage~phiAS4	Caudovirales	Myoviridae	Secunda5virus	46_1	Clustered	5	VC_46_1	5	0.0795	1	0.0795	2	1	1	1
Aeromonas~phage~phiAS7	Caudovirales	Autographiviridae	Aerosvirus	88_0	Clustered	14	VC_88_0	14	0.6102	1	0.6102	8	1	1	1
Aeromonas~phage~vB_AsaM-56	Caudovirales	Myoviridae	Popoffvirus	43_0	Clustered	5	VC_43_0	5	0.1489	0.999998	0.1489	3	2	2	0.7
Aeromonas~virus~25	Caudovirales	Myoviridae	Secunda5virus	46_1	Clustered	5	VC_46_1	5	0.0795	1	0.0795	2	1	1	1
Aeromonas~virus~31	Caudovirales	Myoviridae	Secunda5virus	46_0	Clustered	2	VC_46_0	2	0.0194	0.95085	0.0184	2	1	1	1
Aeromonas~virus~44RR2	Caudovirales	Myoviridae	Biquartavirus	46_0	Clustered	2	VC_46_0	2	0.0194	0.95085	0.0184	2	1	1	1
Aeromonas~virus~phiO18P	Caudovirales	Myoviridae	Hp1virus	118_0	Clustered	14	VC_118_0	14	0.9322	1	0.9322	8	1	1	1
Aggregatibacter~phage~S1249	Caudovirales	Myoviridae	Unassigned	120_0	Clustered	13	VC_120_0	13	0.7992	1	0.7992	1	2	2	1
Agrobacterium~phage~Atu_ph02	Caudovirales	Autographiviridae	Atuphduovirus	89_0	Clustered	2	VC_89_0	2	0.2178	0.953658	0.2077	1	1	1	1
Agrobacterium~phage~Atu_ph03	Caudovirales	Autographiviridae	Atuphduovirus	89_0	Clustered	2	VC_89_0	2	0.2178	0.953658	0.2077	1	1	1	1
Aquamicrobium~phage~P14	Caudovirales	Autographiviridae	Aqualcavirus	90_0	Clustered	25	VC_90_0	25	0.6318	1	0.6318	15	2	1	1
Archaeal~BJ1~virus	Caudovirales	Siphoviridae	Unassigned	141_0	Clustered	2	VC_141_0	2	0.776	0.814453	0.632	1	2	2	1
Arthrobacter~phage~Abidatro	Caudovirales	Siphoviridae	Galaxyvirus	145_0	Clustered	6	VC_145_0	6	0.7478	1	0.7478	3	1	1	1
Arthrobacter~phage~Adat	Caudovirales	Podoviridae	Jasminevirus	155_0	Clustered	2	VC_155_0	2	1	1	1	1	1	1	1
Arthrobacter~phage~Amigo	Caudovirales	Siphoviridae	Amigovirus	156_0	Clustered	2	VC_156_0	2	0.7994	0.89435	0.715	1	1	1	1
Arthrobacter~phage~Andrew	Caudovirales	Siphoviridae	Andrewvirus	145_0	Clustered	6	VC_145_0	6	0.7478	1	0.7478	3	1	1	1
Arthrobacter~phage~BarretLemon	Caudovirales	Myoviridae	Marthavirus	142_0	Clustered	9	VC_142_0	9	0.6787	1	0.6787	1	1	1	1
Arthrobacter~phage~Beans	Caudovirales	Myoviridae	Marthavirus	142_0	Clustered	9	VC_142_0	9	0.6787	1	0.6787	1	1	1	1
Arthrobacter~phage~Bennie	Caudovirales	Siphoviridae	Korravirus	146_0	Clustered	9	VC_146_0	9	0.8293	1	0.8293	1	1	1	1
Arthrobacter~phage~Brent	Caudovirales	Myoviridae	Marthavirus	142_0	Clustered	9	VC_142_0	9	0.6787	1	0.6787	1	1	1	1
Arthrobacter~phage~Bridgette	Caudovirales	Siphoviridae	Bridgettevirus	161_0	Clustered	5	VC_161_0	5	0.9806	0.999776	0.9804	1	1	1	1
Arthrobacter~phage~CaptnMurica	Caudovirales	Siphoviridae	Gordonvirus	164_0	Clustered	2	VC_164_0	2	0.0885	0.957281	0.0847	1	1	1	1
Arthrobacter~phage~Circum	Caudovirales	Siphoviridae	Mudcatvirus	163_0	Clustered	2	VC_163_0	2	0.0827	0.957425	0.0792	1	1	1	1
Arthrobacter~phage~Colucci	Caudovirales	Myoviridae	Radnorvirus	143_0	Clustered	6	VC_143_0	6	0.5807	1	0.5807	2	1	1	1
Arthrobacter~phage~Constance	Caudovirales	Siphoviridae	Bridgettevirus	161_0	Clustered	5	VC_161_0	5	0.9806	0.999776	0.9804	1	1	1	1
Arthrobacter~phage~Coral	Caudovirales	Siphoviridae	Coralvirus	145_0	Clustered	6	VC_145_0	6	0.7478	1	0.7478	3	1	1	1
Arthrobacter~phage~Decurro	Caudovirales	Siphoviridae	Decurrovirus	192_0	Clustered	5	VC_192_0	5	0.6501	1	0.6501	2	1	1	1
Arthrobacter~phage~DrManhattan	Caudovirales	Siphoviridae	Manhattanvirus	160_0	Clustered	4	VC_160_0	4	0.5614	0.999976	0.5614	4	1	1	1
Arthrobacter~phage~DrRobert	Caudovirales	Siphoviridae	Korravirus	146_0	Clustered	9	VC_146_0	9	0.8293	1	0.8293	1	1	1	1
Arthrobacter~phage~DrYang	Caudovirales	Myoviridae	Radnorvirus	143_0	Clustered	6	VC_143_0	6	0.5807	1	0.5807	2	1	1	1
Arthrobacter~phage~Eileen	Caudovirales	Siphoviridae	Bridgettevirus	161_0	Clustered	5	VC_161_0	5	0.9806	0.999776	0.9804	1	1	1	1
Arthrobacter~phage~Galaxy	Caudovirales	Siphoviridae	Galaxyvirus	145_0	Clustered	6	VC_145_0	6	0.7478	1	0.7478	3	1	1	1
Arthrobacter~phage~Glenn	Caudovirales	Siphoviridae	Korravirus	146_0	Clustered	9	VC_146_0	9	0.8293	1	0.8293	1	1	1	1
Arthrobacter~phage~Gordon	Caudovirales	Siphoviridae	Gordonvirus	164_0	Clustered	2	VC_164_0	2	0.0885	0.957281	0.0847	1	1	1	1
Arthrobacter~phage~HunterDalle	Caudovirales	Siphoviridae	Korravirus	146_0	Clustered	9	VC_146_0	9	0.8293	1	0.8293	1	1	1	1
Arthrobacter~phage~Jasmine	Caudovirales	Podoviridae	Jasminevirus	155_0	Clustered	2	VC_155_0	2	1	1	1	1	1	1	1
Arthrobacter~phage~Jawnski	Caudovirales	Myoviridae	Marthavirus	142_0	Clustered	9	VC_142_0	9	0.6787	1	0.6787	1	1	1	1
Arthrobacter~phage~Joann	Caudovirales	Siphoviridae	Korravirus	146_0	Clustered	9	VC_146_0	9	0.8293	1	0.8293	1	1	1	1
Arthrobacter~phage~Judy	Caudovirales	Siphoviridae	Bridgettevirus	161_0	Clustered	5	VC_161_0	5	0.9806	0.999776	0.9804	1	1	1	1
Arthrobacter~phage~KBurrousTX	Caudovirales	Myoviridae	Radnorvirus	143_0	Clustered	6	VC_143_0	6	0.5807	1	0.5807	2	1	1	1
Arthrobacter~phage~KellEzio	Caudovirales	Siphoviridae	Kelleziovirus	197_0	Clustered	2	VC_197_0	2	1	1	1	1	1	1	1
Arthrobacter~phage~Kepler	Caudovirales	Siphoviridae	Coralvirus	145_0	Clustered	6	VC_145_0	6	0.7478	1	0.7478	3	1	1	1
Arthrobacter~phage~Kitkat	Caudovirales	Siphoviridae	Kelleziovirus	197_0	Clustered	2	VC_197_0	2	1	1	1	1	1	1	1
Arthrobacter~phage~Korra	Caudovirales	Siphoviridae	Korravirus	146_0	Clustered	9	VC_146_0	9	0.8293	1	0.8293	1	1	1	1
Arthrobacter~phage~Kuleana	Caudovirales	Siphoviridae	Coralvirus	145_0	Clustered	6	VC_145_0	6	0.7478	1	0.7478	3	1	1	1
Arthrobacter~phage~Liebe	Caudovirales	Siphoviridae	Liebevirus	160_0	Clustered	4	VC_160_0	4	0.5614	0.999976	0.5614	4	1	1	1
Arthrobacter~phage~Lymara	Caudovirales	Myoviridae	Radnorvirus	143_0	Clustered	6	VC_143_0	6	0.5807	1	0.5807	2	1	1	1
Arthrobacter~phage~Maja	Caudovirales	Siphoviridae	Majavirus	147_0	Clustered	2	VC_147_0	2	0.0872	0.907848	0.0792	2	1	1	1
Arthrobacter~phage~Martha	Caudovirales	Myoviridae	Marthavirus	142_0	Clustered	9	VC_142_0	9	0.6787	1	0.6787	1	1	1	1
Arthrobacter~phage~Molivia	Caudovirales	Siphoviridae	Amigovirus	156_0	Clustered	2	VC_156_0	2	0.7994	0.89435	0.715	1	1	1	1
Arthrobacter~phage~Mudcat	Caudovirales	Siphoviridae	Mudcatvirus	163_0	Clustered	2	VC_163_0	2	0.0827	0.957425	0.0792	1	1	1	1
Arthrobacter~phage~Mufasa8	Caudovirales	Siphoviridae	Unassigned	144_0	Clustered	2	VC_144_0	2	0.6883	0.942872	0.649	2	1	1	1
Arthrobacter~phage~Peas	Caudovirales	Siphoviridae	Bridgettevirus	161_0	Clustered	5	VC_161_0	5	0.9806	0.999776	0.9804	1	1	1	1
Arthrobacter~phage~Piccoletto	Caudovirales	Myoviridae	Marthavirus	142_0	Clustered	9	VC_142_0	9	0.6787	1	0.6787	1	1	1	1
Arthrobacter~phage~Preamble	Caudovirales	Siphoviridae	Korravirus	146_0	Clustered	9	VC_146_0	9	0.8293	1	0.8293	1	1	1	1
Arthrobacter~phage~PrincessTrina	Caudovirales	Myoviridae	Arv1virus	143_0	Clustered	6	VC_143_0	6	0.5807	1	0.5807	2	1	1	1
Arthrobacter~phage~Pumancara	Caudovirales	Siphoviridae	Korravirus	146_0	Clustered	9	VC_146_0	9	0.8293	1	0.8293	1	1	1	1
Arthrobacter~phage~Shade	Caudovirales	Myoviridae	Marthavirus	142_0	Clustered	9	VC_142_0	9	0.6787	1	0.6787	1	1	1	1
Arthrobacter~phage~Sonali	Caudovirales	Siphoviridae	Sonalivirus	144_0	Clustered	2	VC_144_0	2	0.6883	0.942872	0.649	2	1	1	1
Arthrobacter~phage~Sonny	Caudovirales	Myoviridae	Marthavirus	142_0	Clustered	9	VC_142_0	9	0.6787	1	0.6787	1	1	1	1
Arthrobacter~phage~TripleJ	Caudovirales	Siphoviridae	Unassigned	162_0	Clustered	2	VC_162_0	2	0.1024	0.936685	0.096	2	1	1	1
Arthrobacter~phage~Wayne	Caudovirales	Siphoviridae	Korravirus	146_0	Clustered	9	VC_146_0	9	0.8293	1	0.8293	1	1	1	1
Arthrobacter~phage~Yang	Caudovirales	Siphoviridae	Yangvirus	160_0	Clustered	4	VC_160_0	4	0.5614	0.999976	0.5614	4	1	1	1
Arthrobacter~phage~Zartrosa	Caudovirales	Myoviridae	Marthavirus	142_0	Clustered	9	VC_142_0	9	0.6787	1	0.6787	1	1	1	1
Arthrobacter~phage~vB_ArS-ArV2	Caudovirales	Siphoviridae	Unassigned	147_0	Clustered	2	VC_147_0	2	0.0872	0.907848	0.0792	2	1	1	1
Arthrobacter~phage~vB_ArtM-ArV1	Caudovirales	Myoviridae	Arv1virus	143_0	Clustered	6	VC_143_0	6	0.5807	1	0.5807	2	1	1	1
Bacillus~phage~AR9	Caudovirales	Myoviridae	Unassigned	209_0	Clustered	2	VC_209_0	2	0.1276	0.955067	0.1218	1	1	1	1
Bacillus~phage~Aurora	Caudovirales	Podoviridae	Unassigned	158_0	Clustered	4	VC_158_0	4	0.3786	0.999983	0.3786	1	1	1	1
Bacillus~phage~AvesoBmore	Caudovirales	Myoviridae	B4virus	208_8	Clustered	5	VC_208_8	5	0.08	1	0.08	2	2	1	1
Bacillus~phage~B4	Caudovirales	Myoviridae	B4virus	208_9	Clustered	2	VC_208_9	2	0.0191	0.93558	0.0179	1	1	1	1
Bacillus~phage~B5S	Caudovirales	Myoviridae	B4virus	208_9	Clustered	2	VC_208_9	2	0.0191	0.93558	0.0179	1	1	1	1
Bacillus~phage~BCP78	Caudovirales	Myoviridae	Tsarbombavirus	208_12	Clustered	3	VC_208_12	3	0.0427	0.998342	0.0426	1	1	1	1
Bacillus~phage~BCP8-2	Caudovirales	Myoviridae	Bc431virus	208_13	Clustered	2	VC_208_13	2	0.0218	0.946051	0.0206	1	1	1	1
Bacillus~phage~BCU4	Caudovirales	Myoviridae	Tsarbombavirus	208_12	Clustered	3	VC_208_12	3	0.0427	0.998342	0.0426	1	1	1	1
Bacillus~phage~BPS10C	Caudovirales	Herelleviridae	Wphvirus	208_11	Clustered	4	VC_208_11	4	0.0638	0.999424	0.0638	1	2	1	1
Bacillus~phage~BPS13	Caudovirales	Myoviridae	Wphvirus	208_11	Clustered	4	VC_208_11	4	0.0638	0.999424	0.0638	1	2	1	1
Bacillus~phage~BSP38	Caudovirales	Herelleviridae	Nitunavirus	208_18	Clustered	2	VC_208_18	2	0.0238	0.952972	0.0227	1	1	1	1
Bacillus~phage~Bam35c	Kalamavirales	Tectiviridae	Betatectivirus	261_0	Clustered	4	VC_261_0	4	1	1	1	1	1	1	1
Bacillus~phage~Bastille	Caudovirales	Myoviridae	Bastillevirus	208_7	Clustered	4	VC_208_7	4	0.0584	0.999985	0.0584	1	2	1	1
Bacillus~phage~Bcp1	Caudovirales	Myoviridae	Bc431virus	208_14	Clustered	4	VC_208_14	4	0.0668	0.999972	0.0668	1	1	1	1
Bacillus~phage~Belinda	Caudovirales	Herelleviridae	Wphvirus	208_0	Clustered	12	VC_208_0	12	0.2787	1	0.2787	1	2	1	1
Bacillus~phage~BigBertha	Caudovirales	Myoviridae	B4virus	208_8	Clustered	5	VC_208_8	5	0.08	1	0.08	2	2	1	1
Bacillus~phage~Bobb	Caudovirales	Myoviridae	Agatevirus	208_15	Clustered	3	VC_208_15	3	0.0532	0.998361	0.0531	1	1	1	1
Bacillus~phage~Bp8p-C	Caudovirales	Myoviridae	Agatevirus	208_15	Clustered	3	VC_208_15	3	0.0532	0.998361	0.0531	1	1	1	1
Bacillus~phage~Bp8p-T	Caudovirales	Myoviridae	Agatevirus	208_15	Clustered	3	VC_208_15	3	0.0532	0.998361	0.0531	1	1	1	1
Bacillus~phage~BtCS33	Caudovirales	Siphoviridae	Unassigned	262_0	Clustered	3	VC_262_0	3	0.2432	0.998043	0.2427	1	1	1	1
Bacillus~phage~CAM003	Caudovirales	Myoviridae	Bastillevirus	208_7	Clustered	4	VC_208_7	4	0.0584	0.999985	0.0584	1	2	1	1
Bacillus~phage~CampHawk	Caudovirales	Myoviridae	Spo1virus	219_0	Clustered	2	VC_219_0	2	0.1628	0.956307	0.1557	1	1	1	1
Bacillus~phage~Carmen17	Caudovirales	Siphoviridae	Unassigned	228_0	Clustered	4	VC_228_0	4	0.4249	0.999956	0.4249	2	1	1	0.6667
Bacillus~phage~Claudi	Caudovirales	Podoviridae	Unassigned	158_0	Clustered	4	VC_158_0	4	0.3786	0.999983	0.3786	1	1	1	1
Bacillus~phage~DIGNKC	Caudovirales	Herelleviridae	Wphvirus	208_0	Clustered	12	VC_208_0	12	0.2787	1	0.2787	1	2	1	1
Bacillus~phage~Deep~Blue	Caudovirales	Myoviridae	Bc431virus	208_14	Clustered	4	VC_208_14	4	0.0668	0.999972	0.0668	1	1	1	1
Bacillus~phage~DirtyBetty	Caudovirales	Herelleviridae	Wphvirus	208_0	Clustered	12	VC_208_0	12	0.2787	1	0.2787	1	2	1	1
Bacillus~phage~Eldridge	Caudovirales	Herelleviridae	Unassigned	208_3	Clustered/Singleton	1	VC_208_3	1	0	1	0	1	1	1	1
Bacillus~phage~Evoli	Caudovirales	Herelleviridae	Bastillevirus	208_7	Clustered	4	VC_208_7	4	0.0584	0.999985	0.0584	1	2	1	1
Bacillus~phage~Eyuki	Caudovirales	Myoviridae	Wphvirus	208_0	Clustered	12	VC_208_0	12	0.2787	1	0.2787	1	2	1	1
Bacillus~phage~Fah	Caudovirales	Siphoviridae	Wbetavirus	263_0	Clustered	3	VC_263_0	3	0.4088	0.997966	0.4079	1	1	1	1
Bacillus~phage~GIL16c	Kalamavirales	Tectiviridae	Betatectivirus	261_0	Clustered	4	VC_261_0	4	1	1	1	1	1	1	1
Bacillus~phage~Gamma	Caudovirales	Siphoviridae	Wbetavirus	263_0	Clustered	3	VC_263_0	3	0.4088	0.997966	0.4079	1	1	1	1
Bacillus~phage~Grass	Caudovirales	Myoviridae	Nit1virus	208_17	Clustered	2	VC_208_17	2	0.0249	0.952972	0.0237	1	1	1	1
Bacillus~phage~Hakuna	Caudovirales	Myoviridae	Wphvirus	208_0	Clustered	12	VC_208_0	12	0.2787	1	0.2787	1	2	1	1
Bacillus~phage~Hoody~T	Caudovirales	Herelleviridae	Bastillevirus	208_7	Clustered	4	VC_208_7	4	0.0584	0.999985	0.0584	1	2	1	1
Bacillus~phage~JBP901	Caudovirales	Myoviridae	Bc431virus	208_13	Clustered	2	VC_208_13	2	0.0218	0.946051	0.0206	1	1	1	1
Bacillus~phage~Kida	Caudovirales	Herelleviridae	Wphvirus	208_0	Clustered	12	VC_208_0	12	0.2787	1	0.2787	1	2	1	1
Bacillus~phage~MG-B1	Caudovirales	Podoviridae	Unassigned	158_0	Clustered	4	VC_158_0	4	0.3786	0.999983	0.3786	1	1	1	1
Bacillus~phage~Mater	Caudovirales	Herelleviridae	Unassigned	208_5	Clustered/Singleton	1	VC_208_5	1	0	1	0	1	1	1	1
Bacillus~phage~Megatron	Caudovirales	Myoviridae	Wphvirus	208_0	Clustered	12	VC_208_0	12	0.2787	1	0.2787	1	2	1	1
Bacillus~phage~Mgbh1	Caudovirales	Siphoviridae	Magadivirus	283_0	Clustered	2	VC_283_0	2	0.269	0.944058	0.2539	2	1	1	1
Bacillus~phage~Moonbeam	Caudovirales	Herelleviridae	Unassigned	208_4	Clustered/Singleton	1	VC_208_4	1	0	1	0	1	1	1	1
Bacillus~phage~Nemo	Caudovirales	Herelleviridae	Wphvirus	208_0	Clustered	12	VC_208_0	12	0.2787	1	0.2787	1	2	1	1
Bacillus~phage~Nigalana	Caudovirales	Herelleviridae	Wphvirus	208_0	Clustered	12	VC_208_0	12	0.2787	1	0.2787	1	2	1	1
Bacillus~phage~NotTheCreek	Caudovirales	Herelleviridae	Wphvirus	208_0	Clustered	12	VC_208_0	12	0.2787	1	0.2787	1	2	1	1
Bacillus~phage~PBC1	Caudovirales	Siphoviridae	Unassigned	228_0	Clustered	4	VC_228_0	4	0.4249	0.999956	0.4249	2	1	1	0.6667
Bacillus~phage~PM1	Caudovirales	Siphoviridae	Saundersvirus	286_0	Clustered	3	VC_286_0	3	0.1699	0.938916	0.1595	3	1	1	0.6667
Bacillus~phage~Page	Caudovirales	Podoviridae	Pagevirus	290_0	Clustered	6	VC_290_0	6	0.9995	0.93598	0.9355	1	1	1	1
Bacillus~phage~Palmer	Caudovirales	Podoviridae	Pagevirus	290_0	Clustered	6	VC_290_0	6	0.9995	0.93598	0.9355	1	1	1	1
Bacillus~phage~Pascal	Caudovirales	Podoviridae	Pagevirus	290_0	Clustered	6	VC_290_0	6	0.9995	0.93598	0.9355	1	1	1	1
Bacillus~phage~Pavlov	Caudovirales	Podoviridae	Pagevirus	290_0	Clustered	6	VC_290_0	6	0.9995	0.93598	0.9355	1	1	1	1
Bacillus~phage~PfEFR-4	Caudovirales	Siphoviridae	Unassigned	264_0	Clustered	3	VC_264_0	3	0.2827	0.998377	0.2823	1	1	1	1
Bacillus~phage~PfEFR-5	Caudovirales	Siphoviridae	Unassigned	264_0	Clustered	3	VC_264_0	3	0.2827	0.998377	0.2823	1	1	1	1
Bacillus~phage~Phrodo	Caudovirales	Herelleviridae	Bequatrovirus	208_8	Clustered	5	VC_208_8	5	0.08	1	0.08	2	2	1	1
Bacillus~phage~Pony	Caudovirales	Podoviridae	Pagevirus	290_0	Clustered	6	VC_290_0	6	0.9995	0.93598	0.9355	1	1	1	1
Bacillus~phage~Pookie	Caudovirales	Podoviridae	Pagevirus	290_0	Clustered	6	VC_290_0	6	0.9995	0.93598	0.9355	1	1	1	1
Bacillus~phage~Riley	Caudovirales	Myoviridae	B4virus	208_8	Clustered	5	VC_208_8	5	0.08	1	0.08	2	2	1	1
Bacillus~phage~SIOphi	Caudovirales	Herelleviridae	Unassigned	208_1	Clustered/Singleton	1	VC_208_1	1	0	1	0	1	1	1	1
Bacillus~phage~SageFayge	Caudovirales	Herelleviridae	Wphvirus	208_0	Clustered	12	VC_208_0	12	0.2787	1	0.2787	1	2	1	1
Bacillus~phage~SalinJah	Caudovirales	Herelleviridae	Wphvirus	208_11	Clustered	4	VC_208_11	4	0.0638	0.999424	0.0638	1	2	1	1
Bacillus~phage~Shbh1	Caudovirales	Myoviridae	Shalavirus	208_2	Clustered/Singleton	1	VC_208_2	1	0	1	0	1	1	1	1
Bacillus~phage~Slash	Caudovirales	Siphoviridae	Slashvirus	298_0	Clustered	4	VC_298_0	4	0.9992	0.916082	0.9153	1	1	1	1
Bacillus~phage~Spock	Caudovirales	Myoviridae	B4virus	208_10	Clustered/Singleton	1	VC_208_10	1	0	1	0	1	1	1	1
Bacillus~phage~Stahl	Caudovirales	Siphoviridae	Slashvirus	298_0	Clustered	4	VC_298_0	4	0.9992	0.916082	0.9153	1	1	1	1
Bacillus~phage~Staley	Caudovirales	Siphoviridae	Slashvirus	298_0	Clustered	4	VC_298_0	4	0.9992	0.916082	0.9153	1	1	1	1
Bacillus~phage~Stills	Caudovirales	Siphoviridae	Slashvirus	298_0	Clustered	4	VC_298_0	4	0.9992	0.916082	0.9153	1	1	1	1
Bacillus~phage~Stitch	Caudovirales	Podoviridae	Unassigned	158_0	Clustered	4	VC_158_0	4	0.3786	0.999983	0.3786	1	1	1	1
Bacillus~phage~TP21-L	Caudovirales	Siphoviridae	Tp21virus	266_0	Clustered	2	VC_266_0	2	0.8137	0.855578	0.6962	1	1	1	1
Bacillus~phage~Troll	Caudovirales	Myoviridae	B4virus	208_8	Clustered	5	VC_208_8	5	0.08	1	0.08	2	2	1	1
Bacillus~phage~TsarBomba	Caudovirales	Myoviridae	Tsarbombavirus	208_12	Clustered	3	VC_208_12	3	0.0427	0.998342	0.0426	1	1	1	1
Bacillus~phage~VMY22	Caudovirales	Podoviridae	Unassigned	217_0	Clustered	4	VC_217_0	4	0.177	0.999982	0.177	2	1	1	1
Bacillus~phage~W.Ph.	Caudovirales	Myoviridae	Wphvirus	208_11	Clustered	4	VC_208_11	4	0.0638	0.999424	0.0638	1	2	1	1
Bacillus~phage~Wip1	Kalamavirales	Tectiviridae	Betatectivirus	261_0	Clustered	4	VC_261_0	4	1	1	1	1	1	1	1
Bacillus~phage~Zuko	Caudovirales	Herelleviridae	Wphvirus	208_0	Clustered	12	VC_208_0	12	0.2787	1	0.2787	1	2	1	1
Bacillus~phage~phBC6A51	Caudovirales	Siphoviridae	Unassigned	265_0	Clustered	2	VC_265_0	2	0.187	0.935698	0.175	1	2	1	1
Bacillus~phage~phIS3501	Caudovirales	Siphoviridae	Unassigned	262_0	Clustered	3	VC_262_0	3	0.2432	0.998043	0.2427	1	1	1	1
Bacillus~phage~phiAGATE	Caudovirales	Myoviridae	Agatevirus	208_16	Clustered/Singleton	1	VC_208_16	1	0	1	0	1	1	1	1
Bacillus~phage~phiCM3	Caudovirales	Siphoviridae	Unassigned	262_0	Clustered	3	VC_262_0	3	0.2432	0.998043	0.2427	1	1	1	1
Bacillus~phage~phiNIT1	Caudovirales	Myoviridae	Nit1virus	208_17	Clustered	2	VC_208_17	2	0.0249	0.952972	0.0237	1	1	1	1
Bacillus~phage~vB_BboS-125	Caudovirales	Myoviridae	Unassigned	265_0	Clustered	2	VC_265_0	2	0.187	0.935698	0.175	1	2	1	1
Bacillus~phage~vB_BceM_Bc431v3	Caudovirales	Myoviridae	Bc431virus	208_14	Clustered	4	VC_208_14	4	0.0668	0.999972	0.0668	1	1	1	1
Bacillus~phage~vB_BceS-MY192	Caudovirales	Siphoviridae	Unassigned	264_0	Clustered	3	VC_264_0	3	0.2827	0.998377	0.2823	1	1	1	1
Bacillus~phage~vB_BmeM-Goe8	Caudovirales	Herelleviridae	Unassigned	208_6	Clustered/Singleton	1	VC_208_6	1	0	1	0	1	1	1	1
Bacillus~phage~vB_BsuM-Goe3	Caudovirales	Herelleviridae	Nitunavirus	208_18	Clustered	2	VC_208_18	2	0.0238	0.952972	0.0227	1	1	1	1
Bacillus~phage~vB_BtS_B83	Caudovirales	Siphoviridae	Unassigned	267_0	Clustered	2	VC_267_0	2	0.5293	0.944652	0.5	1	1	1	1
Bacillus~phage~vB_BtS_BMBtp14	Caudovirales	Siphoviridae	Unassigned	267_0	Clustered	2	VC_267_0	2	0.5293	0.944652	0.5	1	1	1	1
Bacillus~virus~1	Caudovirales	Myoviridae	Svunavirus	139_0	Clustered	2	VC_139_0	2	0.1446	0.955888	0.1382	1	1	1	1
Bacillus~virus~250	Caudovirales	Siphoviridae	Cecivirus	228_0	Clustered	4	VC_228_0	4	0.4249	0.999956	0.4249	2	1	1	0.6667
Bacillus~virus~AP50	Kalamavirales	Tectiviridae	Betatectivirus	261_0	Clustered	4	VC_261_0	4	1	1	1	1	1	1	1
Bacillus~virus~Andromeda	Caudovirales	Siphoviridae	Andromedavirus	288_0	Clustered	8	VC_288_0	8	0.9977	0.999989	0.9977	1	1	1	1
Bacillus~virus~B103	Caudovirales	Podoviridae	Phi29virus	217_0	Clustered	4	VC_217_0	4	0.177	0.999982	0.177	2	1	1	1
Bacillus~virus~BM15	Caudovirales	Myoviridae	Bc431virus	208_14	Clustered	4	VC_208_14	4	0.0668	0.999972	0.0668	1	1	1	1
Bacillus~virus~BMBtp2	Caudovirales	Siphoviridae	Tp21virus	266_0	Clustered	2	VC_266_0	2	0.8137	0.855578	0.6962	1	1	1	1
Bacillus~virus~Blastoid	Caudovirales	Siphoviridae	Andromedavirus	288_0	Clustered	8	VC_288_0	8	0.9977	0.999989	0.9977	1	1	1	1
Bacillus~virus~Curly	Caudovirales	Siphoviridae	Andromedavirus	288_0	Clustered	8	VC_288_0	8	0.9977	0.999989	0.9977	1	1	1	1
Bacillus~virus~Eoghan	Caudovirales	Siphoviridae	Andromedavirus	288_0	Clustered	8	VC_288_0	8	0.9977	0.999989	0.9977	1	1	1	1
Bacillus~virus~Finn	Caudovirales	Siphoviridae	Andromedavirus	288_0	Clustered	8	VC_288_0	8	0.9977	0.999989	0.9977	1	1	1	1
Bacillus~virus~G	Caudovirales	Myoviridae	Unassigned	292_0	Clustered/Singleton	1	VC_292_0	1	0	1	0	1	1	1	1
Bacillus~virus~GA1	Caudovirales	Podoviridae	Phi29virus	217_0	Clustered	4	VC_217_0	4	0.177	0.999982	0.177	2	1	1	1
Bacillus~virus~Glittering	Caudovirales	Siphoviridae	Andromedavirus	288_0	Clustered	8	VC_288_0	8	0.9977	0.999989	0.9977	1	1	1	1
Bacillus~virus~IEBH	Caudovirales	Siphoviridae	Cecivirus	228_0	Clustered	4	VC_228_0	4	0.4249	0.999956	0.4249	2	1	1	0.6667
Bacillus~virus~PBS1	Caudovirales	Myoviridae	Unassigned	209_0	Clustered	2	VC_209_0	2	0.1276	0.955067	0.1218	1	1	1	1
Bacillus~virus~Riggi	Caudovirales	Siphoviridae	Andromedavirus	288_0	Clustered	8	VC_288_0	8	0.9977	0.999989	0.9977	1	1	1	1
Bacillus~virus~SPO1	Caudovirales	Myoviridae	Spo1virus	219_0	Clustered	2	VC_219_0	2	0.1628	0.956307	0.1557	1	1	1	1
Bacillus~virus~SPbeta	Caudovirales	Siphoviridae	Spbetavirus	220_0	Clustered/Singleton	1	VC_220_0	1	0	1	0	1	1	1	1
Bacillus~virus~Taylor	Caudovirales	Siphoviridae	Andromedavirus	288_0	Clustered	8	VC_288_0	8	0.9977	0.999989	0.9977	1	1	1	1
Bacillus~virus~Wbeta	Caudovirales	Siphoviridae	Wbetavirus	263_0	Clustered	3	VC_263_0	3	0.4088	0.997966	0.4079	1	1	1	1
Bacillus~virus~phi29	Caudovirales	Podoviridae	Phi29virus	217_0	Clustered	4	VC_217_0	4	0.177	0.999982	0.177	2	1	1	1
Bacteriophage~APSE-2	Caudovirales	Podoviridae	Unassigned	332_0	Clustered	2	VC_332_0	2	0.0898	0.95565	0.0858	1	1	1	1
Bacteriophage~sp.	Unassigned	Unassigned	Unassigned	22_0	Clustered	20	VC_22_0	20	0.8402	1	0.8402	2	2	2	0.9947
Bacteroides~phage~B124-14	Caudovirales	Siphoviridae	Unassigned	345_0	Clustered	5	VC_345_0	5	0.1594	1	0.1594	1	2	2	1
Bacteroides~phage~B40-8	Caudovirales	Siphoviridae	Unassigned	345_0	Clustered	5	VC_345_0	5	0.1594	1	0.1594	1	2	2	1
Bdellovibrio~phage~phiMH2K	Petitvirales	Microviridae	Bdellomicrovirus	352_0	Clustered	6	VC_352_0	6	0.7059	0.999999	0.7059	3	2	2	1
Bordetella~virus~BPP1	Caudovirales	Podoviridae	Bpp1virus	331_0	Clustered	10	VC_331_0	10	0.6799	1	0.6799	2	2	2	1
Brevibacillus~phage~Abouo	Caudovirales	Myoviridae	Abouovirus	300_0	Clustered	5	VC_300_0	5	0.9175	0.999995	0.9175	2	1	1	1
Brevibacillus~phage~Davies	Caudovirales	Myoviridae	Abouovirus	300_0	Clustered	5	VC_300_0	5	0.9175	0.999995	0.9175	2	1	1	1
Brevibacillus~phage~Jimmer1	Caudovirales	Myoviridae	Jimmervirus	300_0	Clustered	5	VC_300_0	5	0.9175	0.999995	0.9175	2	1	1	1
Brevibacillus~phage~Jimmer2	Caudovirales	Myoviridae	Jimmervirus	300_0	Clustered	5	VC_300_0	5	0.9175	0.999995	0.9175	2	1	1	1
Brevibacillus~phage~Osiris	Caudovirales	Myoviridae	Jimmervirus	300_0	Clustered	5	VC_300_0	5	0.9175	0.999995	0.9175	2	1	1	1
Brevibacterium~phage~LuckyBarnes	Caudovirales	Siphoviridae	Luckybarnesvirus	162_0	Clustered	2	VC_162_0	2	0.1024	0.936685	0.096	2	1	1	1
Brochothrix~phage~BL3	Caudovirales	Siphoviridae	Unassigned	364_0	Clustered	16	VC_364_0	16	0.4676	1	0.4676	2	2	2	0.95
Brucella~phage~BiPBO1	Caudovirales	Siphoviridae	Unassigned	368_0	Clustered	2	VC_368_0	2	0.7381	0.814453	0.6012	1	1	1	1
Brucella~phage~Pr	Caudovirales	Podoviridae	Prtbvirus	369_0	Clustered	2	VC_369_0	2	0.7615	0.939655	0.7155	1	1	1	1
Brucella~phage~Tb	Caudovirales	Podoviridae	Prtbvirus	369_0	Clustered	2	VC_369_0	2	0.7615	0.939655	0.7155	1	1	1	1
Burkholderia~phage~BcepNazgul	Caudovirales	Siphoviridae	Nazgulvirus	23_0	Clustered	6	VC_23_0	6	0.1077	0.96498	0.1039	3	2	2	1
Burkholderia~phage~Bp-AMP1	Caudovirales	Autographiviridae	Ampunavirus	90_0	Clustered	25	VC_90_0	25	0.6318	1	0.6318	15	2	1	1
Burkholderia~phage~JG068	Caudovirales	Autographiviridae	Mguuvirus	90_0	Clustered	25	VC_90_0	25	0.6318	1	0.6318	15	2	1	1
Burkholderia~phage~KL3	Caudovirales	Myoviridae	Tigrvirus	119_0	Clustered	58	VC_119_0	58	0.8362	1	0.8362	15	2	2	1
Burkholderia~phage~KS14	Caudovirales	Myoviridae	Kisquattuordecimvirus	119_0	Clustered	58	VC_119_0	58	0.8362	1	0.8362	15	2	2	1
Burkholderia~phage~KS5	Caudovirales	Myoviridae	Kisquinquevirus	119_0	Clustered	58	VC_119_0	58	0.8362	1	0.8362	15	2	2	1
Burkholderia~phage~ST79	Caudovirales	Myoviridae	Nampongvirus	119_0	Clustered	58	VC_119_0	58	0.8362	1	0.8362	15	2	2	1
Burkholderia~phage~vB_BceM_AP3	Caudovirales	Myoviridae	Peduovirus	119_0	Clustered	58	VC_119_0	58	0.8362	1	0.8362	15	2	2	1
Burkholderia~phage~vB_BceS_AH2	Caudovirales	Siphoviridae	Ahduovirus	23_0	Clustered	6	VC_23_0	6	0.1077	0.96498	0.1039	3	2	2	1
Burkholderia~phage~vB_BceS_KL1	Caudovirales	Siphoviridae	Septima3virus	1_0	Clustered	12	VC_1_0	12	0.6666	1	0.6666	5	1	1	1
Burkholderia~phage~vB_BmuP_KL4	Caudovirales	Podoviridae	Kelquatrovirus	333_0	Clustered	2	VC_333_0	2	0.2458	0.948277	0.2331	2	1	1	1
Burkholderia~virus~Bcep1	Caudovirales	Myoviridae	Bcep78virus	117_0	Clustered	4	VC_117_0	4	0.7848	0.998793	0.7838	1	1	1	1
Burkholderia~virus~Bcep22	Caudovirales	Podoviridae	Bcep22virus	389_0	Clustered	4	VC_389_0	4	0.6367	0.999969	0.6366	1	1	1	1
Burkholderia~virus~Bcep43	Caudovirales	Myoviridae	Bcep78virus	117_0	Clustered	4	VC_117_0	4	0.7848	0.998793	0.7838	1	1	1	1
Burkholderia~virus~Bcep781	Caudovirales	Myoviridae	Bcep78virus	117_0	Clustered	4	VC_117_0	4	0.7848	0.998793	0.7838	1	1	1	1
Burkholderia~virus~BcepC6B	Caudovirales	Podoviridae	Bpp1virus	333_0	Clustered	2	VC_333_0	2	0.2458	0.948277	0.2331	2	1	1	1
Burkholderia~virus~BcepMu	Caudovirales	Myoviridae	Bcepmuvirus	383_0	Clustered	2	VC_383_0	2	0.1906	0.951388	0.1813	1	1	1	1
Burkholderia~virus~BcepNY3	Caudovirales	Myoviridae	Bcep78virus	117_0	Clustered	4	VC_117_0	4	0.7848	0.998793	0.7838	1	1	1	1
Burkholderia~virus~Bcepil02	Caudovirales	Podoviridae	Bcep22virus	389_0	Clustered	4	VC_389_0	4	0.6367	0.999969	0.6366	1	1	1	1
Burkholderia~virus~Bcepmigl	Caudovirales	Podoviridae	Bcep22virus	389_0	Clustered	4	VC_389_0	4	0.6367	0.999969	0.6366	1	1	1	1
Burkholderia~virus~DC1	Caudovirales	Podoviridae	Bcep22virus	389_0	Clustered	4	VC_389_0	4	0.6367	0.999969	0.6366	1	1	1	1
Burkholderia~virus~phi52237	Caudovirales	Myoviridae	P2virus	119_0	Clustered	58	VC_119_0	58	0.8362	1	0.8362	15	2	2	1
Burkholderia~virus~phiE122	Caudovirales	Myoviridae	P2virus	119_0	Clustered	58	VC_119_0	58	0.8362	1	0.8362	15	2	2	1
Burkholderia~virus~phiE202	Caudovirales	Myoviridae	P2virus	119_0	Clustered	58	VC_119_0	58	0.8362	1	0.8362	15	2	2	1
Burkholderia~virus~phiE255	Caudovirales	Myoviridae	Bcepmuvirus	383_0	Clustered	2	VC_383_0	2	0.1906	0.951388	0.1813	1	1	1	1
Campylobacter~phage~CP30A	Caudovirales	Myoviridae	Cp8virus	400_0	Clustered	6	VC_400_0	6	0.8112	1	0.8112	2	1	1	1
Campylobacter~phage~PC14	Caudovirales	Myoviridae	Fletchervirus	400_0	Clustered	6	VC_400_0	6	0.8112	1	0.8112	2	1	1	1
Campylobacter~phage~vB_CjeM_Los1	Caudovirales	Myoviridae	Fletchervirus	400_0	Clustered	6	VC_400_0	6	0.8112	1	0.8112	2	1	1	1
Campylobacter~virus~CP21	Caudovirales	Myoviridae	Cp220virus	401_0	Clustered	4	VC_401_0	4	0.6293	0.999918	0.6293	1	1	1	1
Campylobacter~virus~CP220	Caudovirales	Myoviridae	Cp220virus	401_0	Clustered	4	VC_401_0	4	0.6293	0.999918	0.6293	1	1	1	1
Campylobacter~virus~CP81	Caudovirales	Myoviridae	Cp8virus	400_0	Clustered	6	VC_400_0	6	0.8112	1	0.8112	2	1	1	1
Campylobacter~virus~CPX	Caudovirales	Myoviridae	Cp8virus	400_0	Clustered	6	VC_400_0	6	0.8112	1	0.8112	2	1	1	1
Campylobacter~virus~CPt10	Caudovirales	Myoviridae	Cp220virus	401_0	Clustered	4	VC_401_0	4	0.6293	0.999918	0.6293	1	1	1	1
Campylobacter~virus~IBB35	Caudovirales	Myoviridae	Cp220virus	401_0	Clustered	4	VC_401_0	4	0.6293	0.999918	0.6293	1	1	1	1
Campylobacter~virus~NCTC12673	Caudovirales	Myoviridae	Cp8virus	400_0	Clustered	6	VC_400_0	6	0.8112	1	0.8112	2	1	1	1
Caulobacter~phage~CcrBL10	Caudovirales	Siphoviridae	Poindextervirus	130_2	Clustered	2	VC_130_2	2	0.0764	0.843829	0.0645	2	1	1	1
Caulobacter~phage~CcrBL9	Caudovirales	Siphoviridae	Bertelyvirus	130_0	Clustered	2	VC_130_0	2	0.1349	0.941661	0.127	1	1	1	1
Caulobacter~phage~CcrColossus	Caudovirales	Siphoviridae	Colossusvirus	130_1	Clustered	2	VC_130_1	2	0.1038	0.941661	0.0978	1	1	1	1
Caulobacter~phage~CcrPW	Caudovirales	Siphoviridae	Colossusvirus	130_1	Clustered	2	VC_130_1	2	0.1038	0.941661	0.0978	1	1	1	1
Caulobacter~phage~CcrSC	Caudovirales	Siphoviridae	Bertelyvirus	130_0	Clustered	2	VC_130_0	2	0.1349	0.941661	0.127	1	1	1	1
Caulobacter~phage~Lullwater	Caudovirales	Autographiviridae	Lullwatervirus	90_0	Clustered	25	VC_90_0	25	0.6318	1	0.6318	15	2	1	1
Caulobacter~phage~Percy	Caudovirales	Autographiviridae	Percyvirus	90_0	Clustered	25	VC_90_0	25	0.6318	1	0.6318	15	2	1	1
Caulobacter~phage~Seuss	Caudovirales	Siphoviridae	Seussvirus	17_0	Clustered	2	VC_17_0	2	0.2475	0.931679	0.2306	2	1	1	1
Caulobacter~virus~Karma	Caudovirales	Siphoviridae	Phicbkvirus	130_3	Clustered	4	VC_130_3	4	0.2747	0.998887	0.2744	1	1	1	1
Caulobacter~virus~Magneto	Caudovirales	Siphoviridae	Phicbkvirus	130_3	Clustered	4	VC_130_3	4	0.2747	0.998887	0.2744	1	1	1	1
Caulobacter~virus~Rogue	Caudovirales	Siphoviridae	Phicbkvirus	130_2	Clustered	2	VC_130_2	2	0.0764	0.843829	0.0645	2	1	1	1
Caulobacter~virus~Swift	Caudovirales	Siphoviridae	Phicbkvirus	130_3	Clustered	4	VC_130_3	4	0.2747	0.998887	0.2744	1	1	1	1
Caulobacter~virus~phiCbK	Caudovirales	Siphoviridae	Phicbkvirus	130_3	Clustered	4	VC_130_3	4	0.2747	0.998887	0.2744	1	1	1	1
Celeribacter~phage~P12053L	Caudovirales	Podoviridae	Unassigned	403_0	Clustered	4	VC_403_0	4	0.669	0.999954	0.6689	1	1	1	1
Cellulophaga~phage~phi10:1	Caudovirales	Siphoviridae	Unassigned	407_0	Clustered	2	VC_407_0	2	0.4048	0.945322	0.3827	1	1	1	1
Cellulophaga~phage~phi12:1	Caudovirales	Siphoviridae	Cba181virus	409_0	Clustered	3	VC_409_0	3	0.8878	0.989354	0.8784	1	1	1	1
Cellulophaga~phage~phi12:2	Petitvirales	Microviridae	Unassigned	411_0	Clustered	2	VC_411_0	2	1	1	1	1	1	1	1
Cellulophaga~phage~phi12a:1	Petitvirales	Microviridae	Unassigned	411_0	Clustered	2	VC_411_0	2	1	1	1	1	1	1	1
Cellulophaga~phage~phi13:2	Caudovirales	Podoviridae	Unassigned	406_0	Clustered	4	VC_406_0	4	0.9	0.999819	0.8998	1	1	1	1
Cellulophaga~phage~phi17:1	Caudovirales	Siphoviridae	Cba181virus	409_0	Clustered	3	VC_409_0	3	0.8878	0.989354	0.8784	1	1	1	1
Cellulophaga~phage~phi17:2	Caudovirales	Podoviridae	Cba41virus	408_0	Clustered	2	VC_408_0	2	0.414	0.952373	0.3943	1	1	1	1
Cellulophaga~phage~phi18:1	Caudovirales	Siphoviridae	Cba181virus	409_0	Clustered	3	VC_409_0	3	0.8878	0.989354	0.8784	1	1	1	1
Cellulophaga~phage~phi18:3	Caudovirales	Podoviridae	Unassigned	406_0	Clustered	4	VC_406_0	4	0.9	0.999819	0.8998	1	1	1	1
Cellulophaga~phage~phi19:1	Caudovirales	Siphoviridae	Unassigned	407_0	Clustered	2	VC_407_0	2	0.4048	0.945322	0.3827	1	1	1	1
Cellulophaga~phage~phi19:3	Caudovirales	Podoviridae	Unassigned	406_0	Clustered	4	VC_406_0	4	0.9	0.999819	0.8998	1	1	1	1
Cellulophaga~phage~phi46:3	Caudovirales	Podoviridae	Unassigned	406_0	Clustered	4	VC_406_0	4	0.9	0.999819	0.8998	1	1	1	1
Cellulophaga~phage~phi4:1	Caudovirales	Podoviridae	Cba41virus	408_0	Clustered	2	VC_408_0	2	0.414	0.952373	0.3943	1	1	1	1
Chlamydia~phage~2	Petitvirales	Microviridae	Chlamydiamicrovirus	352_0	Clustered	6	VC_352_0	6	0.7059	0.999999	0.7059	3	2	2	1
Chlamydia~phage~4	Petitvirales	Microviridae	Chlamydiamicrovirus	352_0	Clustered	6	VC_352_0	6	0.7059	0.999999	0.7059	3	2	2	1
Chlamydia~phage~CPG1	Petitvirales	Microviridae	Chlamydiamicrovirus	352_0	Clustered	6	VC_352_0	6	0.7059	0.999999	0.7059	3	2	2	1
Chlamydia~virus~CPAR39	Petitvirales	Microviridae	Chlamydiamicrovirus	352_0	Clustered	6	VC_352_0	6	0.7059	0.999999	0.7059	3	2	2	1
Citrobacter~phage~CF1~DK-2017	Caudovirales	Drexlerviridae	Tlsvirus	419_1	Clustered	14	VC_419_1	14	0.2402	1	0.2402	4	3	2	0.8791
Citrobacter~phage~CF1~ERZ-2017	Caudovirales	Myoviridae	Moonvirus	48_7	Clustered	3	VC_48_7	3	0.0171	0.996924	0.0171	1	1	1	1
Citrobacter~phage~CR44b	Caudovirales	Autographiviridae	Kayfunavirus	423_0	Clustered	19	VC_423_0	19	0.6028	1	0.6028	3	1	1	1
Citrobacter~phage~CR8	Caudovirales	Autographiviridae	Caroctavirus	423_0	Clustered	19	VC_423_0	19	0.6028	1	0.6028	3	1	1	1
Citrobacter~phage~CVT22	Caudovirales	Podoviridae	Unassigned	99_0	Clustered	4	VC_99_0	4	0.4794	0.999972	0.4794	1	1	1	1
Citrobacter~phage~IME-CF2	Caudovirales	Myoviridae	Unassigned	101_1	Clustered	12	VC_101_1	12	0.2666	1	0.2666	1	2	2	0.9697
Citrobacter~phage~Margaery	Caudovirales	Myoviridae	Unassigned	101_1	Clustered	12	VC_101_1	12	0.2666	1	0.2666	1	2	2	0.9697
Citrobacter~phage~Merlin	Caudovirales	Myoviridae	Moonvirus	48_7	Clustered	3	VC_48_7	3	0.0171	0.996924	0.0171	1	1	1	1
Citrobacter~phage~Michonne	Caudovirales	Myoviridae	Mooglevirus	24_0	Clustered	35	VC_24_0	35	0.8833	1	0.8833	5	2	2	0.9933
Citrobacter~phage~Miller	Caudovirales	Myoviridae	Unassigned	101_1	Clustered	12	VC_101_1	12	0.2666	1	0.2666	1	2	2	0.9697
Citrobacter~phage~Moogle	Caudovirales	Myoviridae	Mooglevirus	24_0	Clustered	35	VC_24_0	35	0.8833	1	0.8833	5	2	2	0.9933
Citrobacter~phage~Moon	Caudovirales	Myoviridae	Moonvirus	48_7	Clustered	3	VC_48_7	3	0.0171	0.996924	0.0171	1	1	1	1
Citrobacter~phage~Mordin	Caudovirales	Myoviridae	Mooglevirus	24_0	Clustered	35	VC_24_0	35	0.8833	1	0.8833	5	2	2	0.9933
Citrobacter~phage~SH1	Caudovirales	Autographiviridae	Teetrevirus	424_0	Clustered	59	VC_424_0	59	0.7461	1	0.7461	11	2	1	1
Citrobacter~phage~SH2	Caudovirales	Autographiviridae	Teetrevirus	424_0	Clustered	59	VC_424_0	59	0.7461	1	0.7461	11	2	1	1
Citrobacter~phage~SH3	Caudovirales	Autographiviridae	Kayfunavirus	423_0	Clustered	19	VC_423_0	19	0.6028	1	0.6028	3	1	1	1
Citrobacter~phage~SH4	Caudovirales	Autographiviridae	Kayfunavirus	423_0	Clustered	19	VC_423_0	19	0.6028	1	0.6028	3	1	1	1
Citrobacter~phage~Sazh	Caudovirales	Drexlerviridae	Tlsvirus	419_1	Clustered	14	VC_419_1	14	0.2402	1	0.2402	4	3	2	0.8791
Citrobacter~phage~phiCFP-1	Caudovirales	Autographiviridae	Teetrevirus	424_0	Clustered	59	VC_424_0	59	0.7461	1	0.7461	11	2	1	1
Citrobacter~phage~vB_CfrM_CfP1	Caudovirales	Myoviridae	Unassigned	101_1	Clustered	12	VC_101_1	12	0.2666	1	0.2666	1	2	2	0.9697
Citrobacter~phage~vB_CroP_CrRp3	Caudovirales	Autographiviridae	Vectrevirus	437_0	Clustered	23	VC_437_0	23	0.7035	1	0.7035	7	2	1	1
Citrobacter~virus~Stevie	Caudovirales	Siphoviridae	Tlsvirus	419_1	Clustered	14	VC_419_1	14	0.2402	1	0.2402	4	3	2	0.8791
Clavibacter~phage~CMP1	Caudovirales	Siphoviridae	Cimpunavirus	157_0	Clustered	3	VC_157_0	3	0.6204	0.985907	0.6117	3	1	1	1
Clavibacter~phage~CN1A	Caudovirales	Siphoviridae	Cinunavirus	157_0	Clustered	3	VC_157_0	3	0.6204	0.985907	0.6117	3	1	1	1
Clostridium~phage~CDKM15	Caudovirales	Myoviridae	Lubbockvirus	252_0	Clustered	5	VC_252_0	5	0.3136	1	0.3136	2	1	1	1
Clostridium~phage~CDKM9	Caudovirales	Myoviridae	Lubbockvirus	252_0	Clustered	5	VC_252_0	5	0.3136	1	0.3136	2	1	1	1
Clostridium~phage~CDMH1	Caudovirales	Myoviridae	Lubbockvirus	252_1	Clustered	4	VC_252_1	4	0.2663	0.999983	0.2663	2	1	1	0.8333
Clostridium~phage~CPD2	Caudovirales	Podoviridae	Unassigned	453_0	Clustered	6	VC_453_0	6	0.404	1	0.404	1	2	2	1
Clostridium~phage~CPS1	Caudovirales	Podoviridae	Unassigned	453_0	Clustered	6	VC_453_0	6	0.404	1	0.404	1	2	2	1
Clostridium~phage~CPS2	Caudovirales	Podoviridae	Unassigned	454_0	Clustered	7	VC_454_0	7	0.6409	1	0.6409	1	2	2	1
Clostridium~phage~CpV1	Caudovirales	Podoviridae	Unassigned	453_0	Clustered	6	VC_453_0	6	0.404	1	0.404	1	2	2	1
Clostridium~phage~PhiS63	Caudovirales	Siphoviridae	Unassigned	456_0	Clustered	4	VC_456_0	4	0.1909	0.999979	0.1909	1	2	2	1
Clostridium~phage~phi24R	Caudovirales	Podoviridae	Unassigned	453_0	Clustered	6	VC_453_0	6	0.404	1	0.404	1	2	2	1
Clostridium~phage~phi3626	Caudovirales	Siphoviridae	Unassigned	456_0	Clustered	4	VC_456_0	4	0.1909	0.999979	0.1909	1	2	2	1
Clostridium~phage~phiCD111	Caudovirales	Siphoviridae	Unassigned	440_0	Clustered	4	VC_440_0	4	0.5327	0.999976	0.5327	1	2	2	1
Clostridium~phage~phiCD146	Caudovirales	Siphoviridae	Unassigned	440_0	Clustered	4	VC_440_0	4	0.5327	0.999976	0.5327	1	2	2	1
Clostridium~phage~phiCD38-2	Caudovirales	Siphoviridae	Unassigned	440_0	Clustered	4	VC_440_0	4	0.5327	0.999976	0.5327	1	2	2	1
Clostridium~phage~phiCD481-1	Caudovirales	Myoviridae	Unassigned	439_0	Clustered	6	VC_439_0	6	0.5098	1	0.5098	1	1	1	1
Clostridium~phage~phiCD505	Caudovirales	Myoviridae	Lubbockvirus	252_0	Clustered	5	VC_252_0	5	0.3136	1	0.3136	2	1	1	1
Clostridium~phage~phiCD506	Caudovirales	Myoviridae	Unassigned	439_0	Clustered	6	VC_439_0	6	0.5098	1	0.5098	1	1	1	1
Clostridium~phage~phiCDHM11	Caudovirales	Myoviridae	Unassigned	439_0	Clustered	6	VC_439_0	6	0.5098	1	0.5098	1	1	1	1
Clostridium~phage~phiCDHM13	Caudovirales	Myoviridae	Unassigned	439_0	Clustered	6	VC_439_0	6	0.5098	1	0.5098	1	1	1	1
Clostridium~phage~phiCDHM14	Caudovirales	Myoviridae	Unassigned	439_0	Clustered	6	VC_439_0	6	0.5098	1	0.5098	1	1	1	1
Clostridium~phage~phiCDHM19	Caudovirales	Myoviridae	Lubbockvirus	252_2	Clustered/Singleton	1	VC_252_2	1	0	1	0	1	1	1	1
Clostridium~phage~phiCP13O	Caudovirales	Siphoviridae	Unassigned	490_0	Clustered	7	VC_490_0	7	0.9872	1	0.9872	1	2	2	1
Clostridium~phage~phiCP26F	Caudovirales	Siphoviridae	Unassigned	490_0	Clustered	7	VC_490_0	7	0.9872	1	0.9872	1	2	2	1
Clostridium~phage~phiCP34O	Caudovirales	Siphoviridae	Unassigned	490_0	Clustered	7	VC_490_0	7	0.9872	1	0.9872	1	2	2	1
Clostridium~phage~phiCP39-O	Caudovirales	Siphoviridae	Unassigned	490_0	Clustered	7	VC_490_0	7	0.9872	1	0.9872	1	2	2	1
Clostridium~phage~phiCP7R	Caudovirales	Podoviridae	Unassigned	454_0	Clustered	7	VC_454_0	7	0.6409	1	0.6409	1	2	2	1
Clostridium~phage~phiCPV4	Caudovirales	Podoviridae	Unassigned	454_0	Clustered	7	VC_454_0	7	0.6409	1	0.6409	1	2	2	1
Clostridium~phage~phiCT19406A	Caudovirales	Siphoviridae	Unassigned	361_0	Clustered	3	VC_361_0	3	0.3342	0.998438	0.3337	1	2	1	1
Clostridium~phage~phiCT19406B	Caudovirales	Myoviridae	Unassigned	457_0	Clustered	3	VC_457_0	3	0.4147	0.998297	0.414	1	1	1	1
Clostridium~phage~phiCT453B	Caudovirales	Myoviridae	Unassigned	457_0	Clustered	3	VC_457_0	3	0.4147	0.998297	0.414	1	1	1	1
Clostridium~phage~phiCT9441A	Caudovirales	Myoviridae	Unassigned	361_0	Clustered	3	VC_361_0	3	0.3342	0.998438	0.3337	1	2	1	1
Clostridium~phage~phiCTC2A	Caudovirales	Siphoviridae	Unassigned	361_0	Clustered	3	VC_361_0	3	0.3342	0.998438	0.3337	1	2	1	1
Clostridium~phage~phiCTC2B	Caudovirales	Myoviridae	Unassigned	457_0	Clustered	3	VC_457_0	3	0.4147	0.998297	0.414	1	1	1	1
Clostridium~phage~phiMMP01	Caudovirales	Myoviridae	Lubbockvirus	252_1	Clustered	4	VC_252_1	4	0.2663	0.999983	0.2663	2	1	1	0.8333
Clostridium~phage~phiMMP02	Caudovirales	Myoviridae	Lubbockvirus	252_0	Clustered	5	VC_252_0	5	0.3136	1	0.3136	2	1	1	1
Clostridium~phage~phiMMP03	Caudovirales	Myoviridae	Lubbockvirus	252_1	Clustered	4	VC_252_1	4	0.2663	0.999983	0.2663	2	1	1	0.8333
Clostridium~phage~phiMMP04	Caudovirales	Myoviridae	Unassigned	439_0	Clustered	6	VC_439_0	6	0.5098	1	0.5098	1	1	1	1
Clostridium~phage~phiZP2	Caudovirales	Podoviridae	Unassigned	454_0	Clustered	7	VC_454_0	7	0.6409	1	0.6409	1	2	2	1
Clostridium~phage~vB_CpeS-CP51	Caudovirales	Siphoviridae	Unassigned	470_0	Clustered	4	VC_470_0	4	0.1389	0.999978	0.1389	1	2	2	1
Clostridium~virus~phiC2	Caudovirales	Myoviridae	Cd119virus	252_1	Clustered	4	VC_252_1	4	0.2663	0.999983	0.2663	2	1	1	0.8333
Clostridium~virus~phiCD27	Caudovirales	Myoviridae	Cd119virus	252_0	Clustered	5	VC_252_0	5	0.3136	1	0.3136	2	1	1	1
Corynebacterium~phage~Adelaide	Caudovirales	Siphoviridae	Unassigned	529_0	Clustered	6	VC_529_0	6	0.9021	1	0.9021	2	1	1	1
Corynebacterium~phage~BFK20	Caudovirales	Siphoviridae	Sasvirus	198_0	Clustered	3	VC_198_0	3	0.578	0.997751	0.5767	2	1	1	1
Corynebacterium~phage~C3PO	Caudovirales	Siphoviridae	Ceetrepovirus	535_0	Clustered	3	VC_535_0	3	0.4856	0.99663	0.484	1	1	1	1
Corynebacterium~phage~Darwin	Caudovirales	Siphoviridae	Ceetrepovirus	535_0	Clustered	3	VC_535_0	3	0.4856	0.99663	0.484	1	1	1	1
Corynebacterium~phage~Dina	Caudovirales	Siphoviridae	Unassigned	529_0	Clustered	6	VC_529_0	6	0.9021	1	0.9021	2	1	1	1
Corynebacterium~phage~Lederberg	Caudovirales	Siphoviridae	Unassigned	529_0	Clustered	6	VC_529_0	6	0.9021	1	0.9021	2	1	1	1
Corynebacterium~phage~SamW	Caudovirales	Siphoviridae	Samwavirus	529_0	Clustered	6	VC_529_0	6	0.9021	1	0.9021	2	1	1	1
Corynebacterium~phage~StAB	Caudovirales	Siphoviridae	Unassigned	529_0	Clustered	6	VC_529_0	6	0.9021	1	0.9021	2	1	1	1
Corynebacterium~phage~Stiles	Caudovirales	Siphoviridae	Unassigned	529_0	Clustered	6	VC_529_0	6	0.9021	1	0.9021	2	1	1	1
Corynebacterium~phage~Zion	Caudovirales	Siphoviridae	Ceetrepovirus	535_0	Clustered	3	VC_535_0	3	0.4856	0.99663	0.484	1	1	1	1
Corynebacterium~phage~phi673	Caudovirales	Siphoviridae	Ikedavirus	198_0	Clustered	3	VC_198_0	3	0.578	0.997751	0.5767	2	1	1	1
Corynebacterium~phage~phi674	Caudovirales	Siphoviridae	Ikedavirus	198_0	Clustered	3	VC_198_0	3	0.578	0.997751	0.5767	2	1	1	1
Cronobacter~phage~CR5	Caudovirales	Myoviridae	Derbicusvirus	539_0	Clustered	4	VC_539_0	4	0.1345	0.999204	0.1344	1	1	1	1
Cronobacter~phage~CS01	Caudovirales	Drexlerviridae	Unassigned	419_0	Clustered	21	VC_419_0	21	0.3529	1	0.3529	6	2	1	0.9476
Cronobacter~phage~Dev-CD-23823	Caudovirales	Autographiviridae	Cronosvirus	88_0	Clustered	14	VC_88_0	14	0.6102	1	0.6102	8	1	1	1
Cronobacter~phage~Dev2	Caudovirales	Autographiviridae	Kayfunavirus	423_0	Clustered	19	VC_423_0	19	0.6028	1	0.6028	3	1	1	1
Cronobacter~phage~ENT39118	Caudovirales	Siphoviridae	Unassigned	367_0	Clustered	15	VC_367_0	15	0.3034	1	0.3034	1	2	2	1
Cronobacter~phage~ENT47670	Caudovirales	Siphoviridae	Unassigned	109_1	Clustered	7	VC_109_1	7	0.1821	0.999999	0.1821	1	2	2	0.9048
Cronobacter~phage~ESSI-2	Caudovirales	Myoviridae	Seongnamvirus	118_0	Clustered	14	VC_118_0	14	0.9322	1	0.9322	8	1	1	1
Cronobacter~phage~GW1	Caudovirales	Autographiviridae	Kayfunavirus	423_0	Clustered	19	VC_423_0	19	0.6028	1	0.6028	3	1	1	1
Cronobacter~phage~S13	Caudovirales	Myoviridae	Unassigned	49_0	Clustered	3	VC_49_0	3	0.0485	0.998581	0.0484	1	2	2	1
Cronobacter~phage~vB_CsaM_GAP161	Caudovirales	Myoviridae	Unassigned	101_1	Clustered	12	VC_101_1	12	0.2666	1	0.2666	1	2	2	0.9697
Cronobacter~phage~vB_CsaM_GAP31	Caudovirales	Myoviridae	Se1virus	84_5	Clustered	2	VC_84_5	2	0.027	0.918307	0.0248	1	1	1	1
Cronobacter~phage~vB_CsaM_GAP32	Caudovirales	Myoviridae	Mimasvirus	127_2	Clustered/Singleton	1	VC_127_2	1	0	1	0	1	1	1	1
Cronobacter~phage~vB_CsaM_leB	Caudovirales	Myoviridae	Unassigned	101_1	Clustered	12	VC_101_1	12	0.2666	1	0.2666	1	2	2	0.9697
Cronobacter~phage~vB_CsaM_leE	Caudovirales	Myoviridae	Unassigned	101_1	Clustered	12	VC_101_1	12	0.2666	1	0.2666	1	2	2	0.9697
Cronobacter~phage~vB_CsaP_009	Caudovirales	Podoviridae	Unassigned	96_0	Clustered	2	VC_96_0	2	0.1369	0.952255	0.1303	1	1	1	1
Cronobacter~phage~vB_CsaP_GAP52	Caudovirales	Podoviridae	Unassigned	96_1	Clustered	2	VC_96_1	2	0.0818	0.953582	0.078	1	1	1	1
Cronobacter~phage~vB_CskP_GAP227	Caudovirales	Autographiviridae	Cronosvirus	88_0	Clustered	14	VC_88_0	14	0.6102	1	0.6102	8	1	1	1
Cronobacter~virus~Esp2949-1	Caudovirales	Siphoviridae	Unassigned	419_0	Clustered	21	VC_419_0	21	0.3529	1	0.3529	6	2	1	0.9476
Curvibacter~phage~P26059B	Caudovirales	Autographiviridae	Kalppathivirus	90_0	Clustered	25	VC_90_0	25	0.6318	1	0.6318	15	2	1	1
Cyanophage~9515-10a	Caudovirales	Autographiviridae	Tangaroavirus	550_0	Clustered	20	VC_550_0	20	0.8859	1	0.8859	16	2	1	1
Cyanophage~KBS-P-1A	Caudovirales	Autographiviridae	Unassigned	550_0	Clustered	20	VC_550_0	20	0.8859	1	0.8859	16	2	1	1
Cyanophage~MED4-117	Caudovirales	Siphoviridae	Unassigned	554_0	Clustered	2	VC_554_0	2	0.7799	0.855578	0.6673	1	1	1	1
Cyanophage~NATL1A-7	Caudovirales	Autographiviridae	Cheungvirus	550_0	Clustered	20	VC_550_0	20	0.8859	1	0.8859	16	2	1	1
Cyanophage~NATL2A-133	Caudovirales	Autographiviridae	Tangaroavirus	550_0	Clustered	20	VC_550_0	20	0.8859	1	0.8859	16	2	1	1
Cyanophage~P-RSM1	Caudovirales	Myoviridae	Unassigned	36_32	Clustered	2	VC_36_32	2	0.0124	0.891404	0.0111	1	1	1	1
Cyanophage~P-RSM6	Caudovirales	Myoviridae	Libanvirus	36_11	Clustered/Singleton	1	VC_36_11	1	0	1	0	1	1	1	1
Cyanophage~P-SSP2	Caudovirales	Autographiviridae	Tritonvirus	550_0	Clustered	20	VC_550_0	20	0.8859	1	0.8859	16	2	1	1
Cyanophage~P-TIM40	Caudovirales	Myoviridae	Libanvirus	36_22	Clustered/Singleton	1	VC_36_22	1	0	1	0	1	1	1	1
Cyanophage~PP	Caudovirales	Podoviridae	Unassigned	134_0	Clustered	2	VC_134_0	2	0.5532	0.868224	0.4803	1	1	1	1
Cyanophage~PSS2	Caudovirales	Siphoviridae	Unassigned	556_0	Clustered	2	VC_556_0	2	0.9284	0.729854	0.6776	1	1	1	1
Cyanophage~S-RIM12	Caudovirales	Myoviridae	Brizovirus	36_7	Clustered	7	VC_36_7	7	0.0756	1	0.0756	2	1	1	0.7619
Cyanophage~S-RIM32	Caudovirales	Myoviridae	Unassigned	36_18	Clustered/Singleton	1	VC_36_18	1	0	1	0	1	1	1	1
Cyanophage~S-RIM44	Caudovirales	Myoviridae	Vellamovirus	36_17	Clustered	2	VC_36_17	2	0.0147	0.930651	0.0137	1	1	1	1
Cyanophage~S-RIM50	Caudovirales	Myoviridae	Neptunevirus	36_4	Clustered	3	VC_36_4	3	0.0235	0.980528	0.023	1	1	1	1
Cyanophage~S-TIM4	Caudovirales	Myoviridae	Thaumasvirus	36_31	Clustered	2	VC_36_31	2	0.0122	0.886418	0.0108	1	1	1	1
Cyanophage~S-TIM5	Caudovirales	Myoviridae	Aurunvirus	555_0	Clustered/Singleton	1	VC_555_0	1	0	1	0	1	1	1	1
Cyanophage~SS120-1	Caudovirales	Autographiviridae	Banchanvirus	550_0	Clustered	20	VC_550_0	20	0.8859	1	0.8859	16	2	1	1
Cyanophage~Syn30	Caudovirales	Myoviridae	Leucotheavirus	36_34	Clustered	2	VC_36_34	2	0.0117	0.88265	0.0103	1	1	1	1
Delftia~phage~IME-DE1	Caudovirales	Autographiviridae	Piedvirus	425_0	Clustered	4	VC_425_0	4	0.0867	0.999987	0.0867	4	1	1	1
Delftia~phage~RG-2014	Caudovirales	Podoviridae	Jwalphavirus	6_0	Clustered	22	VC_6_0	22	0.501	1	0.501	7	2	2	0.7792
Dickeya~phage~BF25/12	Caudovirales	Autographiviridae	Stompvirus	91_0	Clustered	16	VC_91_0	16	0.744	1	0.744	4	1	1	1
Dickeya~phage~Ninurta	Caudovirales	Autographiviridae	Ningirsuvirus	427_0	Clustered	2	VC_427_0	2	0.0248	0.957341	0.0238	2	1	1	1
Dickeya~phage~RC-2014	Caudovirales	Ackermannviridae	Limestonevirus	37_2	Clustered	11	VC_37_2	11	0.0887	0.999748	0.0887	4	2	2	1
Dickeya~phage~vB_DsoM_AD1	Caudovirales	Myoviridae	Alexandravirus	560_1	Clustered	3	VC_560_1	3	0.1875	0.995271	0.1866	2	1	1	1
Dickeya~phage~vB_DsoM_JA11	Caudovirales	Myoviridae	Salmondvirus	560_0	Clustered	2	VC_560_0	2	0.086	0.923845	0.0794	1	1	1	1
Dickeya~phage~vB_DsoM_JA29	Caudovirales	Myoviridae	Salmondvirus	560_0	Clustered	2	VC_560_0	2	0.086	0.923845	0.0794	1	1	1	1
Dickeya~phage~vB_DsoP_JA10	Caudovirales	Autographiviridae	Teseptimavirus	427_0	Clustered	2	VC_427_0	2	0.0248	0.957341	0.0238	2	1	1	1
Dickeya~virus~Limestone	Caudovirales	Ackermannviridae	Limestonevirus	37_2	Clustered	11	VC_37_2	11	0.0887	0.999748	0.0887	4	2	2	1
Edwardsiella~phage~GF-2	Caudovirales	Myoviridae	Gofduovirus	43_0	Clustered	5	VC_43_0	5	0.1489	0.999998	0.1489	3	2	2	0.7
Edwardsiella~phage~KF-1	Caudovirales	Podoviridae	Kf1virus	566_0	Clustered	3	VC_566_0	3	1	1	1	2	1	1	1
Edwardsiella~phage~PEi20	Caudovirales	Myoviridae	Unassigned	48_3	Clustered	2	VC_48_3	2	0.0087	0.92949	0.008	1	1	1	1
Edwardsiella~phage~eiAU	Caudovirales	Siphoviridae	Eiauvirus	547_0	Clustered	2	VC_547_0	2	0.1226	0.954637	0.1171	1	1	1	1
Edwardsiella~phage~eiAU-183	Caudovirales	Siphoviridae	Eiauvirus	547_0	Clustered	2	VC_547_0	2	0.1226	0.954637	0.1171	1	1	1	1
Edwardsiella~virus~pEt-SU	Caudovirales	Myoviridae	Unassigned	538_0	Clustered	2	VC_538_0	2	0.0918	0.952475	0.0874	1	1	1	1
Enteritis_DCY0308.NODE_5622_6212	Unassigned	Unassigned	Unassigned	576_0	Clustered	2	VC_576_0	2	0.0053	0.952022	0.005	1	1	1	1
Enterobacter~phage~Arya	Caudovirales	Myoviridae	Jilinvirus	111_0	Clustered	5	VC_111_0	5	0.3437	1	0.3437	2	1	1	1
Enterobacter~phage~CC31	Caudovirales	Myoviridae	Cc31virus	48_9	Clustered	3	VC_48_9	3	0.0171	0.996561	0.017	2	2	2	1
Enterobacter~phage~E-2	Caudovirales	Autographiviridae	Teetrevirus	424_0	Clustered	59	VC_424_0	59	0.7461	1	0.7461	11	2	1	1
Enterobacter~phage~E-3	Caudovirales	Autographiviridae	Teetrevirus	424_0	Clustered	59	VC_424_0	59	0.7461	1	0.7461	11	2	1	1
Enterobacter~phage~Ec_L1	Caudovirales	Drexlerviridae	Eclunavirus	419_0	Clustered	21	VC_419_0	21	0.3529	1	0.3529	6	2	1	0.9476
Enterobacter~phage~Enc34	Caudovirales	Siphoviridae	Chivirus	22_0	Clustered	20	VC_22_0	20	0.8402	1	0.8402	2	2	2	0.9947
Enterobacter~phage~EspM4VN	Caudovirales	Ackermannviridae	Agtrevirus	37_2	Clustered	11	VC_37_2	11	0.0887	0.999748	0.0887	4	2	2	1
Enterobacter~phage~PG7	Caudovirales	Myoviridae	Cc31virus	48_9	Clustered	3	VC_48_9	3	0.0171	0.996561	0.017	2	2	2	1
Enterobacter~phage~Tyrion	Caudovirales	Podoviridae	Uetakevirus	112_0	Clustered	9	VC_112_0	9	0.7165	1	0.7165	3	2	2	1
Enterobacter~phage~phiEap-2	Caudovirales	Siphoviridae	Cornellvirus	360_0	Clustered	25	VC_360_0	25	0.8863	1	0.8863	6	2	2	1
Enterobacter~phage~phiEap-3	Caudovirales	Myoviridae	Kp15virus	101_0	Clustered	11	VC_101_0	11	0.2387	1	0.2387	3	2	2	1
Enterobacter~phage~phiKDA1	Caudovirales	Autographiviridae	Koutsourovirus	543_0	Clustered	21	VC_543_0	21	0.7402	1	0.7402	3	2	1	1
Enterobacter~phage~phiT5282H	Caudovirales	Myoviridae	Peduovirus	119_0	Clustered	58	VC_119_0	58	0.8362	1	0.8362	15	2	2	1
Enterobacter~phage~vB_EclM_CIP9	Caudovirales	Myoviridae	Unassigned	48_3	Clustered	2	VC_48_3	2	0.0087	0.92949	0.008	1	1	1	1
Enterobacter~virus~F20	Caudovirales	Siphoviridae	Kp36virus	420_0	Clustered	18	VC_420_0	18	0.4906	1	0.4906	2	2	1	1
Enterobacteria~phage~13a	Caudovirales	Autographiviridae	Teseptimavirus	424_0	Clustered	59	VC_424_0	59	0.7461	1	0.7461	11	2	1	1
Enterobacteria~phage~285P	Caudovirales	Autographiviridae	Teseptimavirus	424_0	Clustered	59	VC_424_0	59	0.7461	1	0.7461	11	2	1	1
Enterobacteria~phage~BA14	Caudovirales	Autographiviridae	Berlinvirus	424_0	Clustered	59	VC_424_0	59	0.7461	1	0.7461	11	2	1	1
Enterobacteria~phage~Bp7	Caudovirales	Myoviridae	Js98virus	48_1	Clustered	8	VC_48_1	8	0.0583	1	0.0583	2	1	1	0.9643
Enterobacteria~phage~C-1~INW-2012	Levivirales	Leviviridae	Levivirus	585_0	Clustered	4	VC_585_0	4	1	0	0	1	1	1	1
Enterobacteria~phage~DT571/2	Caudovirales	Demerecviridae	Tequintavirus	103_1	Clustered	25	VC_103_1	25	0.3873	1	0.3873	2	2	1	1
Enterobacteria~phage~EcoDS1	Caudovirales	Autographiviridae	Teseptimavirus	423_0	Clustered	19	VC_423_0	19	0.6028	1	0.6028	3	1	1	1
Enterobacteria~phage~GEC-3S	Caudovirales	Myoviridae	Krischvirus	50_0	Clustered	5	VC_50_0	5	0.0891	1	0.0891	2	1	1	1
Enterobacteria~phage~HK106	Caudovirales	Siphoviridae	Hk97virus	337_0	Clustered	13	VC_337_0	13	0.3116	1	0.3116	2	1	1	1
Enterobacteria~phage~HK140	Caudovirales	Siphoviridae	Hendrixvirus	337_0	Clustered	13	VC_337_0	13	0.3116	1	0.3116	2	1	1	1
Enterobacteria~phage~HK620	Caudovirales	Podoviridae	Lederbergvirus	334_0	Clustered	27	VC_334_0	27	0.4949	1	0.4949	3	2	2	0.7265
Enterobacteria~phage~Hgal1	Levivirales	Leviviridae	Levivirus	585_0	Clustered	4	VC_585_0	4	1	0	0	1	1	1	1
Enterobacteria~phage~IME08	Caudovirales	Myoviridae	Js98virus	48_1	Clustered	8	VC_48_1	8	0.0583	1	0.0583	2	1	1	0.9643
Enterobacteria~phage~IME10	Caudovirales	Podoviridae	Lederbergvirus	334_0	Clustered	27	VC_334_0	27	0.4949	1	0.4949	3	2	2	0.7265
Enterobacteria~phage~IME_EC2	Caudovirales	Siphoviridae	Murrayvirus	335_0	Clustered	7	VC_335_0	7	0.6613	1	0.6613	5	3	2	1
Enterobacteria~phage~If1	Tubulavirales	Inoviridae	Infulavirus	589_0	Clustered	3	VC_589_0	3	0.6877	0.963901	0.6629	2	1	1	1
Enterobacteria~phage~J8-65	Caudovirales	Autographiviridae	Unassigned	92_0	Clustered	3	VC_92_0	3	0.1608	0.998481	0.1605	3	2	1	1
Enterobacteria~phage~K1F	Caudovirales	Autographiviridae	Teseptimavirus	423_0	Clustered	19	VC_423_0	19	0.6028	1	0.6028	3	1	1	1
Enterobacteria~phage~M	Levivirales	Leviviridae	Levivirus	585_0	Clustered	4	VC_585_0	4	1	0	0	1	1	1	1
Enterobacteria~phage~MS2	Levivirales	Leviviridae	Levivirus	590_0	Clustered	2	VC_590_0	2	1	1	1	1	1	1	1
Enterobacteria~phage~P88	Caudovirales	Myoviridae	Peduovirus	119_0	Clustered	58	VC_119_0	58	0.8362	1	0.8362	15	2	2	1
Enterobacteria~phage~PR4	Kalamavirales	Tectiviridae	Alphatectivirus	592_0	Clustered	2	VC_592_0	2	0.9523	0.76025	0.724	1	1	1	1
Enterobacteria~phage~PRD1	Kalamavirales	Tectiviridae	Alphatectivirus	592_0	Clustered	2	VC_592_0	2	0.9523	0.76025	0.724	1	1	1	1
Enterobacteria~phage~RB27	Caudovirales	Myoviridae	Tequatrovirus	48_6	Clustered	32	VC_48_6	32	0.3064	1	0.3064	3	1	1	0.9839
Enterobacteria~phage~RB51	Caudovirales	Myoviridae	Tequatrovirus	48_6	Clustered	32	VC_48_6	32	0.3064	1	0.3064	3	1	1	0.9839
Enterobacteria~phage~RB68	Caudovirales	Myoviridae	Tequatrovirus	48_6	Clustered	32	VC_48_6	32	0.3064	1	0.3064	3	1	1	0.9839
Enterobacteria~phage~SP	Levivirales	Leviviridae	Allolevivirus	593_0	Clustered	3	VC_593_0	3	1	0	0	1	1	1	1
Enterobacteria~phage~ST104	Caudovirales	Podoviridae	Lederbergvirus	334_0	Clustered	27	VC_334_0	27	0.4949	1	0.4949	3	2	2	0.7265
Enterobacteria~phage~Sf101	Caudovirales	Podoviridae	Lederbergvirus	334_0	Clustered	27	VC_334_0	27	0.4949	1	0.4949	3	2	2	0.7265
Enterobacteria~phage~SfI	Caudovirales	Myoviridae	Unassigned	125_0	Clustered	18	VC_125_0	18	0.5	1	0.5	1	2	2	0.9739
Enterobacteria~phage~SfV	Caudovirales	Myoviridae	Unassigned	125_0	Clustered	18	VC_125_0	18	0.5	1	0.5	1	2	2	0.9739
Enterobacteria~phage~T3	Caudovirales	Autographiviridae	Teetrevirus	424_0	Clustered	59	VC_424_0	59	0.7461	1	0.7461	11	2	1	1
Enterobacteria~phage~T7M	Caudovirales	Autographiviridae	Teetrevirus	424_0	Clustered	59	VC_424_0	59	0.7461	1	0.7461	11	2	1	1
Enterobacteria~phage~UAB_Phi20	Caudovirales	Podoviridae	Lederbergvirus	334_0	Clustered	27	VC_334_0	27	0.4949	1	0.4949	3	2	2	0.7265
Enterobacteria~phage~UAB_Phi78	Caudovirales	Autographiviridae	Zindervirus	437_0	Clustered	23	VC_437_0	23	0.7035	1	0.7035	7	2	1	1
Enterobacteria~phage~VT2-Sakai	Caudovirales	Podoviridae	Traversvirus	390_1	Clustered	17	VC_390_1	17	0.5883	1	0.5883	6	2	2	0.8456
Enterobacteria~phage~VT2phi_272	Caudovirales	Podoviridae	Oslovirus	390_1	Clustered	17	VC_390_1	17	0.5883	1	0.5883	6	2	2	0.8456
Enterobacteria~phage~WA13~sensu~lato	Petitvirales	Microviridae	Alphatrevirus	586_0	Clustered	11	VC_586_0	11	0.6925	1	0.6925	2	1	1	1
Enterobacteria~phage~fd	Tubulavirales	Inoviridae	Inovirus	589_0	Clustered	3	VC_589_0	3	0.6877	0.963901	0.6629	2	1	1	1
Enterobacteria~phage~fiAA91-ss	Caudovirales	Myoviridae	Peduovirus	119_0	Clustered	58	VC_119_0	58	0.8362	1	0.8362	15	2	2	1
Enterobacteria~phage~mEp235	Caudovirales	Siphoviridae	Hendrixvirus	337_0	Clustered	13	VC_337_0	13	0.3116	1	0.3116	2	1	1	1
Enterobacteria~phage~phi92	Caudovirales	Myoviridae	Unassigned	94_1	Clustered/Singleton	1	VC_94_1	1	0	1	0	1	1	1	1
Enterobacteria~phage~phiEcoM-GJ1	Caudovirales	Chaseviridae	Carltongylesvirus	107_0	Clustered	11	VC_107_0	11	0.8518	1	0.8518	5	2	1	1
Enterobacteria~phage~phiP27	Caudovirales	Myoviridae	Unassigned	125_0	Clustered	18	VC_125_0	18	0.5	1	0.5	1	2	2	0.9739
Enterobacteria~phage~vB_EcoP_ACG-C91	Caudovirales	Autographiviridae	Zindervirus	437_0	Clustered	23	VC_437_0	23	0.7035	1	0.7035	7	2	1	1
Enterobacteria~phage~vB_EcoP_IME390	Caudovirales	Autographiviridae	Teseptimavirus	424_0	Clustered	59	VC_424_0	59	0.7461	1	0.7461	11	2	1	1
Enterobacteria~phage~vB_EcoS_IME18	Caudovirales	Drexlerviridae	Tunavirus	419_0	Clustered	21	VC_419_0	21	0.3529	1	0.3529	6	2	1	0.9476
Enterobacteria~phage~vB_EcoS_IME347	Caudovirales	Drexlerviridae	Unassigned	419_0	Clustered	21	VC_419_0	21	0.3529	1	0.3529	6	2	1	0.9476
Enterobacteria~phage~vB_EcoS_NBD2	Caudovirales	Drexlerviridae	Eclunavirus	419_0	Clustered	21	VC_419_0	21	0.3529	1	0.3529	6	2	1	0.9476
Enterobacterial~phage~mEp390	Caudovirales	Siphoviridae	Unassigned	367_0	Clustered	15	VC_367_0	15	0.3034	1	0.3034	1	2	2	1
Enterobacteriaphage~UAB_Phi87	Caudovirales	Myoviridae	Felixo1virus	24_0	Clustered	35	VC_24_0	35	0.8833	1	0.8833	5	2	2	0.9933
Enterococcus~phage~AUEF3	Caudovirales	Siphoviridae	Efquatrovirus	595_0	Clustered	16	VC_595_0	16	0.8991	1	0.8991	2	1	1	1
Enterococcus~phage~BC611	Caudovirales	Siphoviridae	Sap6virus	284_0	Clustered	6	VC_284_0	6	0.9005	1	0.9005	2	1	1	1
Enterococcus~phage~EF62phi	Caudovirales	Podoviridae	Unassigned	596_0	Clustered	2	VC_596_0	2	0.7463	0.906109	0.6762	1	2	2	1
Enterococcus~phage~EFC-1	Caudovirales	Siphoviridae	Unassigned	230_0	Clustered	10	VC_230_0	10	0.532	1	0.532	1	2	2	0.9333
Enterococcus~phage~Ec-ZZ2	Caudovirales	Siphoviridae	Efquatrovirus	595_0	Clustered	16	VC_595_0	16	0.8991	1	0.8991	2	1	1	1
Enterococcus~phage~EfaCPT1	Caudovirales	Siphoviridae	Efquatrovirus	595_0	Clustered	16	VC_595_0	16	0.8991	1	0.8991	2	1	1	1
Enterococcus~phage~IME-EF4	Caudovirales	Siphoviridae	Efquatrovirus	595_0	Clustered	16	VC_595_0	16	0.8991	1	0.8991	2	1	1	1
Enterococcus~phage~IME-EFm1	Caudovirales	Siphoviridae	Unassigned	595_0	Clustered	16	VC_595_0	16	0.8991	1	0.8991	2	1	1	1
Enterococcus~phage~IME-EFm5	Caudovirales	Siphoviridae	Unassigned	595_0	Clustered	16	VC_595_0	16	0.8991	1	0.8991	2	1	1	1
Enterococcus~phage~IMEEF1	Caudovirales	Siphoviridae	Sap6virus	284_0	Clustered	6	VC_284_0	6	0.9005	1	0.9005	2	1	1	1
Enterococcus~phage~IME_EF3	Caudovirales	Siphoviridae	Efquatrovirus	595_0	Clustered	16	VC_595_0	16	0.8991	1	0.8991	2	1	1	1
Enterococcus~phage~LY0322	Caudovirales	Siphoviridae	Efquatrovirus	595_0	Clustered	16	VC_595_0	16	0.8991	1	0.8991	2	1	1	1
Enterococcus~phage~PMBT2	Caudovirales	Siphoviridae	Efquatrovirus	595_0	Clustered	16	VC_595_0	16	0.8991	1	0.8991	2	1	1	1
Enterococcus~phage~SANTOR1	Caudovirales	Siphoviridae	Efquatrovirus	595_0	Clustered	16	VC_595_0	16	0.8991	1	0.8991	2	1	1	1
Enterococcus~phage~SAP6	Caudovirales	Siphoviridae	Sap6virus	284_0	Clustered	6	VC_284_0	6	0.9005	1	0.9005	2	1	1	1
Enterococcus~phage~VD13	Caudovirales	Siphoviridae	Sap6virus	284_0	Clustered	6	VC_284_0	6	0.9005	1	0.9005	2	1	1	1
Enterococcus~phage~phiEf11	Caudovirales	Siphoviridae	Unassigned	230_0	Clustered	10	VC_230_0	10	0.532	1	0.532	1	2	2	0.9333
Enterococcus~phage~phiFL1A	Caudovirales	Siphoviridae	Phifelvirus	234_0	Clustered	31	VC_234_0	31	0.7417	1	0.7417	2	2	2	0.972
Enterococcus~phage~phiFL2A	Caudovirales	Siphoviridae	Phifelvirus	234_0	Clustered	31	VC_234_0	31	0.7417	1	0.7417	2	2	2	0.972
Enterococcus~phage~phiFL3A	Caudovirales	Siphoviridae	Phifelvirus	364_0	Clustered	16	VC_364_0	16	0.4676	1	0.4676	2	2	2	0.95
Enterococcus~phage~phiSHEF2	Caudovirales	Siphoviridae	Efquatrovirus	595_0	Clustered	16	VC_595_0	16	0.8991	1	0.8991	2	1	1	1
Enterococcus~phage~phiSHEF4	Caudovirales	Siphoviridae	Efquatrovirus	595_0	Clustered	16	VC_595_0	16	0.8991	1	0.8991	2	1	1	1
Enterococcus~phage~phiSHEF5	Caudovirales	Siphoviridae	Efquatrovirus	595_0	Clustered	16	VC_595_0	16	0.8991	1	0.8991	2	1	1	1
Enterococcus~phage~vB_EfaP_IME195	Caudovirales	Podoviridae	Unassigned	607_0	Clustered	4	VC_607_0	4	0.191	0.99997	0.191	3	1	1	1
Enterococcus~phage~vB_EfaS_AL2	Caudovirales	Siphoviridae	Efquatrovirus	595_0	Clustered	16	VC_595_0	16	0.8991	1	0.8991	2	1	1	1
Enterococcus~phage~vB_EfaS_AL3	Caudovirales	Siphoviridae	Efquatrovirus	595_0	Clustered	16	VC_595_0	16	0.8991	1	0.8991	2	1	1	1
Enterococcus~phage~vB_EfaS_IME196	Caudovirales	Siphoviridae	Efquatrovirus	595_0	Clustered	16	VC_595_0	16	0.8991	1	0.8991	2	1	1	1
Enterococcus~phage~vB_EfaS_IME197	Caudovirales	Siphoviridae	Unassigned	230_0	Clustered	10	VC_230_0	10	0.532	1	0.532	1	2	2	0.9333
Enterococcus~phage~vB_EfaS_IME198	Caudovirales	Siphoviridae	Saphexavirus	284_0	Clustered	6	VC_284_0	6	0.9005	1	0.9005	2	1	1	1
Enterococcus~phage~vB_Efae230P-4	Caudovirales	Podoviridae	Unassigned	607_0	Clustered	4	VC_607_0	4	0.191	0.99997	0.191	3	1	1	1
Erwinia~amylovora~phage~Era103	Caudovirales	Podoviridae	Sp6virus	437_0	Clustered	23	VC_437_0	23	0.7035	1	0.7035	7	2	1	1
Erwinia~phage~Derbicus	Caudovirales	Myoviridae	Derbicusvirus	539_0	Clustered	4	VC_539_0	4	0.1345	0.999204	0.1344	1	1	1	1
Erwinia~phage~ENT90	Caudovirales	Myoviridae	Entnonagintavirus	119_0	Clustered	58	VC_119_0	58	0.8362	1	0.8362	15	2	2	1
Erwinia~phage~Ea35-70	Caudovirales	Myoviridae	Agrican357virus	540_0	Clustered	6	VC_540_0	6	0.4559	1	0.4559	2	1	1	1
Erwinia~phage~Ea9-2	Caudovirales	Podoviridae	Ea92virus	6_0	Clustered	22	VC_6_0	22	0.501	1	0.501	7	2	2	0.7792
Erwinia~phage~EtG	Caudovirales	Myoviridae	Eganvirus	119_0	Clustered	58	VC_119_0	58	0.8362	1	0.8362	15	2	2	1
Erwinia~phage~FE44	Caudovirales	Autographiviridae	Berlinvirus	424_0	Clustered	59	VC_424_0	59	0.7461	1	0.7461	11	2	1	1
Erwinia~phage~Faunus	Caudovirales	Chaseviridae	Faunusvirus	107_0	Clustered	11	VC_107_0	11	0.8518	1	0.8518	5	2	1	1
Erwinia~phage~Hena1	Caudovirales	Myoviridae	Unassigned	84_2	Clustered	2	VC_84_2	2	0.0286	0.915684	0.0262	1	1	1	1
Erwinia~phage~Machina	Caudovirales	Myoviridae	Machinavirus	539_3	Clustered	2	VC_539_3	2	0.0415	0.87179	0.0362	1	1	1	1
Erwinia~phage~PhiEaH1	Caudovirales	Myoviridae	Iapetusvirus	541_1	Clustered/Singleton	1	VC_541_1	1	0	1	0	1	1	1	1
Erwinia~phage~Wellington	Caudovirales	Myoviridae	Wellingtonvirus	539_1	Clustered	2	VC_539_1	2	0.0417	0.881452	0.0367	2	1	1	1
Erwinia~phage~pEp_SNUABM_01	Caudovirales	Myoviridae	Unassigned	84_2	Clustered	2	VC_84_2	2	0.0286	0.915684	0.0262	1	1	1	1
Erwinia~phage~phiEa100	Caudovirales	Autographiviridae	Eracentumvirus	437_0	Clustered	23	VC_437_0	23	0.7035	1	0.7035	7	2	1	1
Erwinia~phage~phiEa104	Caudovirales	Myoviridae	Ea214virus	132_0	Clustered	3	VC_132_0	3	0.0551	0.998379	0.0551	1	1	1	1
Erwinia~phage~phiEa21-4	Caudovirales	Myoviridae	Ea214virus	132_0	Clustered	3	VC_132_0	3	0.0551	0.998379	0.0551	1	1	1	1
Erwinia~phage~phiEa2809	Caudovirales	Ackermannviridae	Unassigned	37_4	Clustered	2	VC_37_4	2	0.0084	0.911238	0.0077	1	1	1	1
Erwinia~phage~phiEaH2	Caudovirales	Myoviridae	Eah2virus	539_2	Clustered	3	VC_539_2	3	0.0868	0.981945	0.0852	2	1	1	1
Erwinia~phage~phiEaP-8	Caudovirales	Podoviridae	Johnsonvirus	6_0	Clustered	22	VC_6_0	22	0.501	1	0.501	7	2	2	0.7792
Erwinia~phage~vB_Eam-MM7	Caudovirales	Myoviridae	Ea214virus	132_0	Clustered	3	VC_132_0	3	0.0551	0.998379	0.0551	1	1	1	1
Erwinia~phage~vB_EamM-Bue1	Caudovirales	Ackermannviridae	Unassigned	37_4	Clustered	2	VC_37_4	2	0.0084	0.911238	0.0077	1	1	1	1
Erwinia~phage~vB_EamM-Y2	Caudovirales	Chaseviridae	Loessnervirus	107_0	Clustered	11	VC_107_0	11	0.8518	1	0.8518	5	2	1	1
Erwinia~phage~vB_EamM_Alexandra	Caudovirales	Myoviridae	Alexandravirus	560_1	Clustered	3	VC_560_1	3	0.1875	0.995271	0.1866	2	1	1	1
Erwinia~phage~vB_EamM_Asesino	Caudovirales	Myoviridae	Eah2virus	539_2	Clustered	3	VC_539_2	3	0.0868	0.981945	0.0852	2	1	1	1
Erwinia~phage~vB_EamM_Caitlin	Caudovirales	Myoviridae	Machinavirus	539_4	Clustered	2	VC_539_4	2	0.0416	0.87179	0.0363	1	1	1	1
Erwinia~phage~vB_EamM_ChrisDB	Caudovirales	Myoviridae	Machinavirus	539_4	Clustered	2	VC_539_4	2	0.0416	0.87179	0.0363	1	1	1	1
Erwinia~phage~vB_EamM_Deimos-Minion	Caudovirales	Myoviridae	Agrican357virus	540_0	Clustered	6	VC_540_0	6	0.4559	1	0.4559	2	1	1	1
Erwinia~phage~vB_EamM_Desertfox	Caudovirales	Myoviridae	Agricanvirus	540_0	Clustered	6	VC_540_0	6	0.4559	1	0.4559	2	1	1	1
Erwinia~phage~vB_EamM_EarlPhillipIV	Caudovirales	Myoviridae	Derbicusvirus	539_0	Clustered	4	VC_539_0	4	0.1345	0.999204	0.1344	1	1	1	1
Erwinia~phage~vB_EamM_Huxley	Caudovirales	Myoviridae	Machinavirus	539_3	Clustered	2	VC_539_3	2	0.0415	0.87179	0.0362	1	1	1	1
Erwinia~phage~vB_EamM_Kwan	Caudovirales	Myoviridae	Unassigned	539_1	Clustered	2	VC_539_1	2	0.0417	0.881452	0.0367	2	1	1	1
Erwinia~phage~vB_EamM_Phobos	Caudovirales	Myoviridae	Derbicusvirus	539_0	Clustered	4	VC_539_0	4	0.1345	0.999204	0.1344	1	1	1	1
Erwinia~phage~vB_EamM_RAY	Caudovirales	Myoviridae	Agrican357virus	540_0	Clustered	6	VC_540_0	6	0.4559	1	0.4559	2	1	1	1
Erwinia~phage~vB_EamM_RisingSun	Caudovirales	Myoviridae	Risingsunvirus	538_1	Clustered	2	VC_538_1	2	0.0607	0.954167	0.058	2	1	1	1
Erwinia~phage~vB_EamM_Simmy50	Caudovirales	Myoviridae	Agrican357virus	540_0	Clustered	6	VC_540_0	6	0.4559	1	0.4559	2	1	1	1
Erwinia~phage~vB_EamM_Special~G	Caudovirales	Myoviridae	Agrican357virus	540_0	Clustered	6	VC_540_0	6	0.4559	1	0.4559	2	1	1	1
Erwinia~phage~vB_EamM_Y3	Caudovirales	Myoviridae	Sasquatchvirus	560_1	Clustered	3	VC_560_1	3	0.1875	0.995271	0.1866	2	1	1	1
Erwinia~phage~vB_EamM_Yoloswag	Caudovirales	Myoviridae	Yoloswagvirus	560_2	Clustered/Singleton	1	VC_560_2	1	0	1	0	1	1	1	1
Erwinia~phage~vB_EamP-L1	Caudovirales	Autographiviridae	Elunavirus	424_0	Clustered	59	VC_424_0	59	0.7461	1	0.7461	11	2	1	1
Erwinia~phage~vB_EamP-S2	Caudovirales	Autographiviridae	Eracentumvirus	437_0	Clustered	23	VC_437_0	23	0.7035	1	0.7035	7	2	1	1
Erwinia~phage~vB_EamP-S6	Caudovirales	Podoviridae	Unassigned	6_0	Clustered	22	VC_6_0	22	0.501	1	0.501	7	2	2	0.7792
Erwinia~phage~vB_EamP_Frozen	Caudovirales	Podoviridae	Ea92virus	6_0	Clustered	22	VC_6_0	22	0.501	1	0.501	7	2	2	0.7792
Erwinia~phage~vB_EhrS_49	Caudovirales	Siphoviridae	Feofaniavirus	109_0	Clustered	2	VC_109_0	2	0.0736	0.955362	0.0703	1	1	1	1
Erwinia~phage~vB_EhrS_59	Caudovirales	Siphoviridae	Feofaniavirus	109_0	Clustered	2	VC_109_0	2	0.0736	0.955362	0.0703	1	1	1	1
Escherichia~Stx1~converting~phage	Caudovirales	Podoviridae	Traversvirus	390_0	Clustered	2	VC_390_0	2	0.052	0.955888	0.0497	2	1	1	1
Escherichia~coli~O157~typing~phage~3	Caudovirales	Myoviridae	Mosigvirus	48_0	Clustered	15	VC_48_0	15	0.1072	1	0.1072	3	2	2	1
Escherichia~coli~O157~typing~phage~6	Caudovirales	Myoviridae	Mosigvirus	48_0	Clustered	15	VC_48_0	15	0.1072	1	0.1072	3	2	2	1
Escherichia~phage~121Q	Caudovirales	Myoviridae	Asteriusvirus	127_4	Clustered	2	VC_127_4	2	0.0675	0.92798	0.0626	1	1	1	1
Escherichia~phage~172-1	Caudovirales	Podoviridae	Phieco32virus	97_0	Clustered	6	VC_97_0	6	0.6385	1	0.6385	1	1	1	1
Escherichia~phage~186	Caudovirales	Myoviridae	P2virus	119_0	Clustered	58	VC_119_0	58	0.8362	1	0.8362	15	2	2	1
Escherichia~phage~4MG	Caudovirales	Myoviridae	Se1virus	84_5	Clustered	2	VC_84_5	2	0.027	0.918307	0.0248	1	1	1	1
Escherichia~phage~64795_ec1	Caudovirales	Autographiviridae	Teseptimavirus	424_0	Clustered	59	VC_424_0	59	0.7461	1	0.7461	11	2	1	1
Escherichia~phage~933W	Caudovirales	Podoviridae	Nona33virus	390_1	Clustered	17	VC_390_1	17	0.5883	1	0.5883	6	2	2	0.8456
Escherichia~phage~ADB-2	Caudovirales	Siphoviridae	T1virus	419_0	Clustered	21	VC_419_0	21	0.3529	1	0.3529	6	2	1	0.9476
Escherichia~phage~APCEc01	Caudovirales	Myoviridae	Mosigvirus	48_0	Clustered	15	VC_48_0	15	0.1072	1	0.1072	3	2	2	1
Escherichia~phage~APCEc03	Caudovirales	Demerecviridae	Tequintavirus	103_1	Clustered	25	VC_103_1	25	0.3873	1	0.3873	2	2	1	1
Escherichia~phage~APECc02	Caudovirales	Myoviridae	Vequintavirus	84_0	Clustered	8	VC_84_0	8	0.2854	1	0.2854	2	1	1	1
Escherichia~phage~AR1	Caudovirales	Myoviridae	T4virus	48_6	Clustered	32	VC_48_6	32	0.3064	1	0.3064	3	1	1	0.9839
Escherichia~phage~Av-05	Caudovirales	Myoviridae	Avunavirus	84_6	Clustered/Singleton	1	VC_84_6	1	0	1	0	1	1	1	1
Escherichia~phage~Bp4	Caudovirales	Podoviridae	G7cvirus	6_0	Clustered	22	VC_6_0	22	0.501	1	0.501	7	2	2	0.7792
Escherichia~phage~C130_2	Caudovirales	Podoviridae	Giessenvirus	335_0	Clustered	7	VC_335_0	7	0.6613	1	0.6613	5	3	2	1
Escherichia~phage~C5	Caudovirales	Autographiviridae	Teseptimavirus	424_0	Clustered	59	VC_424_0	59	0.7461	1	0.7461	11	2	1	1
Escherichia~phage~CICC~80001	Caudovirales	Autographiviridae	Teseptimavirus	424_0	Clustered	59	VC_424_0	59	0.7461	1	0.7461	11	2	1	1
Escherichia~phage~D108	Caudovirales	Myoviridae	Muvirus	384_0	Clustered	3	VC_384_0	3	0.6037	0.998282	0.6027	1	1	1	1
Escherichia~phage~EC1-UPM	Caudovirales	Podoviridae	G7cvirus	6_0	Clustered	22	VC_6_0	22	0.501	1	0.501	7	2	2	0.7792
Escherichia~phage~EC6	Caudovirales	Myoviridae	Felixo1virus	24_0	Clustered	35	VC_24_0	35	0.8833	1	0.8833	5	2	2	0.9933
Escherichia~phage~ECA2	Caudovirales	Autographiviridae	Teetrevirus	424_0	Clustered	59	VC_424_0	59	0.7461	1	0.7461	11	2	1	1
Escherichia~phage~ECBP1	Caudovirales	Podoviridae	G7cvirus	6_0	Clustered	22	VC_6_0	22	0.501	1	0.501	7	2	2	0.7792
Escherichia~phage~ECBP2	Caudovirales	Podoviridae	Phieco32virus	97_0	Clustered	6	VC_97_0	6	0.6385	1	0.6385	1	1	1	1
Escherichia~phage~ECD7	Caudovirales	Myoviridae	Krischvirus	50_0	Clustered	5	VC_50_0	5	0.0891	1	0.0891	2	1	1	1
Escherichia~phage~ECML-134	Caudovirales	Myoviridae	T4virus	48_6	Clustered	32	VC_48_6	32	0.3064	1	0.3064	3	1	1	0.9839
Escherichia~phage~ECML-4	Caudovirales	Ackermannviridae	Vi1virus	37_1	Clustered	37	VC_37_1	37	0.4148	1	0.4148	3	1	1	1
Escherichia~phage~EG1	Caudovirales	Autographiviridae	Teseptimavirus	424_0	Clustered	59	VC_424_0	59	0.7461	1	0.7461	11	2	1	1
Escherichia~phage~EK99P-1	Caudovirales	Siphoviridae	Hk578virus	548_0	Clustered	10	VC_548_0	10	0.7731	1	0.7731	2	1	1	1
Escherichia~phage~EP75	Caudovirales	Ackermannviridae	Kuttervirus	37_1	Clustered	37	VC_37_1	37	0.4148	1	0.4148	3	1	1	1
Escherichia~phage~ESCO13	Caudovirales	Myoviridae	Phapecoctavirus	94_0	Clustered	6	VC_94_0	6	0.301	1	0.301	2	2	2	1
Escherichia~phage~ESCO5	Caudovirales	Myoviridae	Phapecoctavirus	94_0	Clustered	6	VC_94_0	6	0.301	1	0.301	2	2	2	1
Escherichia~phage~Ebrios	Caudovirales	Autographiviridae	Teseptimavirus	424_0	Clustered	59	VC_424_0	59	0.7461	1	0.7461	11	2	1	1
Escherichia~phage~Eco_BIFF	Caudovirales	Drexlerviridae	Tunavirus	419_0	Clustered	21	VC_419_0	21	0.3529	1	0.3529	6	2	1	0.9476
Escherichia~phage~Envy	Caudovirales	Siphoviridae	Dhillonvirus	548_0	Clustered	10	VC_548_0	10	0.7731	1	0.7731	2	1	1	1
Escherichia~phage~FEC14	Caudovirales	Ackermannviridae	Kuttervirus	37_1	Clustered	37	VC_37_1	37	0.4148	1	0.4148	3	1	1	1
Escherichia~phage~FFH2	Caudovirales	Myoviridae	V5virus	84_0	Clustered	8	VC_84_0	8	0.2854	1	0.2854	2	1	1	1
Escherichia~phage~FV3	Caudovirales	Myoviridae	V5virus	84_0	Clustered	8	VC_84_0	8	0.2854	1	0.2854	2	1	1	1
Escherichia~phage~Gluttony	Caudovirales	Siphoviridae	Dhillonvirus	548_0	Clustered	10	VC_548_0	10	0.7731	1	0.7731	2	1	1	1
Escherichia~phage~Gostya9	Caudovirales	Demerecviridae	Tequintavirus	103_1	Clustered	25	VC_103_1	25	0.3873	1	0.3873	2	2	1	1
Escherichia~phage~HK446	Caudovirales	Siphoviridae	Hk97virus	337_0	Clustered	13	VC_337_0	13	0.3116	1	0.3116	2	1	1	1
Escherichia~phage~HK542	Caudovirales	Siphoviridae	Hk97virus	337_0	Clustered	13	VC_337_0	13	0.3116	1	0.3116	2	1	1	1
Escherichia~phage~HK544	Caudovirales	Siphoviridae	Hk97virus	337_0	Clustered	13	VC_337_0	13	0.3116	1	0.3116	2	1	1	1
Escherichia~phage~HK578	Caudovirales	Siphoviridae	Hk578virus	548_0	Clustered	10	VC_548_0	10	0.7731	1	0.7731	2	1	1	1
Escherichia~phage~HK633	Caudovirales	Siphoviridae	Hk97virus	337_0	Clustered	13	VC_337_0	13	0.3116	1	0.3116	2	1	1	1
Escherichia~phage~HK75	Caudovirales	Siphoviridae	Hk97virus	337_0	Clustered	13	VC_337_0	13	0.3116	1	0.3116	2	1	1	1
Escherichia~phage~HY01	Caudovirales	Myoviridae	T4virus	48_6	Clustered	32	VC_48_6	32	0.3064	1	0.3064	3	1	1	0.9839
Escherichia~phage~HY02	Caudovirales	Myoviridae	Felixo1virus	24_0	Clustered	35	VC_24_0	35	0.8833	1	0.8833	5	2	2	0.9933
Escherichia~phage~HY03	Caudovirales	Myoviridae	Tequatrovirus	48_6	Clustered	32	VC_48_6	32	0.3064	1	0.3064	3	1	1	0.9839
Escherichia~phage~HZ2R8	Caudovirales	Autographiviridae	Teseptimavirus	424_0	Clustered	59	VC_424_0	59	0.7461	1	0.7461	11	2	1	1
Escherichia~phage~HZP2	Caudovirales	Autographiviridae	Teseptimavirus	424_0	Clustered	59	VC_424_0	59	0.7461	1	0.7461	11	2	1	1
Escherichia~phage~ID21	Petitvirales	Microviridae	Alpha3microvirus	586_0	Clustered	11	VC_586_0	11	0.6925	1	0.6925	2	1	1	1
Escherichia~phage~ID32	Petitvirales	Microviridae	Alpha3microvirus	586_0	Clustered	11	VC_586_0	11	0.6925	1	0.6925	2	1	1	1
Escherichia~phage~ID62	Petitvirales	Microviridae	Alpha3microvirus	586_0	Clustered	11	VC_586_0	11	0.6925	1	0.6925	2	1	1	1
Escherichia~phage~IME11	Caudovirales	Podoviridae	G7cvirus	6_0	Clustered	22	VC_6_0	22	0.501	1	0.501	7	2	2	0.7792
Escherichia~phage~IMM-002	Caudovirales	Autographiviridae	Kayfunavirus	423_0	Clustered	19	VC_423_0	19	0.6028	1	0.6028	3	1	1	1
Escherichia~phage~JES2013	Caudovirales	Myoviridae	V5virus	84_0	Clustered	8	VC_84_0	8	0.2854	1	0.2854	2	1	1	1
Escherichia~phage~JH2	Caudovirales	Myoviridae	Felixo1virus	24_0	Clustered	35	VC_24_0	35	0.8833	1	0.8833	5	2	2	0.9933
Escherichia~phage~JMPW1	Caudovirales	Siphoviridae	T1virus	419_0	Clustered	21	VC_419_0	21	0.3529	1	0.3529	6	2	1	0.9476
Escherichia~phage~JMPW2	Caudovirales	Siphoviridae	T1virus	419_0	Clustered	21	VC_419_0	21	0.3529	1	0.3529	6	2	1	0.9476
Escherichia~phage~JS10	Caudovirales	Myoviridae	Js98virus	48_1	Clustered	8	VC_48_1	8	0.0583	1	0.0583	2	1	1	0.9643
Escherichia~phage~JS98	Caudovirales	Myoviridae	Js98virus	48_1	Clustered	8	VC_48_1	8	0.0583	1	0.0583	2	1	1	0.9643
Escherichia~phage~JSE	Caudovirales	Myoviridae	Rb49virus	50_0	Clustered	5	VC_50_0	5	0.0891	1	0.0891	2	1	1	1
Escherichia~phage~K1-dep(1)	Caudovirales	Siphoviridae	K1gvirus	360_0	Clustered	25	VC_360_0	25	0.8863	1	0.8863	6	2	2	1
Escherichia~phage~K1-dep(4)	Caudovirales	Siphoviridae	K1gvirus	360_0	Clustered	25	VC_360_0	25	0.8863	1	0.8863	6	2	2	1
Escherichia~phage~K1-ind(2)	Caudovirales	Siphoviridae	K1gvirus	360_0	Clustered	25	VC_360_0	25	0.8863	1	0.8863	6	2	2	1
Escherichia~phage~K1ind1	Caudovirales	Siphoviridae	K1gvirus	360_0	Clustered	25	VC_360_0	25	0.8863	1	0.8863	6	2	2	1
Escherichia~phage~K30	Caudovirales	Podoviridae	Kp32virus	428_0	Clustered	22	VC_428_0	22	0.7106	1	0.7106	2	2	1	1
Escherichia~phage~KBNP1711	Caudovirales	Podoviridae	Phieco32virus	97_0	Clustered	6	VC_97_0	6	0.6385	1	0.6385	1	1	1	1
Escherichia~phage~LL11	Caudovirales	Autographiviridae	Vectrevirus	437_0	Clustered	23	VC_437_0	23	0.7035	1	0.7035	7	2	1	1
Escherichia~phage~LL2	Caudovirales	Autographiviridae	Teetrevirus	424_0	Clustered	59	VC_424_0	59	0.7461	1	0.7461	11	2	1	1
Escherichia~phage~LL5	Caudovirales	Drexlerviridae	Tlsvirus	419_1	Clustered	14	VC_419_1	14	0.2402	1	0.2402	4	3	2	0.8791
Escherichia~phage~LM33_P1	Caudovirales	Autographiviridae	Kayfunavirus	423_0	Clustered	19	VC_423_0	19	0.6028	1	0.6028	3	1	1	1
Escherichia~phage~Lidtsur	Caudovirales	Autographiviridae	Bonnellvirus	92_0	Clustered	3	VC_92_0	3	0.1608	0.998481	0.1605	3	2	1	1
Escherichia~phage~Lw1	Caudovirales	Myoviridae	Unassigned	101_1	Clustered	12	VC_101_1	12	0.2666	1	0.2666	1	2	2	0.9697
Escherichia~phage~MX01	Caudovirales	Myoviridae	Dhakavirus	48_1	Clustered	8	VC_48_1	8	0.0583	1	0.0583	2	1	1	0.9643
Escherichia~phage~Mangalitsa	Caudovirales	Chaseviridae	Carltongylesvirus	107_0	Clustered	11	VC_107_0	11	0.8518	1	0.8518	5	2	1	1
Escherichia~phage~Min27	Caudovirales	Podoviridae	Nona33virus	390_1	Clustered	17	VC_390_1	17	0.5883	1	0.5883	6	2	2	0.8456
Escherichia~phage~Minorna	Caudovirales	Autographiviridae	Drulisvirus	543_0	Clustered	21	VC_543_0	21	0.7402	1	0.7402	3	2	1	1
Escherichia~phage~Mu	Caudovirales	Myoviridae	Muvirus	384_0	Clustered	3	VC_384_0	3	0.6037	0.998282	0.6027	1	1	1	1
Escherichia~phage~Murica	Caudovirales	Myoviridae	Vequintavirus	84_0	Clustered	8	VC_84_0	8	0.2854	1	0.2854	2	1	1	1
Escherichia~phage~N30	Caudovirales	Autographiviridae	Teseptimavirus	424_0	Clustered	59	VC_424_0	59	0.7461	1	0.7461	11	2	1	1
Escherichia~phage~NC28	Petitvirales	Microviridae	Alpha3microvirus	586_0	Clustered	11	VC_586_0	11	0.6925	1	0.6925	2	1	1	1
Escherichia~phage~NC29	Petitvirales	Microviridae	Alpha3microvirus	586_0	Clustered	11	VC_586_0	11	0.6925	1	0.6925	2	1	1	1
Escherichia~phage~NC35	Petitvirales	Microviridae	Alpha3microvirus	586_0	Clustered	11	VC_586_0	11	0.6925	1	0.6925	2	1	1	1
Escherichia~phage~NJ01	Caudovirales	Podoviridae	Phieco32virus	97_0	Clustered	6	VC_97_0	6	0.6385	1	0.6385	1	1	1	1
Escherichia~phage~OSYSP	Caudovirales	Demerecviridae	Tequintavirus	103_1	Clustered	25	VC_103_1	25	0.3873	1	0.3873	2	2	1	1
Escherichia~phage~P13374	Caudovirales	Podoviridae	Oslovirus	390_1	Clustered	17	VC_390_1	17	0.5883	1	0.5883	6	2	2	0.8456
Escherichia~phage~P483	Caudovirales	Autographiviridae	Berlinvirus	424_0	Clustered	59	VC_424_0	59	0.7461	1	0.7461	11	2	1	1
Escherichia~phage~P694	Caudovirales	Autographiviridae	Berlinvirus	424_0	Clustered	59	VC_424_0	59	0.7461	1	0.7461	11	2	1	1
Escherichia~phage~PA2	Caudovirales	Podoviridae	Tl2011virus	390_1	Clustered	17	VC_390_1	17	0.5883	1	0.5883	6	2	2	0.8456
Escherichia~phage~PA28	Caudovirales	Podoviridae	Nona33virus	390_1	Clustered	17	VC_390_1	17	0.5883	1	0.5883	6	2	2	0.8456
Escherichia~phage~PBECO4	Caudovirales	Myoviridae	Asteriusvirus	127_4	Clustered	2	VC_127_4	2	0.0675	0.92798	0.0626	1	1	1	1
Escherichia~phage~PE3-1	Caudovirales	Autographiviridae	Kayfunavirus	423_0	Clustered	19	VC_423_0	19	0.6028	1	0.6028	3	1	1	1
Escherichia~phage~PGT2	Caudovirales	Autographiviridae	Ermolevavirus	90_0	Clustered	25	VC_90_0	25	0.6318	1	0.6318	15	2	1	1
Escherichia~phage~PhaxI	Caudovirales	Ackermannviridae	Cba120virus	37_1	Clustered	37	VC_37_1	37	0.4148	1	0.4148	3	1	1	1
Escherichia~phage~Phi1	Caudovirales	Myoviridae	Rb49virus	50_0	Clustered	5	VC_50_0	5	0.0891	1	0.0891	2	1	1	1
Escherichia~phage~Pollock	Caudovirales	Podoviridae	Sp58virus	10_0	Clustered	5	VC_10_0	5	0.2243	1	0.2243	2	1	1	1
Escherichia~phage~QL01	Caudovirales	Myoviridae	Js98virus	48_1	Clustered	8	VC_48_1	8	0.0583	1	0.0583	2	1	1	0.9643
Escherichia~phage~RB3	Caudovirales	Myoviridae	T4virus	48_6	Clustered	32	VC_48_6	32	0.3064	1	0.3064	3	1	1	0.9839
Escherichia~phage~RB49	Caudovirales	Myoviridae	Rb49virus	50_0	Clustered	5	VC_50_0	5	0.0891	1	0.0891	2	1	1	1
Escherichia~phage~RB69	Caudovirales	Myoviridae	Rb69virus	48_0	Clustered	15	VC_48_0	15	0.1072	1	0.1072	3	2	2	1
Escherichia~phage~RCS47	Caudovirales	Myoviridae	Punavirus	617_0	Clustered	18	VC_617_0	18	0.6511	1	0.6511	3	2	2	0.9935
Escherichia~phage~SP15	Caudovirales	Demerecviridae	Tequintavirus	103_1	Clustered	25	VC_103_1	25	0.3873	1	0.3873	2	2	1	1
Escherichia~phage~SRT7	Caudovirales	Autographiviridae	Foetvirus	424_0	Clustered	59	VC_424_0	59	0.7461	1	0.7461	11	2	1	1
Escherichia~phage~SRT8	Caudovirales	Drexlerviridae	Sertoctavirus	419_0	Clustered	21	VC_419_0	21	0.3529	1	0.3529	6	2	1	0.9476
Escherichia~phage~ST0	Caudovirales	Myoviridae	Mosigvirus	48_0	Clustered	15	VC_48_0	15	0.1072	1	0.1072	3	2	2	1
Escherichia~phage~ST31	Caudovirales	Autographiviridae	Kayfunavirus	423_0	Clustered	19	VC_423_0	19	0.6028	1	0.6028	3	1	1	1
Escherichia~phage~ST32	Caudovirales	Chaseviridae	Carltongylesvirus	107_0	Clustered	11	VC_107_0	11	0.8518	1	0.8518	5	2	1	1
Escherichia~phage~SUSP1	Caudovirales	Myoviridae	Suspvirus	24_0	Clustered	35	VC_24_0	35	0.8833	1	0.8833	5	2	2	0.9933
Escherichia~phage~SUSP2	Caudovirales	Myoviridae	Suspvirus	24_0	Clustered	35	VC_24_0	35	0.8833	1	0.8833	5	2	2	0.9933
Escherichia~phage~Skarpretter	Caudovirales	Podoviridae	Skarprettervirus	335_0	Clustered	7	VC_335_0	7	0.6613	1	0.6613	5	3	2	1
Escherichia~phage~Sortsne	Caudovirales	Podoviridae	Sortsnevirus	335_0	Clustered	7	VC_335_0	7	0.6613	1	0.6613	5	3	2	1
Escherichia~phage~St-1	Petitvirales	Microviridae	Alpha3microvirus	586_0	Clustered	11	VC_586_0	11	0.6925	1	0.6925	2	1	1	1
Escherichia~phage~Stx2~II	Caudovirales	Podoviridae	Nona33virus	390_0	Clustered	2	VC_390_0	2	0.052	0.955888	0.0497	2	1	1	1
Escherichia~phage~T7	Caudovirales	Podoviridae	T7virus	424_0	Clustered	59	VC_424_0	59	0.7461	1	0.7461	11	2	1	1
Escherichia~phage~TL-2011b	Caudovirales	Podoviridae	Uetakevirus	112_0	Clustered	9	VC_112_0	9	0.7165	1	0.7165	3	2	2	1
Escherichia~phage~TL-2011c	Caudovirales	Podoviridae	Tl2011virus	390_1	Clustered	17	VC_390_1	17	0.5883	1	0.5883	6	2	2	0.8456
Escherichia~phage~UFV-AREG1	Caudovirales	Myoviridae	Tequatrovirus	48_6	Clustered	32	VC_48_6	32	0.3064	1	0.3064	3	1	1	0.9839
Escherichia~phage~V18	Caudovirales	Myoviridae	Vequintavirus	84_0	Clustered	8	VC_84_0	8	0.2854	1	0.2854	2	1	1	1
Escherichia~phage~V5	Caudovirales	Myoviridae	V5virus	84_0	Clustered	8	VC_84_0	8	0.2854	1	0.2854	2	1	1	1
Escherichia~phage~VB_EcoS-Golestan	Caudovirales	Siphoviridae	Kagunavirus	360_0	Clustered	25	VC_360_0	25	0.8863	1	0.8863	6	2	2	1
Escherichia~phage~WA45	Petitvirales	Microviridae	Alpha3microvirus	586_0	Clustered	11	VC_586_0	11	0.6925	1	0.6925	2	1	1	1
Escherichia~phage~WG01	Caudovirales	Myoviridae	Dhakavirus	48_1	Clustered	8	VC_48_1	8	0.0583	1	0.0583	2	1	1	0.9643
Escherichia~phage~Wphi	Caudovirales	Myoviridae	P2virus	119_0	Clustered	58	VC_119_0	58	0.8362	1	0.8362	15	2	2	1
Escherichia~phage~YD-2008.s	Caudovirales	Siphoviridae	Hk578virus	548_0	Clustered	10	VC_548_0	10	0.7731	1	0.7731	2	1	1	1
Escherichia~phage~YZ1	Caudovirales	Autographiviridae	Kayfunavirus	423_0	Clustered	19	VC_423_0	19	0.6028	1	0.6028	3	1	1	1
Escherichia~phage~ZG49	Caudovirales	Autographiviridae	Kayfunavirus	423_0	Clustered	19	VC_423_0	19	0.6028	1	0.6028	3	1	1	1
Escherichia~phage~alpha3	Petitvirales	Microviridae	Alpha3microvirus	586_0	Clustered	11	VC_586_0	11	0.6925	1	0.6925	2	1	1	1
Escherichia~phage~flopper	Caudovirales	Chaseviridae	Carltongylesvirus	107_0	Clustered	11	VC_107_0	11	0.8518	1	0.8518	5	2	1	1
Escherichia~phage~fp01	Caudovirales	Demerecviridae	Tequintavirus	103_1	Clustered	25	VC_103_1	25	0.3873	1	0.3873	2	2	1	1
Escherichia~phage~ime09	Caudovirales	Myoviridae	T4virus	48_6	Clustered	32	VC_48_6	32	0.3064	1	0.3064	3	1	1	0.9839
Escherichia~phage~mEp234	Caudovirales	Siphoviridae	Hk97virus	337_0	Clustered	13	VC_337_0	13	0.3116	1	0.3116	2	1	1	1
Escherichia~phage~mEpX1	Caudovirales	Siphoviridae	Hk97virus	337_0	Clustered	13	VC_337_0	13	0.3116	1	0.3116	2	1	1	1
Escherichia~phage~mEpX2	Caudovirales	Siphoviridae	Hk97virus	337_0	Clustered	13	VC_337_0	13	0.3116	1	0.3116	2	1	1	1
Escherichia~phage~phAPEC8	Caudovirales	Myoviridae	Phapecoctavirus	94_0	Clustered	6	VC_94_0	6	0.301	1	0.301	2	2	2	1
Escherichia~phage~phi191	Caudovirales	Podoviridae	Tl2011virus	390_1	Clustered	17	VC_390_1	17	0.5883	1	0.5883	6	2	2	0.8456
Escherichia~phage~phiK	Petitvirales	Microviridae	Alpha3microvirus	586_0	Clustered	11	VC_586_0	11	0.6925	1	0.6925	2	1	1	1
Escherichia~phage~phiKT	Caudovirales	Autographiviridae	Ermolevavirus	90_0	Clustered	25	VC_90_0	25	0.6318	1	0.6318	15	2	1	1
Escherichia~phage~phiLLS	Caudovirales	Demerecviridae	Tequintavirus	103_1	Clustered	25	VC_103_1	25	0.3873	1	0.3873	2	2	1	1
Escherichia~phage~phiV10	Caudovirales	Podoviridae	Epsilon15virus	112_0	Clustered	9	VC_112_0	9	0.7165	1	0.7165	3	2	2	1
Escherichia~phage~pro147	Caudovirales	Myoviridae	Peduovirus	119_0	Clustered	58	VC_119_0	58	0.8362	1	0.8362	15	2	2	1
Escherichia~phage~pro483	Caudovirales	Myoviridae	Peduovirus	119_0	Clustered	58	VC_119_0	58	0.8362	1	0.8362	15	2	2	1
Escherichia~phage~saus132	Caudovirales	Demerecviridae	Epseptimavirus	103_2	Clustered	32	VC_103_2	32	0.4816	1	0.4816	2	2	1	0.998
Escherichia~phage~slur02	Caudovirales	Myoviridae	Tequatrovirus	48_6	Clustered	32	VC_48_6	32	0.3064	1	0.3064	3	1	1	0.9839
Escherichia~phage~slur03	Caudovirales	Myoviridae	Tequatrovirus	48_6	Clustered	32	VC_48_6	32	0.3064	1	0.3064	3	1	1	0.9839
Escherichia~phage~slur04	Caudovirales	Myoviridae	Tequatrovirus	48_6	Clustered	32	VC_48_6	32	0.3064	1	0.3064	3	1	1	0.9839
Escherichia~phage~slur05	Caudovirales	Siphoviridae	Dhillonvirus	548_0	Clustered	10	VC_548_0	10	0.7731	1	0.7731	2	1	1	1
Escherichia~phage~slur07	Caudovirales	Myoviridae	Tequatrovirus	48_6	Clustered	32	VC_48_6	32	0.3064	1	0.3064	3	1	1	0.9839
Escherichia~phage~slur09	Caudovirales	Siphoviridae	T5virus	103_1	Clustered	25	VC_103_1	25	0.3873	1	0.3873	2	2	1	1
Escherichia~phage~slur14	Caudovirales	Myoviridae	Tequatrovirus	48_6	Clustered	32	VC_48_6	32	0.3064	1	0.3064	3	1	1	0.9839
Escherichia~phage~slur16	Caudovirales	Myoviridae	Vequintavirus	84_0	Clustered	8	VC_84_0	8	0.2854	1	0.2854	2	1	1	1
Escherichia~phage~vB_EcoM-12474III	Caudovirales	Myoviridae	Peduovirus	119_0	Clustered	58	VC_119_0	58	0.8362	1	0.8362	15	2	2	1
Escherichia~phage~vB_EcoM-UFV13	Caudovirales	Myoviridae	Tequatrovirus	48_6	Clustered	32	VC_48_6	32	0.3064	1	0.3064	3	1	1	0.9839
Escherichia~phage~vB_EcoM-VpaE1	Caudovirales	Myoviridae	Felixo1virus	24_0	Clustered	35	VC_24_0	35	0.8833	1	0.8833	5	2	2	0.9933
Escherichia~phage~vB_EcoM-ep3	Caudovirales	Myoviridae	Cvm10virus	111_0	Clustered	5	VC_111_0	5	0.3437	1	0.3437	2	1	1	1
Escherichia~phage~vB_EcoM_112	Caudovirales	Myoviridae	T4virus	48_6	Clustered	32	VC_48_6	32	0.3064	1	0.3064	3	1	1	0.9839
Escherichia~phage~vB_EcoM_ACG-C40	Caudovirales	Myoviridae	T4virus	48_6	Clustered	32	VC_48_6	32	0.3064	1	0.3064	3	1	1	0.9839
Escherichia~phage~vB_EcoM_AYO145A	Caudovirales	Myoviridae	Felixo1virus	24_0	Clustered	35	VC_24_0	35	0.8833	1	0.8833	5	2	2	0.9933
Escherichia~phage~vB_EcoM_Alf5	Caudovirales	Myoviridae	Felixounavirus	24_0	Clustered	35	VC_24_0	35	0.8833	1	0.8833	5	2	2	0.9933
Escherichia~phage~vB_EcoM_ECO1230-10	Caudovirales	Myoviridae	Cvm10virus	111_0	Clustered	5	VC_111_0	5	0.3437	1	0.3437	2	1	1	1
Escherichia~phage~vB_EcoM_ECOO78	Caudovirales	Myoviridae	Jilinvirus	111_0	Clustered	5	VC_111_0	5	0.3437	1	0.3437	2	1	1	1
Escherichia~phage~vB_EcoM_JS09	Caudovirales	Myoviridae	Rb69virus	48_0	Clustered	15	VC_48_0	15	0.1072	1	0.1072	3	2	2	1
Escherichia~phage~vB_EcoM_KWBSE43-6	Caudovirales	Ackermannviridae	Taipeivirus	37_0	Clustered	8	VC_37_0	8	0.0604	0.99299	0.06	1	1	1	0.9643
Escherichia~phage~vB_EcoM_PhAPEC2	Caudovirales	Myoviridae	Mosigvirus	48_0	Clustered	15	VC_48_0	15	0.1072	1	0.1072	3	2	2	1
Escherichia~phage~vB_EcoM_Schickermooser	Caudovirales	Myoviridae	Phapecoctavirus	94_0	Clustered	6	VC_94_0	6	0.301	1	0.301	2	2	2	1
Escherichia~phage~vB_EcoM_VR20	Caudovirales	Myoviridae	Sp18virus	48_13	Clustered	5	VC_48_13	5	0.033	1	0.033	1	1	1	1
Escherichia~phage~vB_EcoM_VR25	Caudovirales	Myoviridae	Sp18virus	48_13	Clustered	5	VC_48_13	5	0.033	1	0.033	1	1	1	1
Escherichia~phage~vB_EcoM_VR26	Caudovirales	Myoviridae	Sp18virus	48_13	Clustered	5	VC_48_13	5	0.033	1	0.033	1	1	1	1
Escherichia~phage~vB_EcoM_VR7	Caudovirales	Myoviridae	Sp18virus	48_13	Clustered	5	VC_48_13	5	0.033	1	0.033	1	1	1	1
Escherichia~phage~vB_EcoP-Ro45lw	Caudovirales	Autographiviridae	Kayfunavirus	423_0	Clustered	19	VC_423_0	19	0.6028	1	0.6028	3	1	1	1
Escherichia~phage~vB_EcoP_24B	Caudovirales	Podoviridae	Nona33virus	390_1	Clustered	17	VC_390_1	17	0.5883	1	0.5883	6	2	2	0.8456
Escherichia~phage~vB_EcoP_B	Caudovirales	Autographiviridae	Vectrevirus	437_0	Clustered	23	VC_437_0	23	0.7035	1	0.7035	7	2	1	1
Escherichia~phage~vB_EcoP_C	Caudovirales	Autographiviridae	Vectrevirus	437_0	Clustered	23	VC_437_0	23	0.7035	1	0.7035	7	2	1	1
Escherichia~phage~vB_EcoP_F	Caudovirales	Autographiviridae	Kayfunavirus	423_0	Clustered	19	VC_423_0	19	0.6028	1	0.6028	3	1	1	1
Escherichia~phage~vB_EcoP_G7C	Caudovirales	Podoviridae	G7cvirus	6_0	Clustered	22	VC_6_0	22	0.501	1	0.501	7	2	2	0.7792
Escherichia~phage~vB_EcoP_GA2A	Caudovirales	Autographiviridae	Kayfunavirus	423_0	Clustered	19	VC_423_0	19	0.6028	1	0.6028	3	1	1	1
Escherichia~phage~vB_EcoP_K	Caudovirales	Autographiviridae	Vectrevirus	437_0	Clustered	23	VC_437_0	23	0.7035	1	0.7035	7	2	1	1
Escherichia~phage~vB_EcoP_PhAPEC5	Caudovirales	Podoviridae	G7cvirus	6_0	Clustered	22	VC_6_0	22	0.501	1	0.501	7	2	2	0.7792
Escherichia~phage~vB_EcoP_PhAPEC7	Caudovirales	Podoviridae	G7cvirus	6_0	Clustered	22	VC_6_0	22	0.501	1	0.501	7	2	2	0.7792
Escherichia~phage~vB_EcoP_S523	Caudovirales	Autographiviridae	Berlinvirus	424_0	Clustered	59	VC_424_0	59	0.7461	1	0.7461	11	2	1	1
Escherichia~phage~vB_EcoP_SU10	Caudovirales	Podoviridae	Phieco32virus	97_0	Clustered	6	VC_97_0	6	0.6385	1	0.6385	1	1	1	1
Escherichia~phage~vB_EcoS-95	Caudovirales	Drexlerviridae	Warwickvirus	419_1	Clustered	14	VC_419_1	14	0.2402	1	0.2402	4	3	2	0.8791
Escherichia~phage~vB_EcoS_AKFV33	Caudovirales	Siphoviridae	T5virus	103_1	Clustered	25	VC_103_1	25	0.3873	1	0.3873	2	2	1	1
Escherichia~phage~vB_EcoS_FFH_1	Caudovirales	Siphoviridae	T5virus	103_1	Clustered	25	VC_103_1	25	0.3873	1	0.3873	2	2	1	1
Escherichia~phage~vB_EcoS_HdH2	Caudovirales	Demerecviridae	Tequintavirus	103_1	Clustered	25	VC_103_1	25	0.3873	1	0.3873	2	2	1	1
Escherichia~phage~vB_EcoS_SH2	Caudovirales	Drexlerviridae	Tunavirus	419_0	Clustered	21	VC_419_0	21	0.3529	1	0.3529	6	2	1	0.9476
Escherichia~phage~vB_Eco_swan01	Caudovirales	Drexlerviridae	Warwickvirus	419_1	Clustered	14	VC_419_1	14	0.2402	1	0.2402	4	3	2	0.8791
Escherichia~phage~vb_EcoM-VR5	Caudovirales	Myoviridae	Js98virus	48_1	Clustered	8	VC_48_1	8	0.0583	1	0.0583	2	1	1	0.9643
Escherichia~phage~wV7	Caudovirales	Myoviridae	Tequatrovirus	48_6	Clustered	32	VC_48_6	32	0.3064	1	0.3064	3	1	1	0.9839
Escherichia~phage~wV8	Caudovirales	Myoviridae	Felixo1virus	24_0	Clustered	35	VC_24_0	35	0.8833	1	0.8833	5	2	2	0.9933
Escherichia~typing~phage~1	Caudovirales	Myoviridae	Felixo1virus	24_0	Clustered	35	VC_24_0	35	0.8833	1	0.8833	5	2	2	0.9933
Escherichia~virus~AAPEc6	Caudovirales	Autographiviridae	Vectrevirus	437_0	Clustered	23	VC_437_0	23	0.7035	1	0.7035	7	2	1	1
Escherichia~virus~BZ13	Levivirales	Leviviridae	Levivirus	590_0	Clustered	2	VC_590_0	2	1	1	1	1	1	1	1
Escherichia~virus~CBA120	Caudovirales	Ackermannviridae	Cba120virus	37_1	Clustered	37	VC_37_1	37	0.4148	1	0.4148	3	1	1	1
Escherichia~virus~DT57C	Caudovirales	Siphoviridae	T5virus	103_1	Clustered	25	VC_103_1	25	0.3873	1	0.3873	2	2	1	1
Escherichia~virus~EPS7	Caudovirales	Siphoviridae	T5virus	103_2	Clustered	32	VC_103_2	32	0.4816	1	0.4816	2	2	1	0.998
Escherichia~virus~FI	Levivirales	Leviviridae	Allolevivirus	593_0	Clustered	3	VC_593_0	3	1	0	0	1	1	1	1
Escherichia~virus~HK022	Caudovirales	Siphoviridae	Hk97virus	337_0	Clustered	13	VC_337_0	13	0.3116	1	0.3116	2	1	1	1
Escherichia~virus~HK97	Caudovirales	Siphoviridae	Hk97virus	337_0	Clustered	13	VC_337_0	13	0.3116	1	0.3116	2	1	1	1
Escherichia~virus~I22	Tubulavirales	Inoviridae	Lineavirus	588_0	Clustered/Singleton	1	VC_588_0	1	0	1	0	1	1	1	1
Escherichia~virus~JL1	Caudovirales	Siphoviridae	Hk578virus	548_0	Clustered	10	VC_548_0	10	0.7731	1	0.7731	2	1	1	1
Escherichia~virus~K1-5	Caudovirales	Podoviridae	Sp6virus	437_0	Clustered	23	VC_437_0	23	0.7035	1	0.7035	7	2	1	1
Escherichia~virus~K1E	Caudovirales	Podoviridae	Sp6virus	437_0	Clustered	23	VC_437_0	23	0.7035	1	0.7035	7	2	1	1
Escherichia~virus~M13	Tubulavirales	Inoviridae	Inovirus	589_0	Clustered	3	VC_589_0	3	0.6877	0.963901	0.6629	2	1	1	1
Escherichia~virus~N4	Caudovirales	Podoviridae	N4virus	6_0	Clustered	22	VC_6_0	22	0.501	1	0.501	7	2	2	0.7792
Escherichia~virus~P1	Caudovirales	Myoviridae	P1virus	617_0	Clustered	18	VC_617_0	18	0.6511	1	0.6511	3	2	2	0.9935
Escherichia~virus~P2	Caudovirales	Myoviridae	P2virus	119_0	Clustered	58	VC_119_0	58	0.8362	1	0.8362	15	2	2	1
Escherichia~virus~Qbeta	Levivirales	Leviviridae	Allolevivirus	593_0	Clustered	3	VC_593_0	3	1	0	0	1	1	1	1
Escherichia~virus~RB14	Caudovirales	Myoviridae	T4virus	48_6	Clustered	32	VC_48_6	32	0.3064	1	0.3064	3	1	1	0.9839
Escherichia~virus~RB16	Caudovirales	Myoviridae	Unassigned	101_1	Clustered	12	VC_101_1	12	0.2666	1	0.2666	1	2	2	0.9697
Escherichia~virus~RB32	Caudovirales	Myoviridae	Unassigned	48_6	Clustered	32	VC_48_6	32	0.3064	1	0.3064	3	1	1	0.9839
Escherichia~virus~RB43	Caudovirales	Myoviridae	Unassigned	101_1	Clustered	12	VC_101_1	12	0.2666	1	0.2666	1	2	2	0.9697
Escherichia~virus~SSL2009a	Caudovirales	Siphoviridae	Hk578virus	548_0	Clustered	10	VC_548_0	10	0.7731	1	0.7731	2	1	1	1
Escherichia~virus~T1	Caudovirales	Siphoviridae	T1virus	419_0	Clustered	21	VC_419_0	21	0.3529	1	0.3529	6	2	1	0.9476
Escherichia~virus~T4	Caudovirales	Myoviridae	T4virus	48_6	Clustered	32	VC_48_6	32	0.3064	1	0.3064	3	1	1	0.9839
Escherichia~virus~T5	Caudovirales	Siphoviridae	T5virus	103_1	Clustered	25	VC_103_1	25	0.3873	1	0.3873	2	2	1	1
Escherichia~virus~TLS	Caudovirales	Siphoviridae	Tlsvirus	419_1	Clustered	14	VC_419_1	14	0.2402	1	0.2402	4	3	2	0.8791
Escherichia~virus~VEc3	Caudovirales	Autographiviridae	Vectrevirus	437_0	Clustered	23	VC_437_0	23	0.7035	1	0.7035	7	2	1	1
Escherichia~virus~VEc33	Caudovirales	Demerecviridae	Tequintavirus	103_1	Clustered	25	VC_103_1	25	0.3873	1	0.3873	2	2	1	1
Escherichia~virus~Vec13	Caudovirales	Autographiviridae	Kayfunavirus	423_0	Clustered	19	VC_423_0	19	0.6028	1	0.6028	3	1	1	1
Escherichia~virus~mutPK1A2	Caudovirales	Autographiviridae	Vectrevirus	437_0	Clustered	23	VC_437_0	23	0.7035	1	0.7035	7	2	1	1
Escherichia~virus~phiEco32	Caudovirales	Podoviridae	Phieco32virus	97_0	Clustered	6	VC_97_0	6	0.6385	1	0.6385	1	1	1	1
Faecalibacterium~phage~FP_Brigit	Caudovirales	Myoviridae	Brigitvirus	189_1	Clustered	26	VC_189_1	26	0.3716	1	0.3716	2	2	2	1
Faecalibacterium~phage~FP_Epona	Caudovirales	Myoviridae	Eponavirus	630_0	Clustered	19	VC_630_0	19	0.4483	1	0.4483	2	2	2	0.8713
Faecalibacterium~phage~FP_Lagaffe	Caudovirales	Myoviridae	Lagaffevirus	190_0	Clustered	26	VC_190_0	26	0.6747	1	0.6747	2	2	2	0.8338
Faecalibacterium~phage~FP_Lugh	Caudovirales	Siphoviridae	Lughvirus	642_0	Clustered	3	VC_642_0	3	0.0672	0.997469	0.067	2	2	2	1
Faecalibacterium~phage~FP_Mushu	Caudovirales	Myoviridae	Mushuvirus	254_0	Clustered	43	VC_254_0	43	0.8474	1	0.8474	2	2	2	1
Faecalibacterium~phage~FP_Taranis	Caudovirales	Myoviridae	Taranisvirus	640_0	Clustered	2	VC_640_0	2	0.1524	0.956472	0.1458	2	2	2	1
Faecalibacterium~phage~FP_Toutatis	Caudovirales	Myoviridae	Toutatisvirus	632_0	Clustered	14	VC_632_0	14	0.3972	1	0.3972	2	2	2	0.8242
Faecalibacterium~phage~FP_oengus	Caudovirales	Siphoviridae	Oengusvirus	187_0	Clustered	9	VC_187_0	9	0.3204	1	0.3204	2	2	2	1
Feng_Q_2015_NC_ERR688506.NODE_1464_21827	Unassigned	Unassigned	Unassigned	675_0	Clustered	2	VC_675_0	2	0.017	0.95622	0.0163	1	1	1	1
Feng_Q_2015_NC_ERR688517.NODE_3_335063	Unassigned	Unassigned	Unassigned	577_4	Clustered	5	VC_577_4	5	0.0188	0.999919	0.0188	1	1	1	0.7
Feng_Q_2015_NC_ERR688517.NODE_40_158718	Unassigned	Unassigned	Unassigned	580_1	Clustered	38	VC_580_1	38	0.4731	1	0.4731	1	1	1	0.7568
Feng_Q_2015_NC_ERR688525.NODE_14_257992	Unassigned	Unassigned	Unassigned	578_0	Clustered	5	VC_578_0	5	0.0299	1	0.0299	1	1	1	1
Feng_Q_2015_NC_ERR688525.NODE_40_157640	Unassigned	Unassigned	Unassigned	574_0	Clustered	35	VC_574_0	35	0.6283	1	0.6283	1	1	1	0.9008
Feng_Q_2015_NC_ERR688525.NODE_47_150203	Unassigned	Unassigned	Unassigned	580_2	Clustered	2	VC_580_2	2	0.0099	0.947191	0.0094	1	1	1	1
Feng_Q_2015_NC_ERR688525.NODE_79_122797	Unassigned	Unassigned	Unassigned	581_3	Clustered	17	VC_581_3	17	0.172	1	0.172	1	1	1	0.9559
Feng_Q_2015_NC_ERR688540.NODE_1021_17892	Unassigned	Unassigned	Unassigned	687_0	Clustered	7	VC_687_0	7	0.1878	0.999987	0.1878	1	1	1	1
Feng_Q_2015_NC_ERR688547.NODE_109_79908	Unassigned	Unassigned	Unassigned	582_6	Clustered	7	VC_582_6	7	0.0707	0.999957	0.0706	1	1	1	0.7619
Feng_Q_2015_NC_ERR688547.NODE_133_70863	Unassigned	Unassigned	Unassigned	577_12	Clustered	32	VC_577_12	32	0.2168	1	0.2168	1	1	1	0.8649
Feng_Q_2015_NC_ERR688547.NODE_88_90759	Unassigned	Unassigned	Unassigned	580_1	Clustered	38	VC_580_1	38	0.4731	1	0.4731	1	1	1	0.7568
Feng_Q_2015_NC_ERR688553.NODE_116_77095	Unassigned	Unassigned	Unassigned	580_0	Clustered	12	VC_580_0	12	0.1028	1	0.1028	1	1	1	0.7879
Feng_Q_2015_NC_ERR688553.NODE_1530_15294	Unassigned	Unassigned	Unassigned	681_0	Clustered	11	VC_681_0	11	0.095	1	0.095	1	1	1	1
Feng_Q_2015_NC_ERR688555.NODE_16_180361	Unassigned	Unassigned	Unassigned	577_13	Clustered	26	VC_577_13	26	0.1496	1	0.1496	1	1	1	0.9908
Feng_Q_2015_NC_ERR688555.NODE_27_145559	Unassigned	Unassigned	Unassigned	575_9	Clustered	10	VC_575_9	10	0.0936	1	0.0936	1	1	1	0.8444
Feng_Q_2015_NC_ERR688555.NODE_95_78185	Unassigned	Unassigned	Unassigned	570_4	Clustered	17	VC_570_4	17	0.2774	1	0.2774	1	1	1	0.8897
Feng_Q_2015_NC_ERR688556.NODE_11_243924	Unassigned	Unassigned	Unassigned	577_14	Clustered	3	VC_577_14	3	0.0098	0.977006	0.0095	1	1	1	1
Feng_Q_2015_NC_ERR688558.NODE_36_162037	Unassigned	Unassigned	Unassigned	577_11	Clustered	4	VC_577_11	4	0.0267	0.999928	0.0267	1	1	1	1
Feng_Q_2015_NC_ERR688558.NODE_46_155326	Unassigned	Unassigned	Unassigned	581_3	Clustered	17	VC_581_3	17	0.172	1	0.172	1	1	1	0.9559
Feng_Q_2015_NC_ERR688558.NODE_8_356872	Unassigned	Unassigned	Unassigned	577_7	Clustered/Singleton	1	VC_577_7	1	0	1	0	1	1	1	1
Feng_Q_2015_NC_ERR688559.NODE_137_87077	Unassigned	Unassigned	Unassigned	578_1	Clustered	41	VC_578_1	41	0.4748	1	0.4748	1	1	1	0.8146
Feng_Q_2015_NC_ERR688559.NODE_255_57902	Unassigned	Unassigned	Unassigned	570_4	Clustered	17	VC_570_4	17	0.2774	1	0.2774	1	1	1	0.8897
Feng_Q_2015_NC_ERR688564.NODE_124_96826	Unassigned	Unassigned	Unassigned	579_0	Clustered	22	VC_579_0	22	0.374	1	0.374	1	1	1	0.9784
Feng_Q_2015_NC_ERR688564.NODE_1308_21004	Unassigned	Unassigned	Unassigned	683_0	Clustered	6	VC_683_0	6	0.0913	0.99957	0.0913	1	1	1	1
Feng_Q_2015_NC_ERR688564.NODE_132_95137	Unassigned	Unassigned	Unassigned	578_1	Clustered	41	VC_578_1	41	0.4748	1	0.4748	1	1	1	0.8146
Feng_Q_2015_NC_ERR688564.NODE_270_68917	Unassigned	Unassigned	Unassigned	581_4	Clustered	2	VC_581_4	2	0.01	0.919419	0.0092	1	1	1	1
Feng_Q_2015_NC_ERR688564.NODE_36_168274	Unassigned	Unassigned	Unassigned	575_6	Clustered	8	VC_575_6	8	0.0633	1	0.0633	1	1	1	0.8571
Feng_Q_2015_NC_ERR688567.NODE_103_94083	Unassigned	Unassigned	Unassigned	574_0	Clustered	35	VC_574_0	35	0.6283	1	0.6283	1	1	1	0.9008
Feng_Q_2015_NC_ERR688567.NODE_33_179828	Unassigned	Unassigned	Unassigned	575_4	Clustered/Singleton	1	VC_575_4	1	0	1	0	1	1	1	1
Feng_Q_2015_NC_ERR688567.NODE_49_144613	Unassigned	Unassigned	Unassigned	581_3	Clustered	17	VC_581_3	17	0.172	1	0.172	1	1	1	0.9559
Feng_Q_2015_NC_ERR688567.NODE_92_98026	Unassigned	Unassigned	Unassigned	579_0	Clustered	22	VC_579_0	22	0.374	1	0.374	1	1	1	0.9784
Feng_Q_2015_NC_ERR688567.NODE_96_97017	Unassigned	Unassigned	Unassigned	578_1	Clustered	41	VC_578_1	41	0.4748	1	0.4748	1	1	1	0.8146
Feng_Q_2015_NC_ERR688569.NODE_24_224744	Unassigned	Unassigned	Unassigned	577_13	Clustered	26	VC_577_13	26	0.1496	1	0.1496	1	1	1	0.9908
Feng_Q_2015_NC_ERR688569.NODE_34_181591	Unassigned	Unassigned	Unassigned	580_1	Clustered	38	VC_580_1	38	0.4731	1	0.4731	1	1	1	0.7568
Feng_Q_2015_NC_ERR688569.NODE_59_138225	Unassigned	Unassigned	Unassigned	575_5	Clustered	17	VC_575_5	17	0.1983	1	0.1983	1	1	1	0.9412
Feng_Q_2015_NC_ERR688569.NODE_65_130683	Unassigned	Unassigned	Unassigned	574_0	Clustered	35	VC_574_0	35	0.6283	1	0.6283	1	1	1	0.9008
Feng_Q_2015_NC_ERR688580.NODE_71_98157	Unassigned	Unassigned	Unassigned	577_2	Clustered	8	VC_577_2	8	0.0512	1	0.0512	1	1	1	1
Feng_Q_2015_NC_ERR688580.NODE_89_84760	Unassigned	Unassigned	Unassigned	574_0	Clustered	35	VC_574_0	35	0.6283	1	0.6283	1	1	1	0.9008
Feng_Q_2015_NC_ERR688586.NODE_6124_6133	Unassigned	Unassigned	Unassigned	682_0	Clustered	2	VC_682_0	2	0.0152	0.95611	0.0145	1	1	1	1
Feng_Q_2015_NC_ERR688586.NODE_82094_779	Unassigned	Unassigned	Unassigned	695_0	Clustered	3	VC_695_0	3	0.3904	0.95221	0.3718	1	1	1	1
Feng_Q_2015_NC_ERR688589.NODE_26_209350	Unassigned	Unassigned	Unassigned	575_8	Clustered	3	VC_575_8	3	0.0138	0.992345	0.0137	1	1	1	1
Feng_Q_2015_NC_ERR688589.NODE_37_178501	Unassigned	Unassigned	Unassigned	579_0	Clustered	22	VC_579_0	22	0.374	1	0.374	1	1	1	0.9784
Feng_Q_2015_NC_ERR688589.NODE_46_157332	Unassigned	Unassigned	Unassigned	577_12	Clustered	32	VC_577_12	32	0.2168	1	0.2168	1	1	1	0.8649
Feng_Q_2015_NC_ERR688589.NODE_52_150807	Unassigned	Unassigned	Unassigned	580_1	Clustered	38	VC_580_1	38	0.4731	1	0.4731	1	1	1	0.7568
Feng_Q_2015_NC_ERR688589.NODE_76_116818	Unassigned	Unassigned	Unassigned	578_1	Clustered	41	VC_578_1	41	0.4748	1	0.4748	1	1	1	0.8146
Feng_Q_2015_NC_ERR688592.NODE_149_84504	Unassigned	Unassigned	Unassigned	577_12	Clustered	32	VC_577_12	32	0.2168	1	0.2168	1	1	1	0.8649
Feng_Q_2015_NC_ERR688593.NODE_117_79004	Unassigned	Unassigned	Unassigned	574_0	Clustered	35	VC_574_0	35	0.6283	1	0.6283	1	1	1	0.9008
Feng_Q_2015_NC_ERR688593.NODE_462_38307	Unassigned	Unassigned	Unassigned	571_0	Clustered	104	VC_571_0	104	0.7505	1	0.7505	1	1	1	0.9994
Feng_Q_2015_NC_ERR688593.NODE_61_106133	Unassigned	Unassigned	Unassigned	581_3	Clustered	17	VC_581_3	17	0.172	1	0.172	1	1	1	0.9559
Feng_Q_2015_NC_ERR688604.NODE_185_81020	Unassigned	Unassigned	Unassigned	574_0	Clustered	35	VC_574_0	35	0.6283	1	0.6283	1	1	1	0.9008
Feng_Q_2015_NC_ERR688605.NODE_11_256862	Unassigned	Unassigned	Unassigned	578_0	Clustered	5	VC_578_0	5	0.0299	1	0.0299	1	1	1	1
Feng_Q_2015_NC_ERR688605.NODE_12_251688	Unassigned	Unassigned	Unassigned	581_5	Clustered	21	VC_581_5	21	0.1627	1	0.1627	1	1	1	0.881
Feng_Q_2015_NC_ERR688605.NODE_144_63822	Unassigned	Unassigned	Unassigned	680_0	Clustered	35	VC_680_0	35	0.8322	1	0.8322	1	1	1	1
Feng_Q_2015_NC_ERR688605.NODE_29_163335	Unassigned	Unassigned	Unassigned	577_12	Clustered	32	VC_577_12	32	0.2168	1	0.2168	1	1	1	0.8649
Feng_Q_2015_NC_ERR688605.NODE_42_133535	Unassigned	Unassigned	Unassigned	575_9	Clustered	10	VC_575_9	10	0.0936	1	0.0936	1	1	1	0.8444
Feng_Q_2015_NC_ERR688610.NODE_14_279815	Unassigned	Unassigned	Unassigned	581_5	Clustered	21	VC_581_5	21	0.1627	1	0.1627	1	1	1	0.881
Feng_Q_2015_NC_ERR688610.NODE_3_496081	Unassigned	Unassigned	Unassigned	577_9	Clustered/Singleton	1	VC_577_9	1	0	1	0	1	1	1	1
Feng_Q_2015_NC_ERR688610.NODE_6_403104	Unassigned	Unassigned	Unassigned	582_8	Clustered/Singleton	1	VC_582_8	1	0	1	0	1	1	1	1
Feng_Q_2015_NC_ERR688611.NODE_136_84245	Unassigned	Unassigned	Unassigned	581_1	Clustered	3	VC_581_1	3	0.0159	0.659243	0.0105	1	1	1	1
Feng_Q_2015_NC_ERR688611.NODE_169_75697	Unassigned	Unassigned	Unassigned	574_0	Clustered	35	VC_574_0	35	0.6283	1	0.6283	1	1	1	0.9008
Feng_Q_2015_NC_ERR688618.NODE_109_124524	Unassigned	Unassigned	Unassigned	574_0	Clustered	35	VC_574_0	35	0.6283	1	0.6283	1	1	1	0.9008
Feng_Q_2015_NC_ERR688618.NODE_12_352307	Unassigned	Unassigned	Unassigned	575_0	Clustered	2	VC_575_0	2	0.0055	0.931072	0.0051	1	1	1	0
Feng_Q_2015_NC_ERR688618.NODE_213_86366	Unassigned	Unassigned	Unassigned	578_1	Clustered	41	VC_578_1	41	0.4748	1	0.4748	1	1	1	0.8146
Feng_Q_2015_NC_ERR688618.NODE_5_518151	Unassigned	Unassigned	Unassigned	577_8	Clustered/Singleton	1	VC_577_8	1	0	1	0	1	1	1	1
Feng_Q_2015_NC_ERR688623.NODE_137_87382	Unassigned	Unassigned	Unassigned	582_2	Clustered	7	VC_582_2	7	0.0552	0.999448	0.0551	1	1	1	1
Feng_Q_2015_NC_ERR688624.NODE_13_239271	Unassigned	Unassigned	Unassigned	581_5	Clustered	21	VC_581_5	21	0.1627	1	0.1627	1	1	1	0.881
Feng_Q_2015_NC_ERR688624.NODE_154_87382	Unassigned	Unassigned	Unassigned	574_0	Clustered	35	VC_574_0	35	0.6283	1	0.6283	1	1	1	0.9008
Feng_Q_2015_NC_ERR688624.NODE_176_83618	Unassigned	Unassigned	Unassigned	579_0	Clustered	22	VC_579_0	22	0.374	1	0.374	1	1	1	0.9784
Feng_Q_2015_NC_ERR688624.NODE_178_82922	Unassigned	Unassigned	Unassigned	578_1	Clustered	41	VC_578_1	41	0.4748	1	0.4748	1	1	1	0.8146
Feng_Q_2015_NC_ERR688624.NODE_247_68574	Unassigned	Unassigned	Unassigned	580_0	Clustered	12	VC_580_0	12	0.1028	1	0.1028	1	1	1	0.7879
Feng_Q_2015_NC_ERR688626.NODE_21_215262	Unassigned	Unassigned	Unassigned	578_0	Clustered	5	VC_578_0	5	0.0299	1	0.0299	1	1	1	1
Feng_Q_2015_NC_ERR688626.NODE_24_209135	Unassigned	Unassigned	Unassigned	582_6	Clustered	7	VC_582_6	7	0.0707	0.999957	0.0706	1	1	1	0.7619
Feng_Q_2015_NC_ERR688626.NODE_44_153581	Unassigned	Unassigned	Unassigned	577_11	Clustered	4	VC_577_11	4	0.0267	0.999928	0.0267	1	1	1	1
Feng_Q_2015_NC_ERR688626.NODE_50_139189	Unassigned	Unassigned	Unassigned	577_2	Clustered	8	VC_577_2	8	0.0512	1	0.0512	1	1	1	1
Feng_Q_2015_NC_ERR688626.NODE_75_119800	Unassigned	Unassigned	Unassigned	580_1	Clustered	38	VC_580_1	38	0.4731	1	0.4731	1	1	1	0.7568
Feng_Q_2015_NC_ERR688632.NODE_10_226415	Unassigned	Unassigned	Unassigned	577_13	Clustered	26	VC_577_13	26	0.1496	1	0.1496	1	1	1	0.9908
Feng_Q_2015_NC_ERR688632.NODE_22_179180	Unassigned	Unassigned	Unassigned	580_1	Clustered	38	VC_580_1	38	0.4731	1	0.4731	1	1	1	0.7568
Feng_Q_2015_NC_ERR688632.NODE_56_124711	Unassigned	Unassigned	Unassigned	574_0	Clustered	35	VC_574_0	35	0.6283	1	0.6283	1	1	1	0.9008
Feng_Q_2015_NC_ERR688633.NODE_6706_6515	Unassigned	Unassigned	Unassigned	697_0	Clustered	2	VC_697_0	2	0.0132	0.855665	0.0113	1	1	1	1
Feng_Q_2015_NC_ERR688635.NODE_2103_16787	Unassigned	Unassigned	Unassigned	686_0	Clustered	3	VC_686_0	3	0.0211	0.659626	0.0139	1	1	1	1
Feng_Q_2015_NC_ERR688642.NODE_140_129000	Unassigned	Unassigned	Unassigned	577_2	Clustered	8	VC_577_2	8	0.0512	1	0.0512	1	1	1	1
Feng_Q_2015_NC_ERR688642.NODE_244_91493	Unassigned	Unassigned	Unassigned	582_7	Clustered/Singleton	1	VC_582_7	1	0	1	0	1	1	1	1
Feng_Q_2015_NC_ERR688642.NODE_262_85734	Unassigned	Unassigned	Unassigned	578_1	Clustered	41	VC_578_1	41	0.4748	1	0.4748	1	1	1	0.8146
Feng_Q_2015_NC_ERR688642.NODE_263_85708	Unassigned	Unassigned	Unassigned	582_2	Clustered	7	VC_582_2	7	0.0552	0.999448	0.0551	1	1	1	1
Feng_Q_2015_NC_ERR688642.NODE_74_174533	Unassigned	Unassigned	Unassigned	575_6	Clustered	8	VC_575_6	8	0.0633	1	0.0633	1	1	1	0.8571
Feng_Q_2015_NC_ERR688642.NODE_93_154348	Unassigned	Unassigned	Unassigned	581_4	Clustered	2	VC_581_4	2	0.01	0.919419	0.0092	1	1	1	1
Feng_Q_2015_NC_ERR710424.NODE_224_72588	Unassigned	Unassigned	Unassigned	577_12	Clustered	32	VC_577_12	32	0.2168	1	0.2168	1	1	1	0.8649
Feng_Q_2015_NC_ERR710424.NODE_25_230116	Unassigned	Unassigned	Unassigned	582_4	Clustered	20	VC_582_4	20	0.1778	1	0.1778	1	1	1	0.9053
Feng_Q_2015_NC_ERR710429.NODE_1634_15065	Unassigned	Unassigned	Unassigned	694_0	Clustered	3	VC_694_0	3	0.1544	0.981408	0.1515	1	1	1	1
Feng_Q_2015_NC_ERR710432.NODE_47_178432	Unassigned	Unassigned	Unassigned	580_1	Clustered	38	VC_580_1	38	0.4731	1	0.4731	1	1	1	0.7568
Feng_Q_2015_NC_ERR710432.NODE_62_151820	Unassigned	Unassigned	Unassigned	574_2	Clustered/Singleton	1	VC_574_2	1	0	1	0	1	1	1	1
Feng_Q_2015_NC_ERR710432.NODE_9_302670	Unassigned	Unassigned	Unassigned	577_14	Clustered	3	VC_577_14	3	0.0098	0.977006	0.0095	1	1	1	1
Flavobacterium~phage~1H	Caudovirales	Siphoviridae	Unahavirus	701_0	Clustered	4	VC_701_0	4	0.7738	0.999569	0.7734	1	1	1	1
Flavobacterium~phage~23T	Caudovirales	Siphoviridae	Unahavirus	701_0	Clustered	4	VC_701_0	4	0.7738	0.999569	0.7734	1	1	1	1
Flavobacterium~phage~2A	Caudovirales	Siphoviridae	Unahavirus	701_0	Clustered	4	VC_701_0	4	0.7738	0.999569	0.7734	1	1	1	1
Flavobacterium~phage~6H	Caudovirales	Siphoviridae	Unahavirus	701_0	Clustered	4	VC_701_0	4	0.7738	0.999569	0.7734	1	1	1	1
Flavobacterium~phage~FCL-2	Caudovirales	Myoviridae	Ficleduovirus	412_0	Clustered	2	VC_412_0	2	0.6254	0.930857	0.5821	1	1	1	1
Flavobacterium~phage~FCV-1	Caudovirales	Myoviridae	Ficleduovirus	412_0	Clustered	2	VC_412_0	2	0.6254	0.930857	0.5821	1	1	1	1
Flavobacterium~phage~FpV4	Caudovirales	Podoviridae	Fipvunavirus	702_0	Clustered	5	VC_702_0	5	0.7287	0.999999	0.7287	1	1	1	1
Flavobacterium~phage~Fpv1	Caudovirales	Podoviridae	Fipvunavirus	702_0	Clustered	5	VC_702_0	5	0.7287	0.999999	0.7287	1	1	1	1
Flavobacterium~phage~Fpv10	Caudovirales	Siphoviridae	Unassigned	704_0	Clustered	6	VC_704_0	6	0.8821	0.999995	0.8821	1	1	1	1
Flavobacterium~phage~Fpv11	Caudovirales	Siphoviridae	Unassigned	704_0	Clustered	6	VC_704_0	6	0.8821	0.999995	0.8821	1	1	1	1
Flavobacterium~phage~Fpv2	Caudovirales	Podoviridae	Fipvunavirus	702_0	Clustered	5	VC_702_0	5	0.7287	0.999999	0.7287	1	1	1	1
Flavobacterium~phage~Fpv20	Caudovirales	Podoviridae	Fipvunavirus	702_0	Clustered	5	VC_702_0	5	0.7287	0.999999	0.7287	1	1	1	1
Flavobacterium~phage~Fpv3	Caudovirales	Podoviridae	Fipvunavirus	702_0	Clustered	5	VC_702_0	5	0.7287	0.999999	0.7287	1	1	1	1
Flavobacterium~phage~Fpv5	Caudovirales	Siphoviridae	Unassigned	704_0	Clustered	6	VC_704_0	6	0.8821	0.999995	0.8821	1	1	1	1
Flavobacterium~phage~Fpv6	Caudovirales	Siphoviridae	Unassigned	704_0	Clustered	6	VC_704_0	6	0.8821	0.999995	0.8821	1	1	1	1
Flavobacterium~phage~Fpv7	Caudovirales	Siphoviridae	Unassigned	704_0	Clustered	6	VC_704_0	6	0.8821	0.999995	0.8821	1	1	1	1
Flavobacterium~phage~Fpv8	Caudovirales	Siphoviridae	Unassigned	704_0	Clustered	6	VC_704_0	6	0.8821	0.999995	0.8821	1	1	1	1
Flavobacterium~phage~vB_FspM_lotta8-1	Caudovirales	Myoviridae	Unassigned	410_0	Clustered	2	VC_410_0	2	0.6741	0.944845	0.6369	1	1	1	1
Flavobacterium~phage~vB_FspM_pippi8-1	Caudovirales	Myoviridae	Unassigned	410_0	Clustered	2	VC_410_0	2	0.6741	0.944845	0.6369	1	1	1	1
Flavobacterium~phage~vB_FspS_filifjonk9-1	Caudovirales	Siphoviridae	Unassigned	415_0	Clustered	12	VC_415_0	12	0.9858	1	0.9858	1	1	1	1
Flavobacterium~phage~vB_FspS_hattifnatt9-1	Caudovirales	Siphoviridae	Unassigned	415_0	Clustered	12	VC_415_0	12	0.9858	1	0.9858	1	1	1	1
Flavobacterium~phage~vB_FspS_hemulen6-1	Caudovirales	Siphoviridae	Unassigned	415_0	Clustered	12	VC_415_0	12	0.9858	1	0.9858	1	1	1	1
Flavobacterium~phage~vB_FspS_lillamy9-1	Caudovirales	Siphoviridae	Unassigned	415_0	Clustered	12	VC_415_0	12	0.9858	1	0.9858	1	1	1	1
Flavobacterium~phage~vB_FspS_morran9-1	Caudovirales	Siphoviridae	Unassigned	415_0	Clustered	12	VC_415_0	12	0.9858	1	0.9858	1	1	1	1
Flavobacterium~phage~vB_FspS_mumin9-1	Caudovirales	Siphoviridae	Unassigned	415_0	Clustered	12	VC_415_0	12	0.9858	1	0.9858	1	1	1	1
Flavobacterium~phage~vB_FspS_mymlan6-1	Caudovirales	Siphoviridae	Unassigned	415_0	Clustered	12	VC_415_0	12	0.9858	1	0.9858	1	1	1	1
Flavobacterium~phage~vB_FspS_sniff9-1	Caudovirales	Siphoviridae	Unassigned	415_0	Clustered	12	VC_415_0	12	0.9858	1	0.9858	1	1	1	1
Flavobacterium~phage~vB_FspS_snork6-1	Caudovirales	Siphoviridae	Unassigned	415_0	Clustered	12	VC_415_0	12	0.9858	1	0.9858	1	1	1	1
Flavobacterium~phage~vB_FspS_snusmum6-1	Caudovirales	Siphoviridae	Unassigned	415_0	Clustered	12	VC_415_0	12	0.9858	1	0.9858	1	1	1	1
Flavobacterium~phage~vB_FspS_stinky9-1	Caudovirales	Siphoviridae	Unassigned	415_0	Clustered	12	VC_415_0	12	0.9858	1	0.9858	1	1	1	1
Flavobacterium~phage~vB_FspS_tooticki6-1	Caudovirales	Siphoviridae	Unassigned	415_0	Clustered	12	VC_415_0	12	0.9858	1	0.9858	1	1	1	1
GPD|uvig_137293	Unassigned	Unassigned	Unassigned	680_0	Clustered	35	VC_680_0	35	0.8322	1	0.8322	1	1	1	1
GPD|uvig_145864	Unassigned	Unassigned	Unassigned	571_0	Clustered	104	VC_571_0	104	0.7505	1	0.7505	1	1	1	0.9994
GPD|uvig_147901	Unassigned	Unassigned	Unassigned	569_0	Clustered	37	VC_569_0	37	0.5818	1	0.5818	1	1	1	1
GPD|uvig_156887	Unassigned	Unassigned	Unassigned	571_0	Clustered	104	VC_571_0	104	0.7505	1	0.7505	1	1	1	0.9994
GPD|uvig_163399	Unassigned	Unassigned	Unassigned	573_0	Clustered	27	VC_573_0	27	0.7733	1	0.7733	1	1	1	1
GPD|uvig_163681	Unassigned	Unassigned	Unassigned	571_0	Clustered	104	VC_571_0	104	0.7505	1	0.7505	1	1	1	0.9994
GPD|uvig_174040	Unassigned	Unassigned	Unassigned	680_0	Clustered	35	VC_680_0	35	0.8322	1	0.8322	1	1	1	1
GPD|uvig_177382	Unassigned	Unassigned	Unassigned	571_0	Clustered	104	VC_571_0	104	0.7505	1	0.7505	1	1	1	0.9994
GPD|uvig_178408	Unassigned	Unassigned	Unassigned	677_0	Clustered	35	VC_677_0	35	0.8035	1	0.8035	1	1	1	0.8202
GPD|uvig_178441	Unassigned	Unassigned	Unassigned	571_0	Clustered	104	VC_571_0	104	0.7505	1	0.7505	1	1	1	0.9994
GPD|uvig_183331	Unassigned	Unassigned	Unassigned	573_0	Clustered	27	VC_573_0	27	0.7733	1	0.7733	1	1	1	1
GPD|uvig_185256	Unassigned	Unassigned	Unassigned	689_0	Clustered	15	VC_689_0	15	0.7387	1	0.7387	1	1	1	1
GPD|uvig_195409	Unassigned	Unassigned	Unassigned	569_0	Clustered	37	VC_569_0	37	0.5818	1	0.5818	1	1	1	1
GPD|uvig_196446	Unassigned	Unassigned	Unassigned	571_0	Clustered	104	VC_571_0	104	0.7505	1	0.7505	1	1	1	0.9994
GPD|uvig_204047	Unassigned	Unassigned	Unassigned	571_0	Clustered	104	VC_571_0	104	0.7505	1	0.7505	1	1	1	0.9994
GPD|uvig_204276	Unassigned	Unassigned	Unassigned	689_0	Clustered	15	VC_689_0	15	0.7387	1	0.7387	1	1	1	1
GPD|uvig_204331	Unassigned	Unassigned	Unassigned	714_0	Clustered	3	VC_714_0	3	0.6991	0.990951	0.6927	1	1	1	1
GPD|uvig_220840	Unassigned	Unassigned	Unassigned	571_0	Clustered	104	VC_571_0	104	0.7505	1	0.7505	1	1	1	0.9994
GPD|uvig_259726	Unassigned	Unassigned	Unassigned	573_0	Clustered	27	VC_573_0	27	0.7733	1	0.7733	1	1	1	1
GPD|uvig_281916	Unassigned	Unassigned	Unassigned	571_0	Clustered	104	VC_571_0	104	0.7505	1	0.7505	1	1	1	0.9994
GPD|uvig_305526	Unassigned	Unassigned	Unassigned	711_0	Clustered	3	VC_711_0	3	0.4882	0.99806	0.4872	1	1	1	1
GPD|uvig_330919	Unassigned	Unassigned	Unassigned	677_0	Clustered	35	VC_677_0	35	0.8035	1	0.8035	1	1	1	0.8202
GPD|uvig_333147	Unassigned	Unassigned	Unassigned	689_0	Clustered	15	VC_689_0	15	0.7387	1	0.7387	1	1	1	1
GPD|uvig_338096	Unassigned	Unassigned	Unassigned	569_0	Clustered	37	VC_569_0	37	0.5818	1	0.5818	1	1	1	1
GPD|uvig_351915	Unassigned	Unassigned	Unassigned	680_0	Clustered	35	VC_680_0	35	0.8322	1	0.8322	1	1	1	1
GPD|uvig_355152	Unassigned	Unassigned	Unassigned	571_0	Clustered	104	VC_571_0	104	0.7505	1	0.7505	1	1	1	0.9994
GPD|uvig_384462	Unassigned	Unassigned	Unassigned	569_0	Clustered	37	VC_569_0	37	0.5818	1	0.5818	1	1	1	1
GPD|uvig_418233	Unassigned	Unassigned	Unassigned	571_0	Clustered	104	VC_571_0	104	0.7505	1	0.7505	1	1	1	0.9994
GPD|uvig_441795	Unassigned	Unassigned	Unassigned	571_0	Clustered	104	VC_571_0	104	0.7505	1	0.7505	1	1	1	0.9994
GPD|uvig_447134	Unassigned	Unassigned	Unassigned	571_0	Clustered	104	VC_571_0	104	0.7505	1	0.7505	1	1	1	0.9994
GPD|uvig_487713	Unassigned	Unassigned	Unassigned	677_0	Clustered	35	VC_677_0	35	0.8035	1	0.8035	1	1	1	0.8202
GPD|uvig_545215	Unassigned	Unassigned	Unassigned	569_0	Clustered	37	VC_569_0	37	0.5818	1	0.5818	1	1	1	1
GPD|uvig_552052	Unassigned	Unassigned	Unassigned	573_0	Clustered	27	VC_573_0	27	0.7733	1	0.7733	1	1	1	1
GPD|uvig_552115	Unassigned	Unassigned	Unassigned	573_0	Clustered	27	VC_573_0	27	0.7733	1	0.7733	1	1	1	1
GPD|uvig_552897	Unassigned	Unassigned	Unassigned	573_0	Clustered	27	VC_573_0	27	0.7733	1	0.7733	1	1	1	1
GPD|uvig_558240	Unassigned	Unassigned	Unassigned	677_0	Clustered	35	VC_677_0	35	0.8035	1	0.8035	1	1	1	0.8202
GPD|uvig_558467	Unassigned	Unassigned	Unassigned	573_0	Clustered	27	VC_573_0	27	0.7733	1	0.7733	1	1	1	1
GPD|uvig_558965	Unassigned	Unassigned	Unassigned	677_0	Clustered	35	VC_677_0	35	0.8035	1	0.8035	1	1	1	0.8202
GPD|uvig_565629	Unassigned	Unassigned	Unassigned	569_0	Clustered	37	VC_569_0	37	0.5818	1	0.5818	1	1	1	1
GPD|uvig_580462	Unassigned	Unassigned	Unassigned	718_0	Clustered	11	VC_718_0	11	0.8461	1	0.8461	1	1	1	1
GPD|uvig_584620	Unassigned	Unassigned	Unassigned	711_0	Clustered	3	VC_711_0	3	0.4882	0.99806	0.4872	1	1	1	1
GPD|uvig_587908	Unassigned	Unassigned	Unassigned	680_0	Clustered	35	VC_680_0	35	0.8322	1	0.8322	1	1	1	1
GPD|uvig_591342	Unassigned	Unassigned	Unassigned	569_0	Clustered	37	VC_569_0	37	0.5818	1	0.5818	1	1	1	1
GPD|uvig_591350	Unassigned	Unassigned	Unassigned	718_0	Clustered	11	VC_718_0	11	0.8461	1	0.8461	1	1	1	1
GPD|uvig_59249	Unassigned	Unassigned	Unassigned	571_0	Clustered	104	VC_571_0	104	0.7505	1	0.7505	1	1	1	0.9994
GPD|uvig_594210	Unassigned	Unassigned	Unassigned	677_0	Clustered	35	VC_677_0	35	0.8035	1	0.8035	1	1	1	0.8202
GPD|uvig_597759	Unassigned	Unassigned	Unassigned	677_0	Clustered	35	VC_677_0	35	0.8035	1	0.8035	1	1	1	0.8202
GPD|uvig_598747	Unassigned	Unassigned	Unassigned	680_0	Clustered	35	VC_680_0	35	0.8322	1	0.8322	1	1	1	1
GPD|uvig_86060	Unassigned	Unassigned	Unassigned	573_0	Clustered	27	VC_573_0	27	0.7733	1	0.7733	1	1	1	1
Geobacillus~phage~GBK2	Caudovirales	Siphoviridae	Unassigned	286_0	Clustered	3	VC_286_0	3	0.1699	0.938916	0.1595	3	1	1	0.6667
Geobacillus~phage~GBSV1	Caudovirales	Myoviridae	Svunavirus	139_0	Clustered	2	VC_139_0	2	0.1446	0.955888	0.1382	1	1	1	1
Geobacillus~phage~TP-84	Caudovirales	Siphoviridae	Tp84virus	286_0	Clustered	3	VC_286_0	3	0.1699	0.938916	0.1595	3	1	1	0.6667
Geobacillus~virus~E3	Caudovirales	Siphoviridae	Unassigned	220_2	Clustered/Singleton	1	VC_220_2	1	0	1	0	1	1	1	1
Gordonia~phage~Adgers	Caudovirales	Siphoviridae	Montyvirus	727_3	Clustered	12	VC_727_3	12	0.5172	1	0.5172	2	1	1	1
Gordonia~phage~Apricot	Caudovirales	Siphoviridae	Apricotvirus	729_1	Clustered/Singleton	1	VC_729_1	1	0	1	0	1	1	1	1
Gordonia~phage~Asapag	Caudovirales	Siphoviridae	Getalongvirus	729_0	Clustered	6	VC_729_0	6	0.5048	1	0.5048	3	1	1	1
Gordonia~phage~Attis	Caudovirales	Siphoviridae	Attisvirus	730_0	Clustered	2	VC_730_0	2	0.1543	0.954985	0.1473	1	1	1	1
Gordonia~phage~Avazak	Caudovirales	Siphoviridae	Unassigned	165_0	Clustered	12	VC_165_0	12	0.7236	1	0.7236	2	1	1	0.8788
Gordonia~phage~BENtherdunthat	Caudovirales	Siphoviridae	Getalongvirus	729_0	Clustered	6	VC_729_0	6	0.5048	1	0.5048	3	1	1	1
Gordonia~phage~Bachita	Caudovirales	Siphoviridae	Smoothievirus	740_0	Clustered	4	VC_740_0	4	0.3436	0.999908	0.3436	1	1	1	1
Gordonia~phage~BaxterFox	Caudovirales	Siphoviridae	Baxtervirus	730_1	Clustered	5	VC_730_1	5	0.3816	1	0.3816	2	1	1	0.9
Gordonia~phage~Beaver	Caudovirales	Siphoviridae	Montyvirus	727_3	Clustered	12	VC_727_3	12	0.5172	1	0.5172	2	1	1	1
Gordonia~phage~BetterKatz	Caudovirales	Siphoviridae	Betterkatzvirus	531_1	Clustered	2	VC_531_1	2	0.0636	0.955332	0.0608	2	1	1	1
Gordonia~phage~BirksAndSocks	Caudovirales	Siphoviridae	Montyvirus	727_3	Clustered	12	VC_727_3	12	0.5172	1	0.5172	2	1	1	1
Gordonia~phage~Blueberry	Caudovirales	Siphoviridae	Unassigned	532_0	Clustered	8	VC_532_0	8	0.6739	1	0.6739	1	1	1	1
Gordonia~phage~Brandonk123	Caudovirales	Siphoviridae	Vividuovirus	71_0	Clustered	5	VC_71_0	5	0.7785	0.999998	0.7785	2	1	1	1
Gordonia~phage~BrutonGaster	Caudovirales	Siphoviridae	Oneupvirus	740_1	Clustered	2	VC_740_1	2	0.0944	0.946376	0.0893	2	1	1	1
Gordonia~phage~CaptainKirk2	Caudovirales	Siphoviridae	Unassigned	532_0	Clustered	8	VC_532_0	8	0.6739	1	0.6739	1	1	1	1
Gordonia~phage~CarolAnn	Caudovirales	Siphoviridae	Unassigned	532_0	Clustered	8	VC_532_0	8	0.6739	1	0.6739	1	1	1	1
Gordonia~phage~Chelms	Caudovirales	Siphoviridae	Woesvirus	727_3	Clustered	12	VC_727_3	12	0.5172	1	0.5172	2	1	1	1
Gordonia~phage~Chikenjars	Caudovirales	Siphoviridae	Unassigned	165_0	Clustered	12	VC_165_0	12	0.7236	1	0.7236	2	1	1	0.8788
Gordonia~phage~ClubL	Caudovirales	Siphoviridae	Smoothievirus	740_0	Clustered	4	VC_740_0	4	0.3436	0.999908	0.3436	1	1	1	1
Gordonia~phage~Cozz	Caudovirales	Siphoviridae	Emalynvirus	732_0	Clustered	4	VC_732_0	4	0.6442	0.999951	0.6442	1	1	1	1
Gordonia~phage~Crocheter	Caudovirales	Siphoviridae	Unassigned	165_0	Clustered	12	VC_165_0	12	0.7236	1	0.7236	2	1	1	0.8788
Gordonia~phage~Cucurbita	Caudovirales	Siphoviridae	Smoothievirus	740_0	Clustered	4	VC_740_0	4	0.3436	0.999908	0.3436	1	1	1	1
Gordonia~phage~Demosthenes	Caudovirales	Siphoviridae	Demosthenesvirus	727_0	Clustered	3	VC_727_0	3	0.1083	0.998178	0.1081	1	1	1	1
Gordonia~phage~Duffington	Caudovirales	Siphoviridae	Unassigned	165_0	Clustered	12	VC_165_0	12	0.7236	1	0.7236	2	1	1	0.8788
Gordonia~phage~Emalyn	Caudovirales	Siphoviridae	Emalynvirus	732_0	Clustered	4	VC_732_0	4	0.6442	0.999951	0.6442	1	1	1	1
Gordonia~phage~Fairfaxidum	Caudovirales	Siphoviridae	Unassigned	532_0	Clustered	8	VC_532_0	8	0.6739	1	0.6739	1	1	1	1
Gordonia~phage~Flakey	Caudovirales	Siphoviridae	Montyvirus	727_3	Clustered	12	VC_727_3	12	0.5172	1	0.5172	2	1	1	1
Gordonia~phage~Fryberger	Caudovirales	Siphoviridae	Ronaldovirus	747_0	Clustered	2	VC_747_0	2	0.8757	0.935557	0.8192	1	1	1	1
Gordonia~phage~GMA1	Caudovirales	Siphoviridae	Unassigned	736_0	Clustered	3	VC_736_0	3	0.119	0.973628	0.1159	1	1	1	1
Gordonia~phage~GMA3	Caudovirales	Siphoviridae	Gamtrevirus	728_0	Clustered	5	VC_728_0	5	0.3216	1	0.3216	3	1	1	1
Gordonia~phage~GMA5	Caudovirales	Siphoviridae	Unassigned	192_0	Clustered	5	VC_192_0	5	0.6501	1	0.6501	2	1	1	1
Gordonia~phage~GMA7	Caudovirales	Siphoviridae	Getseptimavirus	727_2	Clustered	2	VC_727_2	2	0.0466	0.952022	0.0444	1	1	1	1
Gordonia~phage~GRU1	Caudovirales	Siphoviridae	Unassigned	536_0	Clustered	3	VC_536_0	3	0.5097	0.998273	0.5088	1	1	1	1
Gordonia~phage~GRU3	Caudovirales	Siphoviridae	Unassigned	192_0	Clustered	5	VC_192_0	5	0.6501	1	0.6501	2	1	1	1
Gordonia~phage~GTE2	Caudovirales	Siphoviridae	Emalynvirus	732_0	Clustered	4	VC_732_0	4	0.6442	0.999951	0.6442	1	1	1	1
Gordonia~phage~GTE5	Caudovirales	Siphoviridae	Unassigned	536_0	Clustered	3	VC_536_0	3	0.5097	0.998273	0.5088	1	1	1	1
Gordonia~phage~GTE6	Caudovirales	Siphoviridae	Unassigned	71_0	Clustered	5	VC_71_0	5	0.7785	0.999998	0.7785	2	1	1	1
Gordonia~phage~GTE7	Caudovirales	Siphoviridae	Getseptimavirus	727_2	Clustered	2	VC_727_2	2	0.0466	0.952022	0.0444	1	1	1	1
Gordonia~phage~GTE8	Caudovirales	Siphoviridae	Unassigned	536_0	Clustered	3	VC_536_0	3	0.5097	0.998273	0.5088	1	1	1	1
Gordonia~phage~Getalong	Caudovirales	Siphoviridae	Getalongvirus	729_0	Clustered	6	VC_729_0	6	0.5048	1	0.5048	3	1	1	1
Gordonia~phage~Gibbin	Caudovirales	Siphoviridae	Unassigned	746_0	Clustered	5	VC_746_0	5	0.4531	1	0.4531	1	1	1	1
Gordonia~phage~Gmala1	Caudovirales	Siphoviridae	Gordtnkvirus	728_0	Clustered	5	VC_728_0	5	0.3216	1	0.3216	3	1	1	1
Gordonia~phage~GodonK	Caudovirales	Siphoviridae	Godonkavirus	72_1	Clustered/Singleton	1	VC_72_1	1	0	1	0	1	1	1	1
Gordonia~phage~GordDuk1	Caudovirales	Siphoviridae	Gordtnkvirus	728_0	Clustered	5	VC_728_0	5	0.3216	1	0.3216	3	1	1	1
Gordonia~phage~GordTnk2	Caudovirales	Siphoviridae	Gordtnkvirus	728_0	Clustered	5	VC_728_0	5	0.3216	1	0.3216	3	1	1	1
Gordonia~phage~Gsput1	Caudovirales	Siphoviridae	Gesputvirus	150_0	Clustered	3	VC_150_0	3	0.7204	0.99798	0.7189	2	1	1	1
Gordonia~phage~Guacamole	Caudovirales	Siphoviridae	Unassigned	532_0	Clustered	8	VC_532_0	8	0.6739	1	0.6739	1	1	1	1
Gordonia~phage~Gustav	Caudovirales	Siphoviridae	Gustavvirus	149_0	Clustered	3	VC_149_0	3	0.3455	0.99849	0.345	2	1	1	1
Gordonia~phage~Horus	Caudovirales	Siphoviridae	Horusvirus	729_0	Clustered	6	VC_729_0	6	0.5048	1	0.5048	3	1	1	1
Gordonia~phage~Hotorobo	Caudovirales	Siphoviridae	Woesvirus	727_3	Clustered	12	VC_727_3	12	0.5172	1	0.5172	2	1	1	1
Gordonia~phage~Jellybones	Caudovirales	Siphoviridae	Montyvirus	727_3	Clustered	12	VC_727_3	12	0.5172	1	0.5172	2	1	1	1
Gordonia~phage~John316	Caudovirales	Siphoviridae	Montyvirus	727_3	Clustered	12	VC_727_3	12	0.5172	1	0.5172	2	1	1	1
Gordonia~phage~Jumbo	Caudovirales	Siphoviridae	Gorjumvirus	728_0	Clustered	5	VC_728_0	5	0.3216	1	0.3216	3	1	1	1
Gordonia~phage~Katyusha	Caudovirales	Siphoviridae	Demosthenesvirus	727_0	Clustered	3	VC_727_0	3	0.1083	0.998178	0.1081	1	1	1	1
Gordonia~phage~Kenna	Caudovirales	Siphoviridae	Getalongvirus	729_0	Clustered	6	VC_729_0	6	0.5048	1	0.5048	3	1	1	1
Gordonia~phage~Kenosha	Caudovirales	Siphoviridae	Unassigned	165_0	Clustered	12	VC_165_0	12	0.7236	1	0.7236	2	1	1	0.8788
Gordonia~phage~Kita	Caudovirales	Siphoviridae	Nymphadoravirus	730_1	Clustered	5	VC_730_1	5	0.3816	1	0.3816	2	1	1	0.9
Gordonia~phage~Kvothe	Caudovirales	Siphoviridae	Demosthenesvirus	727_0	Clustered	3	VC_727_0	3	0.1083	0.998178	0.1081	1	1	1	1
Gordonia~phage~Lambo	Caudovirales	Siphoviridae	Unassigned	746_0	Clustered	5	VC_746_0	5	0.4531	1	0.4531	1	1	1	1
Gordonia~phage~Lennon	Caudovirales	Siphoviridae	Vividuovirus	71_0	Clustered	5	VC_71_0	5	0.7785	0.999998	0.7785	2	1	1	1
Gordonia~phage~Mahdia	Caudovirales	Siphoviridae	Gustavvirus	149_0	Clustered	3	VC_149_0	3	0.3455	0.99849	0.345	2	1	1	1
Gordonia~phage~McGonagall	Caudovirales	Siphoviridae	Unassigned	192_0	Clustered	5	VC_192_0	5	0.6501	1	0.6501	2	1	1	1
Gordonia~phage~Monty	Caudovirales	Siphoviridae	Woesvirus	727_3	Clustered	12	VC_727_3	12	0.5172	1	0.5172	2	1	1	1
Gordonia~phage~Nymphadora	Caudovirales	Siphoviridae	Nymphadoravirus	730_1	Clustered	5	VC_730_1	5	0.3816	1	0.3816	2	1	1	0.9
Gordonia~phage~Obliviate	Caudovirales	Siphoviridae	Unassigned	532_0	Clustered	8	VC_532_0	8	0.6739	1	0.6739	1	1	1	1
Gordonia~phage~OhMyWard	Caudovirales	Siphoviridae	Unassigned	165_0	Clustered	12	VC_165_0	12	0.7236	1	0.7236	2	1	1	0.8788
Gordonia~phage~OneUp	Caudovirales	Siphoviridae	Smoothievirus	740_1	Clustered	2	VC_740_1	2	0.0944	0.946376	0.0893	2	1	1	1
Gordonia~phage~Phinally	Caudovirales	Siphoviridae	Unassigned	71_0	Clustered	5	VC_71_0	5	0.7785	0.999998	0.7785	2	1	1	1
Gordonia~phage~Phistory	Caudovirales	Siphoviridae	Phistoryvirus	729_0	Clustered	6	VC_729_0	6	0.5048	1	0.5048	3	1	1	1
Gordonia~phage~Ranch	Caudovirales	Siphoviridae	Unassigned	746_0	Clustered	5	VC_746_0	5	0.4531	1	0.4531	1	1	1	1
Gordonia~phage~Rickmore	Caudovirales	Siphoviridae	Unassigned	165_0	Clustered	12	VC_165_0	12	0.7236	1	0.7236	2	1	1	0.8788
Gordonia~phage~Ronaldo	Caudovirales	Siphoviridae	Ronaldovirus	747_0	Clustered	2	VC_747_0	2	0.8757	0.935557	0.8192	1	1	1	1
Gordonia~phage~Ruthy	Caudovirales	Siphoviridae	Ruthyvirus	531_1	Clustered	2	VC_531_1	2	0.0636	0.955332	0.0608	2	1	1	1
Gordonia~phage~Sadboi	Caudovirales	Siphoviridae	Unassigned	746_0	Clustered	5	VC_746_0	5	0.4531	1	0.4531	1	1	1	1
Gordonia~phage~Secretariat	Caudovirales	Siphoviridae	Unassigned	165_0	Clustered	12	VC_165_0	12	0.7236	1	0.7236	2	1	1	0.8788
Gordonia~phage~Smoothie	Caudovirales	Siphoviridae	Smoothievirus	740_0	Clustered	4	VC_740_0	4	0.3436	0.999908	0.3436	1	1	1	1
Gordonia~phage~SoilAssassin	Caudovirales	Siphoviridae	Attisvirus	730_0	Clustered	2	VC_730_0	2	0.1543	0.954985	0.1473	1	1	1	1
Gordonia~phage~Sombrero	Caudovirales	Siphoviridae	Montyvirus	727_3	Clustered	12	VC_727_3	12	0.5172	1	0.5172	2	1	1	1
Gordonia~phage~Splinter	Caudovirales	Siphoviridae	Vendettavirus	150_0	Clustered	3	VC_150_0	3	0.7204	0.99798	0.7189	2	1	1	1
Gordonia~phage~SteveFrench	Caudovirales	Siphoviridae	Montyvirus	727_3	Clustered	12	VC_727_3	12	0.5172	1	0.5172	2	1	1	1
Gordonia~phage~Suzy	Caudovirales	Siphoviridae	Terapinvirus	737_0	Clustered	2	VC_737_0	2	0.1638	0.952708	0.156	1	1	1	1
Gordonia~phage~Tanis	Caudovirales	Siphoviridae	Unassigned	165_0	Clustered	12	VC_165_0	12	0.7236	1	0.7236	2	1	1	0.8788
Gordonia~phage~Terapin	Caudovirales	Siphoviridae	Terapinvirus	737_0	Clustered	2	VC_737_0	2	0.1638	0.952708	0.156	1	1	1	1
Gordonia~phage~Trine	Caudovirales	Siphoviridae	Trinevirus	149_0	Clustered	3	VC_149_0	3	0.3455	0.99849	0.345	2	1	1	1
Gordonia~phage~Troje	Caudovirales	Siphoviridae	Emalynvirus	732_0	Clustered	4	VC_732_0	4	0.6442	0.999951	0.6442	1	1	1	1
Gordonia~phage~Twister6	Caudovirales	Siphoviridae	Wizardvirus	73_0	Clustered	2	VC_73_0	2	0.3252	0.952802	0.3098	1	1	1	1
Gordonia~phage~UmaThurman	Caudovirales	Siphoviridae	Unassigned	532_0	Clustered	8	VC_532_0	8	0.6739	1	0.6739	1	1	1	1
Gordonia~phage~Untouchable	Caudovirales	Siphoviridae	Unassigned	165_0	Clustered	12	VC_165_0	12	0.7236	1	0.7236	2	1	1	0.8788
Gordonia~phage~Utz	Caudovirales	Siphoviridae	Unassigned	532_0	Clustered	8	VC_532_0	8	0.6739	1	0.6739	1	1	1	1
Gordonia~phage~Vendetta	Caudovirales	Siphoviridae	Vendettavirus	150_0	Clustered	3	VC_150_0	3	0.7204	0.99798	0.7189	2	1	1	1
Gordonia~phage~Vivi2	Caudovirales	Siphoviridae	Vividuovirus	71_0	Clustered	5	VC_71_0	5	0.7785	0.999998	0.7785	2	1	1	1
Gordonia~phage~Wizard	Caudovirales	Siphoviridae	Wizardvirus	73_0	Clustered	2	VC_73_0	2	0.3252	0.952802	0.3098	1	1	1	1
Gordonia~phage~Woes	Caudovirales	Siphoviridae	Woesvirus	727_3	Clustered	12	VC_727_3	12	0.5172	1	0.5172	2	1	1	1
Gordonia~phage~Yeezy	Caudovirales	Siphoviridae	Baxtervirus	730_1	Clustered	5	VC_730_1	5	0.3816	1	0.3816	2	1	1	0.9
Gordonia~phage~Yikes	Caudovirales	Siphoviridae	Unassigned	746_0	Clustered	5	VC_746_0	5	0.4531	1	0.4531	1	1	1	1
Gordonia~phage~Yvonnetastic	Caudovirales	Siphoviridae	Yvonnevirus	740_2	Clustered/Singleton	1	VC_740_2	1	0	1	0	1	1	1	1
Gordonia~phage~Zirinka	Caudovirales	Siphoviridae	Nymphadoravirus	730_1	Clustered	5	VC_730_1	5	0.3816	1	0.3816	2	1	1	0.9
HMP.158499257.contig46474_38876	Unassigned	Unassigned	Unassigned	571_0	Clustered	104	VC_571_0	104	0.7505	1	0.7505	1	1	1	0.9994
HMP.370027359.contig60005_6711	Unassigned	Unassigned	Unassigned	708_0	Clustered	3	VC_708_0	3	0.0538	0.9431	0.0507	1	1	1	1
HMP.706846339.contig81847_53536	Unassigned	Unassigned	Unassigned	677_0	Clustered	35	VC_677_0	35	0.8035	1	0.8035	1	1	1	0.8202
HMP.763678604.contig63623_40452	Unassigned	Unassigned	Unassigned	573_0	Clustered	27	VC_573_0	27	0.7733	1	0.7733	1	1	1	1
HMP.763860675.contig65806_66934	Unassigned	Unassigned	Unassigned	577_12	Clustered	32	VC_577_12	32	0.2168	1	0.2168	1	1	1	0.8649
HMP.763860675.contig67146_10080	Unassigned	Unassigned	Unassigned	687_0	Clustered	7	VC_687_0	7	0.1878	0.999987	0.1878	1	1	1	1
HMP.764062976.contig18993_126298	Unassigned	Unassigned	Unassigned	581_0	Clustered	19	VC_581_0	19	0.1969	1	0.1969	1	1	1	1
HMP.764062976.contig215436_8358	Unassigned	Unassigned	Unassigned	688_0	Clustered	6	VC_688_0	6	0.1521	1	0.1521	1	1	1	1
HMP.764062976.contig36899_56556	Unassigned	Unassigned	Unassigned	677_0	Clustered	35	VC_677_0	35	0.8035	1	0.8035	1	1	1	0.8202
HMP.764062976.contig62638_78500	Unassigned	Unassigned	Unassigned	579_0	Clustered	22	VC_579_0	22	0.374	1	0.374	1	1	1	0.9784
HMP.764083206.contig155544_8721	Unassigned	Unassigned	Unassigned	681_0	Clustered	11	VC_681_0	11	0.095	1	0.095	1	1	1	1
HMP.SRS048870.scaffold27331_1	Unassigned	Unassigned	Unassigned	685_0	Clustered	2	VC_685_0	2	0.317	0.729854	0.2314	1	1	1	1
HMP.SRS048870.scaffold89200_1	Unassigned	Unassigned	Unassigned	685_0	Clustered	2	VC_685_0	2	0.317	0.729854	0.2314	1	1	1	1
HMP.SRS049773.contig8443_4801	Unassigned	Unassigned	Unassigned	697_0	Clustered	2	VC_697_0	2	0.0132	0.855665	0.0113	1	1	1	1
HMP.SRS055017.contig131148_8109	Unassigned	Unassigned	Unassigned	708_0	Clustered	3	VC_708_0	3	0.0538	0.9431	0.0507	1	1	1	1
HMP.SRS055017.contig37574_35635	Unassigned	Unassigned	Unassigned	677_0	Clustered	35	VC_677_0	35	0.8035	1	0.8035	1	1	1	0.8202
HMP.SRS077024.contig34979_404	Unassigned	Unassigned	Unassigned	709_0	Clustered	2	VC_709_0	2	0.0124	0.950321	0.0118	1	1	1	1
HMP.SRS1041033.contig18634_8187	Unassigned	Unassigned	Unassigned	684_0	Clustered	2	VC_684_0	2	0.0315	0.718402	0.0227	1	1	1	1
HMP.SRS148196.contig141895_1499	Unassigned	Unassigned	Unassigned	713_0	Clustered	3	VC_713_0	3	0.0772	0.984152	0.076	1	1	1	1
Haemophilus~phage~Aaphi23	Caudovirales	Myoviridae	Unassigned	120_0	Clustered	13	VC_120_0	13	0.7992	1	0.7992	1	2	2	1
Haemophilus~virus~HP1	Caudovirales	Myoviridae	Hp1virus	118_0	Clustered	14	VC_118_0	14	0.9322	1	0.9322	8	1	1	1
Haemophilus~virus~HP2	Caudovirales	Myoviridae	Hp1virus	118_0	Clustered	14	VC_118_0	14	0.9322	1	0.9322	8	1	1	1
Haloarcula~californiae~icosahedral~virus~1	Halopanivirales	Sphaerolipoviridae	Alphasphaerolipovirus	761_0	Clustered	4	VC_761_0	4	1	1	1	1	1	1	1
Haloarcula~hispanica~icosahedral~virus~2	Halopanivirales	Sphaerolipoviridae	Alphasphaerolipovirus	761_0	Clustered	4	VC_761_0	4	1	1	1	1	1	1	1
Haloarcula~hispanica~pleomorphic~virus~1	Haloruvirales	Pleolipoviridae	Alphapleolipovirus	762_0	Clustered	5	VC_762_0	5	1	1	1	1	1	1	1
Haloarcula~hispanica~pleomorphic~virus~2	Haloruvirales	Pleolipoviridae	Alphapleolipovirus	762_0	Clustered	5	VC_762_0	5	1	1	1	1	1	1	1
Haloarcula~hispanica~pleomorphic~virus~3	Haloruvirales	Pleolipoviridae	Betapleolipovirus	763_0	Clustered	2	VC_763_0	2	0.811	0.729854	0.5919	1	1	1	1
Haloarcula~hispanica~pleomorphic~virus~4	Haloruvirales	Pleolipoviridae	Betapleolipovirus	763_0	Clustered	2	VC_763_0	2	0.811	0.729854	0.5919	1	1	1	1
Haloarcula~hispanica~virus~PH1	Halopanivirales	Sphaerolipoviridae	Alphasphaerolipovirus	761_0	Clustered	4	VC_761_0	4	1	1	1	1	1	1	1
Haloarcula~hispanica~virus~SH1	Halopanivirales	Sphaerolipoviridae	Alphasphaerolipovirus	761_0	Clustered	4	VC_761_0	4	1	1	1	1	1	1	1
Halogeometricum~pleomorphic~virus~1	Haloruvirales	Pleolipoviridae	Betapleolipovirus	765_0	Clustered	3	VC_765_0	3	0.8072	0.974085	0.7863	2	2	2	1
Halomonas~virus~HAP1	Caudovirales	Myoviridae	Hapunavirus	583_0	Clustered	2	VC_583_0	2	0.2534	0.937339	0.2375	1	1	1	1
Halorubrum~phage~CGphi46	Unassigned	Unassigned	Unassigned	141_0	Clustered	2	VC_141_0	2	0.776	0.814453	0.632	1	2	2	1
Halorubrum~phage~HF2	Caudovirales	Myoviridae	Unassigned	767_0	Clustered	3	VC_767_0	3	0.6247	0.994822	0.6215	1	1	1	1
Halorubrum~pleomorphic~virus~1	Haloruvirales	Pleolipoviridae	Alphapleolipovirus	762_0	Clustered	5	VC_762_0	5	1	1	1	1	1	1	1
Halorubrum~pleomorphic~virus~10	Haloruvirales	Pleolipoviridae	Betapleolipovirus	764_0	Clustered	3	VC_764_0	3	0.9025	0.959572	0.866	1	1	1	1
Halorubrum~pleomorphic~virus~11	Haloruvirales	Pleolipoviridae	Betapleolipovirus	764_0	Clustered	3	VC_764_0	3	0.9025	0.959572	0.866	1	1	1	1
Halorubrum~pleomorphic~virus~12	Haloruvirales	Pleolipoviridae	Betapleolipovirus	764_0	Clustered	3	VC_764_0	3	0.9025	0.959572	0.866	1	1	1	1
Halorubrum~pleomorphic~virus~2	Haloruvirales	Pleolipoviridae	Alphapleolipovirus	762_0	Clustered	5	VC_762_0	5	1	1	1	1	1	1	1
Halorubrum~pleomorphic~virus~6	Haloruvirales	Pleolipoviridae	Alphapleolipovirus	762_0	Clustered	5	VC_762_0	5	1	1	1	1	1	1	1
Halovirus~HCTV-1	Unassigned	Unassigned	Unassigned	766_0	Clustered	3	VC_766_0	3	0.8684	0.992876	0.8622	1	1	1	1
Halovirus~HCTV-2	Unassigned	Unassigned	Unassigned	769_0	Clustered	2	VC_769_0	2	0.4513	0.855578	0.3861	1	1	1	1
Halovirus~HCTV-5	Unassigned	Unassigned	Unassigned	766_0	Clustered	3	VC_766_0	3	0.8684	0.992876	0.8622	1	1	1	1
Halovirus~HHTV-2	Unassigned	Unassigned	Unassigned	769_0	Clustered	2	VC_769_0	2	0.4513	0.855578	0.3861	1	1	1	1
Halovirus~HRTV-5	Caudovirales	Myoviridae	Unassigned	767_0	Clustered	3	VC_767_0	3	0.6247	0.994822	0.6215	1	1	1	1
Halovirus~HRTV-8	Caudovirales	Myoviridae	Unassigned	767_0	Clustered	3	VC_767_0	3	0.6247	0.994822	0.6215	1	1	1	1
Halovirus~HVTV-1	Unassigned	Unassigned	Unassigned	766_0	Clustered	3	VC_766_0	3	0.8684	0.992876	0.8622	1	1	1	1
Hamiltonella~virus~APSE1	Caudovirales	Podoviridae	Unassigned	332_0	Clustered	2	VC_332_0	2	0.0898	0.95565	0.0858	1	1	1	1
Helicobacter~phage~1961P	Caudovirales	Podoviridae	Una961virus	770_0	Clustered	4	VC_770_0	4	1	1	1	2	1	1	1
Helicobacter~phage~KHP30	Caudovirales	Podoviridae	Una961virus	770_0	Clustered	4	VC_770_0	4	1	1	1	2	1	1	1
Helicobacter~phage~KHP40	Caudovirales	Podoviridae	Una961virus	770_0	Clustered	4	VC_770_0	4	1	1	1	2	1	1	1
Helicobacter~phage~phiHP33	Caudovirales	Podoviridae	Schmidvirus	770_0	Clustered	4	VC_770_0	4	1	1	1	2	1	1	1
IMG|DTR_387488	Unassigned	Unassigned	Unassigned	718_0	Clustered	11	VC_718_0	11	0.8461	1	0.8461	1	1	1	1
IMG|DTR_392373	Unassigned	Unassigned	Unassigned	680_0	Clustered	35	VC_680_0	35	0.8322	1	0.8322	1	1	1	1
IMG|DTR_584019	Unassigned	Unassigned	Unassigned	573_0	Clustered	27	VC_573_0	27	0.7733	1	0.7733	1	1	1	1
IMG|DTR_733507	Unassigned	Unassigned	Unassigned	571_0	Clustered	104	VC_571_0	104	0.7505	1	0.7505	1	1	1	0.9994
IMG|GCA_003963595.1	Unassigned	Unassigned	Unassigned	771_0	Clustered	8	VC_771_0	8	0.9774	0.920037	0.8992	1	1	1	1
IMG|GCA_003963895.1	Unassigned	Unassigned	Unassigned	771_0	Clustered	8	VC_771_0	8	0.9774	0.920037	0.8992	1	1	1	1
IMG|GCA_003964035.1	Unassigned	Unassigned	Unassigned	773_0	Clustered	6	VC_773_0	6	0.9056	0.998197	0.904	1	1	1	1
IMG|GCA_003964135.1	Unassigned	Unassigned	Unassigned	772_0	Clustered	2	VC_772_0	2	0.2325	0.827111	0.1923	1	1	1	1
IMG|IMGVR_UViG_2065487003_000002|2065487003|mockstg_il_soap_contig_48	Unassigned	Unassigned	Unassigned	571_0	Clustered	104	VC_571_0	104	0.7505	1	0.7505	1	1	1	0.9994
IMG|IMGVR_UViG_2554235476_000001|2554235476|2554309869	Unassigned	Unassigned	Unassigned	765_0	Clustered	3	VC_765_0	3	0.8072	0.974085	0.7863	2	2	2	1
IMG|IMGVR_UViG_2554235498_000001|2554235498|2554311572	Unassigned	Unassigned	Unassigned	765_0	Clustered	3	VC_765_0	3	0.8072	0.974085	0.7863	2	2	2	1
IMG|IMGVR_UViG_3300007802_000040|3300007802|Ga0105667_101691	Unassigned	Unassigned	Unassigned	710_0	Clustered	2	VC_710_0	2	0.051	0.952541	0.0486	1	1	1	1
IMG|IMGVR_UViG_3300008132_000081|3300008132|Ga0111230_1002000	Unassigned	Unassigned	Unassigned	714_0	Clustered	3	VC_714_0	3	0.6991	0.990951	0.6927	1	1	1	1
IMG|IMGVR_UViG_3300008268_000037|3300008268|Ga0111491_1000709	Unassigned	Unassigned	Unassigned	571_0	Clustered	104	VC_571_0	104	0.7505	1	0.7505	1	1	1	0.9994
IMG|IMGVR_UViG_3300008299_000034|3300008299|Ga0114868_1000657|1185-38654	Unassigned	Unassigned	Unassigned	571_0	Clustered	104	VC_571_0	104	0.7505	1	0.7505	1	1	1	0.9994
IMG|IMGVR_UViG_3300008523_000017|3300008523|Ga0115231_1000581	Unassigned	Unassigned	Unassigned	571_0	Clustered	104	VC_571_0	104	0.7505	1	0.7505	1	1	1	0.9994
IMG|IMGVR_UViG_3300008725_000008|3300008725|Ga0115670_1000674	Unassigned	Unassigned	Unassigned	573_0	Clustered	27	VC_573_0	27	0.7733	1	0.7733	1	1	1	1
IMG|IMGVR_UViG_3300010278_000002|3300010278|Ga0129311_1000428	Unassigned	Unassigned	Unassigned	571_0	Clustered	104	VC_571_0	104	0.7505	1	0.7505	1	1	1	0.9994
IMG|IMGVR_UViG_3300014028_000007|3300014028|Ga0117810_1000126	Unassigned	Unassigned	Unassigned	680_0	Clustered	35	VC_680_0	35	0.8322	1	0.8322	1	1	1	1
IMG|IMGVR_UViG_3300021255_000120|3300021255|Ga0223825_12561298	Unassigned	Unassigned	Unassigned	774_0	Clustered	3	VC_774_0	3	0.7406	0.959572	0.7106	1	1	1	1
IMG|IMGVR_UViG_3300021256_000170|3300021256|Ga0223826_10001368	Unassigned	Unassigned	Unassigned	774_0	Clustered	3	VC_774_0	3	0.7406	0.959572	0.7106	1	1	1	1
IMG|IMGVR_UViG_3300021399_000238|3300021399|Ga0224415_10000710	Unassigned	Unassigned	Unassigned	774_0	Clustered	3	VC_774_0	3	0.7406	0.959572	0.7106	1	1	1	1
IMG|IMGVR_UViG_3300027976_000177|3300027976|Ga0209702_10003104	Unassigned	Unassigned	Unassigned	549_0	Clustered	8	VC_549_0	8	0.7615	1	0.7615	1	2	2	1
IMG|IMGVR_UViG_3300029718_000038|3300029718|Ga0245237_1001780	Unassigned	Unassigned	Unassigned	573_0	Clustered	27	VC_573_0	27	0.7733	1	0.7733	1	1	1	1
IMG|IMGVR_UViG_3300029852_000010|3300029852|Ga0245291_100449	Unassigned	Unassigned	Unassigned	680_0	Clustered	35	VC_680_0	35	0.8322	1	0.8322	1	1	1	1
IMG|IMGVR_UViG_3300029871_000021|3300029871|Ga0245314_100772	Unassigned	Unassigned	Unassigned	573_0	Clustered	27	VC_573_0	27	0.7733	1	0.7733	1	1	1	1
IMG|IMGVR_UViG_3300029885_000006|3300029885|Ga0245329_100482|1171-40797	Unassigned	Unassigned	Unassigned	569_0	Clustered	37	VC_569_0	37	0.5818	1	0.5818	1	1	1	1
IMG|NC_039061.1	Unassigned	Unassigned	Unassigned	771_0	Clustered	8	VC_771_0	8	0.9774	0.920037	0.8992	1	1	1	1
IMG|NC_039062.1	Unassigned	Unassigned	Unassigned	772_0	Clustered	2	VC_772_0	2	0.2325	0.827111	0.1923	1	1	1	1
IMG|NC_039063.1	Unassigned	Unassigned	Unassigned	773_0	Clustered	6	VC_773_0	6	0.9056	0.998197	0.904	1	1	1	1
IMG|Norman_113_NODE_25_length_2504_cov_6.768477	Unassigned	Unassigned	Unassigned	771_0	Clustered	8	VC_771_0	8	0.9774	0.920037	0.8992	1	1	1	1
IMG|UGV-GENOME-0001201	Unassigned	Unassigned	Unassigned	771_0	Clustered	8	VC_771_0	8	0.9774	0.920037	0.8992	1	1	1	1
IMG|UGV-GENOME-0145846	Unassigned	Unassigned	Unassigned	571_0	Clustered	104	VC_571_0	104	0.7505	1	0.7505	1	1	1	0.9994
IMG|UGV-GENOME-0179807_1	Unassigned	Unassigned	Unassigned	718_0	Clustered	11	VC_718_0	11	0.8461	1	0.8461	1	1	1	1
IMG|UGV-GENOME-0189063	Unassigned	Unassigned	Unassigned	571_0	Clustered	104	VC_571_0	104	0.7505	1	0.7505	1	1	1	0.9994
IMG|UGV-GENOME-0200618	Unassigned	Unassigned	Unassigned	677_0	Clustered	35	VC_677_0	35	0.8035	1	0.8035	1	1	1	0.8202
IMG|UGV-GENOME-0209861	Unassigned	Unassigned	Unassigned	571_0	Clustered	104	VC_571_0	104	0.7505	1	0.7505	1	1	1	0.9994
IMG|UGV-GENOME-0226971	Unassigned	Unassigned	Unassigned	677_0	Clustered	35	VC_677_0	35	0.8035	1	0.8035	1	1	1	0.8202
IMG|UGV-GENOME-0228900	Unassigned	Unassigned	Unassigned	677_0	Clustered	35	VC_677_0	35	0.8035	1	0.8035	1	1	1	0.8202
IMG|UGV-GENOME-0231656	Unassigned	Unassigned	Unassigned	571_0	Clustered	104	VC_571_0	104	0.7505	1	0.7505	1	1	1	0.9994
IMG|UGV-GENOME-0239406	Unassigned	Unassigned	Unassigned	680_0	Clustered	35	VC_680_0	35	0.8322	1	0.8322	1	1	1	1
IMG|UGV-GENOME-0240165	Unassigned	Unassigned	Unassigned	571_0	Clustered	104	VC_571_0	104	0.7505	1	0.7505	1	1	1	0.9994
IMG|UGV-GENOME-0255461	Unassigned	Unassigned	Unassigned	571_0	Clustered	104	VC_571_0	104	0.7505	1	0.7505	1	1	1	0.9994
IMG|UGV-GENOME-0255724	Unassigned	Unassigned	Unassigned	571_0	Clustered	104	VC_571_0	104	0.7505	1	0.7505	1	1	1	0.9994
IMG|UGV-GENOME-0256087	Unassigned	Unassigned	Unassigned	571_0	Clustered	104	VC_571_0	104	0.7505	1	0.7505	1	1	1	0.9994
IMG|UGV-GENOME-0256185	Unassigned	Unassigned	Unassigned	571_0	Clustered	104	VC_571_0	104	0.7505	1	0.7505	1	1	1	0.9994
IMG|UGV-GENOME-0257216	Unassigned	Unassigned	Unassigned	571_0	Clustered	104	VC_571_0	104	0.7505	1	0.7505	1	1	1	0.9994
IMG|UGV-GENOME-0257348	Unassigned	Unassigned	Unassigned	571_0	Clustered	104	VC_571_0	104	0.7505	1	0.7505	1	1	1	0.9994
IMG|UGV-GENOME-0257711	Unassigned	Unassigned	Unassigned	571_0	Clustered	104	VC_571_0	104	0.7505	1	0.7505	1	1	1	0.9994
IMG|UGV-GENOME-0258495	Unassigned	Unassigned	Unassigned	571_0	Clustered	104	VC_571_0	104	0.7505	1	0.7505	1	1	1	0.9994
IMG|UGV-GENOME-0260234	Unassigned	Unassigned	Unassigned	571_0	Clustered	104	VC_571_0	104	0.7505	1	0.7505	1	1	1	0.9994
IMG|UGV-GENOME-0260310	Unassigned	Unassigned	Unassigned	571_0	Clustered	104	VC_571_0	104	0.7505	1	0.7505	1	1	1	0.9994
IMG|UGV-GENOME-0262162	Unassigned	Unassigned	Unassigned	571_0	Clustered	104	VC_571_0	104	0.7505	1	0.7505	1	1	1	0.9994
IMG|UGV-GENOME-0262696_1	Unassigned	Unassigned	Unassigned	571_0	Clustered	104	VC_571_0	104	0.7505	1	0.7505	1	1	1	0.9994
IMG|UGV-GENOME-0263128	Unassigned	Unassigned	Unassigned	571_0	Clustered	104	VC_571_0	104	0.7505	1	0.7505	1	1	1	0.9994
IMG|UGV-GENOME-0264891	Unassigned	Unassigned	Unassigned	571_0	Clustered	104	VC_571_0	104	0.7505	1	0.7505	1	1	1	0.9994
IMG|UGV-GENOME-0266066	Unassigned	Unassigned	Unassigned	571_0	Clustered	104	VC_571_0	104	0.7505	1	0.7505	1	1	1	0.9994
IMG|UGV-GENOME-0268635_1	Unassigned	Unassigned	Unassigned	571_0	Clustered	104	VC_571_0	104	0.7505	1	0.7505	1	1	1	0.9994
IMG|UGV-GENOME-0271153	Unassigned	Unassigned	Unassigned	569_0	Clustered	37	VC_569_0	37	0.5818	1	0.5818	1	1	1	1
IMG|UGV-GENOME-0271425	Unassigned	Unassigned	Unassigned	680_0	Clustered	35	VC_680_0	35	0.8322	1	0.8322	1	1	1	1
IMG|UGV-GENOME-0271646	Unassigned	Unassigned	Unassigned	569_0	Clustered	37	VC_569_0	37	0.5818	1	0.5818	1	1	1	1
IMG|UGV-GENOME-0274814	Unassigned	Unassigned	Unassigned	571_0	Clustered	104	VC_571_0	104	0.7505	1	0.7505	1	1	1	0.9994
IMG|UGV-GENOME-0303866	Unassigned	Unassigned	Unassigned	680_0	Clustered	35	VC_680_0	35	0.8322	1	0.8322	1	1	1	1
IMG|UGV-GENOME-0309168	Unassigned	Unassigned	Unassigned	569_0	Clustered	37	VC_569_0	37	0.5818	1	0.5818	1	1	1	1
IMG|UGV-GENOME-0313195	Unassigned	Unassigned	Unassigned	680_0	Clustered	35	VC_680_0	35	0.8322	1	0.8322	1	1	1	1
IMG|UGV-GENOME-0318191	Unassigned	Unassigned	Unassigned	677_0	Clustered	35	VC_677_0	35	0.8035	1	0.8035	1	1	1	0.8202
IMG|UGV-GENOME-0318983	Unassigned	Unassigned	Unassigned	680_0	Clustered	35	VC_680_0	35	0.8322	1	0.8322	1	1	1	1
IMG|UGV-GENOME-0320937_1	Unassigned	Unassigned	Unassigned	680_0	Clustered	35	VC_680_0	35	0.8322	1	0.8322	1	1	1	1
IMG|UGV-GENOME-0327529	Unassigned	Unassigned	Unassigned	689_0	Clustered	15	VC_689_0	15	0.7387	1	0.7387	1	1	1	1
IMG|UGV-GENOME-0334155_1	Unassigned	Unassigned	Unassigned	775_0	Clustered	2	VC_775_0	2	1	1	1	1	1	1	1
IMG|UGV-GENOME-0354002	Unassigned	Unassigned	Unassigned	698_0	Clustered	2	VC_698_0	2	0.2269	0.956375	0.217	1	1	1	1
IMG|UGV-GENOME-0373642	Unassigned	Unassigned	Unassigned	712_0	Clustered	6	VC_712_0	6	0.8878	1	0.8878	1	1	1	1
IMG|UGV-GENOME-0374504	Unassigned	Unassigned	Unassigned	712_0	Clustered	6	VC_712_0	6	0.8878	1	0.8878	1	1	1	1
IMG|UGV-GENOME-0375013	Unassigned	Unassigned	Unassigned	712_0	Clustered	6	VC_712_0	6	0.8878	1	0.8878	1	1	1	1
IMG|UGV-GENOME-2640363	Unassigned	Unassigned	Unassigned	773_0	Clustered	6	VC_773_0	6	0.9056	0.998197	0.904	1	1	1	1
IMG|UGV-GENOME-2871376	Unassigned	Unassigned	Unassigned	773_0	Clustered	6	VC_773_0	6	0.9056	0.998197	0.904	1	1	1	1
IMG|UGV-GENOME-4414252	Unassigned	Unassigned	Unassigned	571_0	Clustered	104	VC_571_0	104	0.7505	1	0.7505	1	1	1	0.9994
IMG|UGV-GENOME-4415077	Unassigned	Unassigned	Unassigned	571_0	Clustered	104	VC_571_0	104	0.7505	1	0.7505	1	1	1	0.9994
IMG|UGV-GENOME-4415268	Unassigned	Unassigned	Unassigned	571_0	Clustered	104	VC_571_0	104	0.7505	1	0.7505	1	1	1	0.9994
IMG|UGV-GENOME-4426261	Unassigned	Unassigned	Unassigned	677_0	Clustered	35	VC_677_0	35	0.8035	1	0.8035	1	1	1	0.8202
IMG|Yinda_HP22_trimmed_NODE_10_length_49556_cov_108.480657	Unassigned	Unassigned	Unassigned	680_0	Clustered	35	VC_680_0	35	0.8322	1	0.8322	1	1	1	1
Idiomarinaceae~phage~Phi1M2-2	Caudovirales	Siphoviridae	Unassigned	114_0	Clustered/Singleton	1	VC_114_0	1	0	1	0	1	1	1	1
Klebsiella~phage~1513	Caudovirales	Siphoviridae	Kp36virus	420_0	Clustered	18	VC_420_0	18	0.4906	1	0.4906	2	2	1	1
Klebsiella~phage~2044-307w	Caudovirales	Autographiviridae	Przondovirus	428_0	Clustered	22	VC_428_0	22	0.7106	1	0.7106	2	2	1	1
Klebsiella~phage~3~LV-2017	Caudovirales	Myoviridae	Peduovirus	119_0	Clustered	58	VC_119_0	58	0.8362	1	0.8362	15	2	2	1
Klebsiella~phage~4~LV-2017	Caudovirales	Myoviridae	Peduovirus	119_0	Clustered	58	VC_119_0	58	0.8362	1	0.8362	15	2	2	1
Klebsiella~phage~AltoGao	Caudovirales	Autographiviridae	Drulisvirus	543_0	Clustered	21	VC_543_0	21	0.7402	1	0.7402	3	2	1	1
Klebsiella~phage~F19	Caudovirales	Podoviridae	Kp34virus	543_0	Clustered	21	VC_543_0	21	0.7402	1	0.7402	3	2	1	1
Klebsiella~phage~GH-K3	Caudovirales	Drexlerviridae	Webervirus	420_0	Clustered	18	VC_420_0	18	0.4906	1	0.4906	2	2	1	1
Klebsiella~phage~Henu1	Caudovirales	Autographiviridae	Przondovirus	428_0	Clustered	22	VC_428_0	22	0.7106	1	0.7106	2	2	1	1
Klebsiella~phage~JD001	Caudovirales	Myoviridae	Jedunavirus	123_0	Clustered	20	VC_123_0	20	0.7883	1	0.7883	2	2	2	1
Klebsiella~phage~JD18	Caudovirales	Myoviridae	Jd18virus	48_10	Clustered	2	VC_48_10	2	0.0089	0.94549	0.0084	2	1	1	1
Klebsiella~phage~K11	Caudovirales	Podoviridae	Kp32virus	428_0	Clustered	22	VC_428_0	22	0.7106	1	0.7106	2	2	1	1
Klebsiella~phage~K5	Caudovirales	Podoviridae	Kp32virus	428_0	Clustered	22	VC_428_0	22	0.7106	1	0.7106	2	2	1	1
Klebsiella~phage~K5-2	Caudovirales	Autographiviridae	Przondovirus	428_0	Clustered	22	VC_428_0	22	0.7106	1	0.7106	2	2	1	1
Klebsiella~phage~K5-4	Caudovirales	Autographiviridae	Przondovirus	428_0	Clustered	22	VC_428_0	22	0.7106	1	0.7106	2	2	1	1
Klebsiella~phage~KLPN1	Caudovirales	Siphoviridae	Kp36virus	420_0	Clustered	18	VC_420_0	18	0.4906	1	0.4906	2	2	1	1
Klebsiella~phage~KOX1	Caudovirales	Drexlerviridae	Webervirus	420_0	Clustered	18	VC_420_0	18	0.4906	1	0.4906	2	2	1	1
Klebsiella~phage~KP-Rio/2015	Caudovirales	Autographiviridae	Drulisvirus	543_0	Clustered	21	VC_543_0	21	0.7402	1	0.7402	3	2	1	1
Klebsiella~phage~KP15	Caudovirales	Myoviridae	Kp15virus	101_0	Clustered	11	VC_101_0	11	0.2387	1	0.2387	3	2	2	1
Klebsiella~phage~KP27	Caudovirales	Myoviridae	Kp15virus	101_0	Clustered	11	VC_101_0	11	0.2387	1	0.2387	3	2	2	1
Klebsiella~phage~KP32	Caudovirales	Podoviridae	Kp32virus	428_0	Clustered	22	VC_428_0	22	0.7106	1	0.7106	2	2	1	1
Klebsiella~phage~KP34	Caudovirales	Podoviridae	Kp34virus	543_0	Clustered	21	VC_543_0	21	0.7402	1	0.7402	3	2	1	1
Klebsiella~phage~KP36	Caudovirales	Siphoviridae	Kp36virus	420_0	Clustered	18	VC_420_0	18	0.4906	1	0.4906	2	2	1	1
Klebsiella~phage~KP8	Caudovirales	Podoviridae	Gamaleyavirus	6_0	Clustered	22	VC_6_0	22	0.501	1	0.501	7	2	2	0.7792
Klebsiella~phage~KPN~N137	Caudovirales	Siphoviridae	Unassigned	22_0	Clustered	20	VC_22_0	20	0.8402	1	0.8402	2	2	2	0.9947
Klebsiella~phage~KPN~N141	Caudovirales	Drexlerviridae	Webervirus	420_0	Clustered	18	VC_420_0	18	0.4906	1	0.4906	2	2	1	1
Klebsiella~phage~KPV811	Caudovirales	Autographiviridae	Drulisvirus	543_0	Clustered	21	VC_543_0	21	0.7402	1	0.7402	3	2	1	1
Klebsiella~phage~Kp2	Caudovirales	Podoviridae	Kp34virus	543_0	Clustered	21	VC_543_0	21	0.7402	1	0.7402	3	2	1	1
Klebsiella~phage~KpCHEMY26	Caudovirales	Podoviridae	Ithacavirus	10_0	Clustered	5	VC_10_0	5	0.2243	1	0.2243	2	1	1	1
Klebsiella~phage~KpKT21phi1	Caudovirales	Drexlerviridae	Webervirus	420_0	Clustered	18	VC_420_0	18	0.4906	1	0.4906	2	2	1	1
Klebsiella~phage~KpV41	Caudovirales	Podoviridae	Kp34virus	543_0	Clustered	21	VC_543_0	21	0.7402	1	0.7402	3	2	1	1
Klebsiella~phage~KpV475	Caudovirales	Podoviridae	Kp34virus	543_0	Clustered	21	VC_543_0	21	0.7402	1	0.7402	3	2	1	1
Klebsiella~phage~KpV71	Caudovirales	Podoviridae	Kp34virus	543_0	Clustered	21	VC_543_0	21	0.7402	1	0.7402	3	2	1	1
Klebsiella~phage~Magnus	Caudovirales	Ackermannviridae	Taipeivirus	37_0	Clustered	8	VC_37_0	8	0.0604	0.99299	0.06	1	1	1	0.9643
Klebsiella~phage~Marfa	Caudovirales	Myoviridae	Unassigned	48_2	Clustered	5	VC_48_2	5	0.0404	1	0.0404	1	2	2	0.8
Klebsiella~phage~Matisse	Caudovirales	Myoviridae	Kp15virus	101_0	Clustered	11	VC_101_0	11	0.2387	1	0.2387	3	2	2	1
Klebsiella~phage~May	Caudovirales	Ackermannviridae	Taipeivirus	37_0	Clustered	8	VC_37_0	8	0.0604	0.99299	0.06	1	1	1	0.9643
Klebsiella~phage~Menlow	Caudovirales	Ackermannviridae	Taipeivirus	37_0	Clustered	8	VC_37_0	8	0.0604	0.99299	0.06	1	1	1	0.9643
Klebsiella~phage~MezzoGao	Caudovirales	Drexlerviridae	Webervirus	420_0	Clustered	18	VC_420_0	18	0.4906	1	0.4906	2	2	1	1
Klebsiella~phage~Miro	Caudovirales	Myoviridae	Kp15virus	101_0	Clustered	11	VC_101_0	11	0.2387	1	0.2387	3	2	2	1
Klebsiella~phage~NJR15	Caudovirales	Drexlerviridae	Webervirus	420_0	Clustered	18	VC_420_0	18	0.4906	1	0.4906	2	2	1	1
Klebsiella~phage~NJS1	Caudovirales	Drexlerviridae	Webervirus	420_0	Clustered	18	VC_420_0	18	0.4906	1	0.4906	2	2	1	1
Klebsiella~phage~NJS2	Caudovirales	Drexlerviridae	Webervirus	420_0	Clustered	18	VC_420_0	18	0.4906	1	0.4906	2	2	1	1
Klebsiella~phage~NTUH-K2044-K1-1	Caudovirales	Podoviridae	Kp34virus	543_0	Clustered	21	VC_543_0	21	0.7402	1	0.7402	3	2	1	1
Klebsiella~phage~PKO111	Caudovirales	Myoviridae	Jd18virus	48_11	Clustered/Singleton	1	VC_48_11	1	0	1	0	1	1	1	1
Klebsiella~phage~PKP126	Caudovirales	Siphoviridae	Kp36virus	420_0	Clustered	18	VC_420_0	18	0.4906	1	0.4906	2	2	1	1
Klebsiella~phage~PMBT1	Caudovirales	Myoviridae	Slopekvirus	101_0	Clustered	11	VC_101_0	11	0.2387	1	0.2387	3	2	2	1
Klebsiella~phage~Pharr	Caudovirales	Autographiviridae	Przondovirus	428_0	Clustered	22	VC_428_0	22	0.7106	1	0.7106	2	2	1	1
Klebsiella~phage~Pylas	Caudovirales	Podoviridae	Ithacavirus	10_0	Clustered	5	VC_10_0	5	0.2243	1	0.2243	2	1	1	1
Klebsiella~phage~SH-Kp~152410	Caudovirales	Autographiviridae	Przondovirus	428_0	Clustered	22	VC_428_0	22	0.7106	1	0.7106	2	2	1	1
Klebsiella~phage~ST13-OXA48phi12.1	Caudovirales	Myoviridae	Peduovirus	119_0	Clustered	58	VC_119_0	58	0.8362	1	0.8362	15	2	2	1
Klebsiella~phage~ST147-VIM1phi7.1	Caudovirales	Myoviridae	Peduovirus	119_0	Clustered	58	VC_119_0	58	0.8362	1	0.8362	15	2	2	1
Klebsiella~phage~ST15-OXA48phi14.1	Caudovirales	Myoviridae	Peduovirus	119_0	Clustered	58	VC_119_0	58	0.8362	1	0.8362	15	2	2	1
Klebsiella~phage~ST16-OXA48phi5.4	Caudovirales	Myoviridae	Peduovirus	119_0	Clustered	58	VC_119_0	58	0.8362	1	0.8362	15	2	2	1
Klebsiella~phage~ST437-OXA245phi4.1	Caudovirales	Myoviridae	Peduovirus	119_0	Clustered	58	VC_119_0	58	0.8362	1	0.8362	15	2	2	1
Klebsiella~phage~ST512-KPC3phi13.2	Caudovirales	Myoviridae	Peduovirus	119_0	Clustered	58	VC_119_0	58	0.8362	1	0.8362	15	2	2	1
Klebsiella~phage~Seifer	Caudovirales	Siphoviridae	Unassigned	22_0	Clustered	20	VC_22_0	20	0.8402	1	0.8402	2	2	2	0.9947
Klebsiella~phage~Soft	Caudovirales	Siphoviridae	Unassigned	22_0	Clustered	20	VC_22_0	20	0.8402	1	0.8402	2	2	2	0.9947
Klebsiella~phage~Sushi	Caudovirales	Siphoviridae	Kp36virus	420_0	Clustered	18	VC_420_0	18	0.4906	1	0.4906	2	2	1	1
Klebsiella~phage~TAH8	Caudovirales	Drexlerviridae	Webervirus	420_0	Clustered	18	VC_420_0	18	0.4906	1	0.4906	2	2	1	1
Klebsiella~phage~TSK1	Caudovirales	Drexlerviridae	Webervirus	420_0	Clustered	18	VC_420_0	18	0.4906	1	0.4906	2	2	1	1
Klebsiella~phage~ZCKP1	Caudovirales	Myoviridae	Phapecoctavirus	94_0	Clustered	6	VC_94_0	6	0.301	1	0.301	2	2	2	1
Klebsiella~phage~kpssk3	Caudovirales	Autographiviridae	Przondovirus	428_0	Clustered	22	VC_428_0	22	0.7106	1	0.7106	2	2	1	1
Klebsiella~phage~myPSH1235	Caudovirales	Autographiviridae	Drulisvirus	543_0	Clustered	21	VC_543_0	21	0.7402	1	0.7402	3	2	1	1
Klebsiella~phage~phiBO1E	Caudovirales	Autographiviridae	Drulisvirus	543_0	Clustered	21	VC_543_0	21	0.7402	1	0.7402	3	2	1	1
Klebsiella~phage~phiKO2	Caudovirales	Siphoviridae	Unassigned	376_0	Clustered	2	VC_376_0	2	0.1569	0.944527	0.1482	1	1	1	1
Klebsiella~phage~phiKpS2	Caudovirales	Autographiviridae	Drulisvirus	543_0	Clustered	21	VC_543_0	21	0.7402	1	0.7402	3	2	1	1
Klebsiella~phage~vB_KleM_RaK2	Caudovirales	Myoviridae	Alcyoneusvirus	127_5	Clustered/Singleton	1	VC_127_5	1	0	1	0	1	1	1	1
Klebsiella~phage~vB_Kp1	Caudovirales	Podoviridae	Kp32virus	428_0	Clustered	22	VC_428_0	22	0.7106	1	0.7106	2	2	1	1
Klebsiella~phage~vB_KpnM_BIS47	Caudovirales	Myoviridae	Unassigned	84_3	Clustered	5	VC_84_3	5	0.1216	0.999999	0.1216	1	1	1	1
Klebsiella~phage~vB_KpnM_KB57	Caudovirales	Myoviridae	Unassigned	84_3	Clustered	5	VC_84_3	5	0.1216	0.999999	0.1216	1	1	1	1
Klebsiella~phage~vB_KpnM_KpV477	Caudovirales	Myoviridae	Jiaodavirus	48_10	Clustered	2	VC_48_10	2	0.0089	0.94549	0.0084	2	1	1	1
Klebsiella~phage~vB_KpnM_KpV52	Caudovirales	Myoviridae	Jedunavirus	123_0	Clustered	20	VC_123_0	20	0.7883	1	0.7883	2	2	2	1
Klebsiella~phage~vB_KpnM_KpV79	Caudovirales	Myoviridae	Jedunavirus	123_0	Clustered	20	VC_123_0	20	0.7883	1	0.7883	2	2	2	1
Klebsiella~phage~vB_KpnP_BIS33	Caudovirales	Autographiviridae	Przondovirus	428_0	Clustered	22	VC_428_0	22	0.7106	1	0.7106	2	2	1	1
Klebsiella~phage~vB_KpnP_IL33	Caudovirales	Autographiviridae	Przondovirus	428_0	Clustered	22	VC_428_0	22	0.7106	1	0.7106	2	2	1	1
Klebsiella~phage~vB_KpnP_IME205	Caudovirales	Autographiviridae	Przondovirus	428_0	Clustered	22	VC_428_0	22	0.7106	1	0.7106	2	2	1	1
Klebsiella~phage~vB_KpnP_IME321	Caudovirales	Autographiviridae	Przondovirus	428_0	Clustered	22	VC_428_0	22	0.7106	1	0.7106	2	2	1	1
Klebsiella~phage~vB_KpnP_KpV289	Caudovirales	Podoviridae	Kp32virus	428_0	Clustered	22	VC_428_0	22	0.7106	1	0.7106	2	2	1	1
Klebsiella~phage~vB_KpnP_KpV48	Caudovirales	Autographiviridae	Drulisvirus	543_0	Clustered	21	VC_543_0	21	0.7402	1	0.7402	3	2	1	1
Klebsiella~phage~vB_KpnP_KpV74	Caudovirales	Autographiviridae	Drulisvirus	543_0	Clustered	21	VC_543_0	21	0.7402	1	0.7402	3	2	1	1
Klebsiella~phage~vB_KpnP_KpV763	Caudovirales	Autographiviridae	Przondovirus	428_0	Clustered	22	VC_428_0	22	0.7106	1	0.7106	2	2	1	1
Klebsiella~phage~vB_KpnP_KpV766	Caudovirales	Autographiviridae	Przondovirus	428_0	Clustered	22	VC_428_0	22	0.7106	1	0.7106	2	2	1	1
Klebsiella~phage~vB_KpnP_KpV767	Caudovirales	Autographiviridae	Przondovirus	428_0	Clustered	22	VC_428_0	22	0.7106	1	0.7106	2	2	1	1
Klebsiella~phage~vB_KpnP_PRA33	Caudovirales	Autographiviridae	Przondovirus	428_0	Clustered	22	VC_428_0	22	0.7106	1	0.7106	2	2	1	1
Klebsiella~phage~vB_KpnP_SU503	Caudovirales	Podoviridae	Kp34virus	543_0	Clustered	21	VC_543_0	21	0.7402	1	0.7402	3	2	1	1
Klebsiella~phage~vB_KpnP_SU552A	Caudovirales	Podoviridae	Kp34virus	543_0	Clustered	21	VC_543_0	21	0.7402	1	0.7402	3	2	1	1
Klebsiella~phage~vB_KpnS_IME279	Caudovirales	Podoviridae	Sortsnevirus	335_0	Clustered	7	VC_335_0	7	0.6613	1	0.6613	5	3	2	1
Klebsiella~phage~vB_KpnS_KpV522	Caudovirales	Drexlerviridae	Webervirus	420_0	Clustered	18	VC_420_0	18	0.4906	1	0.4906	2	2	1	1
Klebsiella~phage~vB_Kpn_F48	Caudovirales	Myoviridae	Unassigned	48_2	Clustered	5	VC_48_2	5	0.0404	1	0.0404	1	2	2	0.8
Klebsiella~virus~0507KN21	Caudovirales	Ackermannviridae	Taipeivirus	37_0	Clustered	8	VC_37_0	8	0.0604	0.99299	0.06	1	1	1	0.9643
Klebsiella~virus~GML-KpCol1	Caudovirales	Drexlerviridae	Webervirus	420_0	Clustered	18	VC_420_0	18	0.4906	1	0.4906	2	2	1	1
Klebsiella~virus~KP32	Caudovirales	Podoviridae	Kp32virus	428_0	Clustered	22	VC_428_0	22	0.7106	1	0.7106	2	2	1	1
Klebsiella~virus~KpS8	Caudovirales	Myoviridae	Unassigned	84_3	Clustered	5	VC_84_3	5	0.1216	0.999999	0.1216	1	1	1	1
Klebsiella~virus~UPM~2146	Caudovirales	Ackermannviridae	Taipeivirus	37_0	Clustered	8	VC_37_0	8	0.0604	0.99299	0.06	1	1	1	0.9643
Klebsiella~virus~vB_KpnM_KpS110	Caudovirales	Ackermannviridae	Taipeivirus	37_0	Clustered	8	VC_37_0	8	0.0604	0.99299	0.06	1	1	1	0.9643
Kluyvera~phage~Kvp1	Caudovirales	Podoviridae	T7virus	424_0	Clustered	59	VC_424_0	59	0.7461	1	0.7461	11	2	1	1
Lactobacillus~phage~3-521	Caudovirales	Herelleviridae	Unassigned	222_2	Clustered/Singleton	1	VC_222_2	1	0	1	0	1	1	1	1
Lactobacillus~phage~521B	Caudovirales	Herelleviridae	Unassigned	248_0	Clustered	2	VC_248_0	2	0.1155	0.95624	0.1104	1	1	1	1
Lactobacillus~phage~A2	Caudovirales	Siphoviridae	Unassigned	777_0	Clustered	13	VC_777_0	13	0.4554	1	0.4554	1	2	2	0.7308
Lactobacillus~phage~ATCC~8014-B2	Caudovirales	Siphoviridae	Douglaswolinvirus	776_1	Clustered	4	VC_776_1	4	0.3436	0.999975	0.3436	2	1	1	1
Lactobacillus~phage~BH1	Caudovirales	Siphoviridae	Unassigned	777_0	Clustered	13	VC_777_0	13	0.4554	1	0.4554	1	2	2	0.7308
Lactobacillus~phage~Bacchae	Caudovirales	Herelleviridae	Harbinvirus	222_0	Clustered	4	VC_222_0	4	0.261	0.999984	0.261	1	1	1	1
Lactobacillus~phage~Bromius	Caudovirales	Herelleviridae	Harbinvirus	222_0	Clustered	4	VC_222_0	4	0.261	0.999984	0.261	1	1	1	1
Lactobacillus~phage~Iacchus	Caudovirales	Herelleviridae	Harbinvirus	222_0	Clustered	4	VC_222_0	4	0.261	0.999984	0.261	1	1	1	1
Lactobacillus~phage~J-1	Caudovirales	Siphoviridae	Unassigned	777_0	Clustered	13	VC_777_0	13	0.4554	1	0.4554	1	2	2	0.7308
Lactobacillus~phage~KC5a	Caudovirales	Myoviridae	Unassigned	783_0	Clustered	4	VC_783_0	4	0.5991	0.999942	0.5991	1	1	1	1
Lactobacillus~phage~LF1	Caudovirales	Siphoviridae	Unassigned	778_0	Clustered	3	VC_778_0	3	0.1009	0.990204	0.0999	1	2	2	1
Lactobacillus~phage~LJ	Caudovirales	Siphoviridae	Unassigned	777_0	Clustered	13	VC_777_0	13	0.4554	1	0.4554	1	2	2	0.7308
Lactobacillus~phage~Lc-Nu	Caudovirales	Siphoviridae	Unassigned	777_0	Clustered	13	VC_777_0	13	0.4554	1	0.4554	1	2	2	0.7308
Lactobacillus~phage~Ld17	Caudovirales	Siphoviridae	C5virus	786_0	Clustered	6	VC_786_0	6	0.2099	1	0.2099	1	1	1	1
Lactobacillus~phage~Ld25A	Caudovirales	Siphoviridae	C5virus	786_0	Clustered	6	VC_786_0	6	0.2099	1	0.2099	1	1	1	1
Lactobacillus~phage~Ld3	Caudovirales	Siphoviridae	C5virus	786_0	Clustered	6	VC_786_0	6	0.2099	1	0.2099	1	1	1	1
Lactobacillus~phage~Ldl1	Caudovirales	Siphoviridae	Lidleunavirus	780_0	Clustered	2	VC_780_0	2	0.2034	0.948219	0.1929	1	1	1	1
Lactobacillus~phage~Lenus	Caudovirales	Siphoviridae	Lenusvirus	776_0	Clustered	3	VC_776_0	3	0.2826	0.998065	0.282	1	1	1	1
Lactobacillus~phage~Lpa804	Caudovirales	Herelleviridae	Harbinvirus	222_1	Clustered	3	VC_222_1	3	0.1128	0.994714	0.1122	2	2	1	0.6667
Lactobacillus~phage~LpeD	Caudovirales	Herelleviridae	Unassigned	222_1	Clustered	3	VC_222_1	3	0.1128	0.994714	0.1122	2	2	1	0.6667
Lactobacillus~phage~Lrm1	Caudovirales	Siphoviridae	Unassigned	777_0	Clustered	13	VC_777_0	13	0.4554	1	0.4554	1	2	2	0.7308
Lactobacillus~phage~Maenad	Caudovirales	Siphoviridae	Maenadvirus	776_1	Clustered	4	VC_776_1	4	0.3436	0.999975	0.3436	2	1	1	1
Lactobacillus~phage~Nyseid	Caudovirales	Siphoviridae	Lenusvirus	776_0	Clustered	3	VC_776_0	3	0.2826	0.998065	0.282	1	1	1	1
Lactobacillus~phage~P1	Caudovirales	Siphoviridae	Maenadvirus	776_1	Clustered	4	VC_776_1	4	0.3436	0.999975	0.3436	2	1	1	1
Lactobacillus~phage~PL-1	Caudovirales	Siphoviridae	Unassigned	777_0	Clustered	13	VC_777_0	13	0.4554	1	0.4554	1	2	2	0.7308
Lactobacillus~phage~SA-C12	Caudovirales	Siphoviridae	Lenusvirus	776_0	Clustered	3	VC_776_0	3	0.2826	0.998065	0.282	1	1	1	1
Lactobacillus~phage~SAC12B	Caudovirales	Herelleviridae	Unassigned	248_0	Clustered	2	VC_248_0	2	0.1155	0.95624	0.1104	1	1	1	1
Lactobacillus~phage~Satyr	Caudovirales	Siphoviridae	Maenadvirus	776_1	Clustered	4	VC_776_1	4	0.3436	0.999975	0.3436	2	1	1	1
Lactobacillus~phage~Semele	Caudovirales	Herelleviridae	Harbinvirus	222_0	Clustered	4	VC_222_0	4	0.261	0.999984	0.261	1	1	1	1
Lactobacillus~phage~T25	Caudovirales	Siphoviridae	Unassigned	777_0	Clustered	13	VC_777_0	13	0.4554	1	0.4554	1	2	2	0.7308
Lactobacillus~phage~ViSo-2018a	Caudovirales	Siphoviridae	Lidleunavirus	780_0	Clustered	2	VC_780_0	2	0.2034	0.948219	0.1929	1	1	1	1
Lactobacillus~phage~phi~jlb1	Caudovirales	Myoviridae	Unassigned	783_0	Clustered	4	VC_783_0	4	0.5991	0.999942	0.5991	1	1	1	1
Lactobacillus~phage~phiAQ113	Caudovirales	Myoviridae	Unassigned	783_0	Clustered	4	VC_783_0	4	0.5991	0.999942	0.5991	1	1	1	1
Lactobacillus~phage~phiAT3	Caudovirales	Siphoviridae	Unassigned	777_0	Clustered	13	VC_777_0	13	0.4554	1	0.4554	1	2	2	0.7308
Lactobacillus~phage~phiLdb	Caudovirales	Siphoviridae	C5virus	786_0	Clustered	6	VC_786_0	6	0.2099	1	0.2099	1	1	1	1
Lactobacillus~phage~phiPYB5	Caudovirales	Siphoviridae	Unassigned	778_0	Clustered	3	VC_778_0	3	0.1009	0.990204	0.0999	1	2	2	1
Lactobacillus~prophage~Lj771	Caudovirales	Myoviridae	Unassigned	783_0	Clustered	4	VC_783_0	4	0.5991	0.999942	0.5991	1	1	1	1
Lactobacillus~prophage~Lj965	Caudovirales	Siphoviridae	Unassigned	364_0	Clustered	16	VC_364_0	16	0.4676	1	0.4676	2	2	2	0.95
Lactobacillus~virus~ATCC8014	Caudovirales	Siphoviridae	Phijl1virus	604_0	Clustered	3	VC_604_0	3	0.6674	0.996466	0.6651	1	1	1	1
Lactobacillus~virus~LLKu	Caudovirales	Siphoviridae	C5virus	786_0	Clustered	6	VC_786_0	6	0.2099	1	0.2099	1	1	1	1
Lactobacillus~virus~LP65	Caudovirales	Myoviridae	Unassigned	222_1	Clustered	3	VC_222_1	3	0.1128	0.994714	0.1122	2	2	1	0.6667
Lactobacillus~virus~c5	Caudovirales	Siphoviridae	C5virus	786_0	Clustered	6	VC_786_0	6	0.2099	1	0.2099	1	1	1	1
Lactobacillus~virus~phiJL1	Caudovirales	Siphoviridae	Phijl1virus	604_0	Clustered	3	VC_604_0	3	0.6674	0.996466	0.6651	1	1	1	1
Lactococcus~lactis~phage~P475	Caudovirales	Siphoviridae	Skunavirus	798_0	Clustered	97	VC_798_0	97	0.9999	1	0.9999	2	1	1	1
Lactococcus~lactis~phage~p272	Caudovirales	Siphoviridae	Skunavirus	798_0	Clustered	97	VC_798_0	97	0.9999	1	0.9999	2	1	1	1
Lactococcus~phage~05601	Caudovirales	Siphoviridae	Skunavirus	798_0	Clustered	97	VC_798_0	97	0.9999	1	0.9999	2	1	1	1
Lactococcus~phage~10W18	Caudovirales	Siphoviridae	Skunavirus	798_0	Clustered	97	VC_798_0	97	0.9999	1	0.9999	2	1	1	1
Lactococcus~phage~13W11L	Caudovirales	Siphoviridae	Skunavirus	798_0	Clustered	97	VC_798_0	97	0.9999	1	0.9999	2	1	1	1
Lactococcus~phage~16802	Caudovirales	Siphoviridae	Skunavirus	798_0	Clustered	97	VC_798_0	97	0.9999	1	0.9999	2	1	1	1
Lactococcus~phage~16W23	Caudovirales	Siphoviridae	Skunavirus	798_0	Clustered	97	VC_798_0	97	0.9999	1	0.9999	2	1	1	1
Lactococcus~phage~30804	Caudovirales	Siphoviridae	Skunavirus	798_0	Clustered	97	VC_798_0	97	0.9999	1	0.9999	2	1	1	1
Lactococcus~phage~340	Caudovirales	Siphoviridae	Skunavirus	798_0	Clustered	97	VC_798_0	97	0.9999	1	0.9999	2	1	1	1
Lactococcus~phage~37201	Caudovirales	Siphoviridae	Skunavirus	798_0	Clustered	97	VC_798_0	97	0.9999	1	0.9999	2	1	1	1
Lactococcus~phage~38503	Caudovirales	Siphoviridae	Skunavirus	798_0	Clustered	97	VC_798_0	97	0.9999	1	0.9999	2	1	1	1
Lactococcus~phage~38507	Caudovirales	Siphoviridae	Skunavirus	798_0	Clustered	97	VC_798_0	97	0.9999	1	0.9999	2	1	1	1
Lactococcus~phage~3R16S	Caudovirales	Siphoviridae	Skunavirus	798_0	Clustered	97	VC_798_0	97	0.9999	1	0.9999	2	1	1	1
Lactococcus~phage~51701	Caudovirales	Siphoviridae	Skunavirus	798_0	Clustered	97	VC_798_0	97	0.9999	1	0.9999	2	1	1	1
Lactococcus~phage~56003	Caudovirales	Siphoviridae	Skunavirus	798_0	Clustered	97	VC_798_0	97	0.9999	1	0.9999	2	1	1	1
Lactococcus~phage~56301	Caudovirales	Siphoviridae	Skunavirus	798_0	Clustered	97	VC_798_0	97	0.9999	1	0.9999	2	1	1	1
Lactococcus~phage~57001	Caudovirales	Siphoviridae	Skunavirus	798_0	Clustered	97	VC_798_0	97	0.9999	1	0.9999	2	1	1	1
Lactococcus~phage~62601	Caudovirales	Siphoviridae	Skunavirus	798_0	Clustered	97	VC_798_0	97	0.9999	1	0.9999	2	1	1	1
Lactococcus~phage~62605	Caudovirales	Siphoviridae	Skunavirus	798_0	Clustered	97	VC_798_0	97	0.9999	1	0.9999	2	1	1	1
Lactococcus~phage~63302	Caudovirales	Siphoviridae	Skunavirus	798_0	Clustered	97	VC_798_0	97	0.9999	1	0.9999	2	1	1	1
Lactococcus~phage~66901	Caudovirales	Siphoviridae	Skunavirus	798_0	Clustered	97	VC_798_0	97	0.9999	1	0.9999	2	1	1	1
Lactococcus~phage~79201	Caudovirales	Siphoviridae	Skunavirus	798_0	Clustered	97	VC_798_0	97	0.9999	1	0.9999	2	1	1	1
Lactococcus~phage~88605	Caudovirales	Siphoviridae	Skunavirus	798_0	Clustered	97	VC_798_0	97	0.9999	1	0.9999	2	1	1	1
Lactococcus~phage~8V08	Caudovirales	Siphoviridae	Skunavirus	798_0	Clustered	97	VC_798_0	97	0.9999	1	0.9999	2	1	1	1
Lactococcus~phage~936	Caudovirales	Siphoviridae	Skunavirus	798_0	Clustered	97	VC_798_0	97	0.9999	1	0.9999	2	1	1	1
Lactococcus~phage~936~group~phage~Phi109	Caudovirales	Siphoviridae	Skunavirus	798_0	Clustered	97	VC_798_0	97	0.9999	1	0.9999	2	1	1	1
Lactococcus~phage~936~group~phage~Phi155	Caudovirales	Siphoviridae	Skunavirus	798_0	Clustered	97	VC_798_0	97	0.9999	1	0.9999	2	1	1	1
Lactococcus~phage~936~group~phage~Phi19.3	Caudovirales	Siphoviridae	Skunavirus	798_0	Clustered	97	VC_798_0	97	0.9999	1	0.9999	2	1	1	1
Lactococcus~phage~936~group~phage~Phi4.2	Caudovirales	Siphoviridae	Skunavirus	798_0	Clustered	97	VC_798_0	97	0.9999	1	0.9999	2	1	1	1
Lactococcus~phage~936~group~phage~Phi44	Caudovirales	Siphoviridae	Skunavirus	798_0	Clustered	97	VC_798_0	97	0.9999	1	0.9999	2	1	1	1
Lactococcus~phage~936~group~phage~Phi5.12	Caudovirales	Siphoviridae	Skunavirus	798_0	Clustered	97	VC_798_0	97	0.9999	1	0.9999	2	1	1	1
Lactococcus~phage~936~group~phage~Phi91127	Caudovirales	Siphoviridae	Skunavirus	798_0	Clustered	97	VC_798_0	97	0.9999	1	0.9999	2	1	1	1
Lactococcus~phage~936~group~phage~PhiA.16	Caudovirales	Siphoviridae	Skunavirus	798_0	Clustered	97	VC_798_0	97	0.9999	1	0.9999	2	1	1	1
Lactococcus~phage~936~group~phage~PhiB1127	Caudovirales	Siphoviridae	Skunavirus	798_0	Clustered	97	VC_798_0	97	0.9999	1	0.9999	2	1	1	1
Lactococcus~phage~936~group~phage~PhiE1127	Caudovirales	Siphoviridae	Skunavirus	798_0	Clustered	97	VC_798_0	97	0.9999	1	0.9999	2	1	1	1
Lactococcus~phage~936~group~phage~PhiF0139	Caudovirales	Siphoviridae	Skunavirus	798_0	Clustered	97	VC_798_0	97	0.9999	1	0.9999	2	1	1	1
Lactococcus~phage~936~group~phage~PhiJF1	Caudovirales	Siphoviridae	Skunavirus	798_0	Clustered	97	VC_798_0	97	0.9999	1	0.9999	2	1	1	1
Lactococcus~phage~936~group~phage~PhiL.18	Caudovirales	Siphoviridae	Skunavirus	798_0	Clustered	97	VC_798_0	97	0.9999	1	0.9999	2	1	1	1
Lactococcus~phage~936~group~phage~PhiL.6	Caudovirales	Siphoviridae	Skunavirus	798_0	Clustered	97	VC_798_0	97	0.9999	1	0.9999	2	1	1	1
Lactococcus~phage~936~group~phage~PhiLj	Caudovirales	Siphoviridae	Skunavirus	798_0	Clustered	97	VC_798_0	97	0.9999	1	0.9999	2	1	1	1
Lactococcus~phage~936~group~phage~PhiM1127	Caudovirales	Siphoviridae	Skunavirus	798_0	Clustered	97	VC_798_0	97	0.9999	1	0.9999	2	1	1	1
Lactococcus~phage~936~group~phage~PhiS0139	Caudovirales	Siphoviridae	Skunavirus	798_0	Clustered	97	VC_798_0	97	0.9999	1	0.9999	2	1	1	1
Lactococcus~phage~949	Caudovirales	Siphoviridae	Unassigned	306_0	Clustered	3	VC_306_0	3	0.8183	0.996348	0.8153	1	1	1	1
Lactococcus~phage~96401	Caudovirales	Siphoviridae	Skunavirus	798_0	Clustered	97	VC_798_0	97	0.9999	1	0.9999	2	1	1	1
Lactococcus~phage~96403	Caudovirales	Siphoviridae	Skunavirus	798_0	Clustered	97	VC_798_0	97	0.9999	1	0.9999	2	1	1	1
Lactococcus~phage~96603	Caudovirales	Siphoviridae	Skunavirus	798_0	Clustered	97	VC_798_0	97	0.9999	1	0.9999	2	1	1	1
Lactococcus~phage~CHPC129	Caudovirales	Siphoviridae	Skunavirus	798_0	Clustered	97	VC_798_0	97	0.9999	1	0.9999	2	1	1	1
Lactococcus~phage~CHPC361	Caudovirales	Siphoviridae	Skunavirus	798_0	Clustered	97	VC_798_0	97	0.9999	1	0.9999	2	1	1	1
Lactococcus~phage~CHPC362	Caudovirales	Siphoviridae	Skunavirus	798_0	Clustered	97	VC_798_0	97	0.9999	1	0.9999	2	1	1	1
Lactococcus~phage~CHPC52	Caudovirales	Siphoviridae	Skunavirus	798_0	Clustered	97	VC_798_0	97	0.9999	1	0.9999	2	1	1	1
Lactococcus~phage~CHPC781	Caudovirales	Siphoviridae	Skunavirus	798_0	Clustered	97	VC_798_0	97	0.9999	1	0.9999	2	1	1	1
Lactococcus~phage~CHPC958	Caudovirales	Siphoviridae	Skunavirus	798_0	Clustered	97	VC_798_0	97	0.9999	1	0.9999	2	1	1	1
Lactococcus~phage~CHPC959	Caudovirales	Siphoviridae	Skunavirus	798_0	Clustered	97	VC_798_0	97	0.9999	1	0.9999	2	1	1	1
Lactococcus~phage~CHPC964	Caudovirales	Siphoviridae	Skunavirus	798_0	Clustered	97	VC_798_0	97	0.9999	1	0.9999	2	1	1	1
Lactococcus~phage~CHPC965	Caudovirales	Siphoviridae	Skunavirus	798_0	Clustered	97	VC_798_0	97	0.9999	1	0.9999	2	1	1	1
Lactococcus~phage~CaseusJM1	Caudovirales	Siphoviridae	Skunavirus	798_0	Clustered	97	VC_798_0	97	0.9999	1	0.9999	2	1	1	1
Lactococcus~phage~D4410	Caudovirales	Siphoviridae	Ceduovirus	809_0	Clustered	7	VC_809_0	7	0.9582	1	0.9582	2	1	1	1
Lactococcus~phage~D4412	Caudovirales	Siphoviridae	Ceduovirus	809_0	Clustered	7	VC_809_0	7	0.9582	1	0.9582	2	1	1	1
Lactococcus~phage~GE1	Caudovirales	Siphoviridae	Unassigned	799_0	Clustered	2	VC_799_0	2	0.0245	0.771292	0.0189	1	1	1	1
Lactococcus~phage~LP0209	Caudovirales	Siphoviridae	Skunavirus	798_0	Clustered	97	VC_798_0	97	0.9999	1	0.9999	2	1	1	1
Lactococcus~phage~LP0903	Caudovirales	Siphoviridae	Skunavirus	798_0	Clustered	97	VC_798_0	97	0.9999	1	0.9999	2	1	1	1
Lactococcus~phage~LP1502a	Caudovirales	Siphoviridae	Skunavirus	798_0	Clustered	97	VC_798_0	97	0.9999	1	0.9999	2	1	1	1
Lactococcus~phage~LP8511	Caudovirales	Siphoviridae	Skunavirus	798_0	Clustered	97	VC_798_0	97	0.9999	1	0.9999	2	1	1	1
Lactococcus~phage~LP9207	Caudovirales	Siphoviridae	Skunavirus	798_0	Clustered	97	VC_798_0	97	0.9999	1	0.9999	2	1	1	1
Lactococcus~phage~LP9404	Caudovirales	Siphoviridae	Skunavirus	798_0	Clustered	97	VC_798_0	97	0.9999	1	0.9999	2	1	1	1
Lactococcus~phage~LP9609	Caudovirales	Siphoviridae	Skunavirus	798_0	Clustered	97	VC_798_0	97	0.9999	1	0.9999	2	1	1	1
Lactococcus~phage~LP9903	Caudovirales	Siphoviridae	Skunavirus	798_0	Clustered	97	VC_798_0	97	0.9999	1	0.9999	2	1	1	1
Lactococcus~phage~LP9908	Caudovirales	Siphoviridae	Skunavirus	798_0	Clustered	97	VC_798_0	97	0.9999	1	0.9999	2	1	1	1
Lactococcus~phage~M5938	Caudovirales	Siphoviridae	Ceduovirus	809_0	Clustered	7	VC_809_0	7	0.9582	1	0.9582	2	1	1	1
Lactococcus~phage~M6162	Caudovirales	Siphoviridae	Ceduovirus	809_0	Clustered	7	VC_809_0	7	0.9582	1	0.9582	2	1	1	1
Lactococcus~phage~M6165	Caudovirales	Siphoviridae	Ceduovirus	809_0	Clustered	7	VC_809_0	7	0.9582	1	0.9582	2	1	1	1
Lactococcus~phage~MP1	Caudovirales	Siphoviridae	Skunavirus	798_0	Clustered	97	VC_798_0	97	0.9999	1	0.9999	2	1	1	1
Lactococcus~phage~MV10L	Caudovirales	Siphoviridae	Skunavirus	798_0	Clustered	97	VC_798_0	97	0.9999	1	0.9999	2	1	1	1
Lactococcus~phage~P078	Caudovirales	Siphoviridae	Unassigned	166_0	Clustered	4	VC_166_0	4	0.5392	0.999986	0.5392	1	1	1	1
Lactococcus~phage~P087	Caudovirales	Siphoviridae	Unassigned	810_0	Clustered	2	VC_810_0	2	0.714	0.729854	0.5211	1	2	2	1
Lactococcus~phage~P092	Caudovirales	Siphoviridae	Unassigned	166_0	Clustered	4	VC_166_0	4	0.5392	0.999986	0.5392	1	1	1	1
Lactococcus~phage~P118	Caudovirales	Siphoviridae	Unassigned	166_0	Clustered	4	VC_166_0	4	0.5392	0.999986	0.5392	1	1	1	1
Lactococcus~phage~P1532	Caudovirales	Siphoviridae	Skunavirus	798_0	Clustered	97	VC_798_0	97	0.9999	1	0.9999	2	1	1	1
Lactococcus~phage~P162	Caudovirales	Siphoviridae	Unassigned	166_0	Clustered	4	VC_166_0	4	0.5392	0.999986	0.5392	1	1	1	1
Lactococcus~phage~P4565	Caudovirales	Siphoviridae	Skunavirus	798_0	Clustered	97	VC_798_0	97	0.9999	1	0.9999	2	1	1	1
Lactococcus~phage~P656	Caudovirales	Siphoviridae	Skunavirus	798_0	Clustered	97	VC_798_0	97	0.9999	1	0.9999	2	1	1	1
Lactococcus~phage~P680	Caudovirales	Siphoviridae	Skunavirus	798_0	Clustered	97	VC_798_0	97	0.9999	1	0.9999	2	1	1	1
Lactococcus~phage~PLgT-1	Caudovirales	Siphoviridae	Unassigned	364_0	Clustered	16	VC_364_0	16	0.4676	1	0.4676	2	2	2	0.95
Lactococcus~phage~Q54	Caudovirales	Siphoviridae	Unassigned	799_0	Clustered	2	VC_799_0	2	0.0245	0.771292	0.0189	1	1	1	1
Lactococcus~phage~R31	Caudovirales	Siphoviridae	Skunavirus	798_0	Clustered	97	VC_798_0	97	0.9999	1	0.9999	2	1	1	1
Lactococcus~phage~WP-2	Caudovirales	Podoviridae	Negarvirus	607_0	Clustered	4	VC_607_0	4	0.191	0.99997	0.191	3	1	1	1
Lactococcus~phage~WRP3	Caudovirales	Siphoviridae	Unassigned	306_0	Clustered	3	VC_306_0	3	0.8183	0.996348	0.8153	1	1	1	1
Lactococcus~phage~bIL310	Caudovirales	Siphoviridae	Unassigned	811_0	Clustered	2	VC_811_0	2	0.8444	0.5	0.4222	1	1	1	1
Lactococcus~phage~bIL312	Caudovirales	Siphoviridae	Unassigned	811_0	Clustered	2	VC_811_0	2	0.8444	0.5	0.4222	1	1	1	1
Lactococcus~phage~fd13	Caudovirales	Siphoviridae	Skunavirus	798_0	Clustered	97	VC_798_0	97	0.9999	1	0.9999	2	1	1	1
Lactococcus~phage~i0139	Caudovirales	Siphoviridae	Skunavirus	798_0	Clustered	97	VC_798_0	97	0.9999	1	0.9999	2	1	1	1
Lactococcus~phage~jm2	Caudovirales	Siphoviridae	Skunavirus	798_0	Clustered	97	VC_798_0	97	0.9999	1	0.9999	2	1	1	1
Lactococcus~phage~jm3	Caudovirales	Siphoviridae	Skunavirus	798_0	Clustered	97	VC_798_0	97	0.9999	1	0.9999	2	1	1	1
Lactococcus~phage~phi145	Caudovirales	Siphoviridae	Skunavirus	798_0	Clustered	97	VC_798_0	97	0.9999	1	0.9999	2	1	1	1
Lactococcus~phage~phi15	Caudovirales	Siphoviridae	Skunavirus	798_0	Clustered	97	VC_798_0	97	0.9999	1	0.9999	2	1	1	1
Lactococcus~phage~phi7	Caudovirales	Siphoviridae	Skunavirus	798_0	Clustered	97	VC_798_0	97	0.9999	1	0.9999	2	1	1	1
Lactococcus~phage~phiL47	Caudovirales	Siphoviridae	Unassigned	306_0	Clustered	3	VC_306_0	3	0.8183	0.996348	0.8153	1	1	1	1
Lactococcus~phage~vB_Llc_bIBB5g1	Caudovirales	Siphoviridae	Skunavirus	798_0	Clustered	97	VC_798_0	97	0.9999	1	0.9999	2	1	1	1
Lactococcus~phage~vB_Llc_bIBBF12	Caudovirales	Siphoviridae	Skunavirus	798_0	Clustered	97	VC_798_0	97	0.9999	1	0.9999	2	1	1	1
Lactococcus~virus~712	Caudovirales	Siphoviridae	Sk1virus	798_0	Clustered	97	VC_798_0	97	0.9999	1	0.9999	2	1	1	1
Lactococcus~virus~ASCC191	Caudovirales	Siphoviridae	Sk1virus	798_0	Clustered	97	VC_798_0	97	0.9999	1	0.9999	2	1	1	1
Lactococcus~virus~ASCC273	Caudovirales	Siphoviridae	Sk1virus	798_0	Clustered	97	VC_798_0	97	0.9999	1	0.9999	2	1	1	1
Lactococcus~virus~ASCC281	Caudovirales	Siphoviridae	Sk1virus	798_0	Clustered	97	VC_798_0	97	0.9999	1	0.9999	2	1	1	1
Lactococcus~virus~ASCC465	Caudovirales	Siphoviridae	Sk1virus	798_0	Clustered	97	VC_798_0	97	0.9999	1	0.9999	2	1	1	1
Lactococcus~virus~ASCC532	Caudovirales	Siphoviridae	Sk1virus	798_0	Clustered	97	VC_798_0	97	0.9999	1	0.9999	2	1	1	1
Lactococcus~virus~Bibb29	Caudovirales	Siphoviridae	Sk1virus	798_0	Clustered	97	VC_798_0	97	0.9999	1	0.9999	2	1	1	1
Lactococcus~virus~CB13	Caudovirales	Siphoviridae	Sk1virus	798_0	Clustered	97	VC_798_0	97	0.9999	1	0.9999	2	1	1	1
Lactococcus~virus~CB14	Caudovirales	Siphoviridae	Sk1virus	798_0	Clustered	97	VC_798_0	97	0.9999	1	0.9999	2	1	1	1
Lactococcus~virus~CB19	Caudovirales	Siphoviridae	Sk1virus	798_0	Clustered	97	VC_798_0	97	0.9999	1	0.9999	2	1	1	1
Lactococcus~virus~CB20	Caudovirales	Siphoviridae	Sk1virus	798_0	Clustered	97	VC_798_0	97	0.9999	1	0.9999	2	1	1	1
Lactococcus~virus~P008	Caudovirales	Siphoviridae	Sk1virus	798_0	Clustered	97	VC_798_0	97	0.9999	1	0.9999	2	1	1	1
Lactococcus~virus~P2	Caudovirales	Siphoviridae	Sk1virus	798_0	Clustered	97	VC_798_0	97	0.9999	1	0.9999	2	1	1	1
Lactococcus~virus~Sl4	Caudovirales	Siphoviridae	Sk1virus	798_0	Clustered	97	VC_798_0	97	0.9999	1	0.9999	2	1	1	1
Lactococcus~virus~bIL170	Caudovirales	Siphoviridae	Sk1virus	798_0	Clustered	97	VC_798_0	97	0.9999	1	0.9999	2	1	1	1
Lactococcus~virus~bIL67	Caudovirales	Siphoviridae	C2virus	809_0	Clustered	7	VC_809_0	7	0.9582	1	0.9582	2	1	1	1
Lactococcus~virus~c2	Caudovirales	Siphoviridae	C2virus	809_0	Clustered	7	VC_809_0	7	0.9582	1	0.9582	2	1	1	1
Lactococcus~virus~jj50	Caudovirales	Siphoviridae	Sk1virus	798_0	Clustered	97	VC_798_0	97	0.9999	1	0.9999	2	1	1	1
Lactococcus~virus~sk1	Caudovirales	Siphoviridae	Sk1virus	798_0	Clustered	97	VC_798_0	97	0.9999	1	0.9999	2	1	1	1
Leclercia~phage~10164-302	Caudovirales	Autographiviridae	Teetrevirus	424_0	Clustered	59	VC_424_0	59	0.7461	1	0.7461	11	2	1	1
Lelliottia~phage~phD2B	Caudovirales	Autographiviridae	Tuodvirus	437_0	Clustered	23	VC_437_0	23	0.7035	1	0.7035	7	2	1	1
Lentibacter~virus~vB_LenP_ICBM1	Caudovirales	Podoviridae	Unassigned	403_0	Clustered	4	VC_403_0	4	0.669	0.999954	0.6689	1	1	1	1
Lentibacter~virus~vB_LenP_ICBM2	Caudovirales	Podoviridae	Unassigned	403_0	Clustered	4	VC_403_0	4	0.669	0.999954	0.6689	1	1	1	1
Leptospira~phage~LE3	Caudovirales	Myoviridae	Unassigned	812_0	Clustered	2	VC_812_0	2	0.9932	0.5	0.4966	1	1	1	1
Leptospira~phage~LE4	Caudovirales	Myoviridae	Unassigned	812_0	Clustered	2	VC_812_0	2	0.9932	0.5	0.4966	1	1	1	1
Leuconostoc~phage~1-A4	Caudovirales	Siphoviridae	Una4virus	814_0	Clustered	7	VC_814_0	7	0.6422	1	0.6422	2	1	1	1
Leuconostoc~phage~Lmd1	Caudovirales	Siphoviridae	Lmd1virus	813_0	Clustered	6	VC_813_0	6	0.5852	1	0.5852	1	1	1	1
Leuconostoc~phage~Ln-8	Caudovirales	Siphoviridae	Una4virus	814_0	Clustered	7	VC_814_0	7	0.6422	1	0.6422	2	1	1	1
Leuconostoc~phage~Ln-9	Caudovirales	Siphoviridae	Una4virus	814_0	Clustered	7	VC_814_0	7	0.6422	1	0.6422	2	1	1	1
Leuconostoc~phage~P793	Caudovirales	Siphoviridae	Lmd1virus	813_0	Clustered	6	VC_813_0	6	0.5852	1	0.5852	1	1	1	1
Leuconostoc~phage~phiLN03	Caudovirales	Siphoviridae	Lmd1virus	813_0	Clustered	6	VC_813_0	6	0.5852	1	0.5852	1	1	1	1
Leuconostoc~phage~phiLN04	Caudovirales	Siphoviridae	Lmd1virus	813_0	Clustered	6	VC_813_0	6	0.5852	1	0.5852	1	1	1	1
Leuconostoc~phage~phiLN12	Caudovirales	Siphoviridae	Lmd1virus	813_0	Clustered	6	VC_813_0	6	0.5852	1	0.5852	1	1	1	1
Leuconostoc~phage~phiLN25	Caudovirales	Siphoviridae	Una4virus	814_0	Clustered	7	VC_814_0	7	0.6422	1	0.6422	2	1	1	1
Leuconostoc~phage~phiLN34	Caudovirales	Siphoviridae	Una4virus	814_0	Clustered	7	VC_814_0	7	0.6422	1	0.6422	2	1	1	1
Leuconostoc~phage~phiLN6B	Caudovirales	Siphoviridae	Lmd1virus	813_0	Clustered	6	VC_813_0	6	0.5852	1	0.5852	1	1	1	1
Leuconostoc~phage~phiLNTR2	Caudovirales	Siphoviridae	Unaquatrovirus	814_0	Clustered	7	VC_814_0	7	0.6422	1	0.6422	2	1	1	1
Leuconostoc~phage~phiLNTR3	Caudovirales	Siphoviridae	Una4virus	814_0	Clustered	7	VC_814_0	7	0.6422	1	0.6422	2	1	1	1
Li_JH_2014_NBT_MH0315_101102.NODE_138753_269	Unassigned	Unassigned	Unassigned	815_0	Clustered	2	VC_815_0	2	0.6041	0.5	0.3021	1	1	1	1
Li_JH_2014_NBT_V1.FI04_110822.NODE_466216_6511	Unassigned	Unassigned	Unassigned	688_0	Clustered	6	VC_688_0	6	0.1521	1	0.1521	1	1	1	1
Liberibacter~phage~SC1	Caudovirales	Podoviridae	Unassigned	358_0	Clustered	2	VC_358_0	2	0.4774	0.944686	0.451	1	1	1	1
Liberibacter~phage~SC2	Caudovirales	Podoviridae	Unassigned	358_0	Clustered	2	VC_358_0	2	0.4774	0.944686	0.451	1	1	1	1
Listeria~phage~A006	Caudovirales	Siphoviridae	Unassigned	232_1	Clustered	2	VC_232_1	2	0.1365	0.747982	0.1021	1	1	1	1
Listeria~phage~A118	Caudovirales	Siphoviridae	Unassigned	232_0	Clustered	4	VC_232_0	4	0.5319	0.99996	0.5319	1	1	1	1
Listeria~phage~A500	Caudovirales	Siphoviridae	Unassigned	232_0	Clustered	4	VC_232_0	4	0.5319	0.99996	0.5319	1	1	1	1
Listeria~phage~B025	Caudovirales	Siphoviridae	Psavirus	308_0	Clustered	4	VC_308_0	4	0.439	0.999981	0.439	1	1	1	1
Listeria~phage~LMSP-25	Caudovirales	Herelleviridae	Pecentumvirus	251_0	Clustered	14	VC_251_0	14	0.6438	1	0.6438	2	2	1	1
Listeria~phage~LMTA-148	Caudovirales	Herelleviridae	Pecentumvirus	251_0	Clustered	14	VC_251_0	14	0.6438	1	0.6438	2	2	1	1
Listeria~phage~LMTA-34	Caudovirales	Herelleviridae	Pecentumvirus	251_0	Clustered	14	VC_251_0	14	0.6438	1	0.6438	2	2	1	1
Listeria~phage~LMTA-57	Caudovirales	Herelleviridae	Pecentumvirus	251_0	Clustered	14	VC_251_0	14	0.6438	1	0.6438	2	2	1	1
Listeria~phage~LMTA-94	Caudovirales	Herelleviridae	Pecentumvirus	251_0	Clustered	14	VC_251_0	14	0.6438	1	0.6438	2	2	1	1
Listeria~phage~LP-026	Caudovirales	Siphoviridae	P70virus	285_0	Clustered	5	VC_285_0	5	0.8854	1	0.8854	1	1	1	1
Listeria~phage~LP-030-2	Caudovirales	Siphoviridae	Psavirus	308_0	Clustered	4	VC_308_0	4	0.439	0.999981	0.439	1	1	1	1
Listeria~phage~LP-030-3	Caudovirales	Siphoviridae	Unassigned	232_0	Clustered	4	VC_232_0	4	0.5319	0.99996	0.5319	1	1	1	1
Listeria~phage~LP-037	Caudovirales	Siphoviridae	P70virus	285_0	Clustered	5	VC_285_0	5	0.8854	1	0.8854	1	1	1	1
Listeria~phage~LP-048	Caudovirales	Herelleviridae	Pecentumvirus	251_0	Clustered	14	VC_251_0	14	0.6438	1	0.6438	2	2	1	1
Listeria~phage~LP-064	Caudovirales	Herelleviridae	Pecentumvirus	251_0	Clustered	14	VC_251_0	14	0.6438	1	0.6438	2	2	1	1
Listeria~phage~LP-083-2	Caudovirales	Herelleviridae	Pecentumvirus	251_0	Clustered	14	VC_251_0	14	0.6438	1	0.6438	2	2	1	1
Listeria~phage~LP-101	Caudovirales	Siphoviridae	Psavirus	308_0	Clustered	4	VC_308_0	4	0.439	0.999981	0.439	1	1	1	1
Listeria~phage~LP-110	Caudovirales	Siphoviridae	P70virus	285_0	Clustered	5	VC_285_0	5	0.8854	1	0.8854	1	1	1	1
Listeria~phage~LP-114	Caudovirales	Siphoviridae	P70virus	285_0	Clustered	5	VC_285_0	5	0.8854	1	0.8854	1	1	1	1
Listeria~phage~LP-124	Caudovirales	Herelleviridae	Pecentumvirus	251_0	Clustered	14	VC_251_0	14	0.6438	1	0.6438	2	2	1	1
Listeria~phage~LP-125	Caudovirales	Herelleviridae	Pecentumvirus	251_0	Clustered	14	VC_251_0	14	0.6438	1	0.6438	2	2	1	1
Listeria~phage~List-36	Caudovirales	Herelleviridae	Pecentumvirus	251_0	Clustered	14	VC_251_0	14	0.6438	1	0.6438	2	2	1	1
Listeria~phage~P35	Caudovirales	Siphoviridae	Unassigned	239_0	Clustered	2	VC_239_0	2	0.3864	0.945304	0.3653	1	1	1	1
Listeria~phage~P40	Caudovirales	Siphoviridae	Unassigned	239_0	Clustered	2	VC_239_0	2	0.3864	0.945304	0.3653	1	1	1	1
Listeria~phage~P70	Caudovirales	Siphoviridae	P70virus	285_0	Clustered	5	VC_285_0	5	0.8854	1	0.8854	1	1	1	1
Listeria~phage~PSA	Caudovirales	Siphoviridae	Psavirus	308_0	Clustered	4	VC_308_0	4	0.439	0.999981	0.439	1	1	1	1
Listeria~phage~vB_LmoM_AG20	Caudovirales	Herelleviridae	Pecentumvirus	251_0	Clustered	14	VC_251_0	14	0.6438	1	0.6438	2	2	1	1
Listeria~phage~vB_LmoS_188	Caudovirales	Siphoviridae	Unassigned	232_1	Clustered	2	VC_232_1	2	0.1365	0.747982	0.1021	1	1	1	1
Listeria~phage~vB_LmoS_293	Caudovirales	Siphoviridae	Unassigned	232_0	Clustered	4	VC_232_0	4	0.5319	0.99996	0.5319	1	1	1	1
Listeria~virus~A511	Caudovirales	Myoviridae	P100virus	251_0	Clustered	14	VC_251_0	14	0.6438	1	0.6438	2	2	1	1
Listeria~virus~P100	Caudovirales	Myoviridae	P100virus	251_0	Clustered	14	VC_251_0	14	0.6438	1	0.6438	2	2	1	1
Loktanella~phage~pCB2051-A	Caudovirales	Siphoviridae	Unassigned	23_0	Clustered	6	VC_23_0	6	0.1077	0.96498	0.1039	3	2	2	1
MGV-GENOME-0001010	Unassigned	Unassigned	Unassigned	817_0	Clustered	4	VC_817_0	4	0.75	0	0	1	1	1	1
MGV-GENOME-0001201	Unassigned	Unassigned	Unassigned	771_0	Clustered	8	VC_771_0	8	0.9774	0.920037	0.8992	1	1	1	1
MGV-GENOME-0001384	Unassigned	Unassigned	Unassigned	817_0	Clustered	4	VC_817_0	4	0.75	0	0	1	1	1	1
MGV-GENOME-0001508	Unassigned	Unassigned	Unassigned	818_0	Clustered	2	VC_818_0	2	0.8375	0.5	0.4188	1	1	1	1
MGV-GENOME-0001514	Unassigned	Unassigned	Unassigned	817_0	Clustered	4	VC_817_0	4	0.75	0	0	1	1	1	1
MGV-GENOME-0012232	Unassigned	Unassigned	Unassigned	819_0	Clustered	2	VC_819_0	2	1	1	1	1	1	1	1
MGV-GENOME-0012666	Unassigned	Unassigned	Unassigned	820_0	Clustered	3	VC_820_0	3	0.473	0.990241	0.4684	1	1	1	1
MGV-GENOME-0012721	Unassigned	Unassigned	Unassigned	820_0	Clustered	3	VC_820_0	3	0.473	0.990241	0.4684	1	1	1	1
MGV-GENOME-0045410	Unassigned	Unassigned	Unassigned	821_0	Clustered	2	VC_821_0	2	0.87	0.5	0.435	1	1	1	1
MGV-GENOME-0046188	Unassigned	Unassigned	Unassigned	62_0	Clustered	4	VC_62_0	4	0.2775	0.999984	0.2774	1	1	1	1
MGV-GENOME-0050488	Unassigned	Unassigned	Unassigned	62_0	Clustered	4	VC_62_0	4	0.2775	0.999984	0.2774	1	1	1	1
MGV-GENOME-0051210	Unassigned	Unassigned	Unassigned	62_0	Clustered	4	VC_62_0	4	0.2775	0.999984	0.2774	1	1	1	1
MGV-GENOME-0051252	Unassigned	Unassigned	Unassigned	62_0	Clustered	4	VC_62_0	4	0.2775	0.999984	0.2774	1	1	1	1
MGV-GENOME-0057307	Unassigned	Unassigned	Unassigned	453_0	Clustered	6	VC_453_0	6	0.404	1	0.404	1	2	2	1
MGV-GENOME-0059067	Unassigned	Unassigned	Unassigned	354_0	Clustered	7	VC_354_0	7	0.4983	1	0.4983	1	1	1	1
MGV-GENOME-0063365	Unassigned	Unassigned	Unassigned	63_0	Clustered	8	VC_63_0	8	0.4046	1	0.4046	1	1	1	1
MGV-GENOME-0064924	Unassigned	Unassigned	Unassigned	823_0	Clustered	9	VC_823_0	9	0.9202	1	0.9202	1	1	1	1
MGV-GENOME-0065293	Unassigned	Unassigned	Unassigned	823_0	Clustered	9	VC_823_0	9	0.9202	1	0.9202	1	1	1	1
MGV-GENOME-0068925	Unassigned	Unassigned	Unassigned	64_0	Clustered	5	VC_64_0	5	0.1954	1	0.1954	1	1	1	1
MGV-GENOME-0069082	Unassigned	Unassigned	Unassigned	64_0	Clustered	5	VC_64_0	5	0.1954	1	0.1954	1	1	1	1
MGV-GENOME-0069837	Unassigned	Unassigned	Unassigned	355_0	Clustered	12	VC_355_0	12	0.6317	1	0.6317	1	1	1	1
MGV-GENOME-0071410	Unassigned	Unassigned	Unassigned	355_0	Clustered	12	VC_355_0	12	0.6317	1	0.6317	1	1	1	1
MGV-GENOME-0071497	Unassigned	Unassigned	Unassigned	355_0	Clustered	12	VC_355_0	12	0.6317	1	0.6317	1	1	1	1
MGV-GENOME-0072388	Unassigned	Unassigned	Unassigned	825_0	Clustered	8	VC_825_0	8	0.809	1	0.809	1	1	1	1
MGV-GENOME-0073140	Unassigned	Unassigned	Unassigned	355_0	Clustered	12	VC_355_0	12	0.6317	1	0.6317	1	1	1	1
MGV-GENOME-0073342	Unassigned	Unassigned	Unassigned	355_0	Clustered	12	VC_355_0	12	0.6317	1	0.6317	1	1	1	1
MGV-GENOME-0073661	Unassigned	Unassigned	Unassigned	355_0	Clustered	12	VC_355_0	12	0.6317	1	0.6317	1	1	1	1
MGV-GENOME-0073680	Unassigned	Unassigned	Unassigned	355_0	Clustered	12	VC_355_0	12	0.6317	1	0.6317	1	1	1	1
MGV-GENOME-0074194	Unassigned	Unassigned	Unassigned	355_0	Clustered	12	VC_355_0	12	0.6317	1	0.6317	1	1	1	1
MGV-GENOME-0074461	Unassigned	Unassigned	Unassigned	355_0	Clustered	12	VC_355_0	12	0.6317	1	0.6317	1	1	1	1
MGV-GENOME-0074470	Unassigned	Unassigned	Unassigned	355_0	Clustered	12	VC_355_0	12	0.6317	1	0.6317	1	1	1	1
MGV-GENOME-0074729	Unassigned	Unassigned	Unassigned	355_0	Clustered	12	VC_355_0	12	0.6317	1	0.6317	1	1	1	1
MGV-GENOME-0075615	Unassigned	Unassigned	Unassigned	355_0	Clustered	12	VC_355_0	12	0.6317	1	0.6317	1	1	1	1
MGV-GENOME-0076201	Unassigned	Unassigned	Unassigned	354_0	Clustered	7	VC_354_0	7	0.4983	1	0.4983	1	1	1	1
MGV-GENOME-0079228	Unassigned	Unassigned	Unassigned	354_0	Clustered	7	VC_354_0	7	0.4983	1	0.4983	1	1	1	1
MGV-GENOME-0079603	Unassigned	Unassigned	Unassigned	354_0	Clustered	7	VC_354_0	7	0.4983	1	0.4983	1	1	1	1
MGV-GENOME-0079661	Unassigned	Unassigned	Unassigned	63_0	Clustered	8	VC_63_0	8	0.4046	1	0.4046	1	1	1	1
MGV-GENOME-0079863	Unassigned	Unassigned	Unassigned	354_0	Clustered	7	VC_354_0	7	0.4983	1	0.4983	1	1	1	1
MGV-GENOME-0079988	Unassigned	Unassigned	Unassigned	828_0	Clustered	3	VC_828_0	3	0.9827	0.925543	0.9095	1	1	1	1
MGV-GENOME-0079995	Unassigned	Unassigned	Unassigned	354_0	Clustered	7	VC_354_0	7	0.4983	1	0.4983	1	1	1	1
MGV-GENOME-0080496	Unassigned	Unassigned	Unassigned	354_0	Clustered	7	VC_354_0	7	0.4983	1	0.4983	1	1	1	1
MGV-GENOME-0080656	Unassigned	Unassigned	Unassigned	63_0	Clustered	8	VC_63_0	8	0.4046	1	0.4046	1	1	1	1
MGV-GENOME-0081835	Unassigned	Unassigned	Unassigned	63_0	Clustered	8	VC_63_0	8	0.4046	1	0.4046	1	1	1	1
MGV-GENOME-0081952	Unassigned	Unassigned	Unassigned	828_0	Clustered	3	VC_828_0	3	0.9827	0.925543	0.9095	1	1	1	1
MGV-GENOME-0082482	Unassigned	Unassigned	Unassigned	67_0	Clustered	10	VC_67_0	10	0.5931	1	0.5931	1	1	1	1
MGV-GENOME-0082486	Unassigned	Unassigned	Unassigned	829_0	Clustered	9	VC_829_0	9	0.9711	1	0.9711	1	1	1	1
MGV-GENOME-0082862	Unassigned	Unassigned	Unassigned	63_0	Clustered	8	VC_63_0	8	0.4046	1	0.4046	1	1	1	1
MGV-GENOME-0084073	Unassigned	Unassigned	Unassigned	65_0	Clustered	5	VC_65_0	5	0.0778	0.999999	0.0778	1	1	1	1
MGV-GENOME-0084184	Unassigned	Unassigned	Unassigned	65_0	Clustered	5	VC_65_0	5	0.0778	0.999999	0.0778	1	1	1	1
MGV-GENOME-0084545	Unassigned	Unassigned	Unassigned	63_0	Clustered	8	VC_63_0	8	0.4046	1	0.4046	1	1	1	1
MGV-GENOME-0084993	Unassigned	Unassigned	Unassigned	66_0	Clustered	8	VC_66_0	8	0.372	1	0.372	1	1	1	1
MGV-GENOME-0085272	Unassigned	Unassigned	Unassigned	829_0	Clustered	9	VC_829_0	9	0.9711	1	0.9711	1	1	1	1
MGV-GENOME-0086307	Unassigned	Unassigned	Unassigned	66_0	Clustered	8	VC_66_0	8	0.372	1	0.372	1	1	1	1
MGV-GENOME-0086319	Unassigned	Unassigned	Unassigned	67_0	Clustered	10	VC_67_0	10	0.5931	1	0.5931	1	1	1	1
MGV-GENOME-0086471	Unassigned	Unassigned	Unassigned	65_0	Clustered	5	VC_65_0	5	0.0778	0.999999	0.0778	1	1	1	1
MGV-GENOME-0086730	Unassigned	Unassigned	Unassigned	63_0	Clustered	8	VC_63_0	8	0.4046	1	0.4046	1	1	1	1
MGV-GENOME-0086922	Unassigned	Unassigned	Unassigned	63_0	Clustered	8	VC_63_0	8	0.4046	1	0.4046	1	1	1	1
MGV-GENOME-0087433	Unassigned	Unassigned	Unassigned	66_0	Clustered	8	VC_66_0	8	0.372	1	0.372	1	1	1	1
MGV-GENOME-0088094	Unassigned	Unassigned	Unassigned	66_0	Clustered	8	VC_66_0	8	0.372	1	0.372	1	1	1	1
MGV-GENOME-0088509	Unassigned	Unassigned	Unassigned	66_0	Clustered	8	VC_66_0	8	0.372	1	0.372	1	1	1	1
MGV-GENOME-0088861	Unassigned	Unassigned	Unassigned	66_0	Clustered	8	VC_66_0	8	0.372	1	0.372	1	1	1	1
MGV-GENOME-0088927	Unassigned	Unassigned	Unassigned	66_0	Clustered	8	VC_66_0	8	0.372	1	0.372	1	1	1	1
MGV-GENOME-0090505	Unassigned	Unassigned	Unassigned	218_0	Clustered	2	VC_218_0	2	0.1581	0.956133	0.1512	1	1	1	1
MGV-GENOME-0091054	Unassigned	Unassigned	Unassigned	830_0	Clustered	2	VC_830_0	2	1	1	1	1	1	1	1
MGV-GENOME-0092403	Unassigned	Unassigned	Unassigned	825_0	Clustered	8	VC_825_0	8	0.809	1	0.809	1	1	1	1
MGV-GENOME-0092797	Unassigned	Unassigned	Unassigned	66_0	Clustered	8	VC_66_0	8	0.372	1	0.372	1	1	1	1
MGV-GENOME-0094286	Unassigned	Unassigned	Unassigned	67_0	Clustered	10	VC_67_0	10	0.5931	1	0.5931	1	1	1	1
MGV-GENOME-0094416	Unassigned	Unassigned	Unassigned	831_0	Clustered	17	VC_831_0	17	1	1	1	1	1	1	1
MGV-GENOME-0094480	Unassigned	Unassigned	Unassigned	68_0	Clustered	7	VC_68_0	7	0.3589	1	0.3589	1	1	1	1
MGV-GENOME-0096407	Unassigned	Unassigned	Unassigned	830_0	Clustered	2	VC_830_0	2	1	1	1	1	1	1	1
MGV-GENOME-0097375	Unassigned	Unassigned	Unassigned	821_0	Clustered	2	VC_821_0	2	0.87	0.5	0.435	1	1	1	1
MGV-GENOME-0097682	Unassigned	Unassigned	Unassigned	453_0	Clustered	6	VC_453_0	6	0.404	1	0.404	1	2	2	1
MGV-GENOME-0097890	Unassigned	Unassigned	Unassigned	67_0	Clustered	10	VC_67_0	10	0.5931	1	0.5931	1	1	1	1
MGV-GENOME-0098342	Unassigned	Unassigned	Unassigned	67_0	Clustered	10	VC_67_0	10	0.5931	1	0.5931	1	1	1	1
MGV-GENOME-0098546	Unassigned	Unassigned	Unassigned	67_0	Clustered	10	VC_67_0	10	0.5931	1	0.5931	1	1	1	1
MGV-GENOME-0099750	Unassigned	Unassigned	Unassigned	68_0	Clustered	7	VC_68_0	7	0.3589	1	0.3589	1	1	1	1
MGV-GENOME-0099766	Unassigned	Unassigned	Unassigned	68_0	Clustered	7	VC_68_0	7	0.3589	1	0.3589	1	1	1	1
MGV-GENOME-0099982	Unassigned	Unassigned	Unassigned	833_0	Clustered	18	VC_833_0	18	0.8663	1	0.8663	1	1	1	1
MGV-GENOME-0100279	Unassigned	Unassigned	Unassigned	834_0	Clustered	2	VC_834_0	2	1	1	1	1	2	2	1
MGV-GENOME-0100283	Unassigned	Unassigned	Unassigned	67_0	Clustered	10	VC_67_0	10	0.5931	1	0.5931	1	1	1	1
MGV-GENOME-0101356	Unassigned	Unassigned	Unassigned	64_0	Clustered	5	VC_64_0	5	0.1954	1	0.1954	1	1	1	1
MGV-GENOME-0101397	Unassigned	Unassigned	Unassigned	68_0	Clustered	7	VC_68_0	7	0.3589	1	0.3589	1	1	1	1
MGV-GENOME-0101429	Unassigned	Unassigned	Unassigned	68_0	Clustered	7	VC_68_0	7	0.3589	1	0.3589	1	1	1	1
MGV-GENOME-0102487	Unassigned	Unassigned	Unassigned	64_0	Clustered	5	VC_64_0	5	0.1954	1	0.1954	1	1	1	1
MGV-GENOME-0102491	Unassigned	Unassigned	Unassigned	64_0	Clustered	5	VC_64_0	5	0.1954	1	0.1954	1	1	1	1
MGV-GENOME-0102770	Unassigned	Unassigned	Unassigned	299_0	Clustered	5	VC_299_0	5	0.4844	1	0.4844	1	1	1	1
MGV-GENOME-0103282	Unassigned	Unassigned	Unassigned	69_0	Clustered	2	VC_69_0	2	0.1203	0.955118	0.1149	1	1	1	1
MGV-GENOME-0103585	Unassigned	Unassigned	Unassigned	829_0	Clustered	9	VC_829_0	9	0.9711	1	0.9711	1	1	1	1
MGV-GENOME-0103994	Unassigned	Unassigned	Unassigned	65_0	Clustered	5	VC_65_0	5	0.0778	0.999999	0.0778	1	1	1	1
MGV-GENOME-0104133	Unassigned	Unassigned	Unassigned	299_0	Clustered	5	VC_299_0	5	0.4844	1	0.4844	1	1	1	1
MGV-GENOME-0104323	Unassigned	Unassigned	Unassigned	835_0	Clustered	4	VC_835_0	4	1	1	1	1	1	1	1
MGV-GENOME-0104363	Unassigned	Unassigned	Unassigned	67_0	Clustered	10	VC_67_0	10	0.5931	1	0.5931	1	1	1	1
MGV-GENOME-0104562	Unassigned	Unassigned	Unassigned	829_0	Clustered	9	VC_829_0	9	0.9711	1	0.9711	1	1	1	1
MGV-GENOME-0104563	Unassigned	Unassigned	Unassigned	67_0	Clustered	10	VC_67_0	10	0.5931	1	0.5931	1	1	1	1
MGV-GENOME-0104780	Unassigned	Unassigned	Unassigned	837_0	Clustered	6	VC_837_0	6	0.4395	1	0.4395	1	1	1	1
MGV-GENOME-0104996	Unassigned	Unassigned	Unassigned	836_0	Clustered	12	VC_836_0	12	0.7681	1	0.7681	1	1	1	1
MGV-GENOME-0105730	Unassigned	Unassigned	Unassigned	69_0	Clustered	2	VC_69_0	2	0.1203	0.955118	0.1149	1	1	1	1
MGV-GENOME-0106327	Unassigned	Unassigned	Unassigned	835_0	Clustered	4	VC_835_0	4	1	1	1	1	1	1	1
MGV-GENOME-0106389	Unassigned	Unassigned	Unassigned	832_0	Clustered	5	VC_832_0	5	0.3124	1	0.3124	1	1	1	1
MGV-GENOME-0106854	Unassigned	Unassigned	Unassigned	831_0	Clustered	17	VC_831_0	17	1	1	1	1	1	1	1
MGV-GENOME-0107386	Unassigned	Unassigned	Unassigned	68_0	Clustered	7	VC_68_0	7	0.3589	1	0.3589	1	1	1	1
MGV-GENOME-0107549	Unassigned	Unassigned	Unassigned	829_0	Clustered	9	VC_829_0	9	0.9711	1	0.9711	1	1	1	1
MGV-GENOME-0107782	Unassigned	Unassigned	Unassigned	65_0	Clustered	5	VC_65_0	5	0.0778	0.999999	0.0778	1	1	1	1
MGV-GENOME-0107927	Unassigned	Unassigned	Unassigned	218_0	Clustered	2	VC_218_0	2	0.1581	0.956133	0.1512	1	1	1	1
MGV-GENOME-0108345	Unassigned	Unassigned	Unassigned	831_0	Clustered	17	VC_831_0	17	1	1	1	1	1	1	1
MGV-GENOME-0108358	Unassigned	Unassigned	Unassigned	831_0	Clustered	17	VC_831_0	17	1	1	1	1	1	1	1
MGV-GENOME-0108416	Unassigned	Unassigned	Unassigned	837_0	Clustered	6	VC_837_0	6	0.4395	1	0.4395	1	1	1	1
MGV-GENOME-0108965	Unassigned	Unassigned	Unassigned	299_0	Clustered	5	VC_299_0	5	0.4844	1	0.4844	1	1	1	1
MGV-GENOME-0109098	Unassigned	Unassigned	Unassigned	831_0	Clustered	17	VC_831_0	17	1	1	1	1	1	1	1
MGV-GENOME-0109289	Unassigned	Unassigned	Unassigned	842_0	Clustered	2	VC_842_0	2	0.1505	0.945899	0.1424	1	1	1	1
MGV-GENOME-0110435	Unassigned	Unassigned	Unassigned	299_0	Clustered	5	VC_299_0	5	0.4844	1	0.4844	1	1	1	1
MGV-GENOME-0110481	Unassigned	Unassigned	Unassigned	831_0	Clustered	17	VC_831_0	17	1	1	1	1	1	1	1
MGV-GENOME-0110628	Unassigned	Unassigned	Unassigned	820_0	Clustered	3	VC_820_0	3	0.473	0.990241	0.4684	1	1	1	1
MGV-GENOME-0111881	Unassigned	Unassigned	Unassigned	67_0	Clustered	10	VC_67_0	10	0.5931	1	0.5931	1	1	1	1
MGV-GENOME-0111890	Unassigned	Unassigned	Unassigned	831_0	Clustered	17	VC_831_0	17	1	1	1	1	1	1	1
MGV-GENOME-0113048	Unassigned	Unassigned	Unassigned	831_0	Clustered	17	VC_831_0	17	1	1	1	1	1	1	1
MGV-GENOME-0113258	Unassigned	Unassigned	Unassigned	479_0	Clustered	3	VC_479_0	3	0.0884	0.99263	0.0878	1	1	1	1
MGV-GENOME-0113871	Unassigned	Unassigned	Unassigned	299_0	Clustered	5	VC_299_0	5	0.4844	1	0.4844	1	1	1	1
MGV-GENOME-0113939	Unassigned	Unassigned	Unassigned	846_0	Clustered	2	VC_846_0	2	0.2659	0.912378	0.2426	1	1	1	1
MGV-GENOME-0114240	Unassigned	Unassigned	Unassigned	829_0	Clustered	9	VC_829_0	9	0.9711	1	0.9711	1	1	1	1
MGV-GENOME-0114332	Unassigned	Unassigned	Unassigned	829_0	Clustered	9	VC_829_0	9	0.9711	1	0.9711	1	1	1	1
MGV-GENOME-0114827	Unassigned	Unassigned	Unassigned	831_0	Clustered	17	VC_831_0	17	1	1	1	1	1	1	1
MGV-GENOME-0115209	Unassigned	Unassigned	Unassigned	831_0	Clustered	17	VC_831_0	17	1	1	1	1	1	1	1
MGV-GENOME-0115672	Unassigned	Unassigned	Unassigned	837_0	Clustered	6	VC_837_0	6	0.4395	1	0.4395	1	1	1	1
MGV-GENOME-0115956	Unassigned	Unassigned	Unassigned	831_0	Clustered	17	VC_831_0	17	1	1	1	1	1	1	1
MGV-GENOME-0116414	Unassigned	Unassigned	Unassigned	193_0	Clustered	18	VC_193_0	18	0.9789	1	0.9789	1	1	1	1
MGV-GENOME-0116629	Unassigned	Unassigned	Unassigned	119_0	Clustered	58	VC_119_0	58	0.8362	1	0.8362	15	2	2	1
MGV-GENOME-0116685	Unassigned	Unassigned	Unassigned	831_0	Clustered	17	VC_831_0	17	1	1	1	1	1	1	1
MGV-GENOME-0117427	Unassigned	Unassigned	Unassigned	779_0	Clustered	26	VC_779_0	26	0.3016	1	0.3016	1	2	2	0.9569
MGV-GENOME-0117620	Unassigned	Unassigned	Unassigned	193_0	Clustered	18	VC_193_0	18	0.9789	1	0.9789	1	1	1	1
MGV-GENOME-0118517	Unassigned	Unassigned	Unassigned	835_0	Clustered	4	VC_835_0	4	1	1	1	1	1	1	1
MGV-GENOME-0118856	Unassigned	Unassigned	Unassigned	835_0	Clustered	4	VC_835_0	4	1	1	1	1	1	1	1
MGV-GENOME-0119126	Unassigned	Unassigned	Unassigned	394_0	Clustered	22	VC_394_0	22	0.704	1	0.704	1	1	1	0.9827
MGV-GENOME-0119400	Unassigned	Unassigned	Unassigned	858_0	Clustered	2	VC_858_0	2	1	1	1	1	1	1	1
MGV-GENOME-0119408	Unassigned	Unassigned	Unassigned	193_0	Clustered	18	VC_193_0	18	0.9789	1	0.9789	1	1	1	1
MGV-GENOME-0119515	Unassigned	Unassigned	Unassigned	648_0	Clustered	7	VC_648_0	7	0.4074	1	0.4074	1	1	1	1
MGV-GENOME-0119605	Unassigned	Unassigned	Unassigned	831_0	Clustered	17	VC_831_0	17	1	1	1	1	1	1	1
MGV-GENOME-0119891	Unassigned	Unassigned	Unassigned	193_0	Clustered	18	VC_193_0	18	0.9789	1	0.9789	1	1	1	1
MGV-GENOME-0120478	Unassigned	Unassigned	Unassigned	862_0	Clustered	7	VC_862_0	7	0.2163	1	0.2163	1	1	1	1
MGV-GENOME-0120623	Unassigned	Unassigned	Unassigned	867_0	Clustered	34	VC_867_0	34	0.8314	1	0.8314	1	1	1	1
MGV-GENOME-0121433	Unassigned	Unassigned	Unassigned	831_0	Clustered	17	VC_831_0	17	1	1	1	1	1	1	1
MGV-GENOME-0122056	Unassigned	Unassigned	Unassigned	790_0	Clustered	4	VC_790_0	4	0.5475	0.999981	0.5475	1	1	1	1
MGV-GENOME-0122838	Unassigned	Unassigned	Unassigned	833_0	Clustered	18	VC_833_0	18	0.8663	1	0.8663	1	1	1	1
MGV-GENOME-0122864	Unassigned	Unassigned	Unassigned	866_0	Clustered	4	VC_866_0	4	0.1057	0.999984	0.1057	1	1	1	1
MGV-GENOME-0122963	Unassigned	Unassigned	Unassigned	119_0	Clustered	58	VC_119_0	58	0.8362	1	0.8362	15	2	2	1
MGV-GENOME-0123294	Unassigned	Unassigned	Unassigned	867_0	Clustered	34	VC_867_0	34	0.8314	1	0.8314	1	1	1	1
MGV-GENOME-0123302	Unassigned	Unassigned	Unassigned	858_0	Clustered	2	VC_858_0	2	1	1	1	1	1	1	1
MGV-GENOME-0123373	Unassigned	Unassigned	Unassigned	193_0	Clustered	18	VC_193_0	18	0.9789	1	0.9789	1	1	1	1
MGV-GENOME-0123798	Unassigned	Unassigned	Unassigned	193_0	Clustered	18	VC_193_0	18	0.9789	1	0.9789	1	1	1	1
MGV-GENOME-0124501	Unassigned	Unassigned	Unassigned	833_0	Clustered	18	VC_833_0	18	0.8663	1	0.8663	1	1	1	1
MGV-GENOME-0124935	Unassigned	Unassigned	Unassigned	833_0	Clustered	18	VC_833_0	18	0.8663	1	0.8663	1	1	1	1
MGV-GENOME-0124939	Unassigned	Unassigned	Unassigned	831_0	Clustered	17	VC_831_0	17	1	1	1	1	1	1	1
MGV-GENOME-0125901	Unassigned	Unassigned	Unassigned	833_0	Clustered	18	VC_833_0	18	0.8663	1	0.8663	1	1	1	1
MGV-GENOME-0126261	Unassigned	Unassigned	Unassigned	831_0	Clustered	17	VC_831_0	17	1	1	1	1	1	1	1
MGV-GENOME-0126595	Unassigned	Unassigned	Unassigned	833_0	Clustered	18	VC_833_0	18	0.8663	1	0.8663	1	1	1	1
MGV-GENOME-0126621	Unassigned	Unassigned	Unassigned	832_0	Clustered	5	VC_832_0	5	0.3124	1	0.3124	1	1	1	1
MGV-GENOME-0126886	Unassigned	Unassigned	Unassigned	833_0	Clustered	18	VC_833_0	18	0.8663	1	0.8663	1	1	1	1
MGV-GENOME-0126942	Unassigned	Unassigned	Unassigned	833_0	Clustered	18	VC_833_0	18	0.8663	1	0.8663	1	1	1	1
MGV-GENOME-0127134	Unassigned	Unassigned	Unassigned	825_0	Clustered	8	VC_825_0	8	0.809	1	0.809	1	1	1	1
MGV-GENOME-0127136	Unassigned	Unassigned	Unassigned	833_0	Clustered	18	VC_833_0	18	0.8663	1	0.8663	1	1	1	1
MGV-GENOME-0127137	Unassigned	Unassigned	Unassigned	833_0	Clustered	18	VC_833_0	18	0.8663	1	0.8663	1	1	1	1
MGV-GENOME-0127386	Unassigned	Unassigned	Unassigned	833_0	Clustered	18	VC_833_0	18	0.8663	1	0.8663	1	1	1	1
MGV-GENOME-0127638	Unassigned	Unassigned	Unassigned	193_0	Clustered	18	VC_193_0	18	0.9789	1	0.9789	1	1	1	1
MGV-GENOME-0127684	Unassigned	Unassigned	Unassigned	779_0	Clustered	26	VC_779_0	26	0.3016	1	0.3016	1	2	2	0.9569
MGV-GENOME-0127847	Unassigned	Unassigned	Unassigned	876_0	Clustered	11	VC_876_0	11	0.5098	1	0.5098	1	1	1	0.9455
MGV-GENOME-0127853	Unassigned	Unassigned	Unassigned	833_0	Clustered	18	VC_833_0	18	0.8663	1	0.8663	1	1	1	1
MGV-GENOME-0128251	Unassigned	Unassigned	Unassigned	396_0	Clustered	4	VC_396_0	4	0.283	0.999984	0.283	1	1	1	1
MGV-GENOME-0128381	Unassigned	Unassigned	Unassigned	833_0	Clustered	18	VC_833_0	18	0.8663	1	0.8663	1	1	1	1
MGV-GENOME-0128479	Unassigned	Unassigned	Unassigned	454_0	Clustered	7	VC_454_0	7	0.6409	1	0.6409	1	2	2	1
MGV-GENOME-0128552	Unassigned	Unassigned	Unassigned	832_0	Clustered	5	VC_832_0	5	0.3124	1	0.3124	1	1	1	1
MGV-GENOME-0128654	Unassigned	Unassigned	Unassigned	832_0	Clustered	5	VC_832_0	5	0.3124	1	0.3124	1	1	1	1
MGV-GENOME-0128691	Unassigned	Unassigned	Unassigned	887_0	Clustered	4	VC_887_0	4	0.5734	0.999957	0.5734	1	1	1	1
MGV-GENOME-0128856	Unassigned	Unassigned	Unassigned	454_0	Clustered	7	VC_454_0	7	0.6409	1	0.6409	1	2	2	1
MGV-GENOME-0128895	Unassigned	Unassigned	Unassigned	193_0	Clustered	18	VC_193_0	18	0.9789	1	0.9789	1	1	1	1
MGV-GENOME-0129109	Unassigned	Unassigned	Unassigned	833_0	Clustered	18	VC_833_0	18	0.8663	1	0.8663	1	1	1	1
MGV-GENOME-0129178	Unassigned	Unassigned	Unassigned	159_0	Clustered	3	VC_159_0	3	0.2453	0.998367	0.2449	1	1	1	1
MGV-GENOME-0129223	Unassigned	Unassigned	Unassigned	832_0	Clustered	5	VC_832_0	5	0.3124	1	0.3124	1	1	1	1
MGV-GENOME-0129225	Unassigned	Unassigned	Unassigned	837_0	Clustered	6	VC_837_0	6	0.4395	1	0.4395	1	1	1	1
MGV-GENOME-0129394	Unassigned	Unassigned	Unassigned	866_0	Clustered	4	VC_866_0	4	0.1057	0.999984	0.1057	1	1	1	1
MGV-GENOME-0129477	Unassigned	Unassigned	Unassigned	833_0	Clustered	18	VC_833_0	18	0.8663	1	0.8663	1	1	1	1
MGV-GENOME-0130046	Unassigned	Unassigned	Unassigned	876_0	Clustered	11	VC_876_0	11	0.5098	1	0.5098	1	1	1	0.9455
MGV-GENOME-0130069	Unassigned	Unassigned	Unassigned	833_0	Clustered	18	VC_833_0	18	0.8663	1	0.8663	1	1	1	1
MGV-GENOME-0130518	Unassigned	Unassigned	Unassigned	193_0	Clustered	18	VC_193_0	18	0.9789	1	0.9789	1	1	1	1
MGV-GENOME-0130717	Unassigned	Unassigned	Unassigned	454_0	Clustered	7	VC_454_0	7	0.6409	1	0.6409	1	2	2	1
MGV-GENOME-0131121	Unassigned	Unassigned	Unassigned	315_0	Clustered	11	VC_315_0	11	0.4372	1	0.4372	1	2	2	1
MGV-GENOME-0131209	Unassigned	Unassigned	Unassigned	254_0	Clustered	43	VC_254_0	43	0.8474	1	0.8474	2	2	2	1
MGV-GENOME-0132091	Unassigned	Unassigned	Unassigned	241_0	Clustered	12	VC_241_0	12	0.7494	1	0.7494	1	1	1	1
MGV-GENOME-0132460	Unassigned	Unassigned	Unassigned	491_0	Clustered	5	VC_491_0	5	0.7181	0.999987	0.7181	1	1	1	1
MGV-GENOME-0132948	Unassigned	Unassigned	Unassigned	893_0	Clustered	4	VC_893_0	4	0.118	0.996268	0.1175	1	1	1	0.8333
MGV-GENOME-0133552	Unassigned	Unassigned	Unassigned	455_0	Clustered	8	VC_455_0	8	0.7988	1	0.7988	1	1	1	1
MGV-GENOME-0133554	Unassigned	Unassigned	Unassigned	455_0	Clustered	8	VC_455_0	8	0.7988	1	0.7988	1	1	1	1
MGV-GENOME-0133664	Unassigned	Unassigned	Unassigned	119_0	Clustered	58	VC_119_0	58	0.8362	1	0.8362	15	2	2	1
MGV-GENOME-0134236	Unassigned	Unassigned	Unassigned	826_0	Clustered	2	VC_826_0	2	0.1586	0.939818	0.1491	1	1	1	1
MGV-GENOME-0134494	Unassigned	Unassigned	Unassigned	823_0	Clustered	9	VC_823_0	9	0.9202	1	0.9202	1	1	1	1
MGV-GENOME-0134604	Unassigned	Unassigned	Unassigned	895_0	Clustered	6	VC_895_0	6	0.4522	1	0.4522	1	1	1	1
MGV-GENOME-0135072	Unassigned	Unassigned	Unassigned	193_0	Clustered	18	VC_193_0	18	0.9789	1	0.9789	1	1	1	1
MGV-GENOME-0135126	Unassigned	Unassigned	Unassigned	902_0	Clustered	2	VC_902_0	2	0.8614	0.729854	0.6287	1	1	1	1
MGV-GENOME-0135409	Unassigned	Unassigned	Unassigned	159_0	Clustered	3	VC_159_0	3	0.2453	0.998367	0.2449	1	1	1	1
MGV-GENOME-0135693	Unassigned	Unassigned	Unassigned	491_0	Clustered	5	VC_491_0	5	0.7181	0.999987	0.7181	1	1	1	1
MGV-GENOME-0135837	Unassigned	Unassigned	Unassigned	599_0	Clustered	20	VC_599_0	20	0.7515	1	0.7515	1	1	1	1
MGV-GENOME-0136013	Unassigned	Unassigned	Unassigned	613_0	Clustered	8	VC_613_0	8	0.4703	1	0.4703	1	1	1	1
MGV-GENOME-0136049	Unassigned	Unassigned	Unassigned	793_0	Clustered	5	VC_793_0	5	0.4961	1	0.4961	1	1	1	1
MGV-GENOME-0136103	Unassigned	Unassigned	Unassigned	159_0	Clustered	3	VC_159_0	3	0.2453	0.998367	0.2449	1	1	1	1
MGV-GENOME-0136511	Unassigned	Unassigned	Unassigned	895_0	Clustered	6	VC_895_0	6	0.4522	1	0.4522	1	1	1	1
MGV-GENOME-0137166	Unassigned	Unassigned	Unassigned	876_0	Clustered	11	VC_876_0	11	0.5098	1	0.5098	1	1	1	0.9455
MGV-GENOME-0137184	Unassigned	Unassigned	Unassigned	859_0	Clustered	4	VC_859_0	4	0.5093	0.998538	0.5085	1	1	1	1
MGV-GENOME-0138109	Unassigned	Unassigned	Unassigned	367_0	Clustered	15	VC_367_0	15	0.3034	1	0.3034	1	2	2	1
MGV-GENOME-0138427	Unassigned	Unassigned	Unassigned	790_0	Clustered	4	VC_790_0	4	0.5475	0.999981	0.5475	1	1	1	1
MGV-GENOME-0138669	Unassigned	Unassigned	Unassigned	455_0	Clustered	8	VC_455_0	8	0.7988	1	0.7988	1	1	1	1
MGV-GENOME-0138672	Unassigned	Unassigned	Unassigned	455_0	Clustered	8	VC_455_0	8	0.7988	1	0.7988	1	1	1	1
MGV-GENOME-0139300	Unassigned	Unassigned	Unassigned	928_0	Clustered	5	VC_928_0	5	0.7163	0.999999	0.7163	1	1	1	1
MGV-GENOME-0139305	Unassigned	Unassigned	Unassigned	929_0	Clustered	5	VC_929_0	5	0.6049	1	0.6049	1	1	1	1
MGV-GENOME-0139537	Unassigned	Unassigned	Unassigned	193_0	Clustered	18	VC_193_0	18	0.9789	1	0.9789	1	1	1	1
MGV-GENOME-0139566	Unassigned	Unassigned	Unassigned	837_0	Clustered	6	VC_837_0	6	0.4395	1	0.4395	1	1	1	1
MGV-GENOME-0139787	Unassigned	Unassigned	Unassigned	935_0	Clustered	5	VC_935_0	5	0.7735	0.999997	0.7735	1	1	1	1
MGV-GENOME-0140023	Unassigned	Unassigned	Unassigned	718_0	Clustered	11	VC_718_0	11	0.8461	1	0.8461	1	1	1	1
MGV-GENOME-0140072	Unassigned	Unassigned	Unassigned	935_0	Clustered	5	VC_935_0	5	0.7735	0.999997	0.7735	1	1	1	1
MGV-GENOME-0140191	Unassigned	Unassigned	Unassigned	611_0	Clustered	19	VC_611_0	19	0.7156	1	0.7156	1	1	1	1
MGV-GENOME-0140562	Unassigned	Unassigned	Unassigned	938_0	Clustered	2	VC_938_0	2	1	1	1	1	1	1	1
MGV-GENOME-0140938	Unassigned	Unassigned	Unassigned	842_0	Clustered	2	VC_842_0	2	0.1505	0.945899	0.1424	1	1	1	1
MGV-GENOME-0141338	Unassigned	Unassigned	Unassigned	935_0	Clustered	5	VC_935_0	5	0.7735	0.999997	0.7735	1	1	1	1
MGV-GENOME-0141407	Unassigned	Unassigned	Unassigned	397_0	Clustered	2	VC_397_0	2	0.1581	0.954409	0.1509	1	1	1	1
MGV-GENOME-0141490	Unassigned	Unassigned	Unassigned	779_0	Clustered	26	VC_779_0	26	0.3016	1	0.3016	1	2	2	0.9569
MGV-GENOME-0142180	Unassigned	Unassigned	Unassigned	941_0	Clustered	16	VC_941_0	16	0.8535	1	0.8535	1	1	1	1
MGV-GENOME-0142829	Unassigned	Unassigned	Unassigned	119_0	Clustered	58	VC_119_0	58	0.8362	1	0.8362	15	2	2	1
MGV-GENOME-0142845	Unassigned	Unassigned	Unassigned	941_0	Clustered	16	VC_941_0	16	0.8535	1	0.8535	1	1	1	1
MGV-GENOME-0142911	Unassigned	Unassigned	Unassigned	825_0	Clustered	8	VC_825_0	8	0.809	1	0.809	1	1	1	1
MGV-GENOME-0143028	Unassigned	Unassigned	Unassigned	876_0	Clustered	11	VC_876_0	11	0.5098	1	0.5098	1	1	1	0.9455
MGV-GENOME-0143342	Unassigned	Unassigned	Unassigned	455_0	Clustered	8	VC_455_0	8	0.7988	1	0.7988	1	1	1	1
MGV-GENOME-0143905	Unassigned	Unassigned	Unassigned	455_0	Clustered	8	VC_455_0	8	0.7988	1	0.7988	1	1	1	1
MGV-GENOME-0144303	Unassigned	Unassigned	Unassigned	455_0	Clustered	8	VC_455_0	8	0.7988	1	0.7988	1	1	1	1
MGV-GENOME-0144376	Unassigned	Unassigned	Unassigned	602_0	Clustered	2	VC_602_0	2	0.2557	0.94756	0.2423	1	1	1	1
MGV-GENOME-0144504	Unassigned	Unassigned	Unassigned	616_1	Clustered	14	VC_616_1	14	0.3939	1	0.3939	1	1	1	0.7143
MGV-GENOME-0144645	Unassigned	Unassigned	Unassigned	397_0	Clustered	2	VC_397_0	2	0.1581	0.954409	0.1509	1	1	1	1
MGV-GENOME-0144886	Unassigned	Unassigned	Unassigned	935_0	Clustered	5	VC_935_0	5	0.7735	0.999997	0.7735	1	1	1	1
MGV-GENOME-0144897	Unassigned	Unassigned	Unassigned	193_0	Clustered	18	VC_193_0	18	0.9789	1	0.9789	1	1	1	1
MGV-GENOME-0145194	Unassigned	Unassigned	Unassigned	912_0	Clustered/Singleton	1	VC_912_0	1	0	1	0	1	1	1	1
MGV-GENOME-0145359	Unassigned	Unassigned	Unassigned	956_0	Clustered	15	VC_956_0	15	0.5616	1	0.5616	1	1	1	0.981
MGV-GENOME-0145618	Unassigned	Unassigned	Unassigned	310_0	Clustered	3	VC_310_0	3	0.1492	0.981243	0.1464	1	1	1	1
MGV-GENOME-0145778	Unassigned	Unassigned	Unassigned	956_0	Clustered	15	VC_956_0	15	0.5616	1	0.5616	1	1	1	0.981
MGV-GENOME-0145846	Unassigned	Unassigned	Unassigned	571_0	Clustered	104	VC_571_0	104	0.7505	1	0.7505	1	1	1	0.9994
MGV-GENOME-0145997	Unassigned	Unassigned	Unassigned	455_0	Clustered	8	VC_455_0	8	0.7988	1	0.7988	1	1	1	1
MGV-GENOME-0146173	Unassigned	Unassigned	Unassigned	823_0	Clustered	9	VC_823_0	9	0.9202	1	0.9202	1	1	1	1
MGV-GENOME-0146175	Unassigned	Unassigned	Unassigned	823_0	Clustered	9	VC_823_0	9	0.9202	1	0.9202	1	1	1	1
MGV-GENOME-0146472	Unassigned	Unassigned	Unassigned	234_0	Clustered	31	VC_234_0	31	0.7417	1	0.7417	2	2	2	0.972
MGV-GENOME-0146485	Unassigned	Unassigned	Unassigned	652_0	Clustered	17	VC_652_0	17	0.5818	1	0.5818	1	1	1	1
MGV-GENOME-0146922	Unassigned	Unassigned	Unassigned	867_0	Clustered	34	VC_867_0	34	0.8314	1	0.8314	1	1	1	1
MGV-GENOME-0146924	Unassigned	Unassigned	Unassigned	823_0	Clustered	9	VC_823_0	9	0.9202	1	0.9202	1	1	1	1
MGV-GENOME-0146993	Unassigned	Unassigned	Unassigned	234_0	Clustered	31	VC_234_0	31	0.7417	1	0.7417	2	2	2	0.972
MGV-GENOME-0147297	Unassigned	Unassigned	Unassigned	823_0	Clustered	9	VC_823_0	9	0.9202	1	0.9202	1	1	1	1
MGV-GENOME-0148015	Unassigned	Unassigned	Unassigned	965_0	Clustered	14	VC_965_0	14	0.8601	1	0.8601	1	1	1	1
MGV-GENOME-0148051	Unassigned	Unassigned	Unassigned	599_0	Clustered	20	VC_599_0	20	0.7515	1	0.7515	1	1	1	1
MGV-GENOME-0148676	Unassigned	Unassigned	Unassigned	874_0	Clustered	6	VC_874_0	6	0.6835	1	0.6835	1	1	1	1
MGV-GENOME-0148770	Unassigned	Unassigned	Unassigned	278_0	Clustered	29	VC_278_0	29	0.7459	1	0.7459	1	1	1	0.9828
MGV-GENOME-0148774	Unassigned	Unassigned	Unassigned	823_0	Clustered	9	VC_823_0	9	0.9202	1	0.9202	1	1	1	1
MGV-GENOME-0148899	Unassigned	Unassigned	Unassigned	976_0	Clustered	6	VC_976_0	6	0.9943	0.995424	0.9898	1	1	1	1
MGV-GENOME-0149156	Unassigned	Unassigned	Unassigned	461_0	Clustered	4	VC_461_0	4	0.3218	0.999925	0.3218	1	1	1	1
MGV-GENOME-0149313	Unassigned	Unassigned	Unassigned	867_0	Clustered	34	VC_867_0	34	0.8314	1	0.8314	1	1	1	1
MGV-GENOME-0149332	Unassigned	Unassigned	Unassigned	616_1	Clustered	14	VC_616_1	14	0.3939	1	0.3939	1	1	1	0.7143
MGV-GENOME-0149360	Unassigned	Unassigned	Unassigned	461_0	Clustered	4	VC_461_0	4	0.3218	0.999925	0.3218	1	1	1	1
MGV-GENOME-0149451	Unassigned	Unassigned	Unassigned	471_0	Clustered	3	VC_471_0	3	0.2804	0.998324	0.28	1	1	1	1
MGV-GENOME-0149455	Unassigned	Unassigned	Unassigned	867_0	Clustered	34	VC_867_0	34	0.8314	1	0.8314	1	1	1	1
MGV-GENOME-0149539	Unassigned	Unassigned	Unassigned	272_0	Clustered	3	VC_272_0	3	0.3758	0.998066	0.3751	1	1	1	1
MGV-GENOME-0149599	Unassigned	Unassigned	Unassigned	317_0	Clustered	6	VC_317_0	6	0.1208	0.999999	0.1208	1	1	1	0.8667
MGV-GENOME-0149945	Unassigned	Unassigned	Unassigned	980_0	Clustered	2	VC_980_0	2	0.1272	0.954205	0.1214	1	1	1	1
MGV-GENOME-0150041	Unassigned	Unassigned	Unassigned	895_0	Clustered	6	VC_895_0	6	0.4522	1	0.4522	1	1	1	1
MGV-GENOME-0150327	Unassigned	Unassigned	Unassigned	984_0	Clustered	3	VC_984_0	3	0.2694	0.997861	0.2688	1	1	1	1
MGV-GENOME-0150847	Unassigned	Unassigned	Unassigned	511_0	Clustered	27	VC_511_0	27	0.7433	1	0.7433	1	1	1	0.9943
MGV-GENOME-0150861	Unassigned	Unassigned	Unassigned	807_0	Clustered	3	VC_807_0	3	0.2302	0.997857	0.2297	1	1	1	1
MGV-GENOME-0151139	Unassigned	Unassigned	Unassigned	274_1	Clustered	17	VC_274_1	17	0.4262	1	0.4262	1	1	1	0.9706
MGV-GENOME-0151228	Unassigned	Unassigned	Unassigned	929_0	Clustered	5	VC_929_0	5	0.6049	1	0.6049	1	1	1	1
MGV-GENOME-0151242	Unassigned	Unassigned	Unassigned	984_0	Clustered	3	VC_984_0	3	0.2694	0.997861	0.2688	1	1	1	1
MGV-GENOME-0151719	Unassigned	Unassigned	Unassigned	994_0	Clustered	2	VC_994_0	2	0.7	0.89435	0.626	1	1	1	1
MGV-GENOME-0151821	Unassigned	Unassigned	Unassigned	976_0	Clustered	6	VC_976_0	6	0.9943	0.995424	0.9898	1	1	1	1
MGV-GENOME-0151881	Unassigned	Unassigned	Unassigned	949_0	Clustered	5	VC_949_0	5	0.387	1	0.387	1	1	1	1
MGV-GENOME-0151914	Unassigned	Unassigned	Unassigned	928_0	Clustered	5	VC_928_0	5	0.7163	0.999999	0.7163	1	1	1	1
MGV-GENOME-0151930	Unassigned	Unassigned	Unassigned	874_0	Clustered	6	VC_874_0	6	0.6835	1	0.6835	1	1	1	1
MGV-GENOME-0152089	Unassigned	Unassigned	Unassigned	315_0	Clustered	11	VC_315_0	11	0.4372	1	0.4372	1	2	2	1
MGV-GENOME-0152230	Unassigned	Unassigned	Unassigned	887_0	Clustered	4	VC_887_0	4	0.5734	0.999957	0.5734	1	1	1	1
MGV-GENOME-0152373	Unassigned	Unassigned	Unassigned	193_0	Clustered	18	VC_193_0	18	0.9789	1	0.9789	1	1	1	1
MGV-GENOME-0152447	Unassigned	Unassigned	Unassigned	1002_0	Clustered	4	VC_1002_0	4	0.7696	0.999965	0.7696	1	1	1	1
MGV-GENOME-0152503	Unassigned	Unassigned	Unassigned	399_0	Clustered	35	VC_399_0	35	0.8697	1	0.8697	1	1	1	0.9782
MGV-GENOME-0152561	Unassigned	Unassigned	Unassigned	651_0	Clustered/Singleton	1	VC_651_0	1	0	1	0	1	1	1	1
MGV-GENOME-0153179	Unassigned	Unassigned	Unassigned	859_0	Clustered	4	VC_859_0	4	0.5093	0.998538	0.5085	1	1	1	1
MGV-GENOME-0153294	Unassigned	Unassigned	Unassigned	396_0	Clustered	4	VC_396_0	4	0.283	0.999984	0.283	1	1	1	1
MGV-GENOME-0153426	Unassigned	Unassigned	Unassigned	1009_0	Clustered	8	VC_1009_0	8	0.1214	1	0.1214	1	1	1	0.8929
MGV-GENOME-0153483	Unassigned	Unassigned	Unassigned	1013_0	Clustered	2	VC_1013_0	2	0.831	0.814453	0.6768	1	1	1	1
MGV-GENOME-0153510	Unassigned	Unassigned	Unassigned	475_0	Clustered	11	VC_475_0	11	0.2815	1	0.2815	1	1	1	1
MGV-GENOME-0153669	Unassigned	Unassigned	Unassigned	1019_0	Clustered	5	VC_1019_0	5	0.4017	1	0.4017	1	1	1	1
MGV-GENOME-0153695	Unassigned	Unassigned	Unassigned	545_0	Clustered	10	VC_545_0	10	0.5907	1	0.5907	1	1	1	1
MGV-GENOME-0153994	Unassigned	Unassigned	Unassigned	367_0	Clustered	15	VC_367_0	15	0.3034	1	0.3034	1	2	2	1
MGV-GENOME-0153995	Unassigned	Unassigned	Unassigned	1008_0	Clustered	33	VC_1008_0	33	0.7947	1	0.7947	1	1	1	1
MGV-GENOME-0154070	Unassigned	Unassigned	Unassigned	1025_0	Clustered	4	VC_1025_0	4	0.2689	0.999947	0.2688	1	1	1	1
MGV-GENOME-0154102	Unassigned	Unassigned	Unassigned	278_0	Clustered	29	VC_278_0	29	0.7459	1	0.7459	1	1	1	0.9828
MGV-GENOME-0154443	Unassigned	Unassigned	Unassigned	650_0	Clustered	26	VC_650_0	26	0.5261	1	0.5261	1	1	1	0.92
MGV-GENOME-0154455	Unassigned	Unassigned	Unassigned	327_0	Clustered	2	VC_327_0	2	0.271	0.931679	0.2525	1	1	1	1
MGV-GENOME-0154721	Unassigned	Unassigned	Unassigned	234_0	Clustered	31	VC_234_0	31	0.7417	1	0.7417	2	2	2	0.972
MGV-GENOME-0154864	Unassigned	Unassigned	Unassigned	1013_0	Clustered	2	VC_1013_0	2	0.831	0.814453	0.6768	1	1	1	1
MGV-GENOME-0155045	Unassigned	Unassigned	Unassigned	643_0	Clustered	15	VC_643_0	15	0.5495	1	0.5495	1	1	1	1
MGV-GENOME-0155253	Unassigned	Unassigned	Unassigned	1030_0	Clustered	11	VC_1030_0	11	0.9679	1	0.9679	1	1	1	1
MGV-GENOME-0155338	Unassigned	Unassigned	Unassigned	278_0	Clustered	29	VC_278_0	29	0.7459	1	0.7459	1	1	1	0.9828
MGV-GENOME-0155347	Unassigned	Unassigned	Unassigned	1031_0	Clustered	17	VC_1031_0	17	1	1	1	1	1	1	1
MGV-GENOME-0155360	Unassigned	Unassigned	Unassigned	1032_0	Clustered	34	VC_1032_0	34	0.9651	1	0.9651	1	1	1	1
MGV-GENOME-0155792	Unassigned	Unassigned	Unassigned	277_0	Clustered	21	VC_277_0	21	0.7406	1	0.7406	1	1	1	1
MGV-GENOME-0155967	Unassigned	Unassigned	Unassigned	545_0	Clustered	10	VC_545_0	10	0.5907	1	0.5907	1	1	1	1
MGV-GENOME-0156126	Unassigned	Unassigned	Unassigned	917_0	Clustered	23	VC_917_0	23	0.7887	1	0.7887	1	1	1	0.996
MGV-GENOME-0156205	Unassigned	Unassigned	Unassigned	823_0	Clustered	9	VC_823_0	9	0.9202	1	0.9202	1	1	1	1
MGV-GENOME-0156217	Unassigned	Unassigned	Unassigned	875_0	Clustered	22	VC_875_0	22	0.7922	1	0.7922	1	1	1	1
MGV-GENOME-0156279	Unassigned	Unassigned	Unassigned	193_0	Clustered	18	VC_193_0	18	0.9789	1	0.9789	1	1	1	1
MGV-GENOME-0156508	Unassigned	Unassigned	Unassigned	498_0	Clustered	3	VC_498_0	3	0.2002	0.998497	0.1999	1	1	1	1
MGV-GENOME-0156509	Unassigned	Unassigned	Unassigned	254_0	Clustered	43	VC_254_0	43	0.8474	1	0.8474	2	2	2	1
MGV-GENOME-0156731	Unassigned	Unassigned	Unassigned	656_0	Clustered	15	VC_656_0	15	0.1884	1	0.1884	1	1	1	0.8857
MGV-GENOME-0157019	Unassigned	Unassigned	Unassigned	546_0	Clustered	3	VC_546_0	3	0.1698	0.998115	0.1695	1	1	1	1
MGV-GENOME-0157033	Unassigned	Unassigned	Unassigned	367_0	Clustered	15	VC_367_0	15	0.3034	1	0.3034	1	2	2	1
MGV-GENOME-0157061	Unassigned	Unassigned	Unassigned	917_0	Clustered	23	VC_917_0	23	0.7887	1	0.7887	1	1	1	0.996
MGV-GENOME-0157086	Unassigned	Unassigned	Unassigned	546_0	Clustered	3	VC_546_0	3	0.1698	0.998115	0.1695	1	1	1	1
MGV-GENOME-0157122	Unassigned	Unassigned	Unassigned	316_2	Clustered	7	VC_316_2	7	0.1554	1	0.1554	1	1	1	1
MGV-GENOME-0157255	Unassigned	Unassigned	Unassigned	315_0	Clustered	11	VC_315_0	11	0.4372	1	0.4372	1	2	2	1
MGV-GENOME-0157423	Unassigned	Unassigned	Unassigned	600_0	Clustered	5	VC_600_0	5	0.3791	1	0.3791	1	1	1	1
MGV-GENOME-0157477	Unassigned	Unassigned	Unassigned	1035_0	Clustered	2	VC_1035_0	2	0.1585	0.951103	0.1508	1	1	1	1
MGV-GENOME-0157490	Unassigned	Unassigned	Unassigned	892_0	Clustered	14	VC_892_0	14	0.5618	1	0.5618	1	1	1	0.9231
MGV-GENOME-0157582	Unassigned	Unassigned	Unassigned	862_0	Clustered	7	VC_862_0	7	0.2163	1	0.2163	1	1	1	1
MGV-GENOME-0157612	Unassigned	Unassigned	Unassigned	876_0	Clustered	11	VC_876_0	11	0.5098	1	0.5098	1	1	1	0.9455
MGV-GENOME-0157671	Unassigned	Unassigned	Unassigned	486_0	Clustered	3	VC_486_0	3	0.5354	0.99767	0.5342	1	1	1	1
MGV-GENOME-0157749	Unassigned	Unassigned	Unassigned	965_0	Clustered	14	VC_965_0	14	0.8601	1	0.8601	1	1	1	1
MGV-GENOME-0157976	Unassigned	Unassigned	Unassigned	278_0	Clustered	29	VC_278_0	29	0.7459	1	0.7459	1	1	1	0.9828
MGV-GENOME-0158059	Unassigned	Unassigned	Unassigned	917_0	Clustered	23	VC_917_0	23	0.7887	1	0.7887	1	1	1	0.996
MGV-GENOME-0158433	Unassigned	Unassigned	Unassigned	1029_0	Clustered	2	VC_1029_0	2	0.0694	0.955489	0.0663	1	1	1	1
MGV-GENOME-0158444	Unassigned	Unassigned	Unassigned	1032_0	Clustered	34	VC_1032_0	34	0.9651	1	0.9651	1	1	1	1
MGV-GENOME-0158686	Unassigned	Unassigned	Unassigned	662_0	Clustered	2	VC_662_0	2	0.0404	0.954025	0.0385	1	1	1	1
MGV-GENOME-0158767	Unassigned	Unassigned	Unassigned	1032_0	Clustered	34	VC_1032_0	34	0.9651	1	0.9651	1	1	1	1
MGV-GENOME-0158886	Unassigned	Unassigned	Unassigned	545_0	Clustered	10	VC_545_0	10	0.5907	1	0.5907	1	1	1	1
MGV-GENOME-0158912	Unassigned	Unassigned	Unassigned	869_0	Clustered	2	VC_869_0	2	0.1507	0.942513	0.142	1	1	1	1
MGV-GENOME-0158994	Unassigned	Unassigned	Unassigned	254_0	Clustered	43	VC_254_0	43	0.8474	1	0.8474	2	2	2	1
MGV-GENOME-0158995	Unassigned	Unassigned	Unassigned	522_0	Clustered	23	VC_522_0	23	0.3968	1	0.3968	1	1	1	0.8379
MGV-GENOME-0159003	Unassigned	Unassigned	Unassigned	867_0	Clustered	34	VC_867_0	34	0.8314	1	0.8314	1	1	1	1
MGV-GENOME-0159014	Unassigned	Unassigned	Unassigned	976_0	Clustered	6	VC_976_0	6	0.9943	0.995424	0.9898	1	1	1	1
MGV-GENOME-0159096	Unassigned	Unassigned	Unassigned	650_0	Clustered	26	VC_650_0	26	0.5261	1	0.5261	1	1	1	0.92
MGV-GENOME-0159446	Unassigned	Unassigned	Unassigned	1024_0	Clustered	9	VC_1024_0	9	0.7729	1	0.7729	1	1	1	1
MGV-GENOME-0159548	Unassigned	Unassigned	Unassigned	872_0	Clustered	2	VC_872_0	2	0.3007	0.948554	0.2852	1	1	1	1
MGV-GENOME-0159571	Unassigned	Unassigned	Unassigned	643_0	Clustered	15	VC_643_0	15	0.5495	1	0.5495	1	1	1	1
MGV-GENOME-0159639	Unassigned	Unassigned	Unassigned	193_0	Clustered	18	VC_193_0	18	0.9789	1	0.9789	1	1	1	1
MGV-GENOME-0159723	Unassigned	Unassigned	Unassigned	119_0	Clustered	58	VC_119_0	58	0.8362	1	0.8362	15	2	2	1
MGV-GENOME-0159801	Unassigned	Unassigned	Unassigned	908_0	Clustered/Singleton	1	VC_908_0	1	0	1	0	1	1	1	1
MGV-GENOME-0159939	Unassigned	Unassigned	Unassigned	521_0	Clustered	28	VC_521_0	28	0.8264	1	0.8264	1	1	1	1
MGV-GENOME-0159940	Unassigned	Unassigned	Unassigned	521_0	Clustered	28	VC_521_0	28	0.8264	1	0.8264	1	1	1	1
MGV-GENOME-0160247	Unassigned	Unassigned	Unassigned	917_0	Clustered	23	VC_917_0	23	0.7887	1	0.7887	1	1	1	0.996
MGV-GENOME-0160316	Unassigned	Unassigned	Unassigned	808_0	Clustered	2	VC_808_0	2	0.0709	0.954179	0.0677	1	1	1	1
MGV-GENOME-0160523	Unassigned	Unassigned	Unassigned	270_0	Clustered	8	VC_270_0	8	0.4243	1	0.4243	1	1	1	0.8214
MGV-GENOME-0160636	Unassigned	Unassigned	Unassigned	902_0	Clustered	2	VC_902_0	2	0.8614	0.729854	0.6287	1	1	1	1
MGV-GENOME-0161054	Unassigned	Unassigned	Unassigned	895_0	Clustered	6	VC_895_0	6	0.4522	1	0.4522	1	1	1	1
MGV-GENOME-0161110	Unassigned	Unassigned	Unassigned	880_1	Clustered	15	VC_880_1	15	0.5141	1	0.5141	1	1	1	1
MGV-GENOME-0161242	Unassigned	Unassigned	Unassigned	650_0	Clustered	26	VC_650_0	26	0.5261	1	0.5261	1	1	1	0.92
MGV-GENOME-0161256	Unassigned	Unassigned	Unassigned	932_0	Clustered	3	VC_932_0	3	0.5413	0.996853	0.5396	1	1	1	1
MGV-GENOME-0161265	Unassigned	Unassigned	Unassigned	1072_0	Clustered	4	VC_1072_0	4	0.7757	0.999633	0.7754	1	1	1	1
MGV-GENOME-0161292	Unassigned	Unassigned	Unassigned	779_0	Clustered	26	VC_779_0	26	0.3016	1	0.3016	1	2	2	0.9569
MGV-GENOME-0161346	Unassigned	Unassigned	Unassigned	656_0	Clustered	15	VC_656_0	15	0.1884	1	0.1884	1	1	1	0.8857
MGV-GENOME-0161354	Unassigned	Unassigned	Unassigned	901_0	Clustered	8	VC_901_0	8	0.8584	1	0.8584	1	1	1	1
MGV-GENOME-0161392	Unassigned	Unassigned	Unassigned	1073_0	Clustered	6	VC_1073_0	6	0.4616	1	0.4616	1	1	1	1
MGV-GENOME-0161523	Unassigned	Unassigned	Unassigned	1080_0	Clustered	2	VC_1080_0	2	1	1	1	1	1	1	1
MGV-GENOME-0161603	Unassigned	Unassigned	Unassigned	475_0	Clustered	11	VC_475_0	11	0.2815	1	0.2815	1	1	1	1
MGV-GENOME-0161757	Unassigned	Unassigned	Unassigned	474_0	Clustered	2	VC_474_0	2	0.2512	0.939655	0.236	1	1	1	1
MGV-GENOME-0161805	Unassigned	Unassigned	Unassigned	245_0	Clustered	3	VC_245_0	3	0.1525	0.996866	0.1521	1	2	2	1
MGV-GENOME-0162189	Unassigned	Unassigned	Unassigned	522_0	Clustered	23	VC_522_0	23	0.3968	1	0.3968	1	1	1	0.8379
MGV-GENOME-0162213	Unassigned	Unassigned	Unassigned	1051_0	Clustered	4	VC_1051_0	4	0.4904	0.999976	0.4904	1	1	1	1
MGV-GENOME-0162285	Unassigned	Unassigned	Unassigned	506_0	Clustered	15	VC_506_0	15	0.7656	1	0.7656	1	1	1	1
MGV-GENOME-0162286	Unassigned	Unassigned	Unassigned	442_0	Clustered	6	VC_442_0	6	0.2425	1	0.2425	1	1	1	1
MGV-GENOME-0162500	Unassigned	Unassigned	Unassigned	999_0	Clustered	4	VC_999_0	4	0.5068	0.999958	0.5068	1	1	1	1
MGV-GENOME-0162699	Unassigned	Unassigned	Unassigned	1093_0	Clustered	31	VC_1093_0	31	0.913	1	0.913	1	1	1	1
MGV-GENOME-0162728	Unassigned	Unassigned	Unassigned	193_0	Clustered	18	VC_193_0	18	0.9789	1	0.9789	1	1	1	1
MGV-GENOME-0162903	Unassigned	Unassigned	Unassigned	844_0	Clustered	8	VC_844_0	8	0.6353	1	0.6353	1	1	1	1
MGV-GENOME-0162909	Unassigned	Unassigned	Unassigned	867_0	Clustered	34	VC_867_0	34	0.8314	1	0.8314	1	1	1	1
MGV-GENOME-0162953	Unassigned	Unassigned	Unassigned	522_0	Clustered	23	VC_522_0	23	0.3968	1	0.3968	1	1	1	0.8379
MGV-GENOME-0163420	Unassigned	Unassigned	Unassigned	599_0	Clustered	20	VC_599_0	20	0.7515	1	0.7515	1	1	1	1
MGV-GENOME-0163457	Unassigned	Unassigned	Unassigned	650_0	Clustered	26	VC_650_0	26	0.5261	1	0.5261	1	1	1	0.92
MGV-GENOME-0163466	Unassigned	Unassigned	Unassigned	506_0	Clustered	15	VC_506_0	15	0.7656	1	0.7656	1	1	1	1
MGV-GENOME-0163475	Unassigned	Unassigned	Unassigned	365_0	Clustered	5	VC_365_0	5	0.3248	1	0.3248	1	1	1	1
MGV-GENOME-0163769	Unassigned	Unassigned	Unassigned	484_0	Clustered	5	VC_484_0	5	0.4523	1	0.4523	1	1	1	1
MGV-GENOME-0163928	Unassigned	Unassigned	Unassigned	994_0	Clustered	2	VC_994_0	2	0.7	0.89435	0.626	1	1	1	1
MGV-GENOME-0164150	Unassigned	Unassigned	Unassigned	507_0	Clustered	10	VC_507_0	10	0.5771	1	0.5771	1	1	1	1
MGV-GENOME-0164406	Unassigned	Unassigned	Unassigned	852_0	Clustered	4	VC_852_0	4	0.6581	0.999942	0.6581	1	1	1	1
MGV-GENOME-0164410	Unassigned	Unassigned	Unassigned	1018_0	Clustered	3	VC_1018_0	3	0.3378	0.998006	0.3371	1	1	1	1
MGV-GENOME-0164412	Unassigned	Unassigned	Unassigned	794_0	Clustered	5	VC_794_0	5	0.476	1	0.476	1	1	1	1
MGV-GENOME-0164455	Unassigned	Unassigned	Unassigned	237_0	Clustered	7	VC_237_0	7	0.2353	1	0.2353	1	2	2	1
MGV-GENOME-0164552	Unassigned	Unassigned	Unassigned	338_0	Clustered	10	VC_338_0	10	0.4527	1	0.4527	1	1	1	1
MGV-GENOME-0164695	Unassigned	Unassigned	Unassigned	521_0	Clustered	28	VC_521_0	28	0.8264	1	0.8264	1	1	1	1
MGV-GENOME-0165018	Unassigned	Unassigned	Unassigned	652_0	Clustered	17	VC_652_0	17	0.5818	1	0.5818	1	1	1	1
MGV-GENOME-0165125	Unassigned	Unassigned	Unassigned	1098_0	Clustered	6	VC_1098_0	6	0.265	0.999712	0.2649	1	1	1	1
MGV-GENOME-0165158	Unassigned	Unassigned	Unassigned	507_0	Clustered	10	VC_507_0	10	0.5771	1	0.5771	1	1	1	1
MGV-GENOME-0165280	Unassigned	Unassigned	Unassigned	862_0	Clustered	7	VC_862_0	7	0.2163	1	0.2163	1	1	1	1
MGV-GENOME-0165398	Unassigned	Unassigned	Unassigned	230_0	Clustered	10	VC_230_0	10	0.532	1	0.532	1	2	2	0.9333
MGV-GENOME-0165522	Unassigned	Unassigned	Unassigned	1099_0	Clustered/Singleton	1	VC_1099_0	1	0	1	0	1	1	1	1
MGV-GENOME-0165538	Unassigned	Unassigned	Unassigned	867_0	Clustered	34	VC_867_0	34	0.8314	1	0.8314	1	1	1	1
MGV-GENOME-0165551	Unassigned	Unassigned	Unassigned	394_0	Clustered	22	VC_394_0	22	0.704	1	0.704	1	1	1	0.9827
MGV-GENOME-0165639	Unassigned	Unassigned	Unassigned	911_0	Clustered	11	VC_911_0	11	0.517	1	0.517	1	1	1	1
MGV-GENOME-0165655	Unassigned	Unassigned	Unassigned	643_0	Clustered	15	VC_643_0	15	0.5495	1	0.5495	1	1	1	1
MGV-GENOME-0165703	Unassigned	Unassigned	Unassigned	394_0	Clustered	22	VC_394_0	22	0.704	1	0.704	1	1	1	0.9827
MGV-GENOME-0165853	Unassigned	Unassigned	Unassigned	119_0	Clustered	58	VC_119_0	58	0.8362	1	0.8362	15	2	2	1
MGV-GENOME-0165871	Unassigned	Unassigned	Unassigned	521_0	Clustered	28	VC_521_0	28	0.8264	1	0.8264	1	1	1	1
MGV-GENOME-0165988	Unassigned	Unassigned	Unassigned	234_0	Clustered	31	VC_234_0	31	0.7417	1	0.7417	2	2	2	0.972
MGV-GENOME-0166050	Unassigned	Unassigned	Unassigned	511_0	Clustered	27	VC_511_0	27	0.7433	1	0.7433	1	1	1	0.9943
MGV-GENOME-0166056	Unassigned	Unassigned	Unassigned	1106_0	Clustered	10	VC_1106_0	10	0.5312	1	0.5312	1	1	1	1
MGV-GENOME-0166106	Unassigned	Unassigned	Unassigned	643_0	Clustered	15	VC_643_0	15	0.5495	1	0.5495	1	1	1	1
MGV-GENOME-0166162	Unassigned	Unassigned	Unassigned	629_0	Clustered	8	VC_629_0	8	0.6316	1	0.6316	1	1	1	1
MGV-GENOME-0166240	Unassigned	Unassigned	Unassigned	652_0	Clustered	17	VC_652_0	17	0.5818	1	0.5818	1	1	1	1
MGV-GENOME-0166251	Unassigned	Unassigned	Unassigned	601_0	Clustered	20	VC_601_0	20	0.6189	1	0.6189	1	1	1	0.9
MGV-GENOME-0166935	Unassigned	Unassigned	Unassigned	601_0	Clustered	20	VC_601_0	20	0.6189	1	0.6189	1	1	1	0.9
MGV-GENOME-0167026	Unassigned	Unassigned	Unassigned	650_0	Clustered	26	VC_650_0	26	0.5261	1	0.5261	1	1	1	0.92
MGV-GENOME-0167036	Unassigned	Unassigned	Unassigned	346_0	Clustered	30	VC_346_0	30	0.6158	1	0.6158	1	1	1	1
MGV-GENOME-0167121	Unassigned	Unassigned	Unassigned	616_1	Clustered	14	VC_616_1	14	0.3939	1	0.3939	1	1	1	0.7143
MGV-GENOME-0167141	Unassigned	Unassigned	Unassigned	616_1	Clustered	14	VC_616_1	14	0.3939	1	0.3939	1	1	1	0.7143
MGV-GENOME-0167179	Unassigned	Unassigned	Unassigned	278_0	Clustered	29	VC_278_0	29	0.7459	1	0.7459	1	1	1	0.9828
MGV-GENOME-0167310	Unassigned	Unassigned	Unassigned	944_0	Clustered	2	VC_944_0	2	0.0749	0.955634	0.0716	1	1	1	1
MGV-GENOME-0167689	Unassigned	Unassigned	Unassigned	650_0	Clustered	26	VC_650_0	26	0.5261	1	0.5261	1	1	1	0.92
MGV-GENOME-0167699	Unassigned	Unassigned	Unassigned	650_0	Clustered	26	VC_650_0	26	0.5261	1	0.5261	1	1	1	0.92
MGV-GENOME-0167855	Unassigned	Unassigned	Unassigned	649_0	Clustered	8	VC_649_0	8	0.3216	1	0.3216	1	1	1	1
MGV-GENOME-0167930	Unassigned	Unassigned	Unassigned	1113_0	Clustered	6	VC_1113_0	6	0.3373	1	0.3373	1	1	1	1
MGV-GENOME-0167957	Unassigned	Unassigned	Unassigned	1097_0	Clustered	16	VC_1097_0	16	0.9413	1	0.9413	1	1	1	1
MGV-GENOME-0168066	Unassigned	Unassigned	Unassigned	270_0	Clustered	8	VC_270_0	8	0.4243	1	0.4243	1	1	1	0.8214
MGV-GENOME-0168295	Unassigned	Unassigned	Unassigned	760_0	Clustered	9	VC_760_0	9	0.674	1	0.674	1	1	1	1
MGV-GENOME-0168311	Unassigned	Unassigned	Unassigned	875_0	Clustered	22	VC_875_0	22	0.7922	1	0.7922	1	1	1	1
MGV-GENOME-0168338	Unassigned	Unassigned	Unassigned	486_0	Clustered	3	VC_486_0	3	0.5354	0.99767	0.5342	1	1	1	1
MGV-GENOME-0168496	Unassigned	Unassigned	Unassigned	254_0	Clustered	43	VC_254_0	43	0.8474	1	0.8474	2	2	2	1
MGV-GENOME-0168561	Unassigned	Unassigned	Unassigned	1117_0	Clustered	6	VC_1117_0	6	0.969	1	0.969	1	1	1	1
MGV-GENOME-0168656	Unassigned	Unassigned	Unassigned	653_0	Clustered	21	VC_653_0	21	0.7793	1	0.7793	1	1	1	0.8571
MGV-GENOME-0168674	Unassigned	Unassigned	Unassigned	601_0	Clustered	20	VC_601_0	20	0.6189	1	0.6189	1	1	1	0.9
[truncated: 14,646 more rows]
