# Supplementary material for: Metagenomic analysis reveals unexplored diversity of archaeal virome in the human gut
Source: Nat Commun. 2022 Dec 29;13:7978. doi: 10.1038/s41467-022-35735-y (PMC9800368; doi:10.1038/s41467-022-35735-y)
Supplement: Supplementary file 14 — Data 10 [file 41467_2022_35735_MOESM14_ESM.xlsx]

## Sheet: Anosim analysis of virus
Groups	Statistic R	P value	Permutations
UK vs China	0.115	0.001	999
UK vs Austria	0.129	0.001	999
UK vs Danish	0.007	0.38	999
UK vs Spanish	-0.019	0.862	999
UK vs Tanzania	0.72	0.001	999
UK vs Italy	0.368	0.001	999
UK vs Russia	0.447	0.001	999
UK vs Finland	0.399	0.001	999
UK vs Estonia	0.167	0.005	999
UK vs France	0.001	0.408	999
UK vs Germany	-0.126	0.997	999
UK vs America	0.165	0.001	999
China vs Austria	0.315	0.001	999
China vs Danish	0.14	0.001	999
China vs Spanish	0.022	0.217	999
China vs Tanzania	0.735	0.001	999
China vs Italy	0.482	0.001	999
China vs Russia	0.425	0.001	999
China vs Finland	0.399	0.001	999
China vs Estonia	0.155	0.01	999
China vs France	0.132	0.001	999
China vs Germany	-0.015	0.588	999
China vs America	0.017	0.005	999
Austria vs Danish	0.093	0.001	999
Austria vs Spanish	0.128	0.001	999
Austria vs Tanzania	0.552	0.001	999
Austria vs Italy	0.163	0.001	999
Austria vs Russia	0.317	0.001	999
Austria vs Finland	0.253	0.001	999
Austria vs Estonia	0.172	0.002	999
Austria vs France	0.101	0.001	999
Austria vs Germany	-0.08	0.979	999
Austria vs America	0.391	0.001	999
Danish vs Spanish	0.061	0.001	999
Danish vs Tanzania	0.492	0.001	999
Danish vs Italy	0.35	0.001	999
Danish vs Russia	0.376	0.001	999
Danish vs Finland	0.339	0.001	999
Danish vs Estonia	0.181	0.001	999
Danish vs France	0.006	0.318	999
Danish vs Germany	-0.055	0.928	999
Danish vs America	0.216	0.001	999
Spanish vs Tanzania	0.655	0.001	999
Spanish vs Italy	0.376	0.001	999
Spanish vs Russia	0.376	0.001	999
Spanish vs Finland	0.342	0.001	999
Spanish vs Estonia	0.143	0.009	999
Spanish vs France	0.013	0.024	999
Spanish vs Germany	-0.047	0.833	999
Spanish vs America	0.106	0.001	999
Tanzania vs Italy	0.347	0.001	999
Tanzania vs Russia	0.259	0.001	999
Tanzania vs Finland	0.277	0.001	999
Tanzania vs Estonia	0.359	0.001	999
Tanzania vs France	0.616	0.001	999
Tanzania vs Germany	0.434	0.001	999
Tanzania vs America	0.704	0.001	999
Italy vs Russia	0.13	0.001	999
Italy vs Finland	0.11	0.001	999
Italy vs Estonia	0.125	0.002	999
Italy vs France	0.333	0.001	999
Italy vs Germany	0.054	0.043	999
Italy vs America	0.528	0.001	999
Russia vs Finland	0	0.419	999
Russia vs Estonia	-0.007	0.541	999
Russia vs France	0.396	0.001	999
Russia vs Germany	0.097	0.002	999
Russia vs America	0.431	0.001	999
Finland vs Estonia	-0.01	0.619	999
Finland vs France	0.353	0.001	999
Finland vs Germany	0.053	0.026	999
Finland vs America	0.417	0.001	999
Estonia vs France	0.146	0.011	999
Estonia vs Germany	0.067	0.005	999
Estonia vs America	0.178	0.006	999
France vs Germany	-0.116	0.996	999
France vs America	0.205	0.001	999
Germany vs America	0.107	0.038	999
