# Supplementary material for: Metagenomic analysis reveals unexplored diversity of archaeal virome in the human gut
Source: Nat Commun. 2022 Dec 29;13:7978. doi: 10.1038/s41467-022-35735-y (PMC9800368; doi:10.1038/s41467-022-35735-y)
Supplement: Supplementary file 15 — Data 11 [file 41467_2022_35735_MOESM15_ESM.xlsx]

## Sheet: a. IMG|UGV-GENOME-0271153
ORF Name	Match	Start	End	Length	Direction	Detection method	E value
IMG|UGV-GENOME-0271153_1	ASCH domain-containing protein	1	147	147	forward	blastX	5.8e-21
IMG|UGV-GENOME-0271153_2	hypothetical protein M. smithii	161	307	147	forward	blastX	1.4e-22
IMG|UGV-GENOME-0271153_3	hypothetical protein M. smithii	307	411	105	forward	blastX	7.4e-13
IMG|UGV-GENOME-0271153_4	hypothetical protein M. smithii	479	742	264	forward	blastX	1e-42
IMG|UGV-GENOME-0271153_5	hypothetical protein M. smithii	717	959	243	forward	blastX	2e-37
IMG|UGV-GENOME-0271153_6	hypothetical protein M. smithii	964	1278	315	forward	blastX	7e-43
IMG|UGV-GENOME-0271153_7	No significant similarity	1425	2129	705	reverse	blastX	NA
IMG|UGV-GENOME-0271153_8	No significant similarity	2302	2823	522	reverse	blastX	NA
IMG|UGV-GENOME-0271153_9	hypothetical protein M. smithii	3960	4130	171	forward	blastX	2.1e-17
IMG|UGV-GENOME-0271153_10	hypothetical protein M. smithii	4114	4419	306	forward	blastX	7.8e-31
IMG|UGV-GENOME-0271153_11	No significant similarity	4853	5410	558	forward	blastX	NA
IMG|UGV-GENOME-0271153_12	PBSX family terminase large subunit	5370	6683	1314	forward	HMM (pVOG)	6.8e-11
IMG|UGV-GENOME-0271153_13	portal protein	6680	7969	1290	forward	HMM (pVOG)	7.5e-08
IMG|UGV-GENOME-0271153_14	minor head protein GP7	7966	9474	1509	forward	HMM (pVOG)	3.1e-26
IMG|UGV-GENOME-0271153_15	hypothetical protein M. smithii	9533	9712	180	forward	blastX	4.3e-29
IMG|UGV-GENOME-0271153_16	phage prohead protease	10460	11545	1086	forward	HMM (pVOG)	4.5e-16
IMG|UGV-GENOME-0271153_17	No significant similarity	11550	12788	1239	forward	blastX	NA
IMG|UGV-GENOME-0271153_18	carboxypeptidase regulatory-like domain	12819	13208	390	forward	HMM (Pfam)	3.5e-08
IMG|UGV-GENOME-0271153_19	No significant similarity	13290	13868	579	forward	blastX	NA
IMG|UGV-GENOME-0271153_20	hypothetical protein M. oralis	13871	14227	357	forward	blastX	1.1e-20
IMG|UGV-GENOME-0271153_21	tail assembly chaperone	14211	14654	444	forward	HMM (pVOG)	1.3e-10
IMG|UGV-GENOME-0271153_22	No significant similarity	14662	15273	612	forward	blastX	NA
IMG|UGV-GENOME-0271153_23	hypothetical protein M. oralis	15270	15539	270	forward	blastX	8.2e-08
IMG|UGV-GENOME-0271153_24	No significant similarity	15565	16737	1173	forward	blastX	NA
IMG|UGV-GENOME-0271153_25	No significant similarity	16758	17165	408	forward	blastX	NA
IMG|UGV-GENOME-0271153_26	No significant similarity	17238	18002	765	forward	blastX	NA
IMG|UGV-GENOME-0271153_27	hypothetical protein M. oralis	18010	18189	180	forward	blastX	3.6e-07
IMG|UGV-GENOME-0271153_28	No significant similarity	18202	21795	3594	forward	blastX	NA
IMG|UGV-GENOME-0271153_29	No significant similarity	21798	22253	456	forward	blastX	NA
IMG|UGV-GENOME-0271153_30	transglutaminase-like superfamily M. oralis	22258	23316	1059	forward	HMM (Pfam)	1.4e-08
IMG|UGV-GENOME-0271153_31	hypothetical protein M. oralis	23331	24608	1278	forward	blastX	2.6e-67
IMG|UGV-GENOME-0271153_32	No significant similarity	24605	25294	690	forward	blastX	NA
IMG|UGV-GENOME-0271153_33	baseplate wedge protein	25297	25740	444	forward	HMM (pVOG)	2.2e-12
IMG|UGV-GENOME-0271153_34	baseplate J-like protein	25737	26906	1170	forward	HMM (Pfam)	2.7e-23
IMG|UGV-GENOME-0271153_35	No significant similarity	26857	29736	2880	forward	blastX	NA
IMG|UGV-GENOME-0271153_36	No significant similarity	29737	30000	264	forward	blastX	NA
IMG|UGV-GENOME-0271153_37	hypothetical protein M. oralis	29997	30677	681	forward	blastX	4.2e-24
IMG|UGV-GENOME-0271153_38	No significant similarity	30690	32987	2298	forward	blastX	NA
IMG|UGV-GENOME-0271153_39	hypothetical protein M. smithii	32999	33814	816	forward	blastX	6.1e-06
IMG|UGV-GENOME-0271153_40	No significant similarity	33856	34470	615	forward	blastX	NA
IMG|UGV-GENOME-0271153_41	No significant similarity	34502	35413	912	forward	blastX	NA
IMG|UGV-GENOME-0271153_42	phage tail repeat like	35500	36831	1332	forward	HMM (Pfam)	6.7e-10
IMG|UGV-GENOME-0271153_43	No significant similarity	36894	38096	1203	reverse	blastX	NA
IMG|UGV-GENOME-0271153_44	PeiW (phage psiM100), pseudomurein binding repeat protein	38440	39366	927	forward	blastX	5.30E-43, 6.70E-30
IMG|UGV-GENOME-0271153_45	No significant similarity	39372	39557	186	forward	blastX	NA
IMG|UGV-GENOME-0271153_46	hypothetical protein M. smithii	40049	40390	342	forward	blastX	2.4e-52

## Sheet: b. IMG|UGV-GENOME-0263128
ORF Name	Match	Start	End	Length	Direction	Detection method	E value
IMG|UGV-GENOME-0263128_1	hypothetical protein M. smithii	3	410	408	forward	blastX	1.3e-70
IMG|UGV-GENOME-0263128_2	hypothetical protein M. smithii	495	932	438	forward	blastX	5.7e-75
IMG|UGV-GENOME-0263128_3	hypothetical protein M. smithii	919	1155	237	forward	blastX	2.5e-37
IMG|UGV-GENOME-0263128_4	prominin (Methanobacterium virus Drs3)	1152	5810	4659	forward	blastX	5.4e-19
IMG|UGV-GENOME-0263128_5	hypothetical protein M. smithii	5817	6554	738	forward	blastX	5.9e-141
IMG|UGV-GENOME-0263128_6	Phage tail protein	6532	9402	2871	forward	HMM (Pfam)	8.9e-10
IMG|UGV-GENOME-0263128_7	hypothetical protein (Methanobacterium virus Drs3)	9408	11951	2544	forward	blastX	7.5e-07
IMG|UGV-GENOME-0263128_8	Phage tail repeat like	11948	13714	1767	forward	HMM (Pfam)	1.6e-08
IMG|UGV-GENOME-0263128_9	tail fiber protein	13741	14334	594	forward	HMM (pVOG)	7.9e-09
IMG|UGV-GENOME-0263128_10	hypothetical protein M. smithii	14360	14512	153	forward	blastX	5.5e-25
IMG|UGV-GENOME-0263128_11	PeiW-related protein (Methanothermobacter phage psiM100)	14505	15323	819	forward	HMM (pVOG)	1.5e-11
IMG|UGV-GENOME-0263128_12	No significant similarity	15613	15759	147	forward	blastX	NA
IMG|UGV-GENOME-0263128_13	hypothetical protein M. smithii	15799	16140	342	forward	blastX	7.6e-59
IMG|UGV-GENOME-0263128_14	integrase	16341	17495	1155	forward	HMM (pVOG)	3.7e-11
IMG|UGV-GENOME-0263128_15	No significant similarity	17566	17841	276	forward	blastX	NA
IMG|UGV-GENOME-0263128_16	No significant similarity	17861	18220	360	forward	blastX	NA
IMG|UGV-GENOME-0263128_17	No significant similarity	18225	18650	426	forward	blastX	NA
IMG|UGV-GENOME-0263128_18	hypothetical protein M. smithii	18693	19025	333	reverse	blastX	3.8e-47
IMG|UGV-GENOME-0263128_19	hypothetical protein (Methanothermobacter phage psiM100)	19749	20549	801	forward	blastX	6.8e-23
IMG|UGV-GENOME-0263128_20	hypothetical protein (Methanothermobacter phage psiM100)	20592	20855	264	forward	blastX	3.5e-08
IMG|UGV-GENOME-0263128_21	hypothetical protein M. smithii	20916	21377	462	forward	blastX	1.8e-79
IMG|UGV-GENOME-0263128_22	phage antirepressor	21565	22389	825	forward	blastX	3.3e-113
IMG|UGV-GENOME-0263128_23	No significant similarity	22690	22863	174	reverse	blastX	NA
IMG|UGV-GENOME-0263128_24	hypothetical protein M. smithii	23005	23193	189	forward	blastX	2.8e-18
IMG|UGV-GENOME-0263128_25	hypothetical protein M. smithii	23190	23402	213	forward	blastX	3.4e-33
IMG|UGV-GENOME-0263128_26	hypothetical protein M. smithii	23415	23690	276	forward	blastX	7e-47
IMG|UGV-GENOME-0263128_27	hypothetical protein M. smithii	23687	23866	180	forward	blastX	5.6e-29
IMG|UGV-GENOME-0263128_28	hypothetical protein M. smithii	23863	24159	297	forward	blastX	3.1e-48
IMG|UGV-GENOME-0263128_29	essential recombination function protein	24162	24764	603	forward	HMM (pVOG)	3.1e-25
IMG|UGV-GENOME-0263128_30	hypothetical protein M. smithii	24951	25262	312	forward	blastX	5.3e-51
IMG|UGV-GENOME-0263128_31	hypothetical protein M. smithii	25339	25755	417	forward	blastX	9.9e-53
IMG|UGV-GENOME-0263128_32	No significant similarity	25779	25961	183	forward	blastX	NA
IMG|UGV-GENOME-0263128_33	hypothetical protein M. smithii	25958	26086	129	forward	blastX	1.6e-17
IMG|UGV-GENOME-0263128_34	hypothetical protein M. smithii	26275	26538	264	forward	blastX	1.1e-44
IMG|UGV-GENOME-0263128_35	hypothetical protein M. smithii	26513	26755	243	forward	blastX	2.4e-38
IMG|UGV-GENOME-0263128_36	hypothetical protein M. smithii	26762	27076	315	forward	blastX	7.2e-56
IMG|UGV-GENOME-0263128_37	hypothetical protein M. smithii	27073	27330	258	forward	blastX	2e-43
IMG|UGV-GENOME-0263128_38	hypothetical protein M. smithii	28122	28295	174	forward	blastX	5.6e-26
IMG|UGV-GENOME-0263128_39	hypothetical protein M. smithii	28285	28584	300	forward	blastX	2.5e-37
IMG|UGV-GENOME-0263128_40	hypothetical protein M. smithii	28743	29336	594	forward	blastX	1.4e-108
IMG|UGV-GENOME-0263128_41	terminase large subunit (Methanothermobacter phage psiM100)	29333	30691	1359	forward	HMM (pVOG)	1.1e-17
IMG|UGV-GENOME-0263128_42	portal protein (Methanobacterium phage psiM2)	30694	32088	1395	forward	HMM (pVOG)	1.1e-26
IMG|UGV-GENOME-0263128_43	minor head protein	32108	33706	1599	forward	HMM (pVOG)	8.4e-11
IMG|UGV-GENOME-0263128_44	hypothetical protein M. smithii	33723	33956	234	forward	blastX	2e-42
IMG|UGV-GENOME-0263128_45	structural protein (Methanothermobacter phage psiM100)	34529	34876	348	forward	blastX	6.2e-37
IMG|UGV-GENOME-0263128_46	hypothetical protein M. smithii	34879	35496	618	forward	blastX	3e-74
IMG|UGV-GENOME-0263128_47	major capsid protein	35554	36564	1011	forward	HMM (pVOG)	5.9e-07
IMG|UGV-GENOME-0263128_48	hypothetical protein M. smithii	36852	37217	366	forward	blastX	4.5e-65
IMG|UGV-GENOME-0263128_49	hypothetical protein M. smithii	37258	37701	444	forward	blastX	5e-79
IMG|UGV-GENOME-0263128_50	hypothetical protein M. smithii	37698	38159	462	forward	blastX	4.6e-83
IMG|UGV-GENOME-0263128_51	hypothetical protein (Methanobacterium virus Drs3)	38165	39001	837	forward	blastX	1.8e-13
