# Supplementary material for: Metagenomic analysis reveals unexplored diversity of archaeal virome in the human gut
Source: Nat Commun. 2022 Dec 29;13:7978. doi: 10.1038/s41467-022-35735-y (PMC9800368; doi:10.1038/s41467-022-35735-y)
Supplement: Supplementary file 17 — Data 13 [file 41467_2022_35735_MOESM17_ESM.xlsx]

## Sheet: VC_323
ORF Name	Pfam	Pfam_description	NR_description
provir|Feng_Q_2015_NC_ERR688580.NODE_36_141307_1	No significant similarity	No significant similarity	site-specific_integrase
provir|Feng_Q_2015_NC_ERR688580.NODE_36_141307_2	No significant similarity	No significant similarity	No significant similarity
provir|Feng_Q_2015_NC_ERR688580.NODE_36_141307_3	No significant similarity	No significant similarity	No significant similarity
provir|Feng_Q_2015_NC_ERR688580.NODE_36_141307_4	No significant similarity	No significant similarity	No significant similarity
provir|Feng_Q_2015_NC_ERR688580.NODE_36_141307_5	No significant similarity	No significant similarity	MULTISPECIES:_PeiW-related_protein_(phage_psiM100)
provir|Feng_Q_2015_NC_ERR688580.NODE_36_141307_6	No significant similarity	No significant similarity	hypothetical_protein_B655_2212
provir|Feng_Q_2015_NC_ERR688580.NODE_36_141307_7	PTR	Phage tail repeat like	hypothetical_protein
provir|Feng_Q_2015_NC_ERR688580.NODE_36_141307_8	No significant similarity	No significant similarity	No significant similarity
provir|Feng_Q_2015_NC_ERR688580.NODE_36_141307_9	No significant similarity	No significant similarity	No significant similarity
provir|Feng_Q_2015_NC_ERR688580.NODE_36_141307_10	No significant similarity	No significant similarity	No significant similarity
provir|Feng_Q_2015_NC_ERR688580.NODE_36_141307_11	No significant similarity	No significant similarity	hypothetical_protein
provir|Feng_Q_2015_NC_ERR688580.NODE_36_141307_12	No significant similarity	No significant similarity	hypothetical_protein
provir|Feng_Q_2015_NC_ERR688580.NODE_36_141307_13	No significant similarity	No significant similarity	hypothetical_protein
provir|Feng_Q_2015_NC_ERR688580.NODE_36_141307_14	No significant similarity	No significant similarity	domain-containing_protein
provir|Feng_Q_2015_NC_ERR688580.NODE_36_141307_15	Baseplate_J	Baseplate J-like protein	baseplate_J/gp47_family_protein
provir|Feng_Q_2015_NC_ERR688580.NODE_36_141307_16	DUF2634	Protein of unknown function (DUF2634)	hypothetical_protein
provir|Feng_Q_2015_NC_ERR688580.NODE_36_141307_17	No significant similarity	No significant similarity	hypothetical_protein
provir|Feng_Q_2015_NC_ERR688580.NODE_36_141307_18	No significant similarity	No significant similarity	hypothetical_protein
provir|Feng_Q_2015_NC_ERR688580.NODE_36_141307_19	Transglut_core	Transglutaminase-like superfamily	transglutaminase_domain-containing_protein
provir|Feng_Q_2015_NC_ERR688580.NODE_36_141307_20	No significant similarity	No significant similarity	No significant similarity
provir|Feng_Q_2015_NC_ERR688580.NODE_36_141307_21	SesA	N-terminal domain on NACHT_NTPase and P-loop NTPases	hypothetical_protein_[Methanobrevibacter_oralis]
provir|Feng_Q_2015_NC_ERR688580.NODE_36_141307_22	No significant similarity	No significant similarity	No significant similarity
provir|Feng_Q_2015_NC_ERR688580.NODE_36_141307_23	No significant similarity	No significant similarity	No significant similarity
provir|Feng_Q_2015_NC_ERR688580.NODE_36_141307_24	No significant similarity	No significant similarity	No significant similarity
provir|Feng_Q_2015_NC_ERR688580.NODE_36_141307_25	No significant similarity	No significant similarity	hypothetical_protein
provir|Feng_Q_2015_NC_ERR688580.NODE_36_141307_26	No significant similarity	No significant similarity	No significant similarity
provir|Feng_Q_2015_NC_ERR688580.NODE_36_141307_27	No significant similarity	No significant similarity	hypothetical_protein
provir|Feng_Q_2015_NC_ERR688580.NODE_36_141307_28	No significant similarity	No significant similarity	HK97_gp10_family_phage_protein
provir|Feng_Q_2015_NC_ERR688580.NODE_36_141307_29	No significant similarity	No significant similarity	hypothetical_protein
provir|Feng_Q_2015_NC_ERR688580.NODE_36_141307_30	No significant similarity	No significant similarity	hypothetical_protein
provir|Feng_Q_2015_NC_ERR688580.NODE_36_141307_31	CarboxypepD_reg	Carboxypeptidase regulatory-like domain	No significant similarity
provir|Feng_Q_2015_NC_ERR688580.NODE_36_141307_32	DUF5309	Family of unknown function (DUF5309)	hypothetical_protein
provir|Feng_Q_2015_NC_ERR688580.NODE_36_141307_33	No significant similarity	No significant similarity	hypothetical_protein
provir|Feng_Q_2015_NC_ERR688580.NODE_36_141307_34	No significant similarity	No significant similarity	hypothetical_protein
provir|Feng_Q_2015_NC_ERR688580.NODE_36_141307_35	No significant similarity	No significant similarity	hypothetical_protein
provir|Feng_Q_2015_NC_ERR688580.NODE_36_141307_36	No significant similarity	No significant similarity	hypothetical_protein
provir|Feng_Q_2015_NC_ERR688580.NODE_36_141307_37	Phage_Mu_F	Phage Mu protein F like protein	hypothetical_protein
provir|Feng_Q_2015_NC_ERR688580.NODE_36_141307_38	Phage_portal	Phage portal protein	hypothetical_protein
provir|Feng_Q_2015_NC_ERR688580.NODE_36_141307_39	Terminase_6	Terminase-like family	PBSX_family_phage_terminase_large_subunit
provir|Feng_Q_2015_NC_ERR688580.NODE_36_141307_40	No significant similarity	No significant similarity	hypothetical_protein
provir|Feng_Q_2015_NC_ERR688580.NODE_36_141307_41	No significant similarity	No significant similarity	No significant similarity
provir|Feng_Q_2015_NC_ERR688580.NODE_36_141307_42	No significant similarity	No significant similarity	No significant similarity
provir|Feng_Q_2015_NC_ERR688580.NODE_36_141307_43	No significant similarity	No significant similarity	No significant similarity
provir|Feng_Q_2015_NC_ERR688580.NODE_36_141307_44	No significant similarity	No significant similarity	No significant similarity
provir|Feng_Q_2015_NC_ERR688580.NODE_36_141307_45	ERCC4	ERCC4 domain	ERCC4-type_nuclease
provir|Feng_Q_2015_NC_ERR688580.NODE_36_141307_46	No significant similarity	No significant similarity	No significant similarity
provir|Feng_Q_2015_NC_ERR688580.NODE_36_141307_47	No significant similarity	No significant similarity	No significant similarity
provir|Feng_Q_2015_NC_ERR688580.NODE_36_141307_48	No significant similarity	No significant similarity	No significant similarity
provir|Feng_Q_2015_NC_ERR688580.NODE_36_141307_49	No significant similarity	No significant similarity	No significant similarity
provir|Feng_Q_2015_NC_ERR688580.NODE_36_141307_50	No significant similarity	No significant similarity	No significant similarity
provir|Feng_Q_2015_NC_ERR688580.NODE_36_141307_51	Helicase_C_2	Helicase C-terminal domain	DEAD/DEAH_box_helicase_family_protein
provir|Feng_Q_2015_NC_ERR688580.NODE_36_141307_52	No significant similarity	No significant similarity	No significant similarity
provir|Xie_HL_2016_CS_37097.scaffold6951_6_91880_1_1	No significant similarity	No significant similarity	No significant similarity
provir|Xie_HL_2016_CS_37097.scaffold6951_6_91880_1_2	No significant similarity	No significant similarity	No significant similarity
provir|Xie_HL_2016_CS_37097.scaffold6951_6_91880_1_3	No significant similarity	No significant similarity	hypothetical_protein
provir|Xie_HL_2016_CS_37097.scaffold6951_6_91880_1_4	No significant similarity	No significant similarity	hypothetical_protein
provir|Xie_HL_2016_CS_37097.scaffold6951_6_91880_1_5	No significant similarity	No significant similarity	hypothetical_protein
provir|Xie_HL_2016_CS_37097.scaffold6951_6_91880_1_6	No significant similarity	No significant similarity	No significant similarity
provir|Xie_HL_2016_CS_37097.scaffold6951_6_91880_1_7	No significant similarity	No significant similarity	DUF1565_domain-containing_protein
provir|Xie_HL_2016_CS_37097.scaffold6951_6_91880_1_8	Baseplate_J	Baseplate J-like protein	hypothetical_protein
provir|Xie_HL_2016_CS_37097.scaffold6951_6_91880_1_9	DUF2634	Protein of unknown function (DUF2634)	hypothetical_protein
provir|Xie_HL_2016_CS_37097.scaffold6951_6_91880_1_10	No significant similarity	No significant similarity	hypothetical_protein
provir|Xie_HL_2016_CS_37097.scaffold6951_6_91880_1_11	No significant similarity	No significant similarity	hypothetical_protein
provir|Xie_HL_2016_CS_37097.scaffold6951_6_91880_1_12	Transglut_core	Transglutaminase-like superfamily	transglutaminase_domain-containing_protein
provir|Xie_HL_2016_CS_37097.scaffold6951_6_91880_1_13	No significant similarity	No significant similarity	No significant similarity
provir|Xie_HL_2016_CS_37097.scaffold6951_6_91880_1_14	SesA	N-terminal domain on NACHT_NTPase and P-loop NTPases	hypothetical_protein
provir|Xie_HL_2016_CS_37097.scaffold6951_6_91880_1_15	No significant similarity	No significant similarity	No significant similarity
provir|Xie_HL_2016_CS_37097.scaffold6951_6_91880_1_16	No significant similarity	No significant similarity	hypothetical_protein
provir|Xie_HL_2016_CS_37097.scaffold6951_6_91880_1_17	No significant similarity	No significant similarity	No significant similarity
provir|Xie_HL_2016_CS_37097.scaffold6951_6_91880_1_18	No significant similarity	No significant similarity	hypothetical_protein
provir|Xie_HL_2016_CS_37097.scaffold6951_6_91880_1_19	No significant similarity	No significant similarity	No significant similarity
provir|Xie_HL_2016_CS_37097.scaffold6951_6_91880_1_20	No significant similarity	No significant similarity	hypothetical_protein
provir|Xie_HL_2016_CS_37097.scaffold6951_6_91880_1_21	No significant similarity	No significant similarity	HK97_gp10_family_phage_protein
provir|Xie_HL_2016_CS_37097.scaffold6951_6_91880_1_22	No significant similarity	No significant similarity	hypothetical_protein
provir|Xie_HL_2016_CS_37097.scaffold6951_6_91880_1_23	No significant similarity	No significant similarity	No significant similarity
provir|Xie_HL_2016_CS_37097.scaffold6951_6_91880_1_24	CarboxypepD_reg	Carboxypeptidase regulatory-like domain	MULTISPECIES:_carboxypeptidase_regulatory-like_domain-containing_protein
provir|Xie_HL_2016_CS_37097.scaffold6951_6_91880_1_25	DUF5309	Family of unknown function (DUF5309)	No significant similarity
provir|Xie_HL_2016_CS_37097.scaffold6951_6_91880_1_26	No significant similarity	No significant similarity	hypothetical_protein
provir|Xie_HL_2016_CS_37097.scaffold6951_6_91880_1_27	No significant similarity	No significant similarity	hypothetical_protein_METSMIF1_03375
provir|Xie_HL_2016_CS_37097.scaffold6951_6_91880_1_28	No significant similarity	No significant similarity	hypothetical_protein
provir|Xie_HL_2016_CS_37097.scaffold6951_6_91880_1_29	No significant similarity	No significant similarity	hypothetical_protein
provir|Xie_HL_2016_CS_37097.scaffold6951_6_91880_1_30	Phage_Mu_F	Phage Mu protein F like protein	hypothetical_protein
provir|Xie_HL_2016_CS_37097.scaffold6951_6_91880_1_31	Phage_portal	Phage portal protein	phage_portal_protein
provir|Xie_HL_2016_CS_37097.scaffold6951_6_91880_1_32	Terminase_6	Terminase-like family	PBSX_family_phage_terminase_large_subunit
provir|Xie_HL_2016_CS_37097.scaffold6951_6_91880_1_33	No significant similarity	No significant similarity	hypothetical_protein
provir|Xie_HL_2016_CS_37097.scaffold6951_6_91880_1_34	No significant similarity	No significant similarity	No significant similarity
provir|Xie_HL_2016_CS_37097.scaffold6951_6_91880_1_35	No significant similarity	No significant similarity	MULTISPECIES:_hypothetical_protein
provir|Xie_HL_2016_CS_37097.scaffold6951_6_91880_1_36	No significant similarity	No significant similarity	hypothetical_protein_Msm_1668
provir|Xie_HL_2016_CS_37097.scaffold6951_6_91880_1_37	No significant similarity	No significant similarity	No significant similarity
provir|Xie_HL_2016_CS_37097.scaffold6951_6_91880_1_38	DUF2326	Uncharacterised protein conserved in bacteria (DUF2326)	DUF2326_domain-containing_protein
provir|Xie_HL_2016_CS_37097.scaffold6951_6_91880_1_39	No significant similarity	No significant similarity	hypothetical_protein
provir|Xie_HL_2016_CS_37097.scaffold6951_6_91880_1_40	HNH	HNH endonuclease	HNH_endonuclease
provir|Xie_HL_2016_CS_37097.scaffold6951_6_91880_1_41	No significant similarity	No significant similarity	MULTISPECIES:_hypothetical_protein
provir|Xie_HL_2016_CS_37097.scaffold6951_6_91880_1_42	No significant similarity	No significant similarity	hypothetical_protein
provir|Xie_HL_2016_CS_37097.scaffold6951_6_91880_1_43	No significant similarity	No significant similarity	hypothetical_protein
provir|Xie_HL_2016_CS_37097.scaffold6951_6_91880_1_44	No significant similarity	No significant similarity	hypothetical_protein_Msm_1662
provir|Xie_HL_2016_CS_37097.scaffold6951_6_91880_1_45	ASCH	ASCH domain	MULTISPECIES:_ASCH_domain-containing_protein
provir|Xie_HL_2016_CS_37097.scaffold6951_6_91880_1_46	No significant similarity	No significant similarity	MULTISPECIES:_hypothetical_protein
provir|Xie_HL_2016_CS_37097.scaffold6951_6_91880_1_47	No significant similarity	No significant similarity	No significant similarity
provir|Xie_HL_2016_CS_37097.scaffold6951_6_91880_1_48	No significant similarity	No significant similarity	hypothetical_protein
provir|Xie_HL_2016_CS_37097.scaffold6951_6_91880_1_49	No significant similarity	No significant similarity	MarR_family_transcriptional_regulator
provir|Xie_HL_2016_CS_37097.scaffold6951_6_91880_1_50	No significant similarity	No significant similarity	No significant similarity
provir|Xie_HL_2016_CS_37097.scaffold6951_6_91880_1_51	No significant similarity	No significant similarity	No significant similarity
provir|Xie_HL_2016_CS_37097.scaffold6951_6_91880_1_52	ERF	ERF superfamily	hypothetical_protein
provir|Xie_HL_2016_CS_37097.scaffold6951_6_91880_1_53	No significant similarity	No significant similarity	hypothetical_protein
provir|Xie_HL_2016_CS_37097.scaffold6951_6_91880_1_54	No significant similarity	No significant similarity	hypothetical_protein
provir|Xie_HL_2016_CS_37097.scaffold6951_6_91880_1_55	No significant similarity	No significant similarity	MULTISPECIES:_hypothetical_protein
provir|Xie_HL_2016_CS_37097.scaffold6951_6_91880_1_56	No significant similarity	No significant similarity	MULTISPECIES:_hypothetical_protein
provir|Xie_HL_2016_CS_37097.scaffold6951_6_91880_1_57	No significant similarity	No significant similarity	hypothetical_protein_Msm_1648
provir|Feng_Q_2015_NC_ERR688567.NODE_108_91642_1_1	PTR	Phage tail repeat like	hypothetical_protein_Msm_1688
provir|Feng_Q_2015_NC_ERR688567.NODE_108_91642_1_2	No significant similarity	No significant similarity	No significant similarity
provir|Feng_Q_2015_NC_ERR688567.NODE_108_91642_1_3	No significant similarity	No significant similarity	No significant similarity
provir|Feng_Q_2015_NC_ERR688567.NODE_108_91642_1_4	No significant similarity	No significant similarity	hypothetical_protein
provir|Feng_Q_2015_NC_ERR688567.NODE_108_91642_1_5	No significant similarity	No significant similarity	hypothetical_protein
provir|Feng_Q_2015_NC_ERR688567.NODE_108_91642_1_6	No significant similarity	No significant similarity	hypothetical_protein
provir|Feng_Q_2015_NC_ERR688567.NODE_108_91642_1_7	No significant similarity	No significant similarity	No significant similarity
provir|Feng_Q_2015_NC_ERR688567.NODE_108_91642_1_8	No significant similarity	No significant similarity	DUF1565_domain-containing_protein
provir|Feng_Q_2015_NC_ERR688567.NODE_108_91642_1_9	Baseplate_J	Baseplate J-like protein	hypothetical_protein
provir|Feng_Q_2015_NC_ERR688567.NODE_108_91642_1_10	DUF2634	Protein of unknown function (DUF2634)	hypothetical_protein
provir|Feng_Q_2015_NC_ERR688567.NODE_108_91642_1_11	No significant similarity	No significant similarity	hypothetical_protein
provir|Feng_Q_2015_NC_ERR688567.NODE_108_91642_1_12	No significant similarity	No significant similarity	hypothetical_protein
provir|Feng_Q_2015_NC_ERR688567.NODE_108_91642_1_13	Transglut_core	Transglutaminase-like superfamily	transglutaminase_domain-containing_protein
provir|Feng_Q_2015_NC_ERR688567.NODE_108_91642_1_14	No significant similarity	No significant similarity	No significant similarity
provir|Feng_Q_2015_NC_ERR688567.NODE_108_91642_1_15	SesA	N-terminal domain on NACHT_NTPase and P-loop NTPases	hypothetical_protein
provir|Feng_Q_2015_NC_ERR688567.NODE_108_91642_1_16	No significant similarity	No significant similarity	No significant similarity
provir|Feng_Q_2015_NC_ERR688567.NODE_108_91642_1_17	No significant similarity	No significant similarity	hypothetical_protein_BZ138_06015
provir|Feng_Q_2015_NC_ERR688567.NODE_108_91642_1_18	No significant similarity	No significant similarity	No significant similarity
provir|Feng_Q_2015_NC_ERR688567.NODE_108_91642_1_19	No significant similarity	No significant similarity	hypothetical_protein
provir|Feng_Q_2015_NC_ERR688567.NODE_108_91642_1_20	No significant similarity	No significant similarity	No significant similarity
provir|Feng_Q_2015_NC_ERR688567.NODE_108_91642_1_21	No significant similarity	No significant similarity	hypothetical_protein
provir|Feng_Q_2015_NC_ERR688567.NODE_108_91642_1_22	No significant similarity	No significant similarity	HK97_gp10_family_phage_protein
provir|Feng_Q_2015_NC_ERR688567.NODE_108_91642_1_23	No significant similarity	No significant similarity	hypothetical_protein
provir|Feng_Q_2015_NC_ERR688567.NODE_108_91642_1_24	No significant similarity	No significant similarity	No significant similarity
provir|Feng_Q_2015_NC_ERR688567.NODE_108_91642_1_25	CarboxypepD_reg	Carboxypeptidase regulatory-like domain	MULTISPECIES:_carboxypeptidase_regulatory-like_domain-containing_protein
provir|Feng_Q_2015_NC_ERR688567.NODE_108_91642_1_26	DUF5309	Family of unknown function (DUF5309)	No significant similarity
provir|Feng_Q_2015_NC_ERR688567.NODE_108_91642_1_27	No significant similarity	No significant similarity	hypothetical_protein
provir|Feng_Q_2015_NC_ERR688567.NODE_108_91642_1_28	No significant similarity	No significant similarity	No significant similarity
provir|Feng_Q_2015_NC_ERR688567.NODE_108_91642_1_29	No significant similarity	No significant similarity	hypothetical_protein
provir|Feng_Q_2015_NC_ERR688567.NODE_108_91642_1_30	Phage_Mu_F	Phage Mu protein F like protein	hypothetical_protein
provir|Feng_Q_2015_NC_ERR688567.NODE_108_91642_1_31	Phage_portal	Phage portal protein	phage_portal_protein
provir|Feng_Q_2015_NC_ERR688567.NODE_108_91642_1_32	Terminase_6	Terminase-like family	PBSX_family_phage_terminase_large_subunit
provir|Feng_Q_2015_NC_ERR688567.NODE_108_91642_1_33	No significant similarity	No significant similarity	hypothetical_protein
provir|Feng_Q_2015_NC_ERR688567.NODE_108_91642_1_34	No significant similarity	No significant similarity	MULTISPECIES:_hypothetical_protein
provir|Feng_Q_2015_NC_ERR688567.NODE_108_91642_1_35	No significant similarity	No significant similarity	hypothetical_protein_Msm_1668
provir|Feng_Q_2015_NC_ERR688567.NODE_108_91642_1_36	No significant similarity	No significant similarity	No significant similarity
provir|Feng_Q_2015_NC_ERR688567.NODE_108_91642_1_37	DUF2326	Uncharacterised protein conserved in bacteria (DUF2326)	DUF2326_domain-containing_protein
provir|Feng_Q_2015_NC_ERR688567.NODE_108_91642_1_38	No significant similarity	No significant similarity	hypothetical_protein
provir|Feng_Q_2015_NC_ERR688567.NODE_108_91642_1_39	HNH	HNH endonuclease	HNH_endonuclease
provir|Feng_Q_2015_NC_ERR688567.NODE_108_91642_1_40	No significant similarity	No significant similarity	MULTISPECIES:_hypothetical_protein
provir|Feng_Q_2015_NC_ERR688567.NODE_108_91642_1_41	No significant similarity	No significant similarity	hypothetical_protein
provir|Feng_Q_2015_NC_ERR688567.NODE_108_91642_1_42	No significant similarity	No significant similarity	hypothetical_protein
provir|Feng_Q_2015_NC_ERR688567.NODE_108_91642_1_43	No significant similarity	No significant similarity	hypothetical_protein_Msm_1662
provir|Feng_Q_2015_NC_ERR688567.NODE_108_91642_1_44	No significant similarity	No significant similarity	MULTISPECIES:_ASCH_domain-containing_protein
provir|Feng_Q_2015_NC_ERR688567.NODE_108_91642_1_45	No significant similarity	No significant similarity	MULTISPECIES:_hypothetical_protein
provir|Feng_Q_2015_NC_ERR688567.NODE_108_91642_1_46	No significant similarity	No significant similarity	hypothetical_protein_Msm_1659
provir|Feng_Q_2015_NC_ERR688567.NODE_108_91642_1_47	No significant similarity	No significant similarity	hypothetical_protein
provir|Feng_Q_2015_NC_ERR688567.NODE_108_91642_1_48	No significant similarity	No significant similarity	hypothetical_protein
provir|Feng_Q_2015_NC_ERR688567.NODE_108_91642_1_49	No significant similarity	No significant similarity	hypothetical_protein
provir|Feng_Q_2015_NC_ERR688567.NODE_108_91642_1_50	ERF	ERF superfamily	hypothetical_protein
provir|Feng_Q_2015_NC_ERR688567.NODE_108_91642_1_51	No significant similarity	No significant similarity	hypothetical_protein
provir|Feng_Q_2015_NC_ERR688567.NODE_108_91642_1_52	No significant similarity	No significant similarity	hypothetical_protein
provir|Feng_Q_2015_NC_ERR688567.NODE_108_91642_1_53	No significant similarity	No significant similarity	MULTISPECIES:_hypothetical_protein
provir|Feng_Q_2015_NC_ERR688567.NODE_108_91642_1_54	No significant similarity	No significant similarity	MULTISPECIES:_hypothetical_protein
provir|Feng_Q_2015_NC_ERR688567.NODE_108_91642_1_55	No significant similarity	No significant similarity	hypothetical_protein_Msm_1648
provir|Feng_Q_2015_NC_ERR688567.NODE_108_91642_1_56	MazE_antitoxin	Antidote-toxin recognition MazE, bacterial antitoxin	No significant similarity
provir|Xie_HL_2016_CS_37201.scaffold837_1_124807_1_1	No significant similarity	No significant similarity	AbrB/MazE/SpoVT_family_DNA-binding_domain-containing_protein
provir|Xie_HL_2016_CS_37201.scaffold837_1_124807_1_2	No significant similarity	No significant similarity	hypothetical_protein_Msm_1648
provir|Xie_HL_2016_CS_37201.scaffold837_1_124807_1_3	No significant similarity	No significant similarity	MULTISPECIES:_hypothetical_protein
provir|Xie_HL_2016_CS_37201.scaffold837_1_124807_1_4	No significant similarity	No significant similarity	hypothetical_protein
provir|Xie_HL_2016_CS_37201.scaffold837_1_124807_1_5	No significant similarity	No significant similarity	hypothetical_protein
provir|Xie_HL_2016_CS_37201.scaffold837_1_124807_1_6	No significant similarity	No significant similarity	No significant similarity
provir|Xie_HL_2016_CS_37201.scaffold837_1_124807_1_7	ERF	ERF superfamily	hypothetical_protein
provir|Xie_HL_2016_CS_37201.scaffold837_1_124807_1_8	No significant similarity	No significant similarity	No significant similarity
provir|Xie_HL_2016_CS_37201.scaffold837_1_124807_1_9	No significant similarity	No significant similarity	No significant similarity
provir|Xie_HL_2016_CS_37201.scaffold837_1_124807_1_10	No significant similarity	No significant similarity	MarR_family_transcriptional_regulator
provir|Xie_HL_2016_CS_37201.scaffold837_1_124807_1_11	No significant similarity	No significant similarity	hypothetical_protein
provir|Xie_HL_2016_CS_37201.scaffold837_1_124807_1_12	No significant similarity	No significant similarity	hypothetical_protein_Msm_1659
provir|Xie_HL_2016_CS_37201.scaffold837_1_124807_1_13	No significant similarity	No significant similarity	MULTISPECIES:_hypothetical_protein
provir|Xie_HL_2016_CS_37201.scaffold837_1_124807_1_14	No significant similarity	No significant similarity	MULTISPECIES:_ASCH_domain-containing_protein
provir|Xie_HL_2016_CS_37201.scaffold837_1_124807_1_15	No significant similarity	No significant similarity	hypothetical_protein_Msm_1662
provir|Xie_HL_2016_CS_37201.scaffold837_1_124807_1_16	No significant similarity	No significant similarity	No significant similarity
provir|Xie_HL_2016_CS_37201.scaffold837_1_124807_1_17	No significant similarity	No significant similarity	hypothetical_protein
provir|Xie_HL_2016_CS_37201.scaffold837_1_124807_1_18	No significant similarity	No significant similarity	hypothetical_protein
provir|Xie_HL_2016_CS_37201.scaffold837_1_124807_1_19	No significant similarity	No significant similarity	MULTISPECIES:_hypothetical_protein
provir|Xie_HL_2016_CS_37201.scaffold837_1_124807_1_20	No significant similarity	No significant similarity	No significant similarity
provir|Xie_HL_2016_CS_37201.scaffold837_1_124807_1_21	No significant similarity	No significant similarity	hypothetical_protein_Msm_1668
provir|Xie_HL_2016_CS_37201.scaffold837_1_124807_1_22	No significant similarity	No significant similarity	MULTISPECIES:_hypothetical_protein
provir|Xie_HL_2016_CS_37201.scaffold837_1_124807_1_23	No significant similarity	No significant similarity	hypothetical_protein
provir|Xie_HL_2016_CS_37201.scaffold837_1_124807_1_24	Terminase_6	Terminase-like family	PBSX_family_phage_terminase_large_subunit
provir|Xie_HL_2016_CS_37201.scaffold837_1_124807_1_25	Phage_portal	Phage portal protein	phage_portal_protein
provir|Xie_HL_2016_CS_37201.scaffold837_1_124807_1_26	Phage_Mu_F	Phage Mu protein F like protein	hypothetical_protein
provir|Xie_HL_2016_CS_37201.scaffold837_1_124807_1_27	No significant similarity	No significant similarity	MULTISPECIES:_hypothetical_protein
provir|Xie_HL_2016_CS_37201.scaffold837_1_124807_1_28	No significant similarity	No significant similarity	hypothetical_protein
provir|Xie_HL_2016_CS_37201.scaffold837_1_124807_1_29	No significant similarity	No significant similarity	hypothetical_protein
provir|Xie_HL_2016_CS_37201.scaffold837_1_124807_1_30	DUF5309	Family of unknown function (DUF5309)	No significant similarity
provir|Xie_HL_2016_CS_37201.scaffold837_1_124807_1_31	CarboxypepD_reg	Carboxypeptidase regulatory-like domain	MULTISPECIES:_carboxypeptidase_regulatory-like_domain-containing_protein
provir|Xie_HL_2016_CS_37201.scaffold837_1_124807_1_32	No significant similarity	No significant similarity	No significant similarity
provir|Xie_HL_2016_CS_37201.scaffold837_1_124807_1_33	No significant similarity	No significant similarity	hypothetical_protein
provir|Xie_HL_2016_CS_37201.scaffold837_1_124807_1_34	No significant similarity	No significant similarity	HK97_gp10_family_phage_protein
provir|Xie_HL_2016_CS_37201.scaffold837_1_124807_1_35	No significant similarity	No significant similarity	hypothetical_protein
provir|Xie_HL_2016_CS_37201.scaffold837_1_124807_1_36	No significant similarity	No significant similarity	No significant similarity
provir|Xie_HL_2016_CS_37201.scaffold837_1_124807_1_37	No significant similarity	No significant similarity	hypothetical_protein
provir|Xie_HL_2016_CS_37201.scaffold837_1_124807_1_38	No significant similarity	No significant similarity	No significant similarity
provir|Xie_HL_2016_CS_37201.scaffold837_1_124807_1_39	No significant similarity	No significant similarity	hypothetical_protein_BZ138_06015
provir|Xie_HL_2016_CS_37201.scaffold837_1_124807_1_40	No significant similarity	No significant similarity	No significant similarity
provir|Xie_HL_2016_CS_37201.scaffold837_1_124807_1_41	SesA	N-terminal domain on NACHT_NTPase and P-loop NTPases	hypothetical_protein
provir|Xie_HL_2016_CS_37201.scaffold837_1_124807_1_42	No significant similarity	No significant similarity	No significant similarity
provir|Xie_HL_2016_CS_37201.scaffold837_1_124807_1_43	Transglut_core	Transglutaminase-like superfamily	transglutaminase_domain-containing_protein
provir|Xie_HL_2016_CS_37201.scaffold837_1_124807_1_44	No significant similarity	No significant similarity	hypothetical_protein
provir|Xie_HL_2016_CS_37201.scaffold837_1_124807_1_45	No significant similarity	No significant similarity	hypothetical_protein
provir|Xie_HL_2016_CS_37201.scaffold837_1_124807_1_46	DUF2634	Protein of unknown function (DUF2634)	hypothetical_protein
provir|Xie_HL_2016_CS_37201.scaffold837_1_124807_1_47	Baseplate_J	Baseplate J-like protein	hypothetical_protein
provir|Xie_HL_2016_CS_37201.scaffold837_1_124807_1_48	No significant similarity	No significant similarity	DUF1565_domain-containing_protein
provir|Xie_HL_2016_CS_37201.scaffold837_1_124807_1_49	No significant similarity	No significant similarity	No significant similarity
provir|Xie_HL_2016_CS_37201.scaffold837_1_124807_1_50	No significant similarity	No significant similarity	hypothetical_protein
provir|Xie_HL_2016_CS_37201.scaffold837_1_124807_1_51	No significant similarity	No significant similarity	hypothetical_protein
provir|Xie_HL_2016_CS_37201.scaffold837_1_124807_1_52	No significant similarity	No significant similarity	hypothetical_protein
provir|Xie_HL_2016_CS_37201.scaffold837_1_124807_1_53	No significant similarity	No significant similarity	No significant similarity
provir|Xie_HL_2016_CS_37201.scaffold837_1_124807_1_54	No significant similarity	No significant similarity	No significant similarity
provir|Xie_HL_2016_CS_37201.scaffold837_1_124807_1_55	PTR	Phage tail repeat like	hypothetical_protein_Msm_1688

## Sheet: VC_324
ORF Name	Pfam	Pfam_description	NR_description
GPD|uvig_418233_1	No significant similarity	No significant similarity	No significant similarity
GPD|uvig_418233_2	No significant similarity	No significant similarity	hypothetical_protein
GPD|uvig_418233_3	No significant similarity	No significant similarity	hypothetical_protein
GPD|uvig_418233_4	Peptidase_S78_2	Putative phage serine protease XkdF	hypothetical_protein
GPD|uvig_418233_5	No significant similarity	No significant similarity	hypothetical_protein
GPD|uvig_418233_6	Phage_capsid	Phage capsid family	hypothetical_protein
GPD|uvig_418233_7	No significant similarity	No significant similarity	MULTISPECIES:_hypothetical_protein
GPD|uvig_418233_8	No significant similarity	No significant similarity	hypothetical_protein
GPD|uvig_418233_9	No significant similarity	No significant similarity	MULTISPECIES:_hypothetical_protein
GPD|uvig_418233_10	No significant similarity	No significant similarity	hypothetical_protein
GPD|uvig_418233_11	No significant similarity	No significant similarity	hypothetical_protein
GPD|uvig_418233_12	No significant similarity	No significant similarity	hypothetical_protein
GPD|uvig_418233_13	No significant similarity	No significant similarity	hypothetical_protein
GPD|uvig_418233_14	No significant similarity	No significant similarity	MULTISPECIES:_hypothetical_protein
GPD|uvig_418233_15	Sipho_tail	Phage tail protein	hypothetical_protein
GPD|uvig_418233_16	No significant similarity	No significant similarity	MULTISPECIES:_hypothetical_protein
GPD|uvig_418233_17	No significant similarity	No significant similarity	hypothetical_protein
GPD|uvig_418233_18	No significant similarity	No significant similarity	collagen-like_protein
GPD|uvig_418233_19	No significant similarity	No significant similarity	hypothetical_protein_Msm_1690
GPD|uvig_418233_20	Peptidase_C71	Pseudomurein endo-isopeptidase Pei	MULTISPECIES:_PeiW-related_protein_(phage_psiM100)
GPD|uvig_418233_21	No significant similarity	No significant similarity	hypothetical_protein
GPD|uvig_418233_22	Phage_integrase	Phage integrase family	MULTISPECIES:_site-specific_integrase
GPD|uvig_418233_23	No significant similarity	No significant similarity	hypothetical_protein
GPD|uvig_418233_24	DUF2283	Protein of unknown function (DUF2283)	DUF2283_domain-containing_protein
GPD|uvig_418233_25	No significant similarity	No significant similarity	hypothetical_protein
GPD|uvig_418233_26	No significant similarity	No significant similarity	hypothetical_protein
GPD|uvig_418233_27	No significant similarity	No significant similarity	hypothetical_protein
GPD|uvig_418233_28	No significant similarity	No significant similarity	hypothetical_protein
GPD|uvig_418233_29	Bro-N	BRO family, N-terminal domain	hypothetical_protein
GPD|uvig_418233_30	MazE_antitoxin	Antidote-toxin recognition MazE, bacterial antitoxin	No significant similarity
GPD|uvig_418233_31	No significant similarity	No significant similarity	hypothetical_protein_Msm_1648
GPD|uvig_418233_32	No significant similarity	No significant similarity	MULTISPECIES:_hypothetical_protein
GPD|uvig_418233_33	No significant similarity	No significant similarity	MULTISPECIES:_hypothetical_protein
GPD|uvig_418233_34	No significant similarity	No significant similarity	hypothetical_protein
GPD|uvig_418233_35	No significant similarity	No significant similarity	hypothetical_protein
GPD|uvig_418233_36	ERF	ERF superfamily	hypothetical_protein
GPD|uvig_418233_37	No significant similarity	No significant similarity	hypothetical_protein
GPD|uvig_418233_38	No significant similarity	No significant similarity	hypothetical_protein
GPD|uvig_418233_39	No significant similarity	No significant similarity	No significant similarity
GPD|uvig_418233_40	No significant similarity	No significant similarity	hypothetical_protein_Msm_1662
GPD|uvig_418233_41	No significant similarity	No significant similarity	hypothetical_protein
GPD|uvig_418233_42	No significant similarity	No significant similarity	hypothetical_protein
GPD|uvig_418233_43	No significant similarity	No significant similarity	MULTISPECIES:_hypothetical_protein
GPD|uvig_418233_44	No significant similarity	No significant similarity	No significant similarity
GPD|uvig_418233_45	No significant similarity	No significant similarity	No significant similarity
GPD|uvig_418233_46	No significant similarity	No significant similarity	hypothetical_protein_Msm_1668
GPD|uvig_418233_47	No significant similarity	No significant similarity	hypothetical_protein
GPD|uvig_418233_48	No significant similarity	No significant similarity	hypothetical_protein
GPD|uvig_418233_49	Terminase_6C	Terminase RNaseH-like domain	MULTISPECIES:_large_terminase_subunit
GPD|uvig_418233_50	Phage_portal	Phage portal protein	phage_portal_protein
IMG|UGV-GENOME-0262162_1	No significant similarity	No significant similarity	hypothetical_protein
IMG|UGV-GENOME-0262162_2	No significant similarity	No significant similarity	MULTISPECIES:_hypothetical_protein
IMG|UGV-GENOME-0262162_3	No significant similarity	No significant similarity	hypothetical_protein
IMG|UGV-GENOME-0262162_4	No significant similarity	No significant similarity	hypothetical_protein
IMG|UGV-GENOME-0262162_5	No significant similarity	No significant similarity	No significant similarity
IMG|UGV-GENOME-0262162_6	No significant similarity	No significant similarity	hypothetical_protein_Msm_1662
IMG|UGV-GENOME-0262162_7	No significant similarity	No significant similarity	hypothetical_protein
IMG|UGV-GENOME-0262162_8	No significant similarity	No significant similarity	MarR_family_transcriptional_regulator
IMG|UGV-GENOME-0262162_9	No significant similarity	No significant similarity	No significant similarity
IMG|UGV-GENOME-0262162_10	No significant similarity	No significant similarity	No significant similarity
IMG|UGV-GENOME-0262162_11	ERF	ERF superfamily	hypothetical_protein
IMG|UGV-GENOME-0262162_12	No significant similarity	No significant similarity	hypothetical_protein
IMG|UGV-GENOME-0262162_13	No significant similarity	No significant similarity	hypothetical_protein
IMG|UGV-GENOME-0262162_14	No significant similarity	No significant similarity	MULTISPECIES:_hypothetical_protein
IMG|UGV-GENOME-0262162_15	No significant similarity	No significant similarity	MULTISPECIES:_hypothetical_protein
IMG|UGV-GENOME-0262162_16	No significant similarity	No significant similarity	hypothetical_protein_Msm_1648
IMG|UGV-GENOME-0262162_17	No significant similarity	No significant similarity	No significant similarity
IMG|UGV-GENOME-0262162_18	SHOCT	Short C-terminal domain	hypothetical_protein_METSMIALI_00786,_partial
IMG|UGV-GENOME-0262162_19	No significant similarity	No significant similarity	hypothetical_protein
IMG|UGV-GENOME-0262162_20	No significant similarity	No significant similarity	No significant similarity
IMG|UGV-GENOME-0262162_21	No significant similarity	No significant similarity	hypothetical_protein
IMG|UGV-GENOME-0262162_22	YafQ_toxin	Bacterial toxin of type II toxin-antitoxin system, YafQ	hypothetical_protein_BZ136_09025
IMG|UGV-GENOME-0262162_23	No significant similarity	No significant similarity	No significant similarity
IMG|UGV-GENOME-0262162_24	No significant similarity	No significant similarity	hypothetical_protein_BZ134_00125
IMG|UGV-GENOME-0262162_25	Phage_integrase	Phage integrase family	MULTISPECIES:_site-specific_integrase
IMG|UGV-GENOME-0262162_26	No significant similarity	No significant similarity	hypothetical_protein
IMG|UGV-GENOME-0262162_27	No significant similarity	No significant similarity	No significant similarity
IMG|UGV-GENOME-0262162_28	Peptidase_C71	Pseudomurein endo-isopeptidase Pei	hypothetical_protein
IMG|UGV-GENOME-0262162_29	No significant similarity	No significant similarity	hypothetical_protein_Msm_1690
IMG|UGV-GENOME-0262162_30	No significant similarity	No significant similarity	putative_collagen-like_protein_B
IMG|UGV-GENOME-0262162_31	No significant similarity	No significant similarity	hypothetical_protein
IMG|UGV-GENOME-0262162_32	No significant similarity	No significant similarity	hypothetical_protein
IMG|UGV-GENOME-0262162_33	Sipho_tail	Phage tail protein	hypothetical_protein
IMG|UGV-GENOME-0262162_34	No significant similarity	No significant similarity	MULTISPECIES:_hypothetical_protein
IMG|UGV-GENOME-0262162_35	No significant similarity	No significant similarity	hypothetical_protein
IMG|UGV-GENOME-0262162_36	No significant similarity	No significant similarity	hypothetical_protein
IMG|UGV-GENOME-0262162_37	No significant similarity	No significant similarity	hypothetical_protein
IMG|UGV-GENOME-0262162_38	No significant similarity	No significant similarity	hypothetical_protein
IMG|UGV-GENOME-0262162_39	No significant similarity	No significant similarity	MULTISPECIES:_hypothetical_protein
IMG|UGV-GENOME-0262162_40	No significant similarity	No significant similarity	hypothetical_protein
IMG|UGV-GENOME-0262162_41	No significant similarity	No significant similarity	MULTISPECIES:_hypothetical_protein
IMG|UGV-GENOME-0262162_42	Phage_capsid	Phage capsid family	hypothetical_protein
IMG|UGV-GENOME-0262162_43	No significant similarity	No significant similarity	MULTISPECIES:_hypothetical_protein
IMG|UGV-GENOME-0262162_44	Peptidase_S78_2	Putative phage serine protease XkdF	hypothetical_protein
IMG|UGV-GENOME-0262162_45	No significant similarity	No significant similarity	hypothetical_protein
IMG|UGV-GENOME-0262162_46	No significant similarity	No significant similarity	hypothetical_protein
IMG|UGV-GENOME-0262162_47	Phage_portal	Phage portal protein	phage_portal_protein
IMG|UGV-GENOME-0262162_48	Terminase_6C	Terminase RNaseH-like domain	MULTISPECIES:_large_terminase_subunit
IMG|UGV-GENOME-0262162_49	No significant similarity	No significant similarity	hypothetical_protein
IMG|UGV-GENOME-0262162_50	No significant similarity	No significant similarity	hypothetical_protein
IMG|UGV-GENOME-0262162_51	No significant similarity	No significant similarity	hypothetical_protein_Msm_1668
IMG|UGV-GENOME-4415077_1	Terminase_6C	Terminase RNaseH-like domain	MULTISPECIES:_large_terminase_subunit
IMG|UGV-GENOME-4415077_2	Phage_portal	Phage portal protein	phage_portal_protein
IMG|UGV-GENOME-4415077_3	No significant similarity	No significant similarity	hypothetical_protein
IMG|UGV-GENOME-4415077_4	No significant similarity	No significant similarity	hypothetical_protein
IMG|UGV-GENOME-4415077_5	Peptidase_S78_2	Putative phage serine protease XkdF	hypothetical_protein
IMG|UGV-GENOME-4415077_6	No significant similarity	No significant similarity	MULTISPECIES:_hypothetical_protein
IMG|UGV-GENOME-4415077_7	Phage_capsid	Phage capsid family	hypothetical_protein
IMG|UGV-GENOME-4415077_8	No significant similarity	No significant similarity	MULTISPECIES:_hypothetical_protein
IMG|UGV-GENOME-4415077_9	No significant similarity	No significant similarity	MULTISPECIES:_hypothetical_protein
IMG|UGV-GENOME-4415077_10	No significant similarity	No significant similarity	MULTISPECIES:_hypothetical_protein
IMG|UGV-GENOME-4415077_11	No significant similarity	No significant similarity	hypothetical_protein
IMG|UGV-GENOME-4415077_12	No significant similarity	No significant similarity	hypothetical_protein
IMG|UGV-GENOME-4415077_13	No significant similarity	No significant similarity	hypothetical_protein
IMG|UGV-GENOME-4415077_14	No significant similarity	No significant similarity	hypothetical_protein
IMG|UGV-GENOME-4415077_15	No significant similarity	No significant similarity	MULTISPECIES:_hypothetical_protein
IMG|UGV-GENOME-4415077_16	Sipho_tail	Phage tail protein	hypothetical_protein
IMG|UGV-GENOME-4415077_17	No significant similarity	No significant similarity	MULTISPECIES:_hypothetical_protein
IMG|UGV-GENOME-4415077_18	No significant similarity	No significant similarity	hypothetical_protein
IMG|UGV-GENOME-4415077_19	Collagen	Collagen triple helix repeat (20 copies)	collagen-like_protein
IMG|UGV-GENOME-4415077_20	No significant similarity	No significant similarity	hypothetical_protein_Msm_1690
IMG|UGV-GENOME-4415077_21	Peptidase_C71	Pseudomurein endo-isopeptidase Pei	MULTISPECIES:_PeiW-related_protein_(phage_psiM100)
IMG|UGV-GENOME-4415077_22	No significant similarity	No significant similarity	No significant similarity
IMG|UGV-GENOME-4415077_23	No significant similarity	No significant similarity	hypothetical_protein
IMG|UGV-GENOME-4415077_24	Phage_integrase	Phage integrase family	MULTISPECIES:_site-specific_integrase
IMG|UGV-GENOME-4415077_25	No significant similarity	No significant similarity	hypothetical_protein
IMG|UGV-GENOME-4415077_26	DUF2283	No significant similarity	DUF2283_domain-containing_protein
IMG|UGV-GENOME-4415077_27	No significant similarity	No significant similarity	hypothetical_protein
IMG|UGV-GENOME-4415077_28	No significant similarity	No significant similarity	No significant similarity
IMG|UGV-GENOME-4415077_29	No significant similarity	No significant similarity	hypothetical_protein
IMG|UGV-GENOME-4415077_30	Bro-N	BRO family, N-terminal domain	hypothetical_protein
IMG|UGV-GENOME-4415077_31	No significant similarity	No significant similarity	hypothetical_protein_Msm_1647
IMG|UGV-GENOME-4415077_32	No significant similarity	No significant similarity	hypothetical_protein_Msm_1648
IMG|UGV-GENOME-4415077_33	No significant similarity	No significant similarity	MULTISPECIES:_hypothetical_protein
IMG|UGV-GENOME-4415077_34	No significant similarity	No significant similarity	MULTISPECIES:_hypothetical_protein
IMG|UGV-GENOME-4415077_35	No significant similarity	No significant similarity	hypothetical_protein
IMG|UGV-GENOME-4415077_36	No significant similarity	No significant similarity	hypothetical_protein
IMG|UGV-GENOME-4415077_37	ERF	ERF superfamily	hypothetical_protein
IMG|UGV-GENOME-4415077_38	No significant similarity	No significant similarity	No significant similarity
IMG|UGV-GENOME-4415077_39	No significant similarity	No significant similarity	No significant similarity
IMG|UGV-GENOME-4415077_40	No significant similarity	No significant similarity	hypothetical_protein
IMG|UGV-GENOME-4415077_41	No significant similarity	No significant similarity	No significant similarity
IMG|UGV-GENOME-4415077_42	No significant similarity	No significant similarity	MULTISPECIES:_hypothetical_protein
IMG|UGV-GENOME-4415077_43	No significant similarity	No significant similarity	MULTISPECIES:_ASCH_domain-containing_protein
IMG|UGV-GENOME-4415077_44	No significant similarity	No significant similarity	No significant similarity
IMG|UGV-GENOME-4415077_45	No significant similarity	No significant similarity	No significant similarity
IMG|UGV-GENOME-4415077_46	No significant similarity	No significant similarity	hypothetical_protein
IMG|UGV-GENOME-4415077_47	No significant similarity	No significant similarity	hypothetical_protein
IMG|UGV-GENOME-4415077_48	No significant similarity	No significant similarity	MULTISPECIES:_hypothetical_protein
IMG|UGV-GENOME-4415077_49	No significant similarity	No significant similarity	hypothetical_protein
IMG|UGV-GENOME-4415077_50	No significant similarity	No significant similarity	No significant similarity
IMG|UGV-GENOME-4415077_51	No significant similarity	No significant similarity	hypothetical_protein_Msm_1668
IMG|UGV-GENOME-4415077_52	No significant similarity	No significant similarity	MULTISPECIES:_hypothetical_protein
IMG|UGV-GENOME-4415077_53	No significant similarity	No significant similarity	hypothetical_protein
IMG|UGV-GENOME-0258495_1	No significant similarity	No significant similarity	MULTISPECIES:_hypothetical_protein
IMG|UGV-GENOME-0258495_2	Sipho_tail	Phage tail protein	hypothetical_protein
IMG|UGV-GENOME-0258495_3	No significant similarity	No significant similarity	MULTISPECIES:_hypothetical_protein
IMG|UGV-GENOME-0258495_4	No significant similarity	No significant similarity	hypothetical_protein
IMG|UGV-GENOME-0258495_5	No significant similarity	No significant similarity	hypothetical_protein
IMG|UGV-GENOME-0258495_6	No significant similarity	No significant similarity	hypothetical_protein
IMG|UGV-GENOME-0258495_7	No significant similarity	No significant similarity	hypothetical_protein
IMG|UGV-GENOME-0258495_8	No significant similarity	No significant similarity	hypothetical_protein
IMG|UGV-GENOME-0258495_9	No significant similarity	No significant similarity	hypothetical_protein
IMG|UGV-GENOME-0258495_10	No significant similarity	No significant similarity	MULTISPECIES:_hypothetical_protein
IMG|UGV-GENOME-0258495_11	Phage_capsid	Phage capsid family	hypothetical_protein
IMG|UGV-GENOME-0258495_12	No significant similarity	No significant similarity	MULTISPECIES:_hypothetical_protein
IMG|UGV-GENOME-0258495_13	Peptidase_S78_2	Putative phage serine protease XkdF	hypothetical_protein
IMG|UGV-GENOME-0258495_14	No significant similarity	No significant similarity	hypothetical_protein_METSMIALI_00363
IMG|UGV-GENOME-0258495_15	No significant similarity	No significant similarity	hypothetical_protein
IMG|UGV-GENOME-0258495_16	Phage_portal	Phage portal protein	phage_portal_protein
IMG|UGV-GENOME-0258495_17	Terminase_6C	Terminase RNaseH-like domain	MULTISPECIES:_large_terminase_subunit
IMG|UGV-GENOME-0258495_18	No significant similarity	No significant similarity	hypothetical_protein
IMG|UGV-GENOME-0258495_19	No significant similarity	No significant similarity	MULTISPECIES:_hypothetical_protein
IMG|UGV-GENOME-0258495_20	No significant similarity	No significant similarity	hypothetical_protein_Msm_1668
IMG|UGV-GENOME-0258495_21	No significant similarity	No significant similarity	No significant similarity
IMG|UGV-GENOME-0258495_22	No significant similarity	No significant similarity	hypothetical_protein
IMG|UGV-GENOME-0258495_23	No significant similarity	No significant similarity	MULTISPECIES:_hypothetical_protein
IMG|UGV-GENOME-0258495_24	No significant similarity	No significant similarity	hypothetical_protein
IMG|UGV-GENOME-0258495_25	No significant similarity	No significant similarity	hypothetical_protein
IMG|UGV-GENOME-0258495_26	No significant similarity	No significant similarity	hypothetical_protein_Msm_1662
IMG|UGV-GENOME-0258495_27	No significant similarity	No significant similarity	hypothetical_protein
IMG|UGV-GENOME-0258495_28	No significant similarity	No significant similarity	MarR_family_transcriptional_regulator
IMG|UGV-GENOME-0258495_29	No significant similarity	No significant similarity	hypothetical_protein
IMG|UGV-GENOME-0258495_30	No significant similarity	No significant similarity	MULTISPECIES:_hypothetical_protein
IMG|UGV-GENOME-0258495_31	ERF	ERF superfamily	hypothetical_protein
IMG|UGV-GENOME-0258495_32	No significant similarity	No significant similarity	hypothetical_protein
IMG|UGV-GENOME-0258495_33	No significant similarity	No significant similarity	hypothetical_protein
IMG|UGV-GENOME-0258495_34	No significant similarity	No significant similarity	MULTISPECIES:_hypothetical_protein
IMG|UGV-GENOME-0258495_35	No significant similarity	No significant similarity	MULTISPECIES:_hypothetical_protein
IMG|UGV-GENOME-0258495_36	No significant similarity	No significant similarity	hypothetical_protein_Msm_1648
IMG|UGV-GENOME-0258495_37	No significant similarity	No significant similarity	No significant similarity
IMG|UGV-GENOME-0258495_38	No significant similarity	No significant similarity	No significant similarity
IMG|UGV-GENOME-0258495_39	No significant similarity	No significant similarity	No significant similarity
IMG|UGV-GENOME-0258495_40	Virulence_RhuM	Virulence protein RhuM family	virulence_RhuM_family_protein
IMG|UGV-GENOME-0258495_41	No significant similarity	No significant similarity	hypothetical_protein
IMG|UGV-GENOME-0258495_42	No significant similarity	No significant similarity	MULTISPECIES:_hypothetical_protein
IMG|UGV-GENOME-0258495_43	No significant similarity	No significant similarity	MULTISPECIES:_hypothetical_protein
IMG|UGV-GENOME-0258495_44	No significant similarity	No significant similarity	MULTISPECIES:_hypothetical_protein
IMG|UGV-GENOME-0258495_45	Phage_integrase	Phage integrase family	MULTISPECIES:_site-specific_integrase
IMG|UGV-GENOME-0258495_46	No significant similarity	No significant similarity	hypothetical_protein
IMG|UGV-GENOME-0258495_47	Peptidase_C71	Pseudomurein endo-isopeptidase Pei	MULTISPECIES:_PeiW-related_protein_(phage_psiM100)
IMG|UGV-GENOME-0258495_48	No significant similarity	No significant similarity	hypothetical_protein_Msm_1690
IMG|UGV-GENOME-0258495_49	Collagen	Collagen triple helix repeat (20 copies)	collagen-like_protein
IMG|UGV-GENOME-0258495_50	No significant similarity	No significant similarity	hypothetical_protein
IMG|UGV-GENOME-0257711_1	No significant similarity	No significant similarity	hypothetical_protein
IMG|UGV-GENOME-0257711_2	No significant similarity	No significant similarity	hypothetical_protein
IMG|UGV-GENOME-0257711_3	No significant similarity	No significant similarity	MULTISPECIES:_hypothetical_protein
IMG|UGV-GENOME-0257711_4	MazE_antitoxin	Antidote-toxin recognition MazE, bacterial antitoxin	No significant similarity
IMG|UGV-GENOME-0257711_5	MazE_antitoxin	Antidote-toxin recognition MazE, bacterial antitoxin	No significant similarity
IMG|UGV-GENOME-0257711_6	No significant similarity	No significant similarity	No significant similarity
IMG|UGV-GENOME-0257711_7	No significant similarity	No significant similarity	No significant similarity
IMG|UGV-GENOME-0257711_8	No significant similarity	No significant similarity	hypothetical_protein
IMG|UGV-GENOME-0257711_9	DUF2283	Protein of unknown function (DUF2283)	DUF2283_domain-containing_protein
IMG|UGV-GENOME-0257711_10	No significant similarity	No significant similarity	hypothetical_protein
IMG|UGV-GENOME-0257711_11	Phage_integrase	Phage integrase family	MULTISPECIES:_site-specific_integrase
IMG|UGV-GENOME-0257711_12	No significant similarity	No significant similarity	hypothetical_protein
IMG|UGV-GENOME-0257711_13	Peptidase_C71	Pseudomurein endo-isopeptidase Pei	MULTISPECIES:_PeiW-related_protein_(phage_psiM100)
IMG|UGV-GENOME-0257711_14	No significant similarity	No significant similarity	hypothetical_protein_Msm_1690
IMG|UGV-GENOME-0257711_15	No significant similarity	No significant similarity	collagen-like_protein
IMG|UGV-GENOME-0257711_16	No significant similarity	No significant similarity	hypothetical_protein
IMG|UGV-GENOME-0257711_17	No significant similarity	No significant similarity	MULTISPECIES:_hypothetical_protein
IMG|UGV-GENOME-0257711_18	Sipho_tail	Phage tail protein	hypothetical_protein
IMG|UGV-GENOME-0257711_19	No significant similarity	No significant similarity	MULTISPECIES:_hypothetical_protein
IMG|UGV-GENOME-0257711_20	No significant similarity	No significant similarity	hypothetical_protein
IMG|UGV-GENOME-0257711_21	No significant similarity	No significant similarity	hypothetical_protein
IMG|UGV-GENOME-0257711_22	No significant similarity	No significant similarity	hypothetical_protein
IMG|UGV-GENOME-0257711_23	No significant similarity	No significant similarity	MULTISPECIES:_hypothetical_protein
IMG|UGV-GENOME-0257711_24	No significant similarity	No significant similarity	MULTISPECIES:_hypothetical_protein
IMG|UGV-GENOME-0257711_25	No significant similarity	No significant similarity	hypothetical_protein
IMG|UGV-GENOME-0257711_26	No significant similarity	No significant similarity	MULTISPECIES:_hypothetical_protein
IMG|UGV-GENOME-0257711_27	Phage_capsid	Phage capsid family	hypothetical_protein
IMG|UGV-GENOME-0257711_28	No significant similarity	No significant similarity	hypothetical_protein
IMG|UGV-GENOME-0257711_29	Peptidase_S78_2	Putative phage serine protease XkdF	hypothetical_protein
IMG|UGV-GENOME-0257711_30	No significant similarity	No significant similarity	hypothetical_protein
IMG|UGV-GENOME-0257711_31	No significant similarity	No significant similarity	hypothetical_protein
IMG|UGV-GENOME-0257711_32	No significant similarity	No significant similarity	hypothetical_protein
IMG|UGV-GENOME-0257711_33	Phage_portal	Phage portal protein	phage_portal_protein
IMG|UGV-GENOME-0257711_34	Terminase_6C	Terminase-like family	MULTISPECIES:_large_terminase_subunit
IMG|UGV-GENOME-0257711_35	No significant similarity	No significant similarity	hypothetical_protein
IMG|UGV-GENOME-0257711_36	No significant similarity	No significant similarity	hypothetical_protein
IMG|UGV-GENOME-0257711_37	No significant similarity	No significant similarity	hypothetical_protein_Msm_1668
IMG|UGV-GENOME-0257711_38	No significant similarity	No significant similarity	No significant similarity
IMG|UGV-GENOME-0257711_39	No significant similarity	No significant similarity	hypothetical_protein
IMG|UGV-GENOME-0257711_40	No significant similarity	No significant similarity	MULTISPECIES:_hypothetical_protein
IMG|UGV-GENOME-0257711_41	No significant similarity	No significant similarity	hypothetical_protein
IMG|UGV-GENOME-0257711_42	No significant similarity	No significant similarity	hypothetical_protein
IMG|UGV-GENOME-0257711_43	No significant similarity	No significant similarity	No significant similarity
IMG|UGV-GENOME-0257711_44	No significant similarity	No significant similarity	hypothetical_protein_Msm_1662
IMG|UGV-GENOME-0257711_45	No significant similarity	No significant similarity	hypothetical_protein
IMG|UGV-GENOME-0257711_46	No significant similarity	No significant similarity	MarR_family_transcriptional_regulator
IMG|UGV-GENOME-0257711_47	No significant similarity	No significant similarity	No significant similarity
IMG|UGV-GENOME-0257711_48	No significant similarity	No significant similarity	No significant similarity
IMG|UGV-GENOME-0257711_49	ERF	ERF superfamily	hypothetical_protein
IMG|UGV-GENOME-0257348_1	No significant similarity	No significant similarity	hypothetical_protein_Msm_1668
IMG|UGV-GENOME-0257348_2	No significant similarity	No significant similarity	MULTISPECIES:_hypothetical_protein
IMG|UGV-GENOME-0257348_3	No significant similarity	No significant similarity	hypothetical_protein
IMG|UGV-GENOME-0257348_4	Terminase_6C	Terminase RNaseH-like domain	hypothetical_protein
IMG|UGV-GENOME-0257348_5	Phage_portal	Phage portal protein	phage_portal_protein
IMG|UGV-GENOME-0257348_6	No significant similarity	No significant similarity	hypothetical_protein
IMG|UGV-GENOME-0257348_7	No significant similarity	No significant similarity	hypothetical_protein
IMG|UGV-GENOME-0257348_8	Peptidase_S78_2	Putative phage serine protease XkdF	hypothetical_protein
IMG|UGV-GENOME-0257348_9	No significant similarity	No significant similarity	MULTISPECIES:_hypothetical_protein
IMG|UGV-GENOME-0257348_10	Phage_capsid	Phage capsid family	MULTISPECIES:_phage_capsid_protein
IMG|UGV-GENOME-0257348_11	No significant similarity	No significant similarity	MULTISPECIES:_hypothetical_protein
IMG|UGV-GENOME-0257348_12	No significant similarity	No significant similarity	hypothetical_protein
IMG|UGV-GENOME-0257348_13	No significant similarity	No significant similarity	MULTISPECIES:_hypothetical_protein
IMG|UGV-GENOME-0257348_14	No significant similarity	No significant similarity	MULTISPECIES:_hypothetical_protein
IMG|UGV-GENOME-0257348_15	No significant similarity	No significant similarity	hypothetical_protein
IMG|UGV-GENOME-0257348_16	No significant similarity	No significant similarity	hypothetical_protein
IMG|UGV-GENOME-0257348_17	No significant similarity	No significant similarity	hypothetical_protein
IMG|UGV-GENOME-0257348_18	No significant similarity	No significant similarity	MULTISPECIES:_hypothetical_protein
IMG|UGV-GENOME-0257348_19	Sipho_tail	Phage tail protein	hypothetical_protein
IMG|UGV-GENOME-0257348_20	No significant similarity	No significant similarity	MULTISPECIES:_hypothetical_protein
IMG|UGV-GENOME-0257348_21	PTR	Phage tail repeat like	hypothetical_protein_Msm_1688
IMG|UGV-GENOME-0257348_22	Collagen	Collagen triple helix repeat (20 copies)	putative_collagen-like_protein_B
IMG|UGV-GENOME-0257348_23	Peptidase_C71	Pseudomurein endo-isopeptidase Pei	hypothetical_protein
IMG|UGV-GENOME-0257348_24	No significant similarity	No significant similarity	No significant similarity
IMG|UGV-GENOME-0257348_25	No significant similarity	No significant similarity	hypothetical_protein
IMG|UGV-GENOME-0257348_26	No significant similarity	No significant similarity	No significant similarity
IMG|UGV-GENOME-0257348_27	Phage_integrase	Phage integrase family	site-specific_integrase
IMG|UGV-GENOME-0257348_28	No significant similarity	No significant similarity	hypothetical_protein
IMG|UGV-GENOME-0257348_29	DUF2283	Protein of unknown function (DUF2283)	DUF2283_domain-containing_protein
IMG|UGV-GENOME-0257348_30	No significant similarity	No significant similarity	hypothetical_protein
IMG|UGV-GENOME-0257348_31	No significant similarity	No significant similarity	hypothetical_protein
IMG|UGV-GENOME-0257348_32	No significant similarity	No significant similarity	hypothetical_protein
IMG|UGV-GENOME-0257348_33	No significant similarity	No significant similarity	hypothetical_protein
IMG|UGV-GENOME-0257348_34	AAA_16	AAA ATPase domain	MULTISPECIES:_ATP-binding_protein
IMG|UGV-GENOME-0257348_35	No significant similarity	No significant similarity	hypothetical_protein_Msm_1648
IMG|UGV-GENOME-0257348_36	No significant similarity	No significant similarity	MULTISPECIES:_hypothetical_protein
IMG|UGV-GENOME-0257348_37	No significant similarity	No significant similarity	hypothetical_protein
IMG|UGV-GENOME-0257348_38	No significant similarity	No significant similarity	hypothetical_protein
IMG|UGV-GENOME-0257348_39	No significant similarity	No significant similarity	No significant similarity
IMG|UGV-GENOME-0257348_40	ERF	ERF superfamily	hypothetical_protein
IMG|UGV-GENOME-0257348_41	No significant similarity	No significant similarity	hypothetical_protein_SAMN05216439_1147
IMG|UGV-GENOME-0257348_42	No significant similarity	No significant similarity	MarR_family_transcriptional_regulator
IMG|UGV-GENOME-0257348_43	No significant similarity	No significant similarity	hypothetical_protein
IMG|UGV-GENOME-0257348_44	No significant similarity	No significant similarity	No significant similarity
IMG|UGV-GENOME-0257348_45	No significant similarity	No significant similarity	hypothetical_protein_Msm_1662
IMG|UGV-GENOME-0257348_46	No significant similarity	No significant similarity	No significant similarity
IMG|UGV-GENOME-0257348_47	No significant similarity	No significant similarity	hypothetical_protein
IMG|UGV-GENOME-0257348_48	No significant similarity	No significant similarity	MULTISPECIES:_hypothetical_protein
IMG|UGV-GENOME-0257348_49	No significant similarity	No significant similarity	MULTISPECIES:_hypothetical_protein
IMG|UGV-GENOME-0257348_50	No significant similarity	No significant similarity	MULTISPECIES:_hypothetical_protein
IMG|UGV-GENOME-0257216_1	Phage_integrase	Phage integrase family	MULTISPECIES:_site-specific_integrase
IMG|UGV-GENOME-0257216_2	No significant similarity	No significant similarity	hypothetical_protein
IMG|UGV-GENOME-0257216_3	DUF2283	Protein of unknown function (DUF2283)	DUF2283_domain-containing_protein
IMG|UGV-GENOME-0257216_4	No significant similarity	No significant similarity	MULTISPECIES:_hypothetical_protein
IMG|UGV-GENOME-0257216_5	No significant similarity	No significant similarity	hypothetical_protein
IMG|UGV-GENOME-0257216_6	Bro-N	BRO family, N-terminal domain	hypothetical_protein
IMG|UGV-GENOME-0257216_7	DDE_Tnp_IS240	DDE domain	DDE-type_integrase/transposase/recombinase
IMG|UGV-GENOME-0257216_8	No significant similarity	No significant similarity	No significant similarity
IMG|UGV-GENOME-0257216_9	No significant similarity	No significant similarity	hypothetical_protein_Msm_1648
IMG|UGV-GENOME-0257216_10	No significant similarity	No significant similarity	MULTISPECIES:_hypothetical_protein
IMG|UGV-GENOME-0257216_11	No significant similarity	No significant similarity	MULTISPECIES:_hypothetical_protein
IMG|UGV-GENOME-0257216_12	ERF	ERF superfamily	hypothetical_protein
IMG|UGV-GENOME-0257216_13	No significant similarity	No significant similarity	hypothetical_protein
IMG|UGV-GENOME-0257216_14	No significant similarity	No significant similarity	hypothetical_protein
IMG|UGV-GENOME-0257216_15	No significant similarity	No significant similarity	MarR_family_transcriptional_regulator
IMG|UGV-GENOME-0257216_16	No significant similarity	No significant similarity	No significant similarity
IMG|UGV-GENOME-0257216_17	No significant similarity	No significant similarity	MULTISPECIES:_hypothetical_protein
IMG|UGV-GENOME-0257216_18	No significant similarity	No significant similarity	hypothetical_protein
IMG|UGV-GENOME-0257216_19	No significant similarity	No significant similarity	MULTISPECIES:_hypothetical_protein
IMG|UGV-GENOME-0257216_20	No significant similarity	No significant similarity	MULTISPECIES:_hypothetical_protein
IMG|UGV-GENOME-0257216_21	No significant similarity	No significant similarity	No significant similarity
IMG|UGV-GENOME-0257216_22	No significant similarity	No significant similarity	hypothetical_protein_Msm_1668
IMG|UGV-GENOME-0257216_23	No significant similarity	No significant similarity	MULTISPECIES:_hypothetical_protein
IMG|UGV-GENOME-0257216_24	No significant similarity	No significant similarity	hypothetical_protein
IMG|UGV-GENOME-0257216_25	Terminase_6C	Terminase RNaseH-like domain	MULTISPECIES:_large_terminase_subunit
IMG|UGV-GENOME-0257216_26	Phage_portal	Phage portal protein	phage_portal_protein
IMG|UGV-GENOME-0257216_27	No significant similarity	No significant similarity	hypothetical_protein
IMG|UGV-GENOME-0257216_28	No significant similarity	No significant similarity	hypothetical_protein
IMG|UGV-GENOME-0257216_29	Peptidase_S78_2	Putative phage serine protease XkdF	hypothetical_protein
IMG|UGV-GENOME-0257216_30	No significant similarity	No significant similarity	MULTISPECIES:_hypothetical_protein
IMG|UGV-GENOME-0257216_31	Phage_capsid	Phage capsid family	MULTISPECIES:_phage_capsid_protein
IMG|UGV-GENOME-0257216_32	No significant similarity	No significant similarity	MULTISPECIES:_hypothetical_protein
IMG|UGV-GENOME-0257216_33	No significant similarity	No significant similarity	hypothetical_protein
IMG|UGV-GENOME-0257216_34	No significant similarity	No significant similarity	hypothetical_protein
IMG|UGV-GENOME-0257216_35	No significant similarity	No significant similarity	hypothetical_protein
IMG|UGV-GENOME-0257216_36	No significant similarity	No significant similarity	hypothetical_protein
IMG|UGV-GENOME-0257216_37	No significant similarity	No significant similarity	hypothetical_protein
IMG|UGV-GENOME-0257216_38	No significant similarity	No significant similarity	hypothetical_protein
IMG|UGV-GENOME-0257216_39	No significant similarity	No significant similarity	MULTISPECIES:_hypothetical_protein
IMG|UGV-GENOME-0257216_40	Sipho_tail	Phage tail protein	hypothetical_protein_Msm_1686
IMG|UGV-GENOME-0257216_41	No significant similarity	No significant similarity	hypothetical_protein
IMG|UGV-GENOME-0257216_42	No significant similarity	No significant similarity	hypothetical_protein
IMG|UGV-GENOME-0257216_43	No significant similarity	No significant similarity	collagen-like_protein
IMG|UGV-GENOME-0257216_44	No significant similarity	No significant similarity	hypothetical_protein_Msm_1690
IMG|UGV-GENOME-0257216_45	Peptidase_C71	Pseudomurein endo-isopeptidase Pei	hypothetical_protein
IMG|UGV-GENOME-0257216_46	No significant similarity	No significant similarity	No significant similarity
IMG|UGV-GENOME-0257216_47	No significant similarity	No significant similarity	hypothetical_protein
GPD|uvig_59249_1	No significant similarity	No significant similarity	No significant similarity
GPD|uvig_59249_2	No significant similarity	No significant similarity	hypothetical_protein_Msm_1648
GPD|uvig_59249_3	No significant similarity	No significant similarity	MULTISPECIES:_hypothetical_protein
GPD|uvig_59249_4	No significant similarity	No significant similarity	MULTISPECIES:_hypothetical_protein
GPD|uvig_59249_5	ERF	ERF superfamily	hypothetical_protein
GPD|uvig_59249_6	No significant similarity	No significant similarity	hypothetical_protein
GPD|uvig_59249_7	No significant similarity	No significant similarity	hypothetical_protein
GPD|uvig_59249_8	No significant similarity	No significant similarity	MarR_family_transcriptional_regulator
GPD|uvig_59249_9	No significant similarity	No significant similarity	No significant similarity
GPD|uvig_59249_10	No significant similarity	No significant similarity	MULTISPECIES:_hypothetical_protein
GPD|uvig_59249_11	No significant similarity	No significant similarity	hypothetical_protein
GPD|uvig_59249_12	No significant similarity	No significant similarity	MULTISPECIES:_hypothetical_protein
GPD|uvig_59249_13	No significant similarity	No significant similarity	MULTISPECIES:_hypothetical_protein
GPD|uvig_59249_14	No significant similarity	No significant similarity	No significant similarity
GPD|uvig_59249_15	No significant similarity	No significant similarity	hypothetical_protein_Msm_1668
GPD|uvig_59249_16	No significant similarity	No significant similarity	MULTISPECIES:_hypothetical_protein
GPD|uvig_59249_17	No significant similarity	No significant similarity	hypothetical_protein
GPD|uvig_59249_18	Terminase_6C	Terminase RNaseH-like domain	MULTISPECIES:_large_terminase_subunit
GPD|uvig_59249_19	Phage_portal	Phage portal protein	phage_portal_protein
GPD|uvig_59249_20	No significant similarity	No significant similarity	hypothetical_protein
GPD|uvig_59249_21	No significant similarity	No significant similarity	hypothetical_protein
GPD|uvig_59249_22	Peptidase_S78_2	Putative phage serine protease XkdF	hypothetical_protein
GPD|uvig_59249_23	No significant similarity	No significant similarity	MULTISPECIES:_hypothetical_protein
GPD|uvig_59249_24	Phage_capsid	Phage capsid family	MULTISPECIES:_phage_capsid_protein
GPD|uvig_59249_25	No significant similarity	No significant similarity	MULTISPECIES:_hypothetical_protein
GPD|uvig_59249_26	No significant similarity	No significant similarity	hypothetical_protein
GPD|uvig_59249_27	No significant similarity	No significant similarity	hypothetical_protein
GPD|uvig_59249_28	No significant similarity	No significant similarity	hypothetical_protein
GPD|uvig_59249_29	No significant similarity	No significant similarity	hypothetical_protein
GPD|uvig_59249_30	No significant similarity	No significant similarity	hypothetical_protein
GPD|uvig_59249_31	No significant similarity	No significant similarity	hypothetical_protein
GPD|uvig_59249_32	No significant similarity	No significant similarity	MULTISPECIES:_hypothetical_protein
GPD|uvig_59249_33	Sipho_tail	Phage tail protein	hypothetical_protein_Msm_1686
GPD|uvig_59249_34	No significant similarity	No significant similarity	hypothetical_protein
GPD|uvig_59249_35	No significant similarity	No significant similarity	hypothetical_protein
GPD|uvig_59249_36	No significant similarity	No significant similarity	collagen-like_protein
GPD|uvig_59249_37	No significant similarity	No significant similarity	hypothetical_protein_Msm_1690
GPD|uvig_59249_38	Peptidase_C71	Pseudomurein endo-isopeptidase Pei	hypothetical_protein
GPD|uvig_59249_39	No significant similarity	No significant similarity	No significant similarity
GPD|uvig_59249_40	No significant similarity	No significant similarity	hypothetical_protein
GPD|uvig_59249_41	Phage_integrase	Phage integrase family	MULTISPECIES:_site-specific_integrase
GPD|uvig_59249_42	No significant similarity	No significant similarity	hypothetical_protein
GPD|uvig_59249_43	DUF2283	Protein of unknown function (DUF2283)	DUF2283_domain-containing_protein
GPD|uvig_59249_44	No significant similarity	No significant similarity	MULTISPECIES:_hypothetical_protein
GPD|uvig_59249_45	No significant similarity	No significant similarity	hypothetical_protein
GPD|uvig_59249_46	Bro-N	BRO family, N-terminal domain	hypothetical_protein
GPD|uvig_59249_47	DDE_Tnp_IS240	DDE domain	DDE-type_integrase/transposase/recombinase
IMG|UGV-GENOME-4414252_1	No significant similarity	No significant similarity	MULTISPECIES:_hypothetical_protein
IMG|UGV-GENOME-4414252_2	No significant similarity	No significant similarity	hypothetical_protein
IMG|UGV-GENOME-4414252_3	No significant similarity	No significant similarity	hypothetical_protein
IMG|UGV-GENOME-4414252_4	No significant similarity	No significant similarity	hypothetical_protein
IMG|UGV-GENOME-4414252_5	No significant similarity	No significant similarity	hypothetical_protein
IMG|UGV-GENOME-4414252_6	No significant similarity	No significant similarity	hypothetical_protein
IMG|UGV-GENOME-4414252_7	No significant similarity	No significant similarity	hypothetical_protein
IMG|UGV-GENOME-4414252_8	No significant similarity	No significant similarity	MULTISPECIES:_hypothetical_protein
IMG|UGV-GENOME-4414252_9	Phage_capsid	Phage capsid family	MULTISPECIES:_phage_capsid_protein
IMG|UGV-GENOME-4414252_10	No significant similarity	No significant similarity	MULTISPECIES:_hypothetical_protein
IMG|UGV-GENOME-4414252_11	Peptidase_S78_2	Putative phage serine protease XkdF	hypothetical_protein
IMG|UGV-GENOME-4414252_12	No significant similarity	No significant similarity	hypothetical_protein
IMG|UGV-GENOME-4414252_13	No significant similarity	No significant similarity	hypothetical_protein
IMG|UGV-GENOME-4414252_14	Phage_portal	Phage portal protein	phage_portal_protein
IMG|UGV-GENOME-4414252_15	Terminase_6C	Terminase RNaseH-like domain	MULTISPECIES:_large_terminase_subunit
IMG|UGV-GENOME-4414252_16	No significant similarity	No significant similarity	hypothetical_protein
IMG|UGV-GENOME-4414252_17	No significant similarity	No significant similarity	MULTISPECIES:_hypothetical_protein
IMG|UGV-GENOME-4414252_18	No significant similarity	No significant similarity	hypothetical_protein_Msm_1668
IMG|UGV-GENOME-4414252_19	No significant similarity	No significant similarity	No significant similarity
IMG|UGV-GENOME-4414252_20	No significant similarity	No significant similarity	MULTISPECIES:_hypothetical_protein
IMG|UGV-GENOME-4414252_21	No significant similarity	No significant similarity	MULTISPECIES:_hypothetical_protein
IMG|UGV-GENOME-4414252_22	No significant similarity	No significant similarity	hypothetical_protein
IMG|UGV-GENOME-4414252_23	No significant similarity	No significant similarity	MULTISPECIES:_hypothetical_protein
IMG|UGV-GENOME-4414252_24	No significant similarity	No significant similarity	No significant similarity
IMG|UGV-GENOME-4414252_25	No significant similarity	No significant similarity	MarR_family_transcriptional_regulator
IMG|UGV-GENOME-4414252_26	No significant similarity	No significant similarity	hypothetical_protein
IMG|UGV-GENOME-4414252_27	No significant similarity	No significant similarity	hypothetical_protein
IMG|UGV-GENOME-4414252_28	ERF	ERF superfamily	hypothetical_protein
IMG|UGV-GENOME-4414252_29	No significant similarity	No significant similarity	MULTISPECIES:_hypothetical_protein
IMG|UGV-GENOME-4414252_30	No significant similarity	No significant similarity	MULTISPECIES:_hypothetical_protein
IMG|UGV-GENOME-4414252_31	No significant similarity	No significant similarity	hypothetical_protein_Msm_1648
IMG|UGV-GENOME-4414252_32	No significant similarity	No significant similarity	No significant similarity
IMG|UGV-GENOME-4414252_33	DDE_Tnp_IS240	DDE domain	DDE-type_integrase/transposase/recombinase
IMG|UGV-GENOME-4414252_34	Bro-N	BRO family, N-terminal domain	hypothetical_protein
IMG|UGV-GENOME-4414252_35	No significant similarity	No significant similarity	hypothetical_protein
IMG|UGV-GENOME-4414252_36	No significant similarity	No significant similarity	MULTISPECIES:_hypothetical_protein
IMG|UGV-GENOME-4414252_37	DUF2283	Protein of unknown function (DUF2283)	DUF2283_domain-containing_protein
IMG|UGV-GENOME-4414252_38	No significant similarity	No significant similarity	hypothetical_protein
IMG|UGV-GENOME-4414252_39	Phage_integrase	Phage integrase family	MULTISPECIES:_site-specific_integrase
IMG|UGV-GENOME-4414252_40	No significant similarity	No significant similarity	hypothetical_protein
IMG|UGV-GENOME-4414252_41	No significant similarity	No significant similarity	No significant similarity
IMG|UGV-GENOME-4414252_42	Peptidase_C71	Pseudomurein endo-isopeptidase Pei	hypothetical_protein
IMG|UGV-GENOME-4414252_43	No significant similarity	No significant similarity	hypothetical_protein_Msm_1690
IMG|UGV-GENOME-4414252_44	No significant similarity	No significant similarity	collagen-like_protein
IMG|UGV-GENOME-4414252_45	No significant similarity	No significant similarity	hypothetical_protein
IMG|UGV-GENOME-4414252_46	No significant similarity	No significant similarity	hypothetical_protein
IMG|UGV-GENOME-4414252_47	Sipho_tail	Phage tail protein	hypothetical_protein
IMG|UGV-GENOME-0256087_1	No significant similarity	No significant similarity	MULTISPECIES:_hypothetical_protein
IMG|UGV-GENOME-0256087_2	No significant similarity	No significant similarity	hypothetical_protein
IMG|UGV-GENOME-0256087_3	No significant similarity	No significant similarity	hypothetical_protein
IMG|UGV-GENOME-0256087_4	No significant similarity	No significant similarity	MULTISPECIES:_hypothetical_protein
IMG|UGV-GENOME-0256087_5	Sipho_tail	Phage tail protein	hypothetical_protein
IMG|UGV-GENOME-0256087_6	No significant similarity	No significant similarity	MULTISPECIES:_hypothetical_protein
IMG|UGV-GENOME-0256087_7	No significant similarity	No significant similarity	hypothetical_protein
IMG|UGV-GENOME-0256087_8	No significant similarity	No significant similarity	collagen-like_protein
IMG|UGV-GENOME-0256087_9	No significant similarity	No significant similarity	hypothetical_protein_Msm_1690
IMG|UGV-GENOME-0256087_10	Peptidase_C71	Pseudomurein endo-isopeptidase Pei	MULTISPECIES:_PeiW-related_protein_(phage_psiM100)
IMG|UGV-GENOME-0256087_11	No significant similarity	No significant similarity	hypothetical_protein
IMG|UGV-GENOME-0256087_12	Phage_integrase	Phage integrase family	MULTISPECIES:_site-specific_integrase
IMG|UGV-GENOME-0256087_13	No significant similarity	No significant similarity	hypothetical_protein
IMG|UGV-GENOME-0256087_14	DUF2283	Protein of unknown function (DUF2283)	DUF2283_domain-containing_protein
IMG|UGV-GENOME-0256087_15	No significant similarity	No significant similarity	hypothetical_protein
IMG|UGV-GENOME-0256087_16	No significant similarity	No significant similarity	No significant similarity
IMG|UGV-GENOME-0256087_17	Virulence_RhuM	Virulence protein RhuM family	virulence_RhuM_family_protein
IMG|UGV-GENOME-0256087_18	No significant similarity	No significant similarity	hypothetical_protein
IMG|UGV-GENOME-0256087_19	No significant similarity	No significant similarity	No significant similarity
IMG|UGV-GENOME-0256087_20	No significant similarity	No significant similarity	hypothetical_protein_Msm_1648
IMG|UGV-GENOME-0256087_21	No significant similarity	No significant similarity	MULTISPECIES:_hypothetical_protein
IMG|UGV-GENOME-0256087_22	No significant similarity	No significant similarity	MULTISPECIES:_hypothetical_protein
IMG|UGV-GENOME-0256087_23	No significant similarity	No significant similarity	hypothetical_protein
IMG|UGV-GENOME-0256087_24	No significant similarity	No significant similarity	hypothetical_protein
IMG|UGV-GENOME-0256087_25	ERF	ERF superfamily	hypothetical_protein
IMG|UGV-GENOME-0256087_26	No significant similarity	No significant similarity	No significant similarity
IMG|UGV-GENOME-0256087_27	No significant similarity	No significant similarity	No significant similarity
IMG|UGV-GENOME-0256087_28	No significant similarity	No significant similarity	MarR_family_transcriptional_regulator
IMG|UGV-GENOME-0256087_29	No significant similarity	No significant similarity	hypothetical_protein
IMG|UGV-GENOME-0256087_30	No significant similarity	No significant similarity	hypothetical_protein_Msm_1662
IMG|UGV-GENOME-0256087_31	No significant similarity	No significant similarity	No significant similarity
IMG|UGV-GENOME-0256087_32	No significant similarity	No significant similarity	hypothetical_protein
IMG|UGV-GENOME-0256087_33	No significant similarity	No significant similarity	hypothetical_protein
IMG|UGV-GENOME-0256087_34	No significant similarity	No significant similarity	MULTISPECIES:_hypothetical_protein
IMG|UGV-GENOME-0256087_35	No significant similarity	No significant similarity	hypothetical_protein
IMG|UGV-GENOME-0256087_36	No significant similarity	No significant similarity	No significant similarity
IMG|UGV-GENOME-0256087_37	No significant similarity	No significant similarity	hypothetical_protein_Msm_1668
IMG|UGV-GENOME-0256087_38	No significant similarity	No significant similarity	hypothetical_protein
IMG|UGV-GENOME-0256087_39	No significant similarity	No significant similarity	hypothetical_protein
IMG|UGV-GENOME-0256087_40	Terminase_6	Terminase RNaseH-like domain	hypothetical_protein
IMG|UGV-GENOME-0256087_41	Phage_portal	Phage portal protein	phage_portal_protein
IMG|UGV-GENOME-0256087_42	No significant similarity	No significant similarity	hypothetical_protein
IMG|UGV-GENOME-0256087_43	No significant similarity	No significant similarity	hypothetical_protein
IMG|UGV-GENOME-0256087_44	No significant similarity	No significant similarity	hypothetical_protein
IMG|UGV-GENOME-0256087_45	Peptidase_S78_2	Putative phage serine protease XkdF	hypothetical_protein
IMG|UGV-GENOME-0256087_46	No significant similarity	No significant similarity	hypothetical_protein
IMG|UGV-GENOME-0256087_47	Phage_capsid	Phage capsid family	MULTISPECIES:_phage_capsid_protein
IMG|UGV-GENOME-0256087_48	No significant similarity	No significant similarity	MULTISPECIES:_hypothetical_protein
IMG|UGV-GENOME-0256087_49	No significant similarity	No significant similarity	hypothetical_protein
IMG|UGV-GENOME-0256087_50	No significant similarity	No significant similarity	MULTISPECIES:_hypothetical_protein
IMG|UGV-GENOME-0256087_51	No significant similarity	No significant similarity	MULTISPECIES:_hypothetical_protein
GPD|uvig_281916_1	No significant similarity	No significant similarity	hypothetical_protein
GPD|uvig_281916_2	No significant similarity	No significant similarity	No significant similarity
GPD|uvig_281916_3	No significant similarity	No significant similarity	hypothetical_protein
GPD|uvig_281916_4	DUF2283	Protein of unknown function (DUF2283)	DUF2283_domain-containing_protein
GPD|uvig_281916_5	No significant similarity	No significant similarity	hypothetical_protein
GPD|uvig_281916_6	Phage_integrase	Phage integrase family	site-specific_integrase
GPD|uvig_281916_7	No significant similarity	No significant similarity	No significant similarity
GPD|uvig_281916_8	No significant similarity	No significant similarity	hypothetical_protein
GPD|uvig_281916_9	No significant similarity	No significant similarity	No significant similarity
GPD|uvig_281916_10	Peptidase_C71	Pseudomurein endo-isopeptidase Pei	hypothetical_protein
GPD|uvig_281916_11	No significant similarity	No significant similarity	hypothetical_protein_Msm_1690
GPD|uvig_281916_12	Collagen	Collagen triple helix repeat (20 copies)	putative_collagen-like_protein_B
GPD|uvig_281916_13	PTR	Phage tail repeat like	hypothetical_protein_Msm_1688
GPD|uvig_281916_14	No significant similarity	No significant similarity	MULTISPECIES:_hypothetical_protein
GPD|uvig_281916_15	Sipho_tail	Phage tail protein	hypothetical_protein
GPD|uvig_281916_16	No significant similarity	No significant similarity	MULTISPECIES:_hypothetical_protein
GPD|uvig_281916_17	No significant similarity	No significant similarity	hypothetical_protein
GPD|uvig_281916_18	No significant similarity	No significant similarity	hypothetical_protein
GPD|uvig_281916_19	No significant similarity	No significant similarity	hypothetical_protein
GPD|uvig_281916_20	No significant similarity	No significant similarity	MULTISPECIES:_hypothetical_protein
GPD|uvig_281916_21	No significant similarity	No significant similarity	MULTISPECIES:_hypothetical_protein
GPD|uvig_281916_22	No significant similarity	No significant similarity	hypothetical_protein
GPD|uvig_281916_23	No significant similarity	No significant similarity	MULTISPECIES:_hypothetical_protein
GPD|uvig_281916_24	Phage_capsid	Phage capsid family	MULTISPECIES:_phage_capsid_protein
GPD|uvig_281916_25	No significant similarity	No significant similarity	MULTISPECIES:_hypothetical_protein
GPD|uvig_281916_26	Peptidase_S78_2	Putative phage serine protease XkdF	hypothetical_protein
GPD|uvig_281916_27	No significant similarity	No significant similarity	hypothetical_protein_METSMIALI_00363
GPD|uvig_281916_28	No significant similarity	No significant similarity	hypothetical_protein
GPD|uvig_281916_29	Phage_portal	Phage portal protein	phage_portal_protein
GPD|uvig_281916_30	Terminase_6C	Terminase RNaseH-like domain	hypothetical_protein
GPD|uvig_281916_31	No significant similarity	No significant similarity	hypothetical_protein
GPD|uvig_281916_32	No significant similarity	No significant similarity	MULTISPECIES:_hypothetical_protein
GPD|uvig_281916_33	No significant similarity	No significant similarity	hypothetical_protein_Msm_1668
GPD|uvig_281916_34	No significant similarity	No significant similarity	No significant similarity
GPD|uvig_281916_35	No significant similarity	No significant similarity	hypothetical_protein
GPD|uvig_281916_36	No significant similarity	No significant similarity	MULTISPECIES:_hypothetical_protein
GPD|uvig_281916_37	No significant similarity	No significant similarity	MULTISPECIES:_hypothetical_protein
GPD|uvig_281916_38	No significant similarity	No significant similarity	MULTISPECIES:_hypothetical_protein
GPD|uvig_281916_39	No significant similarity	No significant similarity	hypothetical_protein_Msm_1662
GPD|uvig_281916_40	No significant similarity	No significant similarity	No significant similarity
GPD|uvig_281916_41	No significant similarity	No significant similarity	hypothetical_protein
GPD|uvig_281916_42	No significant similarity	No significant similarity	hypothetical_protein
GPD|uvig_281916_43	No significant similarity	No significant similarity	hypothetical_protein
GPD|uvig_281916_44	No significant similarity	No significant similarity	hypothetical_protein
GPD|uvig_281916_45	ERF	ERF superfamily	hypothetical_protein
GPD|uvig_281916_46	No significant similarity	No significant similarity	hypothetical_protein
GPD|uvig_281916_47	No significant similarity	No significant similarity	MULTISPECIES:_hypothetical_protein
GPD|uvig_281916_48	No significant similarity	No significant similarity	hypothetical_protein_Msm_1648
GPD|uvig_281916_49	MazE_antitoxin	Antidote-toxin recognition MazE, bacterial antitoxin	No significant similarity
GPD|uvig_281916_50	No significant similarity	No significant similarity	hypothetical_protein
provir|Zeller_G_2014_MSB_CCIS95409808ST-4-0.NODE_65_149891_1	No significant similarity	No significant similarity	hypothetical_protein_BZ134_00125
provir|Zeller_G_2014_MSB_CCIS95409808ST-4-0.NODE_65_149891_2	No significant similarity	No significant similarity	No significant similarity
provir|Zeller_G_2014_MSB_CCIS95409808ST-4-0.NODE_65_149891_3	YafQ_toxin	Bacterial toxin of type II toxin-antitoxin system, YafQ	hypothetical_protein_BZ136_09025
provir|Zeller_G_2014_MSB_CCIS95409808ST-4-0.NODE_65_149891_4	No significant similarity	No significant similarity	hypothetical_protein
provir|Zeller_G_2014_MSB_CCIS95409808ST-4-0.NODE_65_149891_5	No significant similarity	No significant similarity	hypothetical_protein
provir|Zeller_G_2014_MSB_CCIS95409808ST-4-0.NODE_65_149891_6	DUF4041	Domain of unknown function (DUF4041)	DUF4041_domain-containing_protein
provir|Zeller_G_2014_MSB_CCIS95409808ST-4-0.NODE_65_149891_7	MazE_antitoxin	Antidote-toxin recognition MazE, bacterial antitoxin	No significant similarity
provir|Zeller_G_2014_MSB_CCIS95409808ST-4-0.NODE_65_149891_8	No significant similarity	No significant similarity	hypothetical_protein_Msm_1648
provir|Zeller_G_2014_MSB_CCIS95409808ST-4-0.NODE_65_149891_9	No significant similarity	No significant similarity	MULTISPECIES:_hypothetical_protein
provir|Zeller_G_2014_MSB_CCIS95409808ST-4-0.NODE_65_149891_10	No significant similarity	No significant similarity	MULTISPECIES:_hypothetical_protein
provir|Zeller_G_2014_MSB_CCIS95409808ST-4-0.NODE_65_149891_11	No significant similarity	No significant similarity	hypothetical_protein
provir|Zeller_G_2014_MSB_CCIS95409808ST-4-0.NODE_65_149891_12	No significant similarity	No significant similarity	hypothetical_protein
provir|Zeller_G_2014_MSB_CCIS95409808ST-4-0.NODE_65_149891_13	ERF	ERF superfamily	hypothetical_protein
provir|Zeller_G_2014_MSB_CCIS95409808ST-4-0.NODE_65_149891_14	No significant similarity	No significant similarity	No significant similarity
provir|Zeller_G_2014_MSB_CCIS95409808ST-4-0.NODE_65_149891_15	No significant similarity	No significant similarity	No significant similarity
provir|Zeller_G_2014_MSB_CCIS95409808ST-4-0.NODE_65_149891_16	No significant similarity	No significant similarity	MarR_family_transcriptional_regulator
provir|Zeller_G_2014_MSB_CCIS95409808ST-4-0.NODE_65_149891_17	No significant similarity	No significant similarity	MULTISPECIES:_hypothetical_protein
provir|Zeller_G_2014_MSB_CCIS95409808ST-4-0.NODE_65_149891_18	No significant similarity	No significant similarity	No significant similarity
provir|Zeller_G_2014_MSB_CCIS95409808ST-4-0.NODE_65_149891_19	No significant similarity	No significant similarity	hypothetical_protein
provir|Zeller_G_2014_MSB_CCIS95409808ST-4-0.NODE_65_149891_20	No significant similarity	No significant similarity	hypothetical_protein_Msm_1662
provir|Zeller_G_2014_MSB_CCIS95409808ST-4-0.NODE_65_149891_21	No significant similarity	No significant similarity	No significant similarity
provir|Zeller_G_2014_MSB_CCIS95409808ST-4-0.NODE_65_149891_22	No significant similarity	No significant similarity	hypothetical_protein
provir|Zeller_G_2014_MSB_CCIS95409808ST-4-0.NODE_65_149891_23	No significant similarity	No significant similarity	hypothetical_protein
provir|Zeller_G_2014_MSB_CCIS95409808ST-4-0.NODE_65_149891_24	No significant similarity	No significant similarity	MULTISPECIES:_hypothetical_protein
provir|Zeller_G_2014_MSB_CCIS95409808ST-4-0.NODE_65_149891_25	No significant similarity	No significant similarity	hypothetical_protein
provir|Zeller_G_2014_MSB_CCIS95409808ST-4-0.NODE_65_149891_26	No significant similarity	No significant similarity	No significant similarity
provir|Zeller_G_2014_MSB_CCIS95409808ST-4-0.NODE_65_149891_27	No significant similarity	No significant similarity	hypothetical_protein_Msm_1668
provir|Zeller_G_2014_MSB_CCIS95409808ST-4-0.NODE_65_149891_28	No significant similarity	No significant similarity	hypothetical_protein
provir|Zeller_G_2014_MSB_CCIS95409808ST-4-0.NODE_65_149891_29	No significant similarity	No significant similarity	hypothetical_protein
provir|Zeller_G_2014_MSB_CCIS95409808ST-4-0.NODE_65_149891_30	Terminase_6C	Terminase RNaseH-like domain	MULTISPECIES:_large_terminase_subunit
provir|Zeller_G_2014_MSB_CCIS95409808ST-4-0.NODE_65_149891_31	Phage_portal	Phage portal protein	phage_portal_protein
provir|Zeller_G_2014_MSB_CCIS95409808ST-4-0.NODE_65_149891_32	No significant similarity	No significant similarity	hypothetical_protein
provir|Zeller_G_2014_MSB_CCIS95409808ST-4-0.NODE_65_149891_33	No significant similarity	No significant similarity	hypothetical_protein_METSMIALI_00363
provir|Zeller_G_2014_MSB_CCIS95409808ST-4-0.NODE_65_149891_34	Peptidase_S78_2	Putative phage serine protease XkdF	hypothetical_protein
provir|Zeller_G_2014_MSB_CCIS95409808ST-4-0.NODE_65_149891_35	No significant similarity	No significant similarity	MULTISPECIES:_hypothetical_protein
provir|Zeller_G_2014_MSB_CCIS95409808ST-4-0.NODE_65_149891_36	Phage_capsid	Phage capsid family	MULTISPECIES:_phage_capsid_protein
provir|Zeller_G_2014_MSB_CCIS95409808ST-4-0.NODE_65_149891_37	No significant similarity	No significant similarity	MULTISPECIES:_hypothetical_protein
provir|Zeller_G_2014_MSB_CCIS95409808ST-4-0.NODE_65_149891_38	No significant similarity	No significant similarity	hypothetical_protein
provir|Zeller_G_2014_MSB_CCIS95409808ST-4-0.NODE_65_149891_39	No significant similarity	No significant similarity	MULTISPECIES:_hypothetical_protein
provir|Zeller_G_2014_MSB_CCIS95409808ST-4-0.NODE_65_149891_40	No significant similarity	No significant similarity	MULTISPECIES:_hypothetical_protein
provir|Zeller_G_2014_MSB_CCIS95409808ST-4-0.NODE_65_149891_41	No significant similarity	No significant similarity	hypothetical_protein
provir|Zeller_G_2014_MSB_CCIS95409808ST-4-0.NODE_65_149891_42	No significant similarity	No significant similarity	hypothetical_protein
provir|Zeller_G_2014_MSB_CCIS95409808ST-4-0.NODE_65_149891_43	No significant similarity	No significant similarity	hypothetical_protein
provir|Zeller_G_2014_MSB_CCIS95409808ST-4-0.NODE_65_149891_44	No significant similarity	No significant similarity	MULTISPECIES:_hypothetical_protein
provir|Zeller_G_2014_MSB_CCIS95409808ST-4-0.NODE_65_149891_45	Sipho_tail	Phage tail protein	hypothetical_protein_Msm_1686
provir|Zeller_G_2014_MSB_CCIS95409808ST-4-0.NODE_65_149891_46	No significant similarity	No significant similarity	MULTISPECIES:_hypothetical_protein
provir|Zeller_G_2014_MSB_CCIS95409808ST-4-0.NODE_65_149891_47	No significant similarity	No significant similarity	hypothetical_protein
provir|Zeller_G_2014_MSB_CCIS95409808ST-4-0.NODE_65_149891_48	No significant similarity	No significant similarity	putative_collagen-like_protein_B
provir|Zeller_G_2014_MSB_CCIS95409808ST-4-0.NODE_65_149891_49	No significant similarity	No significant similarity	hypothetical_protein_Msm_1690
provir|Zeller_G_2014_MSB_CCIS95409808ST-4-0.NODE_65_149891_50	Peptidase_C71	Pseudomurein endo-isopeptidase Pei	hypothetical_protein
provir|Zeller_G_2014_MSB_CCIS90164298ST-4-0.NODE_164_78593_1	No significant similarity	No significant similarity	putative_collagen-like_protein_B
provir|Zeller_G_2014_MSB_CCIS90164298ST-4-0.NODE_164_78593_2	PTR	Phage tail repeat like	hypothetical_protein_Msm_1688
provir|Zeller_G_2014_MSB_CCIS90164298ST-4-0.NODE_164_78593_3	No significant similarity	No significant similarity	MULTISPECIES:_hypothetical_protein
provir|Zeller_G_2014_MSB_CCIS90164298ST-4-0.NODE_164_78593_4	Sipho_tail	Phage tail protein	hypothetical_protein
provir|Zeller_G_2014_MSB_CCIS90164298ST-4-0.NODE_164_78593_5	No significant similarity	No significant similarity	MULTISPECIES:_hypothetical_protein
provir|Zeller_G_2014_MSB_CCIS90164298ST-4-0.NODE_164_78593_6	No significant similarity	No significant similarity	hypothetical_protein
provir|Zeller_G_2014_MSB_CCIS90164298ST-4-0.NODE_164_78593_7	No significant similarity	No significant similarity	hypothetical_protein
provir|Zeller_G_2014_MSB_CCIS90164298ST-4-0.NODE_164_78593_8	No significant similarity	No significant similarity	hypothetical_protein
provir|Zeller_G_2014_MSB_CCIS90164298ST-4-0.NODE_164_78593_9	No significant similarity	No significant similarity	MULTISPECIES:_hypothetical_protein
provir|Zeller_G_2014_MSB_CCIS90164298ST-4-0.NODE_164_78593_10	No significant similarity	No significant similarity	MULTISPECIES:_hypothetical_protein
provir|Zeller_G_2014_MSB_CCIS90164298ST-4-0.NODE_164_78593_11	No significant similarity	No significant similarity	hypothetical_protein
provir|Zeller_G_2014_MSB_CCIS90164298ST-4-0.NODE_164_78593_12	No significant similarity	No significant similarity	MULTISPECIES:_hypothetical_protein
provir|Zeller_G_2014_MSB_CCIS90164298ST-4-0.NODE_164_78593_13	Phage_capsid	Phage capsid family	MULTISPECIES:_phage_capsid_protein
provir|Zeller_G_2014_MSB_CCIS90164298ST-4-0.NODE_164_78593_14	No significant similarity	No significant similarity	MULTISPECIES:_hypothetical_protein
provir|Zeller_G_2014_MSB_CCIS90164298ST-4-0.NODE_164_78593_15	Peptidase_S78_2	Putative phage serine protease XkdF	hypothetical_protein
provir|Zeller_G_2014_MSB_CCIS90164298ST-4-0.NODE_164_78593_16	No significant similarity	No significant similarity	hypothetical_protein
provir|Zeller_G_2014_MSB_CCIS90164298ST-4-0.NODE_164_78593_17	No significant similarity	No significant similarity	hypothetical_protein
provir|Zeller_G_2014_MSB_CCIS90164298ST-4-0.NODE_164_78593_18	Phage_portal	Phage portal protein	phage_portal_protein
provir|Zeller_G_2014_MSB_CCIS90164298ST-4-0.NODE_164_78593_19	Terminase_6C	Terminase RNaseH-like domain	hypothetical_protein
provir|Zeller_G_2014_MSB_CCIS90164298ST-4-0.NODE_164_78593_20	No significant similarity	No significant similarity	hypothetical_protein
provir|Zeller_G_2014_MSB_CCIS90164298ST-4-0.NODE_164_78593_21	No significant similarity	No significant similarity	MULTISPECIES:_hypothetical_protein
provir|Zeller_G_2014_MSB_CCIS90164298ST-4-0.NODE_164_78593_22	No significant similarity	No significant similarity	hypothetical_protein_Msm_1668
provir|Zeller_G_2014_MSB_CCIS90164298ST-4-0.NODE_164_78593_23	No significant similarity	No significant similarity	No significant similarity
provir|Zeller_G_2014_MSB_CCIS90164298ST-4-0.NODE_164_78593_24	No significant similarity	No significant similarity	MULTISPECIES:_hypothetical_protein
provir|Zeller_G_2014_MSB_CCIS90164298ST-4-0.NODE_164_78593_25	No significant similarity	No significant similarity	MULTISPECIES:_hypothetical_protein
provir|Zeller_G_2014_MSB_CCIS90164298ST-4-0.NODE_164_78593_26	No significant similarity	No significant similarity	MULTISPECIES:_hypothetical_protein
provir|Zeller_G_2014_MSB_CCIS90164298ST-4-0.NODE_164_78593_27	No significant similarity	No significant similarity	MULTISPECIES:_hypothetical_protein
provir|Zeller_G_2014_MSB_CCIS90164298ST-4-0.NODE_164_78593_28	No significant similarity	No significant similarity	hypothetical_protein_Msm_1662
provir|Zeller_G_2014_MSB_CCIS90164298ST-4-0.NODE_164_78593_29	No significant similarity	No significant similarity	No significant similarity
provir|Zeller_G_2014_MSB_CCIS90164298ST-4-0.NODE_164_78593_30	No significant similarity	No significant similarity	hypothetical_protein
provir|Zeller_G_2014_MSB_CCIS90164298ST-4-0.NODE_164_78593_31	No significant similarity	No significant similarity	hypothetical_protein
provir|Zeller_G_2014_MSB_CCIS90164298ST-4-0.NODE_164_78593_32	ERF	ERF superfamily	hypothetical_protein
provir|Zeller_G_2014_MSB_CCIS90164298ST-4-0.NODE_164_78593_33	No significant similarity	No significant similarity	hypothetical_protein
provir|Zeller_G_2014_MSB_CCIS90164298ST-4-0.NODE_164_78593_34	No significant similarity	No significant similarity	hypothetical_protein
provir|Zeller_G_2014_MSB_CCIS90164298ST-4-0.NODE_164_78593_35	No significant similarity	No significant similarity	hypothetical_protein
provir|Zeller_G_2014_MSB_CCIS90164298ST-4-0.NODE_164_78593_36	No significant similarity	No significant similarity	MULTISPECIES:_hypothetical_protein
provir|Zeller_G_2014_MSB_CCIS90164298ST-4-0.NODE_164_78593_37	No significant similarity	No significant similarity	hypothetical_protein_Msm_1648
provir|Zeller_G_2014_MSB_CCIS90164298ST-4-0.NODE_164_78593_38	No significant similarity	No significant similarity	No significant similarity
provir|Zeller_G_2014_MSB_CCIS90164298ST-4-0.NODE_164_78593_39	SHOCT	Short C-terminal domain	hypothetical_protein_METSMIALI_00786,_partial
provir|Zeller_G_2014_MSB_CCIS90164298ST-4-0.NODE_164_78593_40	No significant similarity	No significant similarity	hypothetical_protein
provir|Zeller_G_2014_MSB_CCIS90164298ST-4-0.NODE_164_78593_41	No significant similarity	No significant similarity	hypothetical_protein
provir|Zeller_G_2014_MSB_CCIS90164298ST-4-0.NODE_164_78593_42	No significant similarity	No significant similarity	No significant similarity
provir|Zeller_G_2014_MSB_CCIS90164298ST-4-0.NODE_164_78593_43	No significant similarity	No significant similarity	hypothetical_protein
provir|Zeller_G_2014_MSB_CCIS90164298ST-4-0.NODE_164_78593_44	DUF2283	Protein of unknown function (DUF2283)	DUF2283_domain-containing_protein
provir|Zeller_G_2014_MSB_CCIS90164298ST-4-0.NODE_164_78593_45	No significant similarity	No significant similarity	hypothetical_protein
provir|Zeller_G_2014_MSB_CCIS90164298ST-4-0.NODE_164_78593_46	Phage_integrase	Phage integrase family	site-specific_integrase
provir|Rampelli_S_2020_mSystems_SRR9654999.NODE_52_92916_1	No significant similarity	No significant similarity	No significant similarity
provir|Rampelli_S_2020_mSystems_SRR9654999.NODE_52_92916_2	Peptidase_C71	Pseudomurein endo-isopeptidase Pei	hypothetical_protein
provir|Rampelli_S_2020_mSystems_SRR9654999.NODE_52_92916_3	No significant similarity	No significant similarity	hypothetical_protein_Msm_1690
provir|Rampelli_S_2020_mSystems_SRR9654999.NODE_52_92916_4	No significant similarity	No significant similarity	collagen-like_protein
provir|Rampelli_S_2020_mSystems_SRR9654999.NODE_52_92916_5	No significant similarity	No significant similarity	hypothetical_protein
provir|Rampelli_S_2020_mSystems_SRR9654999.NODE_52_92916_6	No significant similarity	No significant similarity	hypothetical_protein
provir|Rampelli_S_2020_mSystems_SRR9654999.NODE_52_92916_7	Sipho_tail	Phage tail protein	hypothetical_protein
provir|Rampelli_S_2020_mSystems_SRR9654999.NODE_52_92916_8	No significant similarity	No significant similarity	MULTISPECIES:_hypothetical_protein
provir|Rampelli_S_2020_mSystems_SRR9654999.NODE_52_92916_9	No significant similarity	No significant similarity	hypothetical_protein
provir|Rampelli_S_2020_mSystems_SRR9654999.NODE_52_92916_10	No significant similarity	No significant similarity	hypothetical_protein
provir|Rampelli_S_2020_mSystems_SRR9654999.NODE_52_92916_11	No significant similarity	No significant similarity	hypothetical_protein
provir|Rampelli_S_2020_mSystems_SRR9654999.NODE_52_92916_12	No significant similarity	No significant similarity	hypothetical_protein
provir|Rampelli_S_2020_mSystems_SRR9654999.NODE_52_92916_13	No significant similarity	No significant similarity	MULTISPECIES:_hypothetical_protein
provir|Rampelli_S_2020_mSystems_SRR9654999.NODE_52_92916_14	No significant similarity	No significant similarity	MULTISPECIES:_hypothetical_protein
provir|Rampelli_S_2020_mSystems_SRR9654999.NODE_52_92916_15	No significant similarity	No significant similarity	MULTISPECIES:_hypothetical_protein
provir|Rampelli_S_2020_mSystems_SRR9654999.NODE_52_92916_16	Phage_capsid	Phage capsid family	MULTISPECIES:_phage_capsid_protein
provir|Rampelli_S_2020_mSystems_SRR9654999.NODE_52_92916_17	No significant similarity	No significant similarity	MULTISPECIES:_hypothetical_protein
provir|Rampelli_S_2020_mSystems_SRR9654999.NODE_52_92916_18	Peptidase_S78_2	Putative phage serine protease XkdF	hypothetical_protein
provir|Rampelli_S_2020_mSystems_SRR9654999.NODE_52_92916_19	No significant similarity	No significant similarity	No significant similarity
provir|Rampelli_S_2020_mSystems_SRR9654999.NODE_52_92916_20	No significant similarity	No significant similarity	hypothetical_protein_CIT02_06540
provir|Rampelli_S_2020_mSystems_SRR9654999.NODE_52_92916_21	No significant similarity	No significant similarity	hypothetical_protein
provir|Rampelli_S_2020_mSystems_SRR9654999.NODE_52_92916_22	No significant similarity	No significant similarity	hypothetical_protein
provir|Rampelli_S_2020_mSystems_SRR9654999.NODE_52_92916_23	Phage_portal	Phage portal protein	phage_portal_protein
provir|Rampelli_S_2020_mSystems_SRR9654999.NODE_52_92916_24	Terminase_6C	Terminase RNaseH-like domain	MULTISPECIES:_large_terminase_subunit
provir|Rampelli_S_2020_mSystems_SRR9654999.NODE_52_92916_25	No significant similarity	No significant similarity	hypothetical_protein
provir|Rampelli_S_2020_mSystems_SRR9654999.NODE_52_92916_26	No significant similarity	No significant similarity	MULTISPECIES:_hypothetical_protein
provir|Rampelli_S_2020_mSystems_SRR9654999.NODE_52_92916_27	No significant similarity	No significant similarity	hypothetical_protein_Msm_1668
provir|Rampelli_S_2020_mSystems_SRR9654999.NODE_52_92916_28	No significant similarity	No significant similarity	No significant similarity
provir|Rampelli_S_2020_mSystems_SRR9654999.NODE_52_92916_29	No significant similarity	No significant similarity	hypothetical_protein
provir|Rampelli_S_2020_mSystems_SRR9654999.NODE_52_92916_30	No significant similarity	No significant similarity	MULTISPECIES:_hypothetical_protein
provir|Rampelli_S_2020_mSystems_SRR9654999.NODE_52_92916_31	No significant similarity	No significant similarity	hypothetical_protein
provir|Rampelli_S_2020_mSystems_SRR9654999.NODE_52_92916_32	No significant similarity	No significant similarity	MULTISPECIES:_hypothetical_protein
provir|Rampelli_S_2020_mSystems_SRR9654999.NODE_52_92916_33	No significant similarity	No significant similarity	hypothetical_protein_Msm_1662
provir|Rampelli_S_2020_mSystems_SRR9654999.NODE_52_92916_34	No significant similarity	No significant similarity	No significant similarity
provir|Rampelli_S_2020_mSystems_SRR9654999.NODE_52_92916_35	No significant similarity	No significant similarity	hypothetical_protein
provir|Rampelli_S_2020_mSystems_SRR9654999.NODE_52_92916_36	No significant similarity	No significant similarity	MarR_family_transcriptional_regulator
provir|Rampelli_S_2020_mSystems_SRR9654999.NODE_52_92916_37	No significant similarity	No significant similarity	hypothetical_protein
provir|Rampelli_S_2020_mSystems_SRR9654999.NODE_52_92916_38	No significant similarity	No significant similarity	hypothetical_protein
provir|Rampelli_S_2020_mSystems_SRR9654999.NODE_52_92916_39	ERF	ERF superfamily	hypothetical_protein
provir|Rampelli_S_2020_mSystems_SRR9654999.NODE_52_92916_40	No significant similarity	No significant similarity	No significant similarity
provir|Rampelli_S_2020_mSystems_SRR9654999.NODE_52_92916_41	No significant similarity	No significant similarity	hypothetical_protein
provir|Rampelli_S_2020_mSystems_SRR9654999.NODE_52_92916_42	No significant similarity	No significant similarity	hypothetical_protein
provir|Rampelli_S_2020_mSystems_SRR9654999.NODE_52_92916_43	No significant similarity	No significant similarity	MULTISPECIES:_hypothetical_protein
provir|Rampelli_S_2020_mSystems_SRR9654999.NODE_52_92916_44	No significant similarity	No significant similarity	hypothetical_protein_Msm_1648
provir|Rampelli_S_2020_mSystems_SRR9654999.NODE_52_92916_45	No significant similarity	No significant similarity	No significant similarity

## Sheet: VC_326
ORF Name	Pfam	Pfam_description	NR_description
GPD|uvig_86060_1	No significant similarity	No significant similarity	hypothetical_protein
GPD|uvig_86060_2	No significant similarity	No significant similarity	hypothetical_protein
GPD|uvig_86060_3	No significant similarity	No significant similarity	No significant similarity
GPD|uvig_86060_4	No significant similarity	No significant similarity	No significant similarity
GPD|uvig_86060_5	No significant similarity	No significant similarity	hypothetical_protein
GPD|uvig_86060_6	No significant similarity	No significant similarity	No significant similarity
GPD|uvig_86060_7	No significant similarity	No significant similarity	hypothetical_protein
GPD|uvig_86060_8	No significant similarity	No significant similarity	hypothetical_protein
GPD|uvig_86060_9	No significant similarity	No significant similarity	hypothetical_protein
GPD|uvig_86060_10	No significant similarity	No significant similarity	No significant similarity
GPD|uvig_86060_11	No significant similarity	No significant similarity	No significant similarity
GPD|uvig_86060_12	No significant similarity	No significant similarity	No significant similarity
GPD|uvig_86060_13	No significant similarity	No significant similarity	No significant similarity
GPD|uvig_86060_14	No significant similarity	No significant similarity	No significant similarity
GPD|uvig_86060_15	No significant similarity	No significant similarity	No significant similarity
GPD|uvig_86060_16	No significant similarity	No significant similarity	hypothetical_protein
GPD|uvig_86060_17	No significant similarity	No significant similarity	MULTISPECIES:_ASCH_domain-containing_protein
GPD|uvig_86060_18	No significant similarity	No significant similarity	hypothetical_protein
GPD|uvig_86060_19	No significant similarity	No significant similarity	hypothetical_protein
GPD|uvig_86060_20	No significant similarity	No significant similarity	hypothetical_protein
GPD|uvig_86060_21	No significant similarity	No significant similarity	hypothetical_protein
GPD|uvig_86060_22	ERF	ERF superfamily	MULTISPECIES:_hypothetical_protein
GPD|uvig_86060_23	No significant similarity	No significant similarity	hypothetical_protein
GPD|uvig_86060_24	No significant similarity	No significant similarity	hypothetical_protein
GPD|uvig_86060_25	No significant similarity	No significant similarity	hypothetical_protein
GPD|uvig_86060_26	No significant similarity	No significant similarity	hypothetical_protein
GPD|uvig_86060_27	No significant similarity	No significant similarity	MULTISPECIES:_hypothetical_protein
GPD|uvig_86060_28	No significant similarity	No significant similarity	No significant similarity
GPD|uvig_86060_29	No significant similarity	No significant similarity	No significant similarity
GPD|uvig_86060_30	No significant similarity	No significant similarity	hypothetical_protein
GPD|uvig_86060_31	No significant similarity	No significant similarity	No significant similarity
GPD|uvig_86060_32	No significant similarity	No significant similarity	hypothetical_protein
GPD|uvig_86060_33	Phage_integrase	Phage integrase family	integrase
GPD|uvig_86060_34	Peptidase_C71	Pseudomurein endo-isopeptidase Pei	hypothetical_protein
GPD|uvig_86060_35	Prophage_tail	Prophage endopeptidase tail	hypothetical_protein
GPD|uvig_86060_36	Sipho_tail	Phage tail protein	hypothetical_protein
GPD|uvig_86060_37	Big_3_5	Bacterial Ig-like domain (group 3)	Ig-like_domain_repeat_protein
GPD|uvig_86060_38	No significant similarity	No significant similarity	No significant similarity
GPD|uvig_86060_39	Big_1	Bacterial Ig-like domain (group 1)	hypothetical_protein
GPD|uvig_86060_40	Apolipoprotein	Apolipoprotein A1/A4/E domain	hypothetical_protein
GPD|uvig_86060_41	No significant similarity	No significant similarity	hypothetical_protein
GPD|uvig_86060_42	CarboxypepD_reg	Carboxypeptidase regulatory-like domain	carboxypeptidase_regulatory-like_domain-containing_protein
GPD|uvig_86060_43	No significant similarity	No significant similarity	hypothetical_protein
GPD|uvig_86060_44	No significant similarity	No significant similarity	HK97_gp10_family_phage_protein
GPD|uvig_86060_45	No significant similarity	No significant similarity	hypothetical_protein
GPD|uvig_86060_46	No significant similarity	No significant similarity	No significant similarity
GPD|uvig_86060_47	No significant similarity	No significant similarity	hypothetical_protein
GPD|uvig_86060_48	Peptidase_S78_2	Putative phage serine protease XkdF	hypothetical_protein
GPD|uvig_86060_49	No significant similarity	No significant similarity	hypothetical_protein
GPD|uvig_86060_50	Phage_Mu_F	Phage Mu protein F like protein	hypothetical_protein
GPD|uvig_86060_51	Phage_portal	Phage portal protein	phage_portal_protein
GPD|uvig_86060_52	Terminase_6C	Terminase RNaseH-like domain	hypothetical_protein
GPD|uvig_183331_1	No significant similarity	No significant similarity	hypothetical_protein
GPD|uvig_183331_2	No significant similarity	No significant similarity	ASCH_domain-containing_protein
GPD|uvig_183331_3	No significant similarity	No significant similarity	hypothetical_protein
GPD|uvig_183331_4	No significant similarity	No significant similarity	hypothetical_protein
GPD|uvig_183331_5	No significant similarity	No significant similarity	hypothetical_protein
GPD|uvig_183331_6	No significant similarity	No significant similarity	No significant similarity
GPD|uvig_183331_7	No significant similarity	No significant similarity	No significant similarity
GPD|uvig_183331_8	No significant similarity	No significant similarity	No significant similarity
GPD|uvig_183331_9	No significant similarity	No significant similarity	hypothetical_protein
GPD|uvig_183331_10	No significant similarity	No significant similarity	No significant similarity
GPD|uvig_183331_11	No significant similarity	No significant similarity	No significant similarity
GPD|uvig_183331_12	No significant similarity	No significant similarity	hypothetical_protein
GPD|uvig_183331_13	No significant similarity	No significant similarity	hypothetical_protein
GPD|uvig_183331_14	Terminase_6C	Terminase RNaseH-like domain	hypothetical_protein
GPD|uvig_183331_15	Phage_portal	Phage portal protein	phage_portal_protein
GPD|uvig_183331_16	Phage_Mu_F	Phage Mu protein F like protein	hypothetical_protein
GPD|uvig_183331_17	No significant similarity	No significant similarity	putative_uncharacterized_protein
GPD|uvig_183331_18	No significant similarity	No significant similarity	hypothetical_protein
GPD|uvig_183331_19	No significant similarity	No significant similarity	hypothetical_protein
GPD|uvig_183331_20	Peptidase_S78_2	Putative phage serine protease XkdF	hypothetical_protein
GPD|uvig_183331_21	No significant similarity	No significant similarity	hypothetical_protein
GPD|uvig_183331_22	No significant similarity	No significant similarity	No significant similarity
GPD|uvig_183331_23	No significant similarity	No significant similarity	hypothetical_protein
GPD|uvig_183331_24	No significant similarity	No significant similarity	HK97_gp10_family_phage_protein
GPD|uvig_183331_25	No significant similarity	No significant similarity	hypothetical_protein
GPD|uvig_183331_26	CarboxypepD_reg	Carboxypeptidase regulatory-like domain	carboxypeptidase_regulatory-like_domain-containing_protein
GPD|uvig_183331_27	No significant similarity	No significant similarity	hypothetical_protein
GPD|uvig_183331_28	Apolipoprotein	Apolipoprotein A1/A4/E domain	hypothetical_protein
GPD|uvig_183331_29	Big_1	Bacterial Ig-like domain (group 1)	hypothetical_protein
GPD|uvig_183331_30	Big_3_5	Bacterial Ig-like domain (group 3)	Ig-like_domain_repeat_protein
GPD|uvig_183331_31	Sipho_tail	Phage tail protein	hypothetical_protein
GPD|uvig_183331_32	Prophage_tail	Prophage endopeptidase tail	hypothetical_protein
GPD|uvig_183331_33	Peptidase_C71	Pseudomurein endo-isopeptidase Pei	hypothetical_protein
GPD|uvig_183331_34	Phage_integrase	Phage integrase family	integrase
GPD|uvig_183331_35	No significant similarity	No significant similarity	hypothetical_protein
GPD|uvig_183331_36	MazE_antitoxin	Antidote-toxin recognition MazE, bacterial antitoxin	No significant similarity
GPD|uvig_183331_37	No significant similarity	No significant similarity	No significant similarity
GPD|uvig_183331_38	No significant similarity	No significant similarity	No significant similarity
GPD|uvig_183331_39	No significant similarity	No significant similarity	MULTISPECIES:_hypothetical_protein
GPD|uvig_183331_40	No significant similarity	No significant similarity	hypothetical_protein
GPD|uvig_183331_41	No significant similarity	No significant similarity	hypothetical_protein
GPD|uvig_183331_42	No significant similarity	No significant similarity	hypothetical_protein_Msm_1652
GPD|uvig_183331_43	ERF	ERF superfamily	hypothetical_protein
GPD|uvig_183331_44	No significant similarity	No significant similarity	hypothetical_protein
GPD|uvig_183331_45	No significant similarity	No significant similarity	hypothetical_protein
GPD|uvig_183331_46	No significant similarity	No significant similarity	No significant similarity
GPD|uvig_552897_1	Phage_integrase	Phage integrase family	integrase
GPD|uvig_552897_2	No significant similarity	No significant similarity	hypothetical_protein
GPD|uvig_552897_3	MazE_antitoxin	Antidote-toxin recognition MazE, bacterial antitoxin	No significant similarity
GPD|uvig_552897_4	No significant similarity	No significant similarity	hypothetical_protein
GPD|uvig_552897_5	No significant similarity	No significant similarity	No significant similarity
GPD|uvig_552897_6	No significant similarity	No significant similarity	No significant similarity
GPD|uvig_552897_7	No significant similarity	No significant similarity	MULTISPECIES:_hypothetical_protein
GPD|uvig_552897_8	No significant similarity	No significant similarity	hypothetical_protein
GPD|uvig_552897_9	No significant similarity	No significant similarity	hypothetical_protein
GPD|uvig_552897_10	No significant similarity	No significant similarity	hypothetical_protein
GPD|uvig_552897_11	No significant similarity	No significant similarity	hypothetical_protein_Msm_1653
GPD|uvig_552897_12	ERF	ERF superfamily	hypothetical_protein
GPD|uvig_552897_13	No significant similarity	No significant similarity	hypothetical_protein
GPD|uvig_552897_14	No significant similarity	No significant similarity	MULTISPECIES:_hypothetical_protein
GPD|uvig_552897_15	No significant similarity	No significant similarity	hypothetical_protein
GPD|uvig_552897_16	No significant similarity	No significant similarity	hypothetical_protein
GPD|uvig_552897_17	No significant similarity	No significant similarity	MULTISPECIES:_ASCH_domain-containing_protein
GPD|uvig_552897_18	No significant similarity	No significant similarity	hypothetical_protein
GPD|uvig_552897_19	No significant similarity	No significant similarity	No significant similarity
GPD|uvig_552897_20	No significant similarity	No significant similarity	hypothetical_protein_Msm_1662
GPD|uvig_552897_21	No significant similarity	No significant similarity	hypothetical_protein
GPD|uvig_552897_22	No significant similarity	No significant similarity	hypothetical_protein
GPD|uvig_552897_23	No significant similarity	No significant similarity	hypothetical_protein
GPD|uvig_552897_24	No significant similarity	No significant similarity	hypothetical_protein
GPD|uvig_552897_25	No significant similarity	No significant similarity	No significant similarity
GPD|uvig_552897_26	No significant similarity	No significant similarity	No significant similarity
GPD|uvig_552897_27	No significant similarity	No significant similarity	hypothetical_protein
GPD|uvig_552897_28	No significant similarity	No significant similarity	hypothetical_protein
GPD|uvig_552897_29	Terminase_6C	Terminase RNaseH-like domain	hypothetical_protein
GPD|uvig_552897_30	Phage_portal	Phage portal protein	phage_portal_protein
GPD|uvig_552897_31	Phage_Mu_F	Phage Mu protein F like protein	hypothetical_protein
GPD|uvig_552897_32	No significant similarity	No significant similarity	hypothetical_protein
GPD|uvig_552897_33	Peptidase_S78_2	Putative phage serine protease XkdF	hypothetical_protein
GPD|uvig_552897_34	No significant similarity	No significant similarity	hypothetical_protein
GPD|uvig_552897_35	No significant similarity	No significant similarity	No significant similarity
GPD|uvig_552897_36	No significant similarity	No significant similarity	hypothetical_protein
GPD|uvig_552897_37	No significant similarity	No significant similarity	HK97_gp10_family_phage_protein
GPD|uvig_552897_38	No significant similarity	No significant similarity	hypothetical_protein
GPD|uvig_552897_39	CarboxypepD_reg	Carboxypeptidase regulatory-like domain	carboxypeptidase_regulatory-like_domain-containing_protein
GPD|uvig_552897_40	No significant similarity	No significant similarity	hypothetical_protein
GPD|uvig_552897_41	Apolipoprotein	Apolipoprotein A1/A4/E domain	hypothetical_protein
GPD|uvig_552897_42	Big_1	Bacterial Ig-like domain (group 1)	hypothetical_protein
GPD|uvig_552897_43	Big_3_5	Bacterial Ig-like domain (group 3)	Ig-like_domain_repeat_protein
GPD|uvig_552897_44	Sipho_tail	Phage tail protein	hypothetical_protein
GPD|uvig_552897_45	Prophage_tail	Prophage endopeptidase tail	hypothetical_protein
GPD|uvig_552897_46	Peptidase_C71	Pseudomurein endo-isopeptidase Pei	hypothetical_protein
GPD|uvig_558467_1	No significant similarity	No significant similarity	No significant similarity
GPD|uvig_558467_2	Big_3_5	Bacterial Ig-like domain (group 3)	Ig-like_domain_repeat_protein
GPD|uvig_558467_3	Sipho_tail	Phage tail protein	hypothetical_protein
GPD|uvig_558467_4	Prophage_tail	Prophage endopeptidase tail	hypothetical_protein
GPD|uvig_558467_5	Peptidase_C71	Pseudomurein endo-isopeptidase Pei	hypothetical_protein
GPD|uvig_558467_6	Phage_integrase	Phage integrase family	integrase
GPD|uvig_558467_7	No significant similarity	No significant similarity	hypothetical_protein
GPD|uvig_558467_8	No significant similarity	No significant similarity	No significant similarity
GPD|uvig_558467_9	No significant similarity	No significant similarity	No significant similarity
GPD|uvig_558467_10	No significant similarity	No significant similarity	No significant similarity
GPD|uvig_558467_11	No significant similarity	No significant similarity	No significant similarity
GPD|uvig_558467_12	No significant similarity	No significant similarity	MULTISPECIES:_hypothetical_protein
GPD|uvig_558467_13	No significant similarity	No significant similarity	hypothetical_protein
GPD|uvig_558467_14	No significant similarity	No significant similarity	hypothetical_protein
GPD|uvig_558467_15	No significant similarity	No significant similarity	hypothetical_protein
GPD|uvig_558467_16	ERF	ERF superfamily	hypothetical_protein
GPD|uvig_558467_17	No significant similarity	No significant similarity	hypothetical_protein
GPD|uvig_558467_18	No significant similarity	No significant similarity	hypothetical_protein
GPD|uvig_558467_19	No significant similarity	No significant similarity	No significant similarity
GPD|uvig_558467_20	No significant similarity	No significant similarity	MULTISPECIES:_ASCH_domain-containing_protein
GPD|uvig_558467_21	No significant similarity	No significant similarity	hypothetical_protein
GPD|uvig_558467_22	No significant similarity	No significant similarity	No significant similarity
GPD|uvig_558467_23	No significant similarity	No significant similarity	hypothetical_protein_Msm_1662
GPD|uvig_558467_24	No significant similarity	No significant similarity	hypothetical_protein
GPD|uvig_558467_25	No significant similarity	No significant similarity	hypothetical_protein
GPD|uvig_558467_26	No significant similarity	No significant similarity	hypothetical_protein
GPD|uvig_558467_27	No significant similarity	No significant similarity	hypothetical_protein
GPD|uvig_558467_28	No significant similarity	No significant similarity	No significant similarity
GPD|uvig_558467_29	No significant similarity	No significant similarity	No significant similarity
GPD|uvig_558467_30	No significant similarity	No significant similarity	hypothetical_protein
GPD|uvig_558467_31	No significant similarity	No significant similarity	hypothetical_protein
GPD|uvig_558467_32	Terminase_6C	Terminase RNaseH-like domain	hypothetical_protein
GPD|uvig_558467_33	Phage_portal	Phage portal protein	phage_portal_protein
GPD|uvig_558467_34	Phage_Mu_F	Phage Mu protein F like protein	hypothetical_protein
GPD|uvig_558467_35	No significant similarity	No significant similarity	hypothetical_protein
GPD|uvig_558467_36	Peptidase_S78_2	Putative phage serine protease XkdF	hypothetical_protein
GPD|uvig_558467_37	No significant similarity	No significant similarity	hypothetical_protein
GPD|uvig_558467_38	No significant similarity	No significant similarity	No significant similarity
GPD|uvig_558467_39	No significant similarity	No significant similarity	hypothetical_protein
GPD|uvig_558467_40	No significant similarity	No significant similarity	HK97_gp10_family_phage_protein
GPD|uvig_558467_41	No significant similarity	No significant similarity	hypothetical_protein
GPD|uvig_558467_42	CarboxypepD_reg	Carboxypeptidase regulatory-like domain	carboxypeptidase_regulatory-like_domain-containing_protein
GPD|uvig_558467_43	No significant similarity	No significant similarity	hypothetical_protein
GPD|uvig_558467_44	Apolipoprotein	Apolipoprotein A1/A4/E domain	hypothetical_protein
HMP.763678604.contig63623_40452_1	Phage_integrase	Phage integrase family	No significant similarity	site-specific_integrase
HMP.763678604.contig63623_40452_2	No significant similarity	No significant similarity	No significant similarity	hypothetical_protein
HMP.763678604.contig63623_40452_3	MazE_antitoxin	Antidote-toxin recognition MazE, bacterial antitoxin	No significant similarity
HMP.763678604.contig63623_40452_4	No significant similarity	No significant similarity	No significant similarity	hypothetical_protein
HMP.763678604.contig63623_40452_5	No significant similarity	No significant similarity	No significant similarity
HMP.763678604.contig63623_40452_6	No significant similarity	No significant similarity	No significant similarity
HMP.763678604.contig63623_40452_7	No significant similarity	No significant similarity	No significant similarity	MULTISPECIES:_hypothetical_protein
HMP.763678604.contig63623_40452_8	No significant similarity	No significant similarity	No significant similarity	hypothetical_protein
HMP.763678604.contig63623_40452_9	No significant similarity	No significant similarity	No significant similarity	hypothetical_protein
HMP.763678604.contig63623_40452_10	No significant similarity	No significant similarity	No significant similarity	hypothetical_protein
HMP.763678604.contig63623_40452_11	No significant similarity	No significant similarity	No significant similarity	hypothetical_protein
HMP.763678604.contig63623_40452_12	ERF	ERF superfamily	No significant similarity	MULTISPECIES:_hypothetical_protein
HMP.763678604.contig63623_40452_13	No significant similarity	No significant similarity	No significant similarity	hypothetical_protein
HMP.763678604.contig63623_40452_14	No significant similarity	No significant similarity	No significant similarity	hypothetical_protein
HMP.763678604.contig63623_40452_15	No significant similarity	No significant similarity	No significant similarity	hypothetical_protein
HMP.763678604.contig63623_40452_16	No significant similarity	No significant similarity	No significant similarity
HMP.763678604.contig63623_40452_17	No significant similarity	No significant similarity	No significant similarity	hypothetical_protein
HMP.763678604.contig63623_40452_18	No significant similarity	No significant similarity	No significant similarity
HMP.763678604.contig63623_40452_19	No significant similarity	No significant similarity	No significant similarity	MULTISPECIES:_hypothetical_protein
HMP.763678604.contig63623_40452_20	ASCH	ASCH domain	No significant similarity	ASCH_domain-containing_protein
HMP.763678604.contig63623_40452_21	No significant similarity	No significant similarity	No significant similarity	hypothetical_protein
HMP.763678604.contig63623_40452_22	No significant similarity	No significant similarity	No significant similarity	hypothetical_protein
HMP.763678604.contig63623_40452_23	No significant similarity	No significant similarity	No significant similarity
HMP.763678604.contig63623_40452_24	No significant similarity	No significant similarity	No significant similarity	hypothetical_protein_Msm_1662
HMP.763678604.contig63623_40452_25	No significant similarity	No significant similarity	No significant similarity	hypothetical_protein
HMP.763678604.contig63623_40452_26	No significant similarity	No significant similarity	No significant similarity	hypothetical_protein
HMP.763678604.contig63623_40452_27	No significant similarity	No significant similarity	No significant similarity	hypothetical_protein
HMP.763678604.contig63623_40452_28	No significant similarity	No significant similarity	No significant similarity	hypothetical_protein
HMP.763678604.contig63623_40452_29	No significant similarity	No significant similarity	No significant similarity	hypothetical_protein
HMP.763678604.contig63623_40452_30	No significant similarity	No significant similarity	No significant similarity
HMP.763678604.contig63623_40452_31	No significant similarity	No significant similarity	No significant similarity
HMP.763678604.contig63623_40452_32	No significant similarity	No significant similarity	No significant similarity	hypothetical_protein
HMP.763678604.contig63623_40452_33	No significant similarity	No significant similarity	No significant similarity	hypothetical_protein
HMP.763678604.contig63623_40452_34	Terminase_6C	Terminase RNaseH-like domain	No significant similarity	hypothetical_protein
HMP.763678604.contig63623_40452_35	Phage_portal	Phage portal protein	No significant similarity	phage_portal_protein
HMP.763678604.contig63623_40452_36	Phage_Mu_F	Phage Mu protein F like protein	No significant similarity	hypothetical_protein
HMP.763678604.contig63623_40452_37	No significant similarity	No significant similarity	No significant similarity	hypothetical_protein
HMP.763678604.contig63623_40452_38	No significant similarity	No significant similarity	No significant similarity	hypothetical_protein
HMP.763678604.contig63623_40452_39	No significant similarity	No significant similarity	No significant similarity	hypothetical_protein
HMP.763678604.contig63623_40452_40	Peptidase_S78_2	Putative phage serine protease XkdF	No significant similarity	hypothetical_protein
HMP.763678604.contig63623_40452_41	No significant similarity	No significant similarity	No significant similarity	hypothetical_protein
HMP.763678604.contig63623_40452_42	No significant similarity	No significant similarity	No significant similarity
HMP.763678604.contig63623_40452_43	No significant similarity	No significant similarity	No significant similarity	hypothetical_protein
HMP.763678604.contig63623_40452_44	No significant similarity	No significant similarity	No significant similarity	HK97_gp10_family_phage_protein
HMP.763678604.contig63623_40452_45	No significant similarity	No significant similarity	No significant similarity	hypothetical_protein
HMP.763678604.contig63623_40452_46	CarboxypepD_reg	Carboxypeptidase regulatory-like domain	No significant similarity	carboxypeptidase_regulatory-like_domain-containing_protein
HMP.763678604.contig63623_40452_47	No significant similarity	No significant similarity	No significant similarity	hypothetical_protein
HMP.763678604.contig63623_40452_48	Apolipoprotein	Apolipoprotein A1/A4/E domain	No significant similarity	hypothetical_protein
HMP.763678604.contig63623_40452_49	Big_1	Bacterial Ig-like domain (group 1)	No significant similarity	hypothetical_protein
HMP.763678604.contig63623_40452_50	No significant similarity	No significant similarity	No significant similarity	hypothetical_protein
HMP.763678604.contig63623_40452_51	Big_3_5	Bacterial Ig-like domain (group 3)	No significant similarity	Ig-like_domain_repeat_protein
HMP.763678604.contig63623_40452_52	Sipho_tail	Phage tail protein	No significant similarity	hypothetical_protein
HMP.763678604.contig63623_40452_53	Prophage_tail	Prophage endopeptidase tail	No significant similarity	hypothetical_protein
HMP.763678604.contig63623_40452_54	Peptidase_C71	Pseudomurein endo-isopeptidase Pei	No significant similarity	hypothetical_protein
PVD|GVD|Zuo_2017_SRR5677806_NODE_21_length_40158_cov_338.408149_1	Big_3_5	Bacterial Ig-like domain (group 3)	Ig-like_domain_repeat_protein
PVD|GVD|Zuo_2017_SRR5677806_NODE_21_length_40158_cov_338.408149_2	Sipho_tail	Phage tail protein	hypothetical_protein
PVD|GVD|Zuo_2017_SRR5677806_NODE_21_length_40158_cov_338.408149_3	Prophage_tail	Prophage endopeptidase tail	hypothetical_protein
PVD|GVD|Zuo_2017_SRR5677806_NODE_21_length_40158_cov_338.408149_4	Peptidase_C71	Pseudomurein endo-isopeptidase Pei	hypothetical_protein
PVD|GVD|Zuo_2017_SRR5677806_NODE_21_length_40158_cov_338.408149_5	Phage_integrase	Phage integrase family	integrase
PVD|GVD|Zuo_2017_SRR5677806_NODE_21_length_40158_cov_338.408149_6	No significant similarity	No significant similarity	hypothetical_protein
PVD|GVD|Zuo_2017_SRR5677806_NODE_21_length_40158_cov_338.408149_7	MazE_antitoxin	Antidote-toxin recognition MazE, bacterial antitoxin	No significant similarity
PVD|GVD|Zuo_2017_SRR5677806_NODE_21_length_40158_cov_338.408149_8	No significant similarity	No significant similarity	hypothetical_protein
PVD|GVD|Zuo_2017_SRR5677806_NODE_21_length_40158_cov_338.408149_9	No significant similarity	No significant similarity	No significant similarity
PVD|GVD|Zuo_2017_SRR5677806_NODE_21_length_40158_cov_338.408149_10	No significant similarity	No significant similarity	No significant similarity
PVD|GVD|Zuo_2017_SRR5677806_NODE_21_length_40158_cov_338.408149_11	No significant similarity	No significant similarity	MULTISPECIES:_hypothetical_protein
PVD|GVD|Zuo_2017_SRR5677806_NODE_21_length_40158_cov_338.408149_12	No significant similarity	No significant similarity	hypothetical_protein
PVD|GVD|Zuo_2017_SRR5677806_NODE_21_length_40158_cov_338.408149_13	No significant similarity	No significant similarity	hypothetical_protein
PVD|GVD|Zuo_2017_SRR5677806_NODE_21_length_40158_cov_338.408149_14	No significant similarity	No significant similarity	hypothetical_protein
PVD|GVD|Zuo_2017_SRR5677806_NODE_21_length_40158_cov_338.408149_15	No significant similarity	No significant similarity	hypothetical_protein_Msm_1653
PVD|GVD|Zuo_2017_SRR5677806_NODE_21_length_40158_cov_338.408149_16	ERF	ERF superfamily	hypothetical_protein
PVD|GVD|Zuo_2017_SRR5677806_NODE_21_length_40158_cov_338.408149_17	No significant similarity	No significant similarity	hypothetical_protein
PVD|GVD|Zuo_2017_SRR5677806_NODE_21_length_40158_cov_338.408149_18	No significant similarity	No significant similarity	hypothetical_protein
PVD|GVD|Zuo_2017_SRR5677806_NODE_21_length_40158_cov_338.408149_19	No significant similarity	No significant similarity	hypothetical_protein
PVD|GVD|Zuo_2017_SRR5677806_NODE_21_length_40158_cov_338.408149_20	No significant similarity	No significant similarity	No significant similarity
PVD|GVD|Zuo_2017_SRR5677806_NODE_21_length_40158_cov_338.408149_21	No significant similarity	No significant similarity	hypothetical_protein
PVD|GVD|Zuo_2017_SRR5677806_NODE_21_length_40158_cov_338.408149_22	No significant similarity	No significant similarity	ASCH_domain-containing_protein
PVD|GVD|Zuo_2017_SRR5677806_NODE_21_length_40158_cov_338.408149_23	No significant similarity	No significant similarity	hypothetical_protein_Msm_1662
PVD|GVD|Zuo_2017_SRR5677806_NODE_21_length_40158_cov_338.408149_24	No significant similarity	No significant similarity	hypothetical_protein
PVD|GVD|Zuo_2017_SRR5677806_NODE_21_length_40158_cov_338.408149_25	No significant similarity	No significant similarity	hypothetical_protein
PVD|GVD|Zuo_2017_SRR5677806_NODE_21_length_40158_cov_338.408149_26	No significant similarity	No significant similarity	hypothetical_protein
PVD|GVD|Zuo_2017_SRR5677806_NODE_21_length_40158_cov_338.408149_27	No significant similarity	No significant similarity	hypothetical_protein
PVD|GVD|Zuo_2017_SRR5677806_NODE_21_length_40158_cov_338.408149_28	No significant similarity	No significant similarity	No significant similarity
PVD|GVD|Zuo_2017_SRR5677806_NODE_21_length_40158_cov_338.408149_29	No significant similarity	No significant similarity	No significant similarity
PVD|GVD|Zuo_2017_SRR5677806_NODE_21_length_40158_cov_338.408149_30	No significant similarity	No significant similarity	No significant similarity
PVD|GVD|Zuo_2017_SRR5677806_NODE_21_length_40158_cov_338.408149_31	No significant similarity	No significant similarity	hypothetical_protein
PVD|GVD|Zuo_2017_SRR5677806_NODE_21_length_40158_cov_338.408149_32	No significant similarity	No significant similarity	No significant similarity
PVD|GVD|Zuo_2017_SRR5677806_NODE_21_length_40158_cov_338.408149_33	No significant similarity	No significant similarity	No significant similarity
PVD|GVD|Zuo_2017_SRR5677806_NODE_21_length_40158_cov_338.408149_34	No significant similarity	No significant similarity	hypothetical_protein
PVD|GVD|Zuo_2017_SRR5677806_NODE_21_length_40158_cov_338.408149_35	No significant similarity	No significant similarity	hypothetical_protein
PVD|GVD|Zuo_2017_SRR5677806_NODE_21_length_40158_cov_338.408149_36	Terminase_6C	Terminase RNaseH-like domain	hypothetical_protein
PVD|GVD|Zuo_2017_SRR5677806_NODE_21_length_40158_cov_338.408149_37	Phage_portal	Phage portal protein	phage_portal_protein
PVD|GVD|Zuo_2017_SRR5677806_NODE_21_length_40158_cov_338.408149_38	Phage_Mu_F	Phage Mu protein F like protein	hypothetical_protein
PVD|GVD|Zuo_2017_SRR5677806_NODE_21_length_40158_cov_338.408149_39	No significant similarity	No significant similarity	hypothetical_protein
PVD|GVD|Zuo_2017_SRR5677806_NODE_21_length_40158_cov_338.408149_40	Peptidase_S78_2	Putative phage serine protease XkdF	hypothetical_protein
PVD|GVD|Zuo_2017_SRR5677806_NODE_21_length_40158_cov_338.408149_41	No significant similarity	No significant similarity	hypothetical_protein
PVD|GVD|Zuo_2017_SRR5677806_NODE_21_length_40158_cov_338.408149_42	No significant similarity	No significant similarity	No significant similarity
PVD|GVD|Zuo_2017_SRR5677806_NODE_21_length_40158_cov_338.408149_43	No significant similarity	No significant similarity	hypothetical_protein
PVD|GVD|Zuo_2017_SRR5677806_NODE_21_length_40158_cov_338.408149_44	No significant similarity	No significant similarity	HK97_gp10_family_phage_protein
PVD|GVD|Zuo_2017_SRR5677806_NODE_21_length_40158_cov_338.408149_45	No significant similarity	No significant similarity	hypothetical_protein
PVD|GVD|Zuo_2017_SRR5677806_NODE_21_length_40158_cov_338.408149_46	CarboxypepD_reg	Carboxypeptidase regulatory-like domain	carboxypeptidase_regulatory-like_domain-containing_protein
PVD|GVD|Zuo_2017_SRR5677806_NODE_21_length_40158_cov_338.408149_47	No significant similarity	No significant similarity	hypothetical_protein
PVD|GVD|Zuo_2017_SRR5677806_NODE_21_length_40158_cov_338.408149_48	Apolipoprotein	Apolipoprotein A1/A4/E domain	hypothetical_protein
PVD|GVD|Zuo_2017_SRR5677806_NODE_21_length_40158_cov_338.408149_49	Big_1	Bacterial Ig-like domain (group 1)	hypothetical_protein
PVD|GVD|Zuo_2017_SRR5677806_NODE_21_length_40158_cov_338.408149_50	No significant similarity	No significant similarity	No significant similarity
provir|Feng_Q_2015_NC_ERR688605.NODE_81_93248_1_1	Peptidase_C71	Pseudomurein endo-isopeptidase Pei	No significant similarity
provir|Feng_Q_2015_NC_ERR688605.NODE_81_93248_1_2	Prophage_tail	Prophage endopeptidase tail	No significant similarity
provir|Feng_Q_2015_NC_ERR688605.NODE_81_93248_1_3	Sipho_tail	Phage tail protein	No significant similarity
provir|Feng_Q_2015_NC_ERR688605.NODE_81_93248_1_4	Big_3_5	Bacterial Ig-like domain (group 3)	No significant similarity
provir|Feng_Q_2015_NC_ERR688605.NODE_81_93248_1_5	No significant similarity	No significant similarity	No significant similarity	Phage integrase family
provir|Feng_Q_2015_NC_ERR688605.NODE_81_93248_1_6	Big_1	Bacterial Ig-like domain (group 1)	No significant similarity
provir|Feng_Q_2015_NC_ERR688605.NODE_81_93248_1_7	Apolipoprotein	Apolipoprotein A1/A4/E domain	No significant similarity
provir|Feng_Q_2015_NC_ERR688605.NODE_81_93248_1_8	No significant similarity	No significant similarity	No significant similarity
provir|Feng_Q_2015_NC_ERR688605.NODE_81_93248_1_9	CarboxypepD_reg	Carboxypeptidase regulatory-like domain	No significant similarity
provir|Feng_Q_2015_NC_ERR688605.NODE_81_93248_1_10	No significant similarity	No significant similarity	No significant similarity
provir|Feng_Q_2015_NC_ERR688605.NODE_81_93248_1_11	No significant similarity	No significant similarity	No significant similarity
provir|Feng_Q_2015_NC_ERR688605.NODE_81_93248_1_12	No significant similarity	No significant similarity	No significant similarity
provir|Feng_Q_2015_NC_ERR688605.NODE_81_93248_1_13	No significant similarity	No significant similarity	No significant similarity
provir|Feng_Q_2015_NC_ERR688605.NODE_81_93248_1_14	No significant similarity	No significant similarity	No significant similarity
provir|Feng_Q_2015_NC_ERR688605.NODE_81_93248_1_15	Peptidase_S78_2	Putative phage serine protease XkdF	No significant similarity
provir|Feng_Q_2015_NC_ERR688605.NODE_81_93248_1_16	No significant similarity	No significant similarity	No significant similarity
provir|Feng_Q_2015_NC_ERR688605.NODE_81_93248_1_17	Phage_Mu_F	Phage Mu protein F like protein	No significant similarity
provir|Feng_Q_2015_NC_ERR688605.NODE_81_93248_1_18	Phage_portal	Phage portal protein	No significant similarity
provir|Feng_Q_2015_NC_ERR688605.NODE_81_93248_1_19	Terminase_6C	Terminase RNaseH-like domain	No significant similarity
provir|Feng_Q_2015_NC_ERR688605.NODE_81_93248_1_20	No significant similarity	No significant similarity	No significant similarity
provir|Feng_Q_2015_NC_ERR688605.NODE_81_93248_1_21	No significant similarity	No significant similarity	No significant similarity
provir|Feng_Q_2015_NC_ERR688605.NODE_81_93248_1_22	No significant similarity	No significant similarity	No significant similarity
provir|Feng_Q_2015_NC_ERR688605.NODE_81_93248_1_23	No significant similarity	No significant similarity	No significant similarity
provir|Feng_Q_2015_NC_ERR688605.NODE_81_93248_1_24	No significant similarity	No significant similarity	No significant similarity
provir|Feng_Q_2015_NC_ERR688605.NODE_81_93248_1_25	No significant similarity	No significant similarity	No significant similarity
provir|Feng_Q_2015_NC_ERR688605.NODE_81_93248_1_26	No significant similarity	No significant similarity	No significant similarity
provir|Feng_Q_2015_NC_ERR688605.NODE_81_93248_1_27	No significant similarity	No significant similarity	No significant similarity
provir|Feng_Q_2015_NC_ERR688605.NODE_81_93248_1_28	No significant similarity	No significant similarity	No significant similarity
provir|Feng_Q_2015_NC_ERR688605.NODE_81_93248_1_29	No significant similarity	No significant similarity	No significant similarity
provir|Feng_Q_2015_NC_ERR688605.NODE_81_93248_1_30	No significant similarity	No significant similarity	No significant similarity
provir|Feng_Q_2015_NC_ERR688605.NODE_81_93248_1_31	No significant similarity	No significant similarity	No significant similarity
provir|Feng_Q_2015_NC_ERR688605.NODE_81_93248_1_32	No significant similarity	No significant similarity	No significant similarity
provir|Feng_Q_2015_NC_ERR688605.NODE_81_93248_1_33	No significant similarity	No significant similarity	No significant similarity
provir|Feng_Q_2015_NC_ERR688605.NODE_81_93248_1_34	No significant similarity	No significant similarity	No significant similarity
provir|Feng_Q_2015_NC_ERR688605.NODE_81_93248_1_35	No significant similarity	No significant similarity	No significant similarity
provir|Feng_Q_2015_NC_ERR688605.NODE_81_93248_1_36	No significant similarity	No significant similarity	No significant similarity
provir|Feng_Q_2015_NC_ERR688605.NODE_81_93248_1_37	ERF	ERF superfamily	No significant similarity
provir|Feng_Q_2015_NC_ERR688605.NODE_81_93248_1_38	No significant similarity	No significant similarity	No significant similarity
provir|Feng_Q_2015_NC_ERR688605.NODE_81_93248_1_39	No significant similarity	No significant similarity	No significant similarity
provir|Feng_Q_2015_NC_ERR688605.NODE_81_93248_1_40	No significant similarity	No significant similarity	No significant similarity
provir|Feng_Q_2015_NC_ERR688605.NODE_81_93248_1_41	No significant similarity	No significant similarity	No significant similarity
provir|Feng_Q_2015_NC_ERR688605.NODE_81_93248_1_42	No significant similarity	No significant similarity	No significant similarity
provir|Feng_Q_2015_NC_ERR688605.NODE_81_93248_1_43	No significant similarity	No significant similarity	No significant similarity
provir|Feng_Q_2015_NC_ERR688605.NODE_81_93248_1_44	No significant similarity	No significant similarity	No significant similarity

## Sheet: VC_358
ORF Name	Pfam	Pfam_description	NR_description
GPD|uvig_178408_1	No significant similarity	No significant similarity	No significant similarity
GPD|uvig_178408_2	No significant similarity	No significant similarity	No significant similarity
GPD|uvig_178408_3	No significant similarity	No significant similarity	No significant similarity
GPD|uvig_178408_4	No significant similarity	No significant similarity	hypothetical_protein_BZ134_00335
GPD|uvig_178408_5	No significant similarity	No significant similarity	hypothetical_protein
GPD|uvig_178408_6	PTR	Phage tail repeat like	hypothetical_protein_DBY45_06555
GPD|uvig_178408_7	No significant similarity	No significant similarity	No significant similarity
GPD|uvig_178408_8	No significant similarity	No significant similarity	No significant similarity
GPD|uvig_178408_9	No significant similarity	No significant similarity	hypothetical_protein
GPD|uvig_178408_10	No significant similarity	No significant similarity	hypothetical_protein
GPD|uvig_178408_11	No significant similarity	No significant similarity	hypothetical_protein
GPD|uvig_178408_12	No significant similarity	No significant similarity	No significant similarity
GPD|uvig_178408_13	No significant similarity	No significant similarity	DUF1565_domain-containing_protein
GPD|uvig_178408_14	Baseplate_J	Baseplate J-like protein	hypothetical_protein
GPD|uvig_178408_15	DUF2634	Protein of unknown function (DUF2634)	hypothetical_protein
GPD|uvig_178408_16	No significant similarity	No significant similarity	No significant similarity
GPD|uvig_178408_17	No significant similarity	No significant similarity	hypothetical_protein
GPD|uvig_178408_18	Transglut_core	Transglutaminase-like superfamily	transglutaminase_domain-containing_protein
GPD|uvig_178408_19	No significant similarity	No significant similarity	hypothetical_protein
GPD|uvig_178408_20	No significant similarity	No significant similarity	hypothetical_protein
GPD|uvig_178408_21	No significant similarity	No significant similarity	hypothetical_protein
GPD|uvig_178408_22	No significant similarity	No significant similarity	hypothetical_protein
GPD|uvig_178408_23	No significant similarity	No significant similarity	hypothetical_protein
GPD|uvig_178408_24	No significant similarity	No significant similarity	hypothetical_protein
GPD|uvig_178408_25	No significant similarity	No significant similarity	hypothetical_protein
GPD|uvig_178408_26	No significant similarity	No significant similarity	hypothetical_protein
GPD|uvig_178408_27	No significant similarity	No significant similarity	HK97_gp10_family_phage_protein
GPD|uvig_178408_28	No significant similarity	No significant similarity	hypothetical_protein
GPD|uvig_178408_29	No significant similarity	No significant similarity	hypothetical_protein
GPD|uvig_178408_30	CarboxypepD_reg	Carboxypeptidase regulatory-like domain	exported_hypothetical_protein
GPD|uvig_178408_31	Phage_capsid	Phage capsid family	hypothetical_protein
GPD|uvig_178408_32	No significant similarity	No significant similarity	hypothetical_protein
GPD|uvig_178408_33	No significant similarity	No significant similarity	hypothetical_protein
GPD|uvig_178408_34	Phage_Mu_F	Phage Mu protein F like protein	hypothetical_protein
GPD|uvig_178408_35	Phage_portal	Phage portal protein	phage_portal_protein
GPD|uvig_178408_36	LAGLIDADG_3	LAGLIDADG- like domain	hypothetical_protein
GPD|uvig_178408_37	No significant similarity	No significant similarity	putative_DNA_binding_protein
GPD|uvig_178408_38	N6_N4_Mtase	DNA methylase	site-specific_DNA-methyltransferase
GPD|uvig_178408_39	XhlA	Haemolysin XhlA	No significant similarity
GPD|uvig_178408_40	No significant similarity	No significant similarity	No significant similarity
GPD|uvig_178408_41	No significant similarity	No significant similarity	hypothetical_protein_BZ136_09240
GPD|uvig_178408_42	ERCC4	ERCC4 domain	argininosuccinate_synthase
GPD|uvig_178408_43	No significant similarity	No significant similarity	No significant similarity
GPD|uvig_178408_44	No significant similarity	No significant similarity	No significant similarity
GPD|uvig_178408_45	Fer4	4Fe-4S binding domain	No significant similarity
GPD|uvig_178408_46	No significant similarity	No significant similarity	hypothetical_protein
GPD|uvig_178408_47	No significant similarity	No significant similarity	No significant similarity
GPD|uvig_178408_48	No significant similarity	No significant similarity	No significant similarity
GPD|uvig_178408_49	No significant similarity	No significant similarity	No significant similarity
GPD|uvig_178408_50	No significant similarity	No significant similarity	No significant similarity
GPD|uvig_178408_51	No significant similarity	No significant similarity	No significant similarity
GPD|uvig_178408_52	No significant similarity	No significant similarity	No significant similarity
GPD|uvig_178408_53	No significant similarity	No significant similarity	No significant similarity
GPD|uvig_178408_54	No significant similarity	No significant similarity	hypothetical_protein
GPD|uvig_178408_55	No significant similarity	No significant similarity	MULTISPECIES:_ASCH_domain-containing_protein
GPD|uvig_178408_56	No significant similarity	No significant similarity	MULTISPECIES:_hypothetical_protein
GPD|uvig_178408_57	Phage_integrase	Phage integrase family	tyrosine-type_recombinase/integrase
GPD|uvig_178408_58	N6_Mtase	N-6 DNA Methylase	N-6_DNA_methylase
GPD|uvig_178408_59	No significant similarity	No significant similarity	No significant similarity
GPD|uvig_178408_60	No significant similarity	No significant similarity	No significant similarity
GPD|uvig_178408_61	No significant similarity	No significant similarity	No significant similarity
GPD|uvig_178408_62	No significant similarity	No significant similarity	No significant similarity
GPD|uvig_178408_63	No significant similarity	No significant similarity	No significant similarity
GPD|uvig_178408_64	No significant similarity	No significant similarity	No significant similarity
GPD|uvig_178408_65	No significant similarity	No significant similarity	No significant similarity
GPD|uvig_178408_66	No significant similarity	No significant similarity	hypothetical_protein
GPD|uvig_178408_67	No significant similarity	No significant similarity	No significant similarity
GPD|uvig_178408_68	AAA_24	AAA domain	AAA_family_ATPase
GPD|uvig_178408_69	No significant similarity	No significant similarity	DUF1874_domain-containing_protein
GPD|uvig_178408_70	No significant similarity	No significant similarity	No significant similarity
GPD|uvig_178408_71	No significant similarity	No significant similarity	No significant similarity
GPD|uvig_178408_72	No significant similarity	No significant similarity	No significant similarity
GPD|uvig_178408_73	No significant similarity	No significant similarity	No significant similarity
GPD|uvig_178408_74	No significant similarity	No significant similarity	No significant similarity
GPD|uvig_178408_75	No significant similarity	No significant similarity	No significant similarity
GPD|uvig_178408_76	No significant similarity	No significant similarity	No significant similarity
GPD|uvig_178408_77	No significant similarity	No significant similarity	No significant similarity
GPD|uvig_178408_78	Phage_integrase	Phage integrase family	site-specific_integrase
IMG|UGV-GENOME-0318191_1	No significant similarity	No significant similarity	hypothetical_protein
IMG|UGV-GENOME-0318191_2	DUF5309	Family of unknown function (DUF5309)	hypothetical_protein
IMG|UGV-GENOME-0318191_3	CarboxypepD_reg	Carboxypeptidase regulatory-like domain	exported_hypothetical_protein
IMG|UGV-GENOME-0318191_4	No significant similarity	No significant similarity	No significant similarity
IMG|UGV-GENOME-0318191_5	No significant similarity	No significant similarity	hypothetical_protein
IMG|UGV-GENOME-0318191_6	No significant similarity	No significant similarity	HK97_gp10_family_phage_protein
IMG|UGV-GENOME-0318191_7	No significant similarity	No significant similarity	hypothetical_protein
IMG|UGV-GENOME-0318191_8	No significant similarity	No significant similarity	hypothetical_protein
IMG|UGV-GENOME-0318191_9	No significant similarity	No significant similarity	hypothetical_protein
IMG|UGV-GENOME-0318191_10	No significant similarity	No significant similarity	No significant similarity
IMG|UGV-GENOME-0318191_11	No significant similarity	No significant similarity	hypothetical_protein
IMG|UGV-GENOME-0318191_12	No significant similarity	No significant similarity	hypothetical_protein
IMG|UGV-GENOME-0318191_13	No significant similarity	No significant similarity	hypothetical_protein
IMG|UGV-GENOME-0318191_14	Transglut_core	Transglutaminase-like superfamily	transglutaminase_domain-containing_protein
IMG|UGV-GENOME-0318191_15	No significant similarity	No significant similarity	hypothetical_protein
IMG|UGV-GENOME-0318191_16	No significant similarity	No significant similarity	No significant similarity
IMG|UGV-GENOME-0318191_17	DUF2634	Protein of unknown function (DUF2634)	hypothetical_protein
IMG|UGV-GENOME-0318191_18	Baseplate_J	Baseplate J-like protein	hypothetical_protein
IMG|UGV-GENOME-0318191_19	No significant similarity	No significant similarity	DUF1565_domain-containing_protein
IMG|UGV-GENOME-0318191_20	No significant similarity	No significant similarity	hypothetical_protein
IMG|UGV-GENOME-0318191_21	No significant similarity	No significant similarity	hypothetical_protein
IMG|UGV-GENOME-0318191_22	No significant similarity	No significant similarity	hypothetical_protein
IMG|UGV-GENOME-0318191_23	No significant similarity	No significant similarity	hypothetical_protein
IMG|UGV-GENOME-0318191_24	No significant similarity	No significant similarity	No significant similarity
IMG|UGV-GENOME-0318191_25	No significant similarity	No significant similarity	No significant similarity
IMG|UGV-GENOME-0318191_26	PTR	Phage tail repeat like	hypothetical_protein_Msm_1688
IMG|UGV-GENOME-0318191_27	No significant similarity	No significant similarity	hypothetical_protein_B655_2212
IMG|UGV-GENOME-0318191_28	No significant similarity	No significant similarity	hypothetical_protein
IMG|UGV-GENOME-0318191_29	No significant similarity	No significant similarity	No significant similarity
IMG|UGV-GENOME-0318191_30	No significant similarity	No significant similarity	No significant similarity
IMG|UGV-GENOME-0318191_31	No significant similarity	No significant similarity	hypothetical_protein
IMG|UGV-GENOME-0318191_32	No significant similarity	No significant similarity	TIGR04255_family_protein
IMG|UGV-GENOME-0318191_33	No significant similarity	No significant similarity	No significant similarity
IMG|UGV-GENOME-0318191_34	No significant similarity	No significant similarity	hypothetical_protein
IMG|UGV-GENOME-0318191_35	No significant similarity	No significant similarity	No significant similarity
IMG|UGV-GENOME-0318191_36	No significant similarity	No significant similarity	site-specific_integrase
IMG|UGV-GENOME-0318191_37	DUF4065	Domain of unknown function (DUF4065)	DUF4065_domain-containing_protein
IMG|UGV-GENOME-0318191_38	No significant similarity	No significant similarity	hypothetical_protein
IMG|UGV-GENOME-0318191_39	No significant similarity	No significant similarity	No significant similarity
IMG|UGV-GENOME-0318191_40	No significant similarity	No significant similarity	No significant similarity
IMG|UGV-GENOME-0318191_41	No significant similarity	No significant similarity	No significant similarity
IMG|UGV-GENOME-0318191_42	No significant similarity	No significant similarity	No significant similarity
IMG|UGV-GENOME-0318191_43	No significant similarity	No significant similarity	No significant similarity
IMG|UGV-GENOME-0318191_44	No significant similarity	No significant similarity	No significant similarity
IMG|UGV-GENOME-0318191_45	DUF1874	Domain of unknown function (DUF1874)	DUF1874_domain-containing_protein
IMG|UGV-GENOME-0318191_46	No significant similarity	No significant similarity	hypothetical_protein
IMG|UGV-GENOME-0318191_47	No significant similarity	No significant similarity	hypothetical_protein_A3I35_03015
IMG|UGV-GENOME-0318191_48	No significant similarity	No significant similarity	hypothetical_protein_Drs3_00011
IMG|UGV-GENOME-0318191_49	No significant similarity	No significant similarity	No significant similarity
IMG|UGV-GENOME-0318191_50	Helicase_C_2	Helicase C-terminal domain	hypothetical_protein
IMG|UGV-GENOME-0318191_51	No significant similarity	No significant similarity	No significant similarity
IMG|UGV-GENOME-0318191_52	No significant similarity	No significant similarity	MULTISPECIES:_hypothetical_protein
IMG|UGV-GENOME-0318191_53	No significant similarity	No significant similarity	No significant similarity
IMG|UGV-GENOME-0318191_54	No significant similarity	No significant similarity	No significant similarity
IMG|UGV-GENOME-0318191_55	No significant similarity	No significant similarity	MULTISPECIES:_hypothetical_protein
IMG|UGV-GENOME-0318191_56	No significant similarity	No significant similarity	No significant similarity
IMG|UGV-GENOME-0318191_57	No significant similarity	No significant similarity	No significant similarity
IMG|UGV-GENOME-0318191_58	No significant similarity	No significant similarity	No significant similarity
IMG|UGV-GENOME-0318191_59	ERCC4	ERCC4 domain	DNA_excision_repair_protein_ERCC-4
IMG|UGV-GENOME-0318191_60	No significant similarity	No significant similarity	hypothetical_protein_BZ136_09240
IMG|UGV-GENOME-0318191_61	No significant similarity	No significant similarity	No significant similarity
IMG|UGV-GENOME-0318191_62	No significant similarity	No significant similarity	No significant similarity
IMG|UGV-GENOME-0318191_63	No significant similarity	No significant similarity	hypothetical_protein
IMG|UGV-GENOME-0318191_64	No significant similarity	No significant similarity	hypothetical_protein
IMG|UGV-GENOME-0318191_65	Terminase_6C	Terminase RNaseH-like domain	hypothetical_protein
IMG|UGV-GENOME-0318191_66	Phage_portal	Phage portal protein	phage_portal_protein
IMG|UGV-GENOME-0318191_67	ADPrib_exo_Tox	ADP-ribosyltransferase exoenzyme	hypothetical_protein
IMG|UGV-GENOME-0318191_68	No significant similarity	No significant similarity	hypothetical_protein
IMG|UGV-GENOME-0318191_69	No significant similarity	No significant similarity	hypothetical_protein
IMG|UGV-GENOME-0318191_70	No significant similarity	No significant similarity	No significant similarity
IMG|UGV-GENOME-0318191_71	No significant similarity	No significant similarity	No significant similarity
IMG|UGV-GENOME-4426261_1	No significant similarity	No significant similarity	hypothetical_protein
IMG|UGV-GENOME-4426261_2	No significant similarity	No significant similarity	No significant similarity
IMG|UGV-GENOME-4426261_3	No significant similarity	No significant similarity	No significant similarity
IMG|UGV-GENOME-4426261_4	No significant similarity	No significant similarity	hypothetical_protein
IMG|UGV-GENOME-4426261_5	No significant similarity	No significant similarity	hypothetical_protein_B655_2212
IMG|UGV-GENOME-4426261_6	PTR	Phage tail repeat like	hypothetical_protein_Msm_1688
IMG|UGV-GENOME-4426261_7	No significant similarity	No significant similarity	No significant similarity
IMG|UGV-GENOME-4426261_8	No significant similarity	No significant similarity	No significant similarity
IMG|UGV-GENOME-4426261_9	No significant similarity	No significant similarity	hypothetical_protein
IMG|UGV-GENOME-4426261_10	No significant similarity	No significant similarity	hypothetical_protein
IMG|UGV-GENOME-4426261_11	No significant similarity	No significant similarity	hypothetical_protein
IMG|UGV-GENOME-4426261_12	No significant similarity	No significant similarity	hypothetical_protein
IMG|UGV-GENOME-4426261_13	No significant similarity	No significant similarity	DUF1565_domain-containing_protein
IMG|UGV-GENOME-4426261_14	Baseplate_J	Baseplate J-like protein	hypothetical_protein
IMG|UGV-GENOME-4426261_15	DUF2634	Protein of unknown function (DUF2634)	hypothetical_protein
IMG|UGV-GENOME-4426261_16	No significant similarity	No significant similarity	No significant similarity
IMG|UGV-GENOME-4426261_17	No significant similarity	No significant similarity	hypothetical_protein
IMG|UGV-GENOME-4426261_18	Transglut_core	Transglutaminase-like superfamily	transglutaminase_domain-containing_protein
IMG|UGV-GENOME-4426261_19	No significant similarity	No significant similarity	hypothetical_protein
IMG|UGV-GENOME-4426261_20	No significant similarity	No significant similarity	hypothetical_protein
IMG|UGV-GENOME-4426261_21	No significant similarity	No significant similarity	hypothetical_protein
IMG|UGV-GENOME-4426261_22	No significant similarity	No significant similarity	hypothetical_protein
IMG|UGV-GENOME-4426261_23	No significant similarity	No significant similarity	No significant similarity
IMG|UGV-GENOME-4426261_24	No significant similarity	No significant similarity	hypothetical_protein
IMG|UGV-GENOME-4426261_25	No significant similarity	No significant similarity	hypothetical_protein
IMG|UGV-GENOME-4426261_26	No significant similarity	No significant similarity	hypothetical_protein
IMG|UGV-GENOME-4426261_27	No significant similarity	No significant similarity	HK97_gp10_family_phage_protein
IMG|UGV-GENOME-4426261_28	No significant similarity	No significant similarity	hypothetical_protein
IMG|UGV-GENOME-4426261_29	No significant similarity	No significant similarity	No significant similarity
IMG|UGV-GENOME-4426261_30	CarboxypepD_reg	Carboxypeptidase regulatory-like domain	exported_hypothetical_protein
IMG|UGV-GENOME-4426261_31	DUF5309	Family of unknown function (DUF5309)	hypothetical_protein
IMG|UGV-GENOME-4426261_32	No significant similarity	No significant similarity	hypothetical_protein
IMG|UGV-GENOME-4426261_33	No significant similarity	No significant similarity	No significant similarity
IMG|UGV-GENOME-4426261_34	No significant similarity	No significant similarity	No significant similarity
IMG|UGV-GENOME-4426261_35	No significant similarity	No significant similarity	hypothetical_protein
IMG|UGV-GENOME-4426261_36	No significant similarity	No significant similarity	hypothetical_protein
IMG|UGV-GENOME-4426261_37	ADPrib_exo_Tox	ADP-ribosyltransferase exoenzyme	hypothetical_protein
IMG|UGV-GENOME-4426261_38	Phage_portal	Phage portal protein	phage_portal_protein
IMG|UGV-GENOME-4426261_39	Terminase_6C	Terminase RNaseH-like domain	hypothetical_protein
IMG|UGV-GENOME-4426261_40	No significant similarity	No significant similarity	hypothetical_protein
IMG|UGV-GENOME-4426261_41	No significant similarity	No significant similarity	hypothetical_protein
IMG|UGV-GENOME-4426261_42	No significant similarity	No significant similarity	No significant similarity
IMG|UGV-GENOME-4426261_43	No significant similarity	No significant similarity	No significant similarity
IMG|UGV-GENOME-4426261_44	No significant similarity	No significant similarity	hypothetical_protein_BZ136_09240
IMG|UGV-GENOME-4426261_45	ERCC4	ERCC4 domain	DNA_excision_repair_protein_ERCC-4
IMG|UGV-GENOME-4426261_46	No significant similarity	No significant similarity	No significant similarity
IMG|UGV-GENOME-4426261_47	No significant similarity	No significant similarity	No significant similarity
IMG|UGV-GENOME-4426261_48	No significant similarity	No significant similarity	No significant similarity
IMG|UGV-GENOME-4426261_49	No significant similarity	No significant similarity	MULTISPECIES:_hypothetical_protein
IMG|UGV-GENOME-4426261_50	No significant similarity	No significant similarity	No significant similarity
IMG|UGV-GENOME-4426261_51	No significant similarity	No significant similarity	No significant similarity
IMG|UGV-GENOME-4426261_52	No significant similarity	No significant similarity	MULTISPECIES:_hypothetical_protein
IMG|UGV-GENOME-4426261_53	No significant similarity	No significant similarity	No significant similarity
IMG|UGV-GENOME-4426261_54	Helicase_C_2	Helicase C-terminal domain	hypothetical_protein
IMG|UGV-GENOME-4426261_55	No significant similarity	No significant similarity	No significant similarity
IMG|UGV-GENOME-4426261_56	No significant similarity	No significant similarity	hypothetical_protein_Drs3_00011
IMG|UGV-GENOME-4426261_57	No significant similarity	No significant similarity	hypothetical_protein_A3I35_03015
IMG|UGV-GENOME-4426261_58	No significant similarity	No significant similarity	hypothetical_protein
IMG|UGV-GENOME-4426261_59	DUF1874	Domain of unknown function (DUF1874)	DUF1874_domain-containing_protein
IMG|UGV-GENOME-4426261_60	No significant similarity	No significant similarity	No significant similarity
IMG|UGV-GENOME-4426261_61	No significant similarity	No significant similarity	No significant similarity
IMG|UGV-GENOME-4426261_62	No significant similarity	No significant similarity	No significant similarity
IMG|UGV-GENOME-4426261_63	No significant similarity	No significant similarity	No significant similarity
IMG|UGV-GENOME-4426261_64	No significant similarity	No significant similarity	No significant similarity
IMG|UGV-GENOME-4426261_65	No significant similarity	No significant similarity	No significant similarity
IMG|UGV-GENOME-4426261_66	No significant similarity	No significant similarity	hypothetical_protein
IMG|UGV-GENOME-4426261_67	DUF4065	Domain of unknown function (DUF4065)	DUF4065_domain-containing_protein
IMG|UGV-GENOME-4426261_68	No significant similarity	No significant similarity	site-specific_integrase
IMG|UGV-GENOME-4426261_69	No significant similarity	No significant similarity	No significant similarity
IMG|UGV-GENOME-4426261_70	No significant similarity	No significant similarity	hypothetical_protein
IMG|UGV-GENOME-4426261_71	No significant similarity	No significant similarity	No significant similarity
IMG|UGV-GENOME-4426261_72	No significant similarity	No significant similarity	TIGR04255_family_protein
HMP.706846339.contig81847_53536_1	No significant similarity	No significant similarity	No significant similarity
HMP.706846339.contig81847_53536_2	Helicase_C_2	Helicase C-terminal domain	hypothetical_protein
HMP.706846339.contig81847_53536_3	No significant similarity	No significant similarity	No significant similarity
HMP.706846339.contig81847_53536_4	No significant similarity	No significant similarity	MULTISPECIES:_hypothetical_protein
HMP.706846339.contig81847_53536_5	No significant similarity	No significant similarity	No significant similarity
HMP.706846339.contig81847_53536_6	No significant similarity	No significant similarity	No significant similarity
HMP.706846339.contig81847_53536_7	No significant similarity	No significant similarity	MULTISPECIES:_hypothetical_protein
HMP.706846339.contig81847_53536_8	No significant similarity	No significant similarity	No significant similarity
HMP.706846339.contig81847_53536_9	No significant similarity	No significant similarity	No significant similarity
HMP.706846339.contig81847_53536_10	No significant similarity	No significant similarity	No significant similarity
HMP.706846339.contig81847_53536_11	ERCC4	ERCC4 domain	DNA_excision_repair_protein_ERCC-4
HMP.706846339.contig81847_53536_12	No significant similarity	No significant similarity	hypothetical_protein_BZ136_09240
HMP.706846339.contig81847_53536_13	No significant similarity	No significant similarity	No significant similarity
HMP.706846339.contig81847_53536_14	No significant similarity	No significant similarity	No significant similarity
HMP.706846339.contig81847_53536_15	No significant similarity	No significant similarity	hypothetical_protein
HMP.706846339.contig81847_53536_16	No significant similarity	No significant similarity	hypothetical_protein
HMP.706846339.contig81847_53536_17	Terminase_6C	Terminase RNaseH-like domain	hypothetical_protein
HMP.706846339.contig81847_53536_18	Phage_portal	Phage portal protein	phage_portal_protein
HMP.706846339.contig81847_53536_19	ADPrib_exo_Tox	ADP-ribosyltransferase exoenzyme	hypothetical_protein
HMP.706846339.contig81847_53536_20	No significant similarity	No significant similarity	hypothetical_protein
HMP.706846339.contig81847_53536_21	No significant similarity	No significant similarity	hypothetical_protein
HMP.706846339.contig81847_53536_22	No significant similarity	No significant similarity	No significant similarity
HMP.706846339.contig81847_53536_23	No significant similarity	No significant similarity	No significant similarity
HMP.706846339.contig81847_53536_24	No significant similarity	No significant similarity	hypothetical_protein
HMP.706846339.contig81847_53536_25	DUF5309	Family of unknown function (DUF5309)	hypothetical_protein
HMP.706846339.contig81847_53536_26	CarboxypepD_reg	Carboxypeptidase regulatory-like domain	exported_hypothetical_protein
HMP.706846339.contig81847_53536_27	No significant similarity	No significant similarity	No significant similarity
HMP.706846339.contig81847_53536_28	No significant similarity	No significant similarity	hypothetical_protein
HMP.706846339.contig81847_53536_29	No significant similarity	No significant similarity	HK97_gp10_family_phage_protein
HMP.706846339.contig81847_53536_30	No significant similarity	No significant similarity	hypothetical_protein
HMP.706846339.contig81847_53536_31	No significant similarity	No significant similarity	hypothetical_protein
HMP.706846339.contig81847_53536_32	No significant similarity	No significant similarity	hypothetical_protein
HMP.706846339.contig81847_53536_33	No significant similarity	No significant similarity	No significant similarity
HMP.706846339.contig81847_53536_34	No significant similarity	No significant similarity	hypothetical_protein
HMP.706846339.contig81847_53536_35	No significant similarity	No significant similarity	hypothetical_protein
HMP.706846339.contig81847_53536_36	No significant similarity	No significant similarity	hypothetical_protein
HMP.706846339.contig81847_53536_37	Transglut_core	Transglutaminase-like superfamily	transglutaminase_domain-containing_protein
HMP.706846339.contig81847_53536_38	No significant similarity	No significant similarity	hypothetical_protein
HMP.706846339.contig81847_53536_39	No significant similarity	No significant similarity	No significant similarity
HMP.706846339.contig81847_53536_40	DUF2634	Protein of unknown function (DUF2634)	hypothetical_protein
HMP.706846339.contig81847_53536_41	Baseplate_J	Baseplate J-like protein	hypothetical_protein
HMP.706846339.contig81847_53536_42	No significant similarity	No significant similarity	DUF1565_domain-containing_protein
HMP.706846339.contig81847_53536_43	No significant similarity	No significant similarity	hypothetical_protein
HMP.706846339.contig81847_53536_44	No significant similarity	No significant similarity	hypothetical_protein
HMP.706846339.contig81847_53536_45	No significant similarity	No significant similarity	hypothetical_protein
HMP.706846339.contig81847_53536_46	No significant similarity	No significant similarity	hypothetical_protein
HMP.706846339.contig81847_53536_47	No significant similarity	No significant similarity	No significant similarity
HMP.706846339.contig81847_53536_48	No significant similarity	No significant similarity	No significant similarity
HMP.706846339.contig81847_53536_49	PTR	Phage tail repeat like	hypothetical_protein_Msm_1688
HMP.706846339.contig81847_53536_50	No significant similarity	No significant similarity	hypothetical_protein_B655_2212
HMP.706846339.contig81847_53536_51	No significant similarity	No significant similarity	hypothetical_protein
HMP.706846339.contig81847_53536_52	No significant similarity	No significant similarity	No significant similarity
HMP.706846339.contig81847_53536_53	No significant similarity	No significant similarity	No significant similarity
HMP.706846339.contig81847_53536_54	No significant similarity	No significant similarity	hypothetical_protein
HMP.706846339.contig81847_53536_55	No significant similarity	No significant similarity	TIGR04255_family_protein
HMP.706846339.contig81847_53536_56	No significant similarity	No significant similarity	No significant similarity
HMP.706846339.contig81847_53536_57	No significant similarity	No significant similarity	hypothetical_protein
HMP.706846339.contig81847_53536_58	No significant similarity	No significant similarity	No significant similarity
HMP.706846339.contig81847_53536_59	No significant similarity	No significant similarity	site-specific_integrase
HMP.706846339.contig81847_53536_60	DUF4065	Domain of unknown function (DUF4065)	DUF4065_domain-containing_protein
HMP.706846339.contig81847_53536_61	No significant similarity	No significant similarity	hypothetical_protein
HMP.706846339.contig81847_53536_62	No significant similarity	No significant similarity	No significant similarity
HMP.706846339.contig81847_53536_63	No significant similarity	No significant similarity	No significant similarity
HMP.706846339.contig81847_53536_64	No significant similarity	No significant similarity	No significant similarity
HMP.706846339.contig81847_53536_65	No significant similarity	No significant similarity	No significant similarity
HMP.706846339.contig81847_53536_66	No significant similarity	No significant similarity	No significant similarity
HMP.706846339.contig81847_53536_67	No significant similarity	No significant similarity	No significant similarity
HMP.706846339.contig81847_53536_68	DUF1874	Domain of unknown function (DUF1874)	DUF1874_domain-containing_protein
HMP.706846339.contig81847_53536_69	No significant similarity	No significant similarity	hypothetical_protein
HMP.706846339.contig81847_53536_70	No significant similarity	No significant similarity	hypothetical_protein_A3I35_03015
HMP.706846339.contig81847_53536_71	No significant similarity	No significant similarity	hypothetical_protein_Drs3_00011
provir|Feng_Q_2015_NC_ERR688611.NODE_45_142494_1_1	DUF1724	Domain of unknown function (DUF1724)	DUF1724_domain-containing_protein
provir|Feng_Q_2015_NC_ERR688611.NODE_45_142494_1_2	Phage_integrase	Phage inte grase family	site-specific_integrase
provir|Feng_Q_2015_NC_ERR688611.NODE_45_142494_1_3	MazE_antitoxin	Antidote-t oxin recognition MazE, bacterial antitoxin	AbrB/MazE/SpoVT_family_DNA-binding_domain-containing_protein
provir|Feng_Q_2015_NC_ERR688611.NODE_45_142494_1_4	No significant similarity	No significant similarity	No significant similarity
provir|Feng_Q_2015_NC_ERR688611.NODE_45_142494_1_5	No significant similarity	No significant similarity	No significant similarity
provir|Feng_Q_2015_NC_ERR688611.NODE_45_142494_1_6	No significant similarity	No significant similarity	No significant similarity
provir|Feng_Q_2015_NC_ERR688611.NODE_45_142494_1_7	No significant similarity	No significant similarity	No significant similarity
provir|Feng_Q_2015_NC_ERR688611.NODE_45_142494_1_8	No significant similarity	No significant similarity	No significant similarity
provir|Feng_Q_2015_NC_ERR688611.NODE_45_142494_1_9	No significant similarity	No significant similarity	No significant similarity
provir|Feng_Q_2015_NC_ERR688611.NODE_45_142494_1_10	No significant similarity	No significant similarity	DUF1874_domain-containing_protein
provir|Feng_Q_2015_NC_ERR688611.NODE_45_142494_1_11	No significant similarity	No significant similarity	hypothetical_protein_UT82_C0018G0002
provir|Feng_Q_2015_NC_ERR688611.NODE_45_142494_1_12	No significant similarity	No significant similarity	hypothetical_protein
provir|Feng_Q_2015_NC_ERR688611.NODE_45_142494_1_13	No significant similarity	No significant similarity	hypothetical_protein
provir|Feng_Q_2015_NC_ERR688611.NODE_45_142494_1_14	No significant similarity	No significant similarity	No significant similarity
provir|Feng_Q_2015_NC_ERR688611.NODE_45_142494_1_15	No significant similarity	No significant similarity	No significant similarity
provir|Feng_Q_2015_NC_ERR688611.NODE_45_142494_1_16	No significant similarity	No significant similarity	No significant similarity
provir|Feng_Q_2015_NC_ERR688611.NODE_45_142494_1_17	No significant similarity	No significant similarity	No significant similarity
provir|Feng_Q_2015_NC_ERR688611.NODE_45_142494_1_18	No significant similarity	No significant similarity	No significant similarity
provir|Feng_Q_2015_NC_ERR688611.NODE_45_142494_1_19	No significant similarity	No significant similarity	No significant similarity
provir|Feng_Q_2015_NC_ERR688611.NODE_45_142494_1_20	No significant similarity	No significant similarity	hypothetical_protein_BZ138_05850
provir|Feng_Q_2015_NC_ERR688611.NODE_45_142494_1_21	No significant similarity	No significant similarity	MULTISPECIES:_hypothetical_protein
provir|Feng_Q_2015_NC_ERR688611.NODE_45_142494_1_22	No significant similarity	No significant similarity	hypothetical_protein
provir|Feng_Q_2015_NC_ERR688611.NODE_45_142494_1_23	No significant similarity	No significant similarity	No significant similarity
provir|Feng_Q_2015_NC_ERR688611.NODE_45_142494_1_24	No significant similarity	No significant similarity	No significant similarity
provir|Feng_Q_2015_NC_ERR688611.NODE_45_142494_1_25	No significant similarity	No significant similarity	hypothetical_protein
provir|Feng_Q_2015_NC_ERR688611.NODE_45_142494_1_26	Fer4_9	4Fe-4S dicluster domain	No significant similarity
provir|Feng_Q_2015_NC_ERR688611.NODE_45_142494_1_27	No significant similarity	No significant similarity	No significant similarity
provir|Feng_Q_2015_NC_ERR688611.NODE_45_142494_1_28	ERCC4	ERCC4 domain	DEAD/DEAH_box_helicase
provir|Feng_Q_2015_NC_ERR688611.NODE_45_142494_1_29	No significant similarity	No significant similarity	No significant similarity
provir|Feng_Q_2015_NC_ERR688611.NODE_45_142494_1_30	ParBc	ParB-like nuclease domain	ParB-like_nuclease_domain-containing_protein
provir|Feng_Q_2015_NC_ERR688611.NODE_45_142494_1_31	N6_N4_Mtase	DNA methylase	hypothetical_protein_AUJ63_04630
provir|Feng_Q_2015_NC_ERR688611.NODE_45_142494_1_32	No significant similarity	No significant similarity	hypothetical_protein
provir|Feng_Q_2015_NC_ERR688611.NODE_45_142494_1_33	LAGLIDADG_3	LAGLIDADG-like domain	hypothetical_protein
provir|Feng_Q_2015_NC_ERR688611.NODE_45_142494_1_34	Phage_portal	Phage portal protein	phage_portal_protein
provir|Feng_Q_2015_NC_ERR688611.NODE_45_142494_1_35	Phage_Mu_F	Phage Mu protein F like protein	hypothetical_protein
provir|Feng_Q_2015_NC_ERR688611.NODE_45_142494_1_36	No significant similarity	No significant similarity	hypothetical_protein
provir|Feng_Q_2015_NC_ERR688611.NODE_45_142494_1_37	No significant similarity	No significant similarity	hypothetical_protein
provir|Feng_Q_2015_NC_ERR688611.NODE_45_142494_1_38	No significant similarity	No significant similarity	No significant similarity
provir|Feng_Q_2015_NC_ERR688611.NODE_45_142494_1_39	No significant similarity	No significant similarity	No significant similarity
provir|Feng_Q_2015_NC_ERR688611.NODE_45_142494_1_40	No significant similarity	No significant similarity	No significant similarity
provir|Feng_Q_2015_NC_ERR688611.NODE_45_142494_1_41	No significant similarity	No significant similarity	No significant similarity
provir|Feng_Q_2015_NC_ERR688611.NODE_45_142494_1_42	No significant similarity	No significant similarity	No significant similarity
provir|Feng_Q_2015_NC_ERR688611.NODE_45_142494_1_43	No significant similarity	No significant similarity	No significant similarity
provir|Feng_Q_2015_NC_ERR688611.NODE_45_142494_1_44	No significant similarity	No significant similarity	hypothetical_protein
provir|Feng_Q_2015_NC_ERR688611.NODE_45_142494_1_45	No significant similarity	No significant similarity	No significant similarity
provir|Feng_Q_2015_NC_ERR688611.NODE_45_142494_1_46	No significant similarity	No significant similarity	hypothetical_protein_BZ138_06015
provir|Feng_Q_2015_NC_ERR688611.NODE_45_142494_1_47	No significant similarity	No significant similarity	No significant similarity
provir|Feng_Q_2015_NC_ERR688611.NODE_45_142494_1_48	No significant similarity	No significant similarity	phage_tail_tape_measure_protein
provir|Feng_Q_2015_NC_ERR688611.NODE_45_142494_1_49	No significant similarity	No significant similarity	No significant similarity
provir|Feng_Q_2015_NC_ERR688611.NODE_45_142494_1_50	Transglut_core	Transglutaminase-like superfamily	transglutaminase_domain-containing_protein
provir|Feng_Q_2015_NC_ERR688611.NODE_45_142494_1_51	No significant similarity	No significant similarity	No significant similarity
provir|Feng_Q_2015_NC_ERR688611.NODE_45_142494_1_52	No significant similarity	No significant similarity	hypothetical_protein
provir|Feng_Q_2015_NC_ERR688611.NODE_45_142494_1_53	No significant similarity	No significant similarity	No significant similarity
provir|Feng_Q_2015_NC_ERR688611.NODE_45_142494_1_54	DUF2634	Protein of unknown function (DUF2634)	hypothetical_protein
provir|Feng_Q_2015_NC_ERR688611.NODE_45_142494_1_55	Baseplate_J	Baseplate J-like protein	hypothetical_protein
provir|Feng_Q_2015_NC_ERR688611.NODE_45_142494_1_56	No significant similarity	No significant similarity	DUF1565_domain-containing_protein
provir|Feng_Q_2015_NC_ERR688611.NODE_45_142494_1_57	No significant similarity	No significant similarity	No significant similarity
provir|Feng_Q_2015_NC_ERR688611.NODE_45_142494_1_58	No significant similarity	No significant similarity	hypothetical_protein
provir|Feng_Q_2015_NC_ERR688611.NODE_45_142494_1_59	No significant similarity	No significant similarity	hypothetical_protein
provir|Feng_Q_2015_NC_ERR688611.NODE_45_142494_1_60	No significant similarity	No significant similarity	hypothetical_protein
provir|Feng_Q_2015_NC_ERR688611.NODE_45_142494_1_61	No significant similarity	No significant similarity	No significant similarity
provir|Feng_Q_2015_NC_ERR688611.NODE_45_142494_1_62	No significant similarity	No significant similarity	No significant similarity
provir|Feng_Q_2015_NC_ERR688611.NODE_45_142494_1_63	PTR	Phage tail repeat like	hypothetical_protein_DBY45_06555
provir|Feng_Q_2015_NC_ERR688611.NODE_45_142494_1_64	PMBR	Pseudomurein-binding repeat	hypothetical_protein
provir|Feng_Q_2015_NC_ERR688611.NODE_45_142494_1_65	No significant similarity	No significant similarity	No significant similarity
provir|Feng_Q_2015_NC_ERR688611.NODE_45_142494_1_66	No significant similarity	No significant similarity	No significant similarity
provir|Feng_Q_2015_NC_ERR688611.NODE_45_142494_1_67	No significant similarity	No significant similarity	No significant similarity

## Sheet: VC_359
ORF Name	Pfam	Pfam_description	NR_description
IMG|UGV-GENOME-0318983_1	No significant similarity	No significant similarity	No significant similarity
IMG|UGV-GENOME-0318983_2	No significant similarity	No significant similarity	No significant similarity
IMG|UGV-GENOME-0318983_3	No significant similarity	No significant similarity	No significant similarity
IMG|UGV-GENOME-0318983_4	No significant similarity	No significant similarity	No significant similarity
IMG|UGV-GENOME-0318983_5	No significant similarity	No significant similarity	No significant similarity
IMG|UGV-GENOME-0318983_6	No significant similarity	No significant similarity	hypothetical_protein
IMG|UGV-GENOME-0318983_7	No significant similarity	No significant similarity	No significant similarity
IMG|UGV-GENOME-0318983_8	Terminase_3	Phage term inase large subunit	PBSX_family_phage_terminase_large_subunit
IMG|UGV-GENOME-0318983_9	No significant similarity	No significant similarity	hypothetical_protein
IMG|UGV-GENOME-0318983_10	No significant similarity	No significant similarity	No significant similarity
IMG|UGV-GENOME-0318983_11	No significant similarity	No significant similarity	No significant similarity
IMG|UGV-GENOME-0318983_12	No significant similarity	No significant similarity	hypothetical_protein
IMG|UGV-GENOME-0318983_13	No significant similarity	No significant similarity	hypothetical_protein
IMG|UGV-GENOME-0318983_14	No significant similarity	No significant similarity	No significant similarity
IMG|UGV-GENOME-0318983_15	No significant similarity	No significant similarity	No significant similarity
IMG|UGV-GENOME-0318983_16	No significant similarity	No significant similarity	hypothetical_protein
IMG|UGV-GENOME-0318983_17	No significant similarity	No significant similarity	No significant similarity
IMG|UGV-GENOME-0318983_18	No significant similarity	No significant similarity	hypothetical_protein
IMG|UGV-GENOME-0318983_19	No significant similarity	No significant similarity	hypothetical_protein
IMG|UGV-GENOME-0318983_20	No significant similarity	No significant similarity	hypothetical_protein
IMG|UGV-GENOME-0318983_21	No significant similarity	No significant similarity	hypothetical_protein
IMG|UGV-GENOME-0318983_22	No significant similarity	No significant similarity	No significant similarity
IMG|UGV-GENOME-0318983_23	No significant similarity	No significant similarity	hypothetical_protein
IMG|UGV-GENOME-0318983_24	No significant similarity	No significant similarity	No significant similarity
IMG|UGV-GENOME-0318983_25	No significant similarity	No significant similarity	No significant similarity
IMG|UGV-GENOME-0318983_26	CarboxypepD_reg	Carboxypeptidase regulatory-like domain	hypothetical_protein_CVV28_02185
IMG|UGV-GENOME-0318983_27	Big_3_5	Bacterial Ig-like domain (group 3)	hypothetical_protein
IMG|UGV-GENOME-0318983_28	Peptidase_C71	Pseudomurein endo-isopeptidase Pei	hypothetical_protein
IMG|UGV-GENOME-0318983_29	No significant similarity	No significant similarity	No significant similarity
IMG|UGV-GENOME-0318983_30	No significant similarity	No significant similarity	hypothetical_protein
IMG|UGV-GENOME-0318983_31	Big_1	Bacterial Ig-like domain (group 1)	hypothetical_protein
IMG|UGV-GENOME-0318983_32	No significant similarity	No significant similarity	hypothetical_protein
IMG|UGV-GENOME-0318983_33	No significant similarity	No significant similarity	No significant similarity
IMG|UGV-GENOME-0318983_34	No significant similarity	No significant similarity	No significant similarity
IMG|UGV-GENOME-0318983_35	No significant similarity	No significant similarity	No significant similarity
IMG|UGV-GENOME-0318983_36	No significant similarity	No significant similarity	No significant similarity
IMG|UGV-GENOME-0318983_37	No significant similarity	No significant similarity	No significant similarity
IMG|UGV-GENOME-0318983_38	No significant similarity	No significant similarity	No significant similarity
IMG|UGV-GENOME-0318983_39	Fer4	4Fe-4S binding domain	No significant similarity
IMG|UGV-GENOME-0318983_40	No significant similarity	No significant similarity	No significant similarity
IMG|UGV-GENOME-0318983_41	No significant similarity	No significant similarity	No significant similarity
IMG|UGV-GENOME-0318983_42	No significant similarity	No significant similarity	No significant similarity
IMG|UGV-GENOME-0318983_43	No significant similarity	No significant similarity	hypothetical_protein
IMG|UGV-GENOME-0318983_44	ASCH	ASCH domain	MULTISPECIES:_ASCH_domain-containing_protein
IMG|UGV-GENOME-0318983_45	dUTPase	dUTPase	dCTP_deaminase
IMG|UGV-GENOME-0318983_46	No significant similarity	No significant similarity	No significant similarity
IMG|UGV-GENOME-0318983_47	Guanylate_kin	Guanylate kinase	guanylate_kinase
IMG|UGV-GENOME-0318983_48	No significant similarity	No significant similarity	No significant similarity
IMG|UGV-GENOME-0318983_49	No significant similarity	No significant similarity	No significant similarity
IMG|UGV-GENOME-0318983_50	No significant similarity	No significant similarity	No significant similarity
IMG|UGV-GENOME-0318983_51	No significant similarity	No significant similarity	No significant similarity
IMG|UGV-GENOME-0318983_52	No significant similarity	No significant similarity	No significant similarity
IMG|UGV-GENOME-0318983_53	No significant similarity	No significant similarity	No significant similarity
IMG|UGV-GENOME-0318983_54	No significant similarity	No significant similarity	No significant similarity
IMG|UGV-GENOME-0318983_55	No significant similarity	No significant similarity	thymidylate_synthase
IMG|UGV-GENOME-0318983_56	No significant similarity	No significant similarity	No significant similarity
IMG|UGV-GENOME-0318983_57	No significant similarity	No significant similarity	No significant similarity
IMG|UGV-GENOME-0318983_58	No significant similarity	No significant similarity	proliferating_cell_nuclear_antigen_(pcna)
IMG|UGV-GENOME-0318983_59	Metallophos	Calcineurin-like phosphoesterase	Calcineurin-like_phosphoesterase_superfamily_domain_protein
IMG|UGV-GENOME-0318983_60	No significant similarity	No significant similarity	No significant similarity
IMG|UGV-GENOME-0318983_61	No significant similarity	No significant similarity	No significant similarity
IMG|UGV-GENOME-0318983_62	ERCC4	ERCC4 domain	DEAD/DEAH_box_helicase
IMG|UGV-GENOME-0318983_63	zf-CHC2	CHC2 zinc finger	hypothetical_protein
IMG|UGV-GENOME-0318983_64	No significant similarity	No significant similarity	hypothetical_protein_AMQ22_02093
IMG|UGV-GENOME-0318983_65	No significant similarity	No significant similarity	No significant similarity
IMG|UGV-GENOME-0318983_66	No significant similarity	No significant similarity	No significant similarity
IMG|UGV-GENOME-0318983_67	No significant similarity	No significant similarity	No significant similarity
IMG|UGV-GENOME-0318983_68	No significant similarity	No significant similarity	No significant similarity
IMG|UGV-GENOME-0318983_69	No significant similarity	No significant similarity	No significant similarity

## Sheet: VC_370
ORF Name	Pfam	Pfam_description	NR_description
IMG|UGV-GENOME-0327529_1	Big_1	Bacterial Ig-like domain (group 1)	carbohydrate_binding_domain_protein
IMG|UGV-GENOME-0327529_2	No significant similarity	No significant similarity	hypothetical_protein
IMG|UGV-GENOME-0327529_3	No significant similarity	No significant similarity	No significant similarity
IMG|UGV-GENOME-0327529_4	Big_3_5	Bacterial Ig-like domain (group 3)	hypothetical_protein
IMG|UGV-GENOME-0327529_5	No significant similarity	No significant similarity	No significant similarity
IMG|UGV-GENOME-0327529_6	No significant similarity	No significant similarity	hypothetical_protein
IMG|UGV-GENOME-0327529_7	No significant similarity	No significant similarity	No significant similarity
IMG|UGV-GENOME-0327529_8	No significant similarity	No significant similarity	No significant similarity
IMG|UGV-GENOME-0327529_9	No significant similarity	No significant similarity	No significant similarity
IMG|UGV-GENOME-0327529_10	CarboxypepD_reg	Carboxypeptidase regulatory-like domain	hypothetical_protein
IMG|UGV-GENOME-0327529_11	No significant similarity	No significant similarity	No significant similarity
IMG|UGV-GENOME-0327529_12	No significant similarity	No significant similarity	No significant similarity
IMG|UGV-GENOME-0327529_13	No significant similarity	No significant similarity	hypothetical_protein
IMG|UGV-GENOME-0327529_14	No significant similarity	No significant similarity	No significant similarity
IMG|UGV-GENOME-0327529_15	No significant similarity	No significant similarity	hypothetical_protein
IMG|UGV-GENOME-0327529_16	No significant similarity	No significant similarity	hypothetical_protein
IMG|UGV-GENOME-0327529_17	No significant similarity	No significant similarity	No significant similarity
IMG|UGV-GENOME-0327529_18	No significant similarity	No significant similarity	hypothetical_protein_A4E26_00141
IMG|UGV-GENOME-0327529_19	Terminase_3	Phage terminase large subunit	PBSX_family_phage_terminase_large_subunit
IMG|UGV-GENOME-0327529_20	No significant similarity	No significant similarity	No significant similarity
IMG|UGV-GENOME-0327529_21	No significant similarity	No significant similarity	No significant similarity
IMG|UGV-GENOME-0327529_22	No significant similarity	No significant similarity	No significant similarity
IMG|UGV-GENOME-0327529_23	No significant similarity	No significant similarity	No significant similarity
IMG|UGV-GENOME-0327529_24	No significant similarity	No significant similarity	hypothetical_protein
IMG|UGV-GENOME-0327529_25	No significant similarity	No significant similarity	Glutamine_amidotransferases_class-II
IMG|UGV-GENOME-0327529_26	Amidoligase_2	Putative amidoligase enzyme	No significant similarity
IMG|UGV-GENOME-0327529_27	No significant similarity	No significant similarity	No significant similarity
IMG|UGV-GENOME-0327529_28	No significant similarity	No significant similarity	No significant similarity
IMG|UGV-GENOME-0327529_29	CBFD_NFYB_HMF	Histone-like transcription factor (CBF/NF-Y) and archaeal histone	histone_family_protein
IMG|UGV-GENOME-0327529_30	No significant similarity	No significant similarity	hypothetical_protein
IMG|UGV-GENOME-0327529_31	No significant similarity	No significant similarity	No significant similarity
IMG|UGV-GENOME-0327529_32	No significant similarity	No significant similarity	hypothetical_protein
IMG|UGV-GENOME-0327529_33	Phage_integrase	Phage integrase family	site-specific_integrase
IMG|UGV-GENOME-0327529_34	No significant similarity	No significant similarity	No significant similarity
IMG|UGV-GENOME-0327529_35	No significant similarity	No significant similarity	No significant similarity
IMG|UGV-GENOME-0327529_36	No significant similarity	No significant similarity	No significant similarity
IMG|UGV-GENOME-0327529_37	No significant similarity	No significant similarity	No significant similarity
IMG|UGV-GENOME-0327529_38	No significant similarity	No significant similarity	No significant similarity
IMG|UGV-GENOME-0327529_39	No significant similarity	No significant similarity	No significant similarity
IMG|UGV-GENOME-0327529_40	No significant similarity	No significant similarity	No significant similarity
IMG|UGV-GENOME-0327529_41	No significant similarity	No significant similarity	DUF1874_domain-containing_protein
IMG|UGV-GENOME-0327529_42	RecT	RecT family	recombinase_RecT
IMG|UGV-GENOME-0327529_43	No significant similarity	No significant similarity	No significant similarity
IMG|UGV-GENOME-0327529_44	No significant similarity	No significant similarity	hypothetical_protein
IMG|UGV-GENOME-0327529_45	No significant similarity	No significant similarity	No significant similarity
IMG|UGV-GENOME-0327529_46	No significant similarity	No significant similarity	proliferating_cell_nuclear_antigen_(pcna)
IMG|UGV-GENOME-0327529_47	No significant similarity	No significant similarity	guanylate_kinase
IMG|UGV-GENOME-0327529_48	Guanylate_kin	Guanylate kinase	thymidylate_synthase
IMG|UGV-GENOME-0327529_49	Thymidylat_synt	Thymidylate synthase	No significant similarity
IMG|UGV-GENOME-0327529_50	No significant similarity	No significant similarity	No significant similarity
IMG|UGV-GENOME-0327529_51	No significant similarity	No significant similarity	No significant similarity
IMG|UGV-GENOME-0327529_52	No significant similarity	No significant similarity	No significant similarity
IMG|UGV-GENOME-0327529_53	No significant similarity	No significant similarity	No significant similarity
IMG|UGV-GENOME-0327529_54	No significant similarity	No significant similarity	No significant similarity
IMG|UGV-GENOME-0327529_55	No significant similarity	No significant similarity	hypothetical_protein
IMG|UGV-GENOME-0327529_56	No significant similarity	No significant similarity	No significant similarity
IMG|UGV-GENOME-0327529_57	No significant similarity	No significant similarity	No significant similarity
IMG|UGV-GENOME-0327529_58	No significant similarity	No significant similarity	No significant similarity
IMG|UGV-GENOME-0327529_59	No significant similarity	No significant similarity	No significant similarity
IMG|UGV-GENOME-0327529_60	Fer4	4Fe-4S binding domain	No significant similarity
IMG|UGV-GENOME-0327529_61	No significant similarity	No significant similarity	No significant similarity
IMG|UGV-GENOME-0327529_62	No significant similarity	No significant similarity	No significant similarity
IMG|UGV-GENOME-0327529_63	No significant similarity	No significant similarity	hypothetical_protein
IMG|UGV-GENOME-0327529_64	No significant similarity	No significant similarity	No significant similarity
IMG|UGV-GENOME-0327529_65	dUTPase	dUTPase	dCTP_deaminase
IMG|UGV-GENOME-0327529_66	ERCC4	ERCC4 domain	No significant similarity
IMG|UGV-GENOME-0327529_67	No significant similarity	No significant similarity	No significant similarity
IMG|UGV-GENOME-0327529_68	No significant similarity	No significant similarity	hypothetical_protein
IMG|UGV-GENOME-0327529_69	No significant similarity	No significant similarity	No significant similarity
IMG|UGV-GENOME-0327529_70	No significant similarity	No significant similarity	hypothetical_protein
IMG|UGV-GENOME-0327529_71	No significant similarity	No significant similarity	No significant similarity
IMG|UGV-GENOME-0327529_72	No significant similarity	No significant similarity	hypothetical_protein

## Sheet: VC_440
ORF Name	Pfam	Pfam_description	NR_description
IMG|Norman_113_NODE_25_length_2504_cov_6.768477_1	No significant similarity	No significant similarity	Rep
IMG|Norman_113_NODE_25_length_2504_cov_6.768477_2	No significant similarity	No significant similarity	No significant similarity
IMG|Norman_113_NODE_25_length_2504_cov_6.768477_3	No significant similarity	No significant similarity	cap_protein
IMG|Norman_113_NODE_25_length_2504_cov_6.768477_4	No significant similarity	No significant similarity	No significant similarity
IMG|Norman_113_NODE_25_length_2504_cov_6.768477_5	No significant similarity	No significant similarity	rep_protein
	No significant similarity	No significant similarity	No significant similarity
	No significant similarity	No significant similarity	No significant similarity
IMG|UGV-GENOME-0001201_1	No significant similarity	No significant similarity	No significant similarity
IMG|UGV-GENOME-0001201_2	No significant similarity	No significant similarity	Cap
IMG|UGV-GENOME-0001201_3	No significant similarity	No significant similarity	No significant similarity
IMG|UGV-GENOME-0001201_4	No significant similarity	No significant similarity	rep_protein
	No significant similarity	No significant similarity	No significant similarity
PVD|GVD|Norman_106_NODE_37_length_2504_cov_7.888934_1	No significant similarity	No significant similarity	Cap
PVD|GVD|Norman_106_NODE_37_length_2504_cov_7.888934_2	No significant similarity	No significant similarity	No significant similarity
PVD|GVD|Norman_106_NODE_37_length_2504_cov_7.888934_3	No significant similarity	No significant similarity	Rep
PVD|GVD|Norman_106_NODE_37_length_2504_cov_7.888934_4	No significant similarity	No significant similarity	No significant similarity
PVD|GVD|Norman_106_NODE_37_length_2504_cov_7.888934_5	No significant similarity	No significant similarity	cap_protein
